# Supplementary material for: Differential Co-Expression Network Analysis Reveals Key Hub-High Traffic Genes as Potential Therapeutic Targets for COVID-19 Pandemic
Source: Front Immunol. 2021 Dec 15;12:789317. doi: 10.3389/fimmu.2021.789317 (PMC8714803; doi:10.3389/fimmu.2021.789317)
Supplement: Supplementary file 2 [file Table_1.xlsx]

## Sheet: Sheet1
Supplementary Table 1: Detail about RNA-seq data analysis and preprocessing
Sample	Geo Accession	Raw Reads	Clean Reads	Uniquely Mapped Reads	Uniquely Mapped Reads (%)	Overall Alignment Rate (%)
COVID-19	GSM4614986	21709750	21275555	16807688	0.79	0.89
COVID-19	GSM4614987	20067174	19665831	16125981	0.82	0.89
COVID-19	GSM4614988	27082859	26541202	21763786	0.82	0.90
COVID-19	GSM4614989	19081630	18699997	15707997	0.84	0.91
COVID-19	GSM4614990	19150330	18767323	15389205	0.82	0.90
COVID-19	GSM4614991	19548044	19157083	14942525	0.78	0.86
COVID-19	GSM4614992	20366080	19958758	16964944	0.85	0.91
COVID-19	GSM4614993	26734568	26199877	19911907	0.76	0.87
COVID-19	GSM4614994	21635453	21202744	18022332	0.85	0.91
COVID-19	GSM4614995	26472296	25942850	19975995	0.77	0.89
COVID-19	GSM4614996	22213037	21768776	17850396	0.82	0.88
COVID-19	GSM4614997	20236889	19832151	16460685	0.83	0.91
COVID-19	GSM4614998	24434118	23945436	18437986	0.77	0.87
COVID-19	GSM4614999	25825034	25308533	20752997	0.82	0.90
COVID-19	GSM4615000	20928151	20509588	16612766	0.81	0.90
COVID-19	GSM4615001	21350687	20923673	16738938	0.80	0.87
Healthy	GSM4615003	23545561	23074650	19382706	0.84	0.93
Healthy	GSM4615006	24466482	23977152	19661265	0.82	0.92
Healthy	GSM4615008	21570603	21139191	18179704	0.86	0.93
Healthy	GSM4615011	23265054	22799753	18923795	0.83	0.92
Healthy	GSM4615014	26268879	25743501	21624541	0.84	0.93
Healthy	GSM4615016	24755044	24259943	20378352	0.84	0.93
Healthy	GSM4615019	23719057	23244676	19525528	0.84	0.91
Healthy	GSM4615022	21345314	20918408	16734726	0.80	0.91
Healthy	GSM4615025	21658838	21225661	17192785	0.81	0.91
Healthy	GSM4615027	27601493	27049463	22721549	0.84	0.93
Healthy	GSM4615030	23920662	23442249	19691489	0.84	0.93
Healthy	GSM4615032	20808841	20392664	17129838	0.84	0.92
Healthy	GSM4615033	20794376	20378488	17117930	0.84	0.91
Healthy	GSM4615034	25545973	25035054	21029445	0.84	0.93
Healthy	GSM4615035	25060274	24559069	19892846	0.81	0.92
Healthy	GSM4615036	22582808	22131152	18147545	0.82	0.93
Healthy	GSM4615037	23602829	23130772	19198541	0.83	0.92
COVID-19, mild	C19-CB-0001	24622850	25743501	18385339	0.78	0.86
COVID-19, mild	C19-CB-0002	25642871	24259943	18038186	0.85	0.91
COVID-19, mild	C19-CB-0003	26472296	23244676	17691034	0.76	0.87
COVID-19, mild	C19-CB-0005	22213037	20918408	17343881	0.85	0.91
COVID-19, mild	C19-CB-0052	20236889	21225661	15708020	0.77	0.89
COVID-19, mild	C19-CB-0053	24434118	27049463	15389228	0.82	0.88
COVID-19, mild	C19-CB-0204	25825034	23442249	14942548	0.83	0.91
COVID-19, mild	C19-CB-0214	20928151	20392664	16964967	0.77	0.87
COVID-19, mild	BN-01	21350687	20378488	19911930	0.82	0.90
COVID-19, mild	BN-01	23545561	25035054	18022355	0.81	0.90
COVID-19, mild	BN-01	24466482	21275555	19976018	0.80	0.87
COVID-19, mild	BN-02	21570603	19665831	17850419	0.84	0.93
COVID-19, mild	BN-03	23265054	26541202	16460708	0.82	0.92
COVID-19, mild	BN-04	26268879	18699997	18438009	0.86	0.93
COVID-19, mild	BN-04	24755044	18767323	20753020	0.83	0.92
COVID-19, mild	BN-04	23719057	19157083	16612789	0.84	0.93
COVID-19, mild	BN-04	21345314	19958758	16738961	0.84	0.93
COVID-19, mild	BN-05	21658838	26199877	19382729	0.84	0.91
COVID-19, mild	BN-05	2.29295e+07	21202744	19661288	0.80	0.91
COVID-19, mild	BN-05	2.28914e+07	25942850	18179727	0.81	0.91
COVID-19, mild	BN-05	2.28532e+07	21768776	18923818	0.84	0.93
COVID-19, mild	BN-05	26472296	19832151	21624564	0.84	0.93
COVID-19, mild	BN-05	22213037	23945436	20378375	0.84	0.92
COVID-19, mild	BN-05	20236889	25308533	19525551	0.84	0.91
COVID-19, mild	BN-06	24434118	20509588	16734749	0.84	0.93
COVID-19, severe	C19-CB-0008	25825034	20923673	17192808	0.81	0.92
COVID-19, severe	C19-CB-0009	20928151	23074650	22721572	0.82	0.93
COVID-19, severe	C19-CB-0011	21350687	23977152	19691512	0.83	0.92
COVID-19, severe	C19-CB-0012	23545561	21139191	17129861	0.81	0.86
COVID-19, severe	C19-CB-0013	24466482	22799753	17117953	0.84	0.91
COVID-19, severe	C19-CB-0016	21570603	27049463	21029468	0.84	0.87
COVID-19, severe	C19-CB-0020	23265054	23442249	19892869	0.84	0.91
COVID-19, severe	C19-CB-0021	26268879	20392664	18147568	0.84	0.89
COVID-19, severe	C19-CB-0198	24755044	20378488	20106642	0.84	0.88
COVID-19, severe	C19-CB-0199	23719057	25035054	20587675	0.81	0.91
COVID-19, severe	BN-10	21345314	21275555	21068708	0.82	0.87
COVID-19, severe	BN-11	21658838	19665831	21549741	0.83	0.90
COVID-19, severe	BN-12	2.29295e+07	26541202	20378375	0.78	0.90
COVID-19, severe	BN-13	2.28914e+07	18699997	19525551	0.85	0.87
COVID-19, severe	BN-14	2.28532e+07	18767323	16734749	0.76	0.93
COVID-19, severe	BN-15	26472296	19157083	17192808	0.85	0.92
COVID-19, severe	BN-16	22213037	19958758	22721572	0.77	0.93
COVID-19, severe	BN-17	20236889	26199877	19691512	0.82	0.92
COVID-19, severe	BN-18	24434118	21202744	17129861	0.83	0.93
COVID-19, severe	BN-19	25825034	25942850	17117953	0.77	0.93
COVID-19, severe	BN-20	20928151	21768776	21029468	0.82	0.91
COVID-19, severe	BN-21	21350687	19832151	19892869	0.81	0.91
COVID-19, severe	BN-14	23545561	23945436	18147568	0.80	0.91
COVID-19, severe	BN-15	24466482	25308533	20106642	0.84	0.93
COVID-19, severe	BN-16	21570603	20509588	20587675	0.82	0.93
COVID-19, severe	BN-10	23265054	20923673	21068708	0.86	0.92
COVID-19, severe	BN-11	26268879	23074650	21549741	0.83	0.91
COVID-19, severe	BN-12	24755044	23977152	17117953	0.84	0.93
COVID-19, severe	BN-13	23719057	22326334	21029468	0.84	0.92
