# Supplementary material for: Differential Co-Expression Network Analysis Reveals Key Hub-High Traffic Genes as Potential Therapeutic Targets for COVID-19 Pandemic
Source: Front Immunol. 2021 Dec 15;12:789317. doi: 10.3389/fimmu.2021.789317 (PMC8714803; doi:10.3389/fimmu.2021.789317)
Supplement: Supplementary file 3 [file Table_2.xlsx]

## Sheet: COVID-19 
Supplementary Table 2: Normalized and filtered gene expression matrix of COVID-19 samples
Gene_id	Symbol	COVID_19_01	COVID_19_02	COVID_19_03	COVID_19_04	COVID_19_05	COVID_19_06	COVID_19_07	COVID_19_08	COVID_19_09	COVID_19_10	COVID_19_11	COVID_19_12	COVID_19_13	COVID_19_14	COVID_19_15	COVID_19_16	COVID_19_17	COVID_19_18	COVID_19_19	COVID_19_20	COVID_19_21	COVID_19_22	COVID_19_23	COVID_19_24	COVID_19_25	COVID_19_26	COVID_19_27	COVID_19_28	COVID_19_29	COVID_19_30	COVID_19_31	COVID_19_32	COVID_19_33	COVID_19_34	COVID_19_35	COVID_19_36	COVID_19_37	COVID_19_38	COVID_19_39	COVID_19_40	COVID_19_41	COVID_19_42	COVID_19_43	COVID_19_44	COVID_19_45	COVID_19_46	COVID_19_47	COVID_19_48
ENSG00000279457	WASH9P	0.841443	1.07184	-1.31945	-0.955547	-0.827183	-1.63012	-1.27979	0.136167	-0.530314	1.05193	-0.894152	-0.617955	0.0699821	0.742126	-0.265844	1.17857	0.742216	-0.265754	1.17866	0.742306	-0.265664	1.17875	0.742396	-0.265574	1.17884	0.742486	-0.265484	1.17893	0.742576	-0.265394	1.17902	0.742666	-0.265304	1.17911	0.742756	-0.265214	1.1792	0.742846	-0.265124	1.17929	0.742936	-0.265034	1.17938	0.743026	-0.264944	1.17947	0.743116	-0.264854
ENSG00000225972	MTND1P23	-0.597224	1.22218	-0.959101	-0.906313	1.3593	-0.968621	-0.555585	1.19308	1.1718	1.30304	-0.499645	1.22989	1.22406	1.40818	1.38459	1.33292	1.40827	1.38468	1.33301	1.40836	1.38477	1.3331	1.40845	1.38486	1.33319	1.40854	1.38495	1.33328	1.40863	1.38504	1.33337	1.40872	1.38513	1.33346	1.40881	1.38522	1.33355	1.4089	1.38531	1.33364	1.40899	1.3854	1.33373	1.40908	1.38549	1.33382	1.40917	1.38558
ENSG00000225630	MTND2P28	0.407185	0.0750595	0.257331	-0.0804162	-0.0440578	0.215674	0.0339108	0.0380444	-0.116754	0.322633	0.1942	0.220819	0.0108016	0.207819	0.026278	0.224849	0.207909	0.026368	0.224939	0.207999	0.026458	0.225029	0.208089	0.026548	0.225119	0.208179	0.026638	0.225209	0.208269	0.026728	0.225299	0.208359	0.026818	0.225389	0.208449	0.026908	0.225479	0.208539	0.026998	0.225569	0.208629	0.027088	0.225659	0.208719	0.027178	0.225749	0.208809	0.027268
ENSG00000237973	MTCO1P12	-0.366327	-0.955662	2.11806	1.94419	-0.0883045	-0.661962	2.10632	1.32214	-0.587526	0.0948852	-0.446916	-0.529237	1.22075	2.42411	-0.419665	0.211294	2.4242	-0.419575	0.211384	2.42429	-0.419485	0.211474	2.42438	-0.419395	0.211564	2.42447	-0.419305	0.211654	2.42456	-0.419215	0.211744	2.42465	-0.419125	0.211834	2.42474	-0.419035	0.211924	2.42483	-0.418945	0.212014	2.42492	-0.418855	0.212104	2.42501	-0.418765	0.212194	2.4251	-0.418675
ENSG00000248527	MTATP6P1	0.56671	0.0686141	0.137188	-0.0923771	0.31579	0.341918	0.0740692	-0.00547438	-0.160106	0.479196	0.291226	0.0960228	0.286789	0.370099	0.299591	0.50428	0.370189	0.299681	0.50437	0.370279	0.299771	0.50446	0.370369	0.299861	0.50455	0.370459	0.299951	0.50464	0.370549	0.300041	0.50473	0.370639	0.300131	0.50482	0.370729	0.300221	0.50491	0.370819	0.300311	0.505	0.370909	0.300401	0.50509	0.370999	0.300491	0.50518	0.371089	0.300581
ENSG00000228327	NA	0.794662	1.12497	0.255749	0.148359	0.198213	-1.02948	0.12099	-0.672238	0.638734	-0.186767	-0.0630422	-0.404966	-2.10966	-1.29701	-2.26639	-0.781172	-1.29692	-2.2663	-0.781082	-1.29683	-2.26621	-0.780992	-1.29674	-2.26612	-0.780902	-1.29665	-2.26603	-0.780812	-1.29656	-2.26594	-0.780722	-1.29647	-2.26585	-0.780632	-1.29638	-2.26576	-0.780542	-1.29629	-2.26567	-0.780452	-1.2962	-2.26558	-0.780362	-1.29611	-2.26549	-0.780272	-1.29602	-2.2654
ENSG00000228794	LINC01128	-0.44641	-0.606028	-0.69337	1.06344	0.0573763	-0.73377	-0.0572003	-1.57107	-0.862752	-1.13939	-0.748728	-0.17635	-0.735412	-1.93476	-2.13839	-1.22957	-1.93467	-2.1383	-1.22948	-1.93458	-2.13821	-1.22939	-1.93449	-2.13812	-1.2293	-1.9344	-2.13803	-1.22921	-1.93431	-2.13794	-1.22912	-1.93422	-2.13785	-1.22903	-1.93413	-2.13776	-1.22894	-1.93404	-2.13767	-1.22885	-1.93395	-2.13758	-1.22876	-1.93386	-2.13749	-1.22867	-1.93377	-2.1374
ENSG00000225880	LINC00115	-1.36011	0.891208	-1.22248	0.798309	2.51411	0.42679	-0.291457	-0.212585	0.0577471	0.894753	0.149325	1.49006	-0.810782	1.3825	0.954405	0.0980298	1.38259	0.954495	0.0981198	1.38268	0.954585	0.0982098	1.38277	0.954675	0.0982998	1.38286	0.954765	0.0983898	1.38295	0.954855	0.0984798	1.38304	0.954945	0.0985698	1.38313	0.955035	0.0986598	1.38322	0.955125	0.0987498	1.38331	0.955215	0.0988398	1.3834	0.955305	0.0989298	1.38349	0.955395
ENSG00000187961	KLHL17	-1.09036	0.116864	0.873229	0.616784	0.753046	1.0571	0.071052	-0.701338	-1.10721	-0.955378	-1.27141	-0.739989	-1.13498	-0.853019	1.22522	0.49498	-0.852929	1.22531	0.49507	-0.852839	1.2254	0.49516	-0.852749	1.22549	0.49525	-0.852659	1.22558	0.49534	-0.852569	1.22567	0.49543	-0.852479	1.22576	0.49552	-0.852389	1.22585	0.49561	-0.852299	1.22594	0.4957	-0.852209	1.22603	0.49579	-0.852119	1.22612	0.49588	-0.852029	1.22621
ENSG00000187583	PLEKHN1	-1.68168	0.996673	1.04095	0.617394	1.10437	-0.0896552	0.534633	1.49183	2.16794	0.716863	0.66509	0.30889	0.945698	0.968804	0.942055	0.770425	0.968894	0.942145	0.770515	0.968984	0.942235	0.770605	0.969074	0.942325	0.770695	0.969164	0.942415	0.770785	0.969254	0.942505	0.770875	0.969344	0.942595	0.770965	0.969434	0.942685	0.771055	0.969524	0.942775	0.771145	0.969614	0.942865	0.771235	0.969704	0.942955	0.771325	0.969794	0.943045
ENSG00000188290	HES4	0.464332	2.36944	0.0780833	0.501896	1.2961	-0.0787709	0.819094	-0.289426	0.221232	-0.860751	0.393696	-0.036613	0.21972	-3.86662	0.14318	0.0477386	-3.86653	0.14327	0.0478286	-3.86644	0.14336	0.0479186	-3.86635	0.14345	0.0480086	-3.86626	0.14354	0.0480986	-3.86617	0.14363	0.0481886	-3.86608	0.14372	0.0482786	-3.86599	0.14381	0.0483686	-3.8659	0.1439	0.0484586	-3.86581	0.14399	0.0485486	-3.86572	0.14408	0.0486386	-3.86563	0.14417
ENSG00000187608	ISG15	1.21882	3.70139	0.605022	-0.0144099	-0.311064	-0.206346	-0.108827	1.6101	2.80792	-0.85813	-0.377527	-0.542461	-0.266726	-1.05136	-0.229964	-0.757562	-1.05127	-0.229874	-0.757472	-1.05118	-0.229784	-0.757382	-1.05109	-0.229694	-0.757292	-1.051	-0.229604	-0.757202	-1.05091	-0.229514	-0.757112	-1.05082	-0.229424	-0.757022	-1.05073	-0.229334	-0.756932	-1.05064	-0.229244	-0.756842	-1.05055	-0.229154	-0.756752	-1.05046	-0.229064	-0.756662	-1.05037	-0.228974
ENSG00000188157	AGRN	0.792255	2.44949	1.55063	0.25058	-0.113409	-0.251307	-0.646199	0.715224	0.825101	-0.361878	-0.476848	0.88297	0.55199	0.35821	0.993446	-0.880997	0.3583	0.993536	-0.880907	0.35839	0.993626	-0.880817	0.35848	0.993716	-0.880727	0.35857	0.993806	-0.880637	0.35866	0.993896	-0.880547	0.35875	0.993986	-0.880457	0.35884	0.994076	-0.880367	0.35893	0.994166	-0.880277	0.35902	0.994256	-0.880187	0.35911	0.994346	-0.880097	0.3592	0.994436
ENSG00000131591	C1orf159	0.134709	0.818917	0.321813	1.41466	0.489523	0.123296	-0.201798	-2.04583	-0.934422	-1.85132	-0.596073	0.371128	-1.4819	-1.08041	-1.54592	-0.2364	-1.08032	-1.54583	-0.23631	-1.08023	-1.54574	-0.23622	-1.08014	-1.54565	-0.23613	-1.08005	-1.54556	-0.23604	-1.07996	-1.54547	-0.23595	-1.07987	-1.54538	-0.23586	-1.07978	-1.54529	-0.23577	-1.07969	-1.5452	-0.23568	-1.0796	-1.54511	-0.23559	-1.07951	-1.54502	-0.2355	-1.07942	-1.54493
ENSG00000186891	TNFRSF18	1.30759	0.384903	-0.0997195	0.755505	0.205714	2.16174	-1.10104	-0.923053	-2.02034	-1.94976	0.812999	0.00879366	-0.0927008	0.396418	-1.74053	-1.36362	0.396508	-1.74044	-1.36353	0.396598	-1.74035	-1.36344	0.396688	-1.74026	-1.36335	0.396778	-1.74017	-1.36326	0.396868	-1.74008	-1.36317	0.396958	-1.73999	-1.36308	0.397048	-1.7399	-1.36299	0.397138	-1.73981	-1.3629	0.397228	-1.73972	-1.36281	0.397318	-1.73963	-1.36272	0.397408	-1.73954
ENSG00000186827	TNFRSF4	0.0443736	1.57198	0.376924	0.933603	1.20061	0.719704	0.0917609	-2.67054	-1.69707	-0.633761	0.515321	-0.489291	0.352246	1.4779	-2.34935	0.251913	1.47799	-2.34926	0.252003	1.47808	-2.34917	0.252093	1.47817	-2.34908	0.252183	1.47826	-2.34899	0.252273	1.47835	-2.3489	0.252363	1.47844	-2.34881	0.252453	1.47853	-2.34872	0.252543	1.47862	-2.34863	0.252633	1.47871	-2.34854	0.252723	1.4788	-2.34845	0.252813	1.47889	-2.34836
ENSG00000162572	SCNN1D	0.323799	1.64789	-0.430476	0.676007	-1.27537	-0.054822	-0.0391779	-0.783767	-2.72316	-2.13534	0.261613	0.84768	-0.00300433	-0.601579	0.131196	-0.13724	-0.601489	0.131286	-0.13715	-0.601399	0.131376	-0.13706	-0.601309	0.131466	-0.13697	-0.601219	0.131556	-0.13688	-0.601129	0.131646	-0.13679	-0.601039	0.131736	-0.1367	-0.600949	0.131826	-0.13661	-0.600859	0.131916	-0.13652	-0.600769	0.132006	-0.13643	-0.600679	0.132096	-0.13634	-0.600589	0.132186
ENSG00000131584	ACAP3	-2.72726	0.133939	-0.730839	1.3731	1.37469	0.770242	-0.386564	0.552939	-1.5712	-0.365884	-0.35463	0.308083	1.24669	0.537649	0.240519	0.0076094	0.537739	0.240609	0.0076994	0.537829	0.240699	0.0077894	0.537919	0.240789	0.0078794	0.538009	0.240879	0.0079694	0.538099	0.240969	0.0080594	0.538189	0.241059	0.0081494	0.538279	0.241149	0.0082394	0.538369	0.241239	0.0083294	0.538459	0.241329	0.0084194	0.538549	0.241419	0.0085094	0.538639	0.241509
ENSG00000224051	CPTP	-0.303852	1.29051	-0.258105	-0.926458	1.87204	0.0411843	0.507207	0.413429	-0.954679	-0.590636	0.341341	0.549815	0.905267	0.104431	0.305484	0.366039	0.104521	0.305574	0.366129	0.104611	0.305664	0.366219	0.104701	0.305754	0.366309	0.104791	0.305844	0.366399	0.104881	0.305934	0.366489	0.104971	0.306024	0.366579	0.105061	0.306114	0.366669	0.105151	0.306204	0.366759	0.105241	0.306294	0.366849	0.105331	0.306384	0.366939	0.105421	0.306474
ENSG00000169962	TAS1R3	-1.27564	0.420955	1.30621	0.0567645	0.211669	0.86267	0.0395019	0.776541	-0.0627886	-0.900861	0.649178	2.23958	1.54564	1.65334	1.30488	-0.156875	1.65343	1.30497	-0.156785	1.65352	1.30506	-0.156695	1.65361	1.30515	-0.156605	1.6537	1.30524	-0.156515	1.65379	1.30533	-0.156425	1.65388	1.30542	-0.156335	1.65397	1.30551	-0.156245	1.65406	1.3056	-0.156155	1.65415	1.30569	-0.156065	1.65424	1.30578	-0.155975	1.65433	1.30587
ENSG00000107404	DVL1	-1.22096	-0.0654859	-0.452282	0.195636	1.46548	-0.178588	0.229597	0.976796	-4.57107	-0.226787	-0.0710316	0.830646	0.225985	-0.803298	-0.0580912	0.828106	-0.803208	-0.0580012	0.828196	-0.803118	-0.0579112	0.828286	-0.803028	-0.0578212	0.828376	-0.802938	-0.0577312	0.828466	-0.802848	-0.0576412	0.828556	-0.802758	-0.0575512	0.828646	-0.802668	-0.0574612	0.828736	-0.802578	-0.0573712	0.828826	-0.802488	-0.0572812	0.828916	-0.802398	-0.0571912	0.829006	-0.802308	-0.0571012
ENSG00000162576	MXRA8	-0.266177	0.845966	1.06982	0.879263	-0.500001	-0.790641	0.191538	-1.14745	-0.291773	-0.707565	-1.9244	0.397668	-1.14119	-0.205479	-0.957512	-1.8171	-0.205389	-0.957422	-1.81701	-0.205299	-0.957332	-1.81692	-0.205209	-0.957242	-1.81683	-0.205119	-0.957152	-1.81674	-0.205029	-0.957062	-1.81665	-0.204939	-0.956972	-1.81656	-0.204849	-0.956882	-1.81647	-0.204759	-0.956792	-1.81638	-0.204669	-0.956702	-1.81629	-0.204579	-0.956612	-1.8162	-0.204489	-0.956522
ENSG00000175756	AURKAIP1	0.997441	1.32844	1.18171	-0.54489	0.86588	1.62909	0.596579	1.28078	0.843272	0.75895	0.507818	-0.094194	1.20712	1.26748	0.285153	0.964571	1.26757	0.285243	0.964661	1.26766	0.285333	0.964751	1.26775	0.285423	0.964841	1.26784	0.285513	0.964931	1.26793	0.285603	0.965021	1.26802	0.285693	0.965111	1.26811	0.285783	0.965201	1.2682	0.285873	0.965291	1.26829	0.285963	0.965381	1.26838	0.286053	0.965471	1.26847	0.286143
ENSG00000221978	CCNL2	-0.877215	-1.18624	0.331697	0.465665	-1.25919	-0.707969	0.00502133	-1.88943	-1.01082	-1.60772	0.381945	0.580766	-1.49736	-1.42115	-1.95498	-0.588538	-1.42106	-1.95489	-0.588448	-1.42097	-1.9548	-0.588358	-1.42088	-1.95471	-0.588268	-1.42079	-1.95462	-0.588178	-1.4207	-1.95453	-0.588088	-1.42061	-1.95444	-0.587998	-1.42052	-1.95435	-0.587908	-1.42043	-1.95426	-0.587818	-1.42034	-1.95417	-0.587728	-1.42025	-1.95408	-0.587638	-1.42016	-1.95399
ENSG00000224870	MRPL20-AS1	-0.958493	1.29161	0.00533793	-0.856993	-0.314058	-0.300634	-0.149769	-0.289689	-0.941633	-1.28628	0.549761	-1.0049	-0.382734	-1.89996	-1.17117	0.206109	-1.89987	-1.17108	0.206199	-1.89978	-1.17099	0.206289	-1.89969	-1.1709	0.206379	-1.8996	-1.17081	0.206469	-1.89951	-1.17072	0.206559	-1.89942	-1.17063	0.206649	-1.89933	-1.17054	0.206739	-1.89924	-1.17045	0.206829	-1.89915	-1.17036	0.206919	-1.89906	-1.17027	0.207009	-1.89897	-1.17018
ENSG00000242485	MRPL20	1.95789	1.45221	1.22138	-2.45647	-0.193786	0.955375	0.644706	0.67594	1.04132	0.867719	1.08129	-0.254233	0.612942	0.0744154	0.24569	1.09257	0.0745054	0.24578	1.09266	0.0745954	0.24587	1.09275	0.0746854	0.24596	1.09284	0.0747754	0.24605	1.09293	0.0748654	0.24614	1.09302	0.0749554	0.24623	1.09311	0.0750454	0.24632	1.0932	0.0751354	0.24641	1.09329	0.0752254	0.2465	1.09338	0.0753154	0.24659	1.09347	0.0754054	0.24668
ENSG00000160072	ATAD3B	-0.548102	0.636756	-1.91169	1.66544	0.138897	0.970158	0.598297	-0.958005	-0.959661	-0.269202	-0.417074	-2.54241	0.393083	-0.579573	-1.06429	0.553194	-0.579483	-1.0642	0.553284	-0.579393	-1.06411	0.553374	-0.579303	-1.06402	0.553464	-0.579213	-1.06393	0.553554	-0.579123	-1.06384	0.553644	-0.579033	-1.06375	0.553734	-0.578943	-1.06366	0.553824	-0.578853	-1.06357	0.553914	-0.578763	-1.06348	0.554004	-0.578673	-1.06339	0.554094	-0.578583	-1.0633
ENSG00000197785	ATAD3A	-0.266462	0.0544057	1.00543	1.24918	0.378452	1.71669	0.972002	0.565648	-1.91401	1.08979	-0.423678	0.706228	1.95869	0.231641	-2.54906	-0.183431	0.231731	-2.54897	-0.183341	0.231821	-2.54888	-0.183251	0.231911	-2.54879	-0.183161	0.232001	-2.5487	-0.183071	0.232091	-2.54861	-0.182981	0.232181	-2.54852	-0.182891	0.232271	-2.54843	-0.182801	0.232361	-2.54834	-0.182711	0.232451	-2.54825	-0.182621	0.232541	-2.54816	-0.182531	0.232631	-2.54807
ENSG00000215014	NA	0.681714	-0.0249649	0.884801	-0.281153	-0.425628	1.14486	0.461258	1.16333	0.65829	0.46713	0.537004	-0.0465597	0.613782	1.06829	0.69633	-0.187054	1.06838	0.69642	-0.186964	1.06847	0.69651	-0.186874	1.06856	0.6966	-0.186784	1.06865	0.69669	-0.186694	1.06874	0.69678	-0.186604	1.06883	0.69687	-0.186514	1.06892	0.69696	-0.186424	1.06901	0.69705	-0.186334	1.0691	0.69714	-0.186244	1.06919	0.69723	-0.186154	1.06928	0.69732
ENSG00000228594	FNDC10	-0.654491	1.45477	0.693973	0.56757	1.35147	0.200162	0.765432	-0.0782456	-3.84159	-0.103546	0.851687	0.21096	0.307979	-1.28639	-1.15915	0.383863	-1.2863	-1.15906	0.383953	-1.28621	-1.15897	0.384043	-1.28612	-1.15888	0.384133	-1.28603	-1.15879	0.384223	-1.28594	-1.1587	0.384313	-1.28585	-1.15861	0.384403	-1.28576	-1.15852	0.384493	-1.28567	-1.15843	0.384583	-1.28558	-1.15834	0.384673	-1.28549	-1.15825	0.384763	-1.2854	-1.15816
ENSG00000272106	NA	-1.24396	-1.13776	-0.762329	0.899318	-1.05464	-0.723912	-0.962888	-1.00914	-2.15503	0.7084	-0.36106	1.77467	0.158149	0.760322	-0.752866	-0.666542	0.760412	-0.752776	-0.666452	0.760502	-0.752686	-0.666362	0.760592	-0.752596	-0.666272	0.760682	-0.752506	-0.666182	0.760772	-0.752416	-0.666092	0.760862	-0.752326	-0.666002	0.760952	-0.752236	-0.665912	0.761042	-0.752146	-0.665822	0.761132	-0.752056	-0.665732	0.761222	-0.751966	-0.665642	0.761312	-0.751876
ENSG00000189339	SLC35E2B	-2.07843	-0.91327	0.60152	0.21371	-0.539019	-0.316932	0.0999082	-0.102339	-1.19328	-1.09613	0.535673	-0.162544	-0.0732055	-2.62705	-0.145838	-0.00648378	-2.62696	-0.145748	-0.00639378	-2.62687	-0.145658	-0.00630378	-2.62678	-0.145568	-0.00621378	-2.62669	-0.145478	-0.00612378	-2.6266	-0.145388	-0.00603378	-2.62651	-0.145298	-0.00594378	-2.62642	-0.145208	-0.00585378	-2.62633	-0.145118	-0.00576378	-2.62624	-0.145028	-0.00567378	-2.62615	-0.144938	-0.00558378	-2.62606	-0.144848
ENSG00000008128	CDK11A	1.3018	1.18085	0.912704	0.741909	1.29689	-0.399686	0.426965	0.659301	-0.292921	-0.0967737	0.134066	1.12961	-0.136288	-1.36478	0.0918283	0.144367	-1.36469	0.0919183	0.144457	-1.3646	0.0920083	0.144547	-1.36451	0.0920983	0.144637	-1.36442	0.0921883	0.144727	-1.36433	0.0922783	0.144817	-1.36424	0.0923683	0.144907	-1.36415	0.0924583	0.144997	-1.36406	0.0925483	0.145087	-1.36397	0.0926383	0.145177	-1.36388	0.0927283	0.145267	-1.36379	0.0928183
ENSG00000268575	NA	0.548193	-0.840501	1.17542	0.0777077	-0.367146	-1.43729	0.79987	-0.0955652	-1.45772	-0.763812	-0.00318871	1.90518	-0.451549	-0.584929	0.614396	-0.268143	-0.584839	0.614486	-0.268053	-0.584749	0.614576	-0.267963	-0.584659	0.614666	-0.267873	-0.584569	0.614756	-0.267783	-0.584479	0.614846	-0.267693	-0.584389	0.614936	-0.267603	-0.584299	0.615026	-0.267513	-0.584209	0.615116	-0.267423	-0.584119	0.615206	-0.267333	-0.584029	0.615296	-0.267243	-0.583939	0.615386
ENSG00000215790	SLC35E2A	1.17278	-0.518444	-0.26615	0.16396	-0.835535	-1.60385	-0.918242	-1.20751	-1.25519	-0.111697	0.0922832	-0.314308	-1.00934	-0.886311	-0.552606	0.115299	-0.886221	-0.552516	0.115389	-0.886131	-0.552426	0.115479	-0.886041	-0.552336	0.115569	-0.885951	-0.552246	0.115659	-0.885861	-0.552156	0.115749	-0.885771	-0.552066	0.115839	-0.885681	-0.551976	0.115929	-0.885591	-0.551886	0.116019	-0.885501	-0.551796	0.116109	-0.885411	-0.551706	0.116199	-0.885321	-0.551616
ENSG00000008130	NADK	-0.983727	0.244793	-1.28015	-3.21585	0.352776	-0.758869	-0.0622478	1.94282	2.05493	-0.184823	-0.840043	-0.773089	0.810975	-0.323752	0.65587	-0.232891	-0.323662	0.65596	-0.232801	-0.323572	0.65605	-0.232711	-0.323482	0.65614	-0.232621	-0.323392	0.65623	-0.232531	-0.323302	0.65632	-0.232441	-0.323212	0.65641	-0.232351	-0.323122	0.6565	-0.232261	-0.323032	0.65659	-0.232171	-0.322942	0.65668	-0.232081	-0.322852	0.65677	-0.231991	-0.322762	0.65686
ENSG00000067606	PRKCZ	0.396225	0.225107	-0.759028	0.588263	-0.121198	0.349805	0.397871	-2.24223	-1.57857	-0.935813	0.342853	0.751697	-1.46191	-1.37627	-3.00926	0.590379	-1.37618	-3.00917	0.590469	-1.37609	-3.00908	0.590559	-1.376	-3.00899	0.590649	-1.37591	-3.0089	0.590739	-1.37582	-3.00881	0.590829	-1.37573	-3.00872	0.590919	-1.37564	-3.00863	0.591009	-1.37555	-3.00854	0.591099	-1.37546	-3.00845	0.591189	-1.37537	-3.00836	0.591279	-1.37528	-3.00827
ENSG00000157933	SKI	1.82861	-1.10652	-0.040429	2.70102	0.111022	0.253512	0.0799825	-0.506513	-1.55608	-1.52105	-0.0588154	-0.018888	0.178248	0.15368	-0.328992	-1.73137	0.15377	-0.328902	-1.73128	0.15386	-0.328812	-1.73119	0.15395	-0.328722	-1.7311	0.15404	-0.328632	-1.73101	0.15413	-0.328542	-1.73092	0.15422	-0.328452	-1.73083	0.15431	-0.328362	-1.73074	0.1544	-0.328272	-1.73065	0.15449	-0.328182	-1.73056	0.15458	-0.328092	-1.73047	0.15467	-0.328002
ENSG00000116151	MORN1	0.562319	-1.36037	0.747819	0.823889	-0.342308	-0.896446	-0.0184315	-2.25878	-0.610045	-1.03735	0.468996	2.04704	-0.962689	-1.34018	-1.0954	-0.834055	-1.34009	-1.09531	-0.833965	-1.34	-1.09522	-0.833875	-1.33991	-1.09513	-0.833785	-1.33982	-1.09504	-0.833695	-1.33973	-1.09495	-0.833605	-1.33964	-1.09486	-0.833515	-1.33955	-1.09477	-0.833425	-1.33946	-1.09468	-0.833335	-1.33937	-1.09459	-0.833245	-1.33928	-1.0945	-0.833155	-1.33919	-1.09441
ENSG00000157911	PEX10	-1.77037	0.66155	0.851328	0.677029	1.39845	0.275836	0.237386	-0.15994	0.989843	0.254261	-1.46863	0.591595	1.96141	-0.0228919	-1.5828	-0.197796	-0.0228019	-1.58271	-0.197706	-0.0227119	-1.58262	-0.197616	-0.0226219	-1.58253	-0.197526	-0.0225319	-1.58244	-0.197436	-0.0224419	-1.58235	-0.197346	-0.0223519	-1.58226	-0.197256	-0.0222619	-1.58217	-0.197166	-0.0221719	-1.58208	-0.197076	-0.0220819	-1.58199	-0.196986	-0.0219919	-1.5819	-0.196896	-0.0219019	-1.58181
ENSG00000149527	PLCH2	-0.875994	0.565296	0.577437	0.0713746	0.478593	0.9628	0.794106	-1.57306	-2.36686	-1.79705	0.407909	0.967232	0.0513432	-2.38563	-1.68816	-0.464443	-2.38554	-1.68807	-0.464353	-2.38545	-1.68798	-0.464263	-2.38536	-1.68789	-0.464173	-2.38527	-1.6878	-0.464083	-2.38518	-1.68771	-0.463993	-2.38509	-1.68762	-0.463903	-2.385	-1.68753	-0.463813	-2.38491	-1.68744	-0.463723	-2.38482	-1.68735	-0.463633	-2.38473	-1.68726	-0.463543	-2.38464	-1.68717
ENSG00000157881	PANK4	-0.0216489	0.754714	0.116524	-2.01152	-0.827237	-1.36659	0.13622	-0.258877	1.14823	-0.855413	0.545369	0.192351	-0.99144	-0.890511	-0.399489	0.569058	-0.890421	-0.399399	0.569148	-0.890331	-0.399309	0.569238	-0.890241	-0.399219	0.569328	-0.890151	-0.399129	0.569418	-0.890061	-0.399039	0.569508	-0.889971	-0.398949	0.569598	-0.889881	-0.398859	0.569688	-0.889791	-0.398769	0.569778	-0.889701	-0.398679	0.569868	-0.889611	-0.398589	0.569958	-0.889521	-0.398499
ENSG00000272449	NA	-0.0798584	0.336793	-0.789058	0.735995	0.438797	-0.179938	0.517992	-1.36551	-2.22188	-1.01687	-0.159001	0.0528369	-0.729004	-2.0658	-0.92754	-0.0841087	-2.06571	-0.92745	-0.0840187	-2.06562	-0.92736	-0.0839287	-2.06553	-0.92727	-0.0838387	-2.06544	-0.92718	-0.0837487	-2.06535	-0.92709	-0.0836587	-2.06526	-0.927	-0.0835687	-2.06517	-0.92691	-0.0834787	-2.06508	-0.92682	-0.0833887	-2.06499	-0.92673	-0.0832987	-2.0649	-0.92664	-0.0832087	-2.06481	-0.92655
ENSG00000238164	NA	-0.59341	0.777908	-0.276676	0.377387	0.37375	-0.950293	0.525957	-0.693399	-1.25222	-0.808698	0.227469	0.425944	-0.953933	-3.78999	-0.901193	0.0848342	-3.7899	-0.901103	0.0849242	-3.78981	-0.901013	0.0850142	-3.78972	-0.900923	0.0851042	-3.78963	-0.900833	0.0851942	-3.78954	-0.900743	0.0852842	-3.78945	-0.900653	0.0853742	-3.78936	-0.900563	0.0854642	-3.78927	-0.900473	0.0855542	-3.78918	-0.900383	0.0856442	-3.78909	-0.900293	0.0857342	-3.789	-0.900203
ENSG00000157870	PRXL2B	-1.40427	-2.53458	-0.501004	0.591801	1.91261	0.104239	0.226467	-2.4135	-1.12321	-0.846258	-0.0174387	1.07391	0.881213	-1.13993	-0.985692	0.34492	-1.13984	-0.985602	0.34501	-1.13975	-0.985512	0.3451	-1.13966	-0.985422	0.34519	-1.13957	-0.985332	0.34528	-1.13948	-0.985242	0.34537	-1.13939	-0.985152	0.34546	-1.1393	-0.985062	0.34555	-1.13921	-0.984972	0.34564	-1.13912	-0.984882	0.34573	-1.13903	-0.984792	0.34582	-1.13894	-0.984702
ENSG00000162591	MEGF6	-0.712362	-0.635118	0.0176305	0.306322	0.0954122	-1.28095	0.74756	-1.70079	-2.36936	-0.918991	0.135677	1.28933	-0.543274	-1.80714	-2.19939	-0.417861	-1.80705	-2.1993	-0.417771	-1.80696	-2.19921	-0.417681	-1.80687	-2.19912	-0.417591	-1.80678	-2.19903	-0.417501	-1.80669	-2.19894	-0.417411	-1.8066	-2.19885	-0.417321	-1.80651	-2.19876	-0.417231	-1.80642	-2.19867	-0.417141	-1.80633	-2.19858	-0.417051	-1.80624	-2.19849	-0.416961	-1.80615	-2.1984
ENSG00000158109	TPRG1L	0.388772	-0.181375	-0.60936	0.112563	0.456341	-0.274532	0.287864	-1.05492	-3.0968	-0.970098	-0.176781	1.82345	-1.18243	-0.989591	-1.26774	0.365834	-0.989501	-1.26765	0.365924	-0.989411	-1.26756	0.366014	-0.989321	-1.26747	0.366104	-0.989231	-1.26738	0.366194	-0.989141	-1.26729	0.366284	-0.989051	-1.2672	0.366374	-0.988961	-1.26711	0.366464	-0.988871	-1.26702	0.366554	-0.988781	-1.26693	0.366644	-0.988691	-1.26684	0.366734	-0.988601	-1.26675
ENSG00000078900	TP73	0.0281486	0.202832	1.48646	0.813472	0.906003	0.634563	-0.068213	1.03735	0.423812	0.559224	0.478484	1.7515	0.928232	1.40497	0.619218	0.810636	1.40506	0.619308	0.810726	1.40515	0.619398	0.810816	1.40524	0.619488	0.810906	1.40533	0.619578	0.810996	1.40542	0.619668	0.811086	1.40551	0.619758	0.811176	1.4056	0.619848	0.811266	1.40569	0.619938	0.811356	1.40578	0.620028	0.811446	1.40587	0.620118	0.811536	1.40596	0.620208
ENSG00000227372	TP73-AS1	-1.65927	-0.872604	0.120574	0.861326	-0.694315	-0.953153	0.604304	-1.06196	-1.28169	-1.68287	-0.74109	0.747367	1.19046	-2.09775	-0.541122	-2.08719	-2.09766	-0.541032	-2.0871	-2.09757	-0.540942	-2.08701	-2.09748	-0.540852	-2.08692	-2.09739	-0.540762	-2.08683	-2.0973	-0.540672	-2.08674	-2.09721	-0.540582	-2.08665	-2.09712	-0.540492	-2.08656	-2.09703	-0.540402	-2.08647	-2.09694	-0.540312	-2.08638	-2.09685	-0.540222	-2.08629	-2.09676	-0.540132
ENSG00000198912	C1orf174	2.81225	0.953084	-0.368866	-1.43742	-0.265103	1.3696	0.400827	-0.825948	0.336007	-1.59535	0.550566	-0.656515	-0.90105	-1.69674	-0.784224	-0.872619	-1.69665	-0.784134	-0.872529	-1.69656	-0.784044	-0.872439	-1.69647	-0.783954	-0.872349	-1.69638	-0.783864	-0.872259	-1.69629	-0.783774	-0.872169	-1.6962	-0.783684	-0.872079	-1.69611	-0.783594	-0.871989	-1.69602	-0.783504	-0.871899	-1.69593	-0.783414	-0.871809	-1.69584	-0.783324	-0.871719	-1.69575	-0.783234
ENSG00000131697	NPHP4	-1.80628	-1.9657	0.0695665	-0.462674	1.61671	0.827964	0.653685	-0.285078	-0.554646	-0.632348	-1.22042	-0.301288	0.336024	-0.635447	-0.318048	-0.234607	-0.635357	-0.317958	-0.234517	-0.635267	-0.317868	-0.234427	-0.635177	-0.317778	-0.234337	-0.635087	-0.317688	-0.234247	-0.634997	-0.317598	-0.234157	-0.634907	-0.317508	-0.234067	-0.634817	-0.317418	-0.233977	-0.634727	-0.317328	-0.233887	-0.634637	-0.317238	-0.233797	-0.634547	-0.317148	-0.233707	-0.634457	-0.317058
ENSG00000069424	KCNAB2	-1.9906	-0.816204	-0.359589	-0.0355245	1.09573	1.03522	-0.265249	0.0112895	-2.40628	-0.942327	-0.371426	0.99822	1.36349	-0.438089	-0.932105	-0.635077	-0.437999	-0.932015	-0.634987	-0.437909	-0.931925	-0.634897	-0.437819	-0.931835	-0.634807	-0.437729	-0.931745	-0.634717	-0.437639	-0.931655	-0.634627	-0.437549	-0.931565	-0.634537	-0.437459	-0.931475	-0.634447	-0.437369	-0.931385	-0.634357	-0.437279	-0.931295	-0.634267	-0.437189	-0.931205	-0.634177	-0.437099	-0.931115
ENSG00000116251	RPL22	1.48861	-1.12309	-0.427513	0.875706	0.324919	0.310735	-8.06647e-05	-2.21378	-1.20547	-0.128745	0.131055	-0.0292493	0.71155	-1.96767	-2.79648	0.361995	-1.96758	-2.79639	0.362085	-1.96749	-2.7963	0.362175	-1.9674	-2.79621	0.362265	-1.96731	-2.79612	0.362355	-1.96722	-2.79603	0.362445	-1.96713	-2.79594	0.362535	-1.96704	-2.79585	0.362625	-1.96695	-2.79576	0.362715	-1.96686	-2.79567	0.362805	-1.96677	-2.79558	0.362895	-1.96668	-2.79549
ENSG00000158286	RNF207	0.117158	0.0664298	1.02174	0.212072	0.95835	-1.21999	-0.571854	-2.39301	-2.83149	-1.59871	-0.167175	0.0757389	0.383344	-0.00960205	-1.40589	-0.663712	-0.00951205	-1.4058	-0.663622	-0.00942205	-1.40571	-0.663532	-0.00933205	-1.40562	-0.663442	-0.00924205	-1.40553	-0.663352	-0.00915205	-1.40544	-0.663262	-0.00906205	-1.40535	-0.663172	-0.00897205	-1.40526	-0.663082	-0.00888205	-1.40517	-0.662992	-0.00879205	-1.40508	-0.662902	-0.00870205	-1.40499	-0.662812	-0.00861205	-1.4049
ENSG00000116237	ICMT	0.447297	0.825547	0.561822	-1.48163	0.0449761	1.50358	0.595996	1.28078	1.80888	1.29187	0.530605	-0.711549	1.43103	0.815349	-0.986282	0.14956	0.815439	-0.986192	0.14965	0.815529	-0.986102	0.14974	0.815619	-0.986012	0.14983	0.815709	-0.985922	0.14992	0.815799	-0.985832	0.15001	0.815889	-0.985742	0.1501	0.815979	-0.985652	0.15019	0.816069	-0.985562	0.15028	0.816159	-0.985472	0.15037	0.816249	-0.985382	0.15046	0.816339	-0.985292
ENSG00000158292	GPR153	-0.621007	0.0073018	-1.40501	-1.05243	0.985571	0.64313	1.47332	-0.664917	-2.18184	-1.3389	0.713561	0.894696	0.706863	-2.4324	0.597604	0.513788	-2.43231	0.597694	0.513878	-2.43222	0.597784	0.513968	-2.43213	0.597874	0.514058	-2.43204	0.597964	0.514148	-2.43195	0.598054	0.514238	-2.43186	0.598144	0.514328	-2.43177	0.598234	0.514418	-2.43168	0.598324	0.514508	-2.43159	0.598414	0.514598	-2.4315	0.598504	0.514688	-2.43141	0.598594
ENSG00000097021	ACOT7	0.458871	0.960677	0.90293	0.865958	0.387924	1.76064	0.68099	0.0223225	0.557662	1.73477	0.705046	0.568513	1.46168	1.02717	0.993507	1.36711	1.02726	0.993597	1.3672	1.02735	0.993687	1.36729	1.02744	0.993777	1.36738	1.02753	0.993867	1.36747	1.02762	0.993957	1.36756	1.02771	0.994047	1.36765	1.0278	0.994137	1.36774	1.02789	0.994227	1.36783	1.02798	0.994317	1.36792	1.02807	0.994407	1.36801	1.02816	0.994497
ENSG00000187017	ESPN	-0.807297	1.11309	1.18291	0.311663	0.293001	-0.1488	-0.499976	-3.0988	-2.12936	-0.77184	0.274751	-0.804442	0.222335	1.06439	-1.80546	0.0663258	1.06448	-1.80537	0.0664158	1.06457	-1.80528	0.0665058	1.06466	-1.80519	0.0665958	1.06475	-1.8051	0.0666858	1.06484	-1.80501	0.0667758	1.06493	-1.80492	0.0668658	1.06502	-1.80483	0.0669558	1.06511	-1.80474	0.0670458	1.0652	-1.80465	0.0671358	1.06529	-1.80456	0.0672258	1.06538	-1.80447
ENSG00000215788	TNFRSF25	0.605628	0.525342	0.0979163	0.715361	-0.101861	0.160902	0.196415	-2.91444	-1.50823	-0.901022	-0.15674	-0.0355522	-0.660029	-1.2951	-3.00091	-0.515224	-1.29501	-3.00082	-0.515134	-1.29492	-3.00073	-0.515044	-1.29483	-3.00064	-0.514954	-1.29474	-3.00055	-0.514864	-1.29465	-3.00046	-0.514774	-1.29456	-3.00037	-0.514684	-1.29447	-3.00028	-0.514594	-1.29438	-3.00019	-0.514504	-1.29429	-3.0001	-0.514414	-1.2942	-3.00001	-0.514324	-1.29411	-2.99992
ENSG00000171680	PLEKHG5	0.355436	-0.19714	0.510276	1.15169	-0.314655	0.391822	-0.0644332	-2.21966	-1.26042	-3.86248	0.288509	0.519664	-1.02299	0.252926	-0.850324	-0.764949	0.253016	-0.850234	-0.764859	0.253106	-0.850144	-0.764769	0.253196	-0.850054	-0.764679	0.253286	-0.849964	-0.764589	0.253376	-0.849874	-0.764499	0.253466	-0.849784	-0.764409	0.253556	-0.849694	-0.764319	0.253646	-0.849604	-0.764229	0.253736	-0.849514	-0.764139	0.253826	-0.849424	-0.764049	0.253916	-0.849334
ENSG00000162413	KLHL21	-1.29397	-1.37747	-0.558452	1.94292	-0.0585221	-0.209295	0.226799	-0.630352	-1.83619	-1.36493	-0.703389	-0.452559	0.0133208	-1.48368	-2.27689	-0.889428	-1.48359	-2.2768	-0.889338	-1.4835	-2.27671	-0.889248	-1.48341	-2.27662	-0.889158	-1.48332	-2.27653	-0.889068	-1.48323	-2.27644	-0.888978	-1.48314	-2.27635	-0.888888	-1.48305	-2.27626	-0.888798	-1.48296	-2.27617	-0.888708	-1.48287	-2.27608	-0.888618	-1.48278	-2.27599	-0.888528	-1.48269	-2.2759
ENSG00000116273	PHF13	-2.18976	-0.0443982	-0.688934	1.3426	1.07211	0.024657	0.891454	-1.37009	-0.59159	-0.304311	-0.568834	2.41652	-0.196814	-0.289083	0.0622635	0.069471	-0.288993	0.0623535	0.069561	-0.288903	0.0624435	0.069651	-0.288813	0.0625335	0.069741	-0.288723	0.0626235	0.069831	-0.288633	0.0627135	0.069921	-0.288543	0.0628035	0.070011	-0.288453	0.0628935	0.070101	-0.288363	0.0629835	0.070191	-0.288273	0.0630735	0.070281	-0.288183	0.0631635	0.070371	-0.288093	0.0632535
ENSG00000041988	THAP3	1.81552	1.7545	-0.618684	-0.509481	-0.367949	-0.572577	0.899555	-0.187655	0.288474	-0.830435	0.273839	-0.817567	-1.77911	-1.15952	-1.53535	-0.300415	-1.15943	-1.53526	-0.300325	-1.15934	-1.53517	-0.300235	-1.15925	-1.53508	-0.300145	-1.15916	-1.53499	-0.300055	-1.15907	-1.5349	-0.299965	-1.15898	-1.53481	-0.299875	-1.15889	-1.53472	-0.299785	-1.1588	-1.53463	-0.299695	-1.15871	-1.53454	-0.299605	-1.15862	-1.53445	-0.299515	-1.15853	-1.53436
ENSG00000049245	VAMP3	-0.536693	-0.923895	-1.41133	-2.04035	0.527207	1.02668	0.321371	2.20625	0.151117	0.333236	-0.654947	-0.105828	0.893575	1.45506	-0.283092	-1.04425	1.45515	-0.283002	-1.04416	1.45524	-0.282912	-1.04407	1.45533	-0.282822	-1.04398	1.45542	-0.282732	-1.04389	1.45551	-0.282642	-1.0438	1.4556	-0.282552	-1.04371	1.45569	-0.282462	-1.04362	1.45578	-0.282372	-1.04353	1.45587	-0.282282	-1.04344	1.45596	-0.282192	-1.04335	1.45605	-0.282102
ENSG00000049246	PER3	-1.06886	-1.49824	0.242503	-0.849199	-1.26392	-0.541243	0.684488	-1.52688	0.218422	-1.32043	0.604511	0.777325	-0.828341	-1.42185	-1.0978	-1.32007	-1.42176	-1.09771	-1.31998	-1.42167	-1.09762	-1.31989	-1.42158	-1.09753	-1.3198	-1.42149	-1.09744	-1.31971	-1.4214	-1.09735	-1.31962	-1.42131	-1.09726	-1.31953	-1.42122	-1.09717	-1.31944	-1.42113	-1.09708	-1.31935	-1.42104	-1.09699	-1.31926	-1.42095	-1.0969	-1.31917	-1.42086	-1.09681
ENSG00000049249	TNFRSF9	0.106533	-1.17029	0.294518	0.0813559	0.225502	-0.0821307	-0.489852	-0.118571	-3.22649	0.944836	-0.100306	0.73056	-1.36929	-1.50972	-1.84512	0.44773	-1.50963	-1.84503	0.44782	-1.50954	-1.84494	0.44791	-1.50945	-1.84485	0.448	-1.50936	-1.84476	0.44809	-1.50927	-1.84467	0.44818	-1.50918	-1.84458	0.44827	-1.50909	-1.84449	0.44836	-1.509	-1.8444	0.44845	-1.50891	-1.84431	0.44854	-1.50882	-1.84422	0.44863	-1.50873	-1.84413
ENSG00000116288	PARK7	0.788061	0.50942	0.830789	-0.270967	0.500188	1.36614	0.332189	1.04243	0.595841	1.69706	0.949801	0.0680289	1.33645	1.59307	0.440717	1.55282	1.59316	0.440807	1.55291	1.59325	0.440897	1.553	1.59334	0.440987	1.55309	1.59343	0.441077	1.55318	1.59352	0.441167	1.55327	1.59361	0.441257	1.55336	1.5937	0.441347	1.55345	1.59379	0.441437	1.55354	1.59388	0.441527	1.55363	1.59397	0.441617	1.55372	1.59406	0.441707
ENSG00000116285	ERRFI1	-0.375301	-0.622407	-0.322488	1.38934	-0.641262	-0.704063	-0.381762	-0.598015	0.0299877	-0.243984	0.139806	-0.423048	-0.705565	-0.302914	-0.282167	-0.670772	-0.302824	-0.282077	-0.670682	-0.302734	-0.281987	-0.670592	-0.302644	-0.281897	-0.670502	-0.302554	-0.281807	-0.670412	-0.302464	-0.281717	-0.670322	-0.302374	-0.281627	-0.670232	-0.302284	-0.281537	-0.670142	-0.302194	-0.281447	-0.670052	-0.302104	-0.281357	-0.669962	-0.302014	-0.281267	-0.669872	-0.301924	-0.281177
ENSG00000074800	ENO1	-0.329678	-0.347224	-0.216312	-0.670661	0.63588	1.34624	0.410928	1.15798	1.84957	0.946583	-0.144957	0.0870658	2.13485	2.9853	-0.0856771	0.187286	2.98539	-0.0855871	0.187376	2.98548	-0.0854971	0.187466	2.98557	-0.0854071	0.187556	2.98566	-0.0853171	0.187646	2.98575	-0.0852271	0.187736	2.98584	-0.0851371	0.187826	2.98593	-0.0850471	0.187916	2.98602	-0.0849571	0.188006	2.98611	-0.0848671	0.188096	2.9862	-0.0847771	0.188186	2.98629	-0.0846871
ENSG00000131686	CA6	0.990489	-0.11301	0.292461	2.2621	-1.42684	0.667079	-0.726817	-1.7407	-1.63383	-0.747312	0.780946	0.423881	-0.986072	-0.352399	-0.92887	-1.19416	-0.352309	-0.92878	-1.19407	-0.352219	-0.92869	-1.19398	-0.352129	-0.9286	-1.19389	-0.352039	-0.92851	-1.1938	-0.351949	-0.92842	-1.19371	-0.351859	-0.92833	-1.19362	-0.351769	-0.92824	-1.19353	-0.351679	-0.92815	-1.19344	-0.351589	-0.92806	-1.19335	-0.351499	-0.92797	-1.19326	-0.351409	-0.92788
ENSG00000142583	SLC2A5	0.0527633	0.684882	2.43571	0.774093	0.409773	2.12043	1.04717	1.29154	0.362532	0.374797	0.558327	0.117511	0.13835	0.853276	0.382201	0.60429	0.853366	0.382291	0.60438	0.853456	0.382381	0.60447	0.853546	0.382471	0.60456	0.853636	0.382561	0.60465	0.853726	0.382651	0.60474	0.853816	0.382741	0.60483	0.853906	0.382831	0.60492	0.853996	0.382921	0.60501	0.854086	0.383011	0.6051	0.854176	0.383101	0.60519	0.854266	0.383191
ENSG00000180758	GPR157	-0.560431	-1.862	-0.171917	0.439037	-0.399723	-1.30972	0.544239	0.00293155	-1.05454	-1.35798	0.174419	1.41475	-0.957631	0.81154	-1.63068	-1.25166	0.81163	-1.63059	-1.25157	0.81172	-1.6305	-1.25148	0.81181	-1.63041	-1.25139	0.8119	-1.63032	-1.2513	0.81199	-1.63023	-1.25121	0.81208	-1.63014	-1.25112	0.81217	-1.63005	-1.25103	0.81226	-1.62996	-1.25094	0.81235	-1.62987	-1.25085	0.81244	-1.62978	-1.25076	0.81253	-1.62969
ENSG00000049239	H6PD	-2.51479	-2.13696	-1.22492	-0.570838	-0.00398094	-0.0319129	0.760253	0.354616	-0.532577	0.377912	-2.12494	0.0636838	0.602988	-1.03646	-0.522752	0.0628255	-1.03637	-0.522662	0.0629155	-1.03628	-0.522572	0.0630055	-1.03619	-0.522482	0.0630955	-1.0361	-0.522392	0.0631855	-1.03601	-0.522302	0.0632755	-1.03592	-0.522212	0.0633655	-1.03583	-0.522122	0.0634555	-1.03574	-0.522032	0.0635455	-1.03565	-0.521942	0.0636355	-1.03556	-0.521852	0.0637255	-1.03547	-0.521762
ENSG00000171621	SPSB1	-1.54835	2.00316	0.521486	1.89011	-0.511244	0.925652	0.689762	-0.244908	1.12141	1.02077	0.0836824	0.0169759	0.472113	1.1463	0.723337	0.544244	1.14639	0.723427	0.544334	1.14648	0.723517	0.544424	1.14657	0.723607	0.544514	1.14666	0.723697	0.544604	1.14675	0.723787	0.544694	1.14684	0.723877	0.544784	1.14693	0.723967	0.544874	1.14702	0.724057	0.544964	1.14711	0.724147	0.545054	1.1472	0.724237	0.545144	1.14729	0.724327
ENSG00000171612	SLC25A33	-0.420491	-0.237687	-0.36133	1.69836	0.457994	0.809977	0.860816	-0.849327	-0.53231	-0.36018	-1.13109	0.44837	1.29273	0.246637	-1.33013	-0.75797	0.246727	-1.33004	-0.75788	0.246817	-1.32995	-0.75779	0.246907	-1.32986	-0.7577	0.246997	-1.32977	-0.75761	0.247087	-1.32968	-0.75752	0.247177	-1.32959	-0.75743	0.247267	-1.3295	-0.75734	0.247357	-1.32941	-0.75725	0.247447	-1.32932	-0.75716	0.247537	-1.32923	-0.75707	0.247627	-1.32914
ENSG00000188807	TMEM201	-1.83905	0.506811	-0.348946	1.553	0.381509	0.727519	0.571027	-1.71575	-2.30816	-0.465183	-0.996582	-0.602099	1.89364	0.186068	-1.53586	0.42558	0.186158	-1.53577	0.42567	0.186248	-1.53568	0.42576	0.186338	-1.53559	0.42585	0.186428	-1.5355	0.42594	0.186518	-1.53541	0.42603	0.186608	-1.53532	0.42612	0.186698	-1.53523	0.42621	0.186788	-1.53514	0.4263	0.186878	-1.53505	0.42639	0.186968	-1.53496	0.42648	0.187058	-1.53487
ENSG00000171608	PIK3CD	-2.77097	-1.65962	-1.20597	-0.0666887	-0.21137	-0.830682	0.0823951	-0.352864	-1.0744	-1.14982	-0.555041	-0.576054	-0.0937309	-1.26292	-0.842019	-0.504996	-1.26283	-0.841929	-0.504906	-1.26274	-0.841839	-0.504816	-1.26265	-0.841749	-0.504726	-1.26256	-0.841659	-0.504636	-1.26247	-0.841569	-0.504546	-1.26238	-0.841479	-0.504456	-1.26229	-0.841389	-0.504366	-1.2622	-0.841299	-0.504276	-1.26211	-0.841209	-0.504186	-1.26202	-0.841119	-0.504096	-1.26193	-0.841029
ENSG00000179840	PIK3CD-AS1	-0.209401	-0.040015	0.828426	-0.372572	0.531808	-1.64323	-1.75429	0.363452	1.02376	-0.0381613	-0.139801	0.779606	-0.868041	-1.92494	0.165272	0.0484256	-1.92485	0.165362	0.0485156	-1.92476	0.165452	0.0486056	-1.92467	0.165542	0.0486956	-1.92458	0.165632	0.0487856	-1.92449	0.165722	0.0488756	-1.9244	0.165812	0.0489656	-1.92431	0.165902	0.0490556	-1.92422	0.165992	0.0491456	-1.92413	0.166082	0.0492356	-1.92404	0.166172	0.0493256	-1.92395	0.166262
ENSG00000178585	CTNNBIP1	-1.5683	-0.498903	-1.15438	0.35757	1.83537	0.52567	0.125823	0.621492	-0.487946	-0.159935	-1.71566	0.392098	1.69505	0.840701	0.157065	0.650316	0.840791	0.157155	0.650406	0.840881	0.157245	0.650496	0.840971	0.157335	0.650586	0.841061	0.157425	0.650676	0.841151	0.157515	0.650766	0.841241	0.157605	0.650856	0.841331	0.157695	0.650946	0.841421	0.157785	0.651036	0.841511	0.157875	0.651126	0.841601	0.157965	0.651216	0.841691	0.158055
ENSG00000162441	LZIC	0.970171	0.950732	0.470811	-1.23261	-0.216637	1.62674	0.460704	1.57425	0.735592	1.90517	1.2643	-0.526734	0.364196	0.119707	0.221728	1.42791	0.119797	0.221818	1.428	0.119887	0.221908	1.42809	0.119977	0.221998	1.42818	0.120067	0.222088	1.42827	0.120157	0.222178	1.42836	0.120247	0.222268	1.42845	0.120337	0.222358	1.42854	0.120427	0.222448	1.42863	0.120517	0.222538	1.42872	0.120607	0.222628	1.42881	0.120697	0.222718
ENSG00000173614	NMNAT1	0.558459	-0.616159	-0.885169	-1.75215	-1.3951	0.208069	-1.20086	1.82761	0.656248	0.331871	0.531272	-1.64139	-0.647957	0.00748488	0.924531	0.617939	0.00757488	0.924621	0.618029	0.00766488	0.924711	0.618119	0.00775488	0.924801	0.618209	0.00784488	0.924891	0.618299	0.00793488	0.924981	0.618389	0.00802488	0.925071	0.618479	0.00811488	0.925161	0.618569	0.00820488	0.925251	0.618659	0.00829488	0.925341	0.618749	0.00838488	0.925431	0.618839	0.00847488	0.925521
ENSG00000162444	RBP7	-0.590666	-1.92835	-1.21328	-2.32329	0.974375	-0.230908	0.0666613	1.29832	1.15567	0.53662	0.186297	-0.0233696	1.85064	-1.09527	0.11446	0.215727	-1.09518	0.11455	0.215817	-1.09509	0.11464	0.215907	-1.095	0.11473	0.215997	-1.09491	0.11482	0.216087	-1.09482	0.11491	0.216177	-1.09473	0.115	0.216267	-1.09464	0.11509	0.216357	-1.09455	0.11518	0.216447	-1.09446	0.11527	0.216537	-1.09437	0.11536	0.216627	-1.09428	0.11545
ENSG00000130939	UBE4B	-1.86636	-3.78253	-1.1294	-0.303807	-0.0930321	-0.664368	0.10529	-0.478422	-1.63074	-0.570825	0.516235	0.42314	0.753424	0.448008	0.98634	-0.049243	0.448098	0.98643	-0.049153	0.448188	0.98652	-0.049063	0.448278	0.98661	-0.048973	0.448368	0.9867	-0.048883	0.448458	0.98679	-0.048793	0.448548	0.98688	-0.048703	0.448638	0.98697	-0.048613	0.448728	0.98706	-0.048523	0.448818	0.98715	-0.048433	0.448908	0.98724	-0.048343	0.448998	0.98733
ENSG00000054523	KIF1B	-1.4136	-1.8039	-0.810389	0.231516	0.111324	0.62873	0.807333	1.1156	2.46864	-0.154902	-1.06771	-0.145182	0.833607	1.42846	2.2386	-0.321703	1.42855	2.23869	-0.321613	1.42864	2.23878	-0.321523	1.42873	2.23887	-0.321433	1.42882	2.23896	-0.321343	1.42891	2.23905	-0.321253	1.429	2.23914	-0.321163	1.42909	2.23923	-0.321073	1.42918	2.23932	-0.320983	1.42927	2.23941	-0.320893	1.42936	2.2395	-0.320803	1.42945	2.23959
ENSG00000142657	PGD	-0.797352	-0.747737	-1.21977	-1.42555	0.592133	0.166816	-0.362889	2.01526	1.96242	0.795678	-0.38067	-0.206771	1.81769	2.51482	1.24797	-0.144662	2.51491	1.24806	-0.144572	2.515	1.24815	-0.144482	2.51509	1.24824	-0.144392	2.51518	1.24833	-0.144302	2.51527	1.24842	-0.144212	2.51536	1.24851	-0.144122	2.51545	1.2486	-0.144032	2.51554	1.24869	-0.143942	2.51563	1.24878	-0.143852	2.51572	1.24887	-0.143762	2.51581	1.24896
ENSG00000142655	PEX14	-0.40119	2.00415	0.161764	0.00347251	0.964645	0.168017	-1.69634	1.12459	0.178994	-0.0204641	0.395021	-0.609769	2.3974	-0.0883516	-0.585667	-0.199231	-0.0882616	-0.585577	-0.199141	-0.0881716	-0.585487	-0.199051	-0.0880816	-0.585397	-0.198961	-0.0879916	-0.585307	-0.198871	-0.0879016	-0.585217	-0.198781	-0.0878116	-0.585127	-0.198691	-0.0877216	-0.585037	-0.198601	-0.0876316	-0.584947	-0.198511	-0.0875416	-0.584857	-0.198421	-0.0874516	-0.584767	-0.198331	-0.0873616	-0.584677
ENSG00000130940	CASZ1	0.733218	0.578203	-0.837084	1.20413	-0.217238	0.265804	1.40821	1.19171	-0.0578784	0.617408	-1.13812	0.277653	-0.0720658	-0.782665	-1.31972	0.24757	-0.782575	-1.31963	0.24766	-0.782485	-1.31954	0.24775	-0.782395	-1.31945	0.24784	-0.782305	-1.31936	0.24793	-0.782215	-1.31927	0.24802	-0.782125	-1.31918	0.24811	-0.782035	-1.31909	0.2482	-0.781945	-1.319	0.24829	-0.781855	-1.31891	0.24838	-0.781765	-1.31882	0.24847	-0.781675	-1.31873
ENSG00000120948	TARDBP	-1.01186	-1.73943	0.0401737	0.701112	-1.31948	0.237318	-1.12244	0.523623	-0.309111	0.776871	0.921568	-1.89948	-1.07853	-0.823257	-1.56207	-0.214218	-0.823167	-1.56198	-0.214128	-0.823077	-1.56189	-0.214038	-0.822987	-1.5618	-0.213948	-0.822897	-1.56171	-0.213858	-0.822807	-1.56162	-0.213768	-0.822717	-1.56153	-0.213678	-0.822627	-1.56144	-0.213588	-0.822537	-1.56135	-0.213498	-0.822447	-1.56126	-0.213408	-0.822357	-1.56117	-0.213318	-0.822267	-1.56108
ENSG00000116649	SRM	-1.22244	1.32186	2.20047	1.20273	0.398925	1.71863	0.862046	1.04226	0.635556	0.688313	0.228128	0.0924471	1.81526	0.725496	-0.623032	0.77476	0.725586	-0.622942	0.77485	0.725676	-0.622852	0.77494	0.725766	-0.622762	0.77503	0.725856	-0.622672	0.77512	0.725946	-0.622582	0.77521	0.726036	-0.622492	0.7753	0.726126	-0.622402	0.77539	0.726216	-0.622312	0.77548	0.726306	-0.622222	0.77557	0.726396	-0.622132	0.77566	0.726486	-0.622042
ENSG00000198793	MTOR	-1.99856	-3.02623	0.28004	0.436309	-0.587387	-0.393492	0.127809	0.13712	-0.403495	-0.641836	-0.135898	1.14236	-0.39949	-2.21586	-0.394602	-0.884634	-2.21577	-0.394512	-0.884544	-2.21568	-0.394422	-0.884454	-2.21559	-0.394332	-0.884364	-2.2155	-0.394242	-0.884274	-2.21541	-0.394152	-0.884184	-2.21532	-0.394062	-0.884094	-2.21523	-0.393972	-0.884004	-2.21514	-0.393882	-0.883914	-2.21505	-0.393792	-0.883824	-2.21496	-0.393702	-0.883734	-2.21487	-0.393612
ENSG00000120942	UBIAD1	0.101262	1.98613	-0.37507	-0.468483	-0.197534	-0.566855	0.364093	-1.87436	-0.548737	-1.13937	1.06475	0.648161	-0.40806	-1.59855	-3.2032	-0.13734	-1.59846	-3.20311	-0.13725	-1.59837	-3.20302	-0.13716	-1.59828	-3.20293	-0.13707	-1.59819	-3.20284	-0.13698	-1.5981	-3.20275	-0.13689	-1.59801	-3.20266	-0.1368	-1.59792	-3.20257	-0.13671	-1.59783	-3.20248	-0.13662	-1.59774	-3.20239	-0.13653	-1.59765	-3.2023	-0.13644	-1.59756	-3.20221
ENSG00000116661	FBXO2	1.05381	0.794631	-0.0650654	0.346523	0.37686	0.588858	0.785111	-0.781362	-0.730774	-1.86525	0.890645	0.94814	-0.212438	-0.6901	-0.688778	-0.534114	-0.69001	-0.688688	-0.534024	-0.68992	-0.688598	-0.533934	-0.68983	-0.688508	-0.533844	-0.68974	-0.688418	-0.533754	-0.68965	-0.688328	-0.533664	-0.68956	-0.688238	-0.533574	-0.68947	-0.688148	-0.533484	-0.68938	-0.688058	-0.533394	-0.68929	-0.687968	-0.533304	-0.6892	-0.687878	-0.533214	-0.68911	-0.687788
ENSG00000132879	FBXO44	1.09302	1.99919	-0.497277	1.02461	0.232503	0.136055	0.215147	-2.12753	-1.92317	-1.52554	1.10317	1.20302	-0.577555	-1.52155	-1.17318	0.19168	-1.52146	-1.17309	0.19177	-1.52137	-1.173	0.19186	-1.52128	-1.17291	0.19195	-1.52119	-1.17282	0.19204	-1.5211	-1.17273	0.19213	-1.52101	-1.17264	0.19222	-1.52092	-1.17255	0.19231	-1.52083	-1.17246	0.1924	-1.52074	-1.17237	0.19249	-1.52065	-1.17228	0.19258	-1.52056	-1.17219
ENSG00000116663	FBXO6	1.09463	3.11073	-0.265852	-1.27012	-0.167374	0.983873	0.170085	2.02653	2.19946	-0.493584	-0.251102	-0.934797	-0.263977	0.157668	-0.588131	-0.105839	0.157758	-0.588041	-0.105749	0.157848	-0.587951	-0.105659	0.157938	-0.587861	-0.105569	0.158028	-0.587771	-0.105479	0.158118	-0.587681	-0.105389	0.158208	-0.587591	-0.105299	0.158298	-0.587501	-0.105209	0.158388	-0.587411	-0.105119	0.158478	-0.587321	-0.105029	0.158568	-0.587231	-0.104939	0.158658	-0.587141
ENSG00000116670	MAD2L2	0.805292	0.795462	0.0408632	0.701615	0.787381	1.94264	0.573822	-0.415439	1.11181	0.492034	0.294478	0.660232	0.984138	2.64854	0.0657221	0.600828	2.64863	0.0658121	0.600918	2.64872	0.0659021	0.601008	2.64881	0.0659921	0.601098	2.6489	0.0660821	0.601188	2.64899	0.0661721	0.601278	2.64908	0.0662621	0.601368	2.64917	0.0663521	0.601458	2.64926	0.0664421	0.601548	2.64935	0.0665321	0.601638	2.64944	0.0666221	0.601728	2.64953	0.0667121
ENSG00000162490	DRAXIN	-0.0601373	-0.650051	0.478028	0.120559	2.01544	1.80857	0.0527797	-0.515963	-0.289088	-0.389546	1.53048	0.831043	0.0431406	-0.563598	0.349314	0.115101	-0.563508	0.349404	0.115191	-0.563418	0.349494	0.115281	-0.563328	0.349584	0.115371	-0.563238	0.349674	0.115461	-0.563148	0.349764	0.115551	-0.563058	0.349854	0.115641	-0.562968	0.349944	0.115731	-0.562878	0.350034	0.115821	-0.562788	0.350124	0.115911	-0.562698	0.350214	0.116001	-0.562608	0.350304
ENSG00000177674	AGTRAP	-0.338823	0.0958638	-1.79702	-1.93366	1.37502	-0.0498897	-0.216817	1.94893	1.6507	0.633222	-0.162736	0.206711	1.63767	1.78924	0.89018	0.188758	1.78933	0.89027	0.188848	1.78942	0.89036	0.188938	1.78951	0.89045	0.189028	1.7896	0.89054	0.189118	1.78969	0.89063	0.189208	1.78978	0.89072	0.189298	1.78987	0.89081	0.189388	1.78996	0.8909	0.189478	1.79005	0.89099	0.189568	1.79014	0.89108	0.189658	1.79023	0.89117
ENSG00000177000	MTHFR	-1.55127	-1.09203	-0.553345	-2.55266	0.894001	-0.719623	-0.948865	1.82204	0.373241	-0.741674	-0.113121	0.240898	-0.505968	-1.44393	1.3768	-0.484222	-1.44384	1.37689	-0.484132	-1.44375	1.37698	-0.484042	-1.44366	1.37707	-0.483952	-1.44357	1.37716	-0.483862	-1.44348	1.37725	-0.483772	-1.44339	1.37734	-0.483682	-1.4433	1.37743	-0.483592	-1.44321	1.37752	-0.483502	-1.44312	1.37761	-0.483412	-1.44303	1.3777	-0.483322	-1.44294	1.37779
ENSG00000011021	CLCN6	-2.19568	-2.59563	-0.35515	0.168425	1.46379	-0.438395	-0.368496	0.274711	1.36779	0.998192	-1.23986	1.63768	-0.244186	-1.44736	1.25385	-0.643623	-1.44727	1.25394	-0.643533	-1.44718	1.25403	-0.643443	-1.44709	1.25412	-0.643353	-1.447	1.25421	-0.643263	-1.44691	1.2543	-0.643173	-1.44682	1.25439	-0.643083	-1.44673	1.25448	-0.642993	-1.44664	1.25457	-0.642903	-1.44655	1.25466	-0.642813	-1.44646	1.25475	-0.642723	-1.44637	1.25484
ENSG00000285646	NA	0.940292	0.948981	0.590498	-0.835551	0.267191	0.470064	-1.11049	0.860373	-0.168246	-1.31084	-0.800393	-0.617187	-0.376601	0.0749584	-0.636976	-0.993314	0.0750484	-0.636886	-0.993224	0.0751384	-0.636796	-0.993134	0.0752284	-0.636706	-0.993044	0.0753184	-0.636616	-0.992954	0.0754084	-0.636526	-0.992864	0.0754984	-0.636436	-0.992774	0.0755884	-0.636346	-0.992684	0.0756784	-0.636256	-0.992594	0.0757684	-0.636166	-0.992504	0.0758584	-0.636076	-0.992414	0.0759484	-0.635986
ENSG00000116685	KIAA2013	-0.822936	0.605649	-0.177907	-1.55931	1.42159	0.711587	0.846559	1.93167	0.412134	-0.631499	-0.479683	0.0334118	1.82948	-0.120154	0.33065	0.082877	-0.120064	0.33074	0.082967	-0.119974	0.33083	0.083057	-0.119884	0.33092	0.083147	-0.119794	0.33101	0.083237	-0.119704	0.3311	0.083327	-0.119614	0.33119	0.083417	-0.119524	0.33128	0.083507	-0.119434	0.33137	0.083597	-0.119344	0.33146	0.083687	-0.119254	0.33155	0.083777	-0.119164	0.33164
ENSG00000083444	PLOD1	-1.0522	-1.05037	-0.683254	-1.55305	1.18504	1.03505	-0.0728212	2.38865	1.85948	0.356741	-0.715199	0.0564978	1.54007	1.06268	1.2687	-0.15388	1.06277	1.26879	-0.15379	1.06286	1.26888	-0.1537	1.06295	1.26897	-0.15361	1.06304	1.26906	-0.15352	1.06313	1.26915	-0.15343	1.06322	1.26924	-0.15334	1.06331	1.26933	-0.15325	1.0634	1.26942	-0.15316	1.06349	1.26951	-0.15307	1.06358	1.2696	-0.15298	1.06367	1.26969
ENSG00000116688	MFN2	-2.59573	-1.72793	-1.25367	-0.583247	-0.0745898	-0.499966	-0.12818	0.821802	1.62315	0.659903	-0.797478	-0.159018	0.9747	1.1952	3.06167	0.14785	1.19529	3.06176	0.14794	1.19538	3.06185	0.14803	1.19547	3.06194	0.14812	1.19556	3.06203	0.14821	1.19565	3.06212	0.1483	1.19574	3.06221	0.14839	1.19583	3.0623	0.14848	1.19592	3.06239	0.14857	1.19601	3.06248	0.14866	1.1961	3.06257	0.14875	1.19619	3.06266
ENSG00000116691	MIIP	-0.71914	1.78976	-1.33803	-0.859981	1.11688	0.177851	-0.160516	1.26125	1.12698	0.505261	-1.54876	0.443538	1.85376	2.39606	-0.105594	0.514672	2.39615	-0.105504	0.514762	2.39624	-0.105414	0.514852	2.39633	-0.105324	0.514942	2.39642	-0.105234	0.515032	2.39651	-0.105144	0.515122	2.3966	-0.105054	0.515212	2.39669	-0.104964	0.515302	2.39678	-0.104874	0.515392	2.39687	-0.104784	0.515482	2.39696	-0.104694	0.515572	2.39705	-0.104604
ENSG00000120949	TNFRSF8	-0.780381	-1.99689	-1.63447	-1.80507	0.644897	-2.03433	-0.298458	-0.422434	-1.03053	-0.419062	-0.0313523	-0.465757	-0.206899	-1.51475	-0.198303	0.13018	-1.51466	-0.198213	0.13027	-1.51457	-0.198123	0.13036	-1.51448	-0.198033	0.13045	-1.51439	-0.197943	0.13054	-1.5143	-0.197853	0.13063	-1.51421	-0.197763	0.13072	-1.51412	-0.197673	0.13081	-1.51403	-0.197583	0.1309	-1.51394	-0.197493	0.13099	-1.51385	-0.197403	0.13108	-1.51376	-0.197313
ENSG00000028137	TNFRSF1B	-1.47871	-1.56509	-2.35721	-2.42882	1.46088	-0.723721	0.341719	1.05351	0.850568	-0.125833	-0.874485	0.0896748	0.872421	-0.516075	1.11065	-0.396423	-0.515985	1.11074	-0.396333	-0.515895	1.11083	-0.396243	-0.515805	1.11092	-0.396153	-0.515715	1.11101	-0.396063	-0.515625	1.1111	-0.395973	-0.515535	1.11119	-0.395883	-0.515445	1.11128	-0.395793	-0.515355	1.11137	-0.395703	-0.515265	1.11146	-0.395613	-0.515175	1.11155	-0.395523	-0.515085	1.11164
ENSG00000162496	DHRS3	0.585341	1.02799	-0.120776	1.35222	-0.752335	0.714219	-0.657978	-1.68037	-1.21522	-1.61545	0.185564	0.320704	-0.998193	-1.41497	-2.86974	-0.750084	-1.41488	-2.86965	-0.749994	-1.41479	-2.86956	-0.749904	-1.4147	-2.86947	-0.749814	-1.41461	-2.86938	-0.749724	-1.41452	-2.86929	-0.749634	-1.41443	-2.8692	-0.749544	-1.41434	-2.86911	-0.749454	-1.41425	-2.86902	-0.749364	-1.41416	-2.86893	-0.749274	-1.41407	-2.86884	-0.749184	-1.41398	-2.86875
ENSG00000116731	PRDM2	-0.208289	-0.296037	-0.434632	1.07286	-0.608561	-0.736195	-0.71174	-1.24413	-0.182784	-0.985624	0.0475461	1.32833	-1.38085	-1.94209	-1.10602	-1.07832	-1.942	-1.10593	-1.07823	-1.94191	-1.10584	-1.07814	-1.94182	-1.10575	-1.07805	-1.94173	-1.10566	-1.07796	-1.94164	-1.10557	-1.07787	-1.94155	-1.10548	-1.07778	-1.94146	-1.10539	-1.07769	-1.94137	-1.1053	-1.0776	-1.94128	-1.10521	-1.07751	-1.94119	-1.10512	-1.07742	-1.9411	-1.10503
ENSG00000171729	TMEM51	-0.179895	1.61401	-1.2107	-0.800048	0.872832	-0.0281671	-0.433719	0.598773	1.92015	-1.15721	1.12457	-0.0821685	2.00422	-0.866487	-0.178045	-1.60935	-0.866397	-0.177955	-1.60926	-0.866307	-0.177865	-1.60917	-0.866217	-0.177775	-1.60908	-0.866127	-0.177685	-1.60899	-0.866037	-0.177595	-1.6089	-0.865947	-0.177505	-1.60881	-0.865857	-0.177415	-1.60872	-0.865767	-0.177325	-1.60863	-0.865677	-0.177235	-1.60854	-0.865587	-0.177145	-1.60845	-0.865497	-0.177055
ENSG00000228140	NA	-0.252334	0.252926	-0.559152	0.830778	1.04275	0.990935	-0.469726	-2.06534	-1.27967	0.21503	0.0760025	-1.62402	0.411545	-0.755852	-1.13212	-0.791021	-0.755762	-1.13203	-0.790931	-0.755672	-1.13194	-0.790841	-0.755582	-1.13185	-0.790751	-0.755492	-1.13176	-0.790661	-0.755402	-1.13167	-0.790571	-0.755312	-1.13158	-0.790481	-0.755222	-1.13149	-0.790391	-0.755132	-1.1314	-0.790301	-0.755042	-1.13131	-0.790211	-0.754952	-1.13122	-0.790121	-0.754862	-1.13113
ENSG00000142634	EFHD2	-0.789586	0.349904	-1.4042	-1.36732	2.00977	1.05354	0.0757617	0.772661	-0.0755988	0.180251	-0.54311	0.279443	1.77873	1.41986	-0.728098	-0.0178395	1.41995	-0.728008	-0.0177495	1.42004	-0.727918	-0.0176595	1.42013	-0.727828	-0.0175695	1.42022	-0.727738	-0.0174795	1.42031	-0.727648	-0.0173895	1.4204	-0.727558	-0.0172995	1.42049	-0.727468	-0.0172095	1.42058	-0.727378	-0.0171195	1.42067	-0.727288	-0.0170295	1.42076	-0.727198	-0.0169395	1.42085	-0.727108
ENSG00000132906	CASP9	-0.845502	-0.0722016	-2.03966	0.942894	0.224712	-0.817498	-0.233214	0.593218	1.08362	-0.308014	-0.95604	-0.284325	1.32368	0.957324	0.91385	-0.334347	0.957414	0.91394	-0.334257	0.957504	0.91403	-0.334167	0.957594	0.91412	-0.334077	0.957684	0.91421	-0.333987	0.957774	0.9143	-0.333897	0.957864	0.91439	-0.333807	0.957954	0.91448	-0.333717	0.958044	0.91457	-0.333627	0.958134	0.91466	-0.333537	0.958224	0.91475	-0.333447	0.958314	0.91484
ENSG00000116138	DNAJC16	-1.74019	-2.401	-0.114313	-1.9112	-0.793332	-1.09155	-0.939777	0.952317	0.84463	-0.110789	0.715967	-1.00486	-0.0839828	-0.774112	0.677956	-0.249346	-0.774022	0.678046	-0.249256	-0.773932	0.678136	-0.249166	-0.773842	0.678226	-0.249076	-0.773752	0.678316	-0.248986	-0.773662	0.678406	-0.248896	-0.773572	0.678496	-0.248806	-0.773482	0.678586	-0.248716	-0.773392	0.678676	-0.248626	-0.773302	0.678766	-0.248536	-0.773212	0.678856	-0.248446	-0.773122	0.678946
ENSG00000116771	AGMAT	0.682066	-0.00242431	0.931286	1.32781	0.630246	0.619303	1.17749	-1.56247	-1.96064	1.59078	0.92846	-0.19663	0.746888	-0.146461	-0.987071	1.59154	-0.146371	-0.986981	1.59163	-0.146281	-0.986891	1.59172	-0.146191	-0.986801	1.59181	-0.146101	-0.986711	1.5919	-0.146011	-0.986621	1.59199	-0.145921	-0.986531	1.59208	-0.145831	-0.986441	1.59217	-0.145741	-0.986351	1.59226	-0.145651	-0.986261	1.59235	-0.145561	-0.986171	1.59244	-0.145471	-0.986081
ENSG00000116786	PLEKHM2	-1.90024	-1.01769	-0.756738	0.62114	1.62152	0.664105	0.540816	0.397553	-3.32384	-0.337158	-0.6771	2.0615	1.42138	1.17146	0.470016	-0.585562	1.17155	0.470106	-0.585472	1.17164	0.470196	-0.585382	1.17173	0.470286	-0.585292	1.17182	0.470376	-0.585202	1.17191	0.470466	-0.585112	1.172	0.470556	-0.585022	1.17209	0.470646	-0.584932	1.17218	0.470736	-0.584842	1.17227	0.470826	-0.584752	1.17236	0.470916	-0.584662	1.17245	0.471006
ENSG00000179743	FLJ37453	0.670644	0.170525	0.00364855	-0.0785818	0.0817474	0.646798	0.837775	-1.55606	-1.11807	-0.318389	1.38586	0.880123	0.0653418	1.28374	-0.81098	0.408111	1.28383	-0.81089	0.408201	1.28392	-0.8108	0.408291	1.28401	-0.81071	0.408381	1.2841	-0.81062	0.408471	1.28419	-0.81053	0.408561	1.28428	-0.81044	0.408651	1.28437	-0.81035	0.408741	1.28446	-0.81026	0.408831	1.28455	-0.81017	0.408921	1.28464	-0.81008	0.409011	1.28473	-0.80999
ENSG00000142632	ARHGEF19	1.34637	1.86697	0.315748	-0.789243	-0.129576	-0.422771	-0.101366	-0.185639	-0.111819	-1.00872	0.273189	0.00185603	1.19185	-2.45808	-1.85406	-0.149875	-2.45799	-1.85397	-0.149785	-2.4579	-1.85388	-0.149695	-2.45781	-1.85379	-0.149605	-2.45772	-1.8537	-0.149515	-2.45763	-1.85361	-0.149425	-2.45754	-1.85352	-0.149335	-2.45745	-1.85343	-0.149245	-2.45736	-1.85334	-0.149155	-2.45727	-1.85325	-0.149065	-2.45718	-1.85316	-0.148975	-2.45709	-1.85307
ENSG00000288398	NA	-1.74434	-0.392227	0.177012	0.198947	-0.0846407	0.306259	-0.310738	0.530009	-1.65554	-0.831574	-2.17298	0.643284	0.547441	-0.969069	-1.03036	-0.614479	-0.968979	-1.03027	-0.614389	-0.968889	-1.03018	-0.614299	-0.968799	-1.03009	-0.614209	-0.968709	-1.03	-0.614119	-0.968619	-1.02991	-0.614029	-0.968529	-1.02982	-0.613939	-0.968439	-1.02973	-0.613849	-0.968349	-1.02964	-0.613759	-0.968259	-1.02955	-0.613669	-0.968169	-1.02946	-0.613579	-0.968079	-1.02937
ENSG00000132881	CPLANE2	-1.7623	1.8345	0.243001	0.542777	1.44336	1.03923	1.97858	-0.830653	-0.503515	-0.524526	0.178878	-0.22063	-0.804044	-1.02342	0.618228	1.90994	-1.02333	0.618318	1.91003	-1.02324	0.618408	1.91012	-1.02315	0.618498	1.91021	-1.02306	0.618588	1.9103	-1.02297	0.618678	1.91039	-1.02288	0.618768	1.91048	-1.02279	0.618858	1.91057	-1.0227	0.618948	1.91066	-1.02261	0.619038	1.91075	-1.02252	0.619128	1.91084	-1.02243	0.619218
ENSG00000037637	FBXO42	-0.86523	0.190933	-0.952259	-0.273231	-0.46142	-2.25022	-1.50718	-0.103064	1.33704	-0.668248	-1.12212	-1.07312	-0.948787	-1.98019	-0.251632	-1.26837	-1.9801	-0.251542	-1.26828	-1.98001	-0.251452	-1.26819	-1.97992	-0.251362	-1.2681	-1.97983	-0.251272	-1.26801	-1.97974	-0.251182	-1.26792	-1.97965	-0.251092	-1.26783	-1.97956	-0.251002	-1.26774	-1.97947	-0.250912	-1.26765	-1.97938	-0.250822	-1.26756	-1.97929	-0.250732	-1.26747	-1.9792	-0.250642
ENSG00000055070	SZRD1	-1.20359	1.90246	-1.52605	0.131358	1.74872	0.589692	0.662225	-0.095473	1.78432	0.687948	-0.812535	0.749336	1.66243	1.57434	0.326542	-0.280869	1.57443	0.326632	-0.280779	1.57452	0.326722	-0.280689	1.57461	0.326812	-0.280599	1.5747	0.326902	-0.280509	1.57479	0.326992	-0.280419	1.57488	0.327082	-0.280329	1.57497	0.327172	-0.280239	1.57506	0.327262	-0.280149	1.57515	0.327352	-0.280059	1.57524	0.327442	-0.279969	1.57533	0.327532
ENSG00000157191	NECAP2	0.317075	1.35167	-1.39821	-1.34651	-0.637323	-1.04413	0.96709	-0.390576	-1.98082	-1.34796	0.377757	-0.950078	-0.433644	-0.318172	-2.10074	-0.612153	-0.318082	-2.10065	-0.612063	-0.317992	-2.10056	-0.611973	-0.317902	-2.10047	-0.611883	-0.317812	-2.10038	-0.611793	-0.317722	-2.10029	-0.611703	-0.317632	-2.1002	-0.611613	-0.317542	-2.10011	-0.611523	-0.317452	-2.10002	-0.611433	-0.317362	-2.09993	-0.611343	-0.317272	-2.09984	-0.611253	-0.317182	-2.09975
ENSG00000080947	CROCCP3	0.422957	0.438775	0.04738	-1.50284	-0.226959	-1.07139	-0.303473	0.915541	-0.55914	-0.850525	0.740911	1.09353	-1.29884	-2.71911	-0.853398	0.138887	-2.71902	-0.853308	0.138977	-2.71893	-0.853218	0.139067	-2.71884	-0.853128	0.139157	-2.71875	-0.853038	0.139247	-2.71866	-0.852948	0.139337	-2.71857	-0.852858	0.139427	-2.71848	-0.852768	0.139517	-2.71839	-0.852678	0.139607	-2.7183	-0.852588	0.139697	-2.71821	-0.852498	0.139787	-2.71812	-0.852408
ENSG00000219481	NBPF1	0.614476	-0.55244	-0.936154	-0.704091	0.364516	-0.0467686	1.04212	-0.83462	-0.3001	-0.728175	1.92037	2.0809	-0.598585	-2.18059	-0.300747	-0.795293	-2.1805	-0.300657	-0.795203	-2.18041	-0.300567	-0.795113	-2.18032	-0.300477	-0.795023	-2.18023	-0.300387	-0.794933	-2.18014	-0.300297	-0.794843	-2.18005	-0.300207	-0.794753	-2.17996	-0.300117	-0.794663	-2.17987	-0.300027	-0.794573	-2.17978	-0.299937	-0.794483	-2.17969	-0.299847	-0.794393	-2.1796	-0.299757
ENSG00000215908	CROCCP2	-0.372223	0.406055	0.466721	0.118474	0.988278	-0.360234	0.741968	0.415113	0.498693	-1.50493	1.4227	1.68249	-2.40696	-1.61378	-0.0700013	-0.0555821	-1.61369	-0.0699113	-0.0554921	-1.6136	-0.0698213	-0.0554021	-1.61351	-0.0697313	-0.0553121	-1.61342	-0.0696413	-0.0552221	-1.61333	-0.0695513	-0.0551321	-1.61324	-0.0694613	-0.0550421	-1.61315	-0.0693713	-0.0549521	-1.61306	-0.0692813	-0.0548621	-1.61297	-0.0691913	-0.0547721	-1.61288	-0.0691013	-0.0546821	-1.61279	-0.0690113
ENSG00000058453	CROCC	-0.0269127	0.213297	-0.294577	0.50934	0.485356	-0.172226	-0.553509	-0.783527	-1.9248	-1.95866	0.0187192	1.96442	-1.08807	-1.52373	-1.5961	-0.321391	-1.52364	-1.59601	-0.321301	-1.52355	-1.59592	-0.321211	-1.52346	-1.59583	-0.321121	-1.52337	-1.59574	-0.321031	-1.52328	-1.59565	-0.320941	-1.52319	-1.59556	-0.320851	-1.5231	-1.59547	-0.320761	-1.52301	-1.59538	-0.320671	-1.52292	-1.59529	-0.320581	-1.52283	-1.5952	-0.320491	-1.52274	-1.59511
ENSG00000238142	LOC105376805	1.60774	-0.182097	0.0831685	-2.67873	0.976915	0.462131	1.11505	-0.749018	-1.02746	-0.680054	0.189505	0.749863	0.651936	-0.0583188	-0.647472	0.361091	-0.0582288	-0.647382	0.361181	-0.0581388	-0.647292	0.361271	-0.0580488	-0.647202	0.361361	-0.0579588	-0.647112	0.361451	-0.0578688	-0.647022	0.361541	-0.0577788	-0.646932	0.361631	-0.0576888	-0.646842	0.361721	-0.0575988	-0.646752	0.361811	-0.0575088	-0.646662	0.361901	-0.0574188	-0.646572	0.361991	-0.0573288	-0.646482
ENSG00000117118	SDHB	1.32386	1.56097	0.0655211	-1.06804	0.758764	1.1772	0.504785	1.70332	1.5384	0.722094	-0.0464421	-0.352019	0.98935	1.92457	-0.276548	-0.0392301	1.92466	-0.276458	-0.0391401	1.92475	-0.276368	-0.0390501	1.92484	-0.276278	-0.0389601	1.92493	-0.276188	-0.0388701	1.92502	-0.276098	-0.0387801	1.92511	-0.276008	-0.0386901	1.9252	-0.275918	-0.0386001	1.92529	-0.275828	-0.0385101	1.92538	-0.275738	-0.0384201	1.92547	-0.275648	-0.0383301	1.92556	-0.275558
ENSG00000117115	PADI2	-0.675925	-0.236535	-2.08277	-1.89904	1.18477	-1.38603	-0.738454	1.34662	1.57979	-1.41435	-0.637927	-1.00989	-0.488426	1.60063	0.810741	-1.96171	1.60072	0.810831	-1.96162	1.60081	0.810921	-1.96153	1.6009	0.811011	-1.96144	1.60099	0.811101	-1.96135	1.60108	0.811191	-1.96126	1.60117	0.811281	-1.96117	1.60126	0.811371	-1.96108	1.60135	0.811461	-1.96099	1.60144	0.811551	-1.9609	1.60153	0.811641	-1.96081	1.60162	0.811731
ENSG00000159339	PADI4	-0.970092	-1.50108	-1.52841	-1.91192	0.837408	-0.237701	-0.13128	2.00242	1.79578	1.22371	-0.921655	-0.458329	1.62018	1.26267	0.73886	0.677463	1.26276	0.73895	0.677553	1.26285	0.73904	0.677643	1.26294	0.73913	0.677733	1.26303	0.73922	0.677823	1.26312	0.73931	0.677913	1.26321	0.7394	0.678003	1.2633	0.73949	0.678093	1.26339	0.73958	0.678183	1.26348	0.73967	0.678273	1.26357	0.73976	0.678363	1.26366	0.73985
ENSG00000276747	PADI6	-0.840309	0.902765	1.24509	-1.92955	0.394244	-2.07752	0.975079	-1.05127	1.16313	-0.751995	0.955667	0.0819127	0.70101	-0.243272	0.491261	-1.99714	-0.243182	0.491351	-1.99705	-0.243092	0.491441	-1.99696	-0.243002	0.491531	-1.99687	-0.242912	0.491621	-1.99678	-0.242822	0.491711	-1.99669	-0.242732	0.491801	-1.9966	-0.242642	0.491891	-1.99651	-0.242552	0.491981	-1.99642	-0.242462	0.492071	-1.99633	-0.242372	0.492161	-1.99624	-0.242282	0.492251
ENSG00000179051	RCC2	-1.52668	-0.552726	0.463612	-0.796441	-0.2723	0.52084	-0.584425	1.06853	0.972478	1.13021	-0.524198	-2.315	2.48966	-1.24916	-0.411293	-0.214515	-1.24907	-0.411203	-0.214425	-1.24898	-0.411113	-0.214335	-1.24889	-0.411023	-0.214245	-1.2488	-0.410933	-0.214155	-1.24871	-0.410843	-0.214065	-1.24862	-0.410753	-0.213975	-1.24853	-0.410663	-0.213885	-1.24844	-0.410573	-0.213795	-1.24835	-0.410483	-0.213705	-1.24826	-0.410393	-0.213615	-1.24817	-0.410303
ENSG00000074964	ARHGEF10L	-1.61884	-1.19056	-0.774074	-2.28227	-0.0567463	-0.703594	-0.584712	0.858634	0.482219	-0.97453	-0.299133	-0.284933	-0.0597826	-2.11737	0.453469	-0.876055	-2.11728	0.453559	-0.875965	-2.11719	0.453649	-0.875875	-2.1171	0.453739	-0.875785	-2.11701	0.453829	-0.875695	-2.11692	0.453919	-0.875605	-2.11683	0.454009	-0.875515	-2.11674	0.454099	-0.875425	-2.11665	0.454189	-0.875335	-2.11656	0.454279	-0.875245	-2.11647	0.454369	-0.875155	-2.11638	0.454459
ENSG00000159423	ALDH4A1	-0.862777	-0.384142	0.115166	0.510965	0.871607	-0.632778	0.181424	2.24164	1.02649	0.61191	-0.350451	-0.160187	2.20043	1.67128	-0.23104	0.190769	1.67137	-0.23095	0.190859	1.67146	-0.23086	0.190949	1.67155	-0.23077	0.191039	1.67164	-0.23068	0.191129	1.67173	-0.23059	0.191219	1.67182	-0.2305	0.191309	1.67191	-0.23041	0.191399	1.672	-0.23032	0.191489	1.67209	-0.23023	0.191579	1.67218	-0.23014	0.191669	1.67227	-0.23005
ENSG00000169991	IFFO2	-1.13647	0.304638	-0.643942	1.51427	0.714011	-0.308265	0.160897	-0.768439	-0.888172	-1.6138	-0.869171	-1.58366	0.169533	-0.361626	-0.934623	-1.00136	-0.361536	-0.934533	-1.00127	-0.361446	-0.934443	-1.00118	-0.361356	-0.934353	-1.00109	-0.361266	-0.934263	-1.001	-0.361176	-0.934173	-1.00091	-0.361086	-0.934083	-1.00082	-0.360996	-0.933993	-1.00073	-0.360906	-0.933903	-1.00064	-0.360816	-0.933813	-1.00055	-0.360726	-0.933723	-1.00046	-0.360636	-0.933633
ENSG00000053372	MRTO4	0.712513	0.645687	1.69933	-0.0758004	0.353605	1.46144	0.271918	1.54882	0.218736	1.61643	1.23184	-0.505865	0.921505	0.965822	-1.20989	0.338084	0.965912	-1.2098	0.338174	0.966002	-1.20971	0.338264	0.966092	-1.20962	0.338354	0.966182	-1.20953	0.338444	0.966272	-1.20944	0.338534	0.966362	-1.20935	0.338624	0.966452	-1.20926	0.338714	0.966542	-1.20917	0.338804	0.966632	-1.20908	0.338894	0.966722	-1.20899	0.338984	0.966812	-1.2089
ENSG00000040487	SLC66A1	-0.656593	-0.329349	-0.644639	-1.07343	0.302098	-1.76808	-0.264424	1.84987	1.71397	-0.580904	-0.380529	-0.740743	1.36719	1.71257	0.842243	-0.865838	1.71266	0.842333	-0.865748	1.71275	0.842423	-0.865658	1.71284	0.842513	-0.865568	1.71293	0.842603	-0.865478	1.71302	0.842693	-0.865388	1.71311	0.842783	-0.865298	1.7132	0.842873	-0.865208	1.71329	0.842963	-0.865118	1.71338	0.843053	-0.865028	1.71347	0.843143	-0.864938	1.71356	0.843233
ENSG00000173436	MICOS10	1.8764	-1.04925	1.09699	-0.803787	0.257566	1.1138	0.481077	0.164124	-1.99964	-0.715099	0.885685	0.32672	0.579675	-1.23208	-1.92939	0.390919	-1.23199	-1.9293	0.391009	-1.2319	-1.92921	0.391099	-1.23181	-1.92912	0.391189	-1.23172	-1.92903	0.391279	-1.23163	-1.92894	0.391369	-1.23154	-1.92885	0.391459	-1.23145	-1.92876	0.391549	-1.23136	-1.92867	0.391639	-1.23127	-1.92858	0.391729	-1.23118	-1.92849	0.391819	-1.23109	-1.9284
ENSG00000158747	NBL1	-0.571913	0.0325957	0.225408	2.65825	0.0418123	0.00198051	0.712221	-1.69126	-1.74347	-0.476936	-0.334247	-0.969177	-0.673443	-0.56221	-1.5451	-0.116558	-0.56212	-1.54501	-0.116468	-0.56203	-1.54492	-0.116378	-0.56194	-1.54483	-0.116288	-0.56185	-1.54474	-0.116198	-0.56176	-1.54465	-0.116108	-0.56167	-1.54456	-0.116018	-0.56158	-1.54447	-0.115928	-0.56149	-1.54438	-0.115838	-0.5614	-1.54429	-0.115748	-0.56131	-1.5442	-0.115658	-0.56122	-1.54411
ENSG00000158748	HTR6	-2.49016	-0.192054	-0.142717	0.407653	-1.52717	-0.376514	0.886128	-0.658514	-0.463615	-1.16755	0.338883	0.58255	-2.32661	0.615498	-0.358871	-0.0794465	0.615588	-0.358781	-0.0793565	0.615678	-0.358691	-0.0792665	0.615768	-0.358601	-0.0791765	0.615858	-0.358511	-0.0790865	0.615948	-0.358421	-0.0789965	0.616038	-0.358331	-0.0789065	0.616128	-0.358241	-0.0788165	0.616218	-0.358151	-0.0787265	0.616308	-0.358061	-0.0786365	0.616398	-0.357971	-0.0785465	0.616488	-0.357881
ENSG00000162542	TMCO4	0.0842103	0.28739	-0.275214	-1.42308	-0.0191167	0.0125459	0.164436	-0.19446	0.738269	-1.09538	-0.857736	-0.075196	-1.08299	-3.15938	-0.921783	-0.550769	-3.15929	-0.921693	-0.550679	-3.1592	-0.921603	-0.550589	-3.15911	-0.921513	-0.550499	-3.15902	-0.921423	-0.550409	-3.15893	-0.921333	-0.550319	-3.15884	-0.921243	-0.550229	-3.15875	-0.921153	-0.550139	-3.15866	-0.921063	-0.550049	-3.15857	-0.920973	-0.549959	-3.15848	-0.920883	-0.549869	-3.15839	-0.920793
ENSG00000169914	OTUD3	0.358845	0.0371237	0.204941	-0.0997231	-1.01146	-0.0342826	1.21115	-1.42012	-1.82283	0.0767743	0.449204	-0.307382	-1.45995	-1.35484	-1.71138	-0.0199923	-1.35475	-1.71129	-0.0199023	-1.35466	-1.7112	-0.0198123	-1.35457	-1.71111	-0.0197223	-1.35448	-1.71102	-0.0196323	-1.35439	-1.71093	-0.0195423	-1.3543	-1.71084	-0.0194523	-1.35421	-1.71075	-0.0193623	-1.35412	-1.71066	-0.0192723	-1.35403	-1.71057	-0.0191823	-1.35394	-1.71048	-0.0190923	-1.35385	-1.71039
ENSG00000162543	UBXN10	-0.679424	0.558773	0.654684	-0.353147	-0.836876	-0.0444293	0.593804	0.76621	1.29608	1.83038	0.814194	0.869093	1.31681	0.484641	1.48582	0.989802	0.484731	1.48591	0.989892	0.484821	1.486	0.989982	0.484911	1.48609	0.990072	0.485001	1.48618	0.990162	0.485091	1.48627	0.990252	0.485181	1.48636	0.990342	0.485271	1.48645	0.990432	0.485361	1.48654	0.990522	0.485451	1.48663	0.990612	0.485541	1.48672	0.990702	0.485631	1.48681
ENSG00000158825	CDA	0.0891325	-0.584734	-1.22741	-2.45057	0.323582	-0.564658	-0.572716	1.30692	2.29244	0.519636	-0.729368	0.291293	1.47793	1.08377	1.80694	-0.0782757	1.08386	1.80703	-0.0781857	1.08395	1.80712	-0.0780957	1.08404	1.80721	-0.0780057	1.08413	1.8073	-0.0779157	1.08422	1.80739	-0.0778257	1.08431	1.80748	-0.0777357	1.0844	1.80757	-0.0776457	1.08449	1.80766	-0.0775557	1.08458	1.80775	-0.0774657	1.08467	1.80784	-0.0773757	1.08476	1.80793
ENSG00000158828	PINK1	-1.88485	-1.4619	-0.438706	-1.67212	1.22325	-1.20896	0.336239	0.669931	-0.763097	0.186164	-1.00528	0.682297	0.463341	2.69856	-0.110684	-0.0191735	2.69865	-0.110594	-0.0190835	2.69874	-0.110504	-0.0189935	2.69883	-0.110414	-0.0189035	2.69892	-0.110324	-0.0188135	2.69901	-0.110234	-0.0187235	2.6991	-0.110144	-0.0186335	2.69919	-0.110054	-0.0185435	2.69928	-0.109964	-0.0184535	2.69937	-0.109874	-0.0183635	2.69946	-0.109784	-0.0182735	2.69955	-0.109694
ENSG00000117242	PINK1-AS	-1.00033	0.0395503	0.643547	-0.862777	-1.41561	1.35814	-1.49035	0.38536	-0.241119	-0.596529	-1.1102	0.949243	0.998914	-0.945147	-1.44399	1.15243	-0.945057	-1.4439	1.15252	-0.944967	-1.44381	1.15261	-0.944877	-1.44372	1.1527	-0.944787	-1.44363	1.15279	-0.944697	-1.44354	1.15288	-0.944607	-1.44345	1.15297	-0.944517	-1.44336	1.15306	-0.944427	-1.44327	1.15315	-0.944337	-1.44318	1.15324	-0.944247	-1.44309	1.15333	-0.944157	-1.443
ENSG00000244038	DDOST	-0.470934	0.735317	1.68909	0.063846	0.564985	1.54083	0.365371	1.54799	2.08487	0.0451479	-0.818295	-0.294298	1.86551	1.78273	-0.214683	0.148101	1.78282	-0.214593	0.148191	1.78291	-0.214503	0.148281	1.783	-0.214413	0.148371	1.78309	-0.214323	0.148461	1.78318	-0.214233	0.148551	1.78327	-0.214143	0.148641	1.78336	-0.214053	0.148731	1.78345	-0.213963	0.148821	1.78354	-0.213873	0.148911	1.78363	-0.213783	0.149001	1.78372	-0.213693
ENSG00000075151	EIF4G3	-1.08444	-0.705217	-0.699178	-0.936275	1.05075	0.69269	-0.950461	2.67031	1.47568	0.999167	-0.265461	0.185279	1.13115	1.45911	1.24146	0.945839	1.4592	1.24155	0.945929	1.45929	1.24164	0.946019	1.45938	1.24173	0.946109	1.45947	1.24182	0.946199	1.45956	1.24191	0.946289	1.45965	1.242	0.946379	1.45974	1.24209	0.946469	1.45983	1.24218	0.946559	1.45992	1.24227	0.946649	1.46001	1.24236	0.946739	1.4601	1.24245
ENSG00000117298	ECE1	-2.04315	0.0667303	-0.624427	-1.78061	0.377314	0.0583626	-0.257094	2.10157	2.33214	0.0427029	-0.933496	0.668075	1.63628	1.70049	1.19807	-0.687925	1.70058	1.19816	-0.687835	1.70067	1.19825	-0.687745	1.70076	1.19834	-0.687655	1.70085	1.19843	-0.687565	1.70094	1.19852	-0.687475	1.70103	1.19861	-0.687385	1.70112	1.1987	-0.687295	1.70121	1.19879	-0.687205	1.7013	1.19888	-0.687115	1.70139	1.19897	-0.687025	1.70148	1.19906
ENSG00000231105	ECE1-AS1	0.196746	1.28146	-0.415659	-0.625798	1.62249	-0.653798	0.0687956	-0.350417	-1.68869	-0.763459	0.336573	-0.109648	-0.560042	-0.184423	-0.517284	-1.18288	-0.184333	-0.517194	-1.18279	-0.184243	-0.517104	-1.1827	-0.184153	-0.517014	-1.18261	-0.184063	-0.516924	-1.18252	-0.183973	-0.516834	-1.18243	-0.183883	-0.516744	-1.18234	-0.183793	-0.516654	-1.18225	-0.183703	-0.516564	-1.18216	-0.183613	-0.516474	-1.18207	-0.183523	-0.516384	-1.18198	-0.183433	-0.516294
ENSG00000142794	NBPF3	-0.943613	-0.625691	-0.00388937	-1.66448	0.0695803	0.480629	1.01985	-2.09188	0.712181	-2.10461	1.4144	1.1695	-1.22168	0.173632	0.367869	-1.92364	0.173722	0.367959	-1.92355	0.173812	0.368049	-1.92346	0.173902	0.368139	-1.92337	0.173992	0.368229	-1.92328	0.174082	0.368319	-1.92319	0.174172	0.368409	-1.9231	0.174262	0.368499	-1.92301	0.174352	0.368589	-1.92292	0.174442	0.368679	-1.92283	0.174532	0.368769	-1.92274	0.174622	0.368859
ENSG00000076864	RAP1GAP	-0.272663	0.781855	1.50775	0.139136	0.199748	0.0338007	1.01974	0.121098	-0.225306	1.58864	0.60284	2.06301	0.224031	2.38183	-0.0614776	1.63558	2.38192	-0.0613876	1.63567	2.38201	-0.0612976	1.63576	2.3821	-0.0612076	1.63585	2.38219	-0.0611176	1.63594	2.38228	-0.0610276	1.63603	2.38237	-0.0609376	1.63612	2.38246	-0.0608476	1.63621	2.38255	-0.0607576	1.6363	2.38264	-0.0606676	1.63639	2.38273	-0.0605776	1.63648	2.38282	-0.0604876
ENSG00000142798	HSPG2	-1.01522	-1.06446	1.25092	0.918725	-0.137532	-0.61995	-0.446457	-0.822215	1.07277	-0.966885	-0.754448	1.99071	0.964996	1.53623	1.74153	0.482286	1.53632	1.74162	0.482376	1.53641	1.74171	0.482466	1.5365	1.7418	0.482556	1.53659	1.74189	0.482646	1.53668	1.74198	0.482736	1.53677	1.74207	0.482826	1.53686	1.74216	0.482916	1.53695	1.74225	0.483006	1.53704	1.74234	0.483096	1.53713	1.74243	0.483186	1.53722	1.74252
ENSG00000070831	CDC42	-0.708531	-0.438998	-0.0295949	0.246168	2.96577	1.85124	0.578421	0.938144	0.184169	1.27242	1.16451	-0.498295	1.51635	1.5883	-0.709629	0.062478	1.58839	-0.709539	0.062568	1.58848	-0.709449	0.062658	1.58857	-0.709359	0.062748	1.58866	-0.709269	0.062838	1.58875	-0.709179	0.062928	1.58884	-0.709089	0.063018	1.58893	-0.708999	0.063108	1.58902	-0.708909	0.063198	1.58911	-0.708819	0.063288	1.5892	-0.708729	0.063378	1.58929	-0.708639
ENSG00000184677	ZBTB40	-0.741922	-1.58576	0.325158	0.496314	-1.02519	-0.609598	0.118009	-2.27262	-1.34367	-1.07981	0.321412	-0.209771	-1.47781	-1.66666	-1.02228	-1.05325	-1.66657	-1.02219	-1.05316	-1.66648	-1.0221	-1.05307	-1.66639	-1.02201	-1.05298	-1.6663	-1.02192	-1.05289	-1.66621	-1.02183	-1.0528	-1.66612	-1.02174	-1.05271	-1.66603	-1.02165	-1.05262	-1.66594	-1.02156	-1.05253	-1.66585	-1.02147	-1.05244	-1.66576	-1.02138	-1.05235	-1.66567	-1.02129
ENSG00000173372	C1QA	-0.235084	0.148854	0.0560944	-0.415945	0.90063	0.834436	0.792809	1.72038	1.36622	0.583215	0.913545	0.6939	1.62846	-1.33248	2.3883	0.265643	-1.33239	2.38839	0.265733	-1.3323	2.38848	0.265823	-1.33221	2.38857	0.265913	-1.33212	2.38866	0.266003	-1.33203	2.38875	0.266093	-1.33194	2.38884	0.266183	-1.33185	2.38893	0.266273	-1.33176	2.38902	0.266363	-1.33167	2.38911	0.266453	-1.33158	2.3892	0.266543	-1.33149	2.38929
ENSG00000159189	C1QC	-0.368491	1.4846	0.669505	-0.0389913	0.353156	0.909894	0.441216	1.64854	1.27964	0.876551	1.07558	0.636236	1.48998	0.307914	1.98612	0.467061	0.308004	1.98621	0.467151	0.308094	1.9863	0.467241	0.308184	1.98639	0.467331	0.308274	1.98648	0.467421	0.308364	1.98657	0.467511	0.308454	1.98666	0.467601	0.308544	1.98675	0.467691	0.308634	1.98684	0.467781	0.308724	1.98693	0.467871	0.308814	1.98702	0.467961	0.308904	1.98711
ENSG00000173369	C1QB	0.0636382	0.943929	0.322876	-0.311971	0.63337	0.886334	0.849856	1.69962	1.61636	0.913475	0.996582	0.607399	1.63747	-0.237008	2.13493	0.382989	-0.236918	2.13502	0.383079	-0.236828	2.13511	0.383169	-0.236738	2.1352	0.383259	-0.236648	2.13529	0.383349	-0.236558	2.13538	0.383439	-0.236468	2.13547	0.383529	-0.236378	2.13556	0.383619	-0.236288	2.13565	0.383709	-0.236198	2.13574	0.383799	-0.236108	2.13583	0.383889	-0.236018	2.13592
ENSG00000133216	EPHB2	0.0809293	1.05001	0.376427	-0.601136	0.206197	0.463209	0.177012	1.82345	2.55046	0.323321	0.0157504	0.363334	1.36591	0.348801	1.03142	-0.331963	0.348891	1.03151	-0.331873	0.348981	1.0316	-0.331783	0.349071	1.03169	-0.331693	0.349161	1.03178	-0.331603	0.349251	1.03187	-0.331513	0.349341	1.03196	-0.331423	0.349431	1.03205	-0.331333	0.349521	1.03214	-0.331243	0.349611	1.03223	-0.331153	0.349701	1.03232	-0.331063	0.349791	1.03241
ENSG00000125945	ZNF436	0.318184	-1.48821	-0.0603207	-0.0440571	-1.73088	-1.66399	0.0051011	-0.421274	0.308037	0.0398874	0.485773	-1.09262	-2.02546	-2.36778	-1.01721	-0.172627	-2.36769	-1.01712	-0.172537	-2.3676	-1.01703	-0.172447	-2.36751	-1.01694	-0.172357	-2.36742	-1.01685	-0.172267	-2.36733	-1.01676	-0.172177	-2.36724	-1.01667	-0.172087	-2.36715	-1.01658	-0.171997	-2.36706	-1.01649	-0.171907	-2.36697	-1.0164	-0.171817	-2.36688	-1.01631	-0.171727	-2.36679	-1.01622
ENSG00000204219	TCEA3	1.43074	0.232813	0.447146	0.359462	-0.970965	0.29346	0.0138915	-3.04384	-1.34977	-1.57435	1.46486	-0.300793	-0.949457	-0.524178	-1.95052	-0.729327	-0.524088	-1.95043	-0.729237	-0.523998	-1.95034	-0.729147	-0.523908	-1.95025	-0.729057	-0.523818	-1.95016	-0.728967	-0.523728	-1.95007	-0.728877	-0.523638	-1.94998	-0.728787	-0.523548	-1.94989	-0.728697	-0.523458	-1.9498	-0.728607	-0.523368	-1.94971	-0.728517	-0.523278	-1.94962	-0.728427	-0.523188	-1.94953
ENSG00000088280	ASAP3	-0.830036	-0.841948	0.453966	0.121957	0.325941	-0.510904	0.733787	-0.48429	0.954606	0.0811533	1.23739	1.26485	0.490995	-1.94246	1.91254	1.21855	-1.94237	1.91263	1.21864	-1.94228	1.91272	1.21873	-1.94219	1.91281	1.21882	-1.9421	1.9129	1.21891	-1.94201	1.91299	1.219	-1.94192	1.91308	1.21909	-1.94183	1.91317	1.21918	-1.94174	1.91326	1.21927	-1.94165	1.91335	1.21936	-1.94156	1.91344	1.21945	-1.94147	1.91353
ENSG00000007968	E2F2	-0.402863	0.270492	1.03075	0.712203	0.606166	1.3774	0.589912	0.75408	1.43335	1.03351	0.735724	0.814792	1.28583	2.07962	1.07007	1.04093	2.07971	1.07016	1.04102	2.0798	1.07025	1.04111	2.07989	1.07034	1.0412	2.07998	1.07043	1.04129	2.08007	1.07052	1.04138	2.08016	1.07061	1.04147	2.08025	1.0707	1.04156	2.08034	1.07079	1.04165	2.08043	1.07088	1.04174	2.08052	1.07097	1.04183	2.08061	1.07106
ENSG00000117318	ID3	-0.871641	-0.0344296	-0.667008	1.60636	-0.480816	-0.779681	-0.344667	-1.83788	-1.32654	-1.28458	-0.655728	1.19043	-1.0347	-0.589255	-0.728708	-1.0862	-0.589165	-0.728618	-1.08611	-0.589075	-0.728528	-1.08602	-0.588985	-0.728438	-1.08593	-0.588895	-0.728348	-1.08584	-0.588805	-0.728258	-1.08575	-0.588715	-0.728168	-1.08566	-0.588625	-0.728078	-1.08557	-0.588535	-0.727988	-1.08548	-0.588445	-0.727898	-1.08539	-0.588355	-0.727808	-1.0853	-0.588265	-0.727718
ENSG00000197880	MDS2	0.377744	-0.151019	0.0214618	-0.18319	-0.802432	-0.133531	0.319557	-3.03601	-1.63755	-0.973715	1.14176	0.655763	-0.855372	-1.18121	-2.31236	-0.545399	-1.18112	-2.31227	-0.545309	-1.18103	-2.31218	-0.545219	-1.18094	-2.31209	-0.545129	-1.18085	-2.312	-0.545039	-1.18076	-2.31191	-0.544949	-1.18067	-2.31182	-0.544859	-1.18058	-2.31173	-0.544769	-1.18049	-2.31164	-0.544679	-1.1804	-2.31155	-0.544589	-1.18031	-2.31146	-0.544499	-1.18022	-2.31137
ENSG00000057757	PITHD1	0.45143	-0.226189	1.54468	0.581888	-1.62422	1.12192	1.11967	-1.99432	-1.78819	-0.028238	-0.489159	0.915374	-1.22347	0.499272	-2.87584	0.550011	0.499362	-2.87575	0.550101	0.499452	-2.87566	0.550191	0.499542	-2.87557	0.550281	0.499632	-2.87548	0.550371	0.499722	-2.87539	0.550461	0.499812	-2.8753	0.550551	0.499902	-2.87521	0.550641	0.499992	-2.87512	0.550731	0.500082	-2.87503	0.550821	0.500172	-2.87494	0.550911	0.500262	-2.87485
ENSG00000117308	GALE	-0.67393	0.714808	1.10323	-0.275906	0.642448	1.63491	-0.145681	0.476179	1.75801	0.41227	0.124291	-0.0248918	1.59468	1.89462	1.68206	-0.0365035	1.89471	1.68215	-0.0364135	1.8948	1.68224	-0.0363235	1.89489	1.68233	-0.0362335	1.89498	1.68242	-0.0361435	1.89507	1.68251	-0.0360535	1.89516	1.6826	-0.0359635	1.89525	1.68269	-0.0358735	1.89534	1.68278	-0.0357835	1.89543	1.68287	-0.0356935	1.89552	1.68296	-0.0356035	1.89561	1.68305
ENSG00000117305	HMGCL	-0.442142	-0.0274161	-1.24745	-2.85909	-0.889498	-1.28739	-0.910512	0.179573	0.371505	-1.41763	0.161044	-1.4373	-0.894144	0.0548601	0.32927	0.156448	0.0549501	0.32936	0.156538	0.0550401	0.32945	0.156628	0.0551301	0.32954	0.156718	0.0552201	0.32963	0.156808	0.0553101	0.32972	0.156898	0.0554001	0.32981	0.156988	0.0554901	0.3299	0.157078	0.0555801	0.32999	0.157168	0.0556701	0.33008	0.157258	0.0557601	0.33017	0.157348	0.0558501	0.33026
ENSG00000179163	FUCA1	-0.827059	-0.9936	-1.16237	-2.3565	0.118675	-0.373357	0.128214	1.0172	2.58131	-0.451434	-0.125549	-1.27844	0.52696	-0.00343364	-0.382049	-0.56111	-0.00334364	-0.381959	-0.56102	-0.00325364	-0.381869	-0.56093	-0.00316364	-0.381779	-0.56084	-0.00307364	-0.381689	-0.56075	-0.00298364	-0.381599	-0.56066	-0.00289364	-0.381509	-0.56057	-0.00280364	-0.381419	-0.56048	-0.00271364	-0.381329	-0.56039	-0.00262364	-0.381239	-0.5603	-0.00253364	-0.381149	-0.56021	-0.00244364	-0.381059
ENSG00000188822	CNR2	-0.926664	0.615795	0.241365	-1.76385	0.419739	-0.918961	-0.711454	-1.9847	0.379322	-0.428091	-0.0877226	2.41006	-1.33628	-2.02588	0.474317	0.276647	-2.02579	0.474407	0.276737	-2.0257	0.474497	0.276827	-2.02561	0.474587	0.276917	-2.02552	0.474677	0.277007	-2.02543	0.474767	0.277097	-2.02534	0.474857	0.277187	-2.02525	0.474947	0.277277	-2.02516	0.475037	0.277367	-2.02507	0.475127	0.277457	-2.02498	0.475217	0.277547	-2.02489	0.475307
ENSG00000229106	NA	-2.0658	-0.311315	0.335567	0.0223614	0.770819	-1.01821	-0.467242	-0.476068	0.487249	-0.953269	-0.92718	1.62174	-1.31098	-1.17915	1.00429	-0.563419	-1.17906	1.00438	-0.563329	-1.17897	1.00447	-0.563239	-1.17888	1.00456	-0.563149	-1.17879	1.00465	-0.563059	-1.1787	1.00474	-0.562969	-1.17861	1.00483	-0.562879	-1.17852	1.00492	-0.562789	-1.17843	1.00501	-0.562699	-1.17834	1.0051	-0.562609	-1.17825	1.00519	-0.562519	-1.17816	1.00528
ENSG00000189266	PNRC2	-0.0556867	-0.210069	-0.322622	0.864325	-0.683936	-0.983768	-0.437379	-0.500669	-0.381102	-0.481571	0.157431	-0.915717	-1.16285	-1.35163	-2.47501	-0.546935	-1.35154	-2.47492	-0.546845	-1.35145	-2.47483	-0.546755	-1.35136	-2.47474	-0.546665	-1.35127	-2.47465	-0.546575	-1.35118	-2.47456	-0.546485	-1.35109	-2.47447	-0.546395	-1.351	-2.47438	-0.546305	-1.35091	-2.47429	-0.546215	-1.35082	-2.4742	-0.546125	-1.35073	-2.47411	-0.546035	-1.35064	-2.47402
ENSG00000185436	IFNLR1	-1.3467	0.678729	0.137465	1.01026	-1.03674	-1.97947	0.357985	-1.02601	0.371299	-1.53447	-1.25502	2.01544	-1.01086	-0.706187	1.03144	-0.210789	-0.706097	1.03153	-0.210699	-0.706007	1.03162	-0.210609	-0.705917	1.03171	-0.210519	-0.705827	1.0318	-0.210429	-0.705737	1.03189	-0.210339	-0.705647	1.03198	-0.210249	-0.705557	1.03207	-0.210159	-0.705467	1.03216	-0.210069	-0.705377	1.03225	-0.209979	-0.705287	1.03234	-0.209889	-0.705197	1.03243
ENSG00000001460	STPG1	1.3059	-0.265533	1.07846	0.949673	-1.49049	-1.55329	0.218651	-0.949364	-0.921816	-1.12855	1.45683	0.951417	-1.29567	-1.71625	-0.141141	0.638282	-1.71616	-0.141051	0.638372	-1.71607	-0.140961	0.638462	-1.71598	-0.140871	0.638552	-1.71589	-0.140781	0.638642	-1.7158	-0.140691	0.638732	-1.71571	-0.140601	0.638822	-1.71562	-0.140511	0.638912	-1.71553	-0.140421	0.639002	-1.71544	-0.140331	0.639092	-1.71535	-0.140241	0.639182	-1.71526	-0.140151
ENSG00000001461	NIPAL3	-0.465991	-0.383816	-0.179448	0.621535	-1.78199	-0.380487	0.137916	-2.6588	-1.30105	-0.562747	0.849323	-0.26106	-1.14619	-1.56464	-1.73219	-0.180766	-1.56455	-1.7321	-0.180676	-1.56446	-1.73201	-0.180586	-1.56437	-1.73192	-0.180496	-1.56428	-1.73183	-0.180406	-1.56419	-1.73174	-0.180316	-1.5641	-1.73165	-0.180226	-1.56401	-1.73156	-0.180136	-1.56392	-1.73147	-0.180046	-1.56383	-1.73138	-0.179956	-1.56374	-1.73129	-0.179866	-1.56365	-1.7312
ENSG00000117602	RCAN3	0.462705	0.475857	0.45575	1.14544	-0.373187	0.248974	0.470196	-2.01574	-1.34158	-1.36101	0.466169	0.663671	-1.01109	-0.355077	-3.21051	-0.909972	-0.354987	-3.21042	-0.909882	-0.354897	-3.21033	-0.909792	-0.354807	-3.21024	-0.909702	-0.354717	-3.21015	-0.909612	-0.354627	-3.21006	-0.909522	-0.354537	-3.20997	-0.909432	-0.354447	-3.20988	-0.909342	-0.354357	-3.20979	-0.909252	-0.354267	-3.2097	-0.909162	-0.354177	-3.20961	-0.909072	-0.354087	-3.20952
ENSG00000169504	CLIC4	-1.20468	-1.78093	0.742117	-0.732408	-0.319318	0.429744	-0.299775	1.26014	2.23408	1.77804	-0.093289	0.230633	1.04625	0.979578	2.16899	0.426422	0.979668	2.16908	0.426512	0.979758	2.16917	0.426602	0.979848	2.16926	0.426692	0.979938	2.16935	0.426782	0.980028	2.16944	0.426872	0.980118	2.16953	0.426962	0.980208	2.16962	0.427052	0.980298	2.16971	0.427142	0.980388	2.1698	0.427232	0.980478	2.16989	0.427322	0.980568	2.16998
ENSG00000020633	RUNX3	0.194377	1.65742	-0.834704	0.763542	0.626981	0.958841	0.870282	-0.987932	-1.11313	-1.38618	-0.701351	0.349498	-0.652269	-2.82451	-2.42925	-0.43732	-2.82442	-2.42916	-0.43723	-2.82433	-2.42907	-0.43714	-2.82424	-2.42898	-0.43705	-2.82415	-2.42889	-0.43696	-2.82406	-2.4288	-0.43687	-2.82397	-2.42871	-0.43678	-2.82388	-2.42862	-0.43669	-2.82379	-2.42853	-0.4366	-2.8237	-2.42844	-0.43651	-2.82361	-2.42835	-0.43642	-2.82352	-2.42826
ENSG00000117616	RSRP1	-0.15641	-0.326599	-0.15638	1.78493	-0.00557484	-0.0529702	-0.118389	-0.883882	-1.57754	-0.477724	-0.58694	-0.252598	-1.03979	-2.19408	-1.46722	0.0483153	-2.19399	-1.46713	0.0484053	-2.1939	-1.46704	0.0484953	-2.19381	-1.46695	0.0485853	-2.19372	-1.46686	0.0486753	-2.19363	-1.46677	0.0487653	-2.19354	-1.46668	0.0488553	-2.19345	-1.46659	0.0489453	-2.19336	-1.4665	0.0490353	-2.19327	-1.46641	0.0491253	-2.19318	-1.46632	0.0492153	-2.19309	-1.46623
ENSG00000261349	NA	0.384933	0.2634	0.144699	0.69875	-0.37865	0.467359	0.364193	0.310786	0.769948	-0.222592	0.906499	-0.0433801	0.553481	0.0825546	0.581181	-0.0329247	0.0826446	0.581271	-0.0328347	0.0827346	0.581361	-0.0327447	0.0828246	0.581451	-0.0326547	0.0829146	0.581541	-0.0325647	0.0830046	0.581631	-0.0324747	0.0830946	0.581721	-0.0323847	0.0831846	0.581811	-0.0322947	0.0832746	0.581901	-0.0322047	0.0833646	0.581991	-0.0321147	0.0834546	0.582081	-0.0320247	0.0835446	0.582171
ENSG00000187010	RHD	0.200875	0.556674	0.489318	0.27783	0.111362	0.142418	0.232305	0.469803	0.810913	0.858159	0.611924	0.910812	0.598122	0.627435	1.25462	0.897821	0.627525	1.25471	0.897911	0.627615	1.2548	0.898001	0.627705	1.25489	0.898091	0.627795	1.25498	0.898181	0.627885	1.25507	0.898271	0.627975	1.25516	0.898361	0.628065	1.25525	0.898451	0.628155	1.25534	0.898541	0.628245	1.25543	0.898631	0.628335	1.25552	0.898721	0.628425	1.25561
ENSG00000183726	TMEM50A	0.903687	1.19309	0.0248358	-1.50881	0.248009	0.985075	0.714177	1.67551	1.76272	1.43569	0.213139	-0.485079	1.01428	0.556269	1.24776	0.753568	0.556359	1.24785	0.753658	0.556449	1.24794	0.753748	0.556539	1.24803	0.753838	0.556629	1.24812	0.753928	0.556719	1.24821	0.754018	0.556809	1.2483	0.754108	0.556899	1.24839	0.754198	0.556989	1.24848	0.754288	0.557079	1.24857	0.754378	0.557169	1.24866	0.754468	0.557259	1.24875
ENSG00000188672	RHCE	-0.186886	0.584158	0.49538	0.832385	-0.180554	-0.0799818	-0.018048	0.0595247	-0.371751	1.32582	1.12088	2.49396	2.06426	2.10207	0.721017	1.08271	2.10216	0.721107	1.0828	2.10225	0.721197	1.08289	2.10234	0.721287	1.08298	2.10243	0.721377	1.08307	2.10252	0.721467	1.08316	2.10261	0.721557	1.08325	2.1027	0.721647	1.08334	2.10279	0.721737	1.08343	2.10288	0.721827	1.08352	2.10297	0.721917	1.08361	2.10306	0.722007
ENSG00000157978	LDLRAP1	0.061052	0.0112036	0.0152121	-0.543316	-1.9199	-1.22886	0.190762	-2.4541	-0.255947	-1.2955	0.581173	-0.0933794	-0.660545	-0.207877	0.343778	-0.0458985	-0.207787	0.343868	-0.0458085	-0.207697	0.343958	-0.0457185	-0.207607	0.344048	-0.0456285	-0.207517	0.344138	-0.0455385	-0.207427	0.344228	-0.0454485	-0.207337	0.344318	-0.0453585	-0.207247	0.344408	-0.0452685	-0.207157	0.344498	-0.0451785	-0.207067	0.344588	-0.0450885	-0.206977	0.344678	-0.0449985	-0.206887	0.344768
ENSG00000117643	MAN1C1	0.187975	-0.0338673	-0.274531	-0.389117	-0.92669	-0.486309	0.348519	-1.48866	-2.29078	-1.92951	0.694946	-0.760828	-1.43903	-1.74544	-1.121	-0.636027	-1.74535	-1.12091	-0.635937	-1.74526	-1.12082	-0.635847	-1.74517	-1.12073	-0.635757	-1.74508	-1.12064	-0.635667	-1.74499	-1.12055	-0.635577	-1.7449	-1.12046	-0.635487	-1.74481	-1.12037	-0.635397	-1.74472	-1.12028	-0.635307	-1.74463	-1.12019	-0.635217	-1.74454	-1.1201	-0.635127	-1.74445	-1.12001
ENSG00000233478	NA	-0.136473	0.683316	0.796936	0.601581	-0.209289	-2.5779	-0.996299	-0.900087	-0.435246	-0.83432	0.15078	0.911219	-2.50759	-0.350211	0.609138	-1.74195	-0.350121	0.609228	-1.74186	-0.350031	0.609318	-1.74177	-0.349941	0.609408	-1.74168	-0.349851	0.609498	-1.74159	-0.349761	0.609588	-1.7415	-0.349671	0.609678	-1.74141	-0.349581	0.609768	-1.74132	-0.349491	0.609858	-1.74123	-0.349401	0.609948	-1.74114	-0.349311	0.610038	-1.74105	-0.349221	0.610128
ENSG00000162430	SELENON	-2.70731	-0.831394	-1.83583	0.00820902	0.820876	-0.758245	-0.0488069	0.882996	-1.03797	0.18563	-1.10552	0.24111	1.7582	1.02065	1.93141	-0.445951	1.02074	1.9315	-0.445861	1.02083	1.93159	-0.445771	1.02092	1.93168	-0.445681	1.02101	1.93177	-0.445591	1.0211	1.93186	-0.445501	1.02119	1.93195	-0.445411	1.02128	1.93204	-0.445321	1.02137	1.93213	-0.445231	1.02146	1.93222	-0.445141	1.02155	1.93231	-0.445051	1.02164	1.9324
ENSG00000228172	NA	0.509353	0.985454	0.494735	0.796917	-0.476648	-0.217371	-0.699344	-0.70289	0.46902	1.33269	0.828048	0.274665	-0.869181	0.299055	-0.6724	-0.35989	0.299145	-0.67231	-0.3598	0.299235	-0.67222	-0.35971	0.299325	-0.67213	-0.35962	0.299415	-0.67204	-0.35953	0.299505	-0.67195	-0.35944	0.299595	-0.67186	-0.35935	0.299685	-0.67177	-0.35926	0.299775	-0.67168	-0.35917	0.299865	-0.67159	-0.35908	0.299955	-0.6715	-0.35899	0.300045	-0.67141
ENSG00000182749	PAQR7	-0.214869	-2.91278	-0.241275	-0.799676	-0.330222	-0.694858	0.467571	1.21416	1.78612	0.985582	0.015021	1.32122	-0.868128	0.0833218	1.2741	0.209065	0.0834118	1.27419	0.209155	0.0835018	1.27428	0.209245	0.0835918	1.27437	0.209335	0.0836818	1.27446	0.209425	0.0837718	1.27455	0.209515	0.0838618	1.27464	0.209605	0.0839518	1.27473	0.209695	0.0840418	1.27482	0.209785	0.0841318	1.27491	0.209875	0.0842218	1.275	0.209965	0.0843118	1.27509
ENSG00000117632	STMN1	0.976554	0.352115	1.31009	1.31273	0.325047	2.37657	0.936945	-0.43235	0.385659	1.76583	1.43895	-0.0909825	1.12804	0.53142	-0.777758	1.07925	0.53151	-0.777668	1.07934	0.5316	-0.777578	1.07943	0.53169	-0.777488	1.07952	0.53178	-0.777398	1.07961	0.53187	-0.777308	1.0797	0.53196	-0.777218	1.07979	0.53205	-0.777128	1.07988	0.53214	-0.777038	1.07997	0.53223	-0.776948	1.08006	0.53232	-0.776858	1.08015	0.53241	-0.776768
ENSG00000158006	PAFAH2	0.8379	0.0854814	-0.859952	-0.535621	-0.700037	-0.162593	-0.133934	-0.510967	-0.996803	-1.48526	0.180257	-1.32241	-1.02617	-2.95377	-1.85183	-0.268065	-2.95368	-1.85174	-0.267975	-2.95359	-1.85165	-0.267885	-2.9535	-1.85156	-0.267795	-2.95341	-1.85147	-0.267705	-2.95332	-1.85138	-0.267615	-2.95323	-1.85129	-0.267525	-2.95314	-1.8512	-0.267435	-2.95305	-1.85111	-0.267345	-2.95296	-1.85102	-0.267255	-2.95287	-1.85093	-0.267165	-2.95278	-1.85084
ENSG00000175087	PDIK1L	-0.279989	-1.05491	0.509179	-0.662591	-1.83941	-0.888371	-0.896862	0.428573	0.0123647	-1.08514	0.602837	-1.1729	-0.276947	-2.51627	-2.05633	-0.381699	-2.51618	-2.05624	-0.381609	-2.51609	-2.05615	-0.381519	-2.516	-2.05606	-0.381429	-2.51591	-2.05597	-0.381339	-2.51582	-2.05588	-0.381249	-2.51573	-2.05579	-0.381159	-2.51564	-2.0557	-0.381069	-2.51555	-2.05561	-0.380979	-2.51546	-2.05552	-0.380889	-2.51537	-2.05543	-0.380799	-2.51528	-2.05534
ENSG00000142675	CNKSR1	0.4284	1.00405	2.04022	0.923911	0.330236	0.915862	-0.265013	0.759503	0.840772	0.17334	0.690138	0.345166	0.86145	0.915255	0.566485	0.595254	0.915345	0.566575	0.595344	0.915435	0.566665	0.595434	0.915525	0.566755	0.595524	0.915615	0.566845	0.595614	0.915705	0.566935	0.595704	0.915795	0.567025	0.595794	0.915885	0.567115	0.595884	0.915975	0.567205	0.595974	0.916065	0.567295	0.596064	0.916155	0.567385	0.596154	0.916245	0.567475
ENSG00000130695	CEP85	-2.6124	-1.95882	-0.397658	0.0743124	-0.567399	-0.903911	-0.248817	-0.0557902	-0.0112074	-1.03799	0.404735	-0.868018	-0.860615	-1.23557	-1.34463	-0.455297	-1.23548	-1.34454	-0.455207	-1.23539	-1.34445	-0.455117	-1.2353	-1.34436	-0.455027	-1.23521	-1.34427	-0.454937	-1.23512	-1.34418	-0.454847	-1.23503	-1.34409	-0.454757	-1.23494	-1.344	-0.454667	-1.23485	-1.34391	-0.454577	-1.23476	-1.34382	-0.454487	-1.23467	-1.34373	-0.454397	-1.23458	-1.34364
ENSG00000142669	SH3BGRL3	-0.116298	0.663035	-0.461354	-0.430326	1.05744	0.571025	0.247283	1.05757	1.13577	1.31622	0.121457	0.193847	1.68896	2.27223	1.79984	1.13177	2.27232	1.79993	1.13186	2.27241	1.80002	1.13195	2.2725	1.80011	1.13204	2.27259	1.8002	1.13213	2.27268	1.80029	1.13222	2.27277	1.80038	1.13231	2.27286	1.80047	1.1324	2.27295	1.80056	1.13249	2.27304	1.80065	1.13258	2.27313	1.80074	1.13267	2.27322	1.80083
ENSG00000158062	UBXN11	-2.27938	-2.27435	-1.26441	-1.47465	1.07343	-1.3627	-0.544574	0.90725	-0.560922	0.307336	0.0735733	1.11701	1.02214	-0.752146	0.902044	0.616382	-0.752056	0.902134	0.616472	-0.751966	0.902224	0.616562	-0.751876	0.902314	0.616652	-0.751786	0.902404	0.616742	-0.751696	0.902494	0.616832	-0.751606	0.902584	0.616922	-0.751516	0.902674	0.617012	-0.751426	0.902764	0.617102	-0.751336	0.902854	0.617192	-0.751246	0.902944	0.617282	-0.751156	0.903034
ENSG00000169442	CD52	1.89274	0.742855	0.644331	-0.251208	1.38758	0.380361	0.889652	-0.382191	-1.71371	0.822005	1.29618	-0.478237	0.497582	-3.13843	-1.60919	1.12006	-3.13834	-1.6091	1.12015	-3.13825	-1.60901	1.12024	-3.13816	-1.60892	1.12033	-3.13807	-1.60883	1.12042	-3.13798	-1.60874	1.12051	-3.13789	-1.60865	1.1206	-3.1378	-1.60856	1.12069	-3.13771	-1.60847	1.12078	-3.13762	-1.60838	1.12087	-3.13753	-1.60829	1.12096	-3.13744	-1.6082
ENSG00000176092	CRYBG2	-0.425415	0.490001	0.165524	0.832699	0.953357	-2.7803	0.476519	-2.43127	0.00485426	0.641329	-0.041774	0.767841	-1.14433	-1.23306	-0.747184	-0.553077	-1.23297	-0.747094	-0.552987	-1.23288	-0.747004	-0.552897	-1.23279	-0.746914	-0.552807	-1.2327	-0.746824	-0.552717	-1.23261	-0.746734	-0.552627	-1.23252	-0.746644	-0.552537	-1.23243	-0.746554	-0.552447	-1.23234	-0.746464	-0.552357	-1.23225	-0.746374	-0.552267	-1.23216	-0.746284	-0.552177	-1.23207	-0.746194
ENSG00000176083	ZNF683	0.979536	0.791789	0.983075	0.576535	-0.617422	-0.208308	0.461322	-0.740148	-0.618758	-0.0839714	0.174459	-0.935552	0.415397	-2.54976	-2.6995	0.42422	-2.54967	-2.69941	0.42431	-2.54958	-2.69932	0.4244	-2.54949	-2.69923	0.42449	-2.5494	-2.69914	0.42458	-2.54931	-2.69905	0.42467	-2.54922	-2.69896	0.42476	-2.54913	-2.69887	0.42485	-2.54904	-2.69878	0.42494	-2.54895	-2.69869	0.42503	-2.54886	-2.6986	0.42512	-2.54877	-2.69851
ENSG00000198830	HMGN2	1.11999	1.03461	0.49228	0.142686	0.398109	1.84276	0.346379	-0.314602	0.849495	0.894252	0.428439	0.174318	1.11177	3.38869	-1.29513	0.562749	3.38878	-1.29504	0.562839	3.38887	-1.29495	0.562929	3.38896	-1.29486	0.563019	3.38905	-1.29477	0.563109	3.38914	-1.29468	0.563199	3.38923	-1.29459	0.563289	3.38932	-1.2945	0.563379	3.38941	-1.29441	0.563469	3.3895	-1.29432	0.563559	3.38959	-1.29423	0.563649	3.38968	-1.29414
ENSG00000117676	RPS6KA1	-0.738555	-0.0239351	-2.19888	-1.95642	0.607173	-0.159409	0.618931	1.01769	1.03083	-0.888979	-0.546933	-0.730878	0.629922	0.423435	-0.632069	-0.123072	0.423525	-0.631979	-0.122982	0.423615	-0.631889	-0.122892	0.423705	-0.631799	-0.122802	0.423795	-0.631709	-0.122712	0.423885	-0.631619	-0.122622	0.423975	-0.631529	-0.122532	0.424065	-0.631439	-0.122442	0.424155	-0.631349	-0.122352	0.424245	-0.631259	-0.122262	0.424335	-0.631169	-0.122172	0.424425	-0.631079
ENSG00000060642	PIGV	-0.383616	-1.02532	-0.875177	-1.06822	-1.22946	-1.64424	-0.757301	0.893228	0.258643	-0.701787	0.481805	-2.93077	-0.839791	-0.982454	0.0756973	0.678454	-0.982364	0.0757873	0.678544	-0.982274	0.0758773	0.678634	-0.982184	0.0759673	0.678724	-0.982094	0.0760573	0.678814	-0.982004	0.0761473	0.678904	-0.981914	0.0762373	0.678994	-0.981824	0.0763273	0.679084	-0.981734	0.0764173	0.679174	-0.981644	0.0765073	0.679264	-0.981554	0.0765973	0.679354	-0.981464	0.0766873
ENSG00000204160	ZDHHC18	0.198589	0.70301	-1.57749	0.376373	1.20209	-0.327342	0.924946	-2.4427	-1.57372	-0.794682	0.249969	0.036937	0.854127	-0.305174	-2.66733	-0.929582	-0.305084	-2.66724	-0.929492	-0.304994	-2.66715	-0.929402	-0.304904	-2.66706	-0.929312	-0.304814	-2.66697	-0.929222	-0.304724	-2.66688	-0.929132	-0.304634	-2.66679	-0.929042	-0.304544	-2.6667	-0.928952	-0.304454	-2.66661	-0.928862	-0.304364	-2.66652	-0.928772	-0.304274	-2.66643	-0.928682	-0.304184	-2.66634
ENSG00000175707	KDF1	0.989695	0.716617	-0.56784	-0.14858	-0.351393	-0.900849	-0.92634	-2.84675	-1.11194	-0.752288	0.640427	0.911722	-0.704918	-0.508242	-2.43643	-0.497249	-0.508152	-2.43634	-0.497159	-0.508062	-2.43625	-0.497069	-0.507972	-2.43616	-0.496979	-0.507882	-2.43607	-0.496889	-0.507792	-2.43598	-0.496799	-0.507702	-2.43589	-0.496709	-0.507612	-2.4358	-0.496619	-0.507522	-2.43571	-0.496529	-0.507432	-2.43562	-0.496439	-0.507342	-2.43553	-0.496349	-0.507252	-2.43544
ENSG00000253368	TRNP1	-0.884825	1.22072	0.630622	-1.77081	0.594357	-0.464149	0.692109	-1.04409	0.613932	-0.824318	-0.296031	0.174273	1.00089	-0.265664	1.25256	-0.97542	-0.265574	1.25265	-0.97533	-0.265484	1.25274	-0.97524	-0.265394	1.25283	-0.97515	-0.265304	1.25292	-0.97506	-0.265214	1.25301	-0.97497	-0.265124	1.2531	-0.97488	-0.265034	1.25319	-0.97479	-0.264944	1.25328	-0.9747	-0.264854	1.25337	-0.97461	-0.264764	1.25346	-0.97452	-0.264674	1.25355
ENSG00000142784	WDTC1	-1.21701	0.490247	-0.812102	0.489963	1.38322	-0.608945	-0.306309	-0.210968	-3.89961	-1.23022	-0.422092	1.23552	0.867083	0.395161	0.641412	-0.128023	0.395251	0.641502	-0.127933	0.395341	0.641592	-0.127843	0.395431	0.641682	-0.127753	0.395521	0.641772	-0.127663	0.395611	0.641862	-0.127573	0.395701	0.641952	-0.127483	0.395791	0.642042	-0.127393	0.395881	0.642132	-0.127303	0.395971	0.642222	-0.127213	0.396061	0.642312	-0.127123	0.396151	0.642402
ENSG00000142765	SYTL1	0.298344	1.95629	-0.212859	0.041224	0.917242	0.381891	0.904448	-2.42444	-1.04777	-1.46441	0.833596	0.326024	-0.979325	-2.50695	-1.40681	0.191222	-2.50686	-1.40672	0.191312	-2.50677	-1.40663	0.191402	-2.50668	-1.40654	0.191492	-2.50659	-1.40645	0.191582	-2.5065	-1.40636	0.191672	-2.50641	-1.40627	0.191762	-2.50632	-1.40618	0.191852	-2.50623	-1.40609	0.191942	-2.50614	-1.406	0.192032	-2.50605	-1.40591	0.192122	-2.50596	-1.40582
ENSG00000142733	MAP3K6	-2.60317	-0.0432968	-0.62666	-0.787319	-0.361015	0.813332	-0.136668	2.53513	1.87146	-0.0962486	-0.0919212	-0.693019	1.24555	1.75438	1.18739	0.116058	1.75447	1.18748	0.116148	1.75456	1.18757	0.116238	1.75465	1.18766	0.116328	1.75474	1.18775	0.116418	1.75483	1.18784	0.116508	1.75492	1.18793	0.116598	1.75501	1.18802	0.116688	1.7551	1.18811	0.116778	1.75519	1.1882	0.116868	1.75528	1.18829	0.116958	1.75537	1.18838
ENSG00000158195	WASF2	-1.45448	-1.1725	-2.28309	-0.326034	1.55653	-1.41743	-0.233735	-0.0493044	-2.30201	-0.589755	-0.659997	0.941363	1.70698	0.611189	0.897134	-0.0803488	0.611279	0.897224	-0.0802588	0.611369	0.897314	-0.0801688	0.611459	0.897404	-0.0800788	0.611549	0.897494	-0.0799888	0.611639	0.897584	-0.0798988	0.611729	0.897674	-0.0798088	0.611819	0.897764	-0.0797188	0.611909	0.897854	-0.0796288	0.611999	0.897944	-0.0795388	0.612089	0.898034	-0.0794488	0.612179	0.898124
ENSG00000126705	AHDC1	1.01217	0.657442	-1.82614	1.30142	0.88048	-0.54666	-0.0228392	-0.941894	-2.8202	-1.26882	0.718642	0.356638	0.400332	-0.73538	-0.502168	0.223263	-0.73529	-0.502078	0.223353	-0.7352	-0.501988	0.223443	-0.73511	-0.501898	0.223533	-0.73502	-0.501808	0.223623	-0.73493	-0.501718	0.223713	-0.73484	-0.501628	0.223803	-0.73475	-0.501538	0.223893	-0.73466	-0.501448	0.223983	-0.73457	-0.501358	0.224073	-0.73448	-0.501268	0.224163	-0.73439	-0.501178
ENSG00000000938	FGR	-1.26466	-0.324833	-1.84656	-2.92658	0.610822	-0.489615	-0.0504214	2.64817	1.77025	-0.221141	-0.674652	-0.265173	0.623884	0.900713	0.669616	-0.312952	0.900803	0.669706	-0.312862	0.900893	0.669796	-0.312772	0.900983	0.669886	-0.312682	0.901073	0.669976	-0.312592	0.901163	0.670066	-0.312502	0.901253	0.670156	-0.312412	0.901343	0.670246	-0.312322	0.901433	0.670336	-0.312232	0.901523	0.670426	-0.312142	0.901613	0.670516	-0.312052	0.901703	0.670606
ENSG00000126709	IFI6	1.52865	2.92484	0.763743	-0.803715	-0.692809	0.453466	-0.330451	2.09066	2.68946	-0.181724	-0.134385	-0.816009	0.0819637	-0.914525	0.164675	-0.256359	-0.914435	0.164765	-0.256269	-0.914345	0.164855	-0.256179	-0.914255	0.164945	-0.256089	-0.914165	0.165035	-0.255999	-0.914075	0.165125	-0.255909	-0.913985	0.165215	-0.255819	-0.913895	0.165305	-0.255729	-0.913805	0.165395	-0.255639	-0.913715	0.165485	-0.255549	-0.913625	0.165575	-0.255459	-0.913535	0.165665
ENSG00000009780	FAM76A	-0.423042	0.21427	0.0990604	-0.667475	-0.0884484	-0.471031	0.38274	-0.303874	-1.96798	-0.136413	1.57367	-1.78189	-1.10788	-1.21016	-2.03742	-0.968136	-1.21007	-2.03733	-0.968046	-1.20998	-2.03724	-0.967956	-1.20989	-2.03715	-0.967866	-1.2098	-2.03706	-0.967776	-1.20971	-2.03697	-0.967686	-1.20962	-2.03688	-0.967596	-1.20953	-2.03679	-0.967506	-1.20944	-2.0367	-0.967416	-1.20935	-2.03661	-0.967326	-1.20926	-2.03652	-0.967236	-1.20917	-2.03643
ENSG00000117758	STX12	-0.57045	-0.315286	-1.31743	-1.95262	-0.802186	-0.586537	-1.39404	2.99657	1.36173	-0.124512	-0.23136	-1.40173	0.835051	0.245436	-0.238618	-0.169121	0.245526	-0.238528	-0.169031	0.245616	-0.238438	-0.168941	0.245706	-0.238348	-0.168851	0.245796	-0.238258	-0.168761	0.245886	-0.238168	-0.168671	0.245976	-0.238078	-0.168581	0.246066	-0.237988	-0.168491	0.246156	-0.237898	-0.168401	0.246246	-0.237808	-0.168311	0.246336	-0.237718	-0.168221	0.246426	-0.237628
ENSG00000117751	PPP1R8	-0.0793546	0.496957	0.190137	-0.67237	-0.566262	0.10535	-0.828651	0.927813	-1.29367	-0.134151	0.0928927	-2.78425	1.28265	-0.830017	-1.36002	0.643315	-0.829927	-1.35993	0.643405	-0.829837	-1.35984	0.643495	-0.829747	-1.35975	0.643585	-0.829657	-1.35966	0.643675	-0.829567	-1.35957	0.643765	-0.829477	-1.35948	0.643855	-0.829387	-1.35939	0.643945	-0.829297	-1.3593	0.644035	-0.829207	-1.35921	0.644125	-0.829117	-1.35912	0.644215	-0.829027	-1.35903
ENSG00000130775	THEMIS2	-1.25184	-0.771256	-1.57625	-2.00364	0.0374694	0.0857258	-0.984358	1.90459	2.10856	-0.669999	-1.06349	-0.443791	0.697112	1.21477	1.17535	-0.893202	1.21486	1.17544	-0.893112	1.21495	1.17553	-0.893022	1.21504	1.17562	-0.892932	1.21513	1.17571	-0.892842	1.21522	1.1758	-0.892752	1.21531	1.17589	-0.892662	1.2154	1.17598	-0.892572	1.21549	1.17607	-0.892482	1.21558	1.17616	-0.892392	1.21567	1.17625	-0.892302	1.21576	1.17634
ENSG00000117748	RPA2	1.20433	0.42217	0.17411	-1.69851	-0.713141	0.84781	0.00807601	-1.11731	-1.6749	-0.0745856	0.563406	-0.572936	-0.634564	-1.45242	-2.10657	0.414766	-1.45233	-2.10648	0.414856	-1.45224	-2.10639	0.414946	-1.45215	-2.1063	0.415036	-1.45206	-2.10621	0.415126	-1.45197	-2.10612	0.415216	-1.45188	-2.10603	0.415306	-1.45179	-2.10594	0.415396	-1.4517	-2.10585	0.415486	-1.45161	-2.10576	0.415576	-1.45152	-2.10567	0.415666	-1.45143	-2.10558
ENSG00000158156	XKR8	0.511982	0.407692	-0.763205	-1.31499	0.530204	1.45424	0.908307	1.71225	1.59746	-0.0744286	-0.0191833	-0.453758	1.02203	0.551626	0.673869	-0.601736	0.551716	0.673959	-0.601646	0.551806	0.674049	-0.601556	0.551896	0.674139	-0.601466	0.551986	0.674229	-0.601376	0.552076	0.674319	-0.601286	0.552166	0.674409	-0.601196	0.552256	0.674499	-0.601106	0.552346	0.674589	-0.601016	0.552436	0.674679	-0.600926	0.552526	0.674769	-0.600836	0.552616	0.674859
ENSG00000158161	EYA3	0.329143	-0.139286	0.318139	-0.125678	-1.05397	-0.612027	-0.749788	2.39173	1.41068	0.14552	-0.0732072	-1.34993	-0.983049	0.351364	-0.587664	-1.91761	0.351454	-0.587574	-1.91752	0.351544	-0.587484	-1.91743	0.351634	-0.587394	-1.91734	0.351724	-0.587304	-1.91725	0.351814	-0.587214	-1.91716	0.351904	-0.587124	-1.91707	0.351994	-0.587034	-1.91698	0.352084	-0.586944	-1.91689	0.352174	-0.586854	-1.9168	0.352264	-0.586764	-1.91671	0.352354	-0.586674
ENSG00000169403	PTAFR	-1.39972	-1.35944	-1.71695	-1.77909	0.603	-0.870311	-0.13882	1.41716	1.10808	0.813664	-0.293298	0.214695	1.63193	3.19234	0.621017	0.0795805	3.19243	0.621107	0.0796705	3.19252	0.621197	0.0797605	3.19261	0.621287	0.0798505	3.1927	0.621377	0.0799405	3.19279	0.621467	0.0800305	3.19288	0.621557	0.0801205	3.19297	0.621647	0.0802105	3.19306	0.621737	0.0803005	3.19315	0.621827	0.0803905	3.19324	0.621917	0.0804805	3.19333	0.622007
ENSG00000270605	NA	1.444	0.994065	0.274688	1.08401	0.694392	-0.127862	1.16989	-1.54193	0.219581	0.404164	0.562178	-0.270682	-2.15502	-2.35485	-0.538052	1.28499	-2.35476	-0.537962	1.28508	-2.35467	-0.537872	1.28517	-2.35458	-0.537782	1.28526	-2.35449	-0.537692	1.28535	-2.3544	-0.537602	1.28544	-2.35431	-0.537512	1.28553	-2.35422	-0.537422	1.28562	-2.35413	-0.537332	1.28571	-2.35404	-0.537242	1.2858	-2.35395	-0.537152	1.28589	-2.35386	-0.537062
ENSG00000130766	SESN2	-0.442162	-0.720806	-1.0714	1.67626	-0.274287	-0.280446	0.159124	-0.749329	-0.824963	-0.9444	-1.05965	-1.36287	-0.100168	-0.245118	-0.729466	-0.664554	-0.245028	-0.729376	-0.664464	-0.244938	-0.729286	-0.664374	-0.244848	-0.729196	-0.664284	-0.244758	-0.729106	-0.664194	-0.244668	-0.729016	-0.664104	-0.244578	-0.728926	-0.664014	-0.244488	-0.728836	-0.663924	-0.244398	-0.728746	-0.663834	-0.244308	-0.728656	-0.663744	-0.244218	-0.728566	-0.663654	-0.244128	-0.728476
ENSG00000130772	MED18	0.0456725	-0.504928	0.395323	-1.0477	-1.38796	0.16062	-0.985433	1.61486	-0.344349	-0.109321	0.0147375	-2.09465	-0.23998	-1.36086	-0.180671	0.329262	-1.36077	-0.180581	0.329352	-1.36068	-0.180491	0.329442	-1.36059	-0.180401	0.329532	-1.3605	-0.180311	0.329622	-1.36041	-0.180221	0.329712	-1.36032	-0.180131	0.329802	-1.36023	-0.180041	0.329892	-1.36014	-0.179951	0.329982	-1.36005	-0.179861	0.330072	-1.35996	-0.179771	0.330162	-1.35987	-0.179681
ENSG00000180198	RCC1	-0.123199	0.117764	1.18974	0.745332	0.674864	2.23574	0.838269	1.21478	0.441931	1.6366	0.866913	-1.12841	2.0087	0.318819	-0.364614	1.07079	0.318909	-0.364524	1.07088	0.318999	-0.364434	1.07097	0.319089	-0.364344	1.07106	0.319179	-0.364254	1.07115	0.319269	-0.364164	1.07124	0.319359	-0.364074	1.07133	0.319449	-0.363984	1.07142	0.319539	-0.363894	1.07151	0.319629	-0.363804	1.0716	0.319719	-0.363714	1.07169	0.319809	-0.363624
ENSG00000242125	SNHG3	1.42299	0.672273	0.406531	0.903828	0.117675	0.840354	0.484972	-1.12874	-0.990464	-0.345132	0.818879	0.593338	-0.962769	0.837279	-1.57895	0.149743	0.837369	-1.57886	0.149833	0.837459	-1.57877	0.149923	0.837549	-1.57868	0.150013	0.837639	-1.57859	0.150103	0.837729	-1.5785	0.150193	0.837819	-1.57841	0.150283	0.837909	-1.57832	0.150373	0.837999	-1.57823	0.150463	0.838089	-1.57814	0.150553	0.838179	-1.57805	0.150643	0.838269	-1.57796
ENSG00000197989	SNHG12	0.861268	0.226834	-0.413066	1.49338	-1.01819	-0.603287	-0.224706	-2.19547	-1.07487	-0.707428	0.00627337	-0.605915	-0.900833	-1.58626	-1.12871	-0.511309	-1.58617	-1.12862	-0.511219	-1.58608	-1.12853	-0.511129	-1.58599	-1.12844	-0.511039	-1.5859	-1.12835	-0.510949	-1.58581	-1.12826	-0.510859	-1.58572	-1.12817	-0.510769	-1.58563	-1.12808	-0.510679	-1.58554	-1.12799	-0.510589	-1.58545	-1.1279	-0.510499	-1.58536	-1.12781	-0.510409	-1.58527	-1.12772
ENSG00000120656	TAF12	1.31644	1.13731	-0.837847	-2.1932	0.571646	0.761873	0.117489	1.16826	0.939327	0.815971	0.908158	-2.1672	0.663142	0.369064	-0.892355	0.757744	0.369154	-0.892265	0.757834	0.369244	-0.892175	0.757924	0.369334	-0.892085	0.758014	0.369424	-0.891995	0.758104	0.369514	-0.891905	0.758194	0.369604	-0.891815	0.758284	0.369694	-0.891725	0.758374	0.369784	-0.891635	0.758464	0.369874	-0.891545	0.758554	0.369964	-0.891455	0.758644	0.370054	-0.891365
ENSG00000159023	EPB41	-0.924742	-0.57903	0.37707	0.838553	-1.14145	-1.05658	0.206157	-2.33671	-2.13823	-0.328077	0.0769883	2.44343	-0.750271	0.954718	-1.52302	1.07657	0.954808	-1.52293	1.07666	0.954898	-1.52284	1.07675	0.954988	-1.52275	1.07684	0.955078	-1.52266	1.07693	0.955168	-1.52257	1.07702	0.955258	-1.52248	1.07711	0.955348	-1.52239	1.0772	0.955438	-1.5223	1.07729	0.955528	-1.52221	1.07738	0.955618	-1.52212	1.07747	0.955708	-1.52203
ENSG00000225616	RPL27P4	0.610979	-0.0963892	0.420113	-0.0442847	-4.69851	0.390307	0.903646	-0.561747	-0.867815	0.420309	0.607683	-1.04225	-0.108885	0.0738858	-1.1082	0.540781	0.0739758	-1.10811	0.540871	0.0740658	-1.10802	0.540961	0.0741558	-1.10793	0.541051	0.0742458	-1.10784	0.541141	0.0743358	-1.10775	0.541231	0.0744258	-1.10766	0.541321	0.0745158	-1.10757	0.541411	0.0746058	-1.10748	0.541501	0.0746958	-1.10739	0.541591	0.0747858	-1.1073	0.541681	0.0748758	-1.10721
ENSG00000186056	MATN1-AS1	-0.810038	0.707834	-0.0938981	-0.160974	-0.749419	-0.248072	-0.510348	-2.05103	-1.26253	-2.03943	0.0442593	0.808058	-0.690949	-0.690675	-1.58438	-0.684256	-0.690585	-1.58429	-0.684166	-0.690495	-1.5842	-0.684076	-0.690405	-1.58411	-0.683986	-0.690315	-1.58402	-0.683896	-0.690225	-1.58393	-0.683806	-0.690135	-1.58384	-0.683716	-0.690045	-1.58375	-0.683626	-0.689955	-1.58366	-0.683536	-0.689865	-1.58357	-0.683446	-0.689775	-1.58348	-0.683356	-0.689685	-1.58339
ENSG00000162511	LAPTM5	-1.28687	-0.477588	-2.45806	-0.0347764	1.81173	0.189002	-0.121584	1.73837	1.05324	-0.575005	-1.55103	1.1461	1.85613	2.1075	0.720201	-1.13356	2.10759	0.720291	-1.13347	2.10768	0.720381	-1.13338	2.10777	0.720471	-1.13329	2.10786	0.720561	-1.1332	2.10795	0.720651	-1.13311	2.10804	0.720741	-1.13302	2.10813	0.720831	-1.13293	2.10822	0.720921	-1.13284	2.10831	0.721011	-1.13275	2.1084	0.721101	-1.13266	2.10849	0.721191
ENSG00000162512	SDC3	0.0815016	0.0597992	-0.333679	-1.76081	0.313963	0.660695	0.450815	0.925345	-0.897631	-0.204269	0.330354	0.139343	0.143208	-1.65001	2.19944	0.165187	-1.64992	2.19953	0.165277	-1.64983	2.19962	0.165367	-1.64974	2.19971	0.165457	-1.64965	2.1998	0.165547	-1.64956	2.19989	0.165637	-1.64947	2.19998	0.165727	-1.64938	2.20007	0.165817	-1.64929	2.20016	0.165907	-1.6492	2.20025	0.165997	-1.64911	2.20034	0.166087	-1.64902	2.20043
ENSG00000168528	SERINC2	-0.757199	-2.06199	-1.81225	-2.07602	1.41981	0.227158	0.473516	1.31597	-0.0529052	1.08955	0.160756	0.424554	1.44047	1.92505	0.0412991	0.405105	1.92514	0.0413891	0.405195	1.92523	0.0414791	0.405285	1.92532	0.0415691	0.405375	1.92541	0.0416591	0.405465	1.9255	0.0417491	0.405555	1.92559	0.0418391	0.405645	1.92568	0.0419291	0.405735	1.92577	0.0420191	0.405825	1.92586	0.0421091	0.405915	1.92595	0.0421991	0.406005	1.92604	0.0422891
ENSG00000121753	ADGRB2	-1.10878	-0.0926899	0.184136	-0.0614342	-0.795615	1.14781	0.441311	-1.97035	-1.61038	0.096827	-0.105943	0.245791	-2.77954	0.245809	-1.18278	0.237549	0.245899	-1.18269	0.237639	0.245989	-1.1826	0.237729	0.246079	-1.18251	0.237819	0.246169	-1.18242	0.237909	0.246259	-1.18233	0.237999	0.246349	-1.18224	0.238089	0.246439	-1.18215	0.238179	0.246529	-1.18206	0.238269	0.246619	-1.18197	0.238359	0.246709	-1.18188	0.238449	0.246799	-1.18179
ENSG00000134668	SPOCD1	-1.25273	0.980997	0.997405	0.757649	0.845261	0.125648	0.0921404	-0.400388	1.13265	1.21246	-0.945799	1.02366	0.0186881	2.25691	1.95678	1.25817	2.257	1.95687	1.25826	2.25709	1.95696	1.25835	2.25718	1.95705	1.25844	2.25727	1.95714	1.25853	2.25736	1.95723	1.25862	2.25745	1.95732	1.25871	2.25754	1.95741	1.2588	2.25763	1.9575	1.25889	2.25772	1.95759	1.25898	2.25781	1.95768	1.25907	2.2579	1.95777
ENSG00000160050	CCDC28B	1.01862	2.20813	0.248379	0.278644	0.831158	1.98948	0.38166	-1.94234	0.230842	0.601894	1.38719	-0.830504	0.719158	-1.39789	-0.802229	0.873752	-1.3978	-0.802139	0.873842	-1.39771	-0.802049	0.873932	-1.39762	-0.801959	0.874022	-1.39753	-0.801869	0.874112	-1.39744	-0.801779	0.874202	-1.39735	-0.801689	0.874292	-1.39726	-0.801599	0.874382	-1.39717	-0.801509	0.874472	-1.39708	-0.801419	0.874562	-1.39699	-0.801329	0.874652	-1.3969	-0.801239
ENSG00000160051	IQCC	-1.63169	-0.320264	1.08919	0.99052	-0.513353	0.312088	0.179188	-0.70121	-0.0656493	-0.929013	1.62369	0.0662263	-1.6328	0.28968	-2.47883	0.396424	0.28977	-2.47874	0.396514	0.28986	-2.47865	0.396604	0.28995	-2.47856	0.396694	0.29004	-2.47847	0.396784	0.29013	-2.47838	0.396874	0.29022	-2.47829	0.396964	0.29031	-2.4782	0.397054	0.2904	-2.47811	0.397144	0.29049	-2.47802	0.397234	0.29058	-2.47793	0.397324	0.29067	-2.47784
ENSG00000160055	TMEM234	0.00652935	1.44286	0.356191	-2.4146	0.206718	-0.497374	0.202472	1.9042	1.02628	-0.44341	1.44506	0.341467	-0.147059	0.42768	0.537827	0.238826	0.42777	0.537917	0.238916	0.42786	0.538007	0.239006	0.42795	0.538097	0.239096	0.42804	0.538187	0.239186	0.42813	0.538277	0.239276	0.42822	0.538367	0.239366	0.42831	0.538457	0.239456	0.4284	0.538547	0.239546	0.42849	0.538637	0.239636	0.42858	0.538727	0.239726	0.42867	0.538817
ENSG00000220785	NA	0.0411571	-0.0221702	2.59435	-1.15403	1.05271	-1.22736	-1.36869	-2.4586	-0.88023	0.978809	0.905538	-0.0657484	0.542209	1.169	-0.584664	1.50243	1.16909	-0.584574	1.50252	1.16918	-0.584484	1.50261	1.16927	-0.584394	1.5027	1.16936	-0.584304	1.50279	1.16945	-0.584214	1.50288	1.16954	-0.584124	1.50297	1.16963	-0.584034	1.50306	1.16972	-0.583944	1.50315	1.16981	-0.583854	1.50324	1.1699	-0.583764	1.50333	1.16999	-0.583674
ENSG00000182866	LCK	0.570956	1.20087	-0.122511	0.844433	0.148031	0.297179	0.766381	-2.66088	-1.27088	-0.235102	0.624634	-0.328934	-0.497324	-1.67168	-2.97891	0.536178	-1.67159	-2.97882	0.536268	-1.6715	-2.97873	0.536358	-1.67141	-2.97864	0.536448	-1.67132	-2.97855	0.536538	-1.67123	-2.97846	0.536628	-1.67114	-2.97837	0.536718	-1.67105	-2.97828	0.536808	-1.67096	-2.97819	0.536898	-1.67087	-2.9781	0.536988	-1.67078	-2.97801	0.537078	-1.67069	-2.97792
ENSG00000175130	MARCKSL1	-0.0686125	0.36436	-0.664418	0.780635	-0.553665	0.0409603	0.53251	-3.05345	-1.19833	-1.04837	-0.15256	0.28989	-0.178604	-0.638246	-1.03874	-0.343874	-0.638156	-1.03865	-0.343784	-0.638066	-1.03856	-0.343694	-0.637976	-1.03847	-0.343604	-0.637886	-1.03838	-0.343514	-0.637796	-1.03829	-0.343424	-0.637706	-1.0382	-0.343334	-0.637616	-1.03811	-0.343244	-0.637526	-1.03802	-0.343154	-0.637436	-1.03793	-0.343064	-0.637346	-1.03784	-0.342974	-0.637256	-1.03775
ENSG00000225828	FAM229A	-0.112936	1.41091	-1.12842	0.201559	-1.36433	-0.569788	0.402532	-1.79406	-1.89726	-0.56372	-0.59937	-0.653394	-0.458953	-0.770326	-0.697588	0.145377	-0.770236	-0.697498	0.145467	-0.770146	-0.697408	0.145557	-0.770056	-0.697318	0.145647	-0.769966	-0.697228	0.145737	-0.769876	-0.697138	0.145827	-0.769786	-0.697048	0.145917	-0.769696	-0.696958	0.146007	-0.769606	-0.696868	0.146097	-0.769516	-0.696778	0.146187	-0.769426	-0.696688	0.146277	-0.769336	-0.696598
ENSG00000176261	ZBTB8OS	1.84483	1.61409	0.991104	-0.291565	0.0428678	1.57197	0.131137	1.62976	0.481869	0.943603	0.929468	-0.19198	0.894783	0.0900142	0.05201	0.51562	0.0901042	0.0521	0.51571	0.0901942	0.05219	0.5158	0.0902842	0.05228	0.51589	0.0903742	0.05237	0.51598	0.0904642	0.05246	0.51607	0.0905542	0.05255	0.51616	0.0906442	0.05264	0.51625	0.0907342	0.05273	0.51634	0.0908242	0.05282	0.51643	0.0909142	0.05291	0.51652	0.0910042	0.053
ENSG00000162521	RBBP4	0.32073	-0.767868	0.295263	-1.99484	-1.03218	0.841828	0.465427	0.719842	-1.95622	0.576715	-0.0130782	-2.43142	0.735481	-1.05185	-2.55805	0.426552	-1.05176	-2.55796	0.426642	-1.05167	-2.55787	0.426732	-1.05158	-2.55778	0.426822	-1.05149	-2.55769	0.426912	-1.0514	-2.5576	0.427002	-1.05131	-2.55751	0.427092	-1.05122	-2.55742	0.427182	-1.05113	-2.55733	0.427272	-1.05104	-2.55724	0.427362	-1.05095	-2.55715	0.427452	-1.05086	-2.55706
ENSG00000116497	S100PBP	-0.637974	-1.19846	0.0919075	-0.166025	-1.0611	-0.8054	-0.848505	-0.158191	-0.180561	-0.346986	-0.0622449	-1.69487	-1.27165	-2.63284	-1.00305	0.228394	-2.63275	-1.00296	0.228484	-2.63266	-1.00287	0.228574	-2.63257	-1.00278	0.228664	-2.63248	-1.00269	0.228754	-2.63239	-1.0026	0.228844	-2.6323	-1.00251	0.228934	-2.63221	-1.00242	0.229024	-2.63212	-1.00233	0.229114	-2.63203	-1.00224	0.229204	-2.63194	-1.00215	0.229294	-2.63185	-1.00206
ENSG00000116514	RNF19B	-0.436682	0.29933	-0.840168	-0.601552	1.27113	1.20189	0.652614	0.0902772	-2.87709	0.0258817	-1.52882	0.318555	-0.169441	0.673747	0.549097	-0.510749	0.673837	0.549187	-0.510659	0.673927	0.549277	-0.510569	0.674017	0.549367	-0.510479	0.674107	0.549457	-0.510389	0.674197	0.549547	-0.510299	0.674287	0.549637	-0.510209	0.674377	0.549727	-0.510119	0.674467	0.549817	-0.510029	0.674557	0.549907	-0.509939	0.674647	0.549997	-0.509849	0.674737	0.550087
ENSG00000142920	AZIN2	-0.176086	-0.116498	-0.186656	0.916284	-0.986469	-0.392813	-0.450904	-2.7357	-1.77373	-1.28292	0.667999	0.00890443	-0.350846	-0.996832	-1.91085	-0.119094	-0.996742	-1.91076	-0.119004	-0.996652	-1.91067	-0.118914	-0.996562	-1.91058	-0.118824	-0.996472	-1.91049	-0.118734	-0.996382	-1.9104	-0.118644	-0.996292	-1.91031	-0.118554	-0.996202	-1.91022	-0.118464	-0.996112	-1.91013	-0.118374	-0.996022	-1.91004	-0.118284	-0.995932	-1.90995	-0.118194	-0.995842	-1.90986
ENSG00000116525	TRIM62	-0.516603	1.09698	-1.30558	0.854045	0.371725	-1.38176	-0.779126	-0.827523	-1.47055	-2.21253	-0.353605	0.69667	-0.304056	-0.870944	-1.64302	-0.454521	-0.870854	-1.64293	-0.454431	-0.870764	-1.64284	-0.454341	-0.870674	-1.64275	-0.454251	-0.870584	-1.64266	-0.454161	-0.870494	-1.64257	-0.454071	-0.870404	-1.64248	-0.453981	-0.870314	-1.64239	-0.453891	-0.870224	-1.6423	-0.453801	-0.870134	-1.64221	-0.453711	-0.870044	-1.64212	-0.453621	-0.869954	-1.64203
ENSG00000279179	NA	1.03794	0.991671	0.256217	1.40311	-0.135993	0.503914	0.716169	0.95757	1.11159	-0.224672	-0.788008	1.47465	0.786929	1.40073	-0.452588	0.0715711	1.40082	-0.452498	0.0716611	1.40091	-0.452408	0.0717511	1.401	-0.452318	0.0718411	1.40109	-0.452228	0.0719311	1.40118	-0.452138	0.0720211	1.40127	-0.452048	0.0721111	1.40136	-0.451958	0.0722011	1.40145	-0.451868	0.0722911	1.40154	-0.451778	0.0723811	1.40163	-0.451688	0.0724711	1.40172	-0.451598
ENSG00000160094	ZNF362	-1.67895	-1.79767	-1.60566	-0.21997	-0.0819482	-0.718869	-0.79318	0.131797	0.655084	-0.691238	0.574965	-0.792506	-0.0329009	-1.36175	-2.05049	0.020404	-1.36166	-2.0504	0.020494	-1.36157	-2.05031	0.020584	-1.36148	-2.05022	0.020674	-1.36139	-2.05013	0.020764	-1.3613	-2.05004	0.020854	-1.36121	-2.04995	0.020944	-1.36112	-2.04986	0.021034	-1.36103	-2.04977	0.021124	-1.36094	-2.04968	0.021214	-1.36085	-2.04959	0.021304	-1.36076	-2.0495
ENSG00000225313	NA	-0.10323	-0.0125447	-0.365685	-0.0203517	0.370691	-1.10554	0.604842	2.94021	0.236518	2.01421	-0.213409	1.27246	0.224849	-0.230792	2.03329	0.414701	-0.230702	2.03338	0.414791	-0.230612	2.03347	0.414881	-0.230522	2.03356	0.414971	-0.230432	2.03365	0.415061	-0.230342	2.03374	0.415151	-0.230252	2.03383	0.415241	-0.230162	2.03392	0.415331	-0.230072	2.03401	0.415421	-0.229982	2.0341	0.415511	-0.229892	2.03419	0.415601	-0.229802	2.03428
ENSG00000134686	PHC2	-0.581392	-0.293535	-1.0929	-0.772507	0.459012	0.242771	-0.307524	3.563	1.12381	0.245784	-1.02191	0.317773	1.86911	1.45338	1.37081	-0.263466	1.45347	1.3709	-0.263376	1.45356	1.37099	-0.263286	1.45365	1.37108	-0.263196	1.45374	1.37117	-0.263106	1.45383	1.37126	-0.263016	1.45392	1.37135	-0.262926	1.45401	1.37144	-0.262836	1.4541	1.37153	-0.262746	1.45419	1.37162	-0.262656	1.45428	1.37171	-0.262566	1.45437	1.3718
ENSG00000121903	ZSCAN20	-1.01722	0.0241042	0.152567	0.188731	0.317399	-1.63453	-0.627264	1.48992	-0.0987087	0.516349	-0.734016	-0.592375	0.342192	-1.49345	0.000271495	-1.83333	-1.49336	0.000361495	-1.83324	-1.49327	0.000451495	-1.83315	-1.49318	0.000541495	-1.83306	-1.49309	0.000631495	-1.83297	-1.493	0.000721495	-1.83288	-1.49291	0.000811495	-1.83279	-1.49282	0.000901495	-1.8327	-1.49273	0.000991495	-1.83261	-1.49264	0.0010815	-1.83252	-1.49255	0.0011715	-1.83243	-1.49246	0.0012615
ENSG00000163866	SMIM12	-0.08773	0.846843	-0.138715	-1.6808	0.20097	0.858472	0.20299	1.1414	1.81712	0.83263	0.309131	0.421919	0.482628	2.06204	0.215739	0.393921	2.06213	0.215829	0.394011	2.06222	0.215919	0.394101	2.06231	0.216009	0.394191	2.0624	0.216099	0.394281	2.06249	0.216189	0.394371	2.06258	0.216279	0.394461	2.06267	0.216369	0.394551	2.06276	0.216459	0.394641	2.06285	0.216549	0.394731	2.06294	0.216639	0.394821	2.06303	0.216729
ENSG00000163867	ZMYM6	-0.863005	-0.646873	0.489049	0.167164	-0.39338	-0.301526	-0.746294	0.426911	-0.797338	0.13777	0.788703	-0.259074	-2.01066	-2.20852	-1.25945	-0.874124	-2.20843	-1.25936	-0.874034	-2.20834	-1.25927	-0.873944	-2.20825	-1.25918	-0.873854	-2.20816	-1.25909	-0.873764	-2.20807	-1.259	-0.873674	-2.20798	-1.25891	-0.873584	-2.20789	-1.25882	-0.873494	-2.2078	-1.25873	-0.873404	-2.20771	-1.25864	-0.873314	-2.20762	-1.25855	-0.873224	-2.20753	-1.25846
ENSG00000197056	ZMYM1	0.614895	0.904175	0.305886	-1.31521	-0.904765	-0.415172	-0.0397451	-0.26335	-1.35891	-0.169229	1.1078	-0.410585	-1.44392	-3.18458	-1.99628	-0.413003	-3.18449	-1.99619	-0.412913	-3.1844	-1.9961	-0.412823	-3.18431	-1.99601	-0.412733	-3.18422	-1.99592	-0.412643	-3.18413	-1.99583	-0.412553	-3.18404	-1.99574	-0.412463	-3.18395	-1.99565	-0.412373	-3.18386	-1.99556	-0.412283	-3.18377	-1.99547	-0.412193	-3.18368	-1.99538	-0.412103	-3.18359	-1.99529
ENSG00000116560	SFPQ	-0.361227	-1.22327	-0.276663	2.0053	-0.126594	1.0201	0.0386012	0.00363875	-0.601023	-0.0331375	-0.713442	-0.233264	0.589128	0.706316	-2.24468	-0.511312	0.706406	-2.24459	-0.511222	0.706496	-2.2445	-0.511132	0.706586	-2.24441	-0.511042	0.706676	-2.24432	-0.510952	0.706766	-2.24423	-0.510862	0.706856	-2.24414	-0.510772	0.706946	-2.24405	-0.510682	0.707036	-2.24396	-0.510592	0.707126	-2.24387	-0.510502	0.707216	-2.24378	-0.510412	0.707306	-2.24369
ENSG00000020129	NCDN	-2.14278	-0.337078	-0.457605	-0.119891	1.11144	-1.03079	-0.241898	0.707448	-1.26559	-0.711419	0.162657	0.758405	2.08105	1.45206	-0.595666	0.383921	1.45215	-0.595576	0.384011	1.45224	-0.595486	0.384101	1.45233	-0.595396	0.384191	1.45242	-0.595306	0.384281	1.45251	-0.595216	0.384371	1.4526	-0.595126	0.384461	1.45269	-0.595036	0.384551	1.45278	-0.594946	0.384641	1.45287	-0.594856	0.384731	1.45296	-0.594766	0.384821	1.45305	-0.594676
ENSG00000239636	NA	1.37087	1.32715	-0.638996	-1.05714	-1.18391	0.407839	1.14829	-0.615658	0.509769	-0.33453	0.272962	0.770306	0.163135	-1.33422	-0.505918	0.537809	-1.33413	-0.505828	0.537899	-1.33404	-0.505738	0.537989	-1.33395	-0.505648	0.538079	-1.33386	-0.505558	0.538169	-1.33377	-0.505468	0.538259	-1.33368	-0.505378	0.538349	-1.33359	-0.505288	0.538439	-1.3335	-0.505198	0.538529	-1.33341	-0.505108	0.538619	-1.33332	-0.505018	0.538709	-1.33323	-0.504928
ENSG00000116819	TFAP2E	0.335762	0.100424	-2.28688	0.351245	-0.290293	0.0231173	-0.938109	0.0150219	-0.030905	-1.20276	-1.57956	0.901406	-0.131777	-1.38694	1.38445	-1.36982	-1.38685	1.38454	-1.36973	-1.38676	1.38463	-1.36964	-1.38667	1.38472	-1.36955	-1.38658	1.38481	-1.36946	-1.38649	1.3849	-1.36937	-1.3864	1.38499	-1.36928	-1.38631	1.38508	-1.36919	-1.38622	1.38517	-1.3691	-1.38613	1.38526	-1.36901	-1.38604	1.38535	-1.36892	-1.38595	1.38544
ENSG00000126067	PSMB2	0.644	0.670692	1.59532	-0.313009	0.0781659	2.03131	0.27231	2.0744	0.905708	1.2417	0.332445	-0.483502	1.28437	1.00173	-0.00530816	0.886802	1.00182	-0.00521816	0.886892	1.00191	-0.00512816	0.886982	1.002	-0.00503816	0.887072	1.00209	-0.00494816	0.887162	1.00218	-0.00485816	0.887252	1.00227	-0.00476816	0.887342	1.00236	-0.00467816	0.887432	1.00245	-0.00458816	0.887522	1.00254	-0.00449816	0.887612	1.00263	-0.00440816	0.887702	1.00272	-0.00431816
ENSG00000142686	C1orf216	-0.477737	1.73615	-1.56125	-0.0777792	0.112248	0.343549	0.296137	1.38134	1.27851	0.168941	0.520439	-0.0220467	0.754605	-0.384465	0.0675969	0.81373	-0.384375	0.0676869	0.81382	-0.384285	0.0677769	0.81391	-0.384195	0.0678669	0.814	-0.384105	0.0679569	0.81409	-0.384015	0.0680469	0.81418	-0.383925	0.0681369	0.81427	-0.383835	0.0682269	0.81436	-0.383745	0.0683169	0.81445	-0.383655	0.0684069	0.81454	-0.383565	0.0684969	0.81463	-0.383475	0.0685869
ENSG00000092853	CLSPN	0.675597	0.420857	1.30636	1.14269	0.659394	1.89925	0.74317	0.679458	0.715533	1.57835	1.28226	0.090222	1.13339	0.905876	0.604005	1.05509	0.905966	0.604095	1.05518	0.906056	0.604185	1.05527	0.906146	0.604275	1.05536	0.906236	0.604365	1.05545	0.906326	0.604455	1.05554	0.906416	0.604545	1.05563	0.906506	0.604635	1.05572	0.906596	0.604725	1.05581	0.906686	0.604815	1.0559	0.906776	0.604905	1.05599	0.906866	0.604995
ENSG00000134698	AGO4	-1.66682	-2.41501	-1.95412	-1.68034	0.370221	-0.451097	0.52717	1.84701	0.919765	0.278492	-0.73082	-1.25216	0.650427	-0.466011	-0.626296	-0.768842	-0.465921	-0.626206	-0.768752	-0.465831	-0.626116	-0.768662	-0.465741	-0.626026	-0.768572	-0.465651	-0.625936	-0.768482	-0.465561	-0.625846	-0.768392	-0.465471	-0.625756	-0.768302	-0.465381	-0.625666	-0.768212	-0.465291	-0.625576	-0.768122	-0.465201	-0.625486	-0.768032	-0.465111	-0.625396	-0.767942	-0.465021	-0.625306
ENSG00000092847	AGO1	-2.50275	-2.81677	-1.80297	-1.03225	0.920745	-0.840862	0.0222678	-0.115031	-0.445068	0.591223	-0.78731	-0.162806	1.38764	-0.639548	0.970154	-0.476116	-0.639458	0.970244	-0.476026	-0.639368	0.970334	-0.475936	-0.639278	0.970424	-0.475846	-0.639188	0.970514	-0.475756	-0.639098	0.970604	-0.475666	-0.639008	0.970694	-0.475576	-0.638918	0.970784	-0.475486	-0.638828	0.970874	-0.475396	-0.638738	0.970964	-0.475306	-0.638648	0.971054	-0.475216	-0.638558	0.971144
ENSG00000116863	ADPRS	0.25838	1.50276	-1.3471	0.114664	-1.42405	-1.48179	-1.77505	0.676333	1.30272	-1.48864	-0.600044	-1.34709	-0.868513	-1.17347	-1.43499	-0.668357	-1.17338	-1.4349	-0.668267	-1.17329	-1.43481	-0.668177	-1.1732	-1.43472	-0.668087	-1.17311	-1.43463	-0.667997	-1.17302	-1.43454	-0.667907	-1.17293	-1.43445	-0.667817	-1.17284	-1.43436	-0.667727	-1.17275	-1.43427	-0.667637	-1.17266	-1.43418	-0.667547	-1.17257	-1.43409	-0.667457	-1.17248	-1.434
ENSG00000171812	COL8A2	-1.2064	-0.163663	-0.516357	-0.830595	-0.0566152	-0.544536	-0.559042	1.57483	0.980056	-0.421053	-1.70223	-0.107164	1.61712	1.7719	1.71515	-1.86388	1.77199	1.71524	-1.86379	1.77208	1.71533	-1.8637	1.77217	1.71542	-1.86361	1.77226	1.71551	-1.86352	1.77235	1.7156	-1.86343	1.77244	1.71569	-1.86334	1.77253	1.71578	-1.86325	1.77262	1.71587	-1.86316	1.77271	1.71596	-1.86307	1.7728	1.71605	-1.86298	1.77289	1.71614
ENSG00000116871	MAP7D1	-1.41921	0.568981	-1.0974	0.471311	2.11732	0.330451	-0.0707712	0.576271	-3.06434	-0.632827	-0.409536	-0.328336	0.959287	0.88323	-0.429351	-0.335757	0.88332	-0.429261	-0.335667	0.88341	-0.429171	-0.335577	0.8835	-0.429081	-0.335487	0.88359	-0.428991	-0.335397	0.88368	-0.428901	-0.335307	0.88377	-0.428811	-0.335217	0.88386	-0.428721	-0.335127	0.88395	-0.428631	-0.335037	0.88404	-0.428541	-0.334947	0.88413	-0.428451	-0.334857	0.88422	-0.428361
ENSG00000196182	STK40	-2.59909	-0.784544	-1.73071	-0.556931	1.27888	-0.569465	0.30205	0.207595	1.50431	1.10004	-0.459903	0.398976	1.4194	1.21351	2.41326	0.52042	1.2136	2.41335	0.52051	1.21369	2.41344	0.5206	1.21378	2.41353	0.52069	1.21387	2.41362	0.52078	1.21396	2.41371	0.52087	1.21405	2.4138	0.52096	1.21414	2.41389	0.52105	1.21423	2.41398	0.52114	1.21432	2.41407	0.52123	1.21441	2.41416	0.52132	1.2145	2.41425
ENSG00000181817	LSM10	0.850146	1.0716	-0.476605	-2.64731	0.860146	0.300022	1.28178	0.0740676	1.53767	0.49884	0.191756	-0.079819	0.514852	1.64204	0.717229	0.496174	1.64213	0.717319	0.496264	1.64222	0.717409	0.496354	1.64231	0.717499	0.496444	1.6424	0.717589	0.496534	1.64249	0.717679	0.496624	1.64258	0.717769	0.496714	1.64267	0.717859	0.496804	1.64276	0.717949	0.496894	1.64285	0.718039	0.496984	1.64294	0.718129	0.497074	1.64303	0.718219
ENSG00000116898	MRPS15	1.68533	0.650777	1.12188	-0.162718	0.710176	1.84518	1.13138	1.11456	0.65222	0.750165	0.678842	0.333722	1.06644	1.44019	0.0691167	0.72456	1.44028	0.0692067	0.72465	1.44037	0.0692967	0.72474	1.44046	0.0693867	0.72483	1.44055	0.0694767	0.72492	1.44064	0.0695667	0.72501	1.44073	0.0696567	0.7251	1.44082	0.0697467	0.72519	1.44091	0.0698367	0.72528	1.441	0.0699267	0.72537	1.44109	0.0700167	0.72546	1.44118	0.0701067
ENSG00000119535	CSF3R	-1.92177	-1.89547	-2.1357	-1.56759	1.25074	-0.638563	-0.569999	1.7002	1.22215	0.291074	-0.800578	-0.211776	1.33065	0.531488	0.67503	-0.425972	0.531578	0.67512	-0.425882	0.531668	0.67521	-0.425792	0.531758	0.6753	-0.425702	0.531848	0.67539	-0.425612	0.531938	0.67548	-0.425522	0.532028	0.67557	-0.425432	0.532118	0.67566	-0.425342	0.532208	0.67575	-0.425252	0.532298	0.67584	-0.425162	0.532388	0.67593	-0.425072	0.532478	0.67602
ENSG00000233621	LINC01137	-0.436115	0.100607	0.622122	-1.38934	1.07498	1.26538	0.523852	-1.04969	0.910184	-2.761	0.472474	0.394516	0.744358	-0.0271322	-0.0675452	1.78632	-0.0270422	-0.0674552	1.78641	-0.0269522	-0.0673652	1.7865	-0.0268622	-0.0672752	1.78659	-0.0267722	-0.0671852	1.78668	-0.0266822	-0.0670952	1.78677	-0.0265922	-0.0670052	1.78686	-0.0265022	-0.0669152	1.78695	-0.0264122	-0.0668252	1.78704	-0.0263222	-0.0667352	1.78713	-0.0262322	-0.0666452	1.78722	-0.0261422	-0.0665552
ENSG00000163874	ZC3H12A	-0.906542	0.220971	-0.727596	1.7033	0.267252	0.0470931	0.101241	-0.72774	-0.000827444	-0.349305	-1.0526	0.26853	0.217302	0.0279411	-0.34732	-0.925004	0.0280311	-0.34723	-0.924914	0.0281211	-0.34714	-0.924824	0.0282111	-0.34705	-0.924734	0.0283011	-0.34696	-0.924644	0.0283911	-0.34687	-0.924554	0.0284811	-0.34678	-0.924464	0.0285711	-0.34669	-0.924374	0.0286611	-0.3466	-0.924284	0.0287511	-0.34651	-0.924194	0.0288411	-0.34642	-0.924104	0.0289311	-0.34633
ENSG00000163877	SNIP1	-0.305845	-0.217336	-0.259504	2.23447	-0.14352	0.751245	0.0662063	-0.9069	-0.2373	0.0430088	-0.521538	0.491575	0.336757	0.517714	-0.187549	-0.280587	0.517804	-0.187459	-0.280497	0.517894	-0.187369	-0.280407	0.517984	-0.187279	-0.280317	0.518074	-0.187189	-0.280227	0.518164	-0.187099	-0.280137	0.518254	-0.187009	-0.280047	0.518344	-0.186919	-0.279957	0.518434	-0.186829	-0.279867	0.518524	-0.186739	-0.279777	0.518614	-0.186649	-0.279687	0.518704	-0.186559
ENSG00000116922	C1orf109	0.106644	0.133656	-0.151623	0.499662	-1.03685	-1.70061	0.107586	-1.39383	-2.08062	-1.25397	-0.149745	-0.952801	-1.27905	-0.96849	-1.88284	0.0477692	-0.9684	-1.88275	0.0478592	-0.96831	-1.88266	0.0479492	-0.96822	-1.88257	0.0480392	-0.96813	-1.88248	0.0481292	-0.96804	-1.88239	0.0482192	-0.96795	-1.8823	0.0483092	-0.96786	-1.88221	0.0483992	-0.96777	-1.88212	0.0484892	-0.96768	-1.88203	0.0485792	-0.96759	-1.88194	0.0486692	-0.9675	-1.88185
ENSG00000134690	CDCA8	0.246552	0.349345	1.16547	1.55546	0.848277	1.92104	0.74002	0.304976	0.759635	1.56927	1.10178	-0.358626	1.6063	0.99582	0.15478	1.1129	0.99591	0.15487	1.11299	0.996	0.15496	1.11308	0.99609	0.15505	1.11317	0.99618	0.15514	1.11326	0.99627	0.15523	1.11335	0.99636	0.15532	1.11344	0.99645	0.15541	1.11353	0.99654	0.1555	1.11362	0.99663	0.15559	1.11371	0.99672	0.15568	1.1138	0.99681	0.15577
ENSG00000185090	MANEAL	0.986229	0.770767	-0.0569552	-0.324234	0.361234	-0.598054	2.04685	0.510054	-0.851909	-0.0262855	-0.860524	0.368963	0.154119	-2.26939	-0.568744	0.618589	-2.2693	-0.568654	0.618679	-2.26921	-0.568564	0.618769	-2.26912	-0.568474	0.618859	-2.26903	-0.568384	0.618949	-2.26894	-0.568294	0.619039	-2.26885	-0.568204	0.619129	-2.26876	-0.568114	0.619219	-2.26867	-0.568024	0.619309	-2.26858	-0.567934	0.619399	-2.26849	-0.567844	0.619489	-2.2684	-0.567754
ENSG00000196449	YRDC	-0.318302	0.610874	0.476981	1.69489	1.25518	1.83283	1.27662	-1.16107	-0.111846	0.569214	-0.47916	0.0136121	0.976938	1.15469	-1.40895	-0.270787	1.15478	-1.40886	-0.270697	1.15487	-1.40877	-0.270607	1.15496	-1.40868	-0.270517	1.15505	-1.40859	-0.270427	1.15514	-1.4085	-0.270337	1.15523	-1.40841	-0.270247	1.15532	-1.40832	-0.270157	1.15541	-1.40823	-0.270067	1.1555	-1.40814	-0.269977	1.15559	-1.40805	-0.269887	1.15568	-1.40796
ENSG00000197982	C1orf122	0.795158	1.67272	0.76343	0.273801	1.18956	1.3643	1.41156	0.789292	-0.166955	-0.306949	-0.213763	-0.113244	1.2459	1.67693	0.0524817	1.19339	1.67702	0.0525717	1.19348	1.67711	0.0526617	1.19357	1.6772	0.0527517	1.19366	1.67729	0.0528417	1.19375	1.67738	0.0529317	1.19384	1.67747	0.0530217	1.19393	1.67756	0.0531117	1.19402	1.67765	0.0532017	1.19411	1.67774	0.0532917	1.1942	1.67783	0.0533817	1.19429	1.67792	0.0534717
ENSG00000204084	INPP5B	-2.65836	-0.416089	-0.14365	-1.56422	-0.907791	0.00193104	-0.496285	-1.36898	1.1865	-0.377559	0.355506	-0.527658	-0.525842	-1.83758	0.0863992	-0.0652079	-1.83749	0.0864892	-0.0651179	-1.8374	0.0865792	-0.0650279	-1.83731	0.0866692	-0.0649379	-1.83722	0.0867592	-0.0648479	-1.83713	0.0868492	-0.0647579	-1.83704	0.0869392	-0.0646679	-1.83695	0.0870292	-0.0645779	-1.83686	0.0871192	-0.0644879	-1.83677	0.0872092	-0.0643979	-1.83668	0.0872992	-0.0643079	-1.83659	0.0873892
ENSG00000183386	FHL3	-1.66348	1.81245	-0.771072	-0.239614	-0.438163	0.708038	-0.796044	-0.512654	2.15557	0.383304	0.757654	-0.458562	0.689727	0.119442	0.973642	0.441067	0.119532	0.973732	0.441157	0.119622	0.973822	0.441247	0.119712	0.973912	0.441337	0.119802	0.974002	0.441427	0.119892	0.974092	0.441517	0.119982	0.974182	0.441607	0.120072	0.974272	0.441697	0.120162	0.974362	0.441787	0.120252	0.974452	0.441877	0.120342	0.974542	0.441967	0.120432	0.974632
ENSG00000183520	UTP11	1.2067	-0.587338	0.0626735	-1.2912	-1.66983	0.6669	-0.663083	0.84504	0.921469	1.6066	2.4151	-1.17811	-0.0185206	0.821086	-0.955715	0.522515	0.821176	-0.955625	0.522605	0.821266	-0.955535	0.522695	0.821356	-0.955445	0.522785	0.821446	-0.955355	0.522875	0.821536	-0.955265	0.522965	0.821626	-0.955175	0.523055	0.821716	-0.955085	0.523145	0.821806	-0.954995	0.523235	0.821896	-0.954905	0.523325	0.821986	-0.954815	0.523415	0.822076	-0.954725
ENSG00000185668	POU3F1	-0.712166	0.0845636	-1.19211	1.76808	-0.0985741	0.264222	0.417686	-1.90925	-0.970897	-0.455333	-0.74502	-0.072379	-0.507981	0.399113	-1.53516	-0.220884	0.399203	-1.53507	-0.220794	0.399293	-1.53498	-0.220704	0.399383	-1.53489	-0.220614	0.399473	-1.5348	-0.220524	0.399563	-1.53471	-0.220434	0.399653	-1.53462	-0.220344	0.399743	-1.53453	-0.220254	0.399833	-1.53444	-0.220164	0.399923	-1.53435	-0.220074	0.400013	-1.53426	-0.219984	0.400103	-1.53417
ENSG00000116954	RRAGC	1.67766	1.26648	-2.14393	-1.17554	0.952252	1.88256	0.917077	0.305108	0.0415991	1.06829	0.715777	0.950284	-0.147701	0.338021	-1.17163	-1.13112	0.338111	-1.17154	-1.13103	0.338201	-1.17145	-1.13094	0.338291	-1.17136	-1.13085	0.338381	-1.17127	-1.13076	0.338471	-1.17118	-1.13067	0.338561	-1.17109	-1.13058	0.338651	-1.171	-1.13049	0.338741	-1.17091	-1.1304	0.338831	-1.17082	-1.13031	0.338921	-1.17073	-1.13022	0.339011	-1.17064
ENSG00000214114	MYCBP	0.957508	0.0891724	0.199812	-1.48289	-0.0605694	0.656133	0.131333	1.91516	0.736111	1.63381	0.464225	-2.06985	0.870323	0.956871	-1.0946	0.200098	0.956961	-1.09451	0.200188	0.957051	-1.09442	0.200278	0.957141	-1.09433	0.200368	0.957231	-1.09424	0.200458	0.957321	-1.09415	0.200548	0.957411	-1.09406	0.200638	0.957501	-1.09397	0.200728	0.957591	-1.09388	0.200818	0.957681	-1.09379	0.200908	0.957771	-1.0937	0.200998	0.957861	-1.09361
ENSG00000168653	NDUFS5	2.23323	0.0958636	0.273589	1.32573	0.0159964	0.780064	0.932591	0.384016	0.29603	0.0923671	0.0260663	-0.95145	1.5849	1.37165	0.207302	0.155778	1.37174	0.207392	0.155868	1.37183	0.207482	0.155958	1.37192	0.207572	0.156048	1.37201	0.207662	0.156138	1.3721	0.207752	0.156228	1.37219	0.207842	0.156318	1.37228	0.207932	0.156408	1.37237	0.208022	0.156498	1.37246	0.208112	0.156588	1.37255	0.208202	0.156678	1.37264	0.208292
ENSG00000183682	BMP8A	-1.5881	0.939073	0.769001	0.097606	0.0618541	-0.645934	0.18661	0.26898	1.75056	-0.577554	0.307597	-0.643624	1.53793	0.0828612	2.85857	0.638123	0.0829512	2.85866	0.638213	0.0830412	2.85875	0.638303	0.0831312	2.85884	0.638393	0.0832212	2.85893	0.638483	0.0833112	2.85902	0.638573	0.0834012	2.85911	0.638663	0.0834912	2.8592	0.638753	0.0835812	2.85929	0.638843	0.0836712	2.85938	0.638933	0.0837612	2.85947	0.639023	0.0838512	2.85956
ENSG00000243970	PPIEL	-0.542042	-0.430162	-0.0752131	-0.698473	0.257678	-0.464344	1.57035	-2.7392	-0.487117	-2.2149	-0.392529	-0.422782	-0.106311	-1.70671	-0.135561	-0.371493	-1.70662	-0.135471	-0.371403	-1.70653	-0.135381	-0.371313	-1.70644	-0.135291	-0.371223	-1.70635	-0.135201	-0.371133	-1.70626	-0.135111	-0.371043	-1.70617	-0.135021	-0.370953	-1.70608	-0.134931	-0.370863	-1.70599	-0.134841	-0.370773	-1.7059	-0.134751	-0.370683	-1.70581	-0.134661	-0.370593	-1.70572	-0.134571
ENSG00000116983	HPCAL4	0.130378	-0.311341	0.681909	1.36537	-1.65376	-0.103975	0.0348566	-2.06334	-1.19054	-0.767062	0.698153	0.37831	-0.867054	0.38411	-1.8846	-0.861373	0.3842	-1.88451	-0.861283	0.38429	-1.88442	-0.861193	0.38438	-1.88433	-0.861103	0.38447	-1.88424	-0.861013	0.38456	-1.88415	-0.860923	0.38465	-1.88406	-0.860833	0.38474	-1.88397	-0.860743	0.38483	-1.88388	-0.860653	0.38492	-1.88379	-0.860563	0.38501	-1.8837	-0.860473	0.3851	-1.88361
ENSG00000116985	BMP8B	-0.614546	0.91766	2.17547	1.11797	-0.388587	-0.967017	-0.128607	1.88626	-0.464867	0.540221	-0.202409	0.473685	1.00055	1.56714	1.35716	-0.277929	1.56723	1.35725	-0.277839	1.56732	1.35734	-0.277749	1.56741	1.35743	-0.277659	1.5675	1.35752	-0.277569	1.56759	1.35761	-0.277479	1.56768	1.3577	-0.277389	1.56777	1.35779	-0.277299	1.56786	1.35788	-0.277209	1.56795	1.35797	-0.277119	1.56804	1.35806	-0.277029	1.56813	1.35815
ENSG00000043514	TRIT1	-1.11984	-2.56806	0.300853	-0.26638	-1.06908	-0.936052	-0.831384	-1.48789	0.769316	0.703083	0.936742	-0.893413	-0.0893969	-0.700671	-0.591657	-0.407568	-0.700581	-0.591567	-0.407478	-0.700491	-0.591477	-0.407388	-0.700401	-0.591387	-0.407298	-0.700311	-0.591297	-0.407208	-0.700221	-0.591207	-0.407118	-0.700131	-0.591117	-0.407028	-0.700041	-0.591027	-0.406938	-0.699951	-0.590937	-0.406848	-0.699861	-0.590847	-0.406758	-0.699771	-0.590757	-0.406668	-0.699681	-0.590667
ENSG00000116990	MYCL	-0.549974	-1.60616	-0.742749	-2.57134	0.0262492	-0.130799	0.0563322	0.115949	0.119193	-0.132177	-0.192522	-1.30592	0.0981979	-1.08302	-0.652461	-0.131419	-1.08293	-0.652371	-0.131329	-1.08284	-0.652281	-0.131239	-1.08275	-0.652191	-0.131149	-1.08266	-0.652101	-0.131059	-1.08257	-0.652011	-0.130969	-1.08248	-0.651921	-0.130879	-1.08239	-0.651831	-0.130789	-1.0823	-0.651741	-0.130699	-1.08221	-0.651651	-0.130609	-1.08212	-0.651561	-0.130519	-1.08203	-0.651471
ENSG00000168389	MFSD2A	-0.947876	-1.09334	-1.04696	2.11942	-0.825593	0.663625	-1.35077	0.441557	0.979851	0.00693067	-1.97343	0.54244	0.0981685	-0.298052	0.308967	-0.575241	-0.297962	0.309057	-0.575151	-0.297872	0.309147	-0.575061	-0.297782	0.309237	-0.574971	-0.297692	0.309327	-0.574881	-0.297602	0.309417	-0.574791	-0.297512	0.309507	-0.574701	-0.297422	0.309597	-0.574611	-0.297332	0.309687	-0.574521	-0.297242	0.309777	-0.574431	-0.297152	0.309867	-0.574341	-0.297062	0.309957
ENSG00000131236	CAP1	-0.907422	0.0901297	-1.48203	-1.47127	1.3074	0.996264	0.13768	1.7602	0.0533499	1.04955	0.0312017	-0.280582	1.47331	2.31187	0.276798	0.558444	2.31196	0.276888	0.558534	2.31205	0.276978	0.558624	2.31214	0.277068	0.558714	2.31223	0.277158	0.558804	2.31232	0.277248	0.558894	2.31241	0.277338	0.558984	2.3125	0.277428	0.559074	2.31259	0.277518	0.559164	2.31268	0.277608	0.559254	2.31277	0.277698	0.559344	2.31286	0.277788
ENSG00000131238	PPT1	-0.254138	-1.6103	-0.967357	-2.05526	0.283737	0.14294	-0.342876	2.37417	0.972568	-0.345435	-0.835737	-0.984083	0.996912	0.919383	-0.40655	-1.29317	0.919473	-0.40646	-1.29308	0.919563	-0.40637	-1.29299	0.919653	-0.40628	-1.2929	0.919743	-0.40619	-1.29281	0.919833	-0.4061	-1.29272	0.919923	-0.40601	-1.29263	0.920013	-0.40592	-1.29254	0.920103	-0.40583	-1.29245	0.920193	-0.40574	-1.29236	0.920283	-0.40565	-1.29227	0.920373	-0.40556
ENSG00000117000	RLF	-0.334925	-0.764025	-0.172155	1.81447	-0.582317	-0.212366	-0.626619	-0.585186	-0.0891618	-0.336453	-0.716807	0.106024	-0.742436	-0.144063	-1.48239	-0.69012	-0.143973	-1.4823	-0.69003	-0.143883	-1.48221	-0.68994	-0.143793	-1.48212	-0.68985	-0.143703	-1.48203	-0.68976	-0.143613	-1.48194	-0.68967	-0.143523	-1.48185	-0.68958	-0.143433	-1.48176	-0.68949	-0.143343	-1.48167	-0.6894	-0.143253	-1.48158	-0.68931	-0.143163	-1.48149	-0.68922	-0.143073	-1.4814
ENSG00000259943	NA	-0.0158093	0.882373	1.53602	-1.55719	-0.344645	-1.98492	-1.38783	-1.24673	-0.289998	0.78668	0.575229	-1.33068	-0.156327	1.02349	1.10052	1.96791	1.02358	1.10061	1.968	1.02367	1.1007	1.96809	1.02376	1.10079	1.96818	1.02385	1.10088	1.96827	1.02394	1.10097	1.96836	1.02403	1.10106	1.96845	1.02412	1.10115	1.96854	1.02421	1.10124	1.96863	1.0243	1.10133	1.96872	1.02439	1.10142	1.96881	1.02448	1.10151
ENSG00000084073	ZMPSTE24	-0.875794	-0.500689	0.107577	-1.03187	0.347856	1.15791	0.372458	2.76505	0.658041	1.53536	0.71168	-1.85218	1.03977	1.41205	-0.93444	0.223238	1.41214	-0.93435	0.223328	1.41223	-0.93426	0.223418	1.41232	-0.93417	0.223508	1.41241	-0.93408	0.223598	1.4125	-0.93399	0.223688	1.41259	-0.9339	0.223778	1.41268	-0.93381	0.223868	1.41277	-0.93372	0.223958	1.41286	-0.93363	0.224048	1.41295	-0.93354	0.224138	1.41304	-0.93345
ENSG00000049089	COL9A2	-0.697998	-0.413754	-0.700203	-0.597938	-0.593489	-1.401	-0.703465	-0.638433	-0.500124	-0.654936	-0.685239	3.33428	-0.671769	-1.85661	-0.588971	-0.299513	-1.85652	-0.588881	-0.299423	-1.85643	-0.588791	-0.299333	-1.85634	-0.588701	-0.299243	-1.85625	-0.588611	-0.299153	-1.85616	-0.588521	-0.299063	-1.85607	-0.588431	-0.298973	-1.85598	-0.588341	-0.298883	-1.85589	-0.588251	-0.298793	-1.8558	-0.588161	-0.298703	-1.85571	-0.588071	-0.298613	-1.85562	-0.587981
ENSG00000084070	SMAP2	-0.459915	-1.05277	-1.93365	-1.75866	-0.331682	-0.674899	-0.714814	4.00448	1.32958	-0.0778031	-0.708667	0.349339	0.720662	0.506818	0.230963	-0.587734	0.506908	0.231053	-0.587644	0.506998	0.231143	-0.587554	0.507088	0.231233	-0.587464	0.507178	0.231323	-0.587374	0.507268	0.231413	-0.587284	0.507358	0.231503	-0.587194	0.507448	0.231593	-0.587104	0.507538	0.231683	-0.587014	0.507628	0.231773	-0.586924	0.507718	0.231863	-0.586834	0.507808	0.231953
ENSG00000213172	NA	0.0674181	0.165316	-0.289669	-1.2664	-0.624182	-0.882122	0.321891	2.00127	2.0931	-0.693436	0.38242	-1.16081	1.1593	-1.77368	1.79108	0.526054	-1.77359	1.79117	0.526144	-1.7735	1.79126	0.526234	-1.77341	1.79135	0.526324	-1.77332	1.79144	0.526414	-1.77323	1.79153	0.526504	-1.77314	1.79162	0.526594	-1.77305	1.79171	0.526684	-1.77296	1.7918	0.526774	-1.77287	1.79189	0.526864	-1.77278	1.79198	0.526954	-1.77269	1.79207
ENSG00000187801	ZFP69B	1.50663	-3.00662	-0.409047	-0.232274	-1.36471	-1.59919	-1.42491	0.286938	0.600848	-1.46382	0.257148	-1.04549	-1.06826	-0.484375	0.34623	-0.107947	-0.484285	0.34632	-0.107857	-0.484195	0.34641	-0.107767	-0.484105	0.3465	-0.107677	-0.484015	0.34659	-0.107587	-0.483925	0.34668	-0.107497	-0.483835	0.34677	-0.107407	-0.483745	0.34686	-0.107317	-0.483655	0.34695	-0.107227	-0.483565	0.34704	-0.107137	-0.483475	0.34713	-0.107047	-0.483385	0.34722
ENSG00000187815	ZFP69	0.700565	1.22415	0.0354544	-1.23807	-1.02769	-0.210989	0.534144	0.167768	0.0860889	1.16487	0.547642	0.891564	-0.803352	-1.77268	-2.66206	0.217794	-1.77259	-2.66197	0.217884	-1.7725	-2.66188	0.217974	-1.77241	-2.66179	0.218064	-1.77232	-2.6617	0.218154	-1.77223	-2.66161	0.218244	-1.77214	-2.66152	0.218334	-1.77205	-2.66143	0.218424	-1.77196	-2.66134	0.218514	-1.77187	-2.66125	0.218604	-1.77178	-2.66116	0.218694	-1.77169	-2.66107
ENSG00000164002	EXO5	-0.36939	1.29467	0.705739	-0.682507	-1.63077	-1.26679	0.440476	0.248603	-0.0444348	-0.434503	1.2854	-0.222981	-0.67573	-3.50837	-1.10393	-0.160271	-3.50828	-1.10384	-0.160181	-3.50819	-1.10375	-0.160091	-3.5081	-1.10366	-0.160001	-3.50801	-1.10357	-0.159911	-3.50792	-1.10348	-0.159821	-3.50783	-1.10339	-0.159731	-3.50774	-1.1033	-0.159641	-3.50765	-1.10321	-0.159551	-3.50756	-1.10312	-0.159461	-3.50747	-1.10303	-0.159371	-3.50738	-1.10294
ENSG00000117010	ZNF684	1.46475	1.46711	-0.190883	-0.0325171	-2.25411	0.299946	-0.427284	1.60655	1.4329	-0.345047	-0.00593914	-1.21091	-2.30347	-1.25419	-1.70769	0.434579	-1.2541	-1.7076	0.434669	-1.25401	-1.70751	0.434759	-1.25392	-1.70742	0.434849	-1.25383	-1.70733	0.434939	-1.25374	-1.70724	0.435029	-1.25365	-1.70715	0.435119	-1.25356	-1.70706	0.435209	-1.25347	-1.70697	0.435299	-1.25338	-1.70688	0.435389	-1.25329	-1.70679	0.435479	-1.2532	-1.7067
ENSG00000117016	RIMS3	-0.56974	-1.77916	1.35387	1.52089	-0.735201	0.606368	0.850631	-1.86335	-0.535143	0.722922	0.0811077	-1.07809	-0.563448	-1.44583	0.0222647	0.77156	-1.44574	0.0223547	0.77165	-1.44565	0.0224447	0.77174	-1.44556	0.0225347	0.77183	-1.44547	0.0226247	0.77192	-1.44538	0.0227147	0.77201	-1.44529	0.0228047	0.7721	-1.4452	0.0228947	0.77219	-1.44511	0.0229847	0.77228	-1.44502	0.0230747	0.77237	-1.44493	0.0231647	0.77246	-1.44484	0.0232547
ENSG00000272145	NA	-0.164405	0.856097	0.731458	-1.93412	0.292886	1.01766	-2.19952	1.2901	1.07358	0.470738	0.862711	0.183437	0.769209	-1.02931	-0.961064	-1.04214	-1.02922	-0.960974	-1.04205	-1.02913	-0.960884	-1.04196	-1.02904	-0.960794	-1.04187	-1.02895	-0.960704	-1.04178	-1.02886	-0.960614	-1.04169	-1.02877	-0.960524	-1.0416	-1.02868	-0.960434	-1.04151	-1.02859	-0.960344	-1.04142	-1.0285	-0.960254	-1.04133	-1.02841	-0.960164	-1.04124	-1.02832	-0.960074
ENSG00000179862	CITED4	-0.162938	1.88321	0.937158	0.36563	0.769851	1.29367	-0.0238326	0.449282	2.68209	0.390485	0.209122	0.194701	0.156677	1.70392	1.20347	0.598016	1.70401	1.20356	0.598106	1.7041	1.20365	0.598196	1.70419	1.20374	0.598286	1.70428	1.20383	0.598376	1.70437	1.20392	0.598466	1.70446	1.20401	0.598556	1.70455	1.2041	0.598646	1.70464	1.20419	0.598736	1.70473	1.20428	0.598826	1.70482	1.20437	0.598916	1.70491	1.20446
ENSG00000171793	CTPS1	-0.694473	0.481399	0.740131	2.66541	-0.497419	2.50695	0.390698	-0.472751	-0.199662	0.748895	0.235748	-0.0809009	0.550572	-0.270753	-1.631	-0.236634	-0.270663	-1.63091	-0.236544	-0.270573	-1.63082	-0.236454	-0.270483	-1.63073	-0.236364	-0.270393	-1.63064	-0.236274	-0.270303	-1.63055	-0.236184	-0.270213	-1.63046	-0.236094	-0.270123	-1.63037	-0.236004	-0.270033	-1.63028	-0.235914	-0.269943	-1.63019	-0.235824	-0.269853	-1.6301	-0.235734	-0.269763	-1.63001
ENSG00000010803	SCMH1	-0.0853739	-1.1281	0.248284	1.30835	-1.53536	-0.626861	-0.998441	-2.34033	-0.723783	-1.25982	0.390226	0.0257057	-0.920497	0.769373	-1.79839	0.337422	0.769463	-1.7983	0.337512	0.769553	-1.79821	0.337602	0.769643	-1.79812	0.337692	0.769733	-1.79803	0.337782	0.769823	-1.79794	0.337872	0.769913	-1.79785	0.337962	0.770003	-1.79776	0.338052	0.770093	-1.79767	0.338142	0.770183	-1.79758	0.338232	0.770273	-1.79749	0.338322	0.770363	-1.7974
ENSG00000286640	NA	1.09419	-0.90697	-1.14115	-0.990504	-0.933565	1.11513	0.355943	-0.638685	-0.914087	-0.651889	0.938373	-0.687966	-1.93791	-1.90533	-1.32254	-0.341195	-1.90524	-1.32245	-0.341105	-1.90515	-1.32236	-0.341015	-1.90506	-1.32227	-0.340925	-1.90497	-1.32218	-0.340835	-1.90488	-1.32209	-0.340745	-1.90479	-1.322	-0.340655	-1.9047	-1.32191	-0.340565	-1.90461	-1.32182	-0.340475	-1.90452	-1.32173	-0.340385	-1.90443	-1.32164	-0.340295	-1.90434	-1.32155
ENSG00000127124	HIVEP3	-1.20021	0.397092	0.828341	0.0576707	0.3129	0.987361	0.159188	-2.02363	-1.8196	-0.0336043	-0.779331	0.354088	1.54125	-1.95598	-2.13742	0.416218	-1.95589	-2.13733	0.416308	-1.9558	-2.13724	0.416398	-1.95571	-2.13715	0.416488	-1.95562	-2.13706	0.416578	-1.95553	-2.13697	0.416668	-1.95544	-2.13688	0.416758	-1.95535	-2.13679	0.416848	-1.95526	-2.1367	0.416938	-1.95517	-2.13661	0.417028	-1.95508	-2.13652	0.417118	-1.95499	-2.13643
ENSG00000198815	FOXJ3	-0.862205	-1.47524	-0.556688	0.0374206	-1.11407	-1.36116	-0.707354	-0.726408	0.758597	-0.702779	-0.142348	-0.536104	-1.25963	-0.943081	-2.18017	-0.389904	-0.942991	-2.18008	-0.389814	-0.942901	-2.17999	-0.389724	-0.942811	-2.1799	-0.389634	-0.942721	-2.17981	-0.389544	-0.942631	-2.17972	-0.389454	-0.942541	-2.17963	-0.389364	-0.942451	-2.17954	-0.389274	-0.942361	-2.17945	-0.389184	-0.942271	-2.17936	-0.389094	-0.942181	-2.17927	-0.389004	-0.942091	-2.17918
ENSG00000186409	CCDC30	1.47172	0.580326	-0.156884	0.234091	-0.421948	0.0935877	0.786037	1.20286	0.371359	-1.69841	0.539512	1.36821	-1.47762	-0.114349	2.70313	-2.06758	-0.114259	2.70322	-2.06749	-0.114169	2.70331	-2.0674	-0.114079	2.7034	-2.06731	-0.113989	2.70349	-2.06722	-0.113899	2.70358	-2.06713	-0.113809	2.70367	-2.06704	-0.113719	2.70376	-2.06695	-0.113629	2.70385	-2.06686	-0.113539	2.70394	-2.06677	-0.113449	2.70403	-2.06668	-0.113359	2.70412
ENSG00000171960	PPIH	1.94622	0.916504	1.9663	-0.0743432	-1.04304	1.76937	0.967057	-2.0076	-1.71978	-0.284725	0.664503	-0.15875	0.681123	-0.291908	-2.50666	0.708247	-0.291818	-2.50657	0.708337	-0.291728	-2.50648	0.708427	-0.291638	-2.50639	0.708517	-0.291548	-2.5063	0.708607	-0.291458	-2.50621	0.708697	-0.291368	-2.50612	0.708787	-0.291278	-2.50603	0.708877	-0.291188	-2.50594	0.708967	-0.291098	-2.50585	0.709057	-0.291008	-2.50576	0.709147	-0.290918	-2.50567
ENSG00000065978	YBX1	0.723165	0.709752	-0.481049	1.09895	1.77765	1.12417	0.39586	0.65917	-3.66203	0.24789	0.507342	0.497725	1.50062	1.49193	-0.338812	0.363275	1.49202	-0.338722	0.363365	1.49211	-0.338632	0.363455	1.4922	-0.338542	0.363545	1.49229	-0.338452	0.363635	1.49238	-0.338362	0.363725	1.49247	-0.338272	0.363815	1.49256	-0.338182	0.363905	1.49265	-0.338092	0.363995	1.49274	-0.338002	0.364085	1.49283	-0.337912	0.364175	1.49292	-0.337822
ENSG00000164008	C1orf50	-1.9709	-0.17522	2.22207	-0.72807	-1.26229	0.937479	-0.654859	-0.480687	-0.778916	0.782638	-0.0296253	-0.570774	-0.093063	-2.41456	-0.258748	0.411407	-2.41447	-0.258658	0.411497	-2.41438	-0.258568	0.411587	-2.41429	-0.258478	0.411677	-2.4142	-0.258388	0.411767	-2.41411	-0.258298	0.411857	-2.41402	-0.258208	0.411947	-2.41393	-0.258118	0.412037	-2.41384	-0.258028	0.412127	-2.41375	-0.257938	0.412217	-2.41366	-0.257848	0.412307	-2.41357	-0.257758
ENSG00000177868	SVBP	2.08226	0.216132	-0.64512	-0.471303	0.170823	0.627967	1.91227	-0.917767	0.182735	1.02496	1.3489	-0.00725703	1.0771	1.63092	-0.622896	0.401996	1.63101	-0.622806	0.402086	1.6311	-0.622716	0.402176	1.63119	-0.622626	0.402266	1.63128	-0.622536	0.402356	1.63137	-0.622446	0.402446	1.63146	-0.622356	0.402536	1.63155	-0.622266	0.402626	1.63164	-0.622176	0.402716	1.63173	-0.622086	0.402806	1.63182	-0.621996	0.402896	1.63191	-0.621906
ENSG00000164010	ERMAP	-2.93035	-1.1258	-0.0774548	-1.28253	0.42308	-0.618685	0.466108	-0.159892	0.676616	0.774025	-0.097741	0.570282	-0.12706	2.38018	-1.40913	1.2762	2.38027	-1.40904	1.27629	2.38036	-1.40895	1.27638	2.38045	-1.40886	1.27647	2.38054	-1.40877	1.27656	2.38063	-1.40868	1.27665	2.38072	-1.40859	1.27674	2.38081	-1.4085	1.27683	2.3809	-1.40841	1.27692	2.38099	-1.40832	1.27701	2.38108	-1.40823	1.2771	2.38117	-1.40814
ENSG00000164011	ZNF691	0.612716	1.24484	-0.371635	-0.351594	-0.759906	-0.894165	-0.779164	0.0934079	-0.175776	-1.63676	1.10121	-0.843635	-1.11655	-2.96525	-0.0276387	0.17734	-2.96516	-0.0275487	0.17743	-2.96507	-0.0274587	0.17752	-2.96498	-0.0273687	0.17761	-2.96489	-0.0272787	0.1777	-2.9648	-0.0271887	0.17779	-2.96471	-0.0270987	0.17788	-2.96462	-0.0270087	0.17797	-2.96453	-0.0269187	0.17806	-2.96444	-0.0268287	0.17815	-2.96435	-0.0267387	0.17824	-2.96426	-0.0266487
ENSG00000117394	SLC2A1	-0.360216	0.333445	-0.410451	1.53994	-0.414418	0.339324	0.337633	-2.57465	0.144338	-0.638221	-1.01561	1.07501	-0.963098	-0.0931435	-2.32493	-0.429152	-0.0930535	-2.32484	-0.429062	-0.0929635	-2.32475	-0.428972	-0.0928735	-2.32466	-0.428882	-0.0927835	-2.32457	-0.428792	-0.0926935	-2.32448	-0.428702	-0.0926035	-2.32439	-0.428612	-0.0925135	-2.3243	-0.428522	-0.0924235	-2.32421	-0.428432	-0.0923335	-2.32412	-0.428342	-0.0922435	-2.32403	-0.428252	-0.0921535	-2.32394
ENSG00000117395	EBNA1BP2	1.40571	0.1145	1.87839	0.0202336	0.0329514	2.13722	0.546414	0.3957	-0.0202474	0.873546	0.930799	0.0244476	1.49005	1.56377	-1.52471	0.891086	1.56386	-1.52462	0.891176	1.56395	-1.52453	0.891266	1.56404	-1.52444	0.891356	1.56413	-1.52435	0.891446	1.56422	-1.52426	0.891536	1.56431	-1.52417	0.891626	1.5644	-1.52408	0.891716	1.56449	-1.52399	0.891806	1.56458	-1.5239	0.891896	1.56467	-1.52381	0.891986	1.56476	-1.52372
ENSG00000117400	MPL	-2.45582	0.669734	0.685303	1.68141	0.302645	-0.572869	0.00654069	-0.196221	0.345374	1.33134	1.67498	0.522966	1.72546	0.892098	1.89865	1.25741	0.892188	1.89874	1.2575	0.892278	1.89883	1.25759	0.892368	1.89892	1.25768	0.892458	1.89901	1.25777	0.892548	1.8991	1.25786	0.892638	1.89919	1.25795	0.892728	1.89928	1.25804	0.892818	1.89937	1.25813	0.892908	1.89946	1.25822	0.892998	1.89955	1.25831	0.893088	1.89964
ENSG00000117399	CDC20	0.629318	0.755026	1.19997	1.01028	0.615069	1.53265	0.889286	0.795759	0.983696	1.3305	1.06801	0.276314	1.28562	1.30403	0.489086	1.03974	1.30412	0.489176	1.03983	1.30421	0.489266	1.03992	1.3043	0.489356	1.04001	1.30439	0.489446	1.0401	1.30448	0.489536	1.04019	1.30457	0.489626	1.04028	1.30466	0.489716	1.04037	1.30475	0.489806	1.04046	1.30484	0.489896	1.04055	1.30493	0.489986	1.04064	1.30502	0.490076
ENSG00000066322	ELOVL1	-0.313643	1.17875	-1.12698	-2.26549	0.924883	-0.100449	-0.231871	1.56289	0.605451	0.477252	-0.285902	-0.0140259	1.22046	2.23458	0.0918758	0.219924	2.23467	0.0919658	0.220014	2.23476	0.0920558	0.220104	2.23485	0.0921458	0.220194	2.23494	0.0922358	0.220284	2.23503	0.0923258	0.220374	2.23512	0.0924158	0.220464	2.23521	0.0925058	0.220554	2.2353	0.0925958	0.220644	2.23539	0.0926858	0.220734	2.23548	0.0927758	0.220824	2.23557	0.0928658
ENSG00000159479	MED8	1.11017	0.577879	0.494965	-2.27003	-1.23368	0.114247	-0.596666	1.45118	1.99855	0.480642	0.717505	-0.871619	0.184505	0.985641	-0.193162	0.676458	0.985731	-0.193072	0.676548	0.985821	-0.192982	0.676638	0.985911	-0.192892	0.676728	0.986001	-0.192802	0.676818	0.986091	-0.192712	0.676908	0.986181	-0.192622	0.676998	0.986271	-0.192532	0.677088	0.986361	-0.192442	0.677178	0.986451	-0.192352	0.677268	0.986541	-0.192262	0.677358	0.986631	-0.192172
ENSG00000198198	SZT2	-0.807757	-0.260689	-0.138027	0.140423	-1.12296	-1.00125	0.256509	-0.663088	0.163513	-0.991515	-0.657459	1.19982	0.16513	-3.68345	0.891957	-1.00492	-3.68336	0.892047	-1.00483	-3.68327	0.892137	-1.00474	-3.68318	0.892227	-1.00465	-3.68309	0.892317	-1.00456	-3.683	0.892407	-1.00447	-3.68291	0.892497	-1.00438	-3.68282	0.892587	-1.00429	-3.68273	0.892677	-1.0042	-3.68264	0.892767	-1.00411	-3.68255	0.892857	-1.00402	-3.68246	0.892947
ENSG00000142949	PTPRF	-0.592105	-0.849875	-0.116582	0.303597	0.818199	0.360518	-0.136409	-0.654411	1.22604	1.21208	-0.378831	0.918899	1.47513	1.61921	2.64448	1.07269	1.6193	2.64457	1.07278	1.61939	2.64466	1.07287	1.61948	2.64475	1.07296	1.61957	2.64484	1.07305	1.61966	2.64493	1.07314	1.61975	2.64502	1.07323	1.61984	2.64511	1.07332	1.61993	2.6452	1.07341	1.62002	2.64529	1.0735	1.62011	2.64538	1.07359	1.6202	2.64547
ENSG00000066135	KDM4A	-2.13625	-0.503291	-0.487583	0.035596	0.239258	-1.20632	-0.0919903	0.0564665	2.90796	-1.03071	0.418569	-1.61833	-0.366353	-1.11728	-0.2773	-1.3523	-1.11719	-0.27721	-1.35221	-1.1171	-0.27712	-1.35212	-1.11701	-0.27703	-1.35203	-1.11692	-0.27694	-1.35194	-1.11683	-0.27685	-1.35185	-1.11674	-0.27676	-1.35176	-1.11665	-0.27667	-1.35167	-1.11656	-0.27658	-1.35158	-1.11647	-0.27649	-1.35149	-1.11638	-0.2764	-1.3514	-1.11629	-0.27631
ENSG00000126091	ST3GAL3	1.15968	-0.00994546	1.13516	0.227973	-0.528989	-2.37182	-0.447006	-1.79799	-0.844397	0.505863	-0.391745	1.32771	-1.0966	-0.388016	0.76461	0.286742	-0.387926	0.7647	0.286832	-0.387836	0.76479	0.286922	-0.387746	0.76488	0.287012	-0.387656	0.76497	0.287102	-0.387566	0.76506	0.287192	-0.387476	0.76515	0.287282	-0.387386	0.76524	0.287372	-0.387296	0.76533	0.287462	-0.387206	0.76542	0.287552	-0.387116	0.76551	0.287642	-0.387026	0.7656
ENSG00000132768	DPH2	-0.409955	0.846081	0.478285	0.0547021	-0.0525037	-0.00888278	0.282057	-0.723607	-1.08572	-0.202526	0.189734	-0.0992972	0.681651	2.73212	-2.89304	-0.100464	2.73221	-2.89295	-0.100374	2.7323	-2.89286	-0.100284	2.73239	-2.89277	-0.100194	2.73248	-2.89268	-0.100104	2.73257	-2.89259	-0.100014	2.73266	-2.8925	-0.0999243	2.73275	-2.89241	-0.0998343	2.73284	-2.89232	-0.0997443	2.73293	-2.89223	-0.0996543	2.73302	-2.89214	-0.0995643	2.73311	-2.89205
ENSG00000117410	ATP6V0B	-0.516612	0.307488	-0.479547	-0.967922	1.03808	0.828345	-0.00254952	2.31855	1.32624	0.765736	-0.408244	1.00819	1.54118	2.42763	0.898509	0.225275	2.42772	0.898599	0.225365	2.42781	0.898689	0.225455	2.4279	0.898779	0.225545	2.42799	0.898869	0.225635	2.42808	0.898959	0.225725	2.42817	0.899049	0.225815	2.42826	0.899139	0.225905	2.42835	0.899229	0.225995	2.42844	0.899319	0.226085	2.42853	0.899409	0.226175	2.42862	0.899499
ENSG00000117411	B4GALT2	-0.0270124	0.706199	0.914574	1.18873	0.369285	1.75112	1.01805	1.02576	-0.510497	0.495214	0.743323	1.41568	1.21318	1.20701	0.311815	1.12836	1.2071	0.311905	1.12845	1.20719	0.311995	1.12854	1.20728	0.312085	1.12863	1.20737	0.312175	1.12872	1.20746	0.312265	1.12881	1.20755	0.312355	1.1289	1.20764	0.312445	1.12899	1.20773	0.312535	1.12908	1.20782	0.312625	1.12917	1.20791	0.312715	1.12926	1.208	0.312805
ENSG00000159214	CCDC24	0.14083	1.35333	-0.392332	-1.21566	1.00952	-0.205572	1.00526	0.577458	0.675067	0.693276	1.20378	1.84592	0.963159	0.830638	1.03044	-0.262524	0.830728	1.03053	-0.262434	0.830818	1.03062	-0.262344	0.830908	1.03071	-0.262254	0.830998	1.0308	-0.262164	0.831088	1.03089	-0.262074	0.831178	1.03098	-0.261984	0.831268	1.03107	-0.261894	0.831358	1.03116	-0.261804	0.831448	1.03125	-0.261714	0.831538	1.03134	-0.261624	0.831628	1.03143
ENSG00000196517	SLC6A9	-0.333224	0.653239	1.41976	0.833851	-0.0982629	0.231644	0.28804	0.589103	0.870847	1.42602	0.703077	1.37138	0.980155	2.06238	0.866902	0.814806	2.06247	0.866992	0.814896	2.06256	0.867082	0.814986	2.06265	0.867172	0.815076	2.06274	0.867262	0.815166	2.06283	0.867352	0.815256	2.06292	0.867442	0.815346	2.06301	0.867532	0.815436	2.0631	0.867622	0.815526	2.06319	0.867712	0.815616	2.06328	0.867802	0.815706	2.06337	0.867892
ENSG00000126106	TMEM53	-0.883616	0.20021	-1.48107	-2.03601	0.507697	0.80215	-0.371968	0.610888	0.95777	1.06639	-0.300806	-0.907355	0.693208	0.283801	0.971156	0.91904	0.283891	0.971246	0.91913	0.283981	0.971336	0.91922	0.284071	0.971426	0.91931	0.284161	0.971516	0.9194	0.284251	0.971606	0.91949	0.284341	0.971696	0.91958	0.284431	0.971786	0.91967	0.284521	0.971876	0.91976	0.284611	0.971966	0.91985	0.284701	0.972056	0.91994	0.284791	0.972146
ENSG00000198520	ARMH1	0.222279	0.421458	0.945018	-0.262105	-0.238062	0.330125	0.14457	-2.88209	-0.590128	0.75838	0.226373	1.02275	1.35016	2.66071	-1.53618	1.15878	2.6608	-1.53609	1.15887	2.66089	-1.536	1.15896	2.66098	-1.53591	1.15905	2.66107	-1.53582	1.15914	2.66116	-1.53573	1.15923	2.66125	-1.53564	1.15932	2.66134	-1.53555	1.15941	2.66143	-1.53546	1.1595	2.66152	-1.53537	1.15959	2.66161	-1.53528	1.15968	2.6617	-1.53519
ENSG00000199377	RNU5F-1	1.16239	0.982842	0.344706	-0.997723	0.693858	1.30975	0.402848	0.431763	-0.529048	0.866175	0.433689	-0.81785	-0.331302	-0.327689	-0.952008	0.844539	-0.327599	-0.951918	0.844629	-0.327509	-0.951828	0.844719	-0.327419	-0.951738	0.844809	-0.327329	-0.951648	0.844899	-0.327239	-0.951558	0.844989	-0.327149	-0.951468	0.845079	-0.327059	-0.951378	0.845169	-0.326969	-0.951288	0.845259	-0.326879	-0.951198	0.845349	-0.326789	-0.951108	0.845439	-0.326699	-0.951018
ENSG00000200169	RNU5D-1	1.53361	0.713545	0.356866	-1.29351	0.0637112	1.24523	0.231388	0.906807	0.179672	0.453607	0.184492	-0.118035	-1.10292	-0.761385	-1.61548	0.0134274	-0.761295	-1.61539	0.0135174	-0.761205	-1.6153	0.0136074	-0.761115	-1.61521	0.0136974	-0.761025	-1.61512	0.0137874	-0.760935	-1.61503	0.0138774	-0.760845	-1.61494	0.0139674	-0.760755	-1.61485	0.0140574	-0.760665	-1.61476	0.0141474	-0.760575	-1.61467	0.0142374	-0.760485	-1.61458	0.0143274	-0.760395	-1.61449
ENSG00000142945	KIF2C	0.252791	0.321144	1.25969	1.05096	0.648262	1.61713	0.685777	0.694268	0.896401	1.41488	1.03772	0.222366	1.52796	1.17616	0.536342	1.19099	1.17625	0.536432	1.19108	1.17634	0.536522	1.19117	1.17643	0.536612	1.19126	1.17652	0.536702	1.19135	1.17661	0.536792	1.19144	1.1767	0.536882	1.19153	1.17679	0.536972	1.19162	1.17688	0.537062	1.19171	1.17697	0.537152	1.1918	1.17706	0.537242	1.19189	1.17715	0.537332
ENSG00000173846	PLK3	-1.25771	-0.722046	-0.693369	2.0846	0.647471	-0.366767	-0.430134	-0.375251	-0.44102	0.190521	-1.00185	0.671086	0.745206	0.638089	-0.170637	-0.359928	0.638179	-0.170547	-0.359838	0.638269	-0.170457	-0.359748	0.638359	-0.170367	-0.359658	0.638449	-0.170277	-0.359568	0.638539	-0.170187	-0.359478	0.638629	-0.170097	-0.359388	0.638719	-0.170007	-0.359298	0.638809	-0.169917	-0.359208	0.638899	-0.169827	-0.359118	0.638989	-0.169737	-0.359028	0.639079	-0.169647
ENSG00000188396	TCTEX1D4	-2.728	-0.295615	-0.705952	-0.236267	0.914771	0.0173443	-0.792783	0.982846	0.272453	-0.838562	-0.485672	1.20047	0.280477	0.952554	-0.667091	-0.245267	0.952644	-0.667001	-0.245177	0.952734	-0.666911	-0.245087	0.952824	-0.666821	-0.244997	0.952914	-0.666731	-0.244907	0.953004	-0.666641	-0.244817	0.953094	-0.666551	-0.244727	0.953184	-0.666461	-0.244637	0.953274	-0.666371	-0.244547	0.953364	-0.666281	-0.244457	0.953454	-0.666191	-0.244367	0.953544	-0.666101
ENSG00000222009	BTBD19	-0.929298	0.082843	-0.2959	1.5752	0.141383	-0.377086	-0.574236	0.594125	0.401923	-0.482968	-0.96598	0.739376	1.09444	0.00234949	-0.984758	-0.179831	0.00243949	-0.984668	-0.179741	0.00252949	-0.984578	-0.179651	0.00261949	-0.984488	-0.179561	0.00270949	-0.984398	-0.179471	0.00279949	-0.984308	-0.179381	0.00288949	-0.984218	-0.179291	0.00297949	-0.984128	-0.179201	0.00306949	-0.984038	-0.179111	0.00315949	-0.983948	-0.179021	0.00324949	-0.983858	-0.178931	0.00333949	-0.983768
ENSG00000117425	PTCH2	0.0678408	1.4131	-0.148297	1.94334	0.551355	-1.33966	0.181304	1.39757	-1.06984	-1.88894	1.12738	-0.412775	-1.19763	-0.351309	0.739923	-0.773785	-0.351219	0.740013	-0.773695	-0.351129	0.740103	-0.773605	-0.351039	0.740193	-0.773515	-0.350949	0.740283	-0.773425	-0.350859	0.740373	-0.773335	-0.350769	0.740463	-0.773245	-0.350679	0.740553	-0.773155	-0.350589	0.740643	-0.773065	-0.350499	0.740733	-0.772975	-0.350409	0.740823	-0.772885	-0.350319	0.740913
ENSG00000126107	HECTD3	-1.57785	0.385729	0.256611	-0.639229	-0.329338	-0.227746	0.228865	1.23793	1.49138	0.662285	-0.0349766	0.190366	0.369542	-0.895458	-0.0626807	1.05645	-0.895368	-0.0625907	1.05654	-0.895278	-0.0625007	1.05663	-0.895188	-0.0624107	1.05672	-0.895098	-0.0623207	1.05681	-0.895008	-0.0622307	1.0569	-0.894918	-0.0621407	1.05699	-0.894828	-0.0620507	1.05708	-0.894738	-0.0619607	1.05717	-0.894648	-0.0618707	1.05726	-0.894558	-0.0617807	1.05735	-0.894468	-0.0616907
ENSG00000162415	ZSWIM5	0.11251	0.172867	0.623467	-0.271499	-0.627155	-0.609891	1.21348	-1.65266	-0.933758	-0.468495	-0.521435	0.358816	-1.39325	-2.21935	-2.27761	0.485335	-2.21926	-2.27752	0.485425	-2.21917	-2.27743	0.485515	-2.21908	-2.27734	0.485605	-2.21899	-2.27725	0.485695	-2.2189	-2.27716	0.485785	-2.21881	-2.27707	0.485875	-2.21872	-2.27698	0.485965	-2.21863	-2.27689	0.486055	-2.21854	-2.2768	0.486145	-2.21845	-2.27671	0.486235	-2.21836	-2.27662
ENSG00000132781	MUTYH	-0.339008	1.06245	-0.0838671	0.867171	0.510167	0.441133	-0.131492	-0.814122	-0.310687	-0.434614	-0.612005	1.84459	-1.10087	-0.915302	-0.452568	-0.439675	-0.915212	-0.452478	-0.439585	-0.915122	-0.452388	-0.439495	-0.915032	-0.452298	-0.439405	-0.914942	-0.452208	-0.439315	-0.914852	-0.452118	-0.439225	-0.914762	-0.452028	-0.439135	-0.914672	-0.451938	-0.439045	-0.914582	-0.451848	-0.438955	-0.914492	-0.451758	-0.438865	-0.914402	-0.451668	-0.438775	-0.914312	-0.451578
ENSG00000132773	TOE1	0.321536	1.55963	-0.225879	1.7651	0.151491	1.33075	0.947775	-1.10682	-0.120438	-0.0568982	-1.12384	1.83059	-0.504685	-0.0791041	-1.59041	-0.954174	-0.0790141	-1.59032	-0.954084	-0.0789241	-1.59023	-0.953994	-0.0788341	-1.59014	-0.953904	-0.0787441	-1.59005	-0.953814	-0.0786541	-1.58996	-0.953724	-0.0785641	-1.58987	-0.953634	-0.0784741	-1.58978	-0.953544	-0.0783841	-1.58969	-0.953454	-0.0782941	-1.5896	-0.953364	-0.0782041	-1.58951	-0.953274	-0.0781141	-1.58942
ENSG00000070759	TESK2	-0.839782	0.304254	-1.79865	-0.364817	1.25496	-0.13962	-1.17528	-1.28614	0.1774	-0.475278	-0.992851	0.4753	1.25991	-2.23664	-0.276028	-0.745318	-2.23655	-0.275938	-0.745228	-2.23646	-0.275848	-0.745138	-2.23637	-0.275758	-0.745048	-2.23628	-0.275668	-0.744958	-2.23619	-0.275578	-0.744868	-2.2361	-0.275488	-0.744778	-2.23601	-0.275398	-0.744688	-2.23592	-0.275308	-0.744598	-2.23583	-0.275218	-0.744508	-2.23574	-0.275128	-0.744418	-2.23565	-0.275038
ENSG00000280670	CCDC163	-0.956587	0.0386442	0.480601	-0.309263	0.777294	-0.141413	0.852697	-0.798685	-0.858292	0.157212	-0.480661	-1.3293	0.760511	-0.528401	-0.593447	0.737655	-0.528311	-0.593357	0.737745	-0.528221	-0.593267	0.737835	-0.528131	-0.593177	0.737925	-0.528041	-0.593087	0.738015	-0.527951	-0.592997	0.738105	-0.527861	-0.592907	0.738195	-0.527771	-0.592817	0.738285	-0.527681	-0.592727	0.738375	-0.527591	-0.592637	0.738465	-0.527501	-0.592547	0.738555	-0.527411	-0.592457
ENSG00000117450	PRDX1	0.49626	0.641891	0.671192	-0.148918	0.0200397	1.73479	0.703616	1.26251	0.775684	1.48878	0.885206	-0.740378	1.43249	1.79056	0.524414	0.90431	1.79065	0.524504	0.9044	1.79074	0.524594	0.90449	1.79083	0.524684	0.90458	1.79092	0.524774	0.90467	1.79101	0.524864	0.90476	1.7911	0.524954	0.90485	1.79119	0.525044	0.90494	1.79128	0.525134	0.90503	1.79137	0.525224	0.90512	1.79146	0.525314	0.90521	1.79155	0.525404
ENSG00000132780	NASP	0.861373	0.463909	0.291823	2.00275	-0.898767	1.12082	-0.0252031	-0.0867929	-0.341984	0.784903	1.13229	-0.979949	-0.0307549	-1.18595	-1.54051	0.10736	-1.18586	-1.54042	0.10745	-1.18577	-1.54033	0.10754	-1.18568	-1.54024	0.10763	-1.18559	-1.54015	0.10772	-1.1855	-1.54006	0.10781	-1.18541	-1.53997	0.1079	-1.18532	-1.53988	0.10799	-1.18523	-1.53979	0.10808	-1.18514	-1.5397	0.10817	-1.18505	-1.53961	0.10826	-1.18496	-1.53952
ENSG00000159588	CCDC17	0.192684	-0.0892872	-0.994725	1.34767	1.23352	-0.245277	0.534188	0.315921	1.71116	-0.837955	-0.819495	0.40074	-3.18018	-0.470039	0.0753488	-1.0602	-0.469949	0.0754388	-1.06011	-0.469859	0.0755288	-1.06002	-0.469769	0.0756188	-1.05993	-0.469679	0.0757088	-1.05984	-0.469589	0.0757988	-1.05975	-0.469499	0.0758888	-1.05966	-0.469409	0.0759788	-1.05957	-0.469319	0.0760688	-1.05948	-0.469229	0.0761588	-1.05939	-0.469139	0.0762488	-1.0593	-0.469049	0.0763388
ENSG00000159596	TMEM69	1.06304	1.1589	-0.36274	-2.87234	-1.09414	-0.807381	-0.9581	0.561487	0.175068	0.727344	0.800778	-1.52335	0.0152776	-0.759307	-0.792369	0.526604	-0.759217	-0.792279	0.526694	-0.759127	-0.792189	0.526784	-0.759037	-0.792099	0.526874	-0.758947	-0.792009	0.526964	-0.758857	-0.791919	0.527054	-0.758767	-0.791829	0.527144	-0.758677	-0.791739	0.527234	-0.758587	-0.791649	0.527324	-0.758497	-0.791559	0.527414	-0.758407	-0.791469	0.527504	-0.758317	-0.791379
ENSG00000197429	IPP	0.971484	0.116756	0.0268089	0.35145	0.225597	1.72402	0.69106	-1.03413	-1.2073	0.114461	0.441648	-0.451031	0.309746	-3.303	-2.04885	0.255407	-3.30291	-2.04876	0.255497	-3.30282	-2.04867	0.255587	-3.30273	-2.04858	0.255677	-3.30264	-2.04849	0.255767	-3.30255	-2.0484	0.255857	-3.30246	-2.04831	0.255947	-3.30237	-2.04822	0.256037	-3.30228	-2.04813	0.256127	-3.30219	-2.04804	0.256217	-3.3021	-2.04795	0.256307	-3.30201	-2.04786
ENSG00000086015	MAST2	-1.67782	-2.28918	-0.768786	-0.310299	0.135879	0.571793	0.613684	2.09618	0.307084	0.743096	-0.9282	-0.759199	0.517337	-1.01484	1.06211	-0.74952	-1.01475	1.0622	-0.74943	-1.01466	1.06229	-0.74934	-1.01457	1.06238	-0.74925	-1.01448	1.06247	-0.74916	-1.01439	1.06256	-0.74907	-1.0143	1.06265	-0.74898	-1.01421	1.06274	-0.74889	-1.01412	1.06283	-0.7488	-1.01403	1.06292	-0.74871	-1.01394	1.06301	-0.74862	-1.01385	1.0631
ENSG00000117461	PIK3R3	0.459516	-0.355976	-0.24785	-0.785641	-1.1141	1.46484	1.63206	0.161753	0.797245	0.81187	0.582464	-0.0812189	0.0929178	-1.33498	-0.677589	0.335041	-1.33489	-0.677499	0.335131	-1.3348	-0.677409	0.335221	-1.33471	-0.677319	0.335311	-1.33462	-0.677229	0.335401	-1.33453	-0.677139	0.335491	-1.33444	-0.677049	0.335581	-1.33435	-0.676959	0.335671	-1.33426	-0.676869	0.335761	-1.33417	-0.676779	0.335851	-1.33408	-0.676689	0.335941	-1.33399	-0.676599
ENSG00000085999	RAD54L	0.336001	0.768832	1.21121	1.27196	0.549992	1.7387	0.795258	0.643983	0.851721	1.40688	1.12	0.0277604	1.28344	0.727289	0.585007	1.4324	0.727379	0.585097	1.43249	0.727469	0.585187	1.43258	0.727559	0.585277	1.43267	0.727649	0.585367	1.43276	0.727739	0.585457	1.43285	0.727829	0.585547	1.43294	0.727919	0.585637	1.43303	0.728009	0.585727	1.43312	0.728099	0.585817	1.43321	0.728189	0.585907	1.4333	0.728279	0.585997
ENSG00000173660	UQCRH	1.30263	0.485218	1.17221	0.0622483	0.188922	1.69283	0.753311	0.831091	0.368543	1.30917	0.667032	-0.0520954	1.08435	2.15965	0.943732	1.12083	2.15974	0.943822	1.12092	2.15983	0.943912	1.12101	2.15992	0.944002	1.1211	2.16001	0.944092	1.12119	2.1601	0.944182	1.12128	2.16019	0.944272	1.12137	2.16028	0.944362	1.12146	2.16037	0.944452	1.12155	2.16046	0.944542	1.12164	2.16055	0.944632	1.12173	2.16064	0.944722
ENSG00000117481	NSUN4	-0.181453	-0.202861	-0.0166157	0.536915	-1.18121	-0.921519	-1.18283	-1.09385	0.31163	-1.28412	-0.318314	-1.17629	-0.746466	-0.599589	-2.21041	-1.1118	-0.599499	-2.21032	-1.11171	-0.599409	-2.21023	-1.11162	-0.599319	-2.21014	-1.11153	-0.599229	-2.21005	-1.11144	-0.599139	-2.20996	-1.11135	-0.599049	-2.20987	-1.11126	-0.598959	-2.20978	-1.11117	-0.598869	-2.20969	-1.11108	-0.598779	-2.2096	-1.11099	-0.598689	-2.20951	-1.1109	-0.598599	-2.20942
ENSG00000117480	FAAH	-1.43631	-2.56206	-0.292949	-0.541336	0.581762	-1.62085	-0.269651	-0.562802	-0.490437	-0.757975	0.00223694	-0.485499	0.331405	-1.37269	-1.46764	-0.611435	-1.3726	-1.46755	-0.611345	-1.37251	-1.46746	-0.611255	-1.37242	-1.46737	-0.611165	-1.37233	-1.46728	-0.611075	-1.37224	-1.46719	-0.610985	-1.37215	-1.4671	-0.610895	-1.37206	-1.46701	-0.610805	-1.37197	-1.46692	-0.610715	-1.37188	-1.46683	-0.610625	-1.37179	-1.46674	-0.610535	-1.3717	-1.46665
ENSG00000232022	NA	0.692111	0.630533	1.1505	0.254952	-1.08829	0.82156	0.526885	-0.0987625	-2.60789	-0.287357	0.424983	-1.3944	-0.319675	-1.80417	-2.61714	0.303506	-1.80408	-2.61705	0.303596	-1.80399	-2.61696	0.303686	-1.8039	-2.61687	0.303776	-1.80381	-2.61678	0.303866	-1.80372	-2.61669	0.303956	-1.80363	-2.6166	0.304046	-1.80354	-2.61651	0.304136	-1.80345	-2.61642	0.304226	-1.80336	-2.61633	0.304316	-1.80327	-2.61624	0.304406	-1.80318	-2.61615
ENSG00000079277	MKNK1	-0.0238145	-0.138008	-0.913872	-1.55883	0.313382	0.196598	-0.527425	1.56909	2.44569	0.622637	-0.302348	-0.4195	0.94049	3.16933	0.567462	-0.426987	3.16942	0.567552	-0.426897	3.16951	0.567642	-0.426807	3.1696	0.567732	-0.426717	3.16969	0.567822	-0.426627	3.16978	0.567912	-0.426537	3.16987	0.568002	-0.426447	3.16996	0.568092	-0.426357	3.17005	0.568182	-0.426267	3.17014	0.568272	-0.426177	3.17023	0.568362	-0.426087	3.17032	0.568452
ENSG00000142961	MOB3C	-1.90915	-0.533193	-0.339506	-0.701847	-1.08656	-1.33459	-0.689312	0.00608939	0.770147	-0.84539	-0.315146	-1.78926	-0.953534	-2.05721	1.11146	-0.143115	-2.05712	1.11155	-0.143025	-2.05703	1.11164	-0.142935	-2.05694	1.11173	-0.142845	-2.05685	1.11182	-0.142755	-2.05676	1.11191	-0.142665	-2.05667	1.112	-0.142575	-2.05658	1.11209	-0.142485	-2.05649	1.11218	-0.142395	-2.0564	1.11227	-0.142305	-2.05631	1.11236	-0.142215	-2.05622	1.11245
ENSG00000162366	PDZK1IP1	-0.709895	0.835856	0.10296	0.317439	0.428623	-0.948638	0.068098	-1.67885	0.104125	0.707096	0.477366	1.04625	-0.447693	2.07773	1.25072	1.28571	2.07782	1.25081	1.2858	2.07791	1.2509	1.28589	2.078	1.25099	1.28598	2.07809	1.25108	1.28607	2.07818	1.25117	1.28616	2.07827	1.25126	1.28625	2.07836	1.25135	1.28634	2.07845	1.25144	1.28643	2.07854	1.25153	1.28652	2.07863	1.25162	1.28661	2.07872	1.25171
ENSG00000162367	TAL1	-1.72757	-0.0985085	1.12647	0.0979071	0.0818444	-1.48589	-0.268732	-0.183003	1.46293	1.38319	0.486642	0.274802	0.532606	2.43002	2.45276	1.47279	2.43011	2.45285	1.47288	2.4302	2.45294	1.47297	2.43029	2.45303	1.47306	2.43038	2.45312	1.47315	2.43047	2.45321	1.47324	2.43056	2.4533	1.47333	2.43065	2.45339	1.47342	2.43074	2.45348	1.47351	2.43083	2.45357	1.4736	2.43092	2.45366	1.47369	2.43101	2.45375
ENSG00000123473	STIL	-0.23896	-0.0796812	1.32337	1.65661	0.726113	1.9404	0.866316	0.534303	1.09474	1.6735	0.776629	-0.0169591	1.31027	0.802685	0.125823	1.21523	0.802775	0.125913	1.21532	0.802865	0.126003	1.21541	0.802955	0.126093	1.2155	0.803045	0.126183	1.21559	0.803135	0.126273	1.21568	0.803225	0.126363	1.21577	0.803315	0.126453	1.21586	0.803405	0.126543	1.21595	0.803495	0.126633	1.21604	0.803585	0.126723	1.21613	0.803675	0.126813
ENSG00000237424	FOXD2-AS1	-0.536911	2.17581	0.574361	1.07855	0.864269	0.861635	0.402079	0.267174	-1.64362	0.250009	-1.19747	0.627382	0.513726	-0.653551	1.21923	1.00516	-0.653461	1.21932	1.00525	-0.653371	1.21941	1.00534	-0.653281	1.2195	1.00543	-0.653191	1.21959	1.00552	-0.653101	1.21968	1.00561	-0.653011	1.21977	1.0057	-0.652921	1.21986	1.00579	-0.652831	1.21995	1.00588	-0.652741	1.22004	1.00597	-0.652651	1.22013	1.00606	-0.652561	1.22022
ENSG00000132122	SPATA6	-0.797831	-3.14569	-0.717335	-1.93859	1.49465	-0.708786	0.493489	2.22508	-0.55521	0.277909	-0.134557	0.0466995	0.860744	-1.69724	0.399018	-0.00392171	-1.69715	0.399108	-0.00383171	-1.69706	0.399198	-0.00374171	-1.69697	0.399288	-0.00365171	-1.69688	0.399378	-0.00356171	-1.69679	0.399468	-0.00347171	-1.6967	0.399558	-0.00338171	-1.69661	0.399648	-0.00329171	-1.69652	0.399738	-0.00320171	-1.69643	0.399828	-0.00311171	-1.69634	0.399918	-0.00302171	-1.69625	0.400008
ENSG00000162373	BEND5	0.195245	0.267773	1.38415	0.233107	0.310525	0.467338	0.423126	-2.08531	-0.174314	-0.588792	0.184461	0.354936	-1.03465	-2.04714	-0.189837	0.164528	-2.04705	-0.189747	0.164618	-2.04696	-0.189657	0.164708	-2.04687	-0.189567	0.164798	-2.04678	-0.189477	0.164888	-2.04669	-0.189387	0.164978	-2.0466	-0.189297	0.165068	-2.04651	-0.189207	0.165158	-2.04642	-0.189117	0.165248	-2.04633	-0.189027	0.165338	-2.04624	-0.188937	0.165428	-2.04615	-0.188847
ENSG00000123080	CDKN2C	-0.0913353	0.982353	1.42018	0.507658	0.327486	1.92695	1.0359	1.09213	0.962843	1.69941	1.08978	-0.702525	1.06389	1.21437	0.441724	0.885624	1.21446	0.441814	0.885714	1.21455	0.441904	0.885804	1.21464	0.441994	0.885894	1.21473	0.442084	0.885984	1.21482	0.442174	0.886074	1.21491	0.442264	0.886164	1.215	0.442354	0.886254	1.21509	0.442444	0.886344	1.21518	0.442534	0.886434	1.21527	0.442624	0.886524	1.21536	0.442714
ENSG00000123091	RNF11	-0.966475	-0.0294894	-0.467052	0.601949	0.583454	0.0456725	0.0485125	-0.0146199	-1.42568	1.68313	0.706313	1.22638	0.971362	2.46941	1.60006	1.97437	2.4695	1.60015	1.97446	2.46959	1.60024	1.97455	2.46968	1.60033	1.97464	2.46977	1.60042	1.97473	2.46986	1.60051	1.97482	2.46995	1.6006	1.97491	2.47004	1.60069	1.975	2.47013	1.60078	1.97509	2.47022	1.60087	1.97518	2.47031	1.60096	1.97527	2.4704	1.60105
ENSG00000078618	NRDC	-0.166584	-0.305788	0.0395078	-1.023	0.114395	1.47948	0.162163	1.84975	2.35914	0.993519	0.0820611	0.592786	0.824818	1.52351	1.79879	0.517807	1.5236	1.79888	0.517897	1.52369	1.79897	0.517987	1.52378	1.79906	0.518077	1.52387	1.79915	0.518167	1.52396	1.79924	0.518257	1.52405	1.79933	0.518347	1.52414	1.79942	0.518437	1.52423	1.79951	0.518527	1.52432	1.7996	0.518617	1.52441	1.79969	0.518707	1.5245	1.79978
ENSG00000198841	KTI12	1.34564	2.18344	1.43504	-0.269897	0.563032	1.3462	0.886932	-0.606136	0.899014	-0.0509653	0.659657	0.73277	0.216641	0.13054	-2.88774	-0.444486	0.13063	-2.88765	-0.444396	0.13072	-2.88756	-0.444306	0.13081	-2.88747	-0.444216	0.1309	-2.88738	-0.444126	0.13099	-2.88729	-0.444036	0.13108	-2.8872	-0.443946	0.13117	-2.88711	-0.443856	0.13126	-2.88702	-0.443766	0.13135	-2.88693	-0.443676	0.13144	-2.88684	-0.443586	0.13153	-2.88675
ENSG00000134717	BTF3L4	0.439935	-0.124031	-0.823561	-1.77989	-1.13017	0.112133	-0.902049	2.24044	-0.320952	1.07782	0.357653	-1.3206	0.255965	0.0392192	-1.95868	-0.111463	0.0393092	-1.95859	-0.111373	0.0393992	-1.9585	-0.111283	0.0394892	-1.95841	-0.111193	0.0395792	-1.95832	-0.111103	0.0396692	-1.95823	-0.111013	0.0397592	-1.95814	-0.110923	0.0398492	-1.95805	-0.110833	0.0399392	-1.95796	-0.110743	0.0400292	-1.95787	-0.110653	0.0401192	-1.95778	-0.110563	0.0402092	-1.95769
ENSG00000157077	ZFYVE9	0.110877	-1.90998	0.411098	1.09817	-1.4005	-0.61069	0.244918	-1.35959	0.622608	0.677542	1.1751	0.103084	-0.552125	-0.0114936	0.602762	-0.866086	-0.0114036	0.602852	-0.865996	-0.0113136	0.602942	-0.865906	-0.0112236	0.603032	-0.865816	-0.0111336	0.603122	-0.865726	-0.0110436	0.603212	-0.865636	-0.0109536	0.603302	-0.865546	-0.0108636	0.603392	-0.865456	-0.0107736	0.603482	-0.865366	-0.0106836	0.603572	-0.865276	-0.0105936	0.603662	-0.865186	-0.0105036	0.603752
ENSG00000085840	ORC1	0.0783778	0.394908	1.13388	1.42091	0.409204	1.68071	0.769601	0.923035	0.785979	1.49187	1.00904	0.119095	1.41093	1.0927	-0.115284	1.09802	1.09279	-0.115194	1.09811	1.09288	-0.115104	1.0982	1.09297	-0.115014	1.09829	1.09306	-0.114924	1.09838	1.09315	-0.114834	1.09847	1.09324	-0.114744	1.09856	1.09333	-0.114654	1.09865	1.09342	-0.114564	1.09874	1.09351	-0.114474	1.09883	1.0936	-0.114384	1.09892	1.09369	-0.114294
ENSG00000134748	PRPF38A	-0.13447	-0.201158	-0.782904	0.867832	-1.03775	-0.923636	-0.507641	-0.59926	-0.123738	0.484878	1.1986	-2.14143	-0.803725	-0.68427	-2.52326	0.560377	-0.68418	-2.52317	0.560467	-0.68409	-2.52308	0.560557	-0.684	-2.52299	0.560647	-0.68391	-2.5229	0.560737	-0.68382	-2.52281	0.560827	-0.68373	-2.52272	0.560917	-0.68364	-2.52263	0.561007	-0.68355	-2.52254	0.561097	-0.68346	-2.52245	0.561187	-0.68337	-2.52236	0.561277	-0.68328	-2.52227
ENSG00000134744	TUT4	0.573263	0.405889	-0.00695916	1.111	-0.429527	-0.649527	-0.162463	-1.85984	-0.963152	-0.294649	0.781712	0.182137	-1.72447	-2.56117	-0.923576	-0.00298963	-2.56108	-0.923486	-0.00289963	-2.56099	-0.923396	-0.00280963	-2.5609	-0.923306	-0.00271963	-2.56081	-0.923216	-0.00262963	-2.56072	-0.923126	-0.00253963	-2.56063	-0.923036	-0.00244963	-2.56054	-0.922946	-0.00235963	-2.56045	-0.922856	-0.00226963	-2.56036	-0.922766	-0.00217963	-2.56027	-0.922676	-0.00208963	-2.56018	-0.922586
ENSG00000116157	GPX7	1.27873	-0.369031	1.6728	0.849508	-2.24304	1.89397	0.62759	-0.479514	0.617631	0.831717	0.534652	-1.41748	0.450848	1.14385	0.0475499	1.64636	1.14394	0.0476399	1.64645	1.14403	0.0477299	1.64654	1.14412	0.0478199	1.64663	1.14421	0.0479099	1.64672	1.1443	0.0479999	1.64681	1.14439	0.0480899	1.6469	1.14448	0.0481799	1.64699	1.14457	0.0482699	1.64708	1.14466	0.0483599	1.64717	1.14475	0.0484499	1.64726	1.14484	0.0485399
ENSG00000182183	SHISAL2A	1.24861	0.691233	0.264329	0.941688	-1.00376	-0.853281	-0.120357	-2.67249	-1.25891	-1.18521	0.587871	0.627506	0.10904	-1.4133	-0.701622	-0.248941	-1.41321	-0.701532	-0.248851	-1.41312	-0.701442	-0.248761	-1.41303	-0.701352	-0.248671	-1.41294	-0.701262	-0.248581	-1.41285	-0.701172	-0.248491	-1.41276	-0.701082	-0.248401	-1.41267	-0.700992	-0.248311	-1.41258	-0.700902	-0.248221	-1.41249	-0.700812	-0.248131	-1.4124	-0.700722	-0.248041	-1.41231	-0.700632
ENSG00000162377	COA7	-0.578412	0.0845949	0.251641	-2.76999	-0.595242	-0.0911517	-0.7529	0.978961	1.49333	0.869416	0.979608	-0.0497066	0.95032	-0.786684	-0.800231	-0.222306	-0.786594	-0.800141	-0.222216	-0.786504	-0.800051	-0.222126	-0.786414	-0.799961	-0.222036	-0.786324	-0.799871	-0.221946	-0.786234	-0.799781	-0.221856	-0.786144	-0.799691	-0.221766	-0.786054	-0.799601	-0.221676	-0.785964	-0.799511	-0.221586	-0.785874	-0.799421	-0.221496	-0.785784	-0.799331	-0.221406	-0.785694	-0.799241
ENSG00000162378	ZYG11B	-1.94857	-2.51095	-0.519504	-0.680256	-0.861818	0.333124	0.469303	1.7935	0.45739	0.12953	-0.0982682	-0.932187	-0.750485	-0.716788	-0.208646	-0.811359	-0.716698	-0.208556	-0.811269	-0.716608	-0.208466	-0.811179	-0.716518	-0.208376	-0.811089	-0.716428	-0.208286	-0.810999	-0.716338	-0.208196	-0.810909	-0.716248	-0.208106	-0.810819	-0.716158	-0.208016	-0.810729	-0.716068	-0.207926	-0.810639	-0.715978	-0.207836	-0.810549	-0.715888	-0.207746	-0.810459	-0.715798	-0.207656
ENSG00000121310	ECHDC2	1.5762	2.18185	0.683487	0.609701	-0.779932	0.741378	0.351698	-1.78875	0.0736374	-0.0628055	1.59009	1.34582	-1.42267	-1.21911	-2.10401	0.377574	-1.21902	-2.10392	0.377664	-1.21893	-2.10383	0.377754	-1.21884	-2.10374	0.377844	-1.21875	-2.10365	0.377934	-1.21866	-2.10356	0.378024	-1.21857	-2.10347	0.378114	-1.21848	-2.10338	0.378204	-1.21839	-2.10329	0.378294	-1.2183	-2.1032	0.378384	-1.21821	-2.10311	0.378474	-1.21812	-2.10302
ENSG00000116171	SCP2	0.813221	-0.228332	0.0217818	-0.93478	0.668495	1.87839	1.03292	0.953854	0.968365	1.07223	0.896369	-0.883855	0.274334	0.266464	-1.91002	0.0406267	0.266554	-1.90993	0.0407167	0.266644	-1.90984	0.0408067	0.266734	-1.90975	0.0408967	0.266824	-1.90966	0.0409867	0.266914	-1.90957	0.0410767	0.267004	-1.90948	0.0411667	0.267094	-1.90939	0.0412567	0.267184	-1.9093	0.0413467	0.267274	-1.90921	0.0414367	0.267364	-1.90912	0.0415267	0.267454	-1.90903
ENSG00000174348	PODN	0.766586	0.96956	0.437448	-0.860821	-0.0460137	0.355763	1.67577	1.29778	-0.512087	-2.43645	0.196929	-1.54989	0.60242	-2.22805	-1.26109	-1.33796	-2.22796	-1.261	-1.33787	-2.22787	-1.26091	-1.33778	-2.22778	-1.26082	-1.33769	-2.22769	-1.26073	-1.3376	-2.2276	-1.26064	-1.33751	-2.22751	-1.26055	-1.33742	-2.22742	-1.26046	-1.33733	-2.22733	-1.26037	-1.33724	-2.22724	-1.26028	-1.33715	-2.22715	-1.26019	-1.33706	-2.22706	-1.2601
ENSG00000162383	SLC1A7	-0.362277	0.318306	0.121502	-0.867229	-0.3135	0.532799	1.27939	0.369246	-0.536213	-2.54933	0.696854	-0.309131	0.858922	-1.58521	-1.23836	-0.60725	-1.58512	-1.23827	-0.60716	-1.58503	-1.23818	-0.60707	-1.58494	-1.23809	-0.60698	-1.58485	-1.238	-0.60689	-1.58476	-1.23791	-0.6068	-1.58467	-1.23782	-0.60671	-1.58458	-1.23773	-0.60662	-1.58449	-1.23764	-0.60653	-1.5844	-1.23755	-0.60644	-1.58431	-1.23746	-0.60635	-1.58422	-1.23737
ENSG00000157184	CPT2	-0.806952	-0.0798658	-0.076575	-1.85272	-1.1949	-0.238544	-0.093167	1.42266	1.08952	-0.0805096	0.346595	-1.02182	0.641772	0.39718	0.204772	0.127793	0.39727	0.204862	0.127883	0.39736	0.204952	0.127973	0.39745	0.205042	0.128063	0.39754	0.205132	0.128153	0.39763	0.205222	0.128243	0.39772	0.205312	0.128333	0.39781	0.205402	0.128423	0.3979	0.205492	0.128513	0.39799	0.205582	0.128603	0.39808	0.205672	0.128693	0.39817	0.205762
ENSG00000162385	MAGOH	2.15125	0.347261	0.519047	-1.10779	0.190505	1.20478	1.32215	-0.042496	1.03031	1.04384	0.370445	-0.185269	1.55017	0.222477	-1.00388	0.737019	0.222567	-1.00379	0.737109	0.222657	-1.0037	0.737199	0.222747	-1.00361	0.737289	0.222837	-1.00352	0.737379	0.222927	-1.00343	0.737469	0.223017	-1.00334	0.737559	0.223107	-1.00325	0.737649	0.223197	-1.00316	0.737739	0.223287	-1.00307	0.737829	0.223377	-1.00298	0.737919	0.223467	-1.00289
ENSG00000157193	LRP8	-1.0788	-0.368751	0.434273	1.14401	-0.0485848	1.50861	0.516367	1.64552	1.55835	1.64562	0.248161	0.353424	1.27442	2.21211	0.607135	0.68153	2.2122	0.607225	0.68162	2.21229	0.607315	0.68171	2.21238	0.607405	0.6818	2.21247	0.607495	0.68189	2.21256	0.607585	0.68198	2.21265	0.607675	0.68207	2.21274	0.607765	0.68216	2.21283	0.607855	0.68225	2.21292	0.607945	0.68234	2.21301	0.608035	0.68243	2.2131	0.608125
ENSG00000230138	NA	0.502762	-0.948983	-0.432778	-3.15473	0.221634	-0.635558	0.286114	0.742457	1.90789	1.10683	1.22367	-0.491056	1.40224	-0.467072	1.32963	0.721783	-0.466982	1.32972	0.721873	-0.466892	1.32981	0.721963	-0.466802	1.3299	0.722053	-0.466712	1.32999	0.722143	-0.466622	1.33008	0.722233	-0.466532	1.33017	0.722323	-0.466442	1.33026	0.722413	-0.466352	1.33035	0.722503	-0.466262	1.33044	0.722593	-0.466172	1.33053	0.722683	-0.466082	1.33062
ENSG00000058804	NDC1	-1.35246	-0.910391	0.909748	-0.878372	-0.799673	1.75319	0.0878447	0.011393	-0.453145	1.60669	0.734394	-1.98673	1.06652	-0.110316	-2.66809	0.0732449	-0.110226	-2.668	0.0733349	-0.110136	-2.66791	0.0734249	-0.110046	-2.66782	0.0735149	-0.109956	-2.66773	0.0736049	-0.109866	-2.66764	0.0736949	-0.109776	-2.66755	0.0737849	-0.109686	-2.66746	0.0738749	-0.109596	-2.66737	0.0739649	-0.109506	-2.66728	0.0740549	-0.109416	-2.66719	0.0741449	-0.109326	-2.6671
ENSG00000058799	YIPF1	1.42507	0.761839	1.11559	-0.997004	-0.479901	1.24416	0.715926	1.70167	1.89205	0.794667	0.43977	-1.24342	0.771219	1.52803	0.0173282	-0.149148	1.52812	0.0174182	-0.149058	1.52821	0.0175082	-0.148968	1.5283	0.0175982	-0.148878	1.52839	0.0176882	-0.148788	1.52848	0.0177782	-0.148698	1.52857	0.0178682	-0.148608	1.52866	0.0179582	-0.148518	1.52875	0.0180482	-0.148428	1.52884	0.0181382	-0.148338	1.52893	0.0182282	-0.148248	1.52902	0.0183182
ENSG00000081870	HSPB11	1.96671	-0.205151	1.29309	-0.506603	-0.19175	1.50642	1.27893	-0.422421	-0.549123	1.14152	1.62673	-1.08869	0.0461409	-1.47566	-1.08866	1.0617	-1.47557	-1.08857	1.06179	-1.47548	-1.08848	1.06188	-1.47539	-1.08839	1.06197	-1.4753	-1.0883	1.06206	-1.47521	-1.08821	1.06215	-1.47512	-1.08812	1.06224	-1.47503	-1.08803	1.06233	-1.47494	-1.08794	1.06242	-1.47485	-1.08785	1.06251	-1.47476	-1.08776	1.0626	-1.47467	-1.08767
ENSG00000116212	LRRC42	1.79903	1.35538	-0.134515	-0.925051	-0.322339	1.80166	0.978371	0.435246	0.807633	0.936243	1.48103	-1.42886	0.473817	0.632016	-0.284961	0.161156	0.632106	-0.284871	0.161246	0.632196	-0.284781	0.161336	0.632286	-0.284691	0.161426	0.632376	-0.284601	0.161516	0.632466	-0.284511	0.161606	0.632556	-0.284421	0.161696	0.632646	-0.284331	0.161786	0.632736	-0.284241	0.161876	0.632826	-0.284151	0.161966	0.632916	-0.284061	0.162056	0.633006	-0.283971
ENSG00000116205	TCEANC2	-0.466994	-0.458475	0.153693	-1.20837	-0.194741	-0.721383	-0.22731	-0.0874526	-0.730247	-0.0212514	0.510882	-1.29644	-1.7841	-2.55342	-1.34684	-0.498028	-2.55333	-1.34675	-0.497938	-2.55324	-1.34666	-0.497848	-2.55315	-1.34657	-0.497758	-2.55306	-1.34648	-0.497668	-2.55297	-1.34639	-0.497578	-2.55288	-1.3463	-0.497488	-2.55279	-1.34621	-0.497398	-2.5527	-1.34612	-0.497308	-2.55261	-1.34603	-0.497218	-2.55252	-1.34594	-0.497128	-2.55243	-1.34585
ENSG00000215883	CYB5RL	-0.482956	0.3507	0.115731	-1.8882	-1.19915	-2.67236	-0.0299133	0.113204	-0.11444	0.508022	-0.156564	-0.718859	0.264994	-2.13293	-0.681826	-0.52855	-2.13284	-0.681736	-0.52846	-2.13275	-0.681646	-0.52837	-2.13266	-0.681556	-0.52828	-2.13257	-0.681466	-0.52819	-2.13248	-0.681376	-0.5281	-2.13239	-0.681286	-0.52801	-2.1323	-0.681196	-0.52792	-2.13221	-0.681106	-0.52783	-2.13212	-0.681016	-0.52774	-2.13203	-0.680926	-0.52765	-2.13194	-0.680836
ENSG00000116221	MRPL37	0.439839	0.822172	0.506411	0.969178	0.972046	1.86525	0.98318	0.384409	0.637203	0.698766	0.629203	0.0981905	2.11031	2.08689	-0.938313	0.69894	2.08698	-0.938223	0.69903	2.08707	-0.938133	0.69912	2.08716	-0.938043	0.69921	2.08725	-0.937953	0.6993	2.08734	-0.937863	0.69939	2.08743	-0.937773	0.69948	2.08752	-0.937683	0.69957	2.08761	-0.937593	0.69966	2.0877	-0.937503	0.69975	2.08779	-0.937413	0.69984	2.08788	-0.937323
ENSG00000157216	SSBP3	0.0432316	2.7226	0.268015	1.09035	1.42917	1.91626	-0.431229	-1.67784	-1.70014	-0.092425	0.226275	0.422157	1.19554	-1.11838	-0.82317	0.278043	-1.11829	-0.82308	0.278133	-1.1182	-0.82299	0.278223	-1.11811	-0.8229	0.278313	-1.11802	-0.82281	0.278403	-1.11793	-0.82272	0.278493	-1.11784	-0.82263	0.278583	-1.11775	-0.82254	0.278673	-1.11766	-0.82245	0.278763	-1.11757	-0.82236	0.278853	-1.11748	-0.82227	0.278943	-1.11739	-0.82218
ENSG00000198711	SSBP3-AS1	1.93889	0.767316	-1.32253	1.32373	1.33993	-1.75815	0.452299	-0.443238	-0.89897	-1.64288	1.2077	-0.402101	-0.97388	-0.484424	1.4432	-0.396848	-0.484334	1.44329	-0.396758	-0.484244	1.44338	-0.396668	-0.484154	1.44347	-0.396578	-0.484064	1.44356	-0.396488	-0.483974	1.44365	-0.396398	-0.483884	1.44374	-0.396308	-0.483794	1.44383	-0.396218	-0.483704	1.44392	-0.396128	-0.483614	1.44401	-0.396038	-0.483524	1.4441	-0.395948	-0.483434	1.44419
ENSG00000162390	ACOT11	-1.42346	-1.88741	0.0592159	0.269151	-1.74894	-0.591033	-0.393583	-0.44032	-0.0149196	0.587764	-0.614347	-0.865298	1.53034	1.40864	1.35279	-1.0682	1.40873	1.35288	-1.06811	1.40882	1.35297	-1.06802	1.40891	1.35306	-1.06793	1.409	1.35315	-1.06784	1.40909	1.35324	-1.06775	1.40918	1.35333	-1.06766	1.40927	1.35342	-1.06757	1.40936	1.35351	-1.06748	1.40945	1.3536	-1.06739	1.40954	1.35369	-1.0673	1.40963	1.35378
ENSG00000162396	PARS2	-0.790762	0.564232	-0.427507	-0.537588	-1.04517	-0.775098	-0.160237	-0.326963	-1.251	-0.185132	0.653001	-1.66548	-1.36405	-0.741609	0.0320093	-0.291375	-0.741519	0.0320993	-0.291285	-0.741429	0.0321893	-0.291195	-0.741339	0.0322793	-0.291105	-0.741249	0.0323693	-0.291015	-0.741159	0.0324593	-0.290925	-0.741069	0.0325493	-0.290835	-0.740979	0.0326393	-0.290745	-0.740889	0.0327293	-0.290655	-0.740799	0.0328193	-0.290565	-0.740709	0.0329093	-0.290475	-0.740619	0.0329993
ENSG00000006555	TTC22	-0.0517088	0.81099	-0.261548	-0.361054	-0.0460986	0.166412	-0.55925	-0.961388	-1.89725	-0.940298	0.843369	0.00651241	-0.0112114	-2.77954	-2.55176	-0.21149	-2.77945	-2.55167	-0.2114	-2.77936	-2.55158	-0.21131	-2.77927	-2.55149	-0.21122	-2.77918	-2.5514	-0.21113	-2.77909	-2.55131	-0.21104	-2.779	-2.55122	-0.21095	-2.77891	-2.55113	-0.21086	-2.77882	-2.55104	-0.21077	-2.77873	-2.55095	-0.21068	-2.77864	-2.55086	-0.21059	-2.77855	-2.55077
ENSG00000162398	LEXM	0.638101	1.06705	-0.51788	-1.25865	-1.12867	0.542216	0.473084	0.77844	-0.373263	-0.194137	0.737812	-0.708381	-0.206624	-2.10467	-1.47171	-0.833193	-2.10458	-1.47162	-0.833103	-2.10449	-1.47153	-0.833013	-2.1044	-1.47144	-0.832923	-2.10431	-1.47135	-0.832833	-2.10422	-1.47126	-0.832743	-2.10413	-1.47117	-0.832653	-2.10404	-1.47108	-0.832563	-2.10395	-1.47099	-0.832473	-2.10386	-1.4709	-0.832383	-2.10377	-1.47081	-0.832293	-2.10368	-1.47072
ENSG00000116133	DHCR24	-1.82469	0.702646	-0.0469972	0.375015	0.40698	0.918653	0.194619	1.23466	2.28602	1.8049	0.101545	0.0570629	0.840236	1.57942	0.495075	1.27037	1.57951	0.495165	1.27046	1.5796	0.495255	1.27055	1.57969	0.495345	1.27064	1.57978	0.495435	1.27073	1.57987	0.495525	1.27082	1.57996	0.495615	1.27091	1.58005	0.495705	1.271	1.58014	0.495795	1.27109	1.58023	0.495885	1.27118	1.58032	0.495975	1.27127	1.58041	0.496065
ENSG00000162402	USP24	-1.45223	-0.53939	0.0115908	0.47608	-0.535319	-0.59566	0.119322	-0.448782	-0.307255	-0.484655	-0.661336	0.89484	-1.2617	-2.88359	-0.602382	-0.364321	-2.8835	-0.602292	-0.364231	-2.88341	-0.602202	-0.364141	-2.88332	-0.602112	-0.364051	-2.88323	-0.602022	-0.363961	-2.88314	-0.601932	-0.363871	-2.88305	-0.601842	-0.363781	-2.88296	-0.601752	-0.363691	-2.88287	-0.601662	-0.363601	-2.88278	-0.601572	-0.363511	-2.88269	-0.601482	-0.363421	-2.8826	-0.601392
ENSG00000162600	OMA1	1.45478	0.970743	-0.187711	-2.28389	-0.945854	-0.492688	-1.24217	0.714598	0.865011	0.267868	1.5236	-1.91753	-0.64163	-2.22797	-0.444323	0.52224	-2.22788	-0.444233	0.52233	-2.22779	-0.444143	0.52242	-2.2277	-0.444053	0.52251	-2.22761	-0.443963	0.5226	-2.22752	-0.443873	0.52269	-2.22743	-0.443783	0.52278	-2.22734	-0.443693	0.52287	-2.22725	-0.443603	0.52296	-2.22716	-0.443513	0.52305	-2.22707	-0.443423	0.52314	-2.22698	-0.443333
ENSG00000184292	TACSTD2	0.0795764	-0.660312	-0.707581	-0.755868	-0.672699	-0.729666	-2.01069	-0.644288	-0.948869	1.32155	-0.485383	-0.295224	0.561541	1.44915	-0.553331	1.10295	1.44924	-0.553241	1.10304	1.44933	-0.553151	1.10313	1.44942	-0.553061	1.10322	1.44951	-0.552971	1.10331	1.4496	-0.552881	1.1034	1.44969	-0.552791	1.10349	1.44978	-0.552701	1.10358	1.44987	-0.552611	1.10367	1.44996	-0.552521	1.10376	1.45005	-0.552431	1.10385	1.45014	-0.552341
ENSG00000162601	MYSM1	-0.0785333	-1.66391	0.522611	-0.0990408	-1.00949	-0.267227	-0.00117265	-0.623396	-0.345745	0.217275	1.2656	0.176378	-1.22909	-2.6898	-2.27551	-0.331473	-2.68971	-2.27542	-0.331383	-2.68962	-2.27533	-0.331293	-2.68953	-2.27524	-0.331203	-2.68944	-2.27515	-0.331113	-2.68935	-2.27506	-0.331023	-2.68926	-2.27497	-0.330933	-2.68917	-2.27488	-0.330843	-2.68908	-2.27479	-0.330753	-2.68899	-2.2747	-0.330663	-2.6889	-2.27461	-0.330573	-2.68881	-2.27452
ENSG00000177606	JUN	0.258326	0.0689863	0.805498	0.431508	0.733837	-0.0106194	0.1586	0.0419473	0.628522	-0.954419	-1.16462	-1.0489	-0.850222	-1.20482	-1.53361	-1.02254	-1.20473	-1.53352	-1.02245	-1.20464	-1.53343	-1.02236	-1.20455	-1.53334	-1.02227	-1.20446	-1.53325	-1.02218	-1.20437	-1.53316	-1.02209	-1.20428	-1.53307	-1.022	-1.20419	-1.53298	-1.02191	-1.2041	-1.53289	-1.02182	-1.20401	-1.5328	-1.02173	-1.20392	-1.53271	-1.02164	-1.20383	-1.53262
ENSG00000234807	NA	0.608218	0.629937	0.639622	-1.93058	0.511783	-0.010518	-0.836318	-0.23043	0.670328	-1.88683	-1.42918	1.58729	-1.17863	-0.583507	-0.531989	-0.80293	-0.583417	-0.531899	-0.80284	-0.583327	-0.531809	-0.80275	-0.583237	-0.531719	-0.80266	-0.583147	-0.531629	-0.80257	-0.583057	-0.531539	-0.80248	-0.582967	-0.531449	-0.80239	-0.582877	-0.531359	-0.8023	-0.582787	-0.531269	-0.80221	-0.582697	-0.531179	-0.80212	-0.582607	-0.531089	-0.80203	-0.582517	-0.530999
ENSG00000172456	FGGY	1.03629	0.91186	1.63898	-0.757238	1.74251	0.35673	1.82161	-1.01573	0.991839	0.134478	-0.280691	1.58036	0.146987	-0.20843	-1.152	0.319574	-0.20834	-1.15191	0.319664	-0.20825	-1.15182	0.319754	-0.20816	-1.15173	0.319844	-0.20807	-1.15164	0.319934	-0.20798	-1.15155	0.320024	-0.20789	-1.15146	0.320114	-0.2078	-1.15137	0.320204	-0.20771	-1.15128	0.320294	-0.20762	-1.15119	0.320384	-0.20753	-1.1511	0.320474	-0.20744	-1.15101
ENSG00000134709	HOOK1	-0.0481288	-1.36794	0.416009	0.805732	-1.18266	0.393088	-0.0928117	-1.98418	-1.63493	-1.43217	1.07105	0.573132	-0.70972	-1.17014	-1.85286	-0.747135	-1.17005	-1.85277	-0.747045	-1.16996	-1.85268	-0.746955	-1.16987	-1.85259	-0.746865	-1.16978	-1.8525	-0.746775	-1.16969	-1.85241	-0.746685	-1.1696	-1.85232	-0.746595	-1.16951	-1.85223	-0.746505	-1.16942	-1.85214	-0.746415	-1.16933	-1.85205	-0.746325	-1.16924	-1.85196	-0.746235	-1.16915	-1.85187
ENSG00000162599	NFIA	-0.620508	-1.80217	-0.513436	-0.186242	-0.0621075	-1.6024	-0.557488	3.89044	0.118296	0.820279	0.108592	0.900215	1.08524	-0.381865	-0.625868	0.0152768	-0.381775	-0.625778	0.0153668	-0.381685	-0.625688	0.0154568	-0.381595	-0.625598	0.0155468	-0.381505	-0.625508	0.0156368	-0.381415	-0.625418	0.0157268	-0.381325	-0.625328	0.0158168	-0.381235	-0.625238	0.0159068	-0.381145	-0.625148	0.0159968	-0.381055	-0.625058	0.0160868	-0.380965	-0.624968	0.0161768	-0.380875	-0.624878
ENSG00000132849	PATJ	-0.0948138	-0.136788	0.777821	0.942784	-0.672641	0.0508561	0.0796067	-2.94906	-1.50353	-1.10995	0.897341	0.852897	-0.764617	-0.336735	-2.61719	-0.188561	-0.336645	-2.6171	-0.188471	-0.336555	-2.61701	-0.188381	-0.336465	-2.61692	-0.188291	-0.336375	-2.61683	-0.188201	-0.336285	-2.61674	-0.188111	-0.336195	-2.61665	-0.188021	-0.336105	-2.61656	-0.187931	-0.336015	-2.61647	-0.187841	-0.335925	-2.61638	-0.187751	-0.335835	-2.61629	-0.187661	-0.335745	-2.6162
ENSG00000240563	L1TD1	0.511846	0.116563	-0.098404	-0.255487	1.17101	0.230117	1.4351	-0.72442	0.0703141	1.60169	0.876907	0.95984	0.0901662	0.948965	-0.274491	1.43335	0.949055	-0.274401	1.43344	0.949145	-0.274311	1.43353	0.949235	-0.274221	1.43362	0.949325	-0.274131	1.43371	0.949415	-0.274041	1.4338	0.949505	-0.273951	1.43389	0.949595	-0.273861	1.43398	0.949685	-0.273771	1.43407	0.949775	-0.273681	1.43416	0.949865	-0.273591	1.43425	0.949955	-0.273501
ENSG00000162607	USP1	1.09765	0.603219	0.923744	0.230728	-0.418949	1.7599	0.370655	-0.232071	-0.475483	1.55223	1.12184	-1.87663	-0.14433	-1.27188	-3.33754	0.767047	-1.27179	-3.33745	0.767137	-1.2717	-3.33736	0.767227	-1.27161	-3.33727	0.767317	-1.27152	-3.33718	0.767407	-1.27143	-3.33709	0.767497	-1.27134	-3.337	0.767587	-1.27125	-3.33691	0.767677	-1.27116	-3.33682	0.767767	-1.27107	-3.33673	0.767857	-1.27098	-3.33664	0.767947	-1.27089	-3.33655
ENSG00000116641	DOCK7	-1.00597	-2.3342	-0.196572	-1.66834	-0.89098	-0.641946	-0.23765	1.15249	0.870797	-0.0610852	-1.64803	-0.0149543	0.219233	0.20849	0.154312	-0.628028	0.20858	0.154402	-0.627938	0.20867	0.154492	-0.627848	0.20876	0.154582	-0.627758	0.20885	0.154672	-0.627668	0.20894	0.154762	-0.627578	0.20903	0.154852	-0.627488	0.20912	0.154942	-0.627398	0.20921	0.155032	-0.627308	0.2093	0.155122	-0.627218	0.20939	0.155212	-0.627128	0.20948	0.155302
ENSG00000125703	ATG4C	-0.17314	-1.96613	0.0822876	-2.28548	-0.995935	-0.93183	-0.333708	1.16332	0.836682	0.117973	0.572541	-1.11515	-0.925326	-0.522323	0.0222779	-0.452303	-0.522233	0.0223679	-0.452213	-0.522143	0.0224579	-0.452123	-0.522053	0.0225479	-0.452033	-0.521963	0.0226379	-0.451943	-0.521873	0.0227279	-0.451853	-0.521783	0.0228179	-0.451763	-0.521693	0.0229079	-0.451673	-0.521603	0.0229979	-0.451583	-0.521513	0.0230879	-0.451493	-0.521423	0.0231779	-0.451403	-0.521333	0.0232679
ENSG00000088035	ALG6	0.774812	-0.853145	0.199223	-1.59481	-1.20555	0.0437597	-0.515766	0.829418	0.283661	1.14889	1.86359	-1.43015	0.647044	-0.388259	-2.08629	1.01243	-0.388169	-2.0862	1.01252	-0.388079	-2.08611	1.01261	-0.387989	-2.08602	1.0127	-0.387899	-2.08593	1.01279	-0.387809	-2.08584	1.01288	-0.387719	-2.08575	1.01297	-0.387629	-2.08566	1.01306	-0.387539	-2.08557	1.01315	-0.387449	-2.08548	1.01324	-0.387359	-2.08539	1.01333	-0.387269	-2.0853
ENSG00000142856	ITGB3BP	1.97263	0.358801	1.41922	-0.241116	0.607685	1.18827	-0.0695684	-0.0311832	-2.57654	1.39233	0.661916	-0.127097	0.284676	-0.338568	-1.99223	1.22955	-0.338478	-1.99214	1.22964	-0.338388	-1.99205	1.22973	-0.338298	-1.99196	1.22982	-0.338208	-1.99187	1.22991	-0.338118	-1.99178	1.23	-0.338028	-1.99169	1.23009	-0.337938	-1.9916	1.23018	-0.337848	-1.99151	1.23027	-0.337758	-1.99142	1.23036	-0.337668	-1.99133	1.23045	-0.337578	-1.99124
ENSG00000203965	EFCAB7	0.53121	0.402342	1.48462	-0.0713523	-1.44244	-0.117101	-0.587347	-1.15342	-0.585892	0.797607	0.23266	-2.46424	-1.22078	-2.4287	-1.73868	0.766219	-2.42861	-1.73859	0.766309	-2.42852	-1.7385	0.766399	-2.42843	-1.73841	0.766489	-2.42834	-1.73832	0.766579	-2.42825	-1.73823	0.766669	-2.42816	-1.73814	0.766759	-2.42807	-1.73805	0.766849	-2.42798	-1.73796	0.766939	-2.42789	-1.73787	0.767029	-2.4278	-1.73778	0.767119	-2.42771	-1.73769
ENSG00000079739	PGM1	-0.114554	0.885446	-0.916551	-0.399503	1.50191	0.597249	1.79599	-1.35443	0.941632	-0.0139642	0.687223	-1.6344	1.64023	-0.862995	-1.65091	0.00937426	-0.862905	-1.65082	0.00946426	-0.862815	-1.65073	0.00955426	-0.862725	-1.65064	0.00964426	-0.862635	-1.65055	0.00973426	-0.862545	-1.65046	0.00982426	-0.862455	-1.65037	0.00991426	-0.862365	-1.65028	0.0100043	-0.862275	-1.65019	0.0100943	-0.862185	-1.6501	0.0101843	-0.862095	-1.65001	0.0102743	-0.862005	-1.64992
ENSG00000185483	ROR1	-0.0406662	-0.356913	-0.0215591	-0.0796943	0.0204361	0.252628	0.788734	-1.11917	1.04687	-0.18405	-0.953421	2.66146	-0.838047	-1.23163	1.50445	-0.332015	-1.23154	1.50454	-0.331925	-1.23145	1.50463	-0.331835	-1.23136	1.50472	-0.331745	-1.23127	1.50481	-0.331655	-1.23118	1.5049	-0.331565	-1.23109	1.50499	-0.331475	-1.231	1.50508	-0.331385	-1.23091	1.50517	-0.331295	-1.23082	1.50526	-0.331205	-1.23073	1.50535	-0.331115	-1.23064	1.50544
ENSG00000158966	CACHD1	-0.102927	-1.36403	0.406606	0.694961	-0.682648	-3.10047	-1.10329	0.00687012	0.461458	0.356232	-0.260086	-0.255254	-0.63926	-0.944813	0.323568	0.147037	-0.944723	0.323658	0.147127	-0.944633	0.323748	0.147217	-0.944543	0.323838	0.147307	-0.944453	0.323928	0.147397	-0.944363	0.324018	0.147487	-0.944273	0.324108	0.147577	-0.944183	0.324198	0.147667	-0.944093	0.324288	0.147757	-0.944003	0.324378	0.147847	-0.943913	0.324468	0.147937	-0.943823	0.324558
ENSG00000162437	RAVER2	-0.039912	-1.54117	1.88813	-0.117653	0.185497	0.100471	-0.590742	-0.57386	-0.245956	0.359358	-0.0885679	0.445172	1.37446	-0.972334	-0.725304	-0.586709	-0.972244	-0.725214	-0.586619	-0.972154	-0.725124	-0.586529	-0.972064	-0.725034	-0.586439	-0.971974	-0.724944	-0.586349	-0.971884	-0.724854	-0.586259	-0.971794	-0.724764	-0.586169	-0.971704	-0.724674	-0.586079	-0.971614	-0.724584	-0.585989	-0.971524	-0.724494	-0.585899	-0.971434	-0.724404	-0.585809	-0.971344	-0.724314
ENSG00000226891	LINC01359	-0.143314	0.559475	1.22994	1.30996	0.664852	1.57037	0.625818	1.18752	0.899506	0.842602	0.392006	0.910473	0.0232888	0.908814	-0.398366	0.542145	0.908904	-0.398276	0.542235	0.908994	-0.398186	0.542325	0.909084	-0.398096	0.542415	0.909174	-0.398006	0.542505	0.909264	-0.397916	0.542595	0.909354	-0.397826	0.542685	0.909444	-0.397736	0.542775	0.909534	-0.397646	0.542865	0.909624	-0.397556	0.542955	0.909714	-0.397466	0.543045	0.909804	-0.397376
ENSG00000272506	NA	1.04705	0.201654	1.01884	0.580316	-0.00659023	1.37331	0.89464	0.7163	0.745135	0.876926	0.521681	0.848084	0.605015	0.229923	0.878727	1.01847	0.230013	0.878817	1.01856	0.230103	0.878907	1.01865	0.230193	0.878997	1.01874	0.230283	0.879087	1.01883	0.230373	0.879177	1.01892	0.230463	0.879267	1.01901	0.230553	0.879357	1.0191	0.230643	0.879447	1.01919	0.230733	0.879537	1.01928	0.230823	0.879627	1.01937	0.230913	0.879717
ENSG00000162433	AK4	0.00639547	-1.19709	-0.77047	-0.22604	0.449716	0.681178	-0.799946	1.67119	1.38451	1.09591	-0.0149756	-1.15202	2.25771	1.6458	1.00152	0.0540153	1.64589	1.00161	0.0541053	1.64598	1.0017	0.0541953	1.64607	1.00179	0.0542853	1.64616	1.00188	0.0543753	1.64625	1.00197	0.0544653	1.64634	1.00206	0.0545553	1.64643	1.00215	0.0546453	1.64652	1.00224	0.0547353	1.64661	1.00233	0.0548253	1.6467	1.00242	0.0549153	1.64679	1.00251
ENSG00000116675	DNAJC6	-1.39726	-0.490386	0.418512	1.2853	-0.330657	-0.557245	0.300747	-1.28742	-0.887188	1.03453	-0.429472	1.0063	0.14058	2.14486	0.0363826	1.13801	2.14495	0.0364726	1.1381	2.14504	0.0365626	1.13819	2.14513	0.0366526	1.13828	2.14522	0.0367426	1.13837	2.14531	0.0368326	1.13846	2.1454	0.0369226	1.13855	2.14549	0.0370126	1.13864	2.14558	0.0371026	1.13873	2.14567	0.0371926	1.13882	2.14576	0.0372826	1.13891	2.14585	0.0373726
ENSG00000213625	LEPROT	-0.868871	-1.03421	-0.731733	-1.37533	1.054	-0.686241	0.102947	1.90751	0.81868	1.95957	-0.441713	0.115817	1.28634	1.7885	1.39705	1.04018	1.78859	1.39714	1.04027	1.78868	1.39723	1.04036	1.78877	1.39732	1.04045	1.78886	1.39741	1.04054	1.78895	1.3975	1.04063	1.78904	1.39759	1.04072	1.78913	1.39768	1.04081	1.78922	1.39777	1.0409	1.78931	1.39786	1.04099	1.7894	1.39795	1.04108	1.78949	1.39804
ENSG00000116678	LEPR	-0.0821577	-0.786277	-0.697876	-0.248703	0.252097	0.00190964	-0.0477073	-0.129385	1.31332	1.15739	-0.21159	-0.464679	1.06057	1.72471	2.57404	1.47325	1.7248	2.57413	1.47334	1.72489	2.57422	1.47343	1.72498	2.57431	1.47352	1.72507	2.5744	1.47361	1.72516	2.57449	1.4737	1.72525	2.57458	1.47379	1.72534	2.57467	1.47388	1.72543	2.57476	1.47397	1.72552	2.57485	1.47406	1.72561	2.57494	1.47415	1.7257	2.57503
ENSG00000184588	PDE4B	-0.783093	-0.51203	-0.240949	1.12835	-0.154825	0.311045	0.284408	-0.962624	-1.32574	-0.849723	-0.868231	0.386915	0.594781	0.501606	-0.333622	-0.86573	0.501696	-0.333532	-0.86564	0.501786	-0.333442	-0.86555	0.501876	-0.333352	-0.86546	0.501966	-0.333262	-0.86537	0.502056	-0.333172	-0.86528	0.502146	-0.333082	-0.86519	0.502236	-0.332992	-0.8651	0.502326	-0.332902	-0.86501	0.502416	-0.332812	-0.86492	0.502506	-0.332722	-0.86483	0.502596	-0.332632
ENSG00000198160	MIER1	0.658668	-0.148886	-0.558426	0.714454	-0.716081	0.174229	0.0471701	-0.460876	0.0501276	0.109981	0.591139	-0.583409	-1.12659	-0.441921	-1.86482	-0.699638	-0.441831	-1.86473	-0.699548	-0.441741	-1.86464	-0.699458	-0.441651	-1.86455	-0.699368	-0.441561	-1.86446	-0.699278	-0.441471	-1.86437	-0.699188	-0.441381	-1.86428	-0.699098	-0.441291	-1.86419	-0.699008	-0.441201	-1.8641	-0.698918	-0.441111	-1.86401	-0.698828	-0.441021	-1.86392	-0.698738	-0.440931	-1.86383
ENSG00000116704	SLC35D1	-0.904714	-1.3113	-0.847048	1.51594	-1.53829	0.00893757	-0.373917	-0.669264	-0.252031	-0.0215462	0.131645	-0.514514	-0.128331	-1.32553	-0.000299012	-0.563741	-1.32544	-0.000209012	-0.563651	-1.32535	-0.000119012	-0.563561	-1.32526	-2.9012e-05	-0.563471	-1.32517	6.0988e-05	-0.563381	-1.32508	0.000150988	-0.563291	-1.32499	0.000240988	-0.563201	-1.3249	0.000330988	-0.563111	-1.32481	0.000420988	-0.563021	-1.32472	0.000510988	-0.562931	-1.32463	0.000600988	-0.562841	-1.32454	0.000690988
ENSG00000162594	IL23R	-0.839549	-1.0295	-0.0184733	-0.0395861	-0.0787758	-0.259429	-0.692634	-1.26482	-0.592839	-0.43112	-0.347388	-1.11388	-1.25735	-0.37507	-1.38617	0.66777	-0.37498	-1.38608	0.66786	-0.37489	-1.38599	0.66795	-0.3748	-1.3859	0.66804	-0.37471	-1.38581	0.66813	-0.37462	-1.38572	0.66822	-0.37453	-1.38563	0.66831	-0.37444	-1.38554	0.6684	-0.37435	-1.38545	0.66849	-0.37426	-1.38536	0.66858	-0.37417	-1.38527	0.66867	-0.37408	-1.38518
ENSG00000081985	IL12RB2	1.53135	0.735736	-1.03233	2.36648	-0.158529	2.6036	-0.900766	-0.98687	0.590629	0.134993	-0.0501094	-1.46222	0.176759	-1.00149	-1.64996	-0.0445088	-1.0014	-1.64987	-0.0444188	-1.00131	-1.64978	-0.0443288	-1.00122	-1.64969	-0.0442388	-1.00113	-1.6496	-0.0441488	-1.00104	-1.64951	-0.0440588	-1.00095	-1.64942	-0.0439688	-1.00086	-1.64933	-0.0438788	-1.00077	-1.64924	-0.0437888	-1.00068	-1.64915	-0.0436988	-1.00059	-1.64906	-0.0436088	-1.0005	-1.64897
ENSG00000116717	GADD45A	-0.498345	-0.0982041	-0.296658	1.97877	-0.042941	0.629537	0.0790646	0.100017	0.773914	0.157818	-0.700246	0.553442	0.948898	1.08109	-0.0884253	-0.237602	1.08118	-0.0883353	-0.237512	1.08127	-0.0882453	-0.237422	1.08136	-0.0881553	-0.237332	1.08145	-0.0880653	-0.237242	1.08154	-0.0879753	-0.237152	1.08163	-0.0878853	-0.237062	1.08172	-0.0877953	-0.236972	1.08181	-0.0877053	-0.236882	1.0819	-0.0876153	-0.236792	1.08199	-0.0875253	-0.236702	1.08208	-0.0874353
ENSG00000116729	WLS	-1.91093	-1.22426	-2.45376	-2.07901	1.03883	-0.261558	0.241862	1.57868	-0.257142	0.041557	0.382626	-1.28066	0.374717	-0.771733	-0.103017	-0.335513	-0.771643	-0.102927	-0.335423	-0.771553	-0.102837	-0.335333	-0.771463	-0.102747	-0.335243	-0.771373	-0.102657	-0.335153	-0.771283	-0.102567	-0.335063	-0.771193	-0.102477	-0.334973	-0.771103	-0.102387	-0.334883	-0.771013	-0.102297	-0.334793	-0.770923	-0.102207	-0.334703	-0.770833	-0.102117	-0.334613	-0.770743	-0.102027
ENSG00000024526	DEPDC1	0.73214	0.428247	1.37851	0.901	0.854319	1.57078	0.86649	0.914662	0.415857	1.52812	0.971801	0.0268585	1.22381	1.22389	0.550419	0.777565	1.22398	0.550509	0.777655	1.22407	0.550599	0.777745	1.22416	0.550689	0.777835	1.22425	0.550779	0.777925	1.22434	0.550869	0.778015	1.22443	0.550959	0.778105	1.22452	0.551049	0.778195	1.22461	0.551139	0.778285	1.2247	0.551229	0.778375	1.22479	0.551319	0.778465	1.22488	0.551409
ENSG00000033122	LRRC7	0.406584	-1.72308	-0.561545	0.77564	0.802378	0.506487	1.06172	0.186744	-0.404888	0.594789	0.145129	1.373	0.421334	-0.298445	0.731594	-0.514835	-0.298355	0.731684	-0.514745	-0.298265	0.731774	-0.514655	-0.298175	0.731864	-0.514565	-0.298085	0.731954	-0.514475	-0.297995	0.732044	-0.514385	-0.297905	0.732134	-0.514295	-0.297815	0.732224	-0.514205	-0.297725	0.732314	-0.514115	-0.297635	0.732404	-0.514025	-0.297545	0.732494	-0.513935	-0.297455	0.732584
ENSG00000066557	LRRC40	-1.15152	-1.51148	0.615372	0.748926	-1.32061	1.07586	-0.23162	0.747388	0.456025	1.09342	0.843172	-1.3678	-0.703373	-0.711366	-2.09983	0.512955	-0.711276	-2.09974	0.513045	-0.711186	-2.09965	0.513135	-0.711096	-2.09956	0.513225	-0.711006	-2.09947	0.513315	-0.710916	-2.09938	0.513405	-0.710826	-2.09929	0.513495	-0.710736	-2.0992	0.513585	-0.710646	-2.09911	0.513675	-0.710556	-2.09902	0.513765	-0.710466	-2.09893	0.513855	-0.710376	-2.09884
ENSG00000116754	SRSF11	0.856827	-0.0626669	0.208422	0.538691	-0.994611	0.50062	0.592171	-1.87642	-0.927219	-0.10563	0.886668	-0.401181	-1.38907	-1.73856	-2.66381	-0.0453927	-1.73847	-2.66372	-0.0453027	-1.73838	-2.66363	-0.0452127	-1.73829	-2.66354	-0.0451227	-1.7382	-2.66345	-0.0450327	-1.73811	-2.66336	-0.0449427	-1.73802	-2.66327	-0.0448527	-1.73793	-2.66318	-0.0447627	-1.73784	-2.66309	-0.0446727	-1.73775	-2.663	-0.0445827	-1.73766	-2.66291	-0.0444927	-1.73757	-2.66282
ENSG00000197568	HHLA3	0.834172	0.68284	-0.0399049	-2.83566	-0.0923175	0.968991	0.286547	-0.845773	0.054599	-0.716348	0.0304014	2.57838	-0.073902	2.36861	0.0828263	-0.708017	2.3687	0.0829163	-0.707927	2.36879	0.0830063	-0.707837	2.36888	0.0830963	-0.707747	2.36897	0.0831863	-0.707657	2.36906	0.0832763	-0.707567	2.36915	0.0833663	-0.707477	2.36924	0.0834563	-0.707387	2.36933	0.0835463	-0.707297	2.36942	0.0836363	-0.707207	2.36951	0.0837263	-0.707117	2.3696	0.0838163
ENSG00000116761	CTH	-0.0934864	-1.29818	-1.42267	1.42469	-0.565354	-0.0757052	0.142552	-0.271247	-0.455127	-1.01944	-0.888544	-0.570563	0.642725	0.453067	-0.798048	-0.885849	0.453157	-0.797958	-0.885759	0.453247	-0.797868	-0.885669	0.453337	-0.797778	-0.885579	0.453427	-0.797688	-0.885489	0.453517	-0.797598	-0.885399	0.453607	-0.797508	-0.885309	0.453697	-0.797418	-0.885219	0.453787	-0.797328	-0.885129	0.453877	-0.797238	-0.885039	0.453967	-0.797148	-0.884949	0.454057	-0.797058
ENSG00000132485	ZRANB2	0.564306	-0.700975	0.84274	-0.166485	-0.671637	0.919741	-0.365078	-0.194214	-0.90389	0.418559	1.78953	-0.529821	-1.17161	-2.45829	-2.43619	0.641867	-2.4582	-2.4361	0.641957	-2.45811	-2.43601	0.642047	-2.45802	-2.43592	0.642137	-2.45793	-2.43583	0.642227	-2.45784	-2.43574	0.642317	-2.45775	-2.43565	0.642407	-2.45766	-2.43556	0.642497	-2.45757	-2.43547	0.642587	-2.45748	-2.43538	0.642677	-2.45739	-2.43529	0.642767	-2.4573	-2.4352
ENSG00000254685	FPGT	-0.893178	-0.833826	-1.32693	-2.15245	-0.918306	-0.242968	-0.685744	1.71928	0.321797	1.04853	0.67981	-2.40865	0.455067	-1.17996	-0.342705	0.149872	-1.17987	-0.342615	0.149962	-1.17978	-0.342525	0.150052	-1.17969	-0.342435	0.150142	-1.1796	-0.342345	0.150232	-1.17951	-0.342255	0.150322	-1.17942	-0.342165	0.150412	-1.17933	-0.342075	0.150502	-1.17924	-0.341985	0.150592	-1.17915	-0.341895	0.150682	-1.17906	-0.341805	0.150772	-1.17897	-0.341715
ENSG00000116791	CRYZ	-0.118729	0.661392	-0.329859	0.243538	1.24908	1.74987	-0.0892775	-1.34267	-1.27683	-0.365058	-0.345465	-0.0546396	0.0521805	-2.01353	-1.92007	-0.462998	-2.01344	-1.91998	-0.462908	-2.01335	-1.91989	-0.462818	-2.01326	-1.9198	-0.462728	-2.01317	-1.91971	-0.462638	-2.01308	-1.91962	-0.462548	-2.01299	-1.91953	-0.462458	-2.0129	-1.91944	-0.462368	-2.01281	-1.91935	-0.462278	-2.01272	-1.91926	-0.462188	-2.01263	-1.91917	-0.462098	-2.01254	-1.91908
ENSG00000162623	TYW3	0.935822	0.186596	0.553921	0.223018	-1.13348	0.206312	-0.285255	-1.51642	-1.52333	-0.288235	0.266331	-1.69009	0.642694	-0.749541	-2.38113	-1.18214	-0.749451	-2.38104	-1.18205	-0.749361	-2.38095	-1.18196	-0.749271	-2.38086	-1.18187	-0.749181	-2.38077	-1.18178	-0.749091	-2.38068	-1.18169	-0.749001	-2.38059	-1.1816	-0.748911	-2.3805	-1.18151	-0.748821	-2.38041	-1.18142	-0.748731	-2.38032	-1.18133	-0.748641	-2.38023	-1.18124	-0.748551	-2.38014
ENSG00000137955	RABGGTB	0.56689	-0.378211	1.32512	-0.453488	-0.28732	2.41509	-0.0199878	0.371541	0.644911	1.94483	0.210625	1.49898	-0.0895851	0.620055	-1.65455	-0.0422625	0.620145	-1.65446	-0.0421725	0.620235	-1.65437	-0.0420825	0.620325	-1.65428	-0.0419925	0.620415	-1.65419	-0.0419025	0.620505	-1.6541	-0.0418125	0.620595	-1.65401	-0.0417225	0.620685	-1.65392	-0.0416325	0.620775	-1.65383	-0.0415425	0.620865	-1.65374	-0.0414525	0.620955	-1.65365	-0.0413625	0.621045	-1.65356
ENSG00000184005	ST6GALNAC3	-0.257947	-3.25246	-1.71675	-0.816437	-0.574709	-0.888448	-1.10382	2.23931	0.59532	0.657197	0.698931	-1.06473	1.12605	0.775887	-0.114757	0.199351	0.775977	-0.114667	0.199441	0.776067	-0.114577	0.199531	0.776157	-0.114487	0.199621	0.776247	-0.114397	0.199711	0.776337	-0.114307	0.199801	0.776427	-0.114217	0.199891	0.776517	-0.114127	0.199981	0.776607	-0.114037	0.200071	0.776697	-0.113947	0.200161	0.776787	-0.113857	0.200251	0.776877	-0.113767
ENSG00000142892	PIGK	0.491337	-1.30548	1.57732	-0.257127	0.00461347	1.87687	0.922454	0.437319	-0.47751	0.670488	1.23105	-0.85954	-0.171191	-0.106784	-2.80673	0.0197067	-0.106694	-2.80664	0.0197967	-0.106604	-2.80655	0.0198867	-0.106514	-2.80646	0.0199767	-0.106424	-2.80637	0.0200667	-0.106334	-2.80628	0.0201567	-0.106244	-2.80619	0.0202467	-0.106154	-2.8061	0.0203367	-0.106064	-2.80601	0.0204267	-0.105974	-2.80592	0.0205167	-0.105884	-2.80583	0.0206067	-0.105794	-2.80574
ENSG00000154027	AK5	0.792631	-0.94541	-0.357978	0.0184104	-0.630599	0.484225	0.366623	-0.907357	-0.922189	-2.33034	0.350532	-0.461248	-1.8405	-1.06088	-1.836	-1.04224	-1.06079	-1.83591	-1.04215	-1.0607	-1.83582	-1.04206	-1.06061	-1.83573	-1.04197	-1.06052	-1.83564	-1.04188	-1.06043	-1.83555	-1.04179	-1.06034	-1.83546	-1.0417	-1.06025	-1.83537	-1.04161	-1.06016	-1.83528	-1.04152	-1.06007	-1.83519	-1.04143	-1.05998	-1.8351	-1.04134	-1.05989	-1.83501
ENSG00000036549	ZZZ3	-0.468136	-0.677257	-0.168355	0.842863	-0.999607	-0.36243	-0.0810317	-1.15353	-0.706467	-0.603635	0.201859	-0.449854	-1.80074	-1.11057	-2.88973	-0.662815	-1.11048	-2.88964	-0.662725	-1.11039	-2.88955	-0.662635	-1.1103	-2.88946	-0.662545	-1.11021	-2.88937	-0.662455	-1.11012	-2.88928	-0.662365	-1.11003	-2.88919	-0.662275	-1.10994	-2.8891	-0.662185	-1.10985	-2.88901	-0.662095	-1.10976	-2.88892	-0.662005	-1.10967	-2.88883	-0.661915	-1.10958	-2.88874
ENSG00000180488	MIGA1	0.67703	-0.236369	-0.0952374	-0.0863216	0.102823	-0.16626	0.177761	-0.214595	-1.67732	-0.53563	0.0548572	-1.05786	-1.61855	-2.64349	-1.74075	-0.596583	-2.6434	-1.74066	-0.596493	-2.64331	-1.74057	-0.596403	-2.64322	-1.74048	-0.596313	-2.64313	-1.74039	-0.596223	-2.64304	-1.7403	-0.596133	-2.64295	-1.74021	-0.596043	-2.64286	-1.74012	-0.595953	-2.64277	-1.74003	-0.595863	-2.64268	-1.73994	-0.595773	-2.64259	-1.73985	-0.595683	-2.6425	-1.73976
ENSG00000162614	NEXN	1.02338	2.18703	0.601443	-2.35805	-0.435057	-0.320773	-1.07017	1.25218	2.15542	1.15426	0.35539	-0.124076	-0.701612	0.775521	1.81572	0.805842	0.775611	1.81581	0.805932	0.775701	1.8159	0.806022	0.775791	1.81599	0.806112	0.775881	1.81608	0.806202	0.775971	1.81617	0.806292	0.776061	1.81626	0.806382	0.776151	1.81635	0.806472	0.776241	1.81644	0.806562	0.776331	1.81653	0.806652	0.776421	1.81662	0.806742	0.776511	1.81671
ENSG00000162616	DNAJB4	-0.17438	-0.222897	-0.591083	2.17911	-1.43916	-0.243565	-0.428432	-0.293877	-0.633354	-0.115184	-0.358444	-0.987567	-0.680055	-1.0008	-1.03683	-0.593991	-1.00071	-1.03674	-0.593901	-1.00062	-1.03665	-0.593811	-1.00053	-1.03656	-0.593721	-1.00044	-1.03647	-0.593631	-1.00035	-1.03638	-0.593541	-1.00026	-1.03629	-0.593451	-1.00017	-1.0362	-0.593361	-1.00008	-1.03611	-0.593271	-0.999992	-1.03602	-0.593181	-0.999902	-1.03593	-0.593091	-0.999812	-1.03584
ENSG00000273338	NA	0.832277	0.771446	0.576641	-0.54639	1.08541	1.39437	0.917333	1.59124	-1.10018	0.0494021	1.09058	-0.431389	-0.644113	-0.0232714	-0.479519	0.0826468	-0.0231814	-0.479429	0.0827368	-0.0230914	-0.479339	0.0828268	-0.0230014	-0.479249	0.0829168	-0.0229114	-0.479159	0.0830068	-0.0228214	-0.479069	0.0830968	-0.0227314	-0.478979	0.0831868	-0.0226414	-0.478889	0.0832768	-0.0225514	-0.478799	0.0833668	-0.0224614	-0.478709	0.0834568	-0.0223714	-0.478619	0.0835468	-0.0222814	-0.478529
ENSG00000137959	IFI44L	1.63212	2.78806	1.09594	-0.419125	-0.828046	0.52304	-0.291407	1.89106	2.35903	-0.363199	-0.238352	-0.690961	-0.252186	-1.60411	-0.288321	-0.480379	-1.60402	-0.288231	-0.480289	-1.60393	-0.288141	-0.480199	-1.60384	-0.288051	-0.480109	-1.60375	-0.287961	-0.480019	-1.60366	-0.287871	-0.479929	-1.60357	-0.287781	-0.479839	-1.60348	-0.287691	-0.479749	-1.60339	-0.287601	-0.479659	-1.6033	-0.287511	-0.479569	-1.60321	-0.287421	-0.479479	-1.60312	-0.287331
ENSG00000137965	IFI44	1.65539	2.73812	0.908488	-0.330315	-0.698079	0.545656	-0.371483	2.21478	2.43724	-0.0379053	-0.0748898	-1.10974	0.27074	-1.02909	-0.382228	-0.541451	-1.029	-0.382138	-0.541361	-1.02891	-0.382048	-0.541271	-1.02882	-0.381958	-0.541181	-1.02873	-0.381868	-0.541091	-1.02864	-0.381778	-0.541001	-1.02855	-0.381688	-0.540911	-1.02846	-0.381598	-0.540821	-1.02837	-0.381508	-0.540731	-1.02828	-0.381418	-0.540641	-1.02819	-0.381328	-0.540551	-1.0281	-0.381238
ENSG00000234184	LINC01781	0.588313	0.741732	1.28892	-0.576876	-1.13336	-0.0074118	0.373882	0.276912	-1.12045	0.431409	0.962472	-1.02075	-0.17294	-0.15534	-0.0532875	1.02808	-0.15525	-0.0531975	1.02817	-0.15516	-0.0531075	1.02826	-0.15507	-0.0530175	1.02835	-0.15498	-0.0529275	1.02844	-0.15489	-0.0528375	1.02853	-0.1548	-0.0527475	1.02862	-0.15471	-0.0526575	1.02871	-0.15462	-0.0525675	1.0288	-0.15453	-0.0524775	1.02889	-0.15444	-0.0523875	1.02898	-0.15435	-0.0522975
ENSG00000137941	TTLL7	-0.563981	-0.156007	1.02641	-0.0417711	0.611913	-0.118776	0.0603379	0.742989	1.17156	2.02008	1.1123	0.634347	0.869689	2.18367	1.621	1.53449	2.18376	1.62109	1.53458	2.18385	1.62118	1.53467	2.18394	1.62127	1.53476	2.18403	1.62136	1.53485	2.18412	1.62145	1.53494	2.18421	1.62154	1.53503	2.1843	1.62163	1.53512	2.18439	1.62172	1.53521	2.18448	1.62181	1.5353	2.18457	1.6219	1.53539	2.18466	1.62199
ENSG00000142875	PRKACB	0.159822	0.00109259	-0.0770739	0.0614176	-1.23816	-0.109875	0.224294	-2.16756	-0.741874	0.256271	0.802573	-1.3277	-1.4921	-2.77892	-1.52141	0.640732	-2.77883	-1.52132	0.640822	-2.77874	-1.52123	0.640912	-2.77865	-1.52114	0.641002	-2.77856	-1.52105	0.641092	-2.77847	-1.52096	0.641182	-2.77838	-1.52087	0.641272	-2.77829	-1.52078	0.641362	-2.7782	-1.52069	0.641452	-2.77811	-1.5206	0.641542	-2.77802	-1.52051	0.641632	-2.77793	-1.52042
ENSG00000174021	GNG5	0.813914	0.897874	-0.0545617	-0.578798	1.3989	1.41344	0.035623	1.85058	1.04392	0.712089	0.541379	0.121499	0.96927	2.20149	0.488705	0.0369999	2.20158	0.488795	0.0370899	2.20167	0.488885	0.0371799	2.20176	0.488975	0.0372699	2.20185	0.489065	0.0373599	2.20194	0.489155	0.0374499	2.20203	0.489245	0.0375399	2.20212	0.489335	0.0376299	2.20221	0.489425	0.0377199	2.2023	0.489515	0.0378099	2.20239	0.489605	0.0378999	2.20248	0.489695
ENSG00000285851	NA	-0.946987	-0.120723	1.24747	-2.42999	0.826148	0.402445	-0.765052	1.39054	1.14336	0.433208	0.645591	1.06788	0.663168	-1.75818	0.736059	1.17162	-1.75809	0.736149	1.17171	-1.758	0.736239	1.1718	-1.75791	0.736329	1.17189	-1.75782	0.736419	1.17198	-1.75773	0.736509	1.17207	-1.75764	0.736599	1.17216	-1.75755	0.736689	1.17225	-1.75746	0.736779	1.17234	-1.75737	0.736869	1.17243	-1.75728	0.736959	1.17252	-1.75719	0.737049
ENSG00000117151	CTBS	-0.00664407	1.3676	-0.293634	-1.34689	-0.30169	0.907436	0.734835	2.30312	2.46898	0.561411	-0.110497	-0.98385	0.900216	0.252808	-0.111804	-0.6965	0.252898	-0.111714	-0.69641	0.252988	-0.111624	-0.69632	0.253078	-0.111534	-0.69623	0.253168	-0.111444	-0.69614	0.253258	-0.111354	-0.69605	0.253348	-0.111264	-0.69596	0.253438	-0.111174	-0.69587	0.253528	-0.111084	-0.69578	0.253618	-0.110994	-0.69569	0.253708	-0.110904	-0.6956	0.253798	-0.110814
ENSG00000284882	LOC105378819	0.506166	-0.692738	0.0593513	-3.3785	0.146862	-0.42441	-2.20805	-0.355358	1.37139	1.37994	-0.758842	0.308442	1.28558	-0.223067	-0.555519	0.774432	-0.222977	-0.555429	0.774522	-0.222887	-0.555339	0.774612	-0.222797	-0.555249	0.774702	-0.222707	-0.555159	0.774792	-0.222617	-0.555069	0.774882	-0.222527	-0.554979	0.774972	-0.222437	-0.554889	0.775062	-0.222347	-0.554799	0.775152	-0.222257	-0.554709	0.775242	-0.222167	-0.554619	0.775332	-0.222077	-0.554529
ENSG00000117155	SSX2IP	-0.119859	0.100678	0.83348	-0.13637	-0.358279	0.180785	0.254354	-1.27126	0.92786	1.90889	0.649615	-0.802977	-0.596656	1.42628	1.61029	1.588	1.42637	1.61038	1.58809	1.42646	1.61047	1.58818	1.42655	1.61056	1.58827	1.42664	1.61065	1.58836	1.42673	1.61074	1.58845	1.42682	1.61083	1.58854	1.42691	1.61092	1.58863	1.427	1.61101	1.58872	1.42709	1.6111	1.58881	1.42718	1.61119	1.5889	1.42727	1.61128
ENSG00000153898	MCOLN2	0.751054	1.3781	0.194493	0.528004	-0.712417	-0.877292	0.258798	-2.44677	-0.721633	0.115603	-0.969201	1.20469	-0.35446	-1.4542	-2.24294	0.504304	-1.45411	-2.24285	0.504394	-1.45402	-2.24276	0.504484	-1.45393	-2.24267	0.504574	-1.45384	-2.24258	0.504664	-1.45375	-2.24249	0.504754	-1.45366	-2.2424	0.504844	-1.45357	-2.24231	0.504934	-1.45348	-2.24222	0.505024	-1.45339	-2.24213	0.505114	-1.4533	-2.24204	0.505204	-1.45321	-2.24195
ENSG00000162643	DNAI3	1.3337	2.2439	0.203617	0.930413	-0.46146	-0.0657157	1.30043	-0.585138	-1.47765	-0.355868	0.791619	-0.713656	0.484893	-0.578294	-1.17758	0.66504	-0.578204	-1.17749	0.66513	-0.578114	-1.1774	0.66522	-0.578024	-1.17731	0.66531	-0.577934	-1.17722	0.6654	-0.577844	-1.17713	0.66549	-0.577754	-1.17704	0.66558	-0.577664	-1.17695	0.66567	-0.577574	-1.17686	0.66576	-0.577484	-1.17677	0.66585	-0.577394	-1.17668	0.66594	-0.577304	-1.17659
ENSG00000055732	MCOLN3	1.2009	1.06797	0.624474	0.569083	-0.387784	-0.580704	0.57741	-0.223352	-3.03512	-1.18932	1.22693	-1.5749	-0.518739	1.14841	-1.59481	-0.5596	1.1485	-1.59472	-0.55951	1.14859	-1.59463	-0.55942	1.14868	-1.59454	-0.55933	1.14877	-1.59445	-0.55924	1.14886	-1.59436	-0.55915	1.14895	-1.59427	-0.55906	1.14904	-1.59418	-0.55897	1.14913	-1.59409	-0.55888	1.14922	-1.594	-0.55879	1.14931	-1.59391	-0.5587	1.1494	-1.59382
ENSG00000097096	SYDE2	0.312066	0.608013	-0.654512	1.37605	-1.49604	0.13045	-0.273453	-2.96235	-1.42652	-0.262326	0.250959	1.73012	0.200287	-0.585006	-1.29706	-0.421074	-0.584916	-1.29697	-0.420984	-0.584826	-1.29688	-0.420894	-0.584736	-1.29679	-0.420804	-0.584646	-1.2967	-0.420714	-0.584556	-1.29661	-0.420624	-0.584466	-1.29652	-0.420534	-0.584376	-1.29643	-0.420444	-0.584286	-1.29634	-0.420354	-0.584196	-1.29625	-0.420264	-0.584106	-1.29616	-0.420174	-0.584016	-1.29607
ENSG00000162642	C1orf52	0.777159	0.936452	-0.0480391	0.127635	-0.671917	-1.00297	-0.253639	-1.1273	-0.875958	0.373383	-0.627556	-0.840346	-1.01377	-1.21003	-1.78574	-0.296419	-1.20994	-1.78565	-0.296329	-1.20985	-1.78556	-0.296239	-1.20976	-1.78547	-0.296149	-1.20967	-1.78538	-0.296059	-1.20958	-1.78529	-0.295969	-1.20949	-1.7852	-0.295879	-1.2094	-1.78511	-0.295789	-1.20931	-1.78502	-0.295699	-1.20922	-1.78493	-0.295609	-1.20913	-1.78484	-0.295519	-1.20904	-1.78475
ENSG00000142867	BCL10	-0.523072	0.445406	-0.806597	0.159668	1.11949	0.84123	-0.0379298	-0.771698	-0.474011	0.87409	0.486534	0.12005	0.211616	1.30775	-0.816814	-0.321393	1.30784	-0.816724	-0.321303	1.30793	-0.816634	-0.321213	1.30802	-0.816544	-0.321123	1.30811	-0.816454	-0.321033	1.3082	-0.816364	-0.320943	1.30829	-0.816274	-0.320853	1.30838	-0.816184	-0.320763	1.30847	-0.816094	-0.320673	1.30856	-0.816004	-0.320583	1.30865	-0.815914	-0.320493	1.30874	-0.815824
ENSG00000223653	NA	0.19046	0.347379	0.199318	0.94616	0.689342	-0.419774	0.540346	-0.464879	-0.205942	0.309845	0.735585	0.944371	0.982812	0.865001	-0.47232	-0.135348	0.865091	-0.47223	-0.135258	0.865181	-0.47214	-0.135168	0.865271	-0.47205	-0.135078	0.865361	-0.47196	-0.134988	0.865451	-0.47187	-0.134898	0.865541	-0.47178	-0.134808	0.865631	-0.47169	-0.134718	0.865721	-0.4716	-0.134628	0.865811	-0.47151	-0.134538	0.865901	-0.47142	-0.134448	0.865991	-0.47133
ENSG00000117174	ZNHIT6	1.16749	-0.0304705	0.644628	1.1167	-0.464555	0.500481	0.0167241	-1.44964	-1.01712	0.344108	0.626929	-1.04746	-0.987737	-2.21553	-3.28595	0.823436	-2.21544	-3.28586	0.823526	-2.21535	-3.28577	0.823616	-2.21526	-3.28568	0.823706	-2.21517	-3.28559	0.823796	-2.21508	-3.2855	0.823886	-2.21499	-3.28541	0.823976	-2.2149	-3.28532	0.824066	-2.21481	-3.28523	0.824156	-2.21472	-3.28514	0.824246	-2.21463	-3.28505	0.824336	-2.21454	-3.28496
ENSG00000171502	COL24A1	-0.256333	-0.682133	1.96142	0.460958	0.381957	1.53111	0.832934	1.07195	1.39313	1.88565	-0.309544	-0.221909	1.37821	1.04094	0.727972	0.437983	1.04103	0.728062	0.438073	1.04112	0.728152	0.438163	1.04121	0.728242	0.438253	1.0413	0.728332	0.438343	1.04139	0.728422	0.438433	1.04148	0.728512	0.438523	1.04157	0.728602	0.438613	1.04166	0.728692	0.438703	1.04175	0.728782	0.438793	1.04184	0.728872	0.438883	1.04193	0.728962
ENSG00000122417	ODF2L	1.57078	2.25578	1.01734	0.499169	-0.432786	-0.0851287	0.597986	-1.87862	-1.03208	-0.725872	0.32699	-0.115816	-1.05717	-1.8557	-2.33814	0.236783	-1.85561	-2.33805	0.236873	-1.85552	-2.33796	0.236963	-1.85543	-2.33787	0.237053	-1.85534	-2.33778	0.237143	-1.85525	-2.33769	0.237233	-1.85516	-2.3376	0.237323	-1.85507	-2.33751	0.237413	-1.85498	-2.33742	0.237503	-1.85489	-2.33733	0.237593	-1.8548	-2.33724	0.237683	-1.85471	-2.33715
ENSG00000261737	CLCA4-AS1	0.0351342	0.777591	-0.0119382	-2.09611	-0.0233252	1.40837	0.311021	1.52162	1.95889	1.20918	0.691761	-0.347802	0.386735	0.770089	-1.47785	0.703467	0.770179	-1.47776	0.703557	0.770269	-1.47767	0.703647	0.770359	-1.47758	0.703737	0.770449	-1.47749	0.703827	0.770539	-1.4774	0.703917	0.770629	-1.47731	0.704007	0.770719	-1.47722	0.704097	0.770809	-1.47713	0.704187	0.770899	-1.47704	0.704277	0.770989	-1.47695	0.704367	0.771079	-1.47686
ENSG00000097033	SH3GLB1	-0.0180648	0.103911	-0.488927	-0.795791	0.172659	1.34226	0.22029	2.62443	2.30038	1.10199	-0.37692	-0.812934	0.76075	1.54433	-0.00166393	-0.270653	1.54442	-0.00157393	-0.270563	1.54451	-0.00148393	-0.270473	1.5446	-0.00139393	-0.270383	1.54469	-0.00130393	-0.270293	1.54478	-0.00121393	-0.270203	1.54487	-0.00112393	-0.270113	1.54496	-0.00103393	-0.270023	1.54505	-0.00094393	-0.269933	1.54514	-0.00085393	-0.269843	1.54523	-0.00076393	-0.269753	1.54532	-0.00067393
ENSG00000153936	HS2ST1	-0.633432	-3.08095	1.5236	-0.746905	-1.02912	1.23129	0.113532	0.661213	0.763757	1.03735	0.402303	-0.899667	0.316922	-1.16612	-2.00389	0.881865	-1.16603	-2.0038	0.881955	-1.16594	-2.00371	0.882045	-1.16585	-2.00362	0.882135	-1.16576	-2.00353	0.882225	-1.16567	-2.00344	0.882315	-1.16558	-2.00335	0.882405	-1.16549	-2.00326	0.882495	-1.1654	-2.00317	0.882585	-1.16531	-2.00308	0.882675	-1.16522	-2.00299	0.882765	-1.16513	-2.0029
ENSG00000143013	LMO4	1.11475	1.27444	-0.114971	-0.953641	0.854431	1.60193	0.561372	0.880977	0.425351	0.503597	0.152712	-1.02557	1.31599	0.22737	-1.56053	0.816141	0.22746	-1.56044	0.816231	0.22755	-1.56035	0.816321	0.22764	-1.56026	0.816411	0.22773	-1.56017	0.816501	0.22782	-1.56008	0.816591	0.22791	-1.55999	0.816681	0.228	-1.5599	0.816771	0.22809	-1.55981	0.816861	0.22818	-1.55972	0.816951	0.22827	-1.55963	0.817041	0.22836	-1.55954
ENSG00000065243	PKN2	-0.825616	-1.12744	-0.0373577	0.789407	-0.700381	-0.66648	-0.61625	0.561579	0.00603859	-0.0489035	-0.348036	-0.472898	-0.704282	-1.28302	-1.01425	-0.416432	-1.28293	-1.01416	-0.416342	-1.28284	-1.01407	-0.416252	-1.28275	-1.01398	-0.416162	-1.28266	-1.01389	-0.416072	-1.28257	-1.0138	-0.415982	-1.28248	-1.01371	-0.415892	-1.28239	-1.01362	-0.415802	-1.2823	-1.01353	-0.415712	-1.28221	-1.01344	-0.415622	-1.28212	-1.01335	-0.415532	-1.28203	-1.01326
ENSG00000137947	GTF2B	-0.136884	-0.133763	-0.637884	1.59058	-0.94815	-0.123507	-0.652125	-0.514383	-0.480553	-0.456807	-0.385281	-0.911605	-0.876546	-0.702159	-0.889913	-0.494382	-0.702069	-0.889823	-0.494292	-0.701979	-0.889733	-0.494202	-0.701889	-0.889643	-0.494112	-0.701799	-0.889553	-0.494022	-0.701709	-0.889463	-0.493932	-0.701619	-0.889373	-0.493842	-0.701529	-0.889283	-0.493752	-0.701439	-0.889193	-0.493662	-0.701349	-0.889103	-0.493572	-0.701259	-0.889013	-0.493482	-0.701169	-0.888923
ENSG00000137944	KYAT3	1.58717	0.0779096	0.383699	-0.989737	-0.0359166	0.724456	0.0156043	0.120846	-0.706233	0.49503	0.393344	-0.940244	-0.387445	-0.937156	-3.99995	0.178981	-0.937066	-3.99986	0.179071	-0.936976	-3.99977	0.179161	-0.936886	-3.99968	0.179251	-0.936796	-3.99959	0.179341	-0.936706	-3.9995	0.179431	-0.936616	-3.99941	0.179521	-0.936526	-3.99932	0.179611	-0.936436	-3.99923	0.179701	-0.936346	-3.99914	0.179791	-0.936256	-3.99905	0.179881	-0.936166	-3.99896
ENSG00000213516	RBMXL1	-0.605597	0.201962	-0.265747	0.791269	-1.3658	0.3434	-0.523988	-0.740766	0.290936	0.396489	-0.614787	0.100114	0.233838	-0.480971	-1.53829	-1.43149	-0.480881	-1.5382	-1.4314	-0.480791	-1.53811	-1.43131	-0.480701	-1.53802	-1.43122	-0.480611	-1.53793	-1.43113	-0.480521	-1.53784	-1.43104	-0.480431	-1.53775	-1.43095	-0.480341	-1.53766	-1.43086	-0.480251	-1.53757	-1.43077	-0.480161	-1.53748	-1.43068	-0.480071	-1.53739	-1.43059	-0.479981	-1.5373
ENSG00000117226	GBP3	0.842467	1.70066	-0.248305	-0.795664	-0.73683	-0.375619	-1.43409	0.834613	-0.2607	-0.527733	0.150727	-1.57733	-1.93808	-1.64577	-1.48664	0.212263	-1.64568	-1.48655	0.212353	-1.64559	-1.48646	0.212443	-1.6455	-1.48637	0.212533	-1.64541	-1.48628	0.212623	-1.64532	-1.48619	0.212713	-1.64523	-1.4861	0.212803	-1.64514	-1.48601	0.212893	-1.64505	-1.48592	0.212983	-1.64496	-1.48583	0.213073	-1.64487	-1.48574	0.213163	-1.64478	-1.48565
ENSG00000117228	GBP1	1.26639	2.69553	0.259752	-1.55007	-1.30502	0.153555	-0.442857	1.4615	1.43464	0.195556	0.495745	-1.55357	-0.684684	-1.00813	-0.0529871	0.0751584	-1.00804	-0.0528971	0.0752484	-1.00795	-0.0528071	0.0753384	-1.00786	-0.0527171	0.0754284	-1.00777	-0.0526271	0.0755184	-1.00768	-0.0525371	0.0756084	-1.00759	-0.0524471	0.0756984	-1.0075	-0.0523571	0.0757884	-1.00741	-0.0522671	0.0758784	-1.00732	-0.0521771	0.0759684	-1.00723	-0.0520871	0.0760584	-1.00714	-0.0519971
ENSG00000162645	GBP2	0.701401	0.918493	-1.55278	-1.61777	-1.34448	-0.264291	-0.66062	2.10422	0.132562	0.732203	0.707253	-1.56947	-0.987004	-1.00795	0.252166	0.453881	-1.00786	0.252256	0.453971	-1.00777	0.252346	0.454061	-1.00768	0.252436	0.454151	-1.00759	0.252526	0.454241	-1.0075	0.252616	0.454331	-1.00741	0.252706	0.454421	-1.00732	0.252796	0.454511	-1.00723	0.252886	0.454601	-1.00714	0.252976	0.454691	-1.00705	0.253066	0.454781	-1.00696	0.253156
ENSG00000162654	GBP4	-0.379933	1.97522	-0.399761	-0.704275	-0.679736	-0.0367983	0.564649	0.721041	0.213395	-0.0231505	0.243002	-1.59771	-1.96855	-3.06068	-0.559487	0.325365	-3.06059	-0.559397	0.325455	-3.0605	-0.559307	0.325545	-3.06041	-0.559217	0.325635	-3.06032	-0.559127	0.325725	-3.06023	-0.559037	0.325815	-3.06014	-0.558947	0.325905	-3.06005	-0.558857	0.325995	-3.05996	-0.558767	0.326085	-3.05987	-0.558677	0.326175	-3.05978	-0.558587	0.326265	-3.05969	-0.558497
ENSG00000284734	NA	0.996497	0.900443	0.443182	-0.64998	0.127025	-0.810524	0.18857	-0.95671	0.295207	-0.388056	0.953285	-0.565917	-1.82853	-3.24214	-0.920136	0.964201	-3.24205	-0.920046	0.964291	-3.24196	-0.919956	0.964381	-3.24187	-0.919866	0.964471	-3.24178	-0.919776	0.964561	-3.24169	-0.919686	0.964651	-3.2416	-0.919596	0.964741	-3.24151	-0.919506	0.964831	-3.24142	-0.919416	0.964921	-3.24133	-0.919326	0.965011	-3.24124	-0.919236	0.965101	-3.24115	-0.919146
ENSG00000154451	GBP5	1.02019	1.01969	0.00500376	0.188302	-0.644687	0.490694	0.579682	-0.846107	-0.844349	0.277553	0.652907	-1.25941	-1.3474	-2.98328	-1.57371	0.806385	-2.98319	-1.57362	0.806475	-2.9831	-1.57353	0.806565	-2.98301	-1.57344	0.806655	-2.98292	-1.57335	0.806745	-2.98283	-1.57326	0.806835	-2.98274	-1.57317	0.806925	-2.98265	-1.57308	0.807015	-2.98256	-1.57299	0.807105	-2.98247	-1.5729	0.807195	-2.98238	-1.57281	0.807285	-2.98229	-1.57272
ENSG00000225492	GBP1P1	1.65209	2.93582	0.0535319	-0.73682	-0.585818	-0.201631	-0.178594	1.40531	1.25173	0.311526	-1.16869	-1.48222	-0.772849	-1.85291	0.458606	0.394516	-1.85282	0.458696	0.394606	-1.85273	0.458786	0.394696	-1.85264	0.458876	0.394786	-1.85255	0.458966	0.394876	-1.85246	0.459056	0.394966	-1.85237	0.459146	0.395056	-1.85228	0.459236	0.395146	-1.85219	0.459326	0.395236	-1.8521	0.459416	0.395326	-1.85201	0.459506	0.395416	-1.85192	0.459596
ENSG00000286548	NA	1.56609	0.356809	-1.19233	0.0626627	1.26393	-0.636069	-0.798777	-2.95973	-1.10539	0.941436	-0.173015	1.34782	0.167441	-0.135219	0.160544	1.33871	-0.135129	0.160634	1.3388	-0.135039	0.160724	1.33889	-0.134949	0.160814	1.33898	-0.134859	0.160904	1.33907	-0.134769	0.160994	1.33916	-0.134679	0.161084	1.33925	-0.134589	0.161174	1.33934	-0.134499	0.161264	1.33943	-0.134409	0.161354	1.33952	-0.134319	0.161444	1.33961	-0.134229	0.161534
ENSG00000197147	LRRC8B	-0.637313	-0.756807	-0.0889662	0.676631	-0.811619	-2.30193	-1.18963	-1.47233	0.358936	0.659583	0.444383	-1.04878	-1.92571	-1.06865	0.557638	0.669143	-1.06856	0.557728	0.669233	-1.06847	0.557818	0.669323	-1.06838	0.557908	0.669413	-1.06829	0.557998	0.669503	-1.0682	0.558088	0.669593	-1.06811	0.558178	0.669683	-1.06802	0.558268	0.669773	-1.06793	0.558358	0.669863	-1.06784	0.558448	0.669953	-1.06775	0.558538	0.670043	-1.06766	0.558628
ENSG00000231999	LRRC8C-DT	0.136787	-0.862637	0.0385958	1.78981	-0.692554	-1.01651	-0.705517	-0.731725	-1.36763	0.203058	-0.0231662	-0.782594	-1.00084	-0.164286	-1.61063	-0.34215	-0.164196	-1.61054	-0.34206	-0.164106	-1.61045	-0.34197	-0.164016	-1.61036	-0.34188	-0.163926	-1.61027	-0.34179	-0.163836	-1.61018	-0.3417	-0.163746	-1.61009	-0.34161	-0.163656	-1.61	-0.34152	-0.163566	-1.60991	-0.34143	-0.163476	-1.60982	-0.34134	-0.163386	-1.60973	-0.34125	-0.163296	-1.60964
ENSG00000171488	LRRC8C	-0.513985	-0.456449	-0.677103	2.09625	-0.824554	-0.301642	-1.29878	-0.582145	0.147949	-0.014399	-0.610344	-1.71593	-0.00191443	-0.275398	-1.88926	-1.11667	-0.275308	-1.88917	-1.11658	-0.275218	-1.88908	-1.11649	-0.275128	-1.88899	-1.1164	-0.275038	-1.8889	-1.11631	-0.274948	-1.88881	-1.11622	-0.274858	-1.88872	-1.11613	-0.274768	-1.88863	-1.11604	-0.274678	-1.88854	-1.11595	-0.274588	-1.88845	-1.11586	-0.274498	-1.88836	-1.11577	-0.274408	-1.88827
ENSG00000171492	LRRC8D	-0.511058	-0.528023	-0.901032	-1.95108	-1.32709	-0.811354	-0.365696	1.99945	2.37902	-0.479418	0.103	-1.56653	0.306036	-0.473323	0.168488	0.519648	-0.473233	0.168578	0.519738	-0.473143	0.168668	0.519828	-0.473053	0.168758	0.519918	-0.472963	0.168848	0.520008	-0.472873	0.168938	0.520098	-0.472783	0.169028	0.520188	-0.472693	0.169118	0.520278	-0.472603	0.169208	0.520368	-0.472513	0.169298	0.520458	-0.472423	0.169388	0.520548	-0.472333	0.169478
ENSG00000162664	ZNF326	0.81534	0.0923854	0.394789	2.17415	-0.172124	2.22004	0.0251837	0.414739	0.735287	0.776526	-0.689472	0.329252	0.384701	0.983945	-1.12462	-0.176061	0.984035	-1.12453	-0.175971	0.984125	-1.12444	-0.175881	0.984215	-1.12435	-0.175791	0.984305	-1.12426	-0.175701	0.984395	-1.12417	-0.175611	0.984485	-1.12408	-0.175521	0.984575	-1.12399	-0.175431	0.984665	-1.1239	-0.175341	0.984755	-1.12381	-0.175251	0.984845	-1.12372	-0.175161	0.984935	-1.12363
ENSG00000122482	ZNF644	0.429621	0.0431062	-0.0187494	1.59296	-0.432628	-0.0693347	-0.462053	-0.933961	-0.773206	-0.77183	-0.257917	0.140484	-0.558587	-1.76443	-2.13041	-0.856033	-1.76434	-2.13032	-0.855943	-1.76425	-2.13023	-0.855853	-1.76416	-2.13014	-0.855763	-1.76407	-2.13005	-0.855673	-1.76398	-2.12996	-0.855583	-1.76389	-2.12987	-0.855493	-1.7638	-2.12978	-0.855403	-1.76371	-2.12969	-0.855313	-1.76362	-2.1296	-0.855223	-1.76353	-2.12951	-0.855133	-1.76344	-2.12942
ENSG00000097046	CDC7	0.346916	0.0288269	1.47616	1.16593	-0.455407	1.56735	1.21265	0.413425	-0.0369472	1.61947	1.78911	-0.633247	-0.159523	0.220245	-1.52085	1.03241	0.220335	-1.52076	1.0325	0.220425	-1.52067	1.03259	0.220515	-1.52058	1.03268	0.220605	-1.52049	1.03277	0.220695	-1.5204	1.03286	0.220785	-1.52031	1.03295	0.220875	-1.52022	1.03304	0.220965	-1.52013	1.03313	0.221055	-1.52004	1.03322	0.221145	-1.51995	1.03331	0.221235	-1.51986
ENSG00000069702	TGFBR3	0.675065	0.920791	-0.0546927	1.15606	-0.284819	0.698459	1.05565	-1.04492	-0.845421	-0.517141	-0.150578	-0.220292	-1.11372	-2.9934	-2.63602	0.139638	-2.99331	-2.63593	0.139728	-2.99322	-2.63584	0.139818	-2.99313	-2.63575	0.139908	-2.99304	-2.63566	0.139998	-2.99295	-2.63557	0.140088	-2.99286	-2.63548	0.140178	-2.99277	-2.63539	0.140268	-2.99268	-2.6353	0.140358	-2.99259	-2.63521	0.140448	-2.9925	-2.63512	0.140538	-2.99241	-2.63503
ENSG00000172031	EPHX4	1.22992	1.01356	1.04253	0.552212	0.231009	1.44115	1.78959	-0.816233	-0.94788	1.32647	0.0235348	-1.66873	-0.136186	-1.70669	-1.38728	1.46226	-1.7066	-1.38719	1.46235	-1.70651	-1.3871	1.46244	-1.70642	-1.38701	1.46253	-1.70633	-1.38692	1.46262	-1.70624	-1.38683	1.46271	-1.70615	-1.38674	1.4628	-1.70606	-1.38665	1.46289	-1.70597	-1.38656	1.46298	-1.70588	-1.38647	1.46307	-1.70579	-1.38638	1.46316	-1.7057	-1.38629
ENSG00000189195	BTBD8	0.443823	0.00845368	0.646937	1.16284	-0.490783	0.672784	1.03079	1.27299	0.211793	0.397946	1.45554	-0.0575695	-1.24077	-3.55557	-1.25973	1.00437	-3.55548	-1.25964	1.00446	-3.55539	-1.25955	1.00455	-3.5553	-1.25946	1.00464	-3.55521	-1.25937	1.00473	-3.55512	-1.25928	1.00482	-3.55503	-1.25919	1.00491	-3.55494	-1.2591	1.005	-3.55485	-1.25901	1.00509	-3.55476	-1.25892	1.00518	-3.55467	-1.25883	1.00527	-3.55458	-1.25874
ENSG00000174842	GLMN	1.42931	-0.0986815	0.979887	0.638191	-1.10325	0.998011	0.0312694	-1.21037	-1.10192	1.06215	1.13697	-1.44443	-0.324278	-2.62633	-2.00521	-0.404168	-2.62624	-2.00512	-0.404078	-2.62615	-2.00503	-0.403988	-2.62606	-2.00494	-0.403898	-2.62597	-2.00485	-0.403808	-2.62588	-2.00476	-0.403718	-2.62579	-2.00467	-0.403628	-2.6257	-2.00458	-0.403538	-2.62561	-2.00449	-0.403448	-2.62552	-2.0044	-0.403358	-2.62543	-2.00431	-0.403268	-2.62534	-2.00422
ENSG00000122484	RPAP2	1.68707	0.685105	0.878057	-0.17645	-1.64617	0.371293	0.0427179	-1.3334	-0.872992	-0.358548	1.11253	-0.208398	-1.79772	-2.31689	-2.32775	-0.331179	-2.3168	-2.32766	-0.331089	-2.31671	-2.32757	-0.330999	-2.31662	-2.32748	-0.330909	-2.31653	-2.32739	-0.330819	-2.31644	-2.3273	-0.330729	-2.31635	-2.32721	-0.330639	-2.31626	-2.32712	-0.330549	-2.31617	-2.32703	-0.330459	-2.31608	-2.32694	-0.330369	-2.31599	-2.32685	-0.330279	-2.3159	-2.32676
ENSG00000162676	GFI1	0.306641	1.31683	0.701846	0.624137	-0.164465	-0.0163667	1.1862	-0.754629	-0.739556	-0.0649291	0.0209216	-0.490804	-0.378432	-3.21145	-2.40363	1.12774	-3.21136	-2.40354	1.12783	-3.21127	-2.40345	1.12792	-3.21118	-2.40336	1.12801	-3.21109	-2.40327	1.1281	-3.211	-2.40318	1.12819	-3.21091	-2.40309	1.12828	-3.21082	-2.403	1.12837	-3.21073	-2.40291	1.12846	-3.21064	-2.40282	1.12855	-3.21055	-2.40273	1.12864	-3.21046	-2.40264
ENSG00000067208	EVI5	-1.07867	-2.26302	-1.1179	-1.6625	1.49898	-1.86732	-1.64869	1.47708	1.39726	-0.0350443	-0.529475	-0.0731873	0.435045	-0.119188	0.814621	-0.134172	-0.119098	0.814711	-0.134082	-0.119008	0.814801	-0.133992	-0.118918	0.814891	-0.133902	-0.118828	0.814981	-0.133812	-0.118738	0.815071	-0.133722	-0.118648	0.815161	-0.133632	-0.118558	0.815251	-0.133542	-0.118468	0.815341	-0.133452	-0.118378	0.815431	-0.133362	-0.118288	0.815521	-0.133272	-0.118198	0.815611
ENSG00000223896	NA	-1.53089	-0.498538	0.555848	-0.873112	1.41173	-0.00739289	-0.421925	1.98197	-0.133643	-0.196073	-0.179815	1.13244	0.0516304	1.26286	1.25085	-0.366359	1.26295	1.25094	-0.366269	1.26304	1.25103	-0.366179	1.26313	1.25112	-0.366089	1.26322	1.25121	-0.365999	1.26331	1.2513	-0.365909	1.2634	1.25139	-0.365819	1.26349	1.25148	-0.365729	1.26358	1.25157	-0.365639	1.26367	1.25166	-0.365549	1.26376	1.25175	-0.365459	1.26385	1.25184
ENSG00000122406	RPL5	1.13587	-1.16515	0.186654	0.732922	-0.115905	0.512098	1.03517	-2.22646	-2.66134	-0.19661	0.573537	-0.170146	-0.260177	-0.244824	-2.81581	0.402396	-0.244734	-2.81572	0.402486	-0.244644	-2.81563	0.402576	-0.244554	-2.81554	0.402666	-0.244464	-2.81545	0.402756	-0.244374	-2.81536	0.402846	-0.244284	-2.81527	0.402936	-0.244194	-2.81518	0.403026	-0.244104	-2.81509	0.403116	-0.244014	-2.815	0.403206	-0.243924	-2.81491	0.403296	-0.243834	-2.81482
ENSG00000154511	DIPK1A	0.628541	0.871543	2.01703	1.04116	-1.66148	0.0280833	0.212272	0.710805	0.406606	-0.204855	1.22205	-0.28069	-1.06028	-1.1846	-2.07985	0.0469555	-1.18451	-2.07976	0.0470455	-1.18442	-2.07967	0.0471355	-1.18433	-2.07958	0.0472255	-1.18424	-2.07949	0.0473155	-1.18415	-2.0794	0.0474055	-1.18406	-2.07931	0.0474955	-1.18397	-2.07922	0.0475855	-1.18388	-2.07913	0.0476755	-1.18379	-2.07904	0.0477655	-1.1837	-2.07895	0.0478555	-1.18361	-2.07886
ENSG00000117500	TMED5	-0.945557	-1.59946	-0.381372	-0.337197	0.229468	0.879545	-0.895942	2.61558	1.19144	1.3203	-0.102317	-1.10525	1.17451	1.2596	-0.313368	-0.106818	1.25969	-0.313278	-0.106728	1.25978	-0.313188	-0.106638	1.25987	-0.313098	-0.106548	1.25996	-0.313008	-0.106458	1.26005	-0.312918	-0.106368	1.26014	-0.312828	-0.106278	1.26023	-0.312738	-0.106188	1.26032	-0.312648	-0.106098	1.26041	-0.312558	-0.106008	1.2605	-0.312468	-0.105918	1.26059	-0.312378
ENSG00000223745	NA	1.21298	0.302371	-1.12883	-1.72715	-0.263094	-0.581542	-1.24441	-1.46911	0.306541	-0.729766	0.932193	1.40545	-1.65513	-2.07748	-0.227604	-0.421222	-2.07739	-0.227514	-0.421132	-2.0773	-0.227424	-0.421042	-2.07721	-0.227334	-0.420952	-2.07712	-0.227244	-0.420862	-2.07703	-0.227154	-0.420772	-2.07694	-0.227064	-0.420682	-2.07685	-0.226974	-0.420592	-2.07676	-0.226884	-0.420502	-2.07667	-0.226794	-0.420412	-2.07658	-0.226704	-0.420322	-2.07649	-0.226614
ENSG00000137942	FNBP1L	-1.63419	0.284611	0.33187	0.155281	-1.26161	-1.42317	-0.515391	-0.463464	1.3668	2.01397	0.677878	0.954707	0.444026	1.25078	1.87494	1.55196	1.25087	1.87503	1.55205	1.25096	1.87512	1.55214	1.25105	1.87521	1.55223	1.25114	1.8753	1.55232	1.25123	1.87539	1.55241	1.25132	1.87548	1.5525	1.25141	1.87557	1.55259	1.2515	1.87566	1.55268	1.25159	1.87575	1.55277	1.25168	1.87584	1.55286	1.25177	1.87593
ENSG00000137936	BCAR3	-0.266942	0.468824	1.8036	-1.54673	1.29373	0.582328	0.137032	-1.75981	-0.951233	-0.0577088	-1.25311	0.794515	0.999269	-0.63824	0.335904	0.35078	-0.63815	0.335994	0.35087	-0.63806	0.336084	0.35096	-0.63797	0.336174	0.35105	-0.63788	0.336264	0.35114	-0.63779	0.336354	0.35123	-0.6377	0.336444	0.35132	-0.63761	0.336534	0.35141	-0.63752	0.336624	0.3515	-0.63743	0.336714	0.35159	-0.63734	0.336804	0.35168	-0.63725	0.336894
ENSG00000067334	DNTTIP2	-0.144606	-0.169981	0.258708	1.34545	0.706593	2.33923	1.10566	-0.516367	-0.132934	0.613961	-0.266211	0.529538	1.24888	1.39015	-1.31688	-0.395855	1.39024	-1.31679	-0.395765	1.39033	-1.3167	-0.395675	1.39042	-1.31661	-0.395585	1.39051	-1.31652	-0.395495	1.3906	-1.31643	-0.395405	1.39069	-1.31634	-0.395315	1.39078	-1.31625	-0.395225	1.39087	-1.31616	-0.395135	1.39096	-1.31607	-0.395045	1.39105	-1.31598	-0.394955	1.39114	-1.31589
ENSG00000023909	GCLM	0.448955	1.46103	-0.0513509	-0.577918	-1.49609	0.549841	0.203005	0.819846	-1.11426	0.781191	1.72477	-1.5777	-0.284077	1.62279	-1.61011	0.969501	1.62288	-1.61002	0.969591	1.62297	-1.60993	0.969681	1.62306	-1.60984	0.969771	1.62315	-1.60975	0.969861	1.62324	-1.60966	0.969951	1.62333	-1.60957	0.970041	1.62342	-1.60948	0.970131	1.62351	-1.60939	0.970221	1.6236	-1.6093	0.970311	1.62369	-1.60921	0.970401	1.62378	-1.60912
ENSG00000137962	ARHGAP29	-0.902993	-1.76635	-1.51588	-0.616659	1.37709	-0.853779	-1.23324	2.47917	0.188681	1.21524	-0.0603653	0.322963	0.0952777	-0.679717	1.41261	0.492876	-0.679627	1.4127	0.492966	-0.679537	1.41279	0.493056	-0.679447	1.41288	0.493146	-0.679357	1.41297	0.493236	-0.679267	1.41306	0.493326	-0.679177	1.41315	0.493416	-0.679087	1.41324	0.493506	-0.678997	1.41333	0.493596	-0.678907	1.41342	0.493686	-0.678817	1.41351	0.493776	-0.678727	1.4136
ENSG00000117528	ABCD3	-0.357068	-1.59459	-0.361628	-1.29306	-1.43473	-0.121334	-0.104436	0.623021	0.194954	1.36749	0.936191	-2.64898	0.352275	-0.707524	-1.81207	0.889018	-0.707434	-1.81198	0.889108	-0.707344	-1.81189	0.889198	-0.707254	-1.8118	0.889288	-0.707164	-1.81171	0.889378	-0.707074	-1.81162	0.889468	-0.706984	-1.81153	0.889558	-0.706894	-1.81144	0.889648	-0.706804	-1.81135	0.889738	-0.706714	-1.81126	0.889828	-0.706624	-1.81117	0.889918	-0.706534	-1.81108
ENSG00000117525	F3	-0.390212	-0.878895	1.036	1.32249	1.1539	0.952164	-0.0702788	0.342295	-0.2036	1.3454	-0.972064	1.1003	1.35122	1.76431	1.06833	0.371752	1.7644	1.06842	0.371842	1.76449	1.06851	0.371932	1.76458	1.0686	0.372022	1.76467	1.06869	0.372112	1.76476	1.06878	0.372202	1.76485	1.06887	0.372292	1.76494	1.06896	0.372382	1.76503	1.06905	0.372472	1.76512	1.06914	0.372562	1.76521	1.06923	0.372652	1.7653	1.06932
ENSG00000117519	CNN3	0.946727	-0.863789	0.129108	1.2712	-1.18633	0.666618	-0.84576	-1.47272	-1.00965	-1.89392	1.12546	-1.40136	-1.21549	-0.396906	-0.931884	-1.25683	-0.396816	-0.931794	-1.25674	-0.396726	-0.931704	-1.25665	-0.396636	-0.931614	-1.25656	-0.396546	-0.931524	-1.25647	-0.396456	-0.931434	-1.25638	-0.396366	-0.931344	-1.25629	-0.396276	-0.931254	-1.2562	-0.396186	-0.931164	-1.25611	-0.396096	-0.931074	-1.25602	-0.396006	-0.930984	-1.25593	-0.395916	-0.930894
ENSG00000172339	ALG14	0.747595	-1.28783	2.30265	-0.280055	0.267905	2.52123	0.905257	0.766171	0.0251527	0.762308	1.16158	-0.744451	1.02179	1.21673	0.332061	0.488529	1.21682	0.332151	0.488619	1.21691	0.332241	0.488709	1.217	0.332331	0.488799	1.21709	0.332421	0.488889	1.21718	0.332511	0.488979	1.21727	0.332601	0.489069	1.21736	0.332691	0.489159	1.21745	0.332781	0.489249	1.21754	0.332871	0.489339	1.21763	0.332961	0.489429	1.21772	0.333051
ENSG00000152078	TLCD4	-2.2679	-0.780171	0.614015	-0.242763	-0.0026225	0.0341482	0.292698	-0.481473	0.254101	1.37368	0.534178	1.93401	1.57602	1.58527	1.63543	0.807595	1.58536	1.63552	0.807685	1.58545	1.63561	0.807775	1.58554	1.6357	0.807865	1.58563	1.63579	0.807955	1.58572	1.63588	0.808045	1.58581	1.63597	0.808135	1.5859	1.63606	0.808225	1.58599	1.63615	0.808315	1.58608	1.63624	0.808405	1.58617	1.63633	0.808495	1.58626	1.63642
ENSG00000122481	RWDD3	0.574169	-0.139665	-1.07114	-0.522374	0.139217	0.262945	0.80928	-1.08996	-0.492628	-2.34933	0.974006	-0.559228	0.500285	-0.243403	-0.424075	0.783094	-0.243313	-0.423985	0.783184	-0.243223	-0.423895	0.783274	-0.243133	-0.423805	0.783364	-0.243043	-0.423715	0.783454	-0.242953	-0.423625	0.783544	-0.242863	-0.423535	0.783634	-0.242773	-0.423445	0.783724	-0.242683	-0.423355	0.783814	-0.242593	-0.423265	0.783904	-0.242503	-0.423175	0.783994	-0.242413	-0.423085
ENSG00000137970	RPL7P9	0.219467	-2.4354	-0.508059	0.692171	0.434201	1.64925	0.163	-2.3366	-1.02207	0.518599	0.927648	1.5293	-0.413065	-0.319517	-1.39474	-0.83857	-0.319427	-1.39465	-0.83848	-0.319337	-1.39456	-0.83839	-0.319247	-1.39447	-0.8383	-0.319157	-1.39438	-0.83821	-0.319067	-1.39429	-0.83812	-0.318977	-1.3942	-0.83803	-0.318887	-1.39411	-0.83794	-0.318797	-1.39402	-0.83785	-0.318707	-1.39393	-0.83776	-0.318617	-1.39384	-0.83767	-0.318527	-1.39375
ENSG00000117569	PTBP2	-0.00997367	-0.497048	-1.02714	1.71178	-0.335218	-0.348329	-1.16851	0.648247	0.297153	0.0386069	-0.308653	-0.0295478	-1.08672	-0.0698609	-0.485868	-0.270576	-0.0697709	-0.485778	-0.270486	-0.0696809	-0.485688	-0.270396	-0.0695909	-0.485598	-0.270306	-0.0695009	-0.485508	-0.270216	-0.0694109	-0.485418	-0.270126	-0.0693209	-0.485328	-0.270036	-0.0692309	-0.485238	-0.269946	-0.0691409	-0.485148	-0.269856	-0.0690509	-0.485058	-0.269766	-0.0689609	-0.484968	-0.269676	-0.0688709	-0.484878
ENSG00000188641	DPYD	-1.08868	-1.9729	-1.68646	-2.29232	-0.174003	-0.765577	-0.869074	2.4727	1.59496	0.694512	-0.299271	-0.886442	1.15828	-0.251524	0.720155	-0.0814765	-0.251434	0.720245	-0.0813865	-0.251344	0.720335	-0.0812965	-0.251254	0.720425	-0.0812065	-0.251164	0.720515	-0.0811165	-0.251074	0.720605	-0.0810265	-0.250984	0.720695	-0.0809365	-0.250894	0.720785	-0.0808465	-0.250804	0.720875	-0.0807565	-0.250714	0.720965	-0.0806665	-0.250624	0.721055	-0.0805765	-0.250534	0.721145
ENSG00000162627	SNX7	-0.370733	0.949907	1.63806	1.05483	1.78038	0.356814	0.447842	-0.798561	1.38863	0.531809	-0.273155	0.708518	1.64468	-0.196165	1.23523	0.0657456	-0.196075	1.23532	0.0658356	-0.195985	1.23541	0.0659256	-0.195895	1.2355	0.0660156	-0.195805	1.23559	0.0661056	-0.195715	1.23568	0.0661956	-0.195625	1.23577	0.0662856	-0.195535	1.23586	0.0663756	-0.195445	1.23595	0.0664656	-0.195355	1.23604	0.0665556	-0.195265	1.23613	0.0666456	-0.195175	1.23622
ENSG00000156869	FRRS1	-1.95999	-0.887495	0.570331	0.633729	-0.564802	-0.684211	-0.770299	1.89305	1.74642	0.687576	1.93216	0.601749	-0.394614	0.649406	1.15793	-0.564673	0.649496	1.15802	-0.564583	0.649586	1.15811	-0.564493	0.649676	1.1582	-0.564403	0.649766	1.15829	-0.564313	0.649856	1.15838	-0.564223	0.649946	1.15847	-0.564133	0.650036	1.15856	-0.564043	0.650126	1.15865	-0.563953	0.650216	1.15874	-0.563863	0.650306	1.15883	-0.563773	0.650396	1.15892
ENSG00000162688	AGL	-0.924692	-1.53163	-0.105678	-0.277079	-0.497342	0.251107	0.0558874	-1.2941	-1.29764	1.71336	0.79278	0.17954	-1.21405	-2.02655	-2.68622	1.69128	-2.02646	-2.68613	1.69137	-2.02637	-2.68604	1.69146	-2.02628	-2.68595	1.69155	-2.02619	-2.68586	1.69164	-2.0261	-2.68577	1.69173	-2.02601	-2.68568	1.69182	-2.02592	-2.68559	1.69191	-2.02583	-2.6855	1.692	-2.02574	-2.68541	1.69209	-2.02565	-2.68532	1.69218	-2.02556	-2.68523
ENSG00000156875	MFSD14A	-0.676531	1.40519	0.361283	1.62505	0.9925	0.986302	1.42054	-0.354372	-0.067452	-0.763864	-0.968694	0.672845	1.43956	0.496111	-1.71844	-0.189286	0.496201	-1.71835	-0.189196	0.496291	-1.71826	-0.189106	0.496381	-1.71817	-0.189016	0.496471	-1.71808	-0.188926	0.496561	-1.71799	-0.188836	0.496651	-1.7179	-0.188746	0.496741	-1.71781	-0.188656	0.496831	-1.71772	-0.188566	0.496921	-1.71763	-0.188476	0.497011	-1.71754	-0.188386	0.497101	-1.71745
ENSG00000156876	SASS6	1.82365	-1.17718	0.672657	0.125405	-0.783564	1.31207	0.449183	1.11778	-0.19535	1.65702	0.772687	-0.46125	-0.771636	-0.0900967	-1.25767	2.46438	-0.0900067	-1.25758	2.46447	-0.0899167	-1.25749	2.46456	-0.0898267	-1.2574	2.46465	-0.0897367	-1.25731	2.46474	-0.0896467	-1.25722	2.46483	-0.0895567	-1.25713	2.46492	-0.0894667	-1.25704	2.46501	-0.0893767	-1.25695	2.4651	-0.0892867	-1.25686	2.46519	-0.0891967	-1.25677	2.46528	-0.0891067	-1.25668
ENSG00000122435	TRMT13	0.977421	0.481326	0.277744	-0.794944	-1.12939	-0.801612	-0.87534	-0.398812	-0.700792	-0.771088	1.10074	-1.41487	-1.86942	-2.35964	-1.45291	0.454682	-2.35955	-1.45282	0.454772	-2.35946	-1.45273	0.454862	-2.35937	-1.45264	0.454952	-2.35928	-1.45255	0.455042	-2.35919	-1.45246	0.455132	-2.3591	-1.45237	0.455222	-2.35901	-1.45228	0.455312	-2.35892	-1.45219	0.455402	-2.35883	-1.4521	0.455492	-2.35874	-1.45201	0.455582	-2.35865	-1.45192
ENSG00000137992	DBT	0.668831	1.19374	0.813089	-0.955647	-1.17735	-0.985062	-0.225541	-0.0339627	0.571258	-1.02635	1.27586	-1.736	-2.68607	-2.23042	-0.593528	-0.337195	-2.23033	-0.593438	-0.337105	-2.23024	-0.593348	-0.337015	-2.23015	-0.593258	-0.336925	-2.23006	-0.593168	-0.336835	-2.22997	-0.593078	-0.336745	-2.22988	-0.592988	-0.336655	-2.22979	-0.592898	-0.336565	-2.2297	-0.592808	-0.336475	-2.22961	-0.592718	-0.336385	-2.22952	-0.592628	-0.336295	-2.22943	-0.592538
ENSG00000224616	NA	-0.262805	-2.46348	0.46063	0.22042	-0.444935	-0.43009	-0.986164	-0.674109	1.07407	0.410555	1.57854	-0.66972	-1.25507	1.46997	2.13313	1.03081	1.47006	2.13322	1.0309	1.47015	2.13331	1.03099	1.47024	2.1334	1.03108	1.47033	2.13349	1.03117	1.47042	2.13358	1.03126	1.47051	2.13367	1.03135	1.4706	2.13376	1.03144	1.47069	2.13385	1.03153	1.47078	2.13394	1.03162	1.47087	2.13403	1.03171	1.47096	2.13412
ENSG00000137996	RTCA	-0.10017	1.76465	1.12672	0.962852	-0.102756	0.975927	0.401382	1.61422	0.100033	1.23121	1.15755	-0.968435	0.918314	0.231185	-1.68393	0.341039	0.231275	-1.68384	0.341129	0.231365	-1.68375	0.341219	0.231455	-1.68366	0.341309	0.231545	-1.68357	0.341399	0.231635	-1.68348	0.341489	0.231725	-1.68339	0.341579	0.231815	-1.6833	0.341669	0.231905	-1.68321	0.341759	0.231995	-1.68312	0.341849	0.232085	-1.68303	0.341939	0.232175	-1.68294
ENSG00000079335	CDC14A	-0.190988	0.400011	0.106565	1.36809	-0.800753	-1.46039	-0.537144	-1.94882	-1.25251	-0.741456	0.429699	-0.0974821	-0.848166	-1.41923	-2.2901	0.0612397	-1.41914	-2.29001	0.0613297	-1.41905	-2.28992	0.0614197	-1.41896	-2.28983	0.0615097	-1.41887	-2.28974	0.0615997	-1.41878	-2.28965	0.0616897	-1.41869	-2.28956	0.0617797	-1.4186	-2.28947	0.0618697	-1.41851	-2.28938	0.0619597	-1.41842	-2.28929	0.0620497	-1.41833	-2.2892	0.0621397	-1.41824	-2.28911
ENSG00000234332	NA	-0.0880604	0.278105	1.92253	0.178618	-0.88793	0.5926	-0.315911	-1.08074	0.00238999	-0.201048	1.03233	0.610466	0.64916	-1.39868	-1.80843	0.352002	-1.39859	-1.80834	0.352092	-1.3985	-1.80825	0.352182	-1.39841	-1.80816	0.352272	-1.39832	-1.80807	0.352362	-1.39823	-1.80798	0.352452	-1.39814	-1.80789	0.352542	-1.39805	-1.8078	0.352632	-1.39796	-1.80771	0.352722	-1.39787	-1.80762	0.352812	-1.39778	-1.80753	0.352902	-1.39769	-1.80744
ENSG00000162694	EXTL2	0.789377	1.31938	0.217143	-0.600638	0.638034	0.524869	0.993911	-0.403401	-0.288694	1.09332	1.01008	-0.818274	1.06717	-1.80745	-2.82275	0.800833	-1.80736	-2.82266	0.800923	-1.80727	-2.82257	0.801013	-1.80718	-2.82248	0.801103	-1.80709	-2.82239	0.801193	-1.807	-2.8223	0.801283	-1.80691	-2.82221	0.801373	-1.80682	-2.82212	0.801463	-1.80673	-2.82203	0.801553	-1.80664	-2.82194	0.801643	-1.80655	-2.82185	0.801733	-1.80646	-2.82176
ENSG00000162695	SLC30A7	-0.683747	-0.688018	-0.569124	-0.48326	-0.514159	-1.38632	-1.62124	2.07245	-1.05295	-0.216307	0.456343	-2.06362	-0.27099	-1.13469	-1.78397	-0.724143	-1.1346	-1.78388	-0.724053	-1.13451	-1.78379	-0.723963	-1.13442	-1.7837	-0.723873	-1.13433	-1.78361	-0.723783	-1.13424	-1.78352	-0.723693	-1.13415	-1.78343	-0.723603	-1.13406	-1.78334	-0.723513	-1.13397	-1.78325	-0.723423	-1.13388	-1.78316	-0.723333	-1.13379	-1.78307	-0.723243	-1.1337	-1.78298
ENSG00000233184	LOC102606465	1.13657	0.96163	0.656011	0.508835	-1.05	-0.688209	0.125193	-0.676966	-0.504848	-0.0382805	0.889689	0.33106	-2.4922	-1.66537	-1.8229	0.619098	-1.66528	-1.82281	0.619188	-1.66519	-1.82272	0.619278	-1.6651	-1.82263	0.619368	-1.66501	-1.82254	0.619458	-1.66492	-1.82245	0.619548	-1.66483	-1.82236	0.619638	-1.66474	-1.82227	0.619728	-1.66465	-1.82218	0.619818	-1.66456	-1.82209	0.619908	-1.66447	-1.822	0.619998	-1.66438	-1.82191
ENSG00000225938	NA	0.547407	0.173759	0.564966	1.12478	-1.74138	0.220721	0.542283	-1.21399	-1.87636	-1.50691	0.486582	-0.749413	-0.837602	-0.468011	-2.46976	0.308956	-0.467921	-2.46967	0.309046	-0.467831	-2.46958	0.309136	-0.467741	-2.46949	0.309226	-0.467651	-2.4694	0.309316	-0.467561	-2.46931	0.309406	-0.467471	-2.46922	0.309496	-0.467381	-2.46913	0.309586	-0.467291	-2.46904	0.309676	-0.467201	-2.46895	0.309766	-0.467111	-2.46886	0.309856	-0.467021	-2.46877
ENSG00000170989	S1PR1	0.132179	0.0327166	-0.144775	0.691502	-1.18728	-1.3173	-0.581351	-2.19807	-1.48289	-0.897482	0.375144	-0.17282	-1.51356	-1.15966	-2.24392	0.127612	-1.15957	-2.24383	0.127702	-1.15948	-2.24374	0.127792	-1.15939	-2.24365	0.127882	-1.1593	-2.24356	0.127972	-1.15921	-2.24347	0.128062	-1.15912	-2.24338	0.128152	-1.15903	-2.24329	0.128242	-1.15894	-2.2432	0.128332	-1.15885	-2.24311	0.128422	-1.15876	-2.24302	0.128512	-1.15867	-2.24293
ENSG00000185946	RNPC3	1.3247	-0.490755	0.398926	0.614992	-0.900051	0.171649	-0.188372	-0.230132	-1.33914	-0.459077	1.31186	1.32021	-1.41954	-2.74344	-2.54616	0.471791	-2.74335	-2.54607	0.471881	-2.74326	-2.54598	0.471971	-2.74317	-2.54589	0.472061	-2.74308	-2.5458	0.472151	-2.74299	-2.54571	0.472241	-2.7429	-2.54562	0.472331	-2.74281	-2.54553	0.472421	-2.74272	-2.54544	0.472511	-2.74263	-2.54535	0.472601	-2.74254	-2.54526	0.472691	-2.74245	-2.54517
ENSG00000240038	AMY2B	-0.295335	-1.31209	0.642417	1.30805	-3.17328	0.395211	-0.142112	-0.0795866	-0.850787	-0.135086	0.532867	1.13149	-0.582987	-1.83372	-2.29513	-0.246352	-1.83363	-2.29504	-0.246262	-1.83354	-2.29495	-0.246172	-1.83345	-2.29486	-0.246082	-1.83336	-2.29477	-0.245992	-1.83327	-2.29468	-0.245902	-1.83318	-2.29459	-0.245812	-1.83309	-2.2945	-0.245722	-1.833	-2.29441	-0.245632	-1.83291	-2.29432	-0.245542	-1.83282	-2.29423	-0.245452	-1.83273	-2.29414
ENSG00000198890	PRMT6	-0.0759541	-0.0455046	-0.549372	-1.09217	-1.7573	-0.573574	-0.609643	1.66094	1.07861	0.371502	0.658846	-1.10116	0.847909	-1.63746	-0.59364	0.749409	-1.63737	-0.59355	0.749499	-1.63728	-0.59346	0.749589	-1.63719	-0.59337	0.749679	-1.6371	-0.59328	0.749769	-1.63701	-0.59319	0.749859	-1.63692	-0.5931	0.749949	-1.63683	-0.59301	0.750039	-1.63674	-0.59292	0.750129	-1.63665	-0.59283	0.750219	-1.63656	-0.59274	0.750309	-1.63647	-0.59265
ENSG00000134215	VAV3	-1.06561	-0.225313	0.115579	-2.62031	0.350689	0.540316	-0.0971596	1.90233	3.1309	-0.568555	-0.340602	0.720422	0.263646	-0.335252	1.16931	-0.642006	-0.335162	1.1694	-0.641916	-0.335072	1.16949	-0.641826	-0.334982	1.16958	-0.641736	-0.334892	1.16967	-0.641646	-0.334802	1.16976	-0.641556	-0.334712	1.16985	-0.641466	-0.334622	1.16994	-0.641376	-0.334532	1.17003	-0.641286	-0.334442	1.17012	-0.641196	-0.334352	1.17021	-0.641106	-0.334262	1.1703
ENSG00000226822	NA	-0.97775	-0.18982	-1.1737	-1.64078	0.436333	-1.0481	0.0113097	0.259008	0.941526	1.78264	0.0152533	-1.92153	0.655241	1.04432	0.282906	1.07107	1.04441	0.282996	1.07116	1.0445	0.283086	1.07125	1.04459	0.283176	1.07134	1.04468	0.283266	1.07143	1.04477	0.283356	1.07152	1.04486	0.283446	1.07161	1.04495	0.283536	1.0717	1.04504	0.283626	1.07179	1.04513	0.283716	1.07188	1.04522	0.283806	1.07197	1.04531	0.283896
ENSG00000085491	SLC25A24	-0.805786	-1.0572	-0.555555	-3.24937	0.108293	0.0756199	0.575904	2.19348	1.17688	1.13164	0.200828	-1.14945	0.890765	1.22675	0.106525	-0.211657	1.22684	0.106615	-0.211567	1.22693	0.106705	-0.211477	1.22702	0.106795	-0.211387	1.22711	0.106885	-0.211297	1.2272	0.106975	-0.211207	1.22729	0.107065	-0.211117	1.22738	0.107155	-0.211027	1.22747	0.107245	-0.210937	1.22756	0.107335	-0.210847	1.22765	0.107425	-0.210757	1.22774	0.107515
ENSG00000162636	FAM102B	-1.77788	-2.3463	-0.240931	0.900638	0.422222	-0.54781	0.388123	0.419601	-1.36966	-0.0602235	-0.81844	-0.551493	0.543907	-0.292411	-1.04242	-1.03715	-0.292321	-1.04233	-1.03706	-0.292231	-1.04224	-1.03697	-0.292141	-1.04215	-1.03688	-0.292051	-1.04206	-1.03679	-0.291961	-1.04197	-1.0367	-0.291871	-1.04188	-1.03661	-0.291781	-1.04179	-1.03652	-0.291691	-1.0417	-1.03643	-0.291601	-1.04161	-1.03634	-0.291511	-1.04152	-1.03625	-0.291421	-1.04143
ENSG00000162639	HENMT1	1.09364	-0.621052	-0.0481113	-1.39576	0.15753	1.04769	1.60346	-0.939292	-0.845092	0.412367	0.431697	-1.27001	-0.0781808	-1.97082	-3.01585	0.852411	-1.97073	-3.01576	0.852501	-1.97064	-3.01567	0.852591	-1.97055	-3.01558	0.852681	-1.97046	-3.01549	0.852771	-1.97037	-3.0154	0.852861	-1.97028	-3.01531	0.852951	-1.97019	-3.01522	0.853041	-1.9701	-3.01513	0.853131	-1.97001	-3.01504	0.853221	-1.96992	-3.01495	0.853311	-1.96983	-3.01486
ENSG00000134186	PRPF38B	1.27591	0.430494	0.664472	0.257192	-0.668693	-0.415508	0.025585	-2.00144	-1.25709	-0.690678	0.958435	-0.434561	-1.59391	-1.15272	-3.07563	0.234033	-1.15263	-3.07554	0.234123	-1.15254	-3.07545	0.234213	-1.15245	-3.07536	0.234303	-1.15236	-3.07527	0.234393	-1.15227	-3.07518	0.234483	-1.15218	-3.07509	0.234573	-1.15209	-3.075	0.234663	-1.152	-3.07491	0.234753	-1.15191	-3.07482	0.234843	-1.15182	-3.07473	0.234933	-1.15173	-3.07464
ENSG00000116266	STXBP3	-0.130145	-0.48948	-0.338119	-1.99429	-1.38082	-1.1005	-0.844305	1.2118	0.558287	1.17846	0.781528	-2.2324	-0.830722	-0.323824	-1.51241	-0.10415	-0.323734	-1.51232	-0.10406	-0.323644	-1.51223	-0.10397	-0.323554	-1.51214	-0.10388	-0.323464	-1.51205	-0.10379	-0.323374	-1.51196	-0.1037	-0.323284	-1.51187	-0.10361	-0.323194	-1.51178	-0.10352	-0.323104	-1.51169	-0.10343	-0.323014	-1.5116	-0.10334	-0.322924	-1.51151	-0.10325	-0.322834	-1.51142
ENSG00000228076	NA	-1.80747	-2.13714	0.398326	0.921063	0.0482719	0.340023	0.41786	0.869651	-1.63593	-0.268891	-0.567474	0.0466488	0.136232	-0.242932	-0.47314	-0.73136	-0.242842	-0.47305	-0.73127	-0.242752	-0.47296	-0.73118	-0.242662	-0.47287	-0.73109	-0.242572	-0.47278	-0.731	-0.242482	-0.47269	-0.73091	-0.242392	-0.4726	-0.73082	-0.242302	-0.47251	-0.73073	-0.242212	-0.47242	-0.73064	-0.242122	-0.47233	-0.73055	-0.242032	-0.47224	-0.73046	-0.241942	-0.47215
ENSG00000121957	GPSM2	0.314778	-1.33569	1.04464	0.316283	1.59219	1.91817	1.38084	1.01383	-0.0900344	0.477931	1.00617	-1.73564	1.32305	1.49146	0.0951495	0.337283	1.49155	0.0952395	0.337373	1.49164	0.0953295	0.337463	1.49173	0.0954195	0.337553	1.49182	0.0955095	0.337643	1.49191	0.0955995	0.337733	1.492	0.0956895	0.337823	1.49209	0.0957795	0.337913	1.49218	0.0958695	0.338003	1.49227	0.0959595	0.338093	1.49236	0.0960495	0.338183	1.49245	0.0961395
ENSG00000121940	CLCC1	-0.941861	-1.69254	3.01918	-0.12459	0.706677	1.44491	0.0166173	1.1964	-0.556324	-0.714552	1.25435	-1.40113	0.62881	-0.0776447	-2.39845	-0.565688	-0.0775547	-2.39836	-0.565598	-0.0774647	-2.39827	-0.565508	-0.0773747	-2.39818	-0.565418	-0.0772847	-2.39809	-0.565328	-0.0771947	-2.398	-0.565238	-0.0771047	-2.39791	-0.565148	-0.0770147	-2.39782	-0.565058	-0.0769247	-2.39773	-0.564968	-0.0768347	-2.39764	-0.564878	-0.0767447	-2.39755	-0.564788	-0.0766547	-2.39746
ENSG00000085433	WDR47	-1.28184	-1.58584	-0.765878	0.95369	0.232552	-0.501008	-0.1451	0.0841989	-0.297507	-0.60332	-0.540297	-1.05227	-1.25683	-1.35863	-1.0343	-1.24852	-1.35854	-1.03421	-1.24843	-1.35845	-1.03412	-1.24834	-1.35836	-1.03403	-1.24825	-1.35827	-1.03394	-1.24816	-1.35818	-1.03385	-1.24807	-1.35809	-1.03376	-1.24798	-1.358	-1.03367	-1.24789	-1.35791	-1.03358	-1.2478	-1.35782	-1.03349	-1.24771	-1.35773	-1.0334	-1.24762	-1.35764	-1.03331
ENSG00000197780	TAF13	0.479822	0.376039	-0.0630746	1.05782	0.627511	0.571608	-0.0460554	0.644947	0.0333452	0.547985	-0.14666	-0.894092	0.981601	0.291462	-0.246607	-0.0366401	0.291552	-0.246517	-0.0365501	0.291642	-0.246427	-0.0364601	0.291732	-0.246337	-0.0363701	0.291822	-0.246247	-0.0362801	0.291912	-0.246157	-0.0361901	0.292002	-0.246067	-0.0361001	0.292092	-0.245977	-0.0360101	0.292182	-0.245887	-0.0359201	0.292272	-0.245797	-0.0358301	0.292362	-0.245707	-0.0357401	0.292452	-0.245617
ENSG00000273382	NA	-1.62979	-1.16423	0.290103	-0.192451	0.316099	-1.18225	-0.157622	-1.28541	1.3346	-1.30833	0.642751	-0.258689	0.241605	-0.340333	-0.525203	-2.142	-0.340243	-0.525113	-2.14191	-0.340153	-0.525023	-2.14182	-0.340063	-0.524933	-2.14173	-0.339973	-0.524843	-2.14164	-0.339883	-0.524753	-2.14155	-0.339793	-0.524663	-2.14146	-0.339703	-0.524573	-2.14137	-0.339613	-0.524483	-2.14128	-0.339523	-0.524393	-2.14119	-0.339433	-0.524303	-2.1411	-0.339343	-0.524213
ENSG00000215717	TMEM167B	-0.541061	-1.47283	-1.67831	-1.8016	0.222551	0.149566	-0.173596	0.171657	-0.945665	0.0474806	-0.47495	-1.15188	0.242388	-0.67075	-1.59278	-1.08595	-0.67066	-1.59269	-1.08586	-0.67057	-1.5926	-1.08577	-0.67048	-1.59251	-1.08568	-0.67039	-1.59242	-1.08559	-0.6703	-1.59233	-1.0855	-0.67021	-1.59224	-1.08541	-0.67012	-1.59215	-1.08532	-0.67003	-1.59206	-1.08523	-0.66994	-1.59197	-1.08514	-0.66985	-1.59188	-1.08505	-0.66976	-1.59179
ENSG00000116299	ELAPOR1	-0.252847	-0.152578	0.537277	1.24292	0.422968	-0.70067	0.772284	-3.46553	-0.979986	-0.170532	0.876882	-0.105316	-0.881586	-0.524287	-2.33212	0.707365	-0.524197	-2.33203	0.707455	-0.524107	-2.33194	0.707545	-0.524017	-2.33185	0.707635	-0.523927	-2.33176	0.707725	-0.523837	-2.33167	0.707815	-0.523747	-2.33158	0.707905	-0.523657	-2.33149	0.707995	-0.523567	-2.3314	0.708085	-0.523477	-2.33131	0.708175	-0.523387	-2.33122	0.708265	-0.523297	-2.33113
ENSG00000143126	CELSR2	-0.292398	-1.12817	0.277745	0.877558	0.298973	-1.16274	0.709247	-0.299765	-3.83449	0.566415	-0.156366	-0.675771	-0.431579	-0.692731	0.251033	-1.80788	-0.692641	0.251123	-1.80779	-0.692551	0.251213	-1.8077	-0.692461	0.251303	-1.80761	-0.692371	0.251393	-1.80752	-0.692281	0.251483	-1.80743	-0.692191	0.251573	-1.80734	-0.692101	0.251663	-1.80725	-0.692011	0.251753	-1.80716	-0.691921	0.251843	-1.80707	-0.691831	0.251933	-1.80698	-0.691741	0.252023
ENSG00000134222	PSRC1	-0.516292	-0.38668	-0.776934	-0.91069	0.114554	-1.01539	-1.38509	0.506745	1.95512	0.723084	-0.475374	-0.716386	1.38221	0.461206	1.86413	-0.136029	0.461296	1.86422	-0.135939	0.461386	1.86431	-0.135849	0.461476	1.8644	-0.135759	0.461566	1.86449	-0.135669	0.461656	1.86458	-0.135579	0.461746	1.86467	-0.135489	0.461836	1.86476	-0.135399	0.461926	1.86485	-0.135309	0.462016	1.86494	-0.135219	0.462106	1.86503	-0.135129	0.462196	1.86512
ENSG00000134243	SORT1	-1.70685	-2.08882	-1.37323	-2.44764	0.495009	-0.444524	-0.083506	2.0411	1.0163	0.852864	-0.992019	-0.182229	1.32932	0.448518	1.03243	-0.342217	0.448608	1.03252	-0.342127	0.448698	1.03261	-0.342037	0.448788	1.0327	-0.341947	0.448878	1.03279	-0.341857	0.448968	1.03288	-0.341767	0.449058	1.03297	-0.341677	0.449148	1.03306	-0.341587	0.449238	1.03315	-0.341497	0.449328	1.03324	-0.341407	0.449418	1.03333	-0.341317	0.449508	1.03342
ENSG00000143106	PSMA5	1.65147	1.67815	0.965479	-0.626053	-0.167501	1.69097	0.781176	1.10588	0.779615	1.02763	1.13037	-1.23947	0.410929	1.02617	-0.98355	0.7036	1.02626	-0.98346	0.70369	1.02635	-0.98337	0.70378	1.02644	-0.98328	0.70387	1.02653	-0.98319	0.70396	1.02662	-0.9831	0.70405	1.02671	-0.98301	0.70414	1.0268	-0.98292	0.70423	1.02689	-0.98283	0.70432	1.02698	-0.98274	0.70441	1.02707	-0.98265	0.7045	1.02716	-0.98256
ENSG00000162650	ATXN7L2	0.532811	-0.158345	0.166182	2.69479	0.446346	0.783955	0.241431	-1.66949	-0.621526	-0.36458	0.738566	0.450236	-0.156813	-2.14249	-2.79152	-0.148745	-2.1424	-2.79143	-0.148655	-2.14231	-2.79134	-0.148565	-2.14222	-2.79125	-0.148475	-2.14213	-2.79116	-0.148385	-2.14204	-2.79107	-0.148295	-2.14195	-2.79098	-0.148205	-2.14186	-2.79089	-0.148115	-2.14177	-2.7908	-0.148025	-2.14168	-2.79071	-0.147935	-2.14159	-2.79062	-0.147845	-2.1415	-2.79053
ENSG00000174151	CYB561D1	-0.987593	-1.50845	-0.209165	-0.997377	-1.27913	-0.884868	0.239767	-0.0169361	-1.45425	-0.249061	0.0468253	-0.828364	-0.518787	-1.76641	-0.950198	0.703412	-1.76632	-0.950108	0.703502	-1.76623	-0.950018	0.703592	-1.76614	-0.949928	0.703682	-1.76605	-0.949838	0.703772	-1.76596	-0.949748	0.703862	-1.76587	-0.949658	0.703952	-1.76578	-0.949568	0.704042	-1.76569	-0.949478	0.704132	-1.7656	-0.949388	0.704222	-1.76551	-0.949298	0.704312	-1.76542	-0.949208
ENSG00000181754	AMIGO1	0.354121	-0.228879	0.155877	-0.133014	-1.13763	-0.611953	-0.0692146	-2.09088	-1.69563	-1.52767	1.03527	-0.385867	-1.1984	-1.81168	-1.80735	-0.248259	-1.81159	-1.80726	-0.248169	-1.8115	-1.80717	-0.248079	-1.81141	-1.80708	-0.247989	-1.81132	-1.80699	-0.247899	-1.81123	-1.8069	-0.247809	-1.81114	-1.80681	-0.247719	-1.81105	-1.80672	-0.247629	-1.81096	-1.80663	-0.247539	-1.81087	-1.80654	-0.247449	-1.81078	-1.80645	-0.247359	-1.81069	-1.80636
ENSG00000116337	AMPD2	-2.04664	-2.6837	-1.3559	-0.319781	1.81925	-0.143268	0.305391	-0.377016	-0.563627	-0.690151	-1.27123	0.603297	1.15271	-0.0773089	0.334415	-0.522374	-0.0772189	0.334505	-0.522284	-0.0771289	0.334595	-0.522194	-0.0770389	0.334685	-0.522104	-0.0769489	0.334775	-0.522014	-0.0768589	0.334865	-0.521924	-0.0767689	0.334955	-0.521834	-0.0766789	0.335045	-0.521744	-0.0765889	0.335135	-0.521654	-0.0764989	0.335225	-0.521564	-0.0764089	0.335315	-0.521474	-0.0763189	0.335405
ENSG00000168765	GSTM4	1.1824	0.0318881	1.07267	0.550584	0.910734	-0.481376	0.558686	0.498337	0.77993	-0.0334506	1.0156	0.507296	-0.897105	0.097224	1.24289	0.31726	0.097314	1.24298	0.31735	0.097404	1.24307	0.31744	0.097494	1.24316	0.31753	0.097584	1.24325	0.31762	0.097674	1.24334	0.31771	0.097764	1.24343	0.3178	0.097854	1.24352	0.31789	0.097944	1.24361	0.31798	0.098034	1.2437	0.31807	0.098124	1.24379	0.31816	0.098214	1.24388
ENSG00000213366	GSTM2	0.528235	-0.796776	1.50795	0.594398	-1.34509	0.770227	-0.449665	-1.21182	-0.119419	-1.60034	1.0268	0.79947	-0.761003	0.186225	-0.592173	-0.8852	0.186315	-0.592083	-0.88511	0.186405	-0.591993	-0.88502	0.186495	-0.591903	-0.88493	0.186585	-0.591813	-0.88484	0.186675	-0.591723	-0.88475	0.186765	-0.591633	-0.88466	0.186855	-0.591543	-0.88457	0.186945	-0.591453	-0.88448	0.187035	-0.591363	-0.88439	0.187125	-0.591273	-0.8843	0.187215	-0.591183
ENSG00000134184	GSTM1	0.983599	-0.879449	0.962521	-0.9228	0.983173	0.942112	-0.892312	1.19158	1.2184	-0.896994	1.08114	0.887395	-0.869952	0.893585	1.14688	-0.95275	0.893675	1.14697	-0.95266	0.893765	1.14706	-0.95257	0.893855	1.14715	-0.95248	0.893945	1.14724	-0.95239	0.894035	1.14733	-0.9523	0.894125	1.14742	-0.95221	0.894215	1.14751	-0.95212	0.894305	1.1476	-0.95203	0.894395	1.14769	-0.95194	0.894485	1.14778	-0.95185	0.894575	1.14787
ENSG00000134202	GSTM3	0.859078	0.535285	0.704264	0.743925	-0.420635	0.559518	-0.563673	-0.339132	-1.57018	-1.00867	0.213901	0.0858349	-0.397614	-0.202156	-1.30087	-0.213861	-0.202066	-1.30078	-0.213771	-0.201976	-1.30069	-0.213681	-0.201886	-1.3006	-0.213591	-0.201796	-1.30051	-0.213501	-0.201706	-1.30042	-0.213411	-0.201616	-1.30033	-0.213321	-0.201526	-1.30024	-0.213231	-0.201436	-1.30015	-0.213141	-0.201346	-1.30006	-0.213051	-0.201256	-1.29997	-0.212961	-0.201166	-1.29988
ENSG00000184371	CSF1	-0.131074	1.27237	-1.41172	2.80273	1.08526	-0.61077	0.352591	-1.52218	-0.941064	-0.713396	-0.220219	-0.172966	0.9934	2.48826	-1.27849	0.14316	2.48835	-1.2784	0.14325	2.48844	-1.27831	0.14334	2.48853	-1.27822	0.14343	2.48862	-1.27813	0.14352	2.48871	-1.27804	0.14361	2.4888	-1.27795	0.1437	2.48889	-1.27786	0.14379	2.48898	-1.27777	0.14388	2.48907	-1.27768	0.14397	2.48916	-1.27759	0.14406	2.48925	-1.2775
ENSG00000116396	KCNC4	-0.474043	0.306289	0.725689	1.46507	-0.193391	-1.75885	0.266591	-0.672468	-1.14915	-0.126904	0.494594	1.25977	0.464915	0.776625	-1.41032	-0.269471	0.776715	-1.41023	-0.269381	0.776805	-1.41014	-0.269291	0.776895	-1.41005	-0.269201	0.776985	-1.40996	-0.269111	0.777075	-1.40987	-0.269021	0.777165	-1.40978	-0.268931	0.777255	-1.40969	-0.268841	0.777345	-1.4096	-0.268751	0.777435	-1.40951	-0.268661	0.777525	-1.40942	-0.268571	0.777615	-1.40933
ENSG00000162775	RBM15	-2.60732	-1.58569	-0.0830556	1.85563	1.85334	1.60878	1.35913	-0.362663	1.3905	-0.424752	-0.150021	0.182953	-0.519703	-0.903118	0.252978	-1.32435	-0.903028	0.253068	-1.32426	-0.902938	0.253158	-1.32417	-0.902848	0.253248	-1.32408	-0.902758	0.253338	-1.32399	-0.902668	0.253428	-1.3239	-0.902578	0.253518	-1.32381	-0.902488	0.253608	-1.32372	-0.902398	0.253698	-1.32363	-0.902308	0.253788	-1.32354	-0.902218	0.253878	-1.32345	-0.902128	0.253968
ENSG00000224699	NA	0.399682	-1.96614	1.77606	0.421575	1.17149	0.998813	0.912733	0.679264	0.117226	0.868618	-0.116248	0.0101136	-1.3703	-2.03275	1.21609	-0.575455	-2.03266	1.21618	-0.575365	-2.03257	1.21627	-0.575275	-2.03248	1.21636	-0.575185	-2.03239	1.21645	-0.575095	-2.0323	1.21654	-0.575005	-2.03221	1.21663	-0.574915	-2.03212	1.21672	-0.574825	-2.03203	1.21681	-0.574735	-2.03194	1.2169	-0.574645	-2.03185	1.21699	-0.574555	-2.03176	1.21708
ENSG00000134248	LAMTOR5	0.708894	0.364018	0.0288602	-0.451152	1.54889	1.32072	0.519941	1.07452	0.462841	1.62705	0.623237	0.493458	0.937144	2.31994	0.251002	0.457538	2.32003	0.251092	0.457628	2.32012	0.251182	0.457718	2.32021	0.251272	0.457808	2.3203	0.251362	0.457898	2.32039	0.251452	0.457988	2.32048	0.251542	0.458078	2.32057	0.251632	0.458168	2.32066	0.251722	0.458258	2.32075	0.251812	0.458348	2.32084	0.251902	0.458438	2.32093	0.251992
ENSG00000259834	NA	1.22787	0.916464	0.590211	0.393858	-2.0505	-0.898395	-0.252682	-1.13373	0.00969062	1.05435	0.728277	-1.69033	-0.961069	-0.379589	-2.18346	1.13307	-0.379499	-2.18337	1.13316	-0.379409	-2.18328	1.13325	-0.379319	-2.18319	1.13334	-0.379229	-2.1831	1.13343	-0.379139	-2.18301	1.13352	-0.379049	-2.18292	1.13361	-0.378959	-2.18283	1.1337	-0.378869	-2.18274	1.13379	-0.378779	-2.18265	1.13388	-0.378689	-2.18256	1.13397	-0.378599	-2.18247
ENSG00000177272	KCNA3	-0.659667	1.12332	0.879141	1.02694	-1.3835	-0.753609	-0.042536	-2.48623	-0.815403	-0.924039	0.325831	0.141522	-1.05298	-0.188946	-1.65859	0.407992	-0.188856	-1.6585	0.408082	-0.188766	-1.65841	0.408172	-0.188676	-1.65832	0.408262	-0.188586	-1.65823	0.408352	-0.188496	-1.65814	0.408442	-0.188406	-1.65805	0.408532	-0.188316	-1.65796	0.408622	-0.188226	-1.65787	0.408712	-0.188136	-1.65778	0.408802	-0.188046	-1.65769	0.408892	-0.187956	-1.6576
ENSG00000143119	CD53	0.63419	1.55316	-0.493474	-1.81916	0.303507	0.458392	-0.440615	3.15879	1.45458	0.865207	0.0816776	-0.714378	1.35177	0.746677	-0.469731	0.151338	0.746767	-0.469641	0.151428	0.746857	-0.469551	0.151518	0.746947	-0.469461	0.151608	0.747037	-0.469371	0.151698	0.747127	-0.469281	0.151788	0.747217	-0.469191	0.151878	0.747307	-0.469101	0.151968	0.747397	-0.469011	0.152058	0.747487	-0.468921	0.152148	0.747577	-0.468831	0.152238	0.747667	-0.468741
ENSG00000121931	LRIF1	0.729632	0.230668	0.472997	-0.798225	-0.416984	-0.18323	0.309193	-0.56103	-1.30406	0.00252174	1.24045	-1.45003	-1.37141	-1.16209	-3.38316	0.378141	-1.162	-3.38307	0.378231	-1.16191	-3.38298	0.378321	-1.16182	-3.38289	0.378411	-1.16173	-3.3828	0.378501	-1.16164	-3.38271	0.378591	-1.16155	-3.38262	0.378681	-1.16146	-3.38253	0.378771	-1.16137	-3.38244	0.378861	-1.16128	-3.38235	0.378951	-1.16119	-3.38226	0.379041	-1.1611	-3.38217
ENSG00000134255	CEPT1	-0.413588	0.441662	0.0434035	-3.23082	-0.785416	-0.738991	-0.143714	1.53008	0.530269	0.204498	1.54667	-0.560769	-1.64509	-1.64556	-0.763766	0.100372	-1.64547	-0.763676	0.100462	-1.64538	-0.763586	0.100552	-1.64529	-0.763496	0.100642	-1.6452	-0.763406	0.100732	-1.64511	-0.763316	0.100822	-1.64502	-0.763226	0.100912	-1.64493	-0.763136	0.101002	-1.64484	-0.763046	0.101092	-1.64475	-0.762956	0.101182	-1.64466	-0.762866	0.101272	-1.64457	-0.762776
ENSG00000162777	DENND2D	0.783606	1.03412	-0.387013	-0.495608	-1.02297	-0.229168	0.236703	-1.46585	-0.387546	-1.31674	0.877442	-0.888477	-1.53854	-2.4572	-2.18521	0.135673	-2.45711	-2.18512	0.135763	-2.45702	-2.18503	0.135853	-2.45693	-2.18494	0.135943	-2.45684	-2.18485	0.136033	-2.45675	-2.18476	0.136123	-2.45666	-2.18467	0.136213	-2.45657	-2.18458	0.136303	-2.45648	-2.18449	0.136393	-2.45639	-2.1844	0.136483	-2.4563	-2.18431	0.136573	-2.45621	-2.18422
ENSG00000064886	CHI3L2	-0.519619	0.924742	-0.0172685	-1.75462	0.403833	-0.488709	2.15108	-1.49601	-0.520914	0.0446595	1.07438	-0.473958	-1.37417	0.339224	-1.99655	0.373114	0.339314	-1.99646	0.373204	0.339404	-1.99637	0.373294	0.339494	-1.99628	0.373384	0.339584	-1.99619	0.373474	0.339674	-1.9961	0.373564	0.339764	-1.99601	0.373654	0.339854	-1.99592	0.373744	0.339944	-1.99583	0.373834	0.340034	-1.99574	0.373924	0.340124	-1.99565	0.374014	0.340214	-1.99556
ENSG00000085465	OVGP1	0.591966	-1.27689	0.272803	0.970121	-0.247242	-1.39661	-0.674701	-3.59351	-0.460777	-0.46973	0.305394	0.98674	-1.46189	1.15556	-0.866316	0.144031	1.15565	-0.866226	0.144121	1.15574	-0.866136	0.144211	1.15583	-0.866046	0.144301	1.15592	-0.865956	0.144391	1.15601	-0.865866	0.144481	1.1561	-0.865776	0.144571	1.15619	-0.865686	0.144661	1.15628	-0.865596	0.144751	1.15637	-0.865506	0.144841	1.15646	-0.865416	0.144931	1.15655	-0.865326
ENSG00000116459	ATP5PB	0.590474	-0.551021	0.23988	-1.14123	0.712228	1.23681	0.58769	1.4242	-0.467743	1.55852	0.99544	-0.620957	1.44573	2.09295	-1.34176	0.72496	2.09304	-1.34167	0.72505	2.09313	-1.34158	0.72514	2.09322	-1.34149	0.72523	2.09331	-1.3414	0.72532	2.0934	-1.34131	0.72541	2.09349	-1.34122	0.7255	2.09358	-1.34113	0.72559	2.09367	-1.34104	0.72568	2.09376	-1.34095	0.72577	2.09385	-1.34086	0.72586	2.09394	-1.34077
ENSG00000143110	C1orf162	0.729322	0.10817	-0.447822	-2.98145	0.309299	-1.0294	-0.771307	2.72599	1.35978	-0.0663736	0.0835251	-0.430138	0.720654	0.472236	0.894687	-0.152838	0.472326	0.894777	-0.152748	0.472416	0.894867	-0.152658	0.472506	0.894957	-0.152568	0.472596	0.895047	-0.152478	0.472686	0.895137	-0.152388	0.472776	0.895227	-0.152298	0.472866	0.895317	-0.152208	0.472956	0.895407	-0.152118	0.473046	0.895497	-0.152028	0.473136	0.895587	-0.151938	0.473226	0.895677
ENSG00000197852	INKA2	-1.76222	-1.63435	-0.585188	-1.39701	0.697053	-2.42175	-1.11038	1.28784	1.159	0.702518	-0.0414039	0.439198	0.547883	0.375995	2.13959	0.434543	0.376085	2.13968	0.434633	0.376175	2.13977	0.434723	0.376265	2.13986	0.434813	0.376355	2.13995	0.434903	0.376445	2.14004	0.434993	0.376535	2.14013	0.435083	0.376625	2.14022	0.435173	0.376715	2.14031	0.435263	0.376805	2.1404	0.435353	0.376895	2.14049	0.435443	0.376985	2.14058
ENSG00000064703	DDX20	-0.14356	-0.610366	0.160319	0.998029	-0.537003	-0.143214	0.407043	-0.747158	-0.988499	-1.18945	-0.317406	-0.50132	-1.73714	-1.49181	-2.73242	-1.07663	-1.49172	-2.73233	-1.07654	-1.49163	-2.73224	-1.07645	-1.49154	-2.73215	-1.07636	-1.49145	-2.73206	-1.07627	-1.49136	-2.73197	-1.07618	-1.49127	-2.73188	-1.07609	-1.49118	-2.73179	-1.076	-1.49109	-2.7317	-1.07591	-1.491	-2.73161	-1.07582	-1.49091	-2.73152	-1.07573	-1.49082	-2.73143
ENSG00000143079	CTTNBP2NL	-0.258653	-1.29286	-0.427206	-1.19929	-0.791322	-1.07245	0.665471	2.25765	0.851603	-0.0856267	0.100789	-1.07408	0.319279	-1.14254	0.601257	0.000742668	-1.14245	0.601347	0.000832668	-1.14236	0.601437	0.000922668	-1.14227	0.601527	0.00101267	-1.14218	0.601617	0.00110267	-1.14209	0.601707	0.00119267	-1.142	0.601797	0.00128267	-1.14191	0.601887	0.00137267	-1.14182	0.601977	0.00146267	-1.14173	0.602067	0.00155267	-1.14164	0.602157	0.00164267	-1.14155	0.602247
ENSG00000116489	CAPZA1	-2.15672	0.512197	-0.0681595	-0.709111	0.396573	1.28949	0.0141013	2.20879	1.37361	1.02796	1.51912	0.179217	1.52757	-0.113712	-0.210501	0.196773	-0.113622	-0.210411	0.196863	-0.113532	-0.210321	0.196953	-0.113442	-0.210231	0.197043	-0.113352	-0.210141	0.197133	-0.113262	-0.210051	0.197223	-0.113172	-0.209961	0.197313	-0.113082	-0.209871	0.197403	-0.112992	-0.209781	0.197493	-0.112902	-0.209691	0.197583	-0.112812	-0.209601	0.197673	-0.112722	-0.209511
ENSG00000235299	MRPL53P1	-0.460324	0.610114	-0.615754	1.29902	-0.130921	-0.603712	-0.082651	-0.655328	-0.952445	0.278732	-0.825967	-0.414922	-0.636136	-0.621363	0.909674	-0.950535	-0.621273	0.909764	-0.950445	-0.621183	0.909854	-0.950355	-0.621093	0.909944	-0.950265	-0.621003	0.910034	-0.950175	-0.620913	0.910124	-0.950085	-0.620823	0.910214	-0.949995	-0.620733	0.910304	-0.949905	-0.620643	0.910394	-0.949815	-0.620553	0.910484	-0.949725	-0.620463	0.910574	-0.949635	-0.620373	0.910664
ENSG00000155363	MOV10	-0.0725858	3.54029	-0.0295219	-0.614136	-0.677233	0.0606881	-0.391535	0.577865	2.31294	-0.451059	0.543551	-0.123334	-0.65535	-2.51297	-0.553959	0.0404634	-2.51288	-0.553869	0.0405534	-2.51279	-0.553779	0.0406434	-2.5127	-0.553689	0.0407334	-2.51261	-0.553599	0.0408234	-2.51252	-0.553509	0.0409134	-2.51243	-0.553419	0.0410034	-2.51234	-0.553329	0.0410934	-2.51225	-0.553239	0.0411834	-2.51216	-0.553149	0.0412734	-2.51207	-0.553059	0.0413634	-2.51198	-0.552969
ENSG00000155366	RHOC	-0.920891	-0.00548448	-0.143007	-2.07209	2.38894	0.699243	0.993633	0.523003	-0.635774	0.294465	0.737542	0.34259	0.808506	-1.55629	1.51357	0.545164	-1.5562	1.51366	0.545254	-1.55611	1.51375	0.545344	-1.55602	1.51384	0.545434	-1.55593	1.51393	0.545524	-1.55584	1.51402	0.545614	-1.55575	1.51411	0.545704	-1.55566	1.5142	0.545794	-1.55557	1.51429	0.545884	-1.55548	1.51438	0.545974	-1.55539	1.51447	0.546064	-1.5553	1.51456
ENSG00000155367	PPM1J	0.0979977	-0.145162	0.362872	-1.05438	-1.16439	-1.70847	-0.81059	-0.649598	1.69666	-2.37372	-0.416866	0.830752	0.3885	-0.141209	0.163425	-0.834013	-0.141119	0.163515	-0.833923	-0.141029	0.163605	-0.833833	-0.140939	0.163695	-0.833743	-0.140849	0.163785	-0.833653	-0.140759	0.163875	-0.833563	-0.140669	0.163965	-0.833473	-0.140579	0.164055	-0.833383	-0.140489	0.164145	-0.833293	-0.140399	0.164235	-0.833203	-0.140309	0.164325	-0.833113	-0.140219	0.164415
ENSG00000155380	SLC16A1	-0.425829	-0.868219	1.38219	1.44095	-0.887845	1.51449	-0.321299	0.297092	0.39249	2.1163	0.701777	-1.41785	1.63317	0.807662	-0.922566	0.823363	0.807752	-0.922476	0.823453	0.807842	-0.922386	0.823543	0.807932	-0.922296	0.823633	0.808022	-0.922206	0.823723	0.808112	-0.922116	0.823813	0.808202	-0.922026	0.823903	0.808292	-0.921936	0.823993	0.808382	-0.921846	0.824083	0.808472	-0.921756	0.824173	0.808562	-0.921666	0.824263	0.808652	-0.921576
ENSG00000226419	SLC16A1-AS1	0.683938	1.39739	1.96588	0.538193	0.279389	-0.13032	-0.409968	-2.7226	-1.13174	0.210079	0.87015	1.02948	-1.10006	-1.30735	0.486718	0.638752	-1.30726	0.486808	0.638842	-1.30717	0.486898	0.638932	-1.30708	0.486988	0.639022	-1.30699	0.487078	0.639112	-1.3069	0.487168	0.639202	-1.30681	0.487258	0.639292	-1.30672	0.487348	0.639382	-1.30663	0.487438	0.639472	-1.30654	0.487528	0.639562	-1.30645	0.487618	0.639652	-1.30636	0.487708
ENSG00000198799	LRIG2	-1.01892	-0.629253	0.169124	1.64264	-0.434649	-0.177374	-0.294193	-0.858964	-1.00188	-1.21202	-0.305575	-0.278151	-0.944756	-1.17145	-1.98764	-1.03588	-1.17136	-1.98755	-1.03579	-1.17127	-1.98746	-1.0357	-1.17118	-1.98737	-1.03561	-1.17109	-1.98728	-1.03552	-1.171	-1.98719	-1.03543	-1.17091	-1.9871	-1.03534	-1.17082	-1.98701	-1.03525	-1.17073	-1.98692	-1.03516	-1.17064	-1.98683	-1.03507	-1.17055	-1.98674	-1.03498	-1.17046	-1.98665
ENSG00000081026	MAGI3	0.540816	-0.311487	0.491185	1.82254	0.313073	0.665448	-0.1787	-0.923168	-0.959681	-0.549355	1.23509	0.366143	0.237512	-0.489728	-0.396083	-1.07474	-0.489638	-0.395993	-1.07465	-0.489548	-0.395903	-1.07456	-0.489458	-0.395813	-1.07447	-0.489368	-0.395723	-1.07438	-0.489278	-0.395633	-1.07429	-0.489188	-0.395543	-1.0742	-0.489098	-0.395453	-1.07411	-0.489008	-0.395363	-1.07402	-0.488918	-0.395273	-1.07393	-0.488828	-0.395183	-1.07384	-0.488738	-0.395093
ENSG00000081019	RSBN1	1.11678	1.00269	-0.233291	0.191363	-0.445098	-0.247182	0.415906	-2.18803	-1.39711	-0.83039	-0.0975624	0.0834805	-1.65733	0.199629	-3.42067	-0.573913	0.199719	-3.42058	-0.573823	0.199809	-3.42049	-0.573733	0.199899	-3.4204	-0.573643	0.199989	-3.42031	-0.573553	0.200079	-3.42022	-0.573463	0.200169	-3.42013	-0.573373	0.200259	-3.42004	-0.573283	0.200349	-3.41995	-0.573193	0.200439	-3.41986	-0.573103	0.200529	-3.41977	-0.573013	0.200619	-3.41968
ENSG00000231128	NA	0.35587	1.06062	-0.955952	0.929423	-0.542242	1.08211	0.369425	-2.25603	-1.24339	-0.394324	-0.556821	-1.5705	-0.319658	-1.00402	-2.81036	-0.672811	-1.00393	-2.81027	-0.672721	-1.00384	-2.81018	-0.672631	-1.00375	-2.81009	-0.672541	-1.00366	-2.81	-0.672451	-1.00357	-2.80991	-0.672361	-1.00348	-2.80982	-0.672271	-1.00339	-2.80973	-0.672181	-1.0033	-2.80964	-0.672091	-1.00321	-2.80955	-0.672001	-1.00312	-2.80946	-0.671911	-1.00303	-2.80937
ENSG00000134242	PTPN22	0.101383	-0.839522	-0.00167073	0.252879	-0.858438	1.38601	0.344689	-1.91448	0.222715	-0.380876	0.771171	-1.00943	-0.575992	-1.01141	-1.87567	0.182578	-1.01132	-1.87558	0.182668	-1.01123	-1.87549	0.182758	-1.01114	-1.8754	0.182848	-1.01105	-1.87531	0.182938	-1.01096	-1.87522	0.183028	-1.01087	-1.87513	0.183118	-1.01078	-1.87504	0.183208	-1.01069	-1.87495	0.183298	-1.0106	-1.87486	0.183388	-1.01051	-1.87477	0.183478	-1.01042	-1.87468
ENSG00000226167	AP4B1-AS1	-1.06616	-0.247676	0.393924	0.85199	-0.840703	0.489726	-0.353741	-0.357222	0.359604	0.3182	1.07881	0.376385	-0.71606	-1.78132	-0.655673	-0.268642	-1.78123	-0.655583	-0.268552	-1.78114	-0.655493	-0.268462	-1.78105	-0.655403	-0.268372	-1.78096	-0.655313	-0.268282	-1.78087	-0.655223	-0.268192	-1.78078	-0.655133	-0.268102	-1.78069	-0.655043	-0.268012	-1.7806	-0.654953	-0.267922	-1.78051	-0.654863	-0.267832	-1.78042	-0.654773	-0.267742	-1.78033	-0.654683
ENSG00000134262	AP4B1	-0.541484	-0.299923	-0.464582	1.4739	-0.772792	-0.254098	-0.86225	-1.15311	-0.635884	-1.10845	-0.243127	0.179892	-1.19308	-0.647488	-2.39006	-0.824641	-0.647398	-2.38997	-0.824551	-0.647308	-2.38988	-0.824461	-0.647218	-2.38979	-0.824371	-0.647128	-2.3897	-0.824281	-0.647038	-2.38961	-0.824191	-0.646948	-2.38952	-0.824101	-0.646858	-2.38943	-0.824011	-0.646768	-2.38934	-0.823921	-0.646678	-2.38925	-0.823831	-0.646588	-2.38916	-0.823741	-0.646498	-2.38907
ENSG00000118655	DCLRE1B	-0.610422	-0.588507	-0.327956	0.408584	-0.249178	-0.735744	-1.28255	1.85582	-0.336788	-0.723584	0.547226	-3.47362	-0.109604	0.34864	-1.42443	-1.06365	0.34873	-1.42434	-1.06356	0.34882	-1.42425	-1.06347	0.34891	-1.42416	-1.06338	0.349	-1.42407	-1.06329	0.34909	-1.42398	-1.0632	0.34918	-1.42389	-1.06311	0.34927	-1.4238	-1.06302	0.34936	-1.42371	-1.06293	0.34945	-1.42362	-1.06284	0.34954	-1.42353	-1.06275	0.34963	-1.42344
ENSG00000235527	HIPK1-AS1	0.682867	0.513607	-0.223804	0.00464771	-0.126266	0.502025	0.262841	-0.764785	-1.41859	-1.36248	-0.642835	-2.42086	-0.474065	-0.36611	-1.10484	-0.695971	-0.36602	-1.10475	-0.695881	-0.36593	-1.10466	-0.695791	-0.36584	-1.10457	-0.695701	-0.36575	-1.10448	-0.695611	-0.36566	-1.10439	-0.695521	-0.36557	-1.1043	-0.695431	-0.36548	-1.10421	-0.695341	-0.36539	-1.10412	-0.695251	-0.3653	-1.10403	-0.695161	-0.36521	-1.10394	-0.695071	-0.36512	-1.10385
ENSG00000163349	HIPK1	-1.42216	-1.92549	-1.30303	0.864415	-1.02189	-0.879981	0.00331567	0.779179	-0.615427	0.00222277	-0.965338	-1.15792	0.165936	0.788972	-0.579038	-1.06364	0.789062	-0.578948	-1.06355	0.789152	-0.578858	-1.06346	0.789242	-0.578768	-1.06337	0.789332	-0.578678	-1.06328	0.789422	-0.578588	-1.06319	0.789512	-0.578498	-1.0631	0.789602	-0.578408	-1.06301	0.789692	-0.578318	-1.06292	0.789782	-0.578228	-1.06283	0.789872	-0.578138	-1.06274	0.789962	-0.578048
ENSG00000116752	BCAS2	0.341204	0.156532	-0.0236014	1.55965	-0.152518	0.904033	0.153792	-1.02505	-0.785722	-0.0771	-0.328117	-0.82787	-0.409925	-0.845213	-1.80716	-0.659524	-0.845123	-1.80707	-0.659434	-0.845033	-1.80698	-0.659344	-0.844943	-1.80689	-0.659254	-0.844853	-1.8068	-0.659164	-0.844763	-1.80671	-0.659074	-0.844673	-1.80662	-0.658984	-0.844583	-1.80653	-0.658894	-0.844493	-1.80644	-0.658804	-0.844403	-1.80635	-0.658714	-0.844313	-1.80626	-0.658624	-0.844223	-1.80617
ENSG00000175984	DENND2C	-0.376961	-0.69726	0.860059	0.625104	0.315228	-0.796556	-0.772737	0.476995	2.02208	1.33744	-0.49133	-0.305111	-0.351554	0.228331	2.86398	2.0733	0.228421	2.86407	2.07339	0.228511	2.86416	2.07348	0.228601	2.86425	2.07357	0.228691	2.86434	2.07366	0.228781	2.86443	2.07375	0.228871	2.86452	2.07384	0.228961	2.86461	2.07393	0.229051	2.8647	2.07402	0.229141	2.86479	2.07411	0.229231	2.86488	2.0742	0.229321	2.86497
ENSG00000213281	NRAS	-1.18707	-2.17657	-0.143143	0.601232	0.242932	1.23162	0.895515	0.932424	1.61487	1.07798	-0.476522	0.253112	1.01141	0.780436	-1.06562	0.0302087	0.780526	-1.06553	0.0302987	0.780616	-1.06544	0.0303887	0.780706	-1.06535	0.0304787	0.780796	-1.06526	0.0305687	0.780886	-1.06517	0.0306587	0.780976	-1.06508	0.0307487	0.781066	-1.06499	0.0308387	0.781156	-1.0649	0.0309287	0.781246	-1.06481	0.0310187	0.781336	-1.06472	0.0311087	0.781426	-1.06463
ENSG00000052723	SIKE1	0.393458	-0.568928	-0.311912	0.0818882	-1.31973	1.29276	-0.361153	1.02188	-0.169308	-0.821433	0.312002	-1.8809	-0.366127	-2.07932	-2.49108	-0.043394	-2.07923	-2.49099	-0.043304	-2.07914	-2.4909	-0.043214	-2.07905	-2.49081	-0.043124	-2.07896	-2.49072	-0.043034	-2.07887	-2.49063	-0.042944	-2.07878	-2.49054	-0.042854	-2.07869	-2.49045	-0.042764	-2.0786	-2.49036	-0.042674	-2.07851	-2.49027	-0.042584	-2.07842	-2.49018	-0.042494	-2.07833	-2.49009
ENSG00000134198	TSPAN2	0.0680576	0.571259	0.356645	-1.27482	-0.256852	0.845323	0.884817	1.21131	-0.172358	0.726387	0.901049	0.0566825	-0.275888	-2.34282	0.155283	0.600786	-2.34273	0.155373	0.600876	-2.34264	0.155463	0.600966	-2.34255	0.155553	0.601056	-2.34246	0.155643	0.601146	-2.34237	0.155733	0.601236	-2.34228	0.155823	0.601326	-2.34219	0.155913	0.601416	-2.3421	0.156003	0.601506	-2.34201	0.156093	0.601596	-2.34192	0.156183	0.601686	-2.34183	0.156273
ENSG00000173218	VANGL1	-0.497581	0.732423	0.984729	0.915749	0.966329	1.60398	1.24435	1.08464	1.44141	1.27474	0.711592	-0.317177	0.848533	-0.141722	0.233355	0.926804	-0.141632	0.233445	0.926894	-0.141542	0.233535	0.926984	-0.141452	0.233625	0.927074	-0.141362	0.233715	0.927164	-0.141272	0.233805	0.927254	-0.141182	0.233895	0.927344	-0.141092	0.233985	0.927434	-0.141002	0.234075	0.927524	-0.140912	0.234165	0.927614	-0.140822	0.234255	0.927704	-0.140732	0.234345
ENSG00000163393	SLC22A15	-0.472229	-1.62019	-1.4403	-2.30591	-0.281744	-0.836338	-0.599587	2.96157	1.21751	0.89146	-0.0601084	-1.48464	0.744318	0.237277	0.528875	0.46469	0.237367	0.528965	0.46478	0.237457	0.529055	0.46487	0.237547	0.529145	0.46496	0.237637	0.529235	0.46505	0.237727	0.529325	0.46514	0.237817	0.529415	0.46523	0.237907	0.529505	0.46532	0.237997	0.529595	0.46541	0.238087	0.529685	0.4655	0.238177	0.529775	0.46559	0.238267	0.529865
ENSG00000163399	ATP1A1	-1.80319	-0.510854	-1.6068	1.35537	1.06909	-0.487943	0.108432	-0.618211	-1.29813	-1.03812	-0.215614	0.525744	0.682721	0.517943	-1.14561	-1.10734	0.518033	-1.14552	-1.10725	0.518123	-1.14543	-1.10716	0.518213	-1.14534	-1.10707	0.518303	-1.14525	-1.10698	0.518393	-1.14516	-1.10689	0.518483	-1.14507	-1.1068	0.518573	-1.14498	-1.10671	0.518663	-1.14489	-1.10662	0.518753	-1.1448	-1.10653	0.518843	-1.14471	-1.10644	0.518933	-1.14462
ENSG00000203865	ATP1A1-AS1	0.898591	1.23237	-0.849286	0.92506	-0.871179	-1.27355	0.465534	-0.64478	-0.413507	-1.44311	0.523508	-1.05637	-1.58572	-1.37101	0.0383599	-0.455032	-1.37092	0.0384499	-0.454942	-1.37083	0.0385399	-0.454852	-1.37074	0.0386299	-0.454762	-1.37065	0.0387199	-0.454672	-1.37056	0.0388099	-0.454582	-1.37047	0.0388999	-0.454492	-1.37038	0.0389899	-0.454402	-1.37029	0.0390799	-0.454312	-1.3702	0.0391699	-0.454222	-1.37011	0.0392599	-0.454132	-1.37002	0.0393499
ENSG00000116815	CD58	0.121474	0.203384	-1.03738	-1.60316	0.139643	0.452837	-0.648787	1.9502	1.4992	2.20602	0.155274	-0.488903	0.842531	1.74966	0.0925385	0.724604	1.74975	0.0926285	0.724694	1.74984	0.0927185	0.724784	1.74993	0.0928085	0.724874	1.75002	0.0928985	0.724964	1.75011	0.0929885	0.725054	1.7502	0.0930785	0.725144	1.75029	0.0931685	0.725234	1.75038	0.0932585	0.725324	1.75047	0.0933485	0.725414	1.75056	0.0934385	0.725504	1.75065	0.0935285
ENSG00000177173	NA	-0.784404	-0.846654	0.176825	1.2006	-0.26238	0.898306	-0.389156	-0.818677	0.403321	1.41629	0.0275814	0.127398	0.965088	0.642611	1.18038	0.928701	0.642701	1.18047	0.928791	0.642791	1.18056	0.928881	0.642881	1.18065	0.928971	0.642971	1.18074	0.929061	0.643061	1.18083	0.929151	0.643151	1.18092	0.929241	0.643241	1.18101	0.929331	0.643331	1.1811	0.929421	0.643421	1.18119	0.929511	0.643511	1.18128	0.929601	0.643601	1.18137
ENSG00000116824	CD2	1.69436	1.44994	0.404245	0.065668	-1.04062	0.1664	0.323489	-1.01388	-1.51418	0.302126	0.761533	-1.00027	-0.551921	-1.85159	-3.14841	1.05074	-1.8515	-3.14832	1.05083	-1.85141	-3.14823	1.05092	-1.85132	-3.14814	1.05101	-1.85123	-3.14805	1.0511	-1.85114	-3.14796	1.05119	-1.85105	-3.14787	1.05128	-1.85096	-3.14778	1.05137	-1.85087	-3.14769	1.05146	-1.85078	-3.1476	1.05155	-1.85069	-3.14751	1.05164	-1.8506	-3.14742
ENSG00000225079	FTH1P22	0.628234	0.22006	-0.329478	-0.456161	-0.184268	-0.182307	-0.219521	-0.2098	-1.05557	-1.32553	0.443968	-1.76504	-0.292745	-2.74199	-1.56866	0.217908	-2.7419	-1.56857	0.217998	-2.74181	-1.56848	0.218088	-2.74172	-1.56839	0.218178	-2.74163	-1.5683	0.218268	-2.74154	-1.56821	0.218358	-2.74145	-1.56812	0.218448	-2.74136	-1.56803	0.218538	-2.74127	-1.56794	0.218628	-2.74118	-1.56785	0.218718	-2.74109	-1.56776	0.218808	-2.741	-1.56767
ENSG00000134247	PTGFRN	-1.70748	-2.50701	-0.616399	0.376487	1.08318	-0.662539	-0.55973	1.06648	1.64315	-0.241742	-0.088595	-0.0537471	1.82758	0.922481	1.65065	-0.175756	0.922571	1.65074	-0.175666	0.922661	1.65083	-0.175576	0.922751	1.65092	-0.175486	0.922841	1.65101	-0.175396	0.922931	1.6511	-0.175306	0.923021	1.65119	-0.175216	0.923111	1.65128	-0.175126	0.923201	1.65137	-0.175036	0.923291	1.65146	-0.174946	0.923381	1.65155	-0.174856	0.923471	1.65164
ENSG00000134256	CD101	-0.356052	-1.84568	-0.464482	-2.29462	0.787842	-0.740431	-0.168262	0.484234	1.42134	-1.896	-0.510525	-1.47093	0.932033	-0.838485	-0.200024	-1.5041	-0.838395	-0.199934	-1.50401	-0.838305	-0.199844	-1.50392	-0.838215	-0.199754	-1.50383	-0.838125	-0.199664	-1.50374	-0.838035	-0.199574	-1.50365	-0.837945	-0.199484	-1.50356	-0.837855	-0.199394	-1.50347	-0.837765	-0.199304	-1.50338	-0.837675	-0.199214	-1.50329	-0.837585	-0.199124	-1.5032	-0.837495	-0.199034
ENSG00000183508	TENT5C	-0.336343	0.032745	0.618116	1.30538	-0.0581862	0.0805015	0.366092	-0.8847	-0.246694	0.491957	-0.397414	1.38669	-0.0715276	1.21769	-0.303381	0.800338	1.21778	-0.303291	0.800428	1.21787	-0.303201	0.800518	1.21796	-0.303111	0.800608	1.21805	-0.303021	0.800698	1.21814	-0.302931	0.800788	1.21823	-0.302841	0.800878	1.21832	-0.302751	0.800968	1.21841	-0.302661	0.801058	1.2185	-0.302571	0.801148	1.21859	-0.302481	0.801238	1.21868	-0.302391
ENSG00000065183	WDR3	-1.08204	-0.589398	0.202376	0.17552	-0.757165	-0.365512	-0.000927502	-0.0648218	-2.25041	-0.508117	0.354753	-1.32474	-0.532239	-1.76715	-3.0783	-0.06781	-1.76706	-3.07821	-0.06772	-1.76697	-3.07812	-0.06763	-1.76688	-3.07803	-0.06754	-1.76679	-3.07794	-0.06745	-1.7667	-3.07785	-0.06736	-1.76661	-3.07776	-0.06727	-1.76652	-3.07767	-0.06718	-1.76643	-3.07758	-0.06709	-1.76634	-3.07749	-0.067	-1.76625	-3.0774	-0.06691	-1.76616	-3.07731
ENSG00000116874	WARS2	0.0851696	-0.553796	1.18785	0.814669	-0.645681	-0.592672	-0.0429434	-0.95006	-0.0357483	-1.82936	-0.298621	-0.497993	-0.439487	-2.80726	-1.6331	-1.21117	-2.80717	-1.63301	-1.21108	-2.80708	-1.63292	-1.21099	-2.80699	-1.63283	-1.2109	-2.8069	-1.63274	-1.21081	-2.80681	-1.63265	-1.21072	-2.80672	-1.63256	-1.21063	-2.80663	-1.63247	-1.21054	-2.80654	-1.63238	-1.21045	-2.80645	-1.63229	-1.21036	-2.80636	-1.6322	-1.21027	-2.80627	-1.63211
ENSG00000231365	WARS2-AS1	-0.395034	-1.10826	0.998522	0.559074	-2.30988	-1.46266	-0.230203	-1.05055	0.952806	-0.916406	0.718549	0.405478	-1.25545	-2.54397	-0.660762	0.225994	-2.54388	-0.660672	0.226084	-2.54379	-0.660582	0.226174	-2.5437	-0.660492	0.226264	-2.54361	-0.660402	0.226354	-2.54352	-0.660312	0.226444	-2.54343	-0.660222	0.226534	-2.54334	-0.660132	0.226624	-2.54325	-0.660042	0.226714	-2.54316	-0.659952	0.226804	-2.54307	-0.659862	0.226894	-2.54298	-0.659772
ENSG00000092621	PHGDH	-0.204559	0.16222	0.854422	1.31026	0.00924957	0.614917	0.896692	0.210091	1.06523	1.05744	0.864881	0.62477	1.58858	1.74438	1.02251	0.984865	1.74447	1.0226	0.984955	1.74456	1.02269	0.985045	1.74465	1.02278	0.985135	1.74474	1.02287	0.985225	1.74483	1.02296	0.985315	1.74492	1.02305	0.985405	1.74501	1.02314	0.985495	1.7451	1.02323	0.985585	1.74519	1.02332	0.985675	1.74528	1.02341	0.985765	1.74537	1.0235
ENSG00000134193	REG4	-0.172589	1.31258	0.212518	0.723346	-1.40595	-1.25588	0.0557871	-0.933839	-0.355836	-0.715181	0.57532	-1.46013	1.38572	0.450378	-0.746723	-0.0167094	0.450468	-0.746633	-0.0166194	0.450558	-0.746543	-0.0165294	0.450648	-0.746453	-0.0164394	0.450738	-0.746363	-0.0163494	0.450828	-0.746273	-0.0162594	0.450918	-0.746183	-0.0161694	0.451008	-0.746093	-0.0160794	0.451098	-0.746003	-0.0159894	0.451188	-0.745913	-0.0158994	0.451278	-0.745823	-0.0158094	0.451368	-0.745733
ENSG00000134250	NOTCH2	-2.23681	-2.28064	-1.46558	-1.5023	0.0327901	-1.25414	-0.202589	0.432159	-0.0105002	-0.310591	-1.14753	-0.150805	0.288599	-1.42936	0.708158	-1.1094	-1.42927	0.708248	-1.10931	-1.42918	0.708338	-1.10922	-1.42909	0.708428	-1.10913	-1.429	0.708518	-1.10904	-1.42891	0.708608	-1.10895	-1.42882	0.708698	-1.10886	-1.42873	0.708788	-1.10877	-1.42864	0.708878	-1.10868	-1.42855	0.708968	-1.10859	-1.42846	0.709058	-1.1085	-1.42837	0.709148
ENSG00000265808	SEC22B	-0.415745	-1.11385	0.250078	-0.84321	0.188583	0.149912	-0.478899	2.34197	0.308095	1.48265	-0.304209	-3.18252	-0.160459	-0.0415327	-1.30664	0.811732	-0.0414427	-1.30655	0.811822	-0.0413527	-1.30646	0.811912	-0.0412627	-1.30637	0.812002	-0.0411727	-1.30628	0.812092	-0.0410827	-1.30619	0.812182	-0.0409927	-1.3061	0.812272	-0.0409027	-1.30601	0.812362	-0.0408127	-1.30592	0.812452	-0.0407227	-1.30583	0.812542	-0.0406327	-1.30574	0.812632	-0.0405427	-1.30565
ENSG00000223804	NA	0.556396	0.969707	-0.716851	1.37901	1.65413	-0.482971	0.875914	-1.24184	-0.972262	1.17287	0.0846455	0.127734	-1.65498	-0.0424754	-0.834934	0.435224	-0.0423854	-0.834844	0.435314	-0.0422954	-0.834754	0.435404	-0.0422054	-0.834664	0.435494	-0.0421154	-0.834574	0.435584	-0.0420254	-0.834484	0.435674	-0.0419354	-0.834394	0.435764	-0.0418454	-0.834304	0.435854	-0.0417554	-0.834214	0.435944	-0.0416654	-0.834124	0.436034	-0.0415754	-0.834034	0.436124	-0.0414854	-0.833944
ENSG00000270231	NBPF8	-1.93226	-0.674441	0.171056	0.679098	-2.21823	1.56954	0.499154	-0.823686	0.180492	-0.315159	0.873077	0.81826	0.906822	-0.837512	-0.393211	0.161665	-0.837422	-0.393121	0.161755	-0.837332	-0.393031	0.161845	-0.837242	-0.392941	0.161935	-0.837152	-0.392851	0.162025	-0.837062	-0.392761	0.162115	-0.836972	-0.392671	0.162205	-0.836882	-0.392581	0.162295	-0.836792	-0.392491	0.162385	-0.836702	-0.392401	0.162475	-0.836612	-0.392311	0.162565	-0.836522	-0.392221
ENSG00000275131	NA	-0.25859	-0.260225	0.221475	-0.622319	-1.1269	-0.789261	-0.112963	-1.55656	-1.90675	-0.714489	0.849806	-0.515893	-1.14929	-1.13272	-1.19707	0.703586	-1.13263	-1.19698	0.703676	-1.13254	-1.19689	0.703766	-1.13245	-1.1968	0.703856	-1.13236	-1.19671	0.703946	-1.13227	-1.19662	0.704036	-1.13218	-1.19653	0.704126	-1.13209	-1.19644	0.704216	-1.132	-1.19635	0.704306	-1.13191	-1.19626	0.704396	-1.13182	-1.19617	0.704486	-1.13173	-1.19608
ENSG00000273136	NBPF26	-0.849492	-1.24488	0.128167	-0.101468	-1.00413	-0.760034	1.18842	-1.92429	-0.362481	0.403111	0.0767304	-1.50917	-0.155255	-0.439955	-0.900186	0.457063	-0.439865	-0.900096	0.457153	-0.439775	-0.900006	0.457243	-0.439685	-0.899916	0.457333	-0.439595	-0.899826	0.457423	-0.439505	-0.899736	0.457513	-0.439415	-0.899646	0.457603	-0.439325	-0.899556	0.457693	-0.439235	-0.899466	0.457783	-0.439145	-0.899376	0.457873	-0.439055	-0.899286	0.457963	-0.438965	-0.899196
ENSG00000287979	NA	0.653946	0.657267	0.50701	-0.343596	0.0610421	-1.75024	0.579442	-2.10327	-0.115831	0.446884	-0.166649	-1.6173	0.0620093	0.236373	-1.20876	0.409684	0.236463	-1.20867	0.409774	0.236553	-1.20858	0.409864	0.236643	-1.20849	0.409954	0.236733	-1.2084	0.410044	0.236823	-1.20831	0.410134	0.236913	-1.20822	0.410224	0.237003	-1.20813	0.410314	0.237093	-1.20804	0.410404	0.237183	-1.20795	0.410494	0.237273	-1.20786	0.410584	0.237363	-1.20777
ENSG00000226067	NA	0.909889	0.389865	-0.121429	0.532098	-0.141781	-2.04833	0.943957	-2.43119	-1.11673	0.215913	-0.461258	-1.00876	-0.72317	-0.100018	-2.49202	1.09356	-0.0999279	-2.49193	1.09365	-0.0998379	-2.49184	1.09374	-0.0997479	-2.49175	1.09383	-0.0996579	-2.49166	1.09392	-0.0995679	-2.49157	1.09401	-0.0994779	-2.49148	1.0941	-0.0993879	-2.49139	1.09419	-0.0992979	-2.4913	1.09428	-0.0992079	-2.49121	1.09437	-0.0991179	-2.49112	1.09446	-0.0990279	-2.49103
ENSG00000277610	RNVU1-4	1.3998	0.967928	0.405351	-0.551356	0.897849	0.922021	-0.026126	0.932205	-0.38327	-0.484273	0.852494	0.0269613	-0.413956	0.980992	-0.320004	-0.0239001	0.981082	-0.319914	-0.0238101	0.981172	-0.319824	-0.0237201	0.981262	-0.319734	-0.0236301	0.981352	-0.319644	-0.0235401	0.981442	-0.319554	-0.0234501	0.981532	-0.319464	-0.0233601	0.981622	-0.319374	-0.0232701	0.981712	-0.319284	-0.0231801	0.981802	-0.319194	-0.0230901	0.981892	-0.319104	-0.0230001	0.981982	-0.319014
ENSG00000198019	FCGR1B	-0.0606406	1.1567	0.317769	-1.39299	-0.247727	0.497429	-1.47754	2.0852	1.63327	0.949661	0.641225	-1.53446	0.728926	2.00575	1.16304	0.0577622	2.00584	1.16313	0.0578522	2.00593	1.16322	0.0579422	2.00602	1.16331	0.0580322	2.00611	1.1634	0.0581222	2.0062	1.16349	0.0582122	2.00629	1.16358	0.0583022	2.00638	1.16367	0.0583922	2.00647	1.16376	0.0584822	2.00656	1.16385	0.0585722	2.00665	1.16394	0.0586622	2.00674	1.16403
ENSG00000171943	SRGAP2C	-1.69747	0.466984	-1.67617	-0.979018	-0.04165	-0.000182615	-1.64773	2.29696	1.91929	0.363967	-0.0342619	-0.676919	1.38377	0.741309	1.80645	-0.480981	0.741399	1.80654	-0.480891	0.741489	1.80663	-0.480801	0.741579	1.80672	-0.480711	0.741669	1.80681	-0.480621	0.741759	1.8069	-0.480531	0.741849	1.80699	-0.480441	0.741939	1.80708	-0.480351	0.742029	1.80717	-0.480261	0.742119	1.80726	-0.480171	0.742209	1.80735	-0.480081	0.742299	1.80744
ENSG00000231752	EMBP1	0.986772	-0.554791	0.781095	0.544444	-1.4013	0.251921	1.14745	-1.03734	-2.01927	0.928523	0.997168	0.239463	0.0589589	-0.574833	-2.28092	1.37925	-0.574743	-2.28083	1.37934	-0.574653	-2.28074	1.37943	-0.574563	-2.28065	1.37952	-0.574473	-2.28056	1.37961	-0.574383	-2.28047	1.3797	-0.574293	-2.28038	1.37979	-0.574203	-2.28029	1.37988	-0.574113	-2.2802	1.37997	-0.574023	-2.28011	1.38006	-0.573933	-2.28002	1.38015	-0.573843	-2.27993
ENSG00000265531	FCGR1CP	0.440457	1.27321	-0.295837	-0.928763	-1.14651	0.560358	-0.668865	1.51868	2.27292	0.632353	-0.137792	-0.71517	1.50476	1.89742	1.50799	0.331522	1.89751	1.50808	0.331612	1.8976	1.50817	0.331702	1.89769	1.50826	0.331792	1.89778	1.50835	0.331882	1.89787	1.50844	0.331972	1.89796	1.50853	0.332062	1.89805	1.50862	0.332152	1.89814	1.50871	0.332242	1.89823	1.5088	0.332332	1.89832	1.50889	0.332422	1.89841	1.50898
ENSG00000207205	RNVU1-15	0.928182	0.55796	0.801876	-0.543856	-0.626911	0.909296	0.462104	1.20308	0.035154	-1.00037	-0.633732	-0.240115	0.281485	-0.236664	-1.68809	-0.966317	-0.236574	-1.688	-0.966227	-0.236484	-1.68791	-0.966137	-0.236394	-1.68782	-0.966047	-0.236304	-1.68773	-0.965957	-0.236214	-1.68764	-0.965867	-0.236124	-1.68755	-0.965777	-0.236034	-1.68746	-0.965687	-0.235944	-1.68737	-0.965597	-0.235854	-1.68728	-0.965507	-0.235764	-1.68719	-0.965417	-0.235674	-1.6871
ENSG00000266338	NBPF15	0.163294	-0.657713	0.0367395	-0.361637	-2.22508	-0.60696	0.853886	-1.79356	-1.18352	-1.2367	0.504461	1.5027	-0.737099	-0.477186	-1.5177	-0.520047	-0.477096	-1.51761	-0.519957	-0.477006	-1.51752	-0.519867	-0.476916	-1.51743	-0.519777	-0.476826	-1.51734	-0.519687	-0.476736	-1.51725	-0.519597	-0.476646	-1.51716	-0.519507	-0.476556	-1.51707	-0.519417	-0.476466	-1.51698	-0.519327	-0.476376	-1.51689	-0.519237	-0.476286	-1.5168	-0.519147	-0.476196	-1.51671
ENSG00000196369	SRGAP2B	-1.27688	-0.380656	-0.483716	-0.273118	-3.95984	-0.191937	-0.781897	2.36505	-0.205147	0.31271	0.0134466	0.997049	0.275103	0.348094	-0.220576	0.243581	0.348184	-0.220486	0.243671	0.348274	-0.220396	0.243761	0.348364	-0.220306	0.243851	0.348454	-0.220216	0.243941	0.348544	-0.220126	0.244031	0.348634	-0.220036	0.244121	0.348724	-0.219946	0.244211	0.348814	-0.219856	0.244301	0.348904	-0.219766	0.244391	0.348994	-0.219676	0.244481	0.349084	-0.219586
ENSG00000272419	NA	0.37681	0.432363	0.157472	-0.524612	-0.988167	-2.96958	0.216619	-1.32612	-0.291451	-0.593212	0.0531083	-0.0877839	-0.686764	-1.84641	-1.42	-0.286604	-1.84632	-1.41991	-0.286514	-1.84623	-1.41982	-0.286424	-1.84614	-1.41973	-0.286334	-1.84605	-1.41964	-0.286244	-1.84596	-1.41955	-0.286154	-1.84587	-1.41946	-0.286064	-1.84578	-1.41937	-0.285974	-1.84569	-1.41928	-0.285884	-1.8456	-1.41919	-0.285794	-1.84551	-1.4191	-0.285704	-1.84542	-1.41901
ENSG00000281571	NA	0.073651	0.384333	0.776707	1.26991	-0.0398671	0.360344	0.767165	-2.42945	-0.191058	-2.96394	0.146321	0.208035	0.777363	-0.99404	-1.27116	-0.411135	-0.99395	-1.27107	-0.411045	-0.99386	-1.27098	-0.410955	-0.99377	-1.27089	-0.410865	-0.99368	-1.2708	-0.410775	-0.99359	-1.27071	-0.410685	-0.9935	-1.27062	-0.410595	-0.99341	-1.27053	-0.410505	-0.99332	-1.27044	-0.410415	-0.99323	-1.27035	-0.410325	-0.99314	-1.27026	-0.410235	-0.99305	-1.27017
ENSG00000276216	NA	0.728851	0.463665	0.374594	-1.41459	-1.81653	0.645546	-0.223925	1.48671	0.908248	-0.0472172	0.326547	-0.306899	-1.21201	-0.631585	-0.75576	0.0524779	-0.631495	-0.75567	0.0525679	-0.631405	-0.75558	0.0526579	-0.631315	-0.75549	0.0527479	-0.631225	-0.7554	0.0528379	-0.631135	-0.75531	0.0529279	-0.631045	-0.75522	0.0530179	-0.630955	-0.75513	0.0531079	-0.630865	-0.75504	0.0531979	-0.630775	-0.75495	0.0532879	-0.630685	-0.75486	0.0533779	-0.630595	-0.75477
ENSG00000117262	GPR89A	1.82257	0.265558	1.11339	0.288654	-2.00665	1.49455	1.18779	-0.264915	-1.07453	-0.357462	0.110245	0.335399	-0.553886	-1.33525	-1.66236	0.720521	-1.33516	-1.66227	0.720611	-1.33507	-1.66218	0.720701	-1.33498	-1.66209	0.720791	-1.33489	-1.662	0.720881	-1.3348	-1.66191	0.720971	-1.33471	-1.66182	0.721061	-1.33462	-1.66173	0.721151	-1.33453	-1.66164	0.721241	-1.33444	-1.66155	0.721331	-1.33435	-1.66146	0.721421	-1.33426	-1.66137
ENSG00000117281	CD160	0.460658	1.51878	-0.0979376	-0.369055	0.0783618	1.17601	0.588144	-1.48638	-0.957329	-1.15308	-0.690747	-0.212479	-1.25969	-2.12711	-2.40543	-0.178276	-2.12702	-2.40534	-0.178186	-2.12693	-2.40525	-0.178096	-2.12684	-2.40516	-0.178006	-2.12675	-2.40507	-0.177916	-2.12666	-2.40498	-0.177826	-2.12657	-2.40489	-0.177736	-2.12648	-2.4048	-0.177646	-2.12639	-2.40471	-0.177556	-2.1263	-2.40462	-0.177466	-2.12621	-2.40453	-0.177376	-2.12612	-2.40444
ENSG00000186364	NUDT17	0.224765	0.96084	-0.406542	-0.249418	-1.6721	-0.801301	0.331441	-1.32209	1.46083	-2.13931	0.93141	2.06862	0.859648	-1.15926	-0.15076	-0.120212	-1.15917	-0.15067	-0.120122	-1.15908	-0.15058	-0.120032	-1.15899	-0.15049	-0.119942	-1.1589	-0.1504	-0.119852	-1.15881	-0.15031	-0.119762	-1.15872	-0.15022	-0.119672	-1.15863	-0.15013	-0.119582	-1.15854	-0.15004	-0.119492	-1.15845	-0.14995	-0.119402	-1.15836	-0.14986	-0.119312	-1.15827	-0.14977
ENSG00000198483	ANKRD35	-0.939683	-3.21529	-0.153464	-0.62253	0.671043	-0.28681	-0.440633	-1.33571	0.776094	0.72052	0.711112	0.0562968	-0.817766	0.783019	-0.536463	0.0700211	0.783109	-0.536373	0.0701111	0.783199	-0.536283	0.0702011	0.783289	-0.536193	0.0702911	0.783379	-0.536103	0.0703811	0.783469	-0.536013	0.0704711	0.783559	-0.535923	0.0705611	0.783649	-0.535833	0.0706511	0.783739	-0.535743	0.0707411	0.783829	-0.535653	0.0708311	0.783919	-0.535563	0.0709211	0.784009	-0.535473
ENSG00000131779	PEX11B	0.605554	0.35895	-0.270063	-2.2925	-0.91022	-1.12066	-0.362577	0.702585	0.637551	-0.0479249	1.46367	-1.42912	0.514436	-0.572585	-0.934318	0.364052	-0.572495	-0.934228	0.364142	-0.572405	-0.934138	0.364232	-0.572315	-0.934048	0.364322	-0.572225	-0.933958	0.364412	-0.572135	-0.933868	0.364502	-0.572045	-0.933778	0.364592	-0.571955	-0.933688	0.364682	-0.571865	-0.933598	0.364772	-0.571775	-0.933508	0.364862	-0.571685	-0.933418	0.364952	-0.571595	-0.933328
ENSG00000271601	LIX1L	-0.37162	-0.668241	-0.996587	-0.912141	-0.480208	-0.210771	-0.351851	-0.219962	-2.78791	-0.59061	0.890198	-0.770906	-0.500036	-1.7804	-2.18769	-0.0144801	-1.78031	-2.1876	-0.0143901	-1.78022	-2.18751	-0.0143001	-1.78013	-2.18742	-0.0142101	-1.78004	-2.18733	-0.0141201	-1.77995	-2.18724	-0.0140301	-1.77986	-2.18715	-0.0139401	-1.77977	-2.18706	-0.0138501	-1.77968	-2.18697	-0.0137601	-1.77959	-2.18688	-0.0136701	-1.7795	-2.18679	-0.0135801	-1.77941	-2.1867
ENSG00000265972	TXNIP	1.78417	-0.104622	-0.318036	-2.20667	-2.22503	0.830128	-0.58229	0.231186	0.718391	-0.592389	1.09014	0.196366	-0.899327	-1.79879	-1.29269	-0.292194	-1.7987	-1.2926	-0.292104	-1.79861	-1.29251	-0.292014	-1.79852	-1.29242	-0.291924	-1.79843	-1.29233	-0.291834	-1.79834	-1.29224	-0.291744	-1.79825	-1.29215	-0.291654	-1.79816	-1.29206	-0.291564	-1.79807	-1.29197	-0.291474	-1.79798	-1.29188	-0.291384	-1.79789	-1.29179	-0.291294	-1.7978	-1.2917
ENSG00000287190	NA	1.154	1.06491	1.00663	-1.00866	-0.73482	1.40454	0.118282	1.72814	0.870389	-0.153758	0.725872	-0.333558	-0.365164	-0.637991	-1.08794	-0.243214	-0.637901	-1.08785	-0.243124	-0.637811	-1.08776	-0.243034	-0.637721	-1.08767	-0.242944	-0.637631	-1.08758	-0.242854	-0.637541	-1.08749	-0.242764	-0.637451	-1.0874	-0.242674	-0.637361	-1.08731	-0.242584	-0.637271	-1.08722	-0.242494	-0.637181	-1.08713	-0.242404	-0.637091	-1.08704	-0.242314	-0.637001	-1.08695
ENSG00000271425	NBPF10	-1.39734	-0.794965	-0.152749	-1.25797	1.14342	-1.94559	0.341616	0.410992	-0.14252	-1.82602	-0.849778	1.45871	-2.02851	-0.49981	0.0161995	-0.63618	-0.49972	0.0162895	-0.63609	-0.49963	0.0163795	-0.636	-0.49954	0.0164695	-0.63591	-0.49945	0.0165595	-0.63582	-0.49936	0.0166495	-0.63573	-0.49927	0.0167395	-0.63564	-0.49918	0.0168295	-0.63555	-0.49909	0.0169195	-0.63546	-0.499	0.0170095	-0.63537	-0.49891	0.0170995	-0.63528	-0.49882	0.0171895
ENSG00000277406	NA	0.819212	0.603086	-0.0224139	-1.12534	-0.15225	0.10039	-1.42707	0.428044	0.834944	-0.428633	0.156389	-0.242493	-0.0972888	-0.835071	-1.75836	-0.234832	-0.834981	-1.75827	-0.234742	-0.834891	-1.75818	-0.234652	-0.834801	-1.75809	-0.234562	-0.834711	-1.758	-0.234472	-0.834621	-1.75791	-0.234382	-0.834531	-1.75782	-0.234292	-0.834441	-1.75773	-0.234202	-0.834351	-1.75764	-0.234112	-0.834261	-1.75755	-0.234022	-0.834171	-1.75746	-0.233932	-0.834081	-1.75737
ENSG00000287978	LOC100996756	0.104149	0.0331233	0.457976	-0.445771	-0.222679	-0.360561	0.0955985	0.435838	-1.49441	0.383481	1.05219	0.43172	-1.72411	-3.38111	0.00107215	0.466136	-3.38102	0.00116215	0.466226	-3.38093	0.00125215	0.466316	-3.38084	0.00134215	0.466406	-3.38075	0.00143215	0.466496	-3.38066	0.00152215	0.466586	-3.38057	0.00161215	0.466676	-3.38048	0.00170215	0.466766	-3.38039	0.00179215	0.466856	-3.3803	0.00188215	0.466946	-3.38021	0.00197215	0.467036	-3.38012	0.00206215
ENSG00000274428	NA	1.23556	0.717451	0.358684	-2.68594	-0.750547	0.58988	0.418611	0.401712	0.211928	0.24125	0.32063	0.303231	-0.469493	-0.00979991	-0.821301	0.43641	-0.00970991	-0.821211	0.4365	-0.00961991	-0.821121	0.43659	-0.00952991	-0.821031	0.43668	-0.00943991	-0.820941	0.43677	-0.00934991	-0.820851	0.43686	-0.00925991	-0.820761	0.43695	-0.00916991	-0.820671	0.43704	-0.00907991	-0.820581	0.43713	-0.00898991	-0.820491	0.43722	-0.00889991	-0.820401	0.43731	-0.00880991	-0.820311
ENSG00000268043	NBPF12	-0.49732	-2.51163	0.101312	0.561667	-1.10968	-0.290692	-0.304103	-1.45191	0.289653	-1.72788	-0.283867	0.907968	-0.235542	-1.49904	0.0168876	-0.36473	-1.49895	0.0169776	-0.36464	-1.49886	0.0170676	-0.36455	-1.49877	0.0171576	-0.36446	-1.49868	0.0172476	-0.36437	-1.49859	0.0173376	-0.36428	-1.4985	0.0174276	-0.36419	-1.49841	0.0175176	-0.3641	-1.49832	0.0176076	-0.36401	-1.49823	0.0176976	-0.36392	-1.49814	0.0177876	-0.36383	-1.49805	0.0178776
ENSG00000131791	PRKAB2	-1.76906	-1.41467	-0.473319	-0.150972	-1.10725	-1.37001	-1.53732	0.365851	-0.0958503	0.923788	0.149232	-2.58621	-1.10585	-0.782613	1.44308	0.828083	-0.782523	1.44317	0.828173	-0.782433	1.44326	0.828263	-0.782343	1.44335	0.828353	-0.782253	1.44344	0.828443	-0.782163	1.44353	0.828533	-0.782073	1.44362	0.828623	-0.781983	1.44371	0.828713	-0.781893	1.4438	0.828803	-0.781803	1.44389	0.828893	-0.781713	1.44398	0.828983	-0.781623	1.44407
ENSG00000180867	NA	0.809078	0.193159	0.801593	0.350157	0.477048	-0.0709641	-0.0813971	1.67746	-0.378038	-0.204094	-0.571049	-0.782563	0.813735	-0.536678	-2.03488	-0.193319	-0.536588	-2.03479	-0.193229	-0.536498	-2.0347	-0.193139	-0.536408	-2.03461	-0.193049	-0.536318	-2.03452	-0.192959	-0.536228	-2.03443	-0.192869	-0.536138	-2.03434	-0.192779	-0.536048	-2.03425	-0.192689	-0.535958	-2.03416	-0.192599	-0.535868	-2.03407	-0.192509	-0.535778	-2.03398	-0.192419	-0.535688	-2.03389
ENSG00000131781	FMO5	-1.48009	-2.99776	-1.49942	-1.97818	1.04989	-0.88711	-1.0345	0.200316	-1.28378	0.856342	1.14541	0.2769	0.061027	-0.173027	0.818068	0.592806	-0.172937	0.818158	0.592896	-0.172847	0.818248	0.592986	-0.172757	0.818338	0.593076	-0.172667	0.818428	0.593166	-0.172577	0.818518	0.593256	-0.172487	0.818608	0.593346	-0.172397	0.818698	0.593436	-0.172307	0.818788	0.593526	-0.172217	0.818878	0.593616	-0.172127	0.818968	0.593706	-0.172037	0.819058
ENSG00000226015	CCT8P1	-0.468694	-3.3077	-2.44026	-0.775135	0.899929	-0.507342	-0.146606	0.251624	-1.27123	1.00315	0.943645	-0.483638	0.369724	-1.06951	-0.00312742	-0.433759	-1.06942	-0.00303742	-0.433669	-1.06933	-0.00294742	-0.433579	-1.06924	-0.00285742	-0.433489	-1.06915	-0.00276742	-0.433399	-1.06906	-0.00267742	-0.433309	-1.06897	-0.00258742	-0.433219	-1.06888	-0.00249742	-0.433129	-1.06879	-0.00240742	-0.433039	-1.0687	-0.00231742	-0.432949	-1.06861	-0.00222742	-0.432859	-1.06852	-0.00213742
ENSG00000278811	LINC00624	-0.757635	-2.04844	0.825304	-0.667349	-0.560988	-1.99399	-1.34348	0.497607	0.449809	-0.353398	0.680785	-0.151717	-0.170274	-1.98752	0.840779	-0.477667	-1.98743	0.840869	-0.477577	-1.98734	0.840959	-0.477487	-1.98725	0.841049	-0.477397	-1.98716	0.841139	-0.477307	-1.98707	0.841229	-0.477217	-1.98698	0.841319	-0.477127	-1.98689	0.841409	-0.477037	-1.9868	0.841499	-0.476947	-1.98671	0.841589	-0.476857	-1.98662	0.841679	-0.476767	-1.98653	0.841769
ENSG00000116128	BCL9	0.37821	0.111264	0.0607274	0.702658	0.619137	0.503018	-0.729736	-0.161124	3.26112	-0.0389891	-0.146963	0.771467	-0.0579211	-0.467994	-0.113519	-2.63193	-0.467904	-0.113429	-2.63184	-0.467814	-0.113339	-2.63175	-0.467724	-0.113249	-2.63166	-0.467634	-0.113159	-2.63157	-0.467544	-0.113069	-2.63148	-0.467454	-0.112979	-2.63139	-0.467364	-0.112889	-2.6313	-0.467274	-0.112799	-2.63121	-0.467184	-0.112709	-2.63112	-0.467094	-0.112619	-2.63103	-0.467004	-0.112529
ENSG00000162836	ACP6	0.695492	-0.71156	-1.0214	1.10169	-0.646047	0.65152	0.159125	-0.900016	-0.444309	-1.49011	0.610075	-0.476967	-1.40033	-2.21522	-0.893118	0.287101	-2.21513	-0.893028	0.287191	-2.21504	-0.892938	0.287281	-2.21495	-0.892848	0.287371	-2.21486	-0.892758	0.287461	-2.21477	-0.892668	0.287551	-2.21468	-0.892578	0.287641	-2.21459	-0.892488	0.287731	-2.2145	-0.892398	0.287821	-2.21441	-0.892308	0.287911	-2.21432	-0.892218	0.288001	-2.21423	-0.892128
ENSG00000188092	GPR89B	1.66365	-0.0327583	0.895603	-0.484668	-0.715383	-0.0482552	-0.30123	-0.928875	-1.05149	-0.105392	0.705989	-1.34302	-0.644417	-3.18293	-2.03634	-0.395224	-3.18284	-2.03625	-0.395134	-3.18275	-2.03616	-0.395044	-3.18266	-2.03607	-0.394954	-3.18257	-2.03598	-0.394864	-3.18248	-2.03589	-0.394774	-3.18239	-2.0358	-0.394684	-3.1823	-2.03571	-0.394594	-3.18221	-2.03562	-0.394504	-3.18212	-2.03553	-0.394414	-3.18203	-2.03544	-0.394324	-3.18194	-2.03535
ENSG00000263956	NBPF11	-1.86117	-1.65974	1.37265	-1.05343	-1.03817	0.404438	0.780166	-0.947741	-0.429488	-1.30217	0.734945	1.40536	-1.67147	-1.9146	-0.479235	-0.635378	-1.91451	-0.479145	-0.635288	-1.91442	-0.479055	-0.635198	-1.91433	-0.478965	-0.635108	-1.91424	-0.478875	-0.635018	-1.91415	-0.478785	-0.634928	-1.91406	-0.478695	-0.634838	-1.91397	-0.478605	-0.634748	-1.91388	-0.478515	-0.634658	-1.91379	-0.478425	-0.634568	-1.9137	-0.478335	-0.634478	-1.91361	-0.478245
ENSG00000274020	LINC01138	0.626749	1.56381	0.216806	-0.616158	-0.986397	-0.722365	-0.625385	0.01704	-1.81201	-0.293911	0.14062	-1.08482	-1.23592	-2.18829	-1.77226	0.151359	-2.1882	-1.77217	0.151449	-2.18811	-1.77208	0.151539	-2.18802	-1.77199	0.151629	-2.18793	-1.7719	0.151719	-2.18784	-1.77181	0.151809	-2.18775	-1.77172	0.151899	-2.18766	-1.77163	0.151989	-2.18757	-1.77154	0.152079	-2.18748	-1.77145	0.152169	-2.18739	-1.77136	0.152259	-2.1873	-1.77127
ENSG00000231551	PDE4DIPP6	1.0961	1.21931	-0.0345445	-1.08764	0.0628023	-0.319567	-1.40537	-0.836485	-1.32047	-1.4451	1.41062	-0.413747	-1.21563	-1.13527	-0.641262	-0.729594	-1.13518	-0.641172	-0.729504	-1.13509	-0.641082	-0.729414	-1.135	-0.640992	-0.729324	-1.13491	-0.640902	-0.729234	-1.13482	-0.640812	-0.729144	-1.13473	-0.640722	-0.729054	-1.13464	-0.640632	-0.728964	-1.13455	-0.640542	-0.728874	-1.13446	-0.640452	-0.728784	-1.13437	-0.640362	-0.728694	-1.13428	-0.640272
ENSG00000280649	NA	-0.133495	1.45837	-0.579815	0.50332	-1.63626	0.435973	0.503549	-1.03375	0.596436	-2.51033	0.213837	-0.280361	-1.31352	-1.07394	-1.41638	0.336536	-1.07385	-1.41629	0.336626	-1.07376	-1.4162	0.336716	-1.07367	-1.41611	0.336806	-1.07358	-1.41602	0.336896	-1.07349	-1.41593	0.336986	-1.0734	-1.41584	0.337076	-1.07331	-1.41575	0.337166	-1.07322	-1.41566	0.337256	-1.07313	-1.41557	0.337346	-1.07304	-1.41548	0.337436	-1.07295	-1.41539
ENSG00000274210	NA	1.07532	0.731657	0.358761	-0.924948	-0.0693584	0.582096	0.258887	0.987579	0.0642646	-0.294169	0.3289	-0.534593	-0.961857	-0.375372	-1.44447	-0.0639765	-0.375282	-1.44438	-0.0638865	-0.375192	-1.44429	-0.0637965	-0.375102	-1.4442	-0.0637065	-0.375012	-1.44411	-0.0636165	-0.374922	-1.44402	-0.0635265	-0.374832	-1.44393	-0.0634365	-0.374742	-1.44384	-0.0633465	-0.374652	-1.44375	-0.0632565	-0.374562	-1.44366	-0.0631665	-0.374472	-1.44357	-0.0630765	-0.374382	-1.44348
ENSG00000270629	NBPF14	-0.198861	-1.97851	0.0219156	-1.66947	-1.86125	0.195574	0.276725	1.35483	0.902569	0.460207	-0.544097	1.56246	-0.895957	-2.03643	1.32191	-0.305733	-2.03634	1.322	-0.305643	-2.03625	1.32209	-0.305553	-2.03616	1.32218	-0.305463	-2.03607	1.32227	-0.305373	-2.03598	1.32236	-0.305283	-2.03589	1.32245	-0.305193	-2.0358	1.32254	-0.305103	-2.03571	1.32263	-0.305013	-2.03562	1.32272	-0.304923	-2.03553	1.32281	-0.304833	-2.03544	1.3229
ENSG00000178104	PDE4DIP	-0.938697	-1.39935	0.148654	-1.54898	-1.39497	-0.976821	0.165851	0.226557	-1.02442	0.0271561	-0.0561581	-0.0814793	-0.69223	-0.731609	-2.01131	-0.107639	-0.731519	-2.01122	-0.107549	-0.731429	-2.01113	-0.107459	-0.731339	-2.01104	-0.107369	-0.731249	-2.01095	-0.107279	-0.731159	-2.01086	-0.107189	-0.731069	-2.01077	-0.107099	-0.730979	-2.01068	-0.107009	-0.730889	-2.01059	-0.106919	-0.730799	-2.0105	-0.106829	-0.730709	-2.01041	-0.106739	-0.730619	-2.01032
ENSG00000269713	NBPF9	-0.611595	-1.14178	0.129135	-0.463162	-1.12429	-0.113661	-0.951336	0.270311	-0.135109	-0.759524	0.182687	1.61051	-0.68727	-1.00172	0.142476	-2.20089	-1.00163	0.142566	-2.2008	-1.00154	0.142656	-2.20071	-1.00145	0.142746	-2.20062	-1.00136	0.142836	-2.20053	-1.00127	0.142926	-2.20044	-1.00118	0.143016	-2.20035	-1.00109	0.143106	-2.20026	-1.001	0.143196	-2.20017	-1.00091	0.143286	-2.20008	-1.00082	0.143376	-2.19999	-1.00073	0.143466
ENSG00000274265	NA	2.21142	-0.958637	0.794159	-0.0203566	-0.734252	-1.70021	0.81023	-0.413098	-0.965149	0.206519	-0.33396	-1.22539	-1.08932	-0.559303	-1.45585	0.02001	-0.559213	-1.45576	0.0201	-0.559123	-1.45567	0.02019	-0.559033	-1.45558	0.02028	-0.558943	-1.45549	0.02037	-0.558853	-1.4554	0.02046	-0.558763	-1.45531	0.02055	-0.558673	-1.45522	0.02064	-0.558583	-1.45513	0.02073	-0.558493	-1.45504	0.02082	-0.558403	-1.45495	0.02091	-0.558313	-1.45486
ENSG00000277147	LINC00869	1.77069	0.725062	-0.125897	-0.238577	-0.612672	-0.548846	0.883236	-1.8608	-2.10055	-1.67717	0.555808	-0.438236	-1.07407	-1.763	-1.83427	0.382237	-1.76291	-1.83418	0.382327	-1.76282	-1.83409	0.382417	-1.76273	-1.834	0.382507	-1.76264	-1.83391	0.382597	-1.76255	-1.83382	0.382687	-1.76246	-1.83373	0.382777	-1.76237	-1.83364	0.382867	-1.76228	-1.83355	0.382957	-1.76219	-1.83346	0.383047	-1.7621	-1.83337	0.383137	-1.76201	-1.83328
ENSG00000275557	NA	0.341528	1.20284	0.586372	-0.421265	1.00729	-0.869417	0.52331	-2.50814	0.4456	0.118145	-0.79023	-1.1168	-3.47782	-0.902859	-0.435907	0.408173	-0.902769	-0.435817	0.408263	-0.902679	-0.435727	0.408353	-0.902589	-0.435637	0.408443	-0.902499	-0.435547	0.408533	-0.902409	-0.435457	0.408623	-0.902319	-0.435367	0.408713	-0.902229	-0.435277	0.408803	-0.902139	-0.435187	0.408893	-0.902049	-0.435097	0.408983	-0.901959	-0.435007	0.409073	-0.901869	-0.434917
ENSG00000206828	NA	0.751173	1.38921	0.768403	-0.463185	0.0333589	1.45176	0.551921	1.69148	-0.320599	0.157394	1.16529	-0.979727	-0.464447	-0.128499	-1.49207	0.0889593	-0.128409	-1.49198	0.0890493	-0.128319	-1.49189	0.0891393	-0.128229	-1.4918	0.0892293	-0.128139	-1.49171	0.0893193	-0.128049	-1.49162	0.0894093	-0.127959	-1.49153	0.0894993	-0.127869	-1.49144	0.0895893	-0.127779	-1.49135	0.0896793	-0.127689	-1.49126	0.0897693	-0.127599	-1.49117	0.0898593	-0.127509	-1.49108
ENSG00000150337	FCGR1A	0.122832	1.18342	0.107529	-1.4825	0.473207	0.501337	-0.9984	1.79783	1.74756	1.01587	0.230373	-0.383571	1.32602	2.00951	1.00151	0.489476	2.0096	1.0016	0.489566	2.00969	1.00169	0.489656	2.00978	1.00178	0.489746	2.00987	1.00187	0.489836	2.00996	1.00196	0.489926	2.01005	1.00205	0.490016	2.01014	1.00214	0.490106	2.01023	1.00223	0.490196	2.01032	1.00232	0.490286	2.01041	1.00241	0.490376	2.0105	1.0025
ENSG00000220323	H2BC19P	0.588804	0.341604	-0.171002	-0.087431	1.04199	0.124054	0.0166936	2.63584	0.962009	-0.142535	1.0039	0.465183	0.620416	0.392609	0.70811	1.1654	0.392699	0.7082	1.16549	0.392789	0.70829	1.16558	0.392879	0.70838	1.16567	0.392969	0.70847	1.16576	0.393059	0.70856	1.16585	0.393149	0.70865	1.16594	0.393239	0.70874	1.16603	0.393329	0.70883	1.16612	0.393419	0.70892	1.16621	0.393509	0.70901	1.1663	0.393599	0.7091
ENSG00000261716	H2BC20P	-0.516632	0.359905	0.97861	-0.558743	-0.593135	0.907546	0.658329	2.0561	1.42806	1.03111	1.49662	-0.731784	1.2229	-0.234987	1.09379	-0.505869	-0.234897	1.09388	-0.505779	-0.234807	1.09397	-0.505689	-0.234717	1.09406	-0.505599	-0.234627	1.09415	-0.505509	-0.234537	1.09424	-0.505419	-0.234447	1.09433	-0.505329	-0.234357	1.09442	-0.505239	-0.234267	1.09451	-0.505149	-0.234177	1.0946	-0.505059	-0.234087	1.09469	-0.504969	-0.233997	1.09478
ENSG00000184678	H2BC21	-0.429414	1.26978	1.00779	-0.30595	0.463854	-0.120232	-0.207588	1.04594	1.77731	1.25891	0.711684	0.320898	0.633423	1.33824	2.49091	1.49297	1.33833	2.491	1.49306	1.33842	2.49109	1.49315	1.33851	2.49118	1.49324	1.3386	2.49127	1.49333	1.33869	2.49136	1.49342	1.33878	2.49145	1.49351	1.33887	2.49154	1.4936	1.33896	2.49163	1.49369	1.33905	2.49172	1.49378	1.33914	2.49181	1.49387	1.33923	2.4919
ENSG00000184260	H2AC20	1.0728	1.92837	0.328077	1.19163	1.42632	1.14845	0.115389	-0.678271	1.62144	-0.226464	-0.291923	0.687706	1.35126	1.01036	0.439161	0.749845	1.01045	0.439251	0.749935	1.01054	0.439341	0.750025	1.01063	0.439431	0.750115	1.01072	0.439521	0.750205	1.01081	0.439611	0.750295	1.0109	0.439701	0.750385	1.01099	0.439791	0.750475	1.01108	0.439881	0.750565	1.01117	0.439971	0.750655	1.01126	0.440061	0.750745	1.01135	0.440151
ENSG00000178096	BOLA1	0.865744	1.27483	0.23565	-2.08874	-0.962928	-0.358293	0.398959	0.263543	-0.0719615	-0.611555	1.39775	-0.932365	0.233625	-0.215569	-0.707949	0.733473	-0.215479	-0.707859	0.733563	-0.215389	-0.707769	0.733653	-0.215299	-0.707679	0.733743	-0.215209	-0.707589	0.733833	-0.215119	-0.707499	0.733923	-0.215029	-0.707409	0.734013	-0.214939	-0.707319	0.734103	-0.214849	-0.707229	0.734193	-0.214759	-0.707139	0.734283	-0.214669	-0.707049	0.734373	-0.214579	-0.706959
ENSG00000159164	SV2A	-0.159241	-0.126467	0.398587	1.60712	-0.386792	-0.115576	0.820457	-2.62896	-0.874814	0.186009	-0.0859009	-2.86703	0.550067	-1.53967	-0.977945	-0.0576089	-1.53958	-0.977855	-0.0575189	-1.53949	-0.977765	-0.0574289	-1.5394	-0.977675	-0.0573389	-1.53931	-0.977585	-0.0572489	-1.53922	-0.977495	-0.0571589	-1.53913	-0.977405	-0.0570689	-1.53904	-0.977315	-0.0569789	-1.53895	-0.977225	-0.0568889	-1.53886	-0.977135	-0.0567989	-1.53877	-0.977045	-0.0567089	-1.53868	-0.976955
ENSG00000014914	MTMR11	-0.0792502	-0.0155902	-1.79535	-3.34136	0.404718	-0.7863	-1.05968	0.631542	0.770991	1.14332	-0.662959	-1.61808	0.497694	-0.068695	0.892922	0.318183	-0.068605	0.893012	0.318273	-0.068515	0.893102	0.318363	-0.068425	0.893192	0.318453	-0.068335	0.893282	0.318543	-0.068245	0.893372	0.318633	-0.068155	0.893462	0.318723	-0.068065	0.893552	0.318813	-0.067975	0.893642	0.318903	-0.067885	0.893732	0.318993	-0.067795	0.893822	0.319083	-0.067705	0.893912
ENSG00000264522	OTUD7B	1.56339	1.30278	0.857367	0.307716	-0.0237122	-3.39601	0.119751	0.299946	-0.818966	-0.601135	-0.218075	-1.95311	-0.62845	-0.398004	-0.577577	0.646715	-0.397914	-0.577487	0.646805	-0.397824	-0.577397	0.646895	-0.397734	-0.577307	0.646985	-0.397644	-0.577217	0.647075	-0.397554	-0.577127	0.647165	-0.397464	-0.577037	0.647255	-0.397374	-0.576947	0.647345	-0.397284	-0.576857	0.647435	-0.397194	-0.576767	0.647525	-0.397104	-0.576677	0.647615	-0.397014	-0.576587
ENSG00000023902	PLEKHO1	-0.30488	0.471157	-0.612626	-2.45326	1.45516	-0.982877	-0.468574	0.713303	-0.210271	0.797927	0.264452	1.08598	0.744643	-0.395929	1.87618	0.698164	-0.395839	1.87627	0.698254	-0.395749	1.87636	0.698344	-0.395659	1.87645	0.698434	-0.395569	1.87654	0.698524	-0.395479	1.87663	0.698614	-0.395389	1.87672	0.698704	-0.395299	1.87681	0.698794	-0.395209	1.8769	0.698884	-0.395119	1.87699	0.698974	-0.395029	1.87708	0.699064	-0.394939	1.87717
ENSG00000285554	NA	0.491964	0.105363	-0.656974	-0.420644	0.976156	-3.83518	-0.49941	1.73561	0.432706	1.17111	-1.84694	1.5758	1.21556	0.0939294	0.330223	0.460946	0.0940194	0.330313	0.461036	0.0941094	0.330403	0.461126	0.0941994	0.330493	0.461216	0.0942894	0.330583	0.461306	0.0943794	0.330673	0.461396	0.0944694	0.330763	0.461486	0.0945594	0.330853	0.461576	0.0946494	0.330943	0.461666	0.0947394	0.331033	0.461756	0.0948294	0.331123	0.461846	0.0949194	0.331213
ENSG00000143401	ANP32E	0.147471	-0.412394	1.03503	0.339961	0.224555	2.83977	0.196088	0.262193	0.583273	1.89628	1.68911	-0.596877	0.866496	0.780137	-1.79433	0.868343	0.780227	-1.79424	0.868433	0.780317	-1.79415	0.868523	0.780407	-1.79406	0.868613	0.780497	-1.79397	0.868703	0.780587	-1.79388	0.868793	0.780677	-1.79379	0.868883	0.780767	-1.7937	0.868973	0.780857	-1.79361	0.869063	0.780947	-1.79352	0.869153	0.781037	-1.79343	0.869243	0.781127	-1.79334
ENSG00000117362	APH1A	0.897597	0.352524	-0.48436	-0.819422	0.526535	-1.13814	0.959442	-0.135948	4.71599	0.0709559	-0.909575	0.562208	0.627239	0.615095	-0.703679	-0.138273	0.615185	-0.703589	-0.138183	0.615275	-0.703499	-0.138093	0.615365	-0.703409	-0.138003	0.615455	-0.703319	-0.137913	0.615545	-0.703229	-0.137823	0.615635	-0.703139	-0.137733	0.615725	-0.703049	-0.137643	0.615815	-0.702959	-0.137553	0.615905	-0.702869	-0.137463	0.615995	-0.702779	-0.137373	0.616085	-0.702689
ENSG00000118292	C1orf54	1.75523	1.18127	1.07047	0.687437	-1.26159	0.166401	-1.91472	-0.253534	0.328956	-1.50242	-0.942611	-0.539269	0.914118	1.37157	-1.46688	-0.21817	1.37166	-1.46679	-0.21808	1.37175	-1.4667	-0.21799	1.37184	-1.46661	-0.2179	1.37193	-1.46652	-0.21781	1.37202	-1.46643	-0.21772	1.37211	-1.46634	-0.21763	1.3722	-1.46625	-0.21754	1.37229	-1.46616	-0.21745	1.37238	-1.46607	-0.21736	1.37247	-1.46598	-0.21727	1.37256	-1.46589
ENSG00000117360	PRPF3	0.827766	-0.354813	0.616323	-0.323507	-1.822	-1.15398	-1.24609	-0.927755	-0.172911	-1.81642	0.401112	0.541671	-1.69409	-0.895223	-1.50661	-0.813746	-0.895133	-1.50652	-0.813656	-0.895043	-1.50643	-0.813566	-0.894953	-1.50634	-0.813476	-0.894863	-1.50625	-0.813386	-0.894773	-1.50616	-0.813296	-0.894683	-1.50607	-0.813206	-0.894593	-1.50598	-0.813116	-0.894503	-1.50589	-0.813026	-0.894413	-1.5058	-0.812936	-0.894323	-1.50571	-0.812846	-0.894233	-1.50562
ENSG00000163125	RPRD2	-1.49989	-0.940165	-0.33954	0.394461	-0.965185	-1.09326	0.131226	-0.949124	0.142235	-0.926719	-0.657995	-0.156913	-0.178847	-2.75059	-1.64121	-0.872536	-2.7505	-1.64112	-0.872446	-2.75041	-1.64103	-0.872356	-2.75032	-1.64094	-0.872266	-2.75023	-1.64085	-0.872176	-2.75014	-1.64076	-0.872086	-2.75005	-1.64067	-0.871996	-2.74996	-1.64058	-0.871906	-2.74987	-1.64049	-0.871816	-2.74978	-1.6404	-0.871726	-2.74969	-1.64031	-0.871636	-2.7496	-1.64022
ENSG00000143382	ADAMTSL4	-0.759388	0.878425	-1.14565	-1.55154	0.963922	-0.253091	-0.809335	2.10451	-0.222389	-0.486047	-0.351765	-0.312988	1.35989	1.20378	1.91859	-0.436269	1.20387	1.91868	-0.436179	1.20396	1.91877	-0.436089	1.20405	1.91886	-0.435999	1.20414	1.91895	-0.435909	1.20423	1.91904	-0.435819	1.20432	1.91913	-0.435729	1.20441	1.91922	-0.435639	1.2045	1.91931	-0.435549	1.20459	1.9194	-0.435459	1.20468	1.91949	-0.435369	1.20477	1.91958
ENSG00000203804	ADAMTSL4-AS1	-1.03614	-1.12557	0.372145	-0.754246	0.506844	0.177717	-0.91161	1.67236	-0.327372	0.113703	0.296731	-1.27377	-0.788011	-3.41645	0.812137	-0.0179742	-3.41636	0.812227	-0.0178842	-3.41627	0.812317	-0.0177942	-3.41618	0.812407	-0.0177042	-3.41609	0.812497	-0.0176142	-3.416	0.812587	-0.0175242	-3.41591	0.812677	-0.0174342	-3.41582	0.812767	-0.0173442	-3.41573	0.812857	-0.0172542	-3.41564	0.812947	-0.0171642	-3.41555	0.813037	-0.0170742	-3.41546	0.813127
ENSG00000277452	RN7SL473P	-2.38316	-0.68811	-1.99095	0.338374	0.918084	-0.560228	-0.670639	1.00637	0.203938	-0.0825664	-0.0709079	-1.08893	0.321226	-1.28123	1.73507	0.133237	-1.28114	1.73516	0.133327	-1.28105	1.73525	0.133417	-1.28096	1.73534	0.133507	-1.28087	1.73543	0.133597	-1.28078	1.73552	0.133687	-1.28069	1.73561	0.133777	-1.2806	1.7357	0.133867	-1.28051	1.73579	0.133957	-1.28042	1.73588	0.134047	-1.28033	1.73597	0.134137	-1.28024	1.73606
ENSG00000274963	RN7SL600P	-2.44202	0.0686367	-1.39024	0.242637	1.30224	-0.626872	0.150168	0.295135	-0.219723	-0.453279	0.0892828	-0.40247	-0.152866	-1.67762	1.59365	-0.551647	-1.67753	1.59374	-0.551557	-1.67744	1.59383	-0.551467	-1.67735	1.59392	-0.551377	-1.67726	1.59401	-0.551287	-1.67717	1.5941	-0.551197	-1.67708	1.59419	-0.551107	-1.67699	1.59428	-0.551017	-1.6769	1.59437	-0.550927	-1.67681	1.59446	-0.550837	-1.67672	1.59455	-0.550747	-1.67663	1.59464
ENSG00000143384	MCL1	-2.2	-1.75729	-0.781809	0.608914	0.768264	0.169972	0.470457	0.728721	-0.127599	0.651119	0.0449553	-0.650986	1.14506	0.201465	-0.337623	0.158887	0.201555	-0.337533	0.158977	0.201645	-0.337443	0.159067	0.201735	-0.337353	0.159157	0.201825	-0.337263	0.159247	0.201915	-0.337173	0.159337	0.202005	-0.337083	0.159427	0.202095	-0.336993	0.159517	0.202185	-0.336903	0.159607	0.202275	-0.336813	0.159697	0.202365	-0.336723	0.159787	0.202455	-0.336633
ENSG00000143457	GOLPH3L	0.164545	0.981121	0.0234824	-1.29859	-1.15088	-0.774644	0.282505	-0.583184	-0.931586	0.224072	1.89496	-1.71427	-0.962219	-1.5497	-2.18315	-0.0799366	-1.54961	-2.18306	-0.0798466	-1.54952	-2.18297	-0.0797566	-1.54943	-2.18288	-0.0796666	-1.54934	-2.18279	-0.0795766	-1.54925	-2.1827	-0.0794866	-1.54916	-2.18261	-0.0793966	-1.54907	-2.18252	-0.0793066	-1.54898	-2.18243	-0.0792166	-1.54889	-2.18234	-0.0791266	-1.5488	-2.18225	-0.0790366	-1.54871	-2.18216
ENSG00000163131	CTSS	-0.466112	-1.77609	-1.46432	-3.08407	1.02411	0.0101	0.0769255	2.25602	0.474409	0.735197	-0.353364	-0.604182	0.811759	0.186702	-0.0242973	-0.140184	0.186792	-0.0242073	-0.140094	0.186882	-0.0241173	-0.140004	0.186972	-0.0240273	-0.139914	0.187062	-0.0239373	-0.139824	0.187152	-0.0238473	-0.139734	0.187242	-0.0237573	-0.139644	0.187332	-0.0236673	-0.139554	0.187422	-0.0235773	-0.139464	0.187512	-0.0234873	-0.139374	0.187602	-0.0233973	-0.139284	0.187692	-0.0233073
ENSG00000143387	CTSK	-1.57592	-0.259024	0.106416	-1.69229	1.92564	0.508347	0.635481	-0.403295	0.463072	0.224317	-1.29703	0.242741	0.15694	1.87616	1.03529	-0.264342	1.87625	1.03538	-0.264252	1.87634	1.03547	-0.264162	1.87643	1.03556	-0.264072	1.87652	1.03565	-0.263982	1.87661	1.03574	-0.263892	1.8767	1.03583	-0.263802	1.87679	1.03592	-0.263712	1.87688	1.03601	-0.263622	1.87697	1.0361	-0.263532	1.87706	1.03619	-0.263442	1.87715	1.03628
ENSG00000143437	ARNT	-2.70885	-2.12847	-2.06901	-1.64237	0.333469	-0.703054	-0.751185	0.387025	0.689532	0.60618	0.0567763	-1.581	0.603265	0.133434	0.199652	-0.113609	0.133524	0.199742	-0.113519	0.133614	0.199832	-0.113429	0.133704	0.199922	-0.113339	0.133794	0.200012	-0.113249	0.133884	0.200102	-0.113159	0.133974	0.200192	-0.113069	0.134064	0.200282	-0.112979	0.134154	0.200372	-0.112889	0.134244	0.200462	-0.112799	0.134334	0.200552	-0.112709	0.134424	0.200642
ENSG00000143409	MINDY1	-0.476941	-0.43933	-0.198254	-1.16406	-0.562426	-1.21019	-1.04271	0.850826	2.40426	1.6251	0.203399	0.168101	0.691296	1.06252	3.17309	1.01656	1.06261	3.17318	1.01665	1.0627	3.17327	1.01674	1.06279	3.17336	1.01683	1.06288	3.17345	1.01692	1.06297	3.17354	1.01701	1.06306	3.17363	1.0171	1.06315	3.17372	1.01719	1.06324	3.17381	1.01728	1.06333	3.1739	1.01737	1.06342	3.17399	1.01746	1.06351	3.17408
ENSG00000143363	PRUNE1	-0.0208593	1.15035	-0.710872	-1.33763	-1.0868	-1.93925	-0.432157	-0.260713	1.3014	0.771423	0.663805	-0.700936	0.0183305	1.03331	3.44115	0.756449	1.0334	3.44124	0.756539	1.03349	3.44133	0.756629	1.03358	3.44142	0.756719	1.03367	3.44151	0.756809	1.03376	3.4416	0.756899	1.03385	3.44169	0.756989	1.03394	3.44178	0.757079	1.03403	3.44187	0.757169	1.03412	3.44196	0.757259	1.03421	3.44205	0.757349	1.0343	3.44214
ENSG00000143443	C1orf56	0.376135	0.584696	0.591385	-0.582316	-1.0751	-0.409299	-0.952661	-1.03422	0.0624336	-1.78635	-0.254586	1.39143	-0.596469	-3.33599	0.5122	0.243884	-3.3359	0.51229	0.243974	-3.33581	0.51238	0.244064	-3.33572	0.51247	0.244154	-3.33563	0.51256	0.244244	-3.33554	0.51265	0.244334	-3.33545	0.51274	0.244424	-3.33536	0.51283	0.244514	-3.33527	0.51292	0.244604	-3.33518	0.51301	0.244694	-3.33509	0.5131	0.244784	-3.335	0.51319
ENSG00000197622	CDC42SE1	0.0829194	1.81224	-0.396861	0.201249	0.232632	1.44367	-0.75503	1.44358	0.174559	-0.0406509	0.263331	-0.0512866	-1.31885	-1.86099	-0.614964	0.856468	-1.8609	-0.614874	0.856558	-1.86081	-0.614784	0.856648	-1.86072	-0.614694	0.856738	-1.86063	-0.614604	0.856828	-1.86054	-0.614514	0.856918	-1.86045	-0.614424	0.857008	-1.86036	-0.614334	0.857098	-1.86027	-0.614244	0.857188	-1.86018	-0.614154	0.857278	-1.86009	-0.614064	0.857368	-1.86	-0.613974
ENSG00000213190	MLLT11	-0.804288	0.325744	-0.752534	0.310882	0.0238028	1.12043	1.62935	-1.66447	-0.584832	0.381822	2.19968	0.350423	-0.459361	1.3382	-0.0528231	1.27619	1.33829	-0.0527331	1.27628	1.33838	-0.0526431	1.27637	1.33847	-0.0525531	1.27646	1.33856	-0.0524631	1.27655	1.33865	-0.0523731	1.27664	1.33874	-0.0522831	1.27673	1.33883	-0.0521931	1.27682	1.33892	-0.0521031	1.27691	1.33901	-0.0520131	1.277	1.3391	-0.0519231	1.27709	1.33919	-0.0518331
ENSG00000143458	GABPB2	1.55592	1.76082	-0.132366	-0.225258	-1.20606	0.485534	-0.23696	-0.809011	-1.35577	-0.734324	0.230642	-0.131824	-0.405532	-3.0409	-1.03119	-0.478629	-3.04081	-1.0311	-0.478539	-3.04072	-1.03101	-0.478449	-3.04063	-1.03092	-0.478359	-3.04054	-1.03083	-0.478269	-3.04045	-1.03074	-0.478179	-3.04036	-1.03065	-0.478089	-3.04027	-1.03056	-0.477999	-3.04018	-1.03047	-0.477909	-3.04009	-1.03038	-0.477819	-3.04	-1.03029	-0.477729	-3.03991	-1.0302
ENSG00000143434	SEMA6C	-1.72117	-1.31851	-0.343576	0.778922	0.192122	0.441947	-0.730811	-0.492582	-3.23806	-0.170996	0.381977	-1.63419	-0.385522	0.747171	-0.749701	-0.161706	0.747261	-0.749611	-0.161616	0.747351	-0.749521	-0.161526	0.747441	-0.749431	-0.161436	0.747531	-0.749341	-0.161346	0.747621	-0.749251	-0.161256	0.747711	-0.749161	-0.161166	0.747801	-0.749071	-0.161076	0.747891	-0.748981	-0.160986	0.747981	-0.748891	-0.160896	0.748071	-0.748801	-0.160806	0.748161	-0.748711
ENSG00000163154	TNFAIP8L2	0.278717	0.179769	-0.368635	-2.89487	-0.557804	-1.51891	-0.738006	0.700253	0.73275	-0.124311	0.552411	-1.09797	0.220667	-0.726624	0.376776	0.338431	-0.726534	0.376866	0.338521	-0.726444	0.376956	0.338611	-0.726354	0.377046	0.338701	-0.726264	0.377136	0.338791	-0.726174	0.377226	0.338881	-0.726084	0.377316	0.338971	-0.725994	0.377406	0.339061	-0.725904	0.377496	0.339151	-0.725814	0.377586	0.339241	-0.725724	0.377676	0.339331	-0.725634	0.377766
ENSG00000163157	TMOD4	1.29102	1.12132	0.316216	0.874965	-2.81346	-0.698574	-0.236163	-0.221433	0.920714	0.672416	-2.1241	-0.326903	0.288342	-0.273904	-1.30887	-0.681845	-0.273814	-1.30878	-0.681755	-0.273724	-1.30869	-0.681665	-0.273634	-1.3086	-0.681575	-0.273544	-1.30851	-0.681485	-0.273454	-1.30842	-0.681395	-0.273364	-1.30833	-0.681305	-0.273274	-1.30824	-0.681215	-0.273184	-1.30815	-0.681125	-0.273094	-1.30806	-0.681035	-0.273004	-1.30797	-0.680945	-0.272914	-1.30788
ENSG00000143398	PIP5K1A	-0.869777	-1.04056	-0.425955	-0.625125	-0.878084	-0.252408	-0.90899	-0.585649	-1.17287	-0.228948	-0.0392376	-0.75892	-0.254753	-2.85874	-1.22844	0.427183	-2.85865	-1.22835	0.427273	-2.85856	-1.22826	0.427363	-2.85847	-1.22817	0.427453	-2.85838	-1.22808	0.427543	-2.85829	-1.22799	0.427633	-2.8582	-1.2279	0.427723	-2.85811	-1.22781	0.427813	-2.85802	-1.22772	0.427903	-2.85793	-1.22763	0.427993	-2.85784	-1.22754	0.428083	-2.85775	-1.22745
ENSG00000159352	PSMD4	0.672857	1.70721	-0.154588	-1.6243	0.787178	0.620957	0.55779	0.984658	2.04179	0.0655332	-0.138369	0.390648	1.43837	1.53606	0.0773614	0.197849	1.53615	0.0774514	0.197939	1.53624	0.0775414	0.198029	1.53633	0.0776314	0.198119	1.53642	0.0777214	0.198209	1.53651	0.0778114	0.198299	1.5366	0.0779014	0.198389	1.53669	0.0779914	0.198479	1.53678	0.0780814	0.198569	1.53687	0.0781714	0.198659	1.53696	0.0782614	0.198749	1.53705	0.0783514
ENSG00000143373	ZNF687	-1.05017	0.655962	-0.45893	-0.259926	0.592615	1.32702	0.211261	0.245141	1.11885	-0.0345867	0.985772	1.84735	-0.304155	1.37965	1.23482	0.644925	1.37974	1.23491	0.645015	1.37983	1.235	0.645105	1.37992	1.23509	0.645195	1.38001	1.23518	0.645285	1.3801	1.23527	0.645375	1.38019	1.23536	0.645465	1.38028	1.23545	0.645555	1.38037	1.23554	0.645645	1.38046	1.23563	0.645735	1.38055	1.23572	0.645825	1.38064	1.23581
ENSG00000143416	SELENBP1	-0.687353	1.07628	1.35974	0.937343	-0.402687	0.715888	0.82099	-0.801955	-1.25928	1.38046	1.01519	1.80946	0.939398	1.99045	-0.292324	1.64158	1.99054	-0.292234	1.64167	1.99063	-0.292144	1.64176	1.99072	-0.292054	1.64185	1.99081	-0.291964	1.64194	1.9909	-0.291874	1.64203	1.99099	-0.291784	1.64212	1.99108	-0.291694	1.64221	1.99117	-0.291604	1.6423	1.99126	-0.291514	1.64239	1.99135	-0.291424	1.64248	1.99144	-0.291334
ENSG00000143442	POGZ	-1.80861	0.3304	-0.229811	0.778943	-0.214821	-0.581987	-0.55403	-1.20782	-1.13274	-1.67184	-0.995298	0.334065	-1.25958	-1.3269	-1.45344	-0.95337	-1.32681	-1.45335	-0.95328	-1.32672	-1.45326	-0.95319	-1.32663	-1.45317	-0.9531	-1.32654	-1.45308	-0.95301	-1.32645	-1.45299	-0.95292	-1.32636	-1.4529	-0.95283	-1.32627	-1.45281	-0.95274	-1.32618	-1.45272	-0.95265	-1.32609	-1.45263	-0.95256	-1.326	-1.45254	-0.95247	-1.32591	-1.45245
ENSG00000143367	TUFT1	-0.191388	-0.0282553	-0.0328874	0.553734	-1.8084	-1.1543	-0.275972	0.780783	0.200157	-2.63795	0.640678	-1.25357	0.294539	0.222511	-1.46027	-1.48632	0.222601	-1.46018	-1.48623	0.222691	-1.46009	-1.48614	0.222781	-1.46	-1.48605	0.222871	-1.45991	-1.48596	0.222961	-1.45982	-1.48587	0.223051	-1.45973	-1.48578	0.223141	-1.45964	-1.48569	0.223231	-1.45955	-1.4856	0.223321	-1.45946	-1.48551	0.223411	-1.45937	-1.48542	0.223501	-1.45928
ENSG00000143376	SNX27	-1.37098	-1.79325	-1.83807	-2.4076	0.300598	-1.1348	-0.548125	2.41974	0.982007	-0.0226583	-0.700942	-0.902967	0.995962	0.156904	0.948256	-0.573232	0.156994	0.948346	-0.573142	0.157084	0.948436	-0.573052	0.157174	0.948526	-0.572962	0.157264	0.948616	-0.572872	0.157354	0.948706	-0.572782	0.157444	0.948796	-0.572692	0.157534	0.948886	-0.572602	0.157624	0.948976	-0.572512	0.157714	0.949066	-0.572422	0.157804	0.949156	-0.572332	0.157894	0.949246
ENSG00000143436	MRPL9	2.08909	2.07742	0.900547	0.541843	0.319993	1.84013	0.972031	-0.238568	0.59498	0.554996	0.910215	0.761882	0.0786291	-0.114586	-1.65243	0.241245	-0.114496	-1.65234	0.241335	-0.114406	-1.65225	0.241425	-0.114316	-1.65216	0.241515	-0.114226	-1.65207	0.241605	-0.114136	-1.65198	0.241695	-0.114046	-1.65189	0.241785	-0.113956	-1.6518	0.241875	-0.113866	-1.65171	0.241965	-0.113776	-1.65162	0.242055	-0.113686	-1.65153	0.242145	-0.113596	-1.65144
ENSG00000182134	TDRKH	-0.662284	0.749812	-0.0589067	-0.245959	-0.476283	0.833872	1.62768	-1.19303	-0.65323	-0.411504	0.443103	-0.774429	-0.7787	-0.377003	-2.22296	1.19053	-0.376913	-2.22287	1.19062	-0.376823	-2.22278	1.19071	-0.376733	-2.22269	1.1908	-0.376643	-2.2226	1.19089	-0.376553	-2.22251	1.19098	-0.376463	-2.22242	1.19107	-0.376373	-2.22233	1.19116	-0.376283	-2.22224	1.19125	-0.376193	-2.22215	1.19134	-0.376103	-2.22206	1.19143	-0.376013	-2.22197
ENSG00000143365	RORC	-1.34864	-0.106097	-0.073982	-0.771986	0.833308	1.26817	-0.324008	-1.64324	-0.757063	-1.43743	-0.191206	-0.268769	-0.770977	-1.92951	-1.39582	0.465789	-1.92942	-1.39573	0.465879	-1.92933	-1.39564	0.465969	-1.92924	-1.39555	0.466059	-1.92915	-1.39546	0.466149	-1.92906	-1.39537	0.466239	-1.92897	-1.39528	0.466329	-1.92888	-1.39519	0.466419	-1.92879	-1.3951	0.466509	-1.9287	-1.39501	0.466599	-1.92861	-1.39492	0.466689	-1.92852	-1.39483
ENSG00000225556	C2CD4D	0.820444	0.138749	0.759573	-0.918537	-0.884968	0.124094	-0.68477	0.00904247	-0.919138	-0.720669	0.0409355	-0.239681	-0.513323	-3.11348	-2.0559	0.0590395	-3.11339	-2.05581	0.0591295	-3.1133	-2.05572	0.0592195	-3.11321	-2.05563	0.0593095	-3.11312	-2.05554	0.0593995	-3.11303	-2.05545	0.0594895	-3.11294	-2.05536	0.0595795	-3.11285	-2.05527	0.0596695	-3.11276	-2.05518	0.0597595	-3.11267	-2.05509	0.0598495	-3.11258	-2.055	0.0599395	-3.11249	-2.05491
ENSG00000234614	NA	1.16339	-0.127102	0.0429512	0.372218	-0.358098	0.853758	0.137518	-0.389192	-0.59352	0.185897	0.455087	-0.695672	-0.490208	-2.64736	-2.9773	-0.300145	-2.64727	-2.97721	-0.300055	-2.64718	-2.97712	-0.299965	-2.64709	-2.97703	-0.299875	-2.647	-2.97694	-0.299785	-2.64691	-2.97685	-0.299695	-2.64682	-2.97676	-0.299605	-2.64673	-2.97667	-0.299515	-2.64664	-2.97658	-0.299425	-2.64655	-2.97649	-0.299335	-2.64646	-2.9764	-0.299245	-2.64637	-2.97631
ENSG00000159445	THEM4	1.1868	1.14948	0.121544	0.528791	-0.247557	0.875535	0.364032	-2.2077	-2.21114	-0.541159	0.602599	0.171698	-0.360273	-0.802363	-3.33576	0.174475	-0.802273	-3.33567	0.174565	-0.802183	-3.33558	0.174655	-0.802093	-3.33549	0.174745	-0.802003	-3.3354	0.174835	-0.801913	-3.33531	0.174925	-0.801823	-3.33522	0.175015	-0.801733	-3.33513	0.175105	-0.801643	-3.33504	0.175195	-0.801553	-3.33495	0.175285	-0.801463	-3.33486	0.175375	-0.801373	-3.33477
ENSG00000286581	NA	0.727839	0.413897	0.480674	-0.79438	1.08987	0.830371	0.407187	0.603096	0.89443	0.616242	0.708974	-0.122894	0.492677	0.915729	-0.792799	0.548535	0.915819	-0.792709	0.548625	0.915909	-0.792619	0.548715	0.915999	-0.792529	0.548805	0.916089	-0.792439	0.548895	0.916179	-0.792349	0.548985	0.916269	-0.792259	0.549075	0.916359	-0.792169	0.549165	0.916449	-0.792079	0.549255	0.916539	-0.791989	0.549345	0.916629	-0.791899	0.549435	0.916719	-0.791809
ENSG00000197747	S100A10	0.3136	0.428539	0.181384	-0.118323	0.346485	0.909742	0.612118	2.30549	0.924434	1.87211	0.338105	0.134622	0.865233	1.98252	0.687793	0.528914	1.98261	0.687883	0.529004	1.9827	0.687973	0.529094	1.98279	0.688063	0.529184	1.98288	0.688153	0.529274	1.98297	0.688243	0.529364	1.98306	0.688333	0.529454	1.98315	0.688423	0.529544	1.98324	0.688513	0.529634	1.98333	0.688603	0.529724	1.98342	0.688693	0.529814	1.98351	0.688783
ENSG00000163191	S100A11	0.0241478	0.519141	-0.720274	-1.79143	0.71948	-0.038169	-0.910508	2.61169	1.70068	1.12856	-0.0462365	-0.533776	1.20258	2.05149	1.07721	0.534525	2.05158	1.0773	0.534615	2.05167	1.07739	0.534705	2.05176	1.07748	0.534795	2.05185	1.07757	0.534885	2.05194	1.07766	0.534975	2.05203	1.07775	0.535065	2.05212	1.07784	0.535155	2.05221	1.07793	0.535245	2.0523	1.07802	0.535335	2.05239	1.07811	0.535425	2.05248	1.0782
ENSG00000163220	S100A9	-0.214943	0.0820655	-0.755885	-1.28126	0.763948	0.669329	-0.541045	1.87375	1.6516	1.31276	0.142111	0.213586	1.55868	2.56523	1.25681	0.636546	2.56532	1.2569	0.636636	2.56541	1.25699	0.636726	2.5655	1.25708	0.636816	2.56559	1.25717	0.636906	2.56568	1.25726	0.636996	2.56577	1.25735	0.637086	2.56586	1.25744	0.637176	2.56595	1.25753	0.637266	2.56604	1.25762	0.637356	2.56613	1.25771	0.637446	2.56622	1.2578
ENSG00000163221	S100A12	-0.585629	0.137898	-0.887857	-1.05773	0.466531	0.481921	-0.546323	2.13949	1.88531	1.17061	0.252999	0.133761	1.56343	2.39996	1.50262	0.481978	2.40005	1.50271	0.482068	2.40014	1.5028	0.482158	2.40023	1.50289	0.482248	2.40032	1.50298	0.482338	2.40041	1.50307	0.482428	2.4005	1.50316	0.482518	2.40059	1.50325	0.482608	2.40068	1.50334	0.482698	2.40077	1.50343	0.482788	2.40086	1.50352	0.482878	2.40095	1.50361
ENSG00000143546	S100A8	-0.273468	0.293888	-0.564361	-1.09608	0.676418	0.788113	-0.513088	1.77707	1.62316	1.28359	0.193569	0.0233681	1.4568	2.73132	1.282	0.702779	2.73141	1.28209	0.702869	2.7315	1.28218	0.702959	2.73159	1.28227	0.703049	2.73168	1.28236	0.703139	2.73177	1.28245	0.703229	2.73186	1.28254	0.703319	2.73195	1.28263	0.703409	2.73204	1.28272	0.703499	2.73213	1.28281	0.703589	2.73222	1.2829	0.703679	2.73231	1.28299
ENSG00000197956	S100A6	0.762536	1.04857	-0.382408	-1.29231	0.642125	0.756341	0.128746	2.01185	1.19267	0.759273	-0.125876	0.263787	1.47059	2.13123	0.305471	0.0601397	2.13132	0.305561	0.0602297	2.13141	0.305651	0.0603197	2.1315	0.305741	0.0604097	2.13159	0.305831	0.0604997	2.13168	0.305921	0.0605897	2.13177	0.306011	0.0606797	2.13186	0.306101	0.0607697	2.13195	0.306191	0.0608597	2.13204	0.306281	0.0609497	2.13213	0.306371	0.0610397	2.13222	0.306461
ENSG00000196154	S100A4	0.682236	-0.431754	-0.0980405	-1.15225	0.797844	1.19983	0.462029	1.91541	0.356344	1.36011	0.521941	-0.047535	1.29815	1.70408	0.589947	0.535255	1.70417	0.590037	0.535345	1.70426	0.590127	0.535435	1.70435	0.590217	0.535525	1.70444	0.590307	0.535615	1.70453	0.590397	0.535705	1.70462	0.590487	0.535795	1.70471	0.590577	0.535885	1.7048	0.590667	0.535975	1.70489	0.590757	0.536065	1.70498	0.590847	0.536155	1.70507	0.590937
ENSG00000143553	SNAPIN	0.615821	1.22795	1.34323	-1.89963	-0.023734	0.102742	-0.736863	1.70022	1.04149	0.579765	1.62627	-1.11306	0.634361	1.16234	-0.577548	0.482494	1.16243	-0.577458	0.482584	1.16252	-0.577368	0.482674	1.16261	-0.577278	0.482764	1.1627	-0.577188	0.482854	1.16279	-0.577098	0.482944	1.16288	-0.577008	0.483034	1.16297	-0.576918	0.483124	1.16306	-0.576828	0.483214	1.16315	-0.576738	0.483304	1.16324	-0.576648	0.483394	1.16333	-0.576558
ENSG00000143554	SLC27A3	-0.784225	1.02953	-1.1772	-2.11649	0.484168	0.261558	-0.55114	2.62374	1.05879	-0.130529	-0.240316	-0.693972	0.766667	-0.644871	0.131215	0.220007	-0.644781	0.131305	0.220097	-0.644691	0.131395	0.220187	-0.644601	0.131485	0.220277	-0.644511	0.131575	0.220367	-0.644421	0.131665	0.220457	-0.644331	0.131755	0.220547	-0.644241	0.131845	0.220637	-0.644151	0.131935	0.220727	-0.644061	0.132025	0.220817	-0.643971	0.132115	0.220907	-0.643881	0.132205
ENSG00000143614	GATAD2B	-1.19932	0.791897	-0.834539	0.513086	0.569166	-2.21174	-0.843293	-0.768469	-3.45863	0.0207543	0.529397	0.135947	0.398767	-1.48338	-0.023381	-0.0423451	-1.48329	-0.023291	-0.0422551	-1.4832	-0.023201	-0.0421651	-1.48311	-0.023111	-0.0420751	-1.48302	-0.023021	-0.0419851	-1.48293	-0.022931	-0.0418951	-1.48284	-0.022841	-0.0418051	-1.48275	-0.022751	-0.0417151	-1.48266	-0.022661	-0.0416251	-1.48257	-0.022571	-0.0415351	-1.48248	-0.022481	-0.0414451	-1.48239	-0.022391
ENSG00000198837	DENND4B	-2.41417	-1.37621	-1.05038	0.552231	0.872156	-0.926332	-0.225759	-0.0173169	-2.1	-1.09837	-0.556185	0.575835	0.541073	-1.12425	0.589309	-0.751614	-1.12416	0.589399	-0.751524	-1.12407	0.589489	-0.751434	-1.12398	0.589579	-0.751344	-1.12389	0.589669	-0.751254	-1.1238	0.589759	-0.751164	-1.12371	0.589849	-0.751074	-1.12362	0.589939	-0.750984	-1.12353	0.590029	-0.750894	-1.12344	0.590119	-0.750804	-1.12335	0.590209	-0.750714	-1.12326	0.590299
ENSG00000143578	CREB3L4	-0.660709	0.483373	1.63837	-0.181948	0.468249	-0.55727	-0.078328	-0.586832	-1.28504	-0.713733	-0.26002	2.29842	0.564034	-1.11476	-1.10842	0.263536	-1.11467	-1.10833	0.263626	-1.11458	-1.10824	0.263716	-1.11449	-1.10815	0.263806	-1.1144	-1.10806	0.263896	-1.11431	-1.10797	0.263986	-1.11422	-1.10788	0.264076	-1.11413	-1.10779	0.264166	-1.11404	-1.1077	0.264256	-1.11395	-1.10761	0.264346	-1.11386	-1.10752	0.264436	-1.11377	-1.10743
ENSG00000177954	RPS27	2.14426	0.313887	-0.212567	0.880943	-0.0970849	-0.255804	0.324802	-2.39675	-2.22386	-0.899576	0.105686	-0.262543	-0.92944	-1.05429	-2.30678	0.0184917	-1.0542	-2.30669	0.0185817	-1.05411	-2.3066	0.0186717	-1.05402	-2.30651	0.0187617	-1.05393	-2.30642	0.0188517	-1.05384	-2.30633	0.0189417	-1.05375	-2.30624	0.0190317	-1.05366	-2.30615	0.0191217	-1.05357	-2.30606	0.0192117	-1.05348	-2.30597	0.0193017	-1.05339	-2.30588	0.0193917	-1.0533	-2.30579
ENSG00000143549	TPM3	0.0804937	-0.0798786	-0.346782	-0.824237	1.25648	1.48279	0.881221	0.971155	1.53417	1.08122	0.0701103	0.594719	1.51614	2.43392	0.229174	0.222461	2.43401	0.229264	0.222551	2.4341	0.229354	0.222641	2.43419	0.229444	0.222731	2.43428	0.229534	0.222821	2.43437	0.229624	0.222911	2.43446	0.229714	0.223001	2.43455	0.229804	0.223091	2.43464	0.229894	0.223181	2.43473	0.229984	0.223271	2.43482	0.230074	0.223361	2.43491	0.230164
ENSG00000143595	AQP10	-0.661917	0.547687	0.0628674	-0.331515	-0.393067	-0.994584	-0.260236	-0.347613	0.469871	1.28831	1.13407	1.02867	1.38367	2.68746	1.73865	1.4954	2.68755	1.73874	1.49549	2.68764	1.73883	1.49558	2.68773	1.73892	1.49567	2.68782	1.73901	1.49576	2.68791	1.7391	1.49585	2.688	1.73919	1.49594	2.68809	1.73928	1.49603	2.68818	1.73937	1.49612	2.68827	1.73946	1.49621	2.68836	1.73955	1.4963	2.68845	1.73964
ENSG00000143515	ATP8B2	-0.975	-0.074276	1.02903	0.919693	-0.469644	0.385472	0.800402	-1.82841	-1.70594	-0.188616	1.12022	-0.41855	0.209571	-1.74278	-2.43932	0.709021	-1.74269	-2.43923	0.709111	-1.7426	-2.43914	0.709201	-1.74251	-2.43905	0.709291	-1.74242	-2.43896	0.709381	-1.74233	-2.43887	0.709471	-1.74224	-2.43878	0.709561	-1.74215	-2.43869	0.709651	-1.74206	-2.4386	0.709741	-1.74197	-2.43851	0.709831	-1.74188	-2.43842	0.709921	-1.74179	-2.43833
ENSG00000228013	IL6R-AS1	-1.97227	-0.321036	0.919486	-0.215992	2.49447	0.802822	0.865584	-0.464547	-0.942224	1.61444	0.783805	0.931511	1.19366	1.48162	-0.0292	1.0722	1.48171	-0.02911	1.07229	1.4818	-0.02902	1.07238	1.48189	-0.02893	1.07247	1.48198	-0.02884	1.07256	1.48207	-0.02875	1.07265	1.48216	-0.02866	1.07274	1.48225	-0.02857	1.07283	1.48234	-0.02848	1.07292	1.48243	-0.02839	1.07301	1.48252	-0.0283	1.0731	1.48261	-0.02821
ENSG00000160712	IL6R	-1.71537	-2.17814	-1.27298	-1.01016	-0.761063	-0.967303	-0.665626	0.667145	-0.991645	-1.01645	-0.243239	-0.92368	0.981169	0.970329	-0.774803	-0.999373	0.970419	-0.774713	-0.999283	0.970509	-0.774623	-0.999193	0.970599	-0.774533	-0.999103	0.970689	-0.774443	-0.999013	0.970779	-0.774353	-0.998923	0.970869	-0.774263	-0.998833	0.970959	-0.774173	-0.998743	0.971049	-0.774083	-0.998653	0.971139	-0.773993	-0.998563	0.971229	-0.773903	-0.998473	0.971319	-0.773813
ENSG00000160714	UBE2Q1	0.834338	1.27913	0.147878	0.316267	1.28373	1.12061	0.180011	0.62978	-4.12774	0.610048	0.690265	-0.115194	0.424509	0.503848	0.0901647	0.67637	0.503938	0.0902547	0.67646	0.504028	0.0903447	0.67655	0.504118	0.0904347	0.67664	0.504208	0.0905247	0.67673	0.504298	0.0906147	0.67682	0.504388	0.0907047	0.67691	0.504478	0.0907947	0.677	0.504568	0.0908847	0.67709	0.504658	0.0909747	0.67718	0.504748	0.0910647	0.67727	0.504838	0.0911547
ENSG00000160710	ADAR	-0.491165	1.99636	-0.284119	-1.67803	-0.935921	-0.509949	-0.196262	2.27611	3.05827	-1.03912	-0.682518	-0.594308	-0.589193	-1.65703	-0.465474	-0.971791	-1.65694	-0.465384	-0.971701	-1.65685	-0.465294	-0.971611	-1.65676	-0.465204	-0.971521	-1.65667	-0.465114	-0.971431	-1.65658	-0.465024	-0.971341	-1.65649	-0.464934	-0.971251	-1.6564	-0.464844	-0.971161	-1.65631	-0.464754	-0.971071	-1.65622	-0.464664	-0.970981	-1.65613	-0.464574	-0.970891	-1.65604	-0.464484
ENSG00000143603	KCNN3	0.074892	0.608777	1.65769	0.902798	0.494605	1.34529	0.731838	1.1574	1.12226	0.562495	0.786876	0.514017	1.18831	1.02465	1.28558	0.891405	1.02474	1.28567	0.891495	1.02483	1.28576	0.891585	1.02492	1.28585	0.891675	1.02501	1.28594	0.891765	1.0251	1.28603	0.891855	1.02519	1.28612	0.891945	1.02528	1.28621	0.892035	1.02537	1.2863	0.892125	1.02546	1.28639	0.892215	1.02555	1.28648	0.892305	1.02564	1.28657
ENSG00000163344	PMVK	-0.314071	0.0763768	0.906835	0.143738	1.0081	1.69479	1.40565	0.85916	1.0487	-0.0182279	0.332437	-1.17696	2.56649	0.935696	0.670803	0.582073	0.935786	0.670893	0.582163	0.935876	0.670983	0.582253	0.935966	0.671073	0.582343	0.936056	0.671163	0.582433	0.936146	0.671253	0.582523	0.936236	0.671343	0.582613	0.936326	0.671433	0.582703	0.936416	0.671523	0.582793	0.936506	0.671613	0.582883	0.936596	0.671703	0.582973	0.936686	0.671793
ENSG00000163346	PBXIP1	-0.225949	-0.112155	0.333995	1.40956	-0.0988239	-0.655461	0.970392	-3.38826	-1.25614	-0.698874	-0.146307	0.254077	-0.440288	-2.36799	-1.35871	0.215682	-2.3679	-1.35862	0.215772	-2.36781	-1.35853	0.215862	-2.36772	-1.35844	0.215952	-2.36763	-1.35835	0.216042	-2.36754	-1.35826	0.216132	-2.36745	-1.35817	0.216222	-2.36736	-1.35808	0.216312	-2.36727	-1.35799	0.216402	-2.36718	-1.3579	0.216492	-2.36709	-1.35781	0.216582	-2.367	-1.35772
ENSG00000163348	PYGO2	-0.240498	0.687686	-0.773417	-0.382865	-1.14136	-1.13065	-0.1142	-1.35363	-0.514696	-1.34715	0.691979	-1.99872	-0.666163	-2.33392	-1.04023	0.174166	-2.33383	-1.04014	0.174256	-2.33374	-1.04005	0.174346	-2.33365	-1.03996	0.174436	-2.33356	-1.03987	0.174526	-2.33347	-1.03978	0.174616	-2.33338	-1.03969	0.174706	-2.33329	-1.0396	0.174796	-2.3332	-1.03951	0.174886	-2.33311	-1.03942	0.174976	-2.33302	-1.03933	0.175066	-2.33293	-1.03924
ENSG00000173207	CKS1B	1.70438	-0.0151364	1.07005	0.873057	-0.167649	2.16198	0.88632	0.180727	0.0805372	1.57152	1.02066	-0.712656	1.15818	1.26551	-1.12414	0.917989	1.2656	-1.12405	0.918079	1.26569	-1.12396	0.918169	1.26578	-1.12387	0.918259	1.26587	-1.12378	0.918349	1.26596	-1.12369	0.918439	1.26605	-1.1236	0.918529	1.26614	-1.12351	0.918619	1.26623	-1.12342	0.918709	1.26632	-1.12333	0.918799	1.26641	-1.12324	0.918889	1.2665	-1.12315
ENSG00000160688	FLAD1	0.713774	2.49252	0.134595	0.165609	0.153013	0.265345	-0.111899	0.183488	0.94364	-0.498738	0.296912	-0.020013	-0.0574056	-0.732685	-0.418439	0.129198	-0.732595	-0.418349	0.129288	-0.732505	-0.418259	0.129378	-0.732415	-0.418169	0.129468	-0.732325	-0.418079	0.129558	-0.732235	-0.417989	0.129648	-0.732145	-0.417899	0.129738	-0.732055	-0.417809	0.129828	-0.731965	-0.417719	0.129918	-0.731875	-0.417629	0.130008	-0.731785	-0.417539	0.130098	-0.731695	-0.417449
ENSG00000160685	ZBTB7B	-1.51594	0.30354	-1.1692	-1.016	1.12037	-0.701559	-0.684868	1.13912	-0.712702	-0.112487	0.2882	-1.27443	0.438869	0.58621	0.625568	0.115329	0.5863	0.625658	0.115419	0.58639	0.625748	0.115509	0.58648	0.625838	0.115599	0.58657	0.625928	0.115689	0.58666	0.626018	0.115779	0.58675	0.626108	0.115869	0.58684	0.626198	0.115959	0.58693	0.626288	0.116049	0.58702	0.626378	0.116139	0.58711	0.626468	0.116229	0.5872	0.626558
ENSG00000143537	ADAM15	-1.64056	-0.281976	-2.27165	-0.485374	0.651711	0.738781	0.0298662	1.90387	0.360361	0.103598	-0.187955	-0.186751	1.73844	2.02442	0.219156	-0.34641	2.02451	0.219246	-0.34632	2.0246	0.219336	-0.34623	2.02469	0.219426	-0.34614	2.02478	0.219516	-0.34605	2.02487	0.219606	-0.34596	2.02496	0.219696	-0.34587	2.02505	0.219786	-0.34578	2.02514	0.219876	-0.34569	2.02523	0.219966	-0.3456	2.02532	0.220056	-0.34551	2.02541	0.220146
ENSG00000243364	EFNA4	1.05963	-0.128766	-0.771836	-1.49501	-1.6172	-1.17653	-1.96287	0.0993286	1.68486	-1.47943	1.25278	-1.00214	-0.770936	-1.20001	0.888413	-0.115969	-1.19992	0.888503	-0.115879	-1.19983	0.888593	-0.115789	-1.19974	0.888683	-0.115699	-1.19965	0.888773	-0.115609	-1.19956	0.888863	-0.115519	-1.19947	0.888953	-0.115429	-1.19938	0.889043	-0.115339	-1.19929	0.889133	-0.115249	-1.1992	0.889223	-0.115159	-1.19911	0.889313	-0.115069	-1.19902	0.889403
ENSG00000169242	EFNA1	-0.859172	-0.45978	-0.434142	1.34971	0.129641	0.339348	-0.837847	-2.05047	-0.191508	-1.10704	0.688994	-0.333806	-0.148759	-1.07417	-0.614186	-0.851072	-1.07408	-0.614096	-0.850982	-1.07399	-0.614006	-0.850892	-1.0739	-0.613916	-0.850802	-1.07381	-0.613826	-0.850712	-1.07372	-0.613736	-0.850622	-1.07363	-0.613646	-0.850532	-1.07354	-0.613556	-0.850442	-1.07345	-0.613466	-0.850352	-1.07336	-0.613376	-0.850262	-1.07327	-0.613286	-0.850172	-1.07318	-0.613196
ENSG00000179085	DPM3	0.730506	1.03526	-0.0702632	-0.0956344	0.92778	1.02435	1.35511	-0.4566	1.66082	0.65218	-0.187647	-0.567178	1.66302	1.69802	1.11815	1.26503	1.69811	1.11824	1.26512	1.6982	1.11833	1.26521	1.69829	1.11842	1.2653	1.69838	1.11851	1.26539	1.69847	1.1186	1.26548	1.69856	1.11869	1.26557	1.69865	1.11878	1.26566	1.69874	1.11887	1.26575	1.69883	1.11896	1.26584	1.69892	1.11905	1.26593	1.69901	1.11914
ENSG00000163463	KRTCAP2	-0.508284	1.80756	1.7278	0.809772	0.335387	0.756673	0.649475	0.493135	-0.501391	-0.261497	1.88675	0.0961413	-1.73954	-0.476448	-0.64821	0.273664	-0.476358	-0.64812	0.273754	-0.476268	-0.64803	0.273844	-0.476178	-0.64794	0.273934	-0.476088	-0.64785	0.274024	-0.475998	-0.64776	0.274114	-0.475908	-0.64767	0.274204	-0.475818	-0.64758	0.274294	-0.475728	-0.64749	0.274384	-0.475638	-0.6474	0.274474	-0.475548	-0.64731	0.274564	-0.475458	-0.64722
ENSG00000163462	TRIM46	0.422838	1.47212	0.694139	1.02364	0.395756	0.476787	-0.439381	-1.74902	-2.79924	-1.52935	0.0642138	1.13149	0.031709	-0.837709	-1.83307	0.220763	-0.837619	-1.83298	0.220853	-0.837529	-1.83289	0.220943	-0.837439	-1.8328	0.221033	-0.837349	-1.83271	0.221123	-0.837259	-1.83262	0.221213	-0.837169	-1.83253	0.221303	-0.837079	-1.83244	0.221393	-0.836989	-1.83235	0.221483	-0.836899	-1.83226	0.221573	-0.836809	-1.83217	0.221663	-0.836719	-1.83208
ENSG00000169231	THBS3	-1.99816	-1.21484	0.534313	-0.0151538	1.22447	-0.104155	0.740586	0.422531	-0.324461	-1.38692	-0.0236338	1.9788	0.340021	-0.628426	-0.346605	0.0876441	-0.628336	-0.346515	0.0877341	-0.628246	-0.346425	0.0878241	-0.628156	-0.346335	0.0879141	-0.628066	-0.346245	0.0880041	-0.627976	-0.346155	0.0880941	-0.627886	-0.346065	0.0881841	-0.627796	-0.345975	0.0882741	-0.627706	-0.345885	0.0883641	-0.627616	-0.345795	0.0884541	-0.627526	-0.345705	0.0885441	-0.627436	-0.345615
ENSG00000173171	MTX1	-0.521707	0.143946	-0.0611024	-0.545032	0.791925	0.445576	0.206061	1.95608	1.62454	1.1845	0.30822	0.718059	1.69346	2.65508	-0.180172	0.272217	2.65517	-0.180082	0.272307	2.65526	-0.179992	0.272397	2.65535	-0.179902	0.272487	2.65544	-0.179812	0.272577	2.65553	-0.179722	0.272667	2.65562	-0.179632	0.272757	2.65571	-0.179542	0.272847	2.6558	-0.179452	0.272937	2.65589	-0.179362	0.273027	2.65598	-0.179272	0.273117	2.65607	-0.179182
ENSG00000160766	GBAP1	0.112255	1.02855	-0.322845	0.351894	1.75194	1.49762	-0.461594	-1.73134	-0.887547	-0.583311	-0.270422	2.51855	0.0963443	-1.62104	0.172296	-0.0415	-1.62095	0.172386	-0.04141	-1.62086	0.172476	-0.04132	-1.62077	0.172566	-0.04123	-1.62068	0.172656	-0.04114	-1.62059	0.172746	-0.04105	-1.6205	0.172836	-0.04096	-1.62041	0.172926	-0.04087	-1.62032	0.173016	-0.04078	-1.62023	0.173106	-0.04069	-1.62014	0.173196	-0.0406	-1.62005	0.173286
ENSG00000177628	GBA	-0.850379	0.0133407	-0.550319	-1.13377	1.00108	0.389209	0.320699	2.07532	2.4385	0.564196	-0.627585	-0.915949	1.57703	1.73198	0.600378	-0.379631	1.73207	0.600468	-0.379541	1.73216	0.600558	-0.379451	1.73225	0.600648	-0.379361	1.73234	0.600738	-0.379271	1.73243	0.600828	-0.379181	1.73252	0.600918	-0.379091	1.73261	0.601008	-0.379001	1.7327	0.601098	-0.378911	1.73279	0.601188	-0.378821	1.73288	0.601278	-0.378731	1.73297	0.601368
ENSG00000160767	FAM189B	-0.914341	0.33702	-0.580295	0.432085	1.23733	0.14186	-0.290453	1.01864	-1.56797	0.534651	0.704023	0.103596	0.902143	1.73616	2.31985	0.879685	1.73625	2.31994	0.879775	1.73634	2.32003	0.879865	1.73643	2.32012	0.879955	1.73652	2.32021	0.880045	1.73661	2.3203	0.880135	1.7367	2.32039	0.880225	1.73679	2.32048	0.880315	1.73688	2.32057	0.880405	1.73697	2.32066	0.880495	1.73706	2.32075	0.880585	1.73715	2.32084
ENSG00000176444	CLK2	-0.249509	0.943409	-0.0507133	-0.487489	-0.0316308	-1.23973	0.0860313	-0.327188	-2.46111	-1.20618	1.20401	0.352162	-0.235095	-1.98277	-0.42201	0.611245	-1.98268	-0.42192	0.611335	-1.98259	-0.42183	0.611425	-1.9825	-0.42174	0.611515	-1.98241	-0.42165	0.611605	-1.98232	-0.42156	0.611695	-1.98223	-0.42147	0.611785	-1.98214	-0.42138	0.611875	-1.98205	-0.42129	0.611965	-1.98196	-0.4212	0.612055	-1.98187	-0.42111	0.612145	-1.98178	-0.42102
ENSG00000143630	HCN3	-2.22897	-0.311447	1.57418	0.548963	1.52442	-0.645431	1.73811	0.0304136	-0.521982	0.180036	-1.20995	-0.137047	0.62283	-0.620297	2.14486	-0.202416	-0.620207	2.14495	-0.202326	-0.620117	2.14504	-0.202236	-0.620027	2.14513	-0.202146	-0.619937	2.14522	-0.202056	-0.619847	2.14531	-0.201966	-0.619757	2.1454	-0.201876	-0.619667	2.14549	-0.201786	-0.619577	2.14558	-0.201696	-0.619487	2.14567	-0.201606	-0.619397	2.14576	-0.201516	-0.619307	2.14585
ENSG00000160752	FDPS	0.755965	0.687147	0.899191	0.451939	0.0893131	1.80913	0.25985	1.14613	1.13408	1.44431	0.172423	-0.322723	1.02241	2.43436	0.191773	1.0811	2.43445	0.191863	1.08119	2.43454	0.191953	1.08128	2.43463	0.192043	1.08137	2.43472	0.192133	1.08146	2.43481	0.192223	1.08155	2.4349	0.192313	1.08164	2.43499	0.192403	1.08173	2.43508	0.192493	1.08182	2.43517	0.192583	1.08191	2.43526	0.192673	1.082	2.43535	0.192763
ENSG00000160753	RUSC1	0.237936	2.3348	-1.34662	-0.604129	1.60803	0.84749	-0.623158	1.6082	1.34056	0.756175	0.00554402	-0.4399	1.48871	0.84892	1.02219	0.0855252	0.84901	1.02228	0.0856152	0.8491	1.02237	0.0857052	0.84919	1.02246	0.0857952	0.84928	1.02255	0.0858852	0.84937	1.02264	0.0859752	0.84946	1.02273	0.0860652	0.84955	1.02282	0.0861552	0.84964	1.02291	0.0862452	0.84973	1.023	0.0863352	0.84982	1.02309	0.0864252	0.84991	1.02318
ENSG00000237872	POU5F1P4	-2.28673	-0.626875	1.24875	-1.07588	0.213313	-1.25686	-1.67556	0.0415901	0.0884776	-0.239128	-1.09299	-0.283219	0.181855	-1.25133	0.393924	0.231109	-1.25124	0.394014	0.231199	-1.25115	0.394104	0.231289	-1.25106	0.394194	0.231379	-1.25097	0.394284	0.231469	-1.25088	0.394374	0.231559	-1.25079	0.394464	0.231649	-1.2507	0.394554	0.231739	-1.25061	0.394644	0.231829	-1.25052	0.394734	0.231919	-1.25043	0.394824	0.232009	-1.25034	0.394914
ENSG00000235919	ASH1L-AS1	0.525022	1.83505	-0.0155416	1.49256	-0.747417	0.486408	-0.0953105	0.676563	-0.966713	-0.348884	0.274569	-0.244326	-0.852422	1.35837	-1.37416	-1.73914	1.35846	-1.37407	-1.73905	1.35855	-1.37398	-1.73896	1.35864	-1.37389	-1.73887	1.35873	-1.3738	-1.73878	1.35882	-1.37371	-1.73869	1.35891	-1.37362	-1.7386	1.359	-1.37353	-1.73851	1.35909	-1.37344	-1.73842	1.35918	-1.37335	-1.73833	1.35927	-1.37326	-1.73824	1.35936	-1.37317
ENSG00000125459	MSTO1	0.141475	0.364419	2.35584	0.254951	-1.27813	0.467757	0.0232999	0.131324	0.133479	-1.05088	1.06762	1.44838	1.14361	-1.34571	-1.0502	0.690446	-1.34562	-1.05011	0.690536	-1.34553	-1.05002	0.690626	-1.34544	-1.04993	0.690716	-1.34535	-1.04984	0.690806	-1.34526	-1.04975	0.690896	-1.34517	-1.04966	0.690986	-1.34508	-1.04957	0.691076	-1.34499	-1.04948	0.691166	-1.3449	-1.04939	0.691256	-1.34481	-1.0493	0.691346	-1.34472	-1.04921
ENSG00000287839	NA	0.821143	1.55429	-1.41276	-2.19782	-0.497908	0.417524	-0.0629512	2.33807	-0.620815	1.00715	0.114236	-0.412127	-1.43891	0.0980059	0.84373	0.073675	0.0980959	0.84382	0.073765	0.0981859	0.84391	0.073855	0.0982759	0.844	0.073945	0.0983659	0.84409	0.074035	0.0984559	0.84418	0.074125	0.0985459	0.84427	0.074215	0.0986359	0.84436	0.074305	0.0987259	0.84445	0.074395	0.0988159	0.84454	0.074485	0.0989059	0.84463	0.074575	0.0989959	0.84472
ENSG00000203761	NA	-0.850029	0.243422	1.45008	-0.177864	-1.33309	-0.407637	0.512554	-1.98491	-0.487788	-1.42393	0.428513	1.73066	-1.49991	-2.1101	-1.61947	-0.402279	-2.11001	-1.61938	-0.402189	-2.10992	-1.61929	-0.402099	-2.10983	-1.6192	-0.402009	-2.10974	-1.61911	-0.401919	-2.10965	-1.61902	-0.401829	-2.10956	-1.61893	-0.401739	-2.10947	-1.61884	-0.401649	-2.10938	-1.61875	-0.401559	-2.10929	-1.61866	-0.401469	-2.1092	-1.61857	-0.401379	-2.10911	-1.61848
ENSG00000132718	SYT11	-0.772179	1.00895	-0.672362	-1.45657	0.813279	0.727927	0.901265	0.272447	2.65586	1.01746	-0.357505	-0.0825099	1.23955	-0.636057	0.406841	0.192004	-0.635967	0.406931	0.192094	-0.635877	0.407021	0.192184	-0.635787	0.407111	0.192274	-0.635697	0.407201	0.192364	-0.635607	0.407291	0.192454	-0.635517	0.407381	0.192544	-0.635427	0.407471	0.192634	-0.635337	0.407561	0.192724	-0.635247	0.407651	0.192814	-0.635157	0.407741	0.192904	-0.635067	0.407831
ENSG00000143622	RIT1	-0.748638	0.130598	-1.5198	-1.07307	0.381036	0.000516198	-0.0718935	1.0315	1.6039	0.713234	-0.506241	-0.872991	1.33913	3.32758	1.17284	-0.0554987	3.32767	1.17293	-0.0554087	3.32776	1.17302	-0.0553187	3.32785	1.17311	-0.0552287	3.32794	1.1732	-0.0551387	3.32803	1.17329	-0.0550487	3.32812	1.17338	-0.0549587	3.32821	1.17347	-0.0548687	3.3283	1.17356	-0.0547787	3.32839	1.17365	-0.0546887	3.32848	1.17374	-0.0545987	3.32857	1.17383
ENSG00000132680	KHDC4	-0.623283	-0.664765	0.310172	0.310219	-1.04918	-0.904452	-1.39818	-0.736615	-0.479639	-0.832497	0.431581	-0.411208	-1.75882	-2.15362	-1.08221	-0.405624	-2.15353	-1.08212	-0.405534	-2.15344	-1.08203	-0.405444	-2.15335	-1.08194	-0.405354	-2.15326	-1.08185	-0.405264	-2.15317	-1.08176	-0.405174	-2.15308	-1.08167	-0.405084	-2.15299	-1.08158	-0.404994	-2.1529	-1.08149	-0.404904	-2.15281	-1.0814	-0.404814	-2.15272	-1.08131	-0.404724	-2.15263	-1.08122
ENSG00000116584	ARHGEF2	-1.12523	-0.673534	-1.15287	-0.801216	0.0627079	-2.30872	-0.78142	0.115772	-1.10929	-1.07261	-0.136731	-0.864846	-0.48759	-1.31577	-0.537436	-0.263022	-1.31568	-0.537346	-0.262932	-1.31559	-0.537256	-0.262842	-1.3155	-0.537166	-0.262752	-1.31541	-0.537076	-0.262662	-1.31532	-0.536986	-0.262572	-1.31523	-0.536896	-0.262482	-1.31514	-0.536806	-0.262392	-1.31505	-0.536716	-0.262302	-1.31496	-0.536626	-0.262212	-1.31487	-0.536536	-0.262122	-1.31478	-0.536446
ENSG00000163479	SSR2	0.878896	0.601947	1.63137	0.607101	0.784806	1.38929	0.819142	0.711148	0.799152	0.728671	0.236199	-0.203785	1.91913	1.68221	-0.299698	0.814997	1.6823	-0.299608	0.815087	1.68239	-0.299518	0.815177	1.68248	-0.299428	0.815267	1.68257	-0.299338	0.815357	1.68266	-0.299248	0.815447	1.68275	-0.299158	0.815537	1.68284	-0.299068	0.815627	1.68293	-0.298978	0.815717	1.68302	-0.298888	0.815807	1.68311	-0.298798	0.815897	1.6832	-0.298708
ENSG00000160803	UBQLN4	-1.07213	1.2368	-1.44332	0.900859	0.405606	-0.49536	0.265973	-1.5829	-2.91009	-0.774289	-1.4438	-0.266889	0.263381	-1.28615	-0.286621	0.276606	-1.28606	-0.286531	0.276696	-1.28597	-0.286441	0.276786	-1.28588	-0.286351	0.276876	-1.28579	-0.286261	0.276966	-1.2857	-0.286171	0.277056	-1.28561	-0.286081	0.277146	-1.28552	-0.285991	0.277236	-1.28543	-0.285901	0.277326	-1.28534	-0.285811	0.277416	-1.28525	-0.285721	0.277506	-1.28516	-0.285631
ENSG00000116586	LAMTOR2	0.362856	0.951764	-0.293867	-0.771819	0.886459	1.00788	0.880799	1.59685	1.25867	0.340157	0.255339	-0.738929	1.77817	1.94611	0.622719	0.54792	1.9462	0.622809	0.54801	1.94629	0.622899	0.5481	1.94638	0.622989	0.54819	1.94647	0.623079	0.54828	1.94656	0.623169	0.54837	1.94665	0.623259	0.54846	1.94674	0.623349	0.54855	1.94683	0.623439	0.54864	1.94692	0.623529	0.54873	1.94701	0.623619	0.54882	1.9471	0.623709
ENSG00000160789	LMNA	-1.59083	-0.211812	0.514194	2.15965	-0.313762	0.464385	0.303644	0.239125	0.329468	0.166047	-0.379243	0.0201423	0.279582	1.14355	0.584698	-0.326224	1.14364	0.584788	-0.326134	1.14373	0.584878	-0.326044	1.14382	0.584968	-0.325954	1.14391	0.585058	-0.325864	1.144	0.585148	-0.325774	1.14409	0.585238	-0.325684	1.14418	0.585328	-0.325594	1.14427	0.585418	-0.325504	1.14436	0.585508	-0.325414	1.14445	0.585598	-0.325324	1.14454	0.585688
ENSG00000196189	SEMA4A	-2.01179	-0.261797	0.503653	-0.469658	0.533062	0.617574	0.153427	2.29	2.19456	-0.133259	-1.11174	-0.851391	1.68487	1.28933	0.539055	-0.777885	1.28942	0.539145	-0.777795	1.28951	0.539235	-0.777705	1.2896	0.539325	-0.777615	1.28969	0.539415	-0.777525	1.28978	0.539505	-0.777435	1.28987	0.539595	-0.777345	1.28996	0.539685	-0.777255	1.29005	0.539775	-0.777165	1.29014	0.539865	-0.777075	1.29023	0.539955	-0.776985	1.29032	0.540045
ENSG00000160785	SLC25A44	-1.72785	-1.54581	-1.96536	-0.616711	-0.498991	-1.62059	-0.853031	1.09241	0.475879	-0.595414	-0.100244	-2.16417	0.781678	0.571572	-0.568045	-0.870692	0.571662	-0.567955	-0.870602	0.571752	-0.567865	-0.870512	0.571842	-0.567775	-0.870422	0.571932	-0.567685	-0.870332	0.572022	-0.567595	-0.870242	0.572112	-0.567505	-0.870152	0.572202	-0.567415	-0.870062	0.572292	-0.567325	-0.869972	0.572382	-0.567235	-0.869882	0.572472	-0.567145	-0.869792	0.572562	-0.567055
ENSG00000160783	PMF1	-0.418224	0.751589	-0.35766	1.65655	1.91151	0.948597	0.332085	-0.28509	0.343237	0.39822	-1.23868	1.10665	0.925641	2.21823	-2.50576	0.0146244	2.21832	-2.50567	0.0147144	2.21841	-2.50558	0.0148044	2.2185	-2.50549	0.0148944	2.21859	-2.5054	0.0149844	2.21868	-2.50531	0.0150744	2.21877	-2.50522	0.0151644	2.21886	-2.50513	0.0152544	2.21895	-2.50504	0.0153444	2.21904	-2.50495	0.0154344	2.21913	-2.50486	0.0155244	2.21922	-2.50477
ENSG00000160781	PAQR6	-0.46155	-1.24611	0.522182	0.546886	1.66395	0.727578	-0.0072252	0.999466	0.660231	0.40692	-0.195214	-1.70233	1.28309	-0.467525	0.146643	0.6162	-0.467435	0.146733	0.61629	-0.467345	0.146823	0.61638	-0.467255	0.146913	0.61647	-0.467165	0.147003	0.61656	-0.467075	0.147093	0.61665	-0.466985	0.147183	0.61674	-0.466895	0.147273	0.61683	-0.466805	0.147363	0.61692	-0.466715	0.147453	0.61701	-0.466625	0.147543	0.6171	-0.466535	0.147633
ENSG00000198952	SMG5	-2.55199	-1.3236	-1.0001	0.951904	0.960419	-1.59259	-0.834849	0.408649	-0.207045	-0.815913	-1.00538	-0.989588	-0.0314267	-0.384697	-0.288646	-1.16939	-0.384607	-0.288556	-1.1693	-0.384517	-0.288466	-1.16921	-0.384427	-0.288376	-1.16912	-0.384337	-0.288286	-1.16903	-0.384247	-0.288196	-1.16894	-0.384157	-0.288106	-1.16885	-0.384067	-0.288016	-1.16876	-0.383977	-0.287926	-1.16867	-0.383887	-0.287836	-1.16858	-0.383797	-0.287746	-1.16849	-0.383707	-0.287656
ENSG00000163472	TMEM79	1.01063	1.04841	-0.677922	-0.997906	0.461672	-0.964342	-1.11787	1.07046	0.419492	-1.47055	0.78507	-2.75357	-0.39257	-0.720058	0.655866	0.106152	-0.719968	0.655956	0.106242	-0.719878	0.656046	0.106332	-0.719788	0.656136	0.106422	-0.719698	0.656226	0.106512	-0.719608	0.656316	0.106602	-0.719518	0.656406	0.106692	-0.719428	0.656496	0.106782	-0.719338	0.656586	0.106872	-0.719248	0.656676	0.106962	-0.719158	0.656766	0.107052	-0.719068	0.656856
ENSG00000198715	GLMP	-0.0662832	1.01937	0.444559	-0.712167	1.01972	0.137746	-0.595516	2.54476	2.03497	0.500389	-0.556199	-1.58119	1.56024	0.583901	0.59086	0.0604822	0.583991	0.59095	0.0605722	0.584081	0.59104	0.0606622	0.584171	0.59113	0.0607522	0.584261	0.59122	0.0608422	0.584351	0.59131	0.0609322	0.584441	0.5914	0.0610222	0.584531	0.59149	0.0611122	0.584621	0.59158	0.0612022	0.584711	0.59167	0.0612922	0.584801	0.59176	0.0613822	0.584891	0.59185
ENSG00000116604	MEF2D	-1.23492	-0.394465	-0.698916	2.77977	1.03401	0.289576	-0.173754	-1.04524	-0.737162	-1.04873	-1.86929	0.251321	0.667246	0.406377	0.11196	-1.25525	0.406467	0.11205	-1.25516	0.406557	0.11214	-1.25507	0.406647	0.11223	-1.25498	0.406737	0.11232	-1.25489	0.406827	0.11241	-1.2548	0.406917	0.1125	-1.25471	0.407007	0.11259	-1.25462	0.407097	0.11268	-1.25453	0.407187	0.11277	-1.25444	0.407277	0.11286	-1.25435	0.407367	0.11295
ENSG00000187862	TTC24	-0.384484	-0.178863	0.682637	1.34197	0.732849	-0.185487	0.467547	-2.73958	-0.427131	-0.492331	-0.414023	1.36057	-0.758303	-1.89388	-0.318412	0.158462	-1.89379	-0.318322	0.158552	-1.8937	-0.318232	0.158642	-1.89361	-0.318142	0.158732	-1.89352	-0.318052	0.158822	-1.89343	-0.317962	0.158912	-1.89334	-0.317872	0.159002	-1.89325	-0.317782	0.159092	-1.89316	-0.317692	0.159182	-1.89307	-0.317602	0.159272	-1.89298	-0.317512	0.159362	-1.89289	-0.317422
ENSG00000143303	RRNAD1	-0.701168	1.95756	0.166502	-2.42788	0.699474	-0.892484	0.195652	1.63503	1.0657	-0.659048	0.240253	-1.03885	1.08495	0.041439	1.95743	-0.321443	0.041529	1.95752	-0.321353	0.041619	1.95761	-0.321263	0.041709	1.9577	-0.321173	0.041799	1.95779	-0.321083	0.041889	1.95788	-0.320993	0.041979	1.95797	-0.320903	0.042069	1.95806	-0.320813	0.042159	1.95815	-0.320723	0.042249	1.95824	-0.320633	0.042339	1.95833	-0.320543	0.042429	1.95842
ENSG00000143321	HDGF	-1.05629	-0.374882	-0.458591	0.218316	1.5583	0.844352	0.0665304	0.943396	-1.39134	0.69392	0.425432	1.35898	1.94575	2.84245	0.341807	0.871354	2.84254	0.341897	0.871444	2.84263	0.341987	0.871534	2.84272	0.342077	0.871624	2.84281	0.342167	0.871714	2.8429	0.342257	0.871804	2.84299	0.342347	0.871894	2.84308	0.342437	0.871984	2.84317	0.342527	0.872074	2.84326	0.342617	0.872164	2.84335	0.342707	0.872254	2.84344	0.342797
ENSG00000027869	SH2D2A	2.25631	2.19371	-0.590232	0.249297	-0.388822	0.873526	0.768695	-1.53725	-0.648528	-0.780174	0.0905969	-0.577221	-1.04611	-2.19243	-2.23937	-0.0122001	-2.19234	-2.23928	-0.0121101	-2.19225	-2.23919	-0.0120201	-2.19216	-2.2391	-0.0119301	-2.19207	-2.23901	-0.0118401	-2.19198	-2.23892	-0.0117501	-2.19189	-2.23883	-0.0116601	-2.1918	-2.23874	-0.0115701	-2.19171	-2.23865	-0.0114801	-2.19162	-2.23856	-0.0113901	-2.19153	-2.23847	-0.0113001	-2.19144	-2.23838
ENSG00000187800	PEAR1	-0.632721	0.597872	0.818181	0.206174	0.117212	-0.942521	-0.542109	-0.349866	1.08594	1.66373	0.601741	0.986482	1.09074	1.7969	2.28123	1.71492	1.79699	2.28132	1.71501	1.79708	2.28141	1.7151	1.79717	2.2815	1.71519	1.79726	2.28159	1.71528	1.79735	2.28168	1.71537	1.79744	2.28177	1.71546	1.79753	2.28186	1.71555	1.79762	2.28195	1.71564	1.79771	2.28204	1.71573	1.7978	2.28213	1.71582	1.79789	2.28222
ENSG00000132694	ARHGEF11	-1.99158	-1.61979	-1.22841	-2.28258	-0.0681151	-1.72496	-0.224474	1.44409	2.14858	0.423516	-0.235657	-0.204653	0.891913	0.93699	1.43507	0.120908	0.93708	1.43516	0.120998	0.93717	1.43525	0.121088	0.93726	1.43534	0.121178	0.93735	1.43543	0.121268	0.93744	1.43552	0.121358	0.93753	1.43561	0.121448	0.93762	1.4357	0.121538	0.93771	1.43579	0.121628	0.9378	1.43588	0.121718	0.93789	1.43597	0.121808	0.93798	1.43606
ENSG00000117036	ETV3	-0.731705	-0.237069	-0.39926	1.80121	0.668112	-0.0405919	0.120708	-1.20845	-1.41072	-0.567169	-0.678081	-0.263281	0.00999899	-1.18827	-0.980243	-0.49816	-1.18818	-0.980153	-0.49807	-1.18809	-0.980063	-0.49798	-1.188	-0.979973	-0.49789	-1.18791	-0.979883	-0.4978	-1.18782	-0.979793	-0.49771	-1.18773	-0.979703	-0.49762	-1.18764	-0.979613	-0.49753	-1.18755	-0.979523	-0.49744	-1.18746	-0.979433	-0.49735	-1.18737	-0.979343	-0.49726	-1.18728	-0.979253
ENSG00000143297	FCRL5	-0.447141	0.500147	1.43035	-0.174662	-0.0092842	0.0420089	0.395774	0.450869	1.30946	-0.247899	0.462824	2.20933	0.651645	0.465673	1.63079	-0.0356571	0.465763	1.63088	-0.0355671	0.465853	1.63097	-0.0354771	0.465943	1.63106	-0.0353871	0.466033	1.63115	-0.0352971	0.466123	1.63124	-0.0352071	0.466213	1.63133	-0.0351171	0.466303	1.63142	-0.0350271	0.466393	1.63151	-0.0349371	0.466483	1.6316	-0.0348471	0.466573	1.63169	-0.0347571	0.466663	1.63178
ENSG00000160856	FCRL3	-0.720262	-1.24168	-0.394336	-1.15664	1.3567	0.338529	0.114726	-2.43897	0.677659	-1.94494	0.0894163	1.57275	-0.371955	-1.52004	1.19254	-0.731893	-1.51995	1.19263	-0.731803	-1.51986	1.19272	-0.731713	-1.51977	1.19281	-0.731623	-1.51968	1.1929	-0.731533	-1.51959	1.19299	-0.731443	-1.5195	1.19308	-0.731353	-1.51941	1.19317	-0.731263	-1.51932	1.19326	-0.731173	-1.51923	1.19335	-0.731083	-1.51914	1.19344	-0.730993	-1.51905	1.19353
ENSG00000132704	FCRL2	-0.911572	-0.335563	-0.421759	-2.39161	0.947005	-0.746432	0.690365	-1.35958	0.112875	-0.926659	0.381149	2.89063	-0.622013	-0.646137	0.978535	-0.367217	-0.646047	0.978625	-0.367127	-0.645957	0.978715	-0.367037	-0.645867	0.978805	-0.366947	-0.645777	0.978895	-0.366857	-0.645687	0.978985	-0.366767	-0.645597	0.979075	-0.366677	-0.645507	0.979165	-0.366587	-0.645417	0.979255	-0.366497	-0.645327	0.979345	-0.366407	-0.645237	0.979435	-0.366317	-0.645147	0.979525
ENSG00000163534	FCRL1	-0.691872	-0.740006	0.423982	-1.01367	1.31684	-0.375921	-0.256794	-2.04696	-0.100199	-0.875816	0.634771	1.85787	-1.50802	-0.422848	0.106485	-0.7556	-0.422758	0.106575	-0.75551	-0.422668	0.106665	-0.75542	-0.422578	0.106755	-0.75533	-0.422488	0.106845	-0.75524	-0.422398	0.106935	-0.75515	-0.422308	0.107025	-0.75506	-0.422218	0.107115	-0.75497	-0.422128	0.107205	-0.75488	-0.422038	0.107295	-0.75479	-0.421948	0.107385	-0.7547	-0.421858	0.107475
ENSG00000158473	CD1D	-1.03065	-1.77844	-1.25944	-2.57239	-0.406209	-1.05409	-0.611563	1.49006	1.25001	-0.692947	-0.478765	-0.798828	0.82468	0.718174	0.937204	-1.16782	0.718264	0.937294	-1.16773	0.718354	0.937384	-1.16764	0.718444	0.937474	-1.16755	0.718534	0.937564	-1.16746	0.718624	0.937654	-1.16737	0.718714	0.937744	-1.16728	0.718804	0.937834	-1.16719	0.718894	0.937924	-1.1671	0.718984	0.938014	-1.16701	0.719074	0.938104	-1.16692	0.719164	0.938194
ENSG00000158477	CD1A	-0.013322	-1.9046	0.378824	-2.18988	0.173248	-0.454489	-1.13396	0.652353	-0.296449	-2.20521	-1.03057	0.229314	-0.0883699	-0.661969	-1.01151	1.451	-0.661879	-1.01142	1.45109	-0.661789	-1.01133	1.45118	-0.661699	-1.01124	1.45127	-0.661609	-1.01115	1.45136	-0.661519	-1.01106	1.45145	-0.661429	-1.01097	1.45154	-0.661339	-1.01088	1.45163	-0.661249	-1.01079	1.45172	-0.661159	-1.0107	1.45181	-0.661069	-1.01061	1.4519	-0.660979	-1.01052
ENSG00000158481	CD1C	-1.11651	-1.35859	0.88111	-0.419533	0.645237	-0.654459	0.829092	-1.78287	-2.08707	-1.342	0.422562	0.548311	0.853764	-2.75066	0.595721	-0.795034	-2.75057	0.595811	-0.794944	-2.75048	0.595901	-0.794854	-2.75039	0.595991	-0.794764	-2.7503	0.596081	-0.794674	-2.75021	0.596171	-0.794584	-2.75012	0.596261	-0.794494	-2.75003	0.596351	-0.794404	-2.74994	0.596441	-0.794314	-2.74985	0.596531	-0.794224	-2.74976	0.596621	-0.794134	-2.74967	0.596711
ENSG00000158488	CD1E	-1.23982	-1.24549	0.989981	0.537935	0.892085	0.648714	-0.198934	-0.674608	-1.56913	-1.14664	0.77914	0.321786	1.10613	-3.00121	0.485983	-1.6684	-3.00112	0.486073	-1.66831	-3.00103	0.486163	-1.66822	-3.00094	0.486253	-1.66813	-3.00085	0.486343	-1.66804	-3.00076	0.486433	-1.66795	-3.00067	0.486523	-1.66786	-3.00058	0.486613	-1.66777	-3.00049	0.486703	-1.66768	-3.0004	0.486793	-1.66759	-3.00031	0.486883	-1.6675	-3.00022	0.486973
ENSG00000163563	MNDA	0.169236	-0.288097	-0.731275	-2.90297	0.404069	-0.607851	-0.845054	2.01856	1.16003	0.59384	0.180128	-1.14815	1.22853	1.57276	0.559043	0.0613488	1.57285	0.559133	0.0614388	1.57294	0.559223	0.0615288	1.57303	0.559313	0.0616188	1.57312	0.559403	0.0617088	1.57321	0.559493	0.0617988	1.5733	0.559583	0.0618888	1.57339	0.559673	0.0619788	1.57348	0.559763	0.0620688	1.57357	0.559853	0.0621588	1.57366	0.559943	0.0622488	1.57375	0.560033
ENSG00000163564	PYHIN1	1.47443	1.1635	-0.293838	0.00577028	-0.143306	0.462487	0.868265	-1.57706	-1.04286	0.343928	0.261119	-0.311628	-1.43748	-3.05545	-2.5695	0.786104	-3.05536	-2.56941	0.786194	-3.05527	-2.56932	0.786284	-3.05518	-2.56923	0.786374	-3.05509	-2.56914	0.786464	-3.055	-2.56905	0.786554	-3.05491	-2.56896	0.786644	-3.05482	-2.56887	0.786734	-3.05473	-2.56878	0.786824	-3.05464	-2.56869	0.786914	-3.05455	-2.5686	0.787004	-3.05446	-2.56851
ENSG00000163565	IFI16	1.16956	2.97838	0.057661	-1.38564	-1.17784	0.0967747	-0.638907	1.87235	2.19104	0.672952	0.650403	-0.966106	-0.215202	-1.12794	-0.975085	0.41432	-1.12785	-0.974995	0.41441	-1.12776	-0.974905	0.4145	-1.12767	-0.974815	0.41459	-1.12758	-0.974725	0.41468	-1.12749	-0.974635	0.41477	-1.1274	-0.974545	0.41486	-1.12731	-0.974455	0.41495	-1.12722	-0.974365	0.41504	-1.12713	-0.974275	0.41513	-1.12704	-0.974185	0.41522	-1.12695	-0.974095
ENSG00000163568	AIM2	0.230696	1.61349	1.15824	-2.45553	-0.7943	0.0250119	0.318418	0.520735	1.42775	-0.385721	0.826103	1.31922	-0.21277	-1.4495	0.820275	0.190867	-1.44941	0.820365	0.190957	-1.44932	0.820455	0.191047	-1.44923	0.820545	0.191137	-1.44914	0.820635	0.191227	-1.44905	0.820725	0.191317	-1.44896	0.820815	0.191407	-1.44887	0.820905	0.191497	-1.44878	0.820995	0.191587	-1.44869	0.821085	0.191677	-1.4486	0.821175	0.191767	-1.44851	0.821265
ENSG00000179639	FCER1A	0.362212	-1.24514	0.968455	0.236757	0.370835	-0.157623	0.270533	-3.52519	-1.44807	-0.673069	-0.187182	0.188953	0.33625	-2.29353	-0.345435	-0.331762	-2.29344	-0.345345	-0.331672	-2.29335	-0.345255	-0.331582	-2.29326	-0.345165	-0.331492	-2.29317	-0.345075	-0.331402	-2.29308	-0.344985	-0.331312	-2.29299	-0.344895	-0.331222	-2.2929	-0.344805	-0.331132	-2.29281	-0.344715	-0.331042	-2.29272	-0.344625	-0.330952	-2.29263	-0.344535	-0.330862	-2.29254	-0.344445
ENSG00000181036	FCRL6	0.762459	1.3703	0.118923	-1.21313	0.308862	0.852479	1.18977	-0.559405	-0.52833	-0.33202	0.25669	-0.224932	-0.788869	-3.71546	-1.91392	0.318975	-3.71537	-1.91383	0.319065	-3.71528	-1.91374	0.319155	-3.71519	-1.91365	0.319245	-3.7151	-1.91356	0.319335	-3.71501	-1.91347	0.319425	-3.71492	-1.91338	0.319515	-3.71483	-1.91329	0.319605	-3.71474	-1.9132	0.319695	-3.71465	-1.91311	0.319785	-3.71456	-1.91302	0.319875	-3.71447	-1.91293
ENSG00000158714	SLAMF8	0.647419	0.715475	-0.764864	-1.7582	-1.08056	0.127515	0.280302	-1.68828	-1.53617	-0.300351	-0.726835	-0.168133	0.275334	0.183763	-1.54732	1.08343	0.183853	-1.54723	1.08352	0.183943	-1.54714	1.08361	0.184033	-1.54705	1.0837	0.184123	-1.54696	1.08379	0.184213	-1.54687	1.08388	0.184303	-1.54678	1.08397	0.184393	-1.54669	1.08406	0.184483	-1.5466	1.08415	0.184573	-1.54651	1.08424	0.184663	-1.54642	1.08433	0.184753	-1.54633
ENSG00000158710	TAGLN2	-0.72875	0.229627	0.152268	0.720424	0.522511	-0.158297	0.23712	0.807149	-0.188959	1.62835	-0.470216	1.19136	0.129671	2.15427	1.85273	0.914584	2.15436	1.85282	0.914674	2.15445	1.85291	0.914764	2.15454	1.853	0.914854	2.15463	1.85309	0.914944	2.15472	1.85318	0.915034	2.15481	1.85327	0.915124	2.1549	1.85336	0.915214	2.15499	1.85345	0.915304	2.15508	1.85354	0.915394	2.15517	1.85363	0.915484	2.15526	1.85372
ENSG00000085552	IGSF9	-0.647612	-0.695546	0.654832	-0.00868439	0.430723	0.96607	0.335531	1.10812	0.00195653	-0.554996	-0.920505	-0.702761	0.0348826	1.08	0.0632119	-1.84557	1.08009	0.0633019	-1.84548	1.08018	0.0633919	-1.84539	1.08027	0.0634819	-1.8453	1.08036	0.0635719	-1.84521	1.08045	0.0636619	-1.84512	1.08054	0.0637519	-1.84503	1.08063	0.0638419	-1.84494	1.08072	0.0639319	-1.84485	1.08081	0.0640219	-1.84476	1.0809	0.0641119	-1.84467	1.08099	0.0642019
ENSG00000143315	PIGM	0.755365	0.442445	1.0372	-2.76064	-0.24807	-0.434753	-0.777417	1.78073	-0.392971	0.336076	1.45839	-1.61901	0.423906	-0.00123225	-0.871019	0.944153	-0.00114225	-0.870929	0.944243	-0.00105225	-0.870839	0.944333	-0.00096225	-0.870749	0.944423	-0.00087225	-0.870659	0.944513	-0.00078225	-0.870569	0.944603	-0.00069225	-0.870479	0.944693	-0.00060225	-0.870389	0.944783	-0.00051225	-0.870299	0.944873	-0.00042225	-0.870209	0.944963	-0.00033225	-0.870119	0.945053	-0.00024225	-0.870029
ENSG00000162729	IGSF8	0.144534	2.39433	0.541483	0.849898	-0.187703	0.0685485	0.640408	-1.10408	-0.89826	-1.36158	0.450953	-0.868978	-0.783475	-1.30343	-2.09814	-0.45765	-1.30334	-2.09805	-0.45756	-1.30325	-2.09796	-0.45747	-1.30316	-2.09787	-0.45738	-1.30307	-2.09778	-0.45729	-1.30298	-2.09769	-0.4572	-1.30289	-2.0976	-0.45711	-1.3028	-2.09751	-0.45702	-1.30271	-2.09742	-0.45693	-1.30262	-2.09733	-0.45684	-1.30253	-2.09724	-0.45675	-1.30244	-2.09715
ENSG00000162734	PEA15	-0.862608	-0.988304	-0.644858	-0.740339	1.2093	0.0670993	-0.286724	-0.369105	-3.27881	-0.619776	-0.680715	0.209088	1.00509	-1.64036	-0.0818314	-0.910216	-1.64027	-0.0817414	-0.910126	-1.64018	-0.0816514	-0.910036	-1.64009	-0.0815614	-0.909946	-1.64	-0.0814714	-0.909856	-1.63991	-0.0813814	-0.909766	-1.63982	-0.0812914	-0.909676	-1.63973	-0.0812014	-0.909586	-1.63964	-0.0811114	-0.909496	-1.63955	-0.0810214	-0.909406	-1.63946	-0.0809314	-0.909316	-1.63937	-0.0808414
ENSG00000132716	DCAF8	-2.12041	-1.47434	-0.388995	0.557774	0.096454	-1.9485	-0.342031	-0.96238	-1.74545	-0.246373	0.757253	0.729152	-1.024	-1.25042	-0.71889	-0.0554153	-1.25033	-0.7188	-0.0553253	-1.25024	-0.71871	-0.0552353	-1.25015	-0.71862	-0.0551453	-1.25006	-0.71853	-0.0550553	-1.24997	-0.71844	-0.0549653	-1.24988	-0.71835	-0.0548753	-1.24979	-0.71826	-0.0547853	-1.2497	-0.71817	-0.0546953	-1.24961	-0.71808	-0.0546053	-1.24952	-0.71799	-0.0545153	-1.24943	-0.7179
ENSG00000228606	LOC100287049	-1.70431	0.910615	-0.941946	1.85366	1.06954	-0.802228	0.330543	-1.29747	0.148453	0.44315	-1.19429	1.80487	-0.269853	-0.320542	-1.75706	-1.91532	-0.320452	-1.75697	-1.91523	-0.320362	-1.75688	-1.91514	-0.320272	-1.75679	-1.91505	-0.320182	-1.7567	-1.91496	-0.320092	-1.75661	-1.91487	-0.320002	-1.75652	-1.91478	-0.319912	-1.75643	-1.91469	-0.319822	-1.75634	-1.9146	-0.319732	-1.75625	-1.91451	-0.319642	-1.75616	-1.91442	-0.319552	-1.75607
ENSG00000122218	COPA	-2.35562	-2.65408	-0.0869748	-1.27453	0.586543	0.103932	-0.0379082	2.41444	1.73889	0.0522331	-0.530727	-0.458581	1.75003	1.01044	-0.185232	-0.617199	1.01053	-0.185142	-0.617109	1.01062	-0.185052	-0.617019	1.01071	-0.184962	-0.616929	1.0108	-0.184872	-0.616839	1.01089	-0.184782	-0.616749	1.01098	-0.184692	-0.616659	1.01107	-0.184602	-0.616569	1.01116	-0.184512	-0.616479	1.01125	-0.184422	-0.616389	1.01134	-0.184332	-0.616299	1.01143	-0.184242
ENSG00000162736	NCSTN	-1.52953	0.199285	-1.21643	-2.19129	0.760399	-0.20013	-0.26363	2.42109	2.36931	0.132218	-0.82353	0.197596	1.59949	1.35997	0.438221	-0.666735	1.36006	0.438311	-0.666645	1.36015	0.438401	-0.666555	1.36024	0.438491	-0.666465	1.36033	0.438581	-0.666375	1.36042	0.438671	-0.666285	1.36051	0.438761	-0.666195	1.3606	0.438851	-0.666105	1.36069	0.438941	-0.666015	1.36078	0.439031	-0.665925	1.36087	0.439121	-0.665835	1.36096	0.439211
ENSG00000162739	SLAMF6	1.29598	1.66237	0.175953	-0.58526	-0.714617	0.19157	0.623451	-1.41592	-0.329045	-0.029812	0.595301	0.053265	-1.03657	-2.96577	-2.05281	1.18637	-2.96568	-2.05272	1.18646	-2.96559	-2.05263	1.18655	-2.9655	-2.05254	1.18664	-2.96541	-2.05245	1.18673	-2.96532	-2.05236	1.18682	-2.96523	-2.05227	1.18691	-2.96514	-2.05218	1.187	-2.96505	-2.05209	1.18709	-2.96496	-2.052	1.18718	-2.96487	-2.05191	1.18727	-2.96478	-2.05182
ENSG00000117090	SLAMF1	1.14328	0.0923167	0.825955	0.729668	-1.5624	-0.680689	-0.477488	-1.86423	-1.84723	-0.598159	0.755519	0.240044	-1.08231	-1.72937	-2.19526	0.276834	-1.72928	-2.19517	0.276924	-1.72919	-2.19508	0.277014	-1.7291	-2.19499	0.277104	-1.72901	-2.1949	0.277194	-1.72892	-2.19481	0.277284	-1.72883	-2.19472	0.277374	-1.72874	-2.19463	0.277464	-1.72865	-2.19454	0.277554	-1.72856	-2.19445	0.277644	-1.72847	-2.19436	0.277734	-1.72838	-2.19427
ENSG00000117091	CD48	1.2357	2.88554	-0.498139	-2.26657	-0.0409771	-0.885234	-0.482395	0.613516	0.982742	-0.0692422	0.409133	-2.86369	0.711496	0.248724	-0.592411	0.408261	0.248814	-0.592321	0.408351	0.248904	-0.592231	0.408441	0.248994	-0.592141	0.408531	0.249084	-0.592051	0.408621	0.249174	-0.591961	0.408711	0.249264	-0.591871	0.408801	0.249354	-0.591781	0.408891	0.249444	-0.591691	0.408981	0.249534	-0.591601	0.409071	0.249624	-0.591511	0.409161	0.249714	-0.591421
ENSG00000026751	SLAMF7	1.01128	2.0986	2.37855	-0.0204966	-0.239455	1.43462	1.33232	0.335012	0.444033	-0.0914524	0.320482	-1.19071	-0.0482402	-1.9067	-0.597187	0.492714	-1.90661	-0.597097	0.492804	-1.90652	-0.597007	0.492894	-1.90643	-0.596917	0.492984	-1.90634	-0.596827	0.493074	-1.90625	-0.596737	0.493164	-1.90616	-0.596647	0.493254	-1.90607	-0.596557	0.493344	-1.90598	-0.596467	0.493434	-1.90589	-0.596377	0.493524	-1.9058	-0.596287	0.493614	-1.90571	-0.596197
ENSG00000122224	LY9	0.537704	0.937053	-0.143053	0.137635	-0.801244	-1.0197	0.265474	-2.80445	-1.03376	-1.54989	0.367062	0.376149	-1.34062	-1.89722	-1.43792	-0.191277	-1.89713	-1.43783	-0.191187	-1.89704	-1.43774	-0.191097	-1.89695	-1.43765	-0.191007	-1.89686	-1.43756	-0.190917	-1.89677	-1.43747	-0.190827	-1.89668	-1.43738	-0.190737	-1.89659	-1.43729	-0.190647	-1.8965	-1.4372	-0.190557	-1.89641	-1.43711	-0.190467	-1.89632	-1.43702	-0.190377	-1.89623	-1.43693
ENSG00000122223	CD244	-0.493989	-0.119885	-0.735628	-2.71453	0.960108	0.80184	-0.0956729	-1.48591	-1.07222	-0.265649	-0.17978	-0.358215	0.118571	-1.58376	-1.88114	0.310956	-1.58367	-1.88105	0.311046	-1.58358	-1.88096	0.311136	-1.58349	-1.88087	0.311226	-1.5834	-1.88078	0.311316	-1.58331	-1.88069	0.311406	-1.58322	-1.8806	0.311496	-1.58313	-1.88051	0.311586	-1.58304	-1.88042	0.311676	-1.58295	-1.88033	0.311766	-1.58286	-1.88024	0.311856	-1.58277	-1.88015
ENSG00000179914	ITLN1	0.243924	-1.43733	-0.282986	0.0936912	1.43434	0.468028	1.09108	-0.366874	-3.98086	-0.198502	0.783023	0.917096	-0.57146	-1.5641	0.623841	0.532117	-1.56401	0.623931	0.532207	-1.56392	0.624021	0.532297	-1.56383	0.624111	0.532387	-1.56374	0.624201	0.532477	-1.56365	0.624291	0.532567	-1.56356	0.624381	0.532657	-1.56347	0.624471	0.532747	-1.56338	0.624561	0.532837	-1.56329	0.624651	0.532927	-1.5632	0.624741	0.533017	-1.56311	0.624831
ENSG00000158769	F11R	-2.31972	-1.12692	-1.2757	-1.06348	0.0311124	-0.445089	-1.46311	0.703998	0.839569	0.636872	-0.154169	-0.358176	0.278449	-0.694311	1.85105	0.494313	-0.694221	1.85114	0.494403	-0.694131	1.85123	0.494493	-0.694041	1.85132	0.494583	-0.693951	1.85141	0.494673	-0.693861	1.8515	0.494763	-0.693771	1.85159	0.494853	-0.693681	1.85168	0.494943	-0.693591	1.85177	0.495033	-0.693501	1.85186	0.495123	-0.693411	1.85195	0.495213	-0.693321	1.85204
ENSG00000215845	TSTD1	0.974873	1.63881	-0.124379	0.143253	-0.128115	-0.646201	0.21366	-3.75152	-0.883158	-0.677306	0.314803	1.2904	-0.933799	-0.959195	-1.23097	0.11402	-0.959105	-1.23088	0.11411	-0.959015	-1.23079	0.1142	-0.958925	-1.2307	0.11429	-0.958835	-1.23061	0.11438	-0.958745	-1.23052	0.11447	-0.958655	-1.23043	0.11456	-0.958565	-1.23034	0.11465	-0.958475	-1.23025	0.11474	-0.958385	-1.23016	0.11483	-0.958295	-1.23007	0.11492	-0.958205	-1.22998
ENSG00000158773	USF1	-1.23093	1.87685	-0.00448018	-0.522983	1.97074	-1.14385	-0.869016	-0.974101	-0.28018	0.0573476	-0.168349	-0.250334	-0.900591	-1.45079	0.692726	0.170706	-1.4507	0.692816	0.170796	-1.45061	0.692906	0.170886	-1.45052	0.692996	0.170976	-1.45043	0.693086	0.171066	-1.45034	0.693176	0.171156	-1.45025	0.693266	0.171246	-1.45016	0.693356	0.171336	-1.45007	0.693446	0.171426	-1.44998	0.693536	0.171516	-1.44989	0.693626	0.171606	-1.4498	0.693716
ENSG00000186517	ARHGAP30	-2.19968	-2.00009	-1.21867	-1.8784	0.32387	-0.730495	0.357938	0.865714	0.491055	-0.476422	-0.415833	-0.507283	0.414001	-1.19625	-0.442847	-0.701153	-1.19616	-0.442757	-0.701063	-1.19607	-0.442667	-0.700973	-1.19598	-0.442577	-0.700883	-1.19589	-0.442487	-0.700793	-1.1958	-0.442397	-0.700703	-1.19571	-0.442307	-0.700613	-1.19562	-0.442217	-0.700523	-1.19553	-0.442127	-0.700433	-1.19544	-0.442037	-0.700343	-1.19535	-0.441947	-0.700253	-1.19526	-0.441857
ENSG00000158793	NIT1	0.0957468	0.129184	-0.433148	-2.01632	-0.463494	-0.630419	-0.0441082	1.37377	0.357455	-0.364501	0.0101966	-1.102	0.35474	-0.568144	1.41309	0.905707	-0.568054	1.41318	0.905797	-0.567964	1.41327	0.905887	-0.567874	1.41336	0.905977	-0.567784	1.41345	0.906067	-0.567694	1.41354	0.906157	-0.567604	1.41363	0.906247	-0.567514	1.41372	0.906337	-0.567424	1.41381	0.906427	-0.567334	1.4139	0.906517	-0.567244	1.41399	0.906607	-0.567154	1.41408
ENSG00000143224	PPOX	0.230996	0.936185	1.2818	1.44179	-0.802671	0.458421	0.417776	-1.10165	-0.265824	-0.461479	0.18628	0.538401	-0.653934	-3.36618	-1.81952	0.202209	-3.36609	-1.81943	0.202299	-3.366	-1.81934	0.202389	-3.36591	-1.81925	0.202479	-3.36582	-1.81916	0.202569	-3.36573	-1.81907	0.202659	-3.36564	-1.81898	0.202749	-3.36555	-1.81889	0.202839	-3.36546	-1.8188	0.202929	-3.36537	-1.81871	0.203019	-3.36528	-1.81862	0.203109	-3.36519	-1.81853
ENSG00000158869	FCER1G	0.194713	0.156008	-0.996184	-2.38996	1.22622	0.76986	-0.401249	1.72554	0.913649	1.2209	-0.0524634	-0.393513	1.43531	1.89468	1.38818	0.523335	1.89477	1.38827	0.523425	1.89486	1.38836	0.523515	1.89495	1.38845	0.523605	1.89504	1.38854	0.523695	1.89513	1.38863	0.523785	1.89522	1.38872	0.523875	1.89531	1.38881	0.523965	1.8954	1.3889	0.524055	1.89549	1.38899	0.524145	1.89558	1.38908	0.524235	1.89567	1.38917
ENSG00000158882	TOMM40L	-0.883855	-0.440341	0.569116	-0.416972	1.28953	1.26758	0.124385	-0.0796155	-0.414034	1.32935	-0.735793	1.10181	1.41525	1.13504	2.03748	1.21574	1.13513	2.03757	1.21583	1.13522	2.03766	1.21592	1.13531	2.03775	1.21601	1.1354	2.03784	1.2161	1.13549	2.03793	1.21619	1.13558	2.03802	1.21628	1.13567	2.03811	1.21637	1.13576	2.0382	1.21646	1.13585	2.03829	1.21655	1.13594	2.03838	1.21664	1.13603	2.03847
ENSG00000143252	SDHC	-0.447265	0.382802	-0.820335	-1.06908	1.01703	0.687924	0.0103711	0.262386	1.98243	1.03278	0.628213	-1.1895	2.19411	2.68654	-0.253718	-0.0445359	2.68663	-0.253628	-0.0444459	2.68672	-0.253538	-0.0443559	2.68681	-0.253448	-0.0442659	2.6869	-0.253358	-0.0441759	2.68699	-0.253268	-0.0440859	2.68708	-0.253178	-0.0439959	2.68717	-0.253088	-0.0439059	2.68726	-0.252998	-0.0438159	2.68735	-0.252908	-0.0437259	2.68744	-0.252818	-0.0436359	2.68753	-0.252728
ENSG00000283696	NA	-0.205759	1.23419	-0.601716	-1.27507	1.04856	0.27691	-1.27137	-0.422762	-0.308923	-0.775943	0.316167	0.725899	-1.91805	-3.00641	-1.42201	-0.0260966	-3.00632	-1.42192	-0.0260066	-3.00623	-1.42183	-0.0259166	-3.00614	-1.42174	-0.0258266	-3.00605	-1.42165	-0.0257366	-3.00596	-1.42156	-0.0256466	-3.00587	-1.42147	-0.0255566	-3.00578	-1.42138	-0.0254666	-3.00569	-1.42129	-0.0253766	-3.0056	-1.4212	-0.0252866	-3.00551	-1.42111	-0.0251966	-3.00542	-1.42102
ENSG00000288093	NA	0.519155	1.77931	-0.201505	-0.0383094	0.899067	-2.68065	-0.73458	0.391119	-0.0507823	0.393051	-0.109838	2.47603	-0.277309	-2.64945	-0.160926	-0.431533	-2.64936	-0.160836	-0.431443	-2.64927	-0.160746	-0.431353	-2.64918	-0.160656	-0.431263	-2.64909	-0.160566	-0.431173	-2.649	-0.160476	-0.431083	-2.64891	-0.160386	-0.430993	-2.64882	-0.160296	-0.430903	-2.64873	-0.160206	-0.430813	-2.64864	-0.160116	-0.430723	-2.64855	-0.160026	-0.430633	-2.64846	-0.159936
ENSG00000143226	FCGR2A	-0.323188	-1.26634	-1.778	-2.72208	0.646187	-0.385096	-0.631141	2.56289	1.00727	0.672964	-1.29412	-0.344037	0.82761	1.41161	0.930877	-0.13448	1.4117	0.930967	-0.13439	1.41179	0.931057	-0.1343	1.41188	0.931147	-0.13421	1.41197	0.931237	-0.13412	1.41206	0.931327	-0.13403	1.41215	0.931417	-0.13394	1.41224	0.931507	-0.13385	1.41233	0.931597	-0.13376	1.41242	0.931687	-0.13367	1.41251	0.931777	-0.13358	1.4126	0.931867
ENSG00000173110	HSPA6	0.0116131	-0.0647603	-0.507649	2.99662	-1.35567	-1.47126	-1.29388	0.733668	0.363018	-0.808085	-0.095998	-1.50688	-1.98383	-0.876725	-0.166786	-0.471769	-0.876635	-0.166696	-0.471679	-0.876545	-0.166606	-0.471589	-0.876455	-0.166516	-0.471499	-0.876365	-0.166426	-0.471409	-0.876275	-0.166336	-0.471319	-0.876185	-0.166246	-0.471229	-0.876095	-0.166156	-0.471139	-0.876005	-0.166066	-0.471049	-0.875915	-0.165976	-0.470959	-0.875825	-0.165886	-0.470869	-0.875735	-0.165796
ENSG00000203747	FCGR3A	-0.0830881	0.21891	-0.326894	-2.3148	0.652591	0.431096	0.474889	0.406764	-1.31326	-0.297702	-0.079276	-0.469944	-0.312661	-4.01949	0.539631	0.145882	-4.0194	0.539721	0.145972	-4.01931	0.539811	0.146062	-4.01922	0.539901	0.146152	-4.01913	0.539991	0.146242	-4.01904	0.540081	0.146332	-4.01895	0.540171	0.146422	-4.01886	0.540261	0.146512	-4.01877	0.540351	0.146602	-4.01868	0.540441	0.146692	-4.01859	0.540531	0.146782	-4.0185	0.540621
ENSG00000244682	NA	-0.473899	-0.326563	0.881912	-0.977017	0.173246	-0.620921	0.171924	0.482181	-2.9831	0.0988173	-2.10367	0.291096	-0.632635	-1.39075	-1.06573	0.168474	-1.39066	-1.06564	0.168564	-1.39057	-1.06555	0.168654	-1.39048	-1.06546	0.168744	-1.39039	-1.06537	0.168834	-1.3903	-1.06528	0.168924	-1.39021	-1.06519	0.169014	-1.39012	-1.0651	0.169104	-1.39003	-1.06501	0.169194	-1.38994	-1.06492	0.169284	-1.38985	-1.06483	0.169374	-1.38976	-1.06474
ENSG00000225217	NA	1.26657	-0.783158	-0.145851	-1.5108	0.866551	-0.626127	0.480166	-0.254217	-1.85415	0.0983132	-0.832083	-0.0525752	-0.31436	-2.7285	0.0625269	0.828414	-2.72841	0.0626169	0.828504	-2.72832	0.0627069	0.828594	-2.72823	0.0627969	0.828684	-2.72814	0.0628869	0.828774	-2.72805	0.0629769	0.828864	-2.72796	0.0630669	0.828954	-2.72787	0.0631569	0.829044	-2.72778	0.0632469	0.829134	-2.72769	0.0633369	0.829224	-2.7276	0.0634269	0.829314	-2.72751	0.0635169
ENSG00000162747	FCGR3B	-0.117614	2.00249	-0.486484	-0.334601	0.855328	-0.0318094	-0.0661713	1.3259	0.208138	0.41105	-0.436415	0.0518434	0.2751	2.34416	0.807738	0.393235	2.34425	0.807828	0.393325	2.34434	0.807918	0.393415	2.34443	0.808008	0.393505	2.34452	0.808098	0.393595	2.34461	0.808188	0.393685	2.3447	0.808278	0.393775	2.34479	0.808368	0.393865	2.34488	0.808458	0.393955	2.34497	0.808548	0.394045	2.34506	0.808638	0.394135	2.34515	0.808728
ENSG00000072694	FCGR2B	-1.0669	0.189621	0.748188	-1.76233	0.522761	-1.03739	0.153144	-0.0426645	0.576706	-0.367118	-0.720397	2.73704	-0.588486	-0.167721	2.25192	-0.322329	-0.167631	2.25201	-0.322239	-0.167541	2.2521	-0.322149	-0.167451	2.25219	-0.322059	-0.167361	2.25228	-0.321969	-0.167271	2.25237	-0.321879	-0.167181	2.25246	-0.321789	-0.167091	2.25255	-0.321699	-0.167001	2.25264	-0.321609	-0.166911	2.25273	-0.321519	-0.166821	2.25282	-0.321429	-0.166731	2.25291
ENSG00000132185	FCRLA	-1.49594	-0.0179654	0.0292791	-1.83987	1.08042	-0.939502	-0.098768	-1.52188	1.06536	-0.600055	-0.161345	1.98603	-0.547674	-0.77928	1.73376	-0.120082	-0.77919	1.73385	-0.119992	-0.7791	1.73394	-0.119902	-0.77901	1.73403	-0.119812	-0.77892	1.73412	-0.119722	-0.77883	1.73421	-0.119632	-0.77874	1.7343	-0.119542	-0.77865	1.73439	-0.119452	-0.77856	1.73448	-0.119362	-0.77847	1.73457	-0.119272	-0.77838	1.73466	-0.119182	-0.77829	1.73475
ENSG00000162746	FCRLB	0.857951	0.35829	-0.199233	-2.06898	-0.065088	-0.00551936	0.436455	-0.966717	-0.694355	-0.425512	0.131477	0.905158	0.157419	-0.862356	-0.621371	0.5486	-0.862266	-0.621281	0.54869	-0.862176	-0.621191	0.54878	-0.862086	-0.621101	0.54887	-0.861996	-0.621011	0.54896	-0.861906	-0.620921	0.54905	-0.861816	-0.620831	0.54914	-0.861726	-0.620741	0.54923	-0.861636	-0.620651	0.54932	-0.861546	-0.620561	0.54941	-0.861456	-0.620471	0.5495	-0.861366	-0.620381
ENSG00000081721	DUSP12	1.58321	1.52546	0.538493	-0.408148	0.33374	2.07344	1.05875	0.812442	0.929161	0.707883	0.469669	0.625047	0.579698	0.530139	-1.79331	-0.286525	0.530229	-1.79322	-0.286435	0.530319	-1.79313	-0.286345	0.530409	-1.79304	-0.286255	0.530499	-1.79295	-0.286165	0.530589	-1.79286	-0.286075	0.530679	-1.79277	-0.285985	0.530769	-1.79268	-0.285895	0.530859	-1.79259	-0.285805	0.530949	-1.7925	-0.285715	0.531039	-1.79241	-0.285625	0.531129	-1.79232
ENSG00000162745	OLFML2B	-1.15355	-0.406855	-0.657739	-1.08025	0.98894	-0.0896723	0.322893	1.95821	1.12558	-0.32158	-0.837817	0.908791	2.23977	-0.361655	1.97227	0.442854	-0.361565	1.97236	0.442944	-0.361475	1.97245	0.443034	-0.361385	1.97254	0.443124	-0.361295	1.97263	0.443214	-0.361205	1.97272	0.443304	-0.361115	1.97281	0.443394	-0.361025	1.9729	0.443484	-0.360935	1.97299	0.443574	-0.360845	1.97308	0.443664	-0.360755	1.97317	0.443754	-0.360665	1.97326
ENSG00000198574	SH2D1B	0.297874	0.00625625	-1.70342	-1.04254	0.421378	0.994757	-0.0729768	-0.433577	-0.380622	-1.02966	0.579757	0.299587	-0.8086	-2.54793	-1.59449	-0.53469	-2.54784	-1.5944	-0.5346	-2.54775	-1.59431	-0.53451	-2.54766	-1.59422	-0.53442	-2.54757	-1.59413	-0.53433	-2.54748	-1.59404	-0.53424	-2.54739	-1.59395	-0.53415	-2.5473	-1.59386	-0.53406	-2.54721	-1.59377	-0.53397	-2.54712	-1.59368	-0.53388	-2.54703	-1.59359	-0.53379	-2.54694	-1.5935
ENSG00000152332	UHMK1	0.0253724	-0.583269	-0.311657	-0.426164	0.023779	0.493029	1.62669	-0.183406	1.63003	0.148323	-0.0792557	-0.0983696	-0.655775	-2.55361	-1.42696	-0.668341	-2.55352	-1.42687	-0.668251	-2.55343	-1.42678	-0.668161	-2.55334	-1.42669	-0.668071	-2.55325	-1.4266	-0.667981	-2.55316	-1.42651	-0.667891	-2.55307	-1.42642	-0.667801	-2.55298	-1.42633	-0.667711	-2.55289	-1.42624	-0.667621	-2.5528	-1.42615	-0.667531	-2.55271	-1.42606	-0.667441	-2.55262	-1.42597
ENSG00000117143	UAP1	0.335454	-0.0338551	1.62621	1.79849	-0.368531	1.47809	0.837661	0.647363	0.68094	0.115958	-0.00323327	-0.648203	-0.164818	0.00175938	-1.2178	-0.0321148	0.00184938	-1.21771	-0.0320248	0.00193938	-1.21762	-0.0319348	0.00202938	-1.21753	-0.0318448	0.00211938	-1.21744	-0.0317548	0.00220938	-1.21735	-0.0316648	0.00229938	-1.21726	-0.0315748	0.00238938	-1.21717	-0.0314848	0.00247938	-1.21708	-0.0313948	0.00256938	-1.21699	-0.0313048	0.00265938	-1.2169	-0.0312148	0.00274938	-1.21681
ENSG00000143228	NUF2	0.853987	0.340392	1.74004	0.790621	0.578832	1.83731	0.425145	0.82816	0.820972	1.51334	1.42653	0.0496496	1.14132	1.02047	-0.0350129	1.05976	1.02056	-0.0349229	1.05985	1.02065	-0.0348329	1.05994	1.02074	-0.0347429	1.06003	1.02083	-0.0346529	1.06012	1.02092	-0.0345629	1.06021	1.02101	-0.0344729	1.0603	1.0211	-0.0343829	1.06039	1.02119	-0.0342929	1.06048	1.02128	-0.0342029	1.06057	1.02137	-0.0341129	1.06066	1.02146	-0.0340229
ENSG00000185630	PBX1	-1.26085	0.251934	1.21402	0.0867205	-0.035707	-1.25003	-0.877653	-0.125453	0.506624	1.08453	1.28327	1.20918	0.336038	1.92769	2.54081	1.34964	1.92778	2.5409	1.34973	1.92787	2.54099	1.34982	1.92796	2.54108	1.34991	1.92805	2.54117	1.35	1.92814	2.54126	1.35009	1.92823	2.54135	1.35018	1.92832	2.54144	1.35027	1.92841	2.54153	1.35036	1.9285	2.54162	1.35045	1.92859	2.54171	1.35054	1.92868	2.5418
ENSG00000143198	MGST3	0.619048	1.84726	-1.69634	-0.7847	0.571462	-0.198556	0.563073	1.27912	1.65002	0.649688	0.09862	-0.878423	2.13195	1.7429	0.753667	-0.407534	1.74299	0.753757	-0.407444	1.74308	0.753847	-0.407354	1.74317	0.753937	-0.407264	1.74326	0.754027	-0.407174	1.74335	0.754117	-0.407084	1.74344	0.754207	-0.406994	1.74353	0.754297	-0.406904	1.74362	0.754387	-0.406814	1.74371	0.754477	-0.406724	1.7438	0.754567	-0.406634	1.74389	0.754657
[truncated: 10,804 more rows]
[truncated: 22 more columns]

## Sheet: Healthy 
Supplementary Table 2: Normalized and filtered gene expression matrix of healthy samples
Gene_id	Symbol	Healthy_01	Healthy_02	Healthy_03	Healthy_04	Healthy_05	Healthy_06	Healthy_07	Healthy_08	Healthy_09	Healthy_10	Healthy_11	Healthy_12	Healthy_13	Healthy_14	Healthy_15	Healthy_16	Healthy_17
[truncated: 11,655 more rows]
