# Supplementary material for: Differential Co-Expression Network Analysis Reveals Key Hub-High Traffic Genes as Potential Therapeutic Targets for COVID-19 Pandemic
Source: Front Immunol. 2021 Dec 15;12:789317. doi: 10.3389/fimmu.2021.789317 (PMC8714803; doi:10.3389/fimmu.2021.789317)
Supplement: Supplementary file 4 [file Table_3.xlsx]

## Sheet: Modules
Supplementary Table 3: Complete information of the modules
Gene_id	Symbol	Module_label	Module_color						Module	Module_size
ENSG00000187961	KLHL17	7	black						salmon	192
ENSG00000131591	C1orf159	7	black						cyan	181
ENSG00000186827	TNFRSF4	7	black						green	769
ENSG00000131584	ACAP3	7	black						tan	198
ENSG00000160072	ATAD3B	7	black						lightcyan	161
ENSG00000067606	PRKCZ	7	black						magenta	542
ENSG00000116151	MORN1	7	black						greenyellow	290
ENSG00000149527	PLCH2	7	black						grey60	140
ENSG00000158109	TPRG1L	7	black						pink	592
ENSG00000215788	TNFRSF25	7	black						brown	991
ENSG00000188807	TMEM201	7	black						lightyellow	120
ENSG00000142655	PEX14	7	black						lightgreen	137
ENSG00000132879	FBXO44	7	black						darkred	93
ENSG00000080947	CROCCP3	7	black						yellow	889
ENSG00000215908	CROCCP2	7	black						midnightblue	170
ENSG00000142784	WDTC1	7	black						red	743
ENSG00000142765	SYTL1	7	black						purple	459
ENSG00000158195	WASF2	7	black						royalblue	104
ENSG00000126705	AHDC1	7	black						black	643
ENSG00000121753	ADGRB2	7	black						blue	1776
ENSG00000116525	TRIM62	7	black						turquoise	1818
ENSG00000116871	MAP7D1	7	black						grey	647
ENSG00000164008	C1orf50	7	black
ENSG00000198198	SZT2	7	black
ENSG00000126091	ST3GAL3	7	black
ENSG00000159588	CCDC17	7	black
ENSG00000182183	SHISAL2A	7	black
ENSG00000121310	ECHDC2	7	black
ENSG00000240563	L1TD1	7	black
ENSG00000223896	NA	7	black
ENSG00000162650	ATXN7L2	7	black
ENSG00000155363	MOV10	7	black
ENSG00000231365	WARS2-AS1	7	black
ENSG00000226015	CCT8P1	7	black
ENSG00000184260	H2AC20	7	black
ENSG00000143443	C1orf56	7	black
ENSG00000143614	GATAD2B	7	black
ENSG00000198837	DENND4B	7	black
ENSG00000163462	TRIM46	7	black
ENSG00000160767	FAM189B	7	black
ENSG00000143630	HCN3	7	black
ENSG00000215845	TSTD1	7	black
ENSG00000236278	NA	7	black
ENSG00000170128	GPR25	7	black
ENSG00000143862	ARL8A	7	black
ENSG00000263528	IKBKE	7	black
ENSG00000054392	HHAT	7	black
ENSG00000162769	FLVCR1	7	black
ENSG00000143811	PYCR2	7	black
ENSG00000163050	COQ8A	7	black
ENSG00000081692	JMJD4	7	black
ENSG00000154370	TRIM11	7	black
ENSG00000171163	ZNF692	7	black
ENSG00000071575	TRIB2	7	black
ENSG00000163794	UCN	7	black
ENSG00000157992	KRTCAP3	7	black
ENSG00000223522	LOC100505716	7	black
ENSG00000162959	MEMO1	7	black
ENSG00000276334	NA	7	black
ENSG00000227028	SLC8A1-AS1	7	black
ENSG00000095002	MSH2	7	black
ENSG00000173209	AHSA2P	7	black
ENSG00000011523	CEP68	7	black
ENSG00000135632	SMYD5	7	black
ENSG00000135622	SEMA4F	7	black
ENSG00000251039	IGKV2D-40	7	black
ENSG00000168758	SEMA4C	7	black
ENSG00000144199	FAHD2B	7	black
ENSG00000115085	ZAP70	7	black
ENSG00000173272	MZT2A	7	black
ENSG00000228655	NA	7	black
ENSG00000257277	NA	7	black
ENSG00000123989	CHPF	7	black
ENSG00000114923	SLC4A3	7	black
ENSG00000196811	CHRNG	7	black
ENSG00000168395	ING5	7	black
ENSG00000180902	D2HGDH	7	black
ENSG00000188389	PDCD1	7	black
ENSG00000163704	PRRT3	7	black
ENSG00000154767	XPC	7	black
ENSG00000008226	DLEC1	7	black
ENSG00000168026	TTC21A	7	black
ENSG00000280739	EIF1B-AS1	7	black
ENSG00000160796	NBEAL2	7	black
ENSG00000076201	PTPN23	7	black
ENSG00000178252	WDR6	7	black
ENSG00000185614	INKA1	7	black
ENSG00000243477	NAA80	7	black
ENSG00000114388	NPRL2	7	black
ENSG00000088543	C3orf18	7	black
ENSG00000114735	HEMK1	7	black
ENSG00000088538	DOCK3	7	black
ENSG00000114841	DNAH1	7	black
ENSG00000163687	DNASE1L3	7	black
ENSG00000144749	LRIG1	7	black
ENSG00000286699	NA	7	black
ENSG00000070087	PFN2	7	black
ENSG00000061938	TNK2	7	black
ENSG00000185485	SDHAP1	7	black
ENSG00000161267	BDH1	7	black
ENSG00000127419	TMEM175	7	black
ENSG00000127415	IDUA	7	black
ENSG00000175920	DOK7	7	black
ENSG00000109501	WFS1	7	black
ENSG00000163995	ABLIM2	7	black
ENSG00000263327	TAPT1-AS1	7	black
ENSG00000281501	NA	7	black
ENSG00000286035	NA	7	black
ENSG00000172493	AFF1	7	black
ENSG00000225138	NA	7	black
ENSG00000154122	ANKH	7	black
ENSG00000043143	JADE2	7	black
ENSG00000185129	PURA	7	black
ENSG00000164620	RELL2	7	black
ENSG00000145901	TNIP1	7	black
ENSG00000146083	RNF44	7	black
ENSG00000169220	RGS14	7	black
ENSG00000146067	FAM193B	7	black
ENSG00000175309	PHYKPL	7	black
ENSG00000219712	LOC100421511	7	black
ENSG00000220517	ASS1P1	7	black
ENSG00000241549	GUSBP2	7	black
ENSG00000274997	H2AC12	7	black
ENSG00000276368	H2AC14	7	black
ENSG00000280128	NA	7	black
ENSG00000227507	LTB	7	black
ENSG00000204469	PRRC2A	7	black
ENSG00000204463	BAG6	7	black
ENSG00000240053	LY6G5B	7	black
ENSG00000204371	EHMT2	7	black
ENSG00000213676	ATF6B	7	black
ENSG00000213654	GPSM3	7	black
ENSG00000204231	RXRB	7	black
ENSG00000237441	RGL2	7	black
ENSG00000065029	ZNF76	7	black
ENSG00000112033	PPARD	7	black
ENSG00000146192	FGD2	7	black
ENSG00000137200	CMTR1	7	black
ENSG00000124701	APOBEC2	7	black
ENSG00000137166	FOXP4	7	black
ENSG00000137171	KLC4	7	black
ENSG00000112659	CUL9	7	black
ENSG00000137216	TMEM63B	7	black
ENSG00000235652	FBXO30-DT	7	black
ENSG00000278899	LOC645967	7	black
ENSG00000218596	NA	7	black
ENSG00000164818	DNAAF5	7	black
ENSG00000164880	INTS1	7	black
ENSG00000235944	NA	7	black
ENSG00000106443	PHF14	7	black
ENSG00000065883	CDK13	7	black
ENSG00000228903	NA	7	black
ENSG00000122678	POLM	7	black
ENSG00000122515	ZMIZ2	7	black
ENSG00000273142	NA	7	black
ENSG00000174353	TRIM74	7	black
ENSG00000277072	NA	7	black
ENSG00000127957	PMS2P3	7	black
ENSG00000091073	DTX2	7	black
ENSG00000205356	TECPR1	7	black
ENSG00000197037	ZSCAN25	7	black
ENSG00000214309	MBLAC1	7	black
ENSG00000146826	MAP11	7	black
ENSG00000214300	SPDYE3	7	black
ENSG00000166925	TSC22D4	7	black
ENSG00000274272	NA	7	black
ENSG00000106330	MOSPD3	7	black
ENSG00000169871	TRIM56	7	black
ENSG00000106404	CLDN15	7	black
ENSG00000161036	LRWD1	7	black
ENSG00000243679	NA	7	black
ENSG00000273329	NA	7	black
ENSG00000273319	NA	7	black
ENSG00000253409	TRBV7-4	7	black
ENSG00000211727	TRBV7-6	7	black
ENSG00000211751	TRBC1	7	black
ENSG00000211767	TRBJ2-3	7	black
ENSG00000170265	ZNF282	7	black
ENSG00000133619	KRBA1	7	black
ENSG00000106479	ZNF862	7	black
ENSG00000204934	ATP6V0E2-AS1	7	black
ENSG00000106526	ACTR3C	7	black
ENSG00000284691	NA	7	black
ENSG00000164867	NOS3	7	black
ENSG00000126870	DYNC2I1	7	black
ENSG00000167393	PPP2R3B	7	black
ENSG00000197976	AKAP17A	7	black
ENSG00000015285	WAS	7	black
ENSG00000147144	CCDC120	7	black
ENSG00000102001	CACNA1F	7	black
ENSG00000270012	NA	7	black
ENSG00000184634	MED12	7	black
ENSG00000147130	ZMYM3	7	black
ENSG00000225470	JPX	7	black
ENSG00000156504	FAM122B	7	black
ENSG00000182195	LDOC1	7	black
ENSG00000183479	TREX2	7	black
ENSG00000158856	DMTN	7	black
ENSG00000120896	SORBS3	7	black
ENSG00000253200	NA	7	black
ENSG00000157110	RBPMS	7	black
ENSG00000254275	NA	7	black
ENSG00000282164	PEG13	7	black
ENSG00000171045	TSNARE1	7	black
ENSG00000130193	THEM6	7	black
ENSG00000250571	GLI4	7	black
ENSG00000204839	MROH6	7	black
ENSG00000181135	ZNF707	7	black
ENSG00000180900	SCRIB	7	black
ENSG00000185189	NRBP2	7	black
ENSG00000261150	EPPK1	7	black
ENSG00000178209	PLEC	7	black
ENSG00000178685	PARP10	7	black
ENSG00000185122	HSF1	7	black
ENSG00000187954	CYHR1	7	black
ENSG00000167702	KIFC2	7	black
ENSG00000160972	PPP1R16A	7	black
ENSG00000167700	MFSD3	7	black
ENSG00000160959	LRRC14	7	black
ENSG00000254017	IGHEP2	7	black
ENSG00000230581	ACTG1P14	7	black
ENSG00000165272	AQP3	7	black
ENSG00000164970	FAM219A	7	black
ENSG00000213930	GALT	7	black
ENSG00000137070	IL11RA	7	black
ENSG00000221829	FANCG	7	black
ENSG00000137103	TMEM8B	7	black
ENSG00000237846	NA	7	black
ENSG00000231799	NA	7	black
ENSG00000127084	FGD3	7	black
ENSG00000106948	AKNA	7	black
ENSG00000196152	ZNF79	7	black
ENSG00000136877	FPGS	7	black
ENSG00000106992	AK1	7	black
ENSG00000257524	ST6GALNAC6	7	black
ENSG00000148339	SLC25A25	7	black
ENSG00000234771	NA	7	black
ENSG00000160447	PKN3	7	black
ENSG00000160445	ZER1	7	black
ENSG00000148341	SH3GLB2	7	black
ENSG00000095321	CRAT	7	black
ENSG00000119383	PTPA	7	black
ENSG00000160271	RALGDS	7	black
ENSG00000175164	ABO	7	black
ENSG00000165684	SNAPC4	7	black
ENSG00000148384	INPP5E	7	black
ENSG00000148400	NOTCH1	7	black
ENSG00000237886	NA	7	black
ENSG00000165716	DIPK1B	7	black
ENSG00000196642	RABL6	7	black
ENSG00000177943	MAMDC4	7	black
ENSG00000127191	TRAF2	7	black
ENSG00000107331	ABCA2	7	black
ENSG00000176248	ANAPC2	7	black
ENSG00000188986	NELFB	7	black
ENSG00000187609	EXD3	7	black
ENSG00000174885	NLRP6	7	black
ENSG00000254910	NA	7	black
ENSG00000185101	ANO9	7	black
ENSG00000174775	HRAS	7	black
ENSG00000185522	LMNTD2	7	black
ENSG00000130595	TNNT3	7	black
ENSG00000166311	SMPD1	7	black
ENSG00000110171	TRIM3	7	black
ENSG00000109881	CCDC34	7	black
ENSG00000019485	PRDM11	7	black
ENSG00000149091	DGKZ	7	black
ENSG00000149136	SSRP1	7	black
ENSG00000149480	MTA2	7	black
ENSG00000149499	EML3	7	black
ENSG00000173511	VEGFB	7	black
ENSG00000168071	CCDC88B	7	black
ENSG00000068831	RASGRP2	7	black
ENSG00000068976	PYGM	7	black
ENSG00000171219	CDC42BPG	7	black
ENSG00000110046	ATG2A	7	black
ENSG00000162298	SYVN1	7	black
ENSG00000197136	PCNX3	7	black
ENSG00000172638	EFEMP2	7	black
ENSG00000175115	PACS1	7	black
ENSG00000174996	KLC2	7	black
ENSG00000174903	RAB1B	7	black
ENSG00000245156	NA	7	black
ENSG00000174851	YIF1A	7	black
ENSG00000174669	SLC29A2	7	black
ENSG00000173020	GRK2	7	black
ENSG00000175463	TBC1D10C	7	black
ENSG00000172663	TMEM134	7	black
ENSG00000254469	LOC100133315	7	black
ENSG00000085741	WNT11	7	black
ENSG00000118369	USP35	7	black
ENSG00000170145	SIK2	7	black
ENSG00000150764	DIXDC1	7	black
ENSG00000160613	PCSK7	7	black
ENSG00000107485	GATA3	7	black
ENSG00000228302	NA	7	black
ENSG00000165406	MARCHF8	7	black
ENSG00000250959	GLUD1P3	7	black
ENSG00000235316	NA	7	black
ENSG00000279689	NA	7	black
ENSG00000214655	ZSWIM8	7	black
ENSG00000148660	CAMK2G	7	black
ENSG00000075826	SEC31B	7	black
ENSG00000107829	FBXW4	7	black
ENSG00000269609	RPARP-AS1	7	black
ENSG00000273599	NA	7	black
ENSG00000002016	RAD52	7	black
ENSG00000171823	FBXL14	7	black
ENSG00000110799	VWF	7	black
ENSG00000139193	CD27	7	black
ENSG00000139197	PEX5	7	black
ENSG00000245105	A2M-AS1	7	black
ENSG00000175899	A2M	7	black
ENSG00000126838	PZP	7	black
ENSG00000256069	A2MP1	7	black
ENSG00000214826	NA	7	black
ENSG00000182993	C12orf60	7	black
ENSG00000013573	DDX11	7	black
ENSG00000139160	ETFBKMT	7	black
ENSG00000061273	HDAC7	7	black
ENSG00000139636	LMBR1L	7	black
ENSG00000110844	PRPF40B	7	black
ENSG00000066117	SMARCD1	7	black
ENSG00000272368	NA	7	black
ENSG00000184271	POU6F1	7	black
ENSG00000139631	CSAD	7	black
ENSG00000182796	TMEM198B	7	black
ENSG00000139641	ESYT1	7	black
ENSG00000166987	MBD6	7	black
ENSG00000178498	DTX3	7	black
ENSG00000135439	AGAP2	7	black
ENSG00000139266	MARCHF9	7	black
ENSG00000135407	AVIL	7	black
ENSG00000286067	NA	7	black
ENSG00000089094	KDM2B	7	black
ENSG00000188735	TMEM120B	7	black
ENSG00000196498	NCOR2	7	black
ENSG00000177169	ULK1	7	black
ENSG00000183495	EP400	7	black
ENSG00000279700	NA	7	black
ENSG00000177084	POLE	7	black
ENSG00000278949	NA	7	black
ENSG00000232587	EEF1A1P3	7	black
ENSG00000211777	TRAV3	7	black
ENSG00000211792	TRAV14DV4	7	black
ENSG00000139880	CDH24	7	black
ENSG00000119725	ZNF410	7	black
ENSG00000119689	DLST	7	black
ENSG00000165409	TSHR	7	black
ENSG00000258752	NA	7	black
ENSG00000088808	PPP1R13B	7	black
ENSG00000182979	MTA1	7	black
ENSG00000184986	TMEM121	7	black
ENSG00000211933	IGHV6-1	7	black
ENSG00000176454	LPCAT4	7	black
ENSG00000215252	GOLGA8B	7	black
ENSG00000188549	CCDC9B	7	black
ENSG00000140320	BAHD1	7	black
ENSG00000168970	JMJD7-PLA2G4B	7	black
ENSG00000140326	CDAN1	7	black
ENSG00000137822	TUBGCP4	7	black
ENSG00000179523	EIF3J-DT	7	black
ENSG00000246922	UBAP1L	7	black
ENSG00000090470	PDCD7	7	black
ENSG00000166949	SMAD3	7	black
ENSG00000129038	LOXL1	7	black
ENSG00000169375	SIN3A	7	black
ENSG00000140406	TLNRD1	7	black
ENSG00000176371	ZSCAN2	7	black
ENSG00000140521	POLG	7	black
ENSG00000103148	NPRL3	7	black
ENSG00000103126	AXIN1	7	black
ENSG00000129925	PGAP6	7	black
ENSG00000090565	RAB11FIP3	7	black
ENSG00000007541	PIGQ	7	black
ENSG00000161996	WDR90	7	black
ENSG00000127585	FBXL16	7	black
ENSG00000162004	CCDC78	7	black
ENSG00000103253	HAGHL	7	black
ENSG00000103227	LMF1	7	black
ENSG00000260051	NA	7	black
ENSG00000138834	MAPK8IP3	7	black
ENSG00000197774	EME2	7	black
ENSG00000167962	ZNF598	7	black
ENSG00000103197	TSC2	7	black
ENSG00000008710	PKD1	7	black
ENSG00000182685	BRICD5	7	black
ENSG00000167967	E4F1	7	black
ENSG00000162065	TBC1D24	7	black
ENSG00000162066	AMDHD2	7	black
ENSG00000059122	FLYWCH1	7	black
ENSG00000103145	HCFC1R1	7	black
ENSG00000261971	NA	7	black
ENSG00000008516	MMP25	7	black
ENSG00000006194	ZNF263	7	black
ENSG00000103351	CLUAP1	7	black
ENSG00000188827	SLX4	7	black
ENSG00000217930	PAM16	7	black
ENSG00000153443	UBALD1	7	black
ENSG00000153048	CARHSP1	7	black
ENSG00000188897	LOC400499	7	black
ENSG00000183458	PKD1P3	7	black
ENSG00000250251	PKD1P6	7	black
ENSG00000133392	MYH11	7	black
ENSG00000103222	ABCC1	7	black
ENSG00000103550	KNOP1	7	black
ENSG00000169246	NPIPB3	7	black
ENSG00000077238	IL4R	7	black
ENSG00000168488	ATXN2L	7	black
ENSG00000178188	SH2B1	7	black
ENSG00000177548	RABEP2	7	black
ENSG00000260367	NA	7	black
ENSG00000103495	MAZ	7	black
ENSG00000169592	INO80E	7	black
ENSG00000102882	MAPK3	7	black
ENSG00000169221	TBC1D10B	7	black
ENSG00000180096	SEPTIN1	7	black
ENSG00000156860	FBRS	7	black
ENSG00000140691	ARMC5	7	black
ENSG00000125170	DOK4	7	black
ENSG00000102890	ELMO3	7	black
ENSG00000135723	FHOD1	7	black
ENSG00000102977	ACD	7	black
ENSG00000124074	ENKD1	7	black
ENSG00000038358	EDC4	7	black
ENSG00000213398	LCAT	7	black
ENSG00000103168	TAF1C	7	black
ENSG00000131149	GSE1	7	black
ENSG00000185324	CDK10	7	black
ENSG00000158805	ZNF276	7	black
ENSG00000258839	MC1R	7	black
ENSG00000108963	DPH1	7	black
ENSG00000141258	SGSM2	7	black
ENSG00000070444	MNT	7	black
ENSG00000074370	ATP2A3	7	black
ENSG00000262823	NA	7	black
ENSG00000132382	MYBBP1A	7	black
ENSG00000141456	PELP1	7	black
ENSG00000141503	MINK1	7	black
ENSG00000108509	CAMTA2	7	black
ENSG00000286190	LOC728392	7	black
ENSG00000132535	DLG4	7	black
ENSG00000175826	CTDNEP1	7	black
ENSG00000215041	NEURL4	7	black
ENSG00000239697	TNFSF12	7	black
ENSG00000161956	SENP3	7	black
ENSG00000252835	SCARNA21	7	black
ENSG00000178971	CTC1	7	black
ENSG00000108557	RAI1	7	black
ENSG00000175662	TOM1L2	7	black
ENSG00000091536	MYO15A	7	black
ENSG00000232859	LYRM9	7	black
ENSG00000004139	SARM1	7	black
ENSG00000167536	DHRS13	7	black
ENSG00000109118	PHF12	7	black
ENSG00000221995	TIAF1	7	black
ENSG00000266777	NA	7	black
ENSG00000073536	NLE1	7	black
ENSG00000278535	DHRS11	7	black
ENSG00000275023	MLLT6	7	black
ENSG00000161381	PLXDC1	7	black
ENSG00000067191	CACNB1	7	black
ENSG00000161395	PGAP3	7	black
ENSG00000108352	RAPGEFL1	7	black
ENSG00000108773	KAT2A	7	black
ENSG00000108797	CNTNAP1	7	black
ENSG00000108840	HDAC5	7	black
ENSG00000013306	SLC25A39	7	black
ENSG00000181513	ACBD4	7	black
ENSG00000184922	FMNL1	7	black
ENSG00000006062	MAP3K14	7	black
ENSG00000264070	NA	7	black
ENSG00000228696	ARL17A	7	black
ENSG00000108819	PPP1R9B	7	black
ENSG00000265148	TSPOAP1-AS1	7	black
ENSG00000265206	NA	7	black
ENSG00000159640	ACE	7	black
ENSG00000136490	LIMD2	7	black
ENSG00000279369	NA	7	black
ENSG00000108622	ICAM2	7	black
ENSG00000227036	LINC00511	7	black
ENSG00000132481	TRIM47	7	black
ENSG00000175931	UBE2O	7	black
ENSG00000184640	SEPTIN9	7	black
ENSG00000141524	TMC6	7	black
ENSG00000279570	NA	7	black
ENSG00000171302	CANT1	7	black
ENSG00000181045	SLC26A11	7	black
ENSG00000263069	RNF213-AS1	7	black
ENSG00000141564	RPTOR	7	black
ENSG00000167302	TEPSIN	7	black
ENSG00000185813	PCYT2	7	black
ENSG00000169710	FASN	7	black
ENSG00000169660	HEXD	7	black
ENSG00000279981	NA	7	black
ENSG00000125846	ZNF133	7	black
ENSG00000131067	GGT7	7	black
ENSG00000078814	MYH7B	7	black
ENSG00000279253	NA	7	black
ENSG00000101082	SLA2	7	black
ENSG00000101104	PABPC1L	7	black
ENSG00000198026	ZNF335	7	black
ENSG00000042062	RIPOR3	7	black
ENSG00000149657	LSM14B	7	black
ENSG00000125534	PPDPF	7	black
ENSG00000130589	HELZ2	7	black
ENSG00000197457	STMN3	7	black
ENSG00000026036	RTEL1-TNFRSF6B	7	black
ENSG00000203896	LIME1	7	black
ENSG00000125520	SLC2A4RG	7	black
ENSG00000130584	ZBTB46	7	black
ENSG00000130590	SAMD10	7	black
ENSG00000141933	TPGS1	7	black
ENSG00000099821	POLRMT	7	black
ENSG00000070423	RNF126	7	black
ENSG00000198858	R3HDM4	7	black
ENSG00000180448	ARHGAP45	7	black
ENSG00000267493	CIRBP-AS1	7	black
ENSG00000079313	REXO1	7	black
ENSG00000099875	MKNK2	7	black
ENSG00000099840	IZUMO4	7	black
ENSG00000104885	DOT1L	7	black
ENSG00000104897	SF3A2	7	black
ENSG00000005206	SPPL2B	7	black
ENSG00000104964	TLE5	7	black
ENSG00000105325	FZR1	7	black
ENSG00000183397	C19orf71	7	black
ENSG00000105289	TJP3	7	black
ENSG00000141985	SH3GL1	7	black
ENSG00000167671	UBXN6	7	black
ENSG00000185361	TNFAIP8L1	7	black
ENSG00000105519	CAPS	7	black
ENSG00000130382	MLLT1	7	black
ENSG00000125648	SLC25A23	7	black
ENSG00000104833	TUBB4A	7	black
ENSG00000032444	PNPLA6	7	black
ENSG00000076984	MAP2K7	7	black
ENSG00000090661	CERS4	7	black
ENSG00000133250	ZNF414	7	black
ENSG00000142303	ADAMTS10	7	black
ENSG00000161847	RAVER1	7	black
ENSG00000130175	PRKCSH	7	black
ENSG00000095059	DHPS	7	black
ENSG00000095066	HOOK2	7	black
ENSG00000160877	NACC1	7	black
ENSG00000132003	ZSWIM4	7	black
ENSG00000132017	DCAF15	7	black
ENSG00000132005	RFX1	7	black
ENSG00000072062	PRKACA	7	black
ENSG00000267169	LOC100507373	7	black
ENSG00000072071	ADGRL1	7	black
ENSG00000123143	PKN1	7	black
ENSG00000141867	BRD4	7	black
ENSG00000011451	WIZ	7	black
ENSG00000085872	CHERP	7	black
ENSG00000099331	MYO9B	7	black
ENSG00000160113	NR2F6	7	black
ENSG00000074855	ANO8	7	black
ENSG00000130475	FCHO1	7	black
ENSG00000099308	MAST3	7	black
ENSG00000130518	IQCN	7	black
ENSG00000105701	FKBP8	7	black
ENSG00000064547	LPAR2	7	black
ENSG00000105726	ATP13A1	7	black
ENSG00000089351	GRAMD1A	7	black
ENSG00000105698	USF2	7	black
ENSG00000167595	PROSER3	7	black
ENSG00000004777	ARHGAP33	7	black
ENSG00000181392	SYNE4	7	black
ENSG00000105738	SIPA1L3	7	black
ENSG00000130669	PAK4	7	black
ENSG00000090924	PLEKHG2	7	black
ENSG00000130758	MAP3K10	7	black
ENSG00000086544	ITPKC	7	black
ENSG00000286177	LOC105372401	7	black
ENSG00000105723	GSK3A	7	black
ENSG00000079432	CIC	7	black
ENSG00000079435	LIPE	7	black
ENSG00000131116	ZNF428	7	black
ENSG00000104859	CLASRP	7	black
ENSG00000104866	PPP1R37	7	black
ENSG00000010310	GIPR	7	black
ENSG00000177051	FBXO46	7	black
ENSG00000104936	DMPK	7	black
ENSG00000170604	IRF2BP1	7	black
ENSG00000160014	CALM3	7	black
ENSG00000104894	CD37	7	black
ENSG00000126464	PRR12	7	black
ENSG00000126461	SCAF1	7	black
ENSG00000104973	MED25	7	black
ENSG00000104960	PTOV1	7	black
ENSG00000104946	TBC1D17	7	black
ENSG00000287608	NA	7	black
ENSG00000088038	CNOT3	7	black
ENSG00000105609	LILRB5	7	black
ENSG00000167615	LENG8	7	black
ENSG00000160439	RDH13	7	black
ENSG00000125503	PPP1R12C	7	black
ENSG00000133265	HSPBP1	7	black
ENSG00000218891	ZNF579	7	black
ENSG00000179943	FIZ1	7	black
ENSG00000213015	ZNF580	7	black
ENSG00000167685	ZNF444	7	black
ENSG00000171606	ZNF274	7	black
ENSG00000083838	ZNF446	7	black
ENSG00000185065	NA	7	black
ENSG00000099904	ZDHHC8	7	black
ENSG00000099910	KLHL22	7	black
ENSG00000184436	THAP7	7	black
ENSG00000224086	NA	7	black
ENSG00000234630	NA	7	black
ENSG00000253234	NA	7	black
ENSG00000230701	FBXW4P1	7	black
ENSG00000272578	NA	7	black
ENSG00000099956	SMARCB1	7	black
ENSG00000099991	CABIN1	7	black
ENSG00000100068	LRP5L	7	black
ENSG00000261188	NA	7	black
ENSG00000099992	TBC1D10A	7	black
ENSG00000133466	C1QTNF6	7	black
ENSG00000100092	SH3BP1	7	black
ENSG00000241360	PDXP	7	black
ENSG00000100151	PICK1	7	black
ENSG00000184381	PLA2G6	7	black
ENSG00000213923	CSNK1E	7	black
ENSG00000183741	CBX6	7	black
ENSG00000100307	CBX7	7	black
ENSG00000100324	TAB1	7	black
ENSG00000100359	SGSM3	7	black
ENSG00000237037	NDUFA6-DT	7	black
ENSG00000205702	CYP2D7	7	black
ENSG00000100207	TCF20	7	black
ENSG00000182841	RRP7BP	7	black
ENSG00000273188	NA	7	black
ENSG00000073169	SELENOO	7	black
ENSG00000128159	TUBGCP6	7	black
ENSG00000100241	SBF1	7	black
ENSG00000100299	ARSA	7	black
ENSG00000160190	SLC37A1	7	black
ENSG00000160226	CFAP410	7	black
ENSG00000160233	LRRC3	7	black
ENSG00000160256	FAM207A	7	black
ENSG00000160298	C21orf58	7	black
ENSG00000228794	LINC01128	2	blue
ENSG00000225880	LINC00115	2	blue
ENSG00000188290	HES4	2	blue
ENSG00000272106	NA	2	blue
ENSG00000272449	NA	2	blue
ENSG00000116251	RPL22	2	blue
ENSG00000162413	KLHL21	2	blue
ENSG00000116285	ERRFI1	2	blue
ENSG00000180758	GPR157	2	blue
ENSG00000171612	SLC25A33	2	blue
ENSG00000054523	KIF1B	2	blue
ENSG00000130940	CASZ1	2	blue
ENSG00000011021	CLCN6	2	blue
ENSG00000116731	PRDM2	2	blue
ENSG00000132906	CASP9	2	blue
ENSG00000037637	FBXO42	2	blue
ENSG00000055070	SZRD1	2	blue
ENSG00000169991	IFFO2	2	blue
ENSG00000158747	NBL1	2	blue
ENSG00000158748	HTR6	2	blue
ENSG00000169914	OTUD3	2	blue
ENSG00000231105	ECE1-AS1	2	blue
ENSG00000117318	ID3	2	blue
ENSG00000057757	PITHD1	2	blue
ENSG00000189266	PNRC2	2	blue
ENSG00000117616	RSRP1	2	blue
ENSG00000117632	STMN1	2	blue
ENSG00000204160	ZDHHC18	2	blue
ENSG00000130766	SESN2	2	blue
ENSG00000197989	SNHG12	2	blue
ENSG00000186056	MATN1-AS1	2	blue
ENSG00000175130	MARCKSL1	2	blue
ENSG00000279179	NA	2	blue
ENSG00000225313	NA	2	blue
ENSG00000116560	SFPQ	2	blue
ENSG00000092853	CLSPN	2	blue
ENSG00000163874	ZC3H12A	2	blue
ENSG00000163877	SNIP1	2	blue
ENSG00000185668	POU3F1	2	blue
ENSG00000183682	BMP8A	2	blue
ENSG00000116983	HPCAL4	2	blue
ENSG00000117000	RLF	2	blue
ENSG00000171793	CTPS1	2	blue
ENSG00000010803	SCMH1	2	blue
ENSG00000198815	FOXJ3	2	blue
ENSG00000186409	CCDC30	2	blue
ENSG00000117394	SLC2A1	2	blue
ENSG00000117399	CDC20	2	blue
ENSG00000173846	PLK3	2	blue
ENSG00000222009	BTBD19	2	blue
ENSG00000070759	TESK2	2	blue
ENSG00000132780	NASP	2	blue
ENSG00000117481	NSUN4	2	blue
ENSG00000123473	STIL	2	blue
ENSG00000123091	RNF11	2	blue
ENSG00000157193	LRP8	2	blue
ENSG00000116675	DNAJC6	2	blue
ENSG00000184588	PDE4B	2	blue
ENSG00000116704	SLC35D1	2	blue
ENSG00000116717	GADD45A	2	blue
ENSG00000116754	SRSF11	2	blue
ENSG00000116761	CTH	2	blue
ENSG00000036549	ZZZ3	2	blue
ENSG00000162642	C1orf52	2	blue
ENSG00000223653	NA	2	blue
ENSG00000065243	PKN2	2	blue
ENSG00000213516	RBMXL1	2	blue
ENSG00000286548	NA	2	blue
ENSG00000197147	LRRC8B	2	blue
ENSG00000231999	LRRC8C-DT	2	blue
ENSG00000162664	ZNF326	2	blue
ENSG00000122482	ZNF644	2	blue
ENSG00000117525	F3	2	blue
ENSG00000117569	PTBP2	2	blue
ENSG00000156875	MFSD14A	2	blue
ENSG00000240038	AMY2B	2	blue
ENSG00000162636	FAM102B	2	blue
ENSG00000228076	NA	2	blue
ENSG00000085433	WDR47	2	blue
ENSG00000197780	TAF13	2	blue
ENSG00000273382	NA	2	blue
ENSG00000143126	CELSR2	2	blue
ENSG00000116337	AMPD2	2	blue
ENSG00000213366	GSTM2	2	blue
ENSG00000184371	CSF1	2	blue
ENSG00000116396	KCNC4	2	blue
ENSG00000162775	RBM15	2	blue
ENSG00000177272	KCNA3	2	blue
ENSG00000085465	OVGP1	2	blue
ENSG00000064703	DDX20	2	blue
ENSG00000235299	MRPL53P1	2	blue
ENSG00000198799	LRIG2	2	blue
ENSG00000226167	AP4B1-AS1	2	blue
ENSG00000134262	AP4B1	2	blue
ENSG00000163349	HIPK1	2	blue
ENSG00000116752	BCAS2	2	blue
ENSG00000163399	ATP1A1	2	blue
ENSG00000203865	ATP1A1-AS1	2	blue
ENSG00000177173	NA	2	blue
ENSG00000183508	TENT5C	2	blue
ENSG00000281571	NA	2	blue
ENSG00000117262	GPR89A	2	blue
ENSG00000268043	NBPF12	2	blue
ENSG00000220323	H2BC19P	2	blue
ENSG00000277452	RN7SL473P	2	blue
ENSG00000274963	RN7SL600P	2	blue
ENSG00000143384	MCL1	2	blue
ENSG00000143367	TUFT1	2	blue
ENSG00000169242	EFNA1	2	blue
ENSG00000169231	THBS3	2	blue
ENSG00000235919	ASH1L-AS1	2	blue
ENSG00000160789	LMNA	2	blue
ENSG00000116604	MEF2D	2	blue
ENSG00000117036	ETV3	2	blue
ENSG00000158710	TAGLN2	2	blue
ENSG00000288093	NA	2	blue
ENSG00000117143	UAP1	2	blue
ENSG00000152382	TADA1	2	blue
ENSG00000143184	XCL1	2	blue
ENSG00000143153	ATP1B1	2	blue
ENSG00000143156	NME7	2	blue
ENSG00000117479	SLC19A2	2	blue
ENSG00000075945	KIFAP3	2	blue
ENSG00000094975	SUCO	2	blue
ENSG00000076321	KLHL20	2	blue
ENSG00000234741	GAS5	2	blue
ENSG00000185278	ZBTB37	2	blue
ENSG00000135870	RC3H1	2	blue
ENSG00000143322	ABL2	2	blue
ENSG00000162783	IER5	2	blue
ENSG00000143333	RGS16	2	blue
ENSG00000135862	LAMC1	2	blue
ENSG00000279838	NA	2	blue
ENSG00000116679	IVNS1ABP	2	blue
ENSG00000073756	PTGS2	2	blue
ENSG00000090104	RGS1	2	blue
ENSG00000213047	DENND1B	2	blue
ENSG00000261573	NA	2	blue
ENSG00000229989	NA	2	blue
ENSG00000159388	BTG2	2	blue
ENSG00000158615	PPP1R15B	2	blue
ENSG00000133059	DSTYK	2	blue
ENSG00000158711	ELK4	2	blue
ENSG00000133065	SLC41A1	2	blue
ENSG00000266094	RASSF5	2	blue
ENSG00000143479	DYRK3	2	blue
ENSG00000162889	MAPKAPK2	2	blue
ENSG00000224114	RPS14P1	2	blue
ENSG00000136634	IL10	2	blue
ENSG00000180667	YOD1	2	blue
ENSG00000196352	CD55	2	blue
ENSG00000203709	NA	2	blue
ENSG00000174059	CD34	2	blue
ENSG00000196878	LAMB3	2	blue
ENSG00000123689	G0S2	2	blue
ENSG00000143476	DTL	2	blue
ENSG00000162772	ATF3	2	blue
ENSG00000117724	CENPF	2	blue
ENSG00000092978	GPATCH2	2	blue
ENSG00000067533	RRP15	2	blue
ENSG00000218283	NA	2	blue
ENSG00000143507	DUSP10	2	blue
ENSG00000228106	NA	2	blue
ENSG00000143514	TP53BP2	2	blue
ENSG00000185495	NA	2	blue
ENSG00000242861	NA	2	blue
ENSG00000143751	SDE2	2	blue
ENSG00000143774	GUK1	2	blue
ENSG00000181873	IBA57	2	blue
ENSG00000234975	FTH1P2	2	blue
ENSG00000135801	TAF5L	2	blue
ENSG00000116903	EXOC8	2	blue
ENSG00000143674	MAP3K21	2	blue
ENSG00000168264	IRF2BP2	2	blue
ENSG00000238005	LOC101927851	2	blue
ENSG00000086619	ERO1B	2	blue
ENSG00000203668	CHML	2	blue
ENSG00000143702	CEP170	2	blue
ENSG00000117020	AKT3	2	blue
ENSG00000203667	COX20	2	blue
ENSG00000162852	CNST	2	blue
ENSG00000153207	AHCTF1	2	blue
ENSG00000196418	ZNF124	2	blue
ENSG00000162711	NLRP3	2	blue
ENSG00000177535	OR2B11	2	blue
ENSG00000115758	ODC1	2	blue
ENSG00000119771	KLHL29	2	blue
ENSG00000119778	ATAD2B	2	blue
ENSG00000115137	DNAJC27	2	blue
ENSG00000084731	KIF3C	2	blue
ENSG00000138018	SELENOI	2	blue
ENSG00000138074	SLC5A6	2	blue
ENSG00000171174	RBKS	2	blue
ENSG00000158019	BABAM2	2	blue
ENSG00000075426	FOSL2	2	blue
ENSG00000270640	NA	2	blue
ENSG00000163806	SPDYA	2	blue
ENSG00000163811	WDR43	2	blue
ENSG00000119801	YPEL5	2	blue
ENSG00000152689	RASGRP3	2	blue
ENSG00000008869	HEATR5B	2	blue
ENSG00000213553	RPLP0P6	2	blue
ENSG00000011566	MAP4K3	2	blue
ENSG00000143924	EML4	2	blue
ENSG00000287387	NA	2	blue
ENSG00000152518	ZFP36L2	2	blue
ENSG00000115970	THADA	2	blue
ENSG00000115239	ASB3	2	blue
ENSG00000068878	PSME4	2	blue
ENSG00000214595	EML6	2	blue
ENSG00000162994	CLHC1	2	blue
ENSG00000163001	CFAP36	2	blue
ENSG00000162924	REL	2	blue
ENSG00000237522	NA	2	blue
ENSG00000232713	NA	2	blue
ENSG00000115504	EHBP1	2	blue
ENSG00000143951	WDPCP	2	blue
ENSG00000197329	PELI1	2	blue
ENSG00000179833	SERTAD2	2	blue
ENSG00000115946	PNO1	2	blue
ENSG00000059728	MXD1	2	blue
ENSG00000244617	ASPRV1	2	blue
ENSG00000144036	EXOC6B	2	blue
ENSG00000163013	FBXO41	2	blue
ENSG00000135625	EGR4	2	blue
ENSG00000187605	TET3	2	blue
ENSG00000168906	MAT2A	2	blue
ENSG00000115548	KDM3A	2	blue
ENSG00000239305	RNF103	2	blue
ENSG00000285793	ANAPC1P2	2	blue
ENSG00000172071	EIF2AK3	2	blue
ENSG00000225523	IGKV6D-21	2	blue
ENSG00000174501	ANKRD36C	2	blue
ENSG00000158050	DUSP2	2	blue
ENSG00000196843	ARID5A	2	blue
ENSG00000158158	CNNM4	2	blue
ENSG00000135976	ANKRD36	2	blue
ENSG00000071073	MGAT4A	2	blue
ENSG00000115590	IL1R2	2	blue
ENSG00000254126	CD8B2	2	blue
ENSG00000153201	RANBP2	2	blue
ENSG00000153094	BCL2L11	2	blue
ENSG00000153107	ANAPC1	2	blue
ENSG00000144136	SLC20A1	2	blue
ENSG00000115008	IL1A	2	blue
ENSG00000125538	IL1B	2	blue
ENSG00000280228	NA	2	blue
ENSG00000136689	IL1RN	2	blue
ENSG00000236255	NA	2	blue
ENSG00000125633	CCDC93	2	blue
ENSG00000235066	NA	2	blue
ENSG00000279227	NA	2	blue
ENSG00000115109	EPB41L5	2	blue
ENSG00000115112	TFCP2L1	2	blue
ENSG00000074054	CLASP1	2	blue
ENSG00000136732	GYPC	2	blue
ENSG00000169967	MAP3K2	2	blue
ENSG00000236682	MAP3K2-DT	2	blue
ENSG00000136709	WDR33	2	blue
ENSG00000144233	AMMECR1L	2	blue
ENSG00000136715	SAP130	2	blue
ENSG00000076003	MCM6	2	blue
ENSG00000121966	CXCR4	2	blue
ENSG00000231758	NA	2	blue
ENSG00000169554	ZEB2	2	blue
ENSG00000283118	NA	2	blue
ENSG00000279166	NA	2	blue
ENSG00000204406	MBD5	2	blue
ENSG00000135999	EPC2	2	blue
ENSG00000123610	TNFAIP6	2	blue
ENSG00000153234	NR4A2	2	blue
ENSG00000136541	ERMN	2	blue
ENSG00000115165	CYTIP	2	blue
ENSG00000123612	ACVR1C	2	blue
ENSG00000198648	STK39	2	blue
ENSG00000154479	CCDC173	2	blue
ENSG00000144362	PHOSPHO2	2	blue
ENSG00000233762	RPS15P4	2	blue
ENSG00000172845	SP3	2	blue
ENSG00000116044	NFE2L2	2	blue
ENSG00000155657	TTN	2	blue
ENSG00000163492	CCDC141	2	blue
ENSG00000226564	NA	2	blue
ENSG00000061676	NCKAP1	2	blue
ENSG00000003436	TFPI	2	blue
ENSG00000115368	WDR75	2	blue
ENSG00000151690	MFSD6	2	blue
ENSG00000138386	NAB1	2	blue
ENSG00000173559	NABP1	2	blue
ENSG00000196950	SLC39A10	2	blue
ENSG00000081320	STK17B	2	blue
ENSG00000065413	ANKRD44	2	blue
ENSG00000115520	COQ10B	2	blue
ENSG00000115896	PLCL1	2	blue
ENSG00000013441	CLK1	2	blue
ENSG00000155749	FLACC1	2	blue
ENSG00000213090	SCYL2P1	2	blue
ENSG00000003393	ALS2	2	blue
ENSG00000286223	NA	2	blue
ENSG00000163599	CTLA4	2	blue
ENSG00000163600	ICOS	2	blue
ENSG00000114933	INO80D	2	blue
ENSG00000204186	ZDBF2	2	blue
ENSG00000118263	KLF7	2	blue
ENSG00000163251	FZD5	2	blue
ENSG00000138376	BARD1	2	blue
ENSG00000135913	USP37	2	blue
ENSG00000127824	TUBA4A	2	blue
ENSG00000135924	DNAJB2	2	blue
ENSG00000124006	OBSL1	2	blue
ENSG00000116106	EPHA4	2	blue
ENSG00000135919	SERPINE2	2	blue
ENSG00000115009	CCL20	2	blue
ENSG00000153832	FBXO36	2	blue
ENSG00000079263	SP140	2	blue
ENSG00000224376	NA	2	blue
ENSG00000156966	B3GNT7	2	blue
ENSG00000085978	ATG16L1	2	blue
ENSG00000077044	DGKD	2	blue
ENSG00000123485	HJURP	2	blue
ENSG00000231682	LINC01891	2	blue
ENSG00000188042	ARL4C	2	blue
ENSG00000286864	NA	2	blue
ENSG00000132326	PER2	2	blue
ENSG00000068024	HDAC4	2	blue
ENSG00000260942	CAPN10-DT	2	blue
ENSG00000178623	GPR35	2	blue
ENSG00000006607	FARP2	2	blue
ENSG00000204099	NEU4	2	blue
ENSG00000235831	BHLHE40-AS1	2	blue
ENSG00000134107	BHLHE40	2	blue
ENSG00000134109	EDEM1	2	blue
ENSG00000206573	THUMPD3-AS1	2	blue
ENSG00000269982	NA	2	blue
ENSG00000180385	NA	2	blue
ENSG00000186162	CIDECP1	2	blue
ENSG00000157014	TATDN2	2	blue
ENSG00000154781	CCDC174	2	blue
ENSG00000144597	EAF1	2	blue
ENSG00000206560	ANKRD28	2	blue
ENSG00000174738	NR1D2	2	blue
ENSG00000033867	SLC4A7	2	blue
ENSG00000178567	EPM2AIP1	2	blue
ENSG00000144674	GOLGA4	2	blue
ENSG00000114739	ACVR2B	2	blue
ENSG00000144655	CSRNP1	2	blue
ENSG00000144659	SLC25A38	2	blue
ENSG00000168036	CTNNB1	2	blue
ENSG00000144647	POMGNT2	2	blue
ENSG00000011198	ABHD5	2	blue
ENSG00000163820	FYCO1	2	blue
ENSG00000121797	CCRL2	2	blue
ENSG00000114648	KLHL18	2	blue
ENSG00000068745	IP6K2	2	blue
ENSG00000114302	PRKAR2A	2	blue
ENSG00000163938	GNL3	2	blue
ENSG00000213533	STIMATE	2	blue
ENSG00000272886	DCP1A	2	blue
ENSG00000113811	SELENOK	2	blue
ENSG00000174840	PDE12	2	blue
ENSG00000163684	RPP14	2	blue
ENSG00000163635	ATXN7	2	blue
ENSG00000144741	SLC25A26	2	blue
ENSG00000163376	KBTBD8	2	blue
ENSG00000114541	FRMD4B	2	blue
ENSG00000163421	PROK2	2	blue
ENSG00000163602	RYBP	2	blue
ENSG00000169379	ARL13B	2	blue
ENSG00000080822	CLDND1	2	blue
ENSG00000057019	DCBLD2	2	blue
ENSG00000168386	FILIP1L	2	blue
ENSG00000182504	CEP97	2	blue
ENSG00000144802	NFKBIZ	2	blue
ENSG00000114423	CBLB	2	blue
ENSG00000114439	BBX	2	blue
ENSG00000114446	IFT57	2	blue
ENSG00000198919	DZIP3	2	blue
ENSG00000121570	DPPA4	2	blue
ENSG00000240891	PLCXD2	2	blue
ENSG00000114529	C3orf52	2	blue
ENSG00000163611	SPICE1	2	blue
ENSG00000072858	SIDT1	2	blue
ENSG00000184307	ZDHHC23	2	blue
ENSG00000163617	CCDC191	2	blue
ENSG00000151576	QTRT2	2	blue
ENSG00000241490	LOC107986115	2	blue
ENSG00000181722	ZBTB20	2	blue
ENSG00000121578	B4GALT4	2	blue
ENSG00000176142	TMEM39A	2	blue
ENSG00000173230	GOLGB1	2	blue
ENSG00000138463	SLC49A4	2	blue
ENSG00000273033	LINC02035	2	blue
ENSG00000114544	SLC41A3	2	blue
ENSG00000163870	TPRA1	2	blue
ENSG00000034533	ASTE1	2	blue
ENSG00000163785	RYK	2	blue
ENSG00000114120	SLC25A36	2	blue
ENSG00000155903	RASA2	2	blue
ENSG00000114126	TFDP2	2	blue
ENSG00000175054	ATR	2	blue
ENSG00000120756	PLS1	2	blue
ENSG00000196428	TSC22D2	2	blue
ENSG00000181788	SIAH2	2	blue
ENSG00000144893	MED12L	2	blue
ENSG00000174944	P2RY14	2	blue
ENSG00000163659	TIPARP	2	blue
ENSG00000163660	CCNL1	2	blue
ENSG00000163661	PTX3	2	blue
ENSG00000178053	MLF1	2	blue
ENSG00000168811	IL12A	2	blue
ENSG00000163590	PPM1L	2	blue
ENSG00000269984	NA	2	blue
ENSG00000173889	PHC3	2	blue
ENSG00000136603	SKIL	2	blue
ENSG00000121879	PIK3CA	2	blue
ENSG00000058056	USP13	2	blue
ENSG00000114796	KLHL24	2	blue
ENSG00000163904	SENP2	2	blue
ENSG00000113916	BCL6	2	blue
ENSG00000114315	HES1	2	blue
ENSG00000133657	ATP13A3	2	blue
ENSG00000233058	NA	2	blue
ENSG00000072274	TFRC	2	blue
ENSG00000163960	UBXN7	2	blue
ENSG00000163975	MELTF	2	blue
ENSG00000185621	LMLN	2	blue
ENSG00000127418	FGFRL1	2	blue
ENSG00000109685	NSD2	2	blue
ENSG00000159788	RGS12	2	blue
ENSG00000173040	EVC2	2	blue
ENSG00000109519	GRPEL1	2	blue
ENSG00000137449	CPEB2	2	blue
ENSG00000007062	PROM1	2	blue
ENSG00000169762	TAPT1	2	blue
ENSG00000109805	NCAPG	2	blue
ENSG00000163138	PACRGL	2	blue
ENSG00000152990	ADGRA3	2	blue
ENSG00000168228	ZCCHC4	2	blue
ENSG00000091490	SEL1L3	2	blue
ENSG00000181826	RELL1	2	blue
ENSG00000109787	KLF3	2	blue
ENSG00000157796	WDR19	2	blue
ENSG00000124406	ATP8A1	2	blue
ENSG00000109189	USP46	2	blue
ENSG00000226950	DANCR	2	blue
ENSG00000134852	CLOCK	2	blue
ENSG00000128050	PAICS	2	blue
ENSG00000128040	SPINK2	2	blue
ENSG00000145241	CENPC	2	blue
ENSG00000083896	YTHDC1	2	blue
ENSG00000163734	CXCL3	2	blue
ENSG00000081041	CXCL2	2	blue
ENSG00000124882	EREG	2	blue
ENSG00000109321	AREG	2	blue
ENSG00000138757	G3BP2	2	blue
ENSG00000138767	CNOT6L	2	blue
ENSG00000163291	PAQR3	2	blue
ENSG00000138670	RASGEF1B	2	blue
ENSG00000251022	THAP9-AS1	2	blue
ENSG00000168152	THAP9	2	blue
ENSG00000138639	ARHGAP24	2	blue
ENSG00000177432	NAP1L5	2	blue
ENSG00000138640	FAM13A	2	blue
ENSG00000185477	GPRIN3	2	blue
ENSG00000184305	CCSER1	2	blue
ENSG00000138821	SLC39A8	2	blue
ENSG00000109320	NFKB1	2	blue
ENSG00000248971	KRT8P46	2	blue
ENSG00000251288	NA	2	blue
ENSG00000164038	SLC9B2	2	blue
ENSG00000247950	SEC24B-AS1	2	blue
ENSG00000138802	SEC24B	2	blue
ENSG00000174607	UGT8	2	blue
ENSG00000269893	SNHG8	2	blue
ENSG00000145375	SPATA5	2	blue
ENSG00000164056	SPRY1	2	blue
ENSG00000151014	NOCT	2	blue
ENSG00000109381	ELF2	2	blue
ENSG00000273247	NA	2	blue
ENSG00000109436	TBC1D9	2	blue
ENSG00000109458	GAB1	2	blue
ENSG00000164169	PRMT9	2	blue
ENSG00000198589	LRBA	2	blue
ENSG00000121210	TMEM131L	2	blue
ENSG00000287216	NA	2	blue
ENSG00000145428	RNF175	2	blue
ENSG00000164114	MAP9	2	blue
ENSG00000145414	NAF1	2	blue
ENSG00000109466	KLHL2	2	blue
ENSG00000154447	SH3RF1	2	blue
ENSG00000151718	WWC2	2	blue
ENSG00000168564	CDKN2AIP	2	blue
ENSG00000251230	NA	2	blue
ENSG00000151729	SLC25A4	2	blue
ENSG00000186352	ANKRD37	2	blue
ENSG00000171368	TPPP	2	blue
ENSG00000071539	TRIP13	2	blue
ENSG00000112941	TENT4A	2	blue
ENSG00000145495	MARCHF6	2	blue
ENSG00000164236	ANKRD33B	2	blue
ENSG00000173545	ZNF622	2	blue
ENSG00000176788	BASP1	2	blue
ENSG00000133401	PDZD2	2	blue
ENSG00000113389	NPR3	2	blue
ENSG00000113456	RAD1	2	blue
ENSG00000285967	NIPBL-DT	2	blue
ENSG00000164327	RICTOR	2	blue
ENSG00000171522	PTGER4	2	blue
ENSG00000172262	ZNF131	2	blue
ENSG00000112972	HMGCS1	2	blue
ENSG00000172244	C5orf34	2	blue
ENSG00000151883	PARP8	2	blue
ENSG00000213949	ITGA1	2	blue
ENSG00000152684	PELO	2	blue
ENSG00000145632	PLK2	2	blue
ENSG00000113448	PDE4D	2	blue
ENSG00000113595	TRIM23	2	blue
ENSG00000197860	SGTB	2	blue
ENSG00000145675	PIK3R1	2	blue
ENSG00000172062	SMN1	2	blue
ENSG00000171617	ENC1	2	blue
ENSG00000198780	FAM169A	2	blue
ENSG00000152409	JMY	2	blue
ENSG00000152413	HOMER1	2	blue
ENSG00000177034	MTX3	2	blue
ENSG00000145715	RASA1	2	blue
ENSG00000134480	CCNH	2	blue
ENSG00000164199	ADGRV1	2	blue
ENSG00000248323	LUCAT1	2	blue
ENSG00000113369	ARRDC3	2	blue
ENSG00000118985	ELL2	2	blue
ENSG00000153922	CHD1	2	blue
ENSG00000151422	FER	2	blue
ENSG00000164211	STARD4	2	blue
ENSG00000171444	MCC	2	blue
ENSG00000047188	YTHDC2	2	blue
ENSG00000152503	TRIM36	2	blue
ENSG00000145780	FEM1C	2	blue
ENSG00000064651	SLC12A2	2	blue
ENSG00000217128	FNIP1	2	blue
ENSG00000125347	IRF1	2	blue
ENSG00000131437	KIF3A	2	blue
ENSG00000119048	UBE2B	2	blue
ENSG00000181904	C5orf24	2	blue
ENSG00000177733	HNRNPA0	2	blue
ENSG00000158402	CDC25C	2	blue
ENSG00000120709	FAM53C	2	blue
ENSG00000120705	ETF1	2	blue
ENSG00000113013	HSPA9	2	blue
ENSG00000015479	MATR3	2	blue
ENSG00000170464	DNAJC18	2	blue
ENSG00000250069	NA	2	blue
ENSG00000113070	HBEGF	2	blue
ENSG00000213523	SRA1	2	blue
ENSG00000145882	PCYOX1L	2	blue
ENSG00000230551	NA	2	blue
ENSG00000132912	DCTN4	2	blue
ENSG00000211445	GPX3	2	blue
ENSG00000055163	CYFIP2	2	blue
ENSG00000172548	NIPAL4	2	blue
ENSG00000253522	MIR3142HG	2	blue
ENSG00000250274	LOC100128059	2	blue
ENSG00000113734	BNIP1	2	blue
ENSG00000131188	PRR7	2	blue
ENSG00000197451	HNRNPAB	2	blue
ENSG00000161021	MAML1	2	blue
ENSG00000137265	IRF4	2	blue
ENSG00000170542	SERPINB9	2	blue
ENSG00000137267	TUBB2A	2	blue
ENSG00000111837	MAK	2	blue
ENSG00000224531	SMIM13	2	blue
ENSG00000111859	NEDD9	2	blue
ENSG00000095951	HIVEP1	2	blue
ENSG00000215022	LOC100130357	2	blue
ENSG00000112149	CD83	2	blue
ENSG00000008083	JARID2	2	blue
ENSG00000007944	MYLIP	2	blue
ENSG00000229931	NA	2	blue
ENSG00000272341	NA	2	blue
ENSG00000124789	NUP153	2	blue
ENSG00000272168	NA	2	blue
ENSG00000112312	GMNN	2	blue
ENSG00000275713	H2BC9	2	blue
ENSG00000124508	BTN2A2	2	blue
ENSG00000197903	H2BC12	2	blue
ENSG00000096654	ZNF184	2	blue
ENSG00000233822	H2BC15	2	blue
ENSG00000197279	ZNF165	2	blue
ENSG00000196812	ZSCAN16	2	blue
ENSG00000198315	ZKSCAN8	2	blue
ENSG00000235109	ZSCAN31	2	blue
ENSG00000181126	HLA-V	2	blue
ENSG00000066379	POLR1H	2	blue
ENSG00000231074	HCG18	2	blue
ENSG00000204599	TRIM39	2	blue
ENSG00000241370	RPP21	2	blue
ENSG00000204590	GNL1	2	blue
ENSG00000137331	IER3	2	blue
ENSG00000232810	TNF	2	blue
ENSG00000204389	HSPA1A	2	blue
ENSG00000204388	HSPA1B	2	blue
ENSG00000204387	SNHG32	2	blue
ENSG00000204386	NEU1	2	blue
ENSG00000204348	DXO	2	blue
ENSG00000204344	STK19	2	blue
ENSG00000221988	PPT2	2	blue
ENSG00000196735	HLA-DQA1	2	blue
ENSG00000223534	HLA-DQB1-AS1	2	blue
ENSG00000224557	HLA-DPB2	2	blue
ENSG00000231500	RPS18	2	blue
ENSG00000196821	ILRUN	2	blue
ENSG00000065060	UHRF1BP1	2	blue
ENSG00000112081	SRSF3	2	blue
ENSG00000124762	CDKN1A	2	blue
ENSG00000183826	BTBD9	2	blue
ENSG00000164626	KCNK5	2	blue
ENSG00000001167	NFYA	2	blue
ENSG00000124731	TREM1	2	blue
ENSG00000124659	TBCC	2	blue
ENSG00000112624	BICRAL	2	blue
ENSG00000112658	SRF	2	blue
ENSG00000171453	POLR1C	2	blue
ENSG00000124688	MAD2L1BP	2	blue
ENSG00000112715	VEGFA	2	blue
ENSG00000231881	NA	2	blue
ENSG00000096384	HSP90AB1	2	blue
ENSG00000146232	NFKBIE	2	blue
ENSG00000196284	SUPT3H	2	blue
ENSG00000124813	RUNX2	2	blue
ENSG00000146072	TNFRSF21	2	blue
ENSG00000216775	LOC730101	2	blue
ENSG00000137269	LRRC1	2	blue
ENSG00000112200	ZNF451	2	blue
ENSG00000112208	BAG2	2	blue
ENSG00000285976	PTP4A1	2	blue
ENSG00000185760	KCNQ5	2	blue
ENSG00000013375	PGM3	2	blue
ENSG00000135334	AKIRIN2	2	blue
ENSG00000146278	PNRC1	2	blue
ENSG00000287789	NA	2	blue
ENSG00000085382	HACE1	2	blue
ENSG00000057657	PRDM1	2	blue
ENSG00000178409	BEND3	2	blue
ENSG00000280135	NA	2	blue
ENSG00000118689	FOXO3	2	blue
ENSG00000135587	SMPD2	2	blue
ENSG00000123505	AMD1	2	blue
ENSG00000231889	TRAF3IP2-AS1	2	blue
ENSG00000203778	FAM229B	2	blue
ENSG00000187189	TSPYL4	2	blue
ENSG00000196911	KPNA5	2	blue
ENSG00000111860	CEP85L	2	blue
ENSG00000066651	TRMT11	2	blue
ENSG00000112282	MED23	2	blue
ENSG00000112339	HBS1L	2	blue
ENSG00000135541	AHI1	2	blue
ENSG00000286313	NA	2	blue
ENSG00000029363	BCLAF1	2	blue
ENSG00000220412	NA	2	blue
ENSG00000237499	WAKMAR2	2	blue
ENSG00000118503	TNFAIP3	2	blue
ENSG00000112378	PERP	2	blue
ENSG00000218565	LOC100129844	2	blue
ENSG00000189007	ADAT2	2	blue
ENSG00000135604	STX11	2	blue
ENSG00000152818	UTRN	2	blue
ENSG00000164506	STXBP5	2	blue
ENSG00000111962	UST	2	blue
ENSG00000178199	ZC3H12D	2	blue
ENSG00000131013	PPIL4	2	blue
ENSG00000131015	ULBP2	2	blue
ENSG00000120278	PLEKHG1	2	blue
ENSG00000120254	MTHFD1L	2	blue
ENSG00000181472	ZBTB2	2	blue
ENSG00000146426	TIAM2	2	blue
ENSG00000029639	TFB1M	2	blue
ENSG00000229502	NA	2	blue
ENSG00000092820	EZR	2	blue
ENSG00000271913	LOC105378083	2	blue
ENSG00000164691	TAGAP	2	blue
ENSG00000224478	NA	2	blue
ENSG00000112096	SOD2	2	blue
ENSG00000146457	WTAP	2	blue
ENSG00000120437	ACAT2	2	blue
ENSG00000213073	CHP1P2	2	blue
ENSG00000085511	MAP3K4	2	blue
ENSG00000185345	PRKN	2	blue
ENSG00000071242	RPS6KA2	2	blue
ENSG00000213066	CEP43	2	blue
ENSG00000130396	AFDN	2	blue
ENSG00000130024	PHF10	2	blue
ENSG00000184786	DYNLT2	2	blue
ENSG00000198719	DLL1	2	blue
ENSG00000198517	MAFK	2	blue
ENSG00000196204	RNF216P1	2	blue
ENSG00000075618	FSCN1	2	blue
ENSG00000106346	USP42	2	blue
ENSG00000146530	VWDE	2	blue
ENSG00000214960	CRPPA	2	blue
ENSG00000071189	SNX13	2	blue
ENSG00000105849	POLR1F	2	blue
ENSG00000136244	IL6	2	blue
ENSG00000164548	TRA2A	2	blue
ENSG00000105928	GSDME	2	blue
ENSG00000172115	CYCS	2	blue
ENSG00000235859	NA	2	blue
ENSG00000106341	PPP1R17	2	blue
ENSG00000105778	AVL9	2	blue
ENSG00000237004	NA	2	blue
ENSG00000170852	KBTBD2	2	blue
ENSG00000232956	SNHG15	2	blue
ENSG00000214765	SEPTIN7P2	2	blue
ENSG00000234444	ZNF736	2	blue
ENSG00000169902	TPST1	2	blue
ENSG00000154710	RABGEF1	2	blue
ENSG00000126524	SBDS	2	blue
ENSG00000106610	STAG3L4	2	blue
ENSG00000158321	AUTS2	2	blue
ENSG00000106635	BCL7B	2	blue
ENSG00000071462	BUD23	2	blue
ENSG00000005486	RHBDD2	2	blue
ENSG00000170027	YWHAG	2	blue
ENSG00000146707	POMZP3	2	blue
ENSG00000135164	DMTF1	2	blue
ENSG00000135185	TMEM243	2	blue
ENSG00000127914	AKAP9	2	blue
ENSG00000001630	CYP51A1	2	blue
ENSG00000105810	CDK6	2	blue
ENSG00000242265	PEG10	2	blue
ENSG00000158528	PPP1R9A	2	blue
ENSG00000164715	LMTK2	2	blue
ENSG00000198742	SMURF1	2	blue
ENSG00000106246	PTCD1	2	blue
ENSG00000160908	ZNF394	2	blue
ENSG00000146834	MEPCE	2	blue
ENSG00000106366	SERPINE1	2	blue
ENSG00000237513	NA	2	blue
ENSG00000105835	NAMPT	2	blue
ENSG00000105856	HBP1	2	blue
ENSG00000135241	PNPLA8	2	blue
ENSG00000128590	DNAJB9	2	blue
ENSG00000006652	IFRD1	2	blue
ENSG00000181016	LSMEM1	2	blue
ENSG00000279086	NA	2	blue
ENSG00000105976	MET	2	blue
ENSG00000106299	WASL	2	blue
ENSG00000048405	ZNF800	2	blue
ENSG00000179562	GCC1	2	blue
ENSG00000279078	SND1-IT1	2	blue
ENSG00000128578	STRIP2	2	blue
ENSG00000186591	UBE2H	2	blue
ENSG00000233559	NA	2	blue
ENSG00000226380	NA	2	blue
ENSG00000271204	NA	2	blue
ENSG00000231721	LINC-PINT	2	blue
ENSG00000236753	MKLN1-AS	2	blue
ENSG00000122786	CALD1	2	blue
ENSG00000287733	NA	2	blue
ENSG00000232053	NA	2	blue
ENSG00000105939	ZC3HAV1	2	blue
ENSG00000157764	BRAF	2	blue
ENSG00000270157	NA	2	blue
ENSG00000211734	TRBV5-1	2	blue
ENSG00000229153	EPHA1-AS1	2	blue
ENSG00000242048	LOC644090	2	blue
ENSG00000239911	NA	2	blue
ENSG00000157212	PAXIP1	2	blue
ENSG00000273117	NA	2	blue
ENSG00000186480	INSIG1	2	blue
ENSG00000182378	PLCXD1	2	blue
ENSG00000223773	CD99P1	2	blue
ENSG00000165195	PIGA	2	blue
ENSG00000169895	SYAP1	2	blue
ENSG00000047634	SCML1	2	blue
ENSG00000008086	CDKL5	2	blue
ENSG00000130066	SAT1	2	blue
ENSG00000174010	KLHL15	2	blue
ENSG00000005889	ZFX	2	blue
ENSG00000101868	POLA1	2	blue
ENSG00000120280	TASL	2	blue
ENSG00000228232	NA	2	blue
ENSG00000180182	MED14	2	blue
ENSG00000215301	DDX3X	2	blue
ENSG00000147044	CASK	2	blue
ENSG00000147050	KDM6A	2	blue
ENSG00000230844	ZNF674-AS1	2	blue
ENSG00000102221	JADE3	2	blue
ENSG00000102265	TIMP1	2	blue
ENSG00000102096	PIM2	2	blue
ENSG00000184205	TSPYL2	2	blue
ENSG00000184083	FAM120C	2	blue
ENSG00000102349	KLF8	2	blue
ENSG00000198205	ZXDA	2	blue
ENSG00000131089	ARHGEF9	2	blue
ENSG00000102043	MTMR8	2	blue
ENSG00000090889	KIF4A	2	blue
ENSG00000184481	FOXO4	2	blue
ENSG00000147162	OGT	2	blue
ENSG00000131263	RLIM	2	blue
ENSG00000078589	P2RY10	2	blue
ENSG00000165288	BRWD3	2	blue
ENSG00000198157	HMGN5	2	blue
ENSG00000204086	RPA4	2	blue
ENSG00000241343	RPL36A	2	blue
ENSG00000102393	GLA	2	blue
ENSG00000126947	ARMCX1	2	blue
ENSG00000102401	ARMCX3	2	blue
ENSG00000184867	ARMCX2	2	blue
ENSG00000166432	ZMAT1	2	blue
ENSG00000147231	RADX	2	blue
ENSG00000147224	PRPS1	2	blue
ENSG00000157514	TSC22D3	2	blue
ENSG00000080561	MID2	2	blue
ENSG00000101935	AMMECR1	2	blue
ENSG00000101901	ALG13	2	blue
ENSG00000241743	NA	2	blue
ENSG00000131725	WDR44	2	blue
ENSG00000175556	LONRF3	2	blue
ENSG00000056277	ZNF280C	2	blue
ENSG00000156500	FAM122C	2	blue
ENSG00000147274	RBMX	2	blue
ENSG00000010404	IDS	2	blue
ENSG00000241489	NA	2	blue
ENSG00000197620	EOLA1	2	blue
ENSG00000197021	EOLA2	2	blue
ENSG00000130821	SLC6A8	2	blue
ENSG00000102119	EMD	2	blue
ENSG00000182372	CLN8	2	blue
ENSG00000173295	FAM86B3P	2	blue
ENSG00000173273	TNKS	2	blue
ENSG00000104643	MTMR9	2	blue
ENSG00000154359	LONRF1	2	blue
ENSG00000164741	DLC1	2	blue
ENSG00000155970	MICU3	2	blue
ENSG00000129422	MTUS1	2	blue
ENSG00000156011	PSD3	2	blue
ENSG00000179388	EGR3	2	blue
ENSG00000120889	TNFRSF10B	2	blue
ENSG00000104689	TNFRSF10A	2	blue
ENSG00000197217	ENTPD4	2	blue
ENSG00000167034	NKX3-1	2	blue
ENSG00000042980	ADAM28	2	blue
ENSG00000104756	KCTD9	2	blue
ENSG00000228451	SDAD1P1	2	blue
ENSG00000186918	ZNF395	2	blue
ENSG00000259366	NA	2	blue
ENSG00000120875	DUSP4	2	blue
ENSG00000133872	SARAF	2	blue
ENSG00000104671	DCTN6	2	blue
ENSG00000156675	RAB11FIP1	2	blue
ENSG00000165046	LETM2	2	blue
ENSG00000147536	GINS4	2	blue
ENSG00000287535	NA	2	blue
ENSG00000271938	NA	2	blue
ENSG00000261449	NA	2	blue
ENSG00000070718	AP3M2	2	blue
ENSG00000198846	TOX	2	blue
ENSG00000185728	YTHDF3	2	blue
ENSG00000140396	NCOA2	2	blue
ENSG00000205189	ZBTB10	2	blue
ENSG00000076641	PAG1	2	blue
ENSG00000133742	CA1	2	blue
ENSG00000104312	RIPK2	2	blue
ENSG00000253394	LINC00534	2	blue
ENSG00000164953	TMEM67	2	blue
ENSG00000164949	GEM	2	blue
ENSG00000164938	TP53INP1	2	blue
ENSG00000164920	OSR2	2	blue
ENSG00000034677	RNF19A	2	blue
ENSG00000155090	KLF10	2	blue
ENSG00000155096	AZIN1	2	blue
ENSG00000253320	NA	2	blue
ENSG00000164758	MED30	2	blue
ENSG00000136960	ENPP2	2	blue
ENSG00000155792	DEPTOR	2	blue
ENSG00000172167	MTBP	2	blue
ENSG00000253372	NA	2	blue
ENSG00000156804	FBXO32	2	blue
ENSG00000176853	FAM91A1	2	blue
ENSG00000183665	TRMT12	2	blue
ENSG00000245149	RNF139-AS1	2	blue
ENSG00000170881	RNF139	2	blue
ENSG00000170873	MTSS1	2	blue
ENSG00000104549	SQLE	2	blue
ENSG00000253438	PCAT1	2	blue
ENSG00000155926	SLA	2	blue
ENSG00000287736	PTCSC1	2	blue
ENSG00000008513	ST3GAL1	2	blue
ENSG00000259820	NA	2	blue
ENSG00000198576	ARC	2	blue
ENSG00000196150	ZNF250	2	blue
ENSG00000080608	PUM3	2	blue
ENSG00000120158	RCL1	2	blue
ENSG00000155158	TTC39B	2	blue
ENSG00000147874	HAUS6	2	blue
ENSG00000147872	PLIN2	2	blue
ENSG00000260912	NA	2	blue
ENSG00000096872	IFT74	2	blue
ENSG00000285103	NA	2	blue
ENSG00000197579	TOPORS	2	blue
ENSG00000086061	DNAJA1	2	blue
ENSG00000086062	B4GALT1	2	blue
ENSG00000137094	DNAJB5	2	blue
ENSG00000137135	ARHGEF39	2	blue
ENSG00000159921	GNE	2	blue
ENSG00000137075	RNF38	2	blue
ENSG00000165304	MELK	2	blue
ENSG00000168795	ZBTB5	2	blue
ENSG00000107242	PIP5K1B	2	blue
ENSG00000107282	APBA1	2	blue
ENSG00000119138	KLF9	2	blue
ENSG00000135048	CEMIP2	2	blue
ENSG00000107372	ZFAND5	2	blue
ENSG00000196781	TLE1	2	blue
ENSG00000135040	NAA35	2	blue
ENSG00000135070	ISCA1	2	blue
ENSG00000123975	CKS2	2	blue
ENSG00000187742	SECISBP2	2	blue
ENSG00000130222	GADD45G	2	blue
ENSG00000188312	CENPP	2	blue
ENSG00000127081	ZNF484	2	blue
ENSG00000131669	NINJ1	2	blue
ENSG00000158079	PTPDC1	2	blue
ENSG00000148120	AOPEP	2	blue
ENSG00000182150	ERCC6L2	2	blue
ENSG00000158122	PRXL2C	2	blue
ENSG00000136925	TSTD2	2	blue
ENSG00000136932	TRMO	2	blue
ENSG00000119508	NR4A3	2	blue
ENSG00000106692	FKTN	2	blue
ENSG00000119326	CTNNAL1	2	blue
ENSG00000157654	PALM2AKAP2	2	blue
ENSG00000059769	DNAJC25	2	blue
ENSG00000095397	WHRN	2	blue
ENSG00000056558	TRAF1	2	blue
ENSG00000056586	RC3H2	2	blue
ENSG00000136935	GOLGA1	2	blue
ENSG00000169155	ZBTB43	2	blue
ENSG00000136828	RALGPS1	2	blue
ENSG00000160408	ST6GALNAC6	2	blue
ENSG00000188483	IER5L	2	blue
ENSG00000148344	PTGES	2	blue
ENSG00000097007	ABL1	2	blue
ENSG00000165699	TSC1	2	blue
ENSG00000165661	QSOX2	2	blue
ENSG00000233016	SNHG7	2	blue
ENSG00000176058	TPRN	2	blue
ENSG00000188229	TUBB4B	2	blue
ENSG00000198435	NRARP	2	blue
ENSG00000251661	NA	2	blue
ENSG00000184545	DUSP8	2	blue
ENSG00000269821	KCNQ1OT1	2	blue
ENSG00000181649	PHLDA2	2	blue
ENSG00000223609	HBD	2	blue
ENSG00000175352	NRIP3	2	blue
ENSG00000166483	WEE1	2	blue
ENSG00000254554	NA	2	blue
ENSG00000148926	ADM	2	blue
ENSG00000133794	ARNTL	2	blue
ENSG00000133818	RRAS2	2	blue
ENSG00000188211	NCR3LG1	2	blue
ENSG00000179119	SPTY2D1	2	blue
ENSG00000185238	PRMT3	2	blue
ENSG00000121621	KIF18A	2	blue
ENSG00000166016	ABTB2	2	blue
ENSG00000026508	CD44	2	blue
ENSG00000213693	SEC14L1P1	2	blue
ENSG00000121671	CRY2	2	blue
ENSG00000172409	CLP1	2	blue
ENSG00000156603	MED19	2	blue
ENSG00000110048	OSBP	2	blue
ENSG00000166927	MS4A7	2	blue
ENSG00000166928	MS4A14	2	blue
ENSG00000167987	VPS37C	2	blue
ENSG00000168496	FEN1	2	blue
ENSG00000221968	FADS3	2	blue
ENSG00000167996	FTH1	2	blue
ENSG00000124942	AHNAK	2	blue
ENSG00000162194	LBHD1	2	blue
ENSG00000214756	CSKMT	2	blue
ENSG00000162231	NXF1	2	blue
ENSG00000133316	WDR74	2	blue
ENSG00000255717	SNHG1	2	blue
ENSG00000168003	SLC3A2	2	blue
ENSG00000168066	SF1	2	blue
ENSG00000146670	CDCA5	2	blue
ENSG00000149806	FAU	2	blue
ENSG00000173825	TIGD3	2	blue
ENSG00000173727	NA	2	blue
ENSG00000260233	NA	2	blue
ENSG00000172803	SNX32	2	blue
ENSG00000175592	FOSL1	2	blue
ENSG00000175376	EIF1AD	2	blue
ENSG00000248643	RBM14-RBM4	2	blue
ENSG00000173933	RBM4	2	blue
ENSG00000173120	KDM2A	2	blue
ENSG00000175505	CLCF1	2	blue
ENSG00000172927	MYEOV	2	blue
ENSG00000110092	CCND1	2	blue
ENSG00000172893	DHCR7	2	blue
ENSG00000285693	NA	2	blue
ENSG00000137478	FCHSD2	2	blue
ENSG00000054967	RELT	2	blue
ENSG00000054965	FAM168A	2	blue
ENSG00000168014	C2CD3	2	blue
ENSG00000165434	PGM2L1	2	blue
ENSG00000166439	RNF169	2	blue
ENSG00000198382	UVRAG	2	blue
ENSG00000137507	LRRC32	2	blue
ENSG00000048649	RSF1	2	blue
ENSG00000251323	LINC02728	2	blue
ENSG00000165494	PCF11	2	blue
ENSG00000247137	LOC100506282	2	blue
ENSG00000137494	ANKRD42	2	blue
ENSG00000110172	CHORDC1	2	blue
ENSG00000166012	TAF1D	2	blue
ENSG00000149212	SESN3	2	blue
ENSG00000087053	MTMR2	2	blue
ENSG00000165895	ARHGAP42	2	blue
ENSG00000023445	BIRC3	2	blue
ENSG00000149289	ZC3H12C	2	blue
ENSG00000086848	ALG9	2	blue
ENSG00000150787	PTS	2	blue
ENSG00000076053	RBM7	2	blue
ENSG00000109917	ZPR1	2	blue
ENSG00000137726	FXYD6	2	blue
ENSG00000160588	MPZL3	2	blue
ENSG00000118096	IFT46	2	blue
ENSG00000019144	PHLDB1	2	blue
ENSG00000110367	DDX6	2	blue
ENSG00000160683	CXCR5	2	blue
ENSG00000186166	CENATAC	2	blue
ENSG00000196655	TRAPPC4	2	blue
ENSG00000188486	H2AX	2	blue
ENSG00000109943	CRTAM	2	blue
ENSG00000109971	HSPA8	2	blue
ENSG00000023171	GRAMD1B	2	blue
ENSG00000196323	ZBTB44	2	blue
ENSG00000166086	JAM3	2	blue
ENSG00000232656	IDI2-AS1	2	blue
ENSG00000067064	IDI1	2	blue
ENSG00000067082	KLF6	2	blue
ENSG00000173848	NET1	2	blue
ENSG00000108021	TASOR2	2	blue
ENSG00000170525	PFKFB3	2	blue
ENSG00000065675	PRKCQ	2	blue
ENSG00000198879	SFMBT2	2	blue
ENSG00000148429	USP6NL	2	blue
ENSG00000065665	SEC61A2	2	blue
ENSG00000284024	HSPA14	2	blue
ENSG00000148481	MINDY3	2	blue
ENSG00000165997	ARL5B	2	blue
ENSG00000233968	LOC101928834	2	blue
ENSG00000078114	NEBL	2	blue
ENSG00000165312	OTUD1	2	blue
ENSG00000099256	PRTFDC1	2	blue
ENSG00000120539	MASTL	2	blue
ENSG00000095739	BAMBI	2	blue
ENSG00000107968	MAP3K8	2	blue
ENSG00000165322	ARHGAP12	2	blue
ENSG00000169826	CSGALNACT2	2	blue
ENSG00000198964	SGMS1	2	blue
ENSG00000151151	IPMK	2	blue
ENSG00000170312	CDK1	2	blue
ENSG00000150347	ARID5B	2	blue
ENSG00000122877	EGR2	2	blue
ENSG00000171988	JMJD1C	2	blue
ENSG00000096717	SIRT1	2	blue
ENSG00000204130	RUFY2	2	blue
ENSG00000165732	DDX21	2	blue
ENSG00000156502	SUPV3L1	2	blue
ENSG00000079332	SAR1A	2	blue
ENSG00000168209	DDIT4	2	blue
ENSG00000122882	ECD	2	blue
ENSG00000166348	USP54	2	blue
ENSG00000122861	PLAU	2	blue
ENSG00000156650	KAT6B	2	blue
ENSG00000156671	SAMD8	2	blue
ENSG00000108179	PPIF	2	blue
ENSG00000122378	PRXL2A	2	blue
ENSG00000107771	CCSER2	2	blue
ENSG00000198682	PAPSS2	2	blue
ENSG00000204020	LIPN	2	blue
ENSG00000165338	HECTD2	2	blue
ENSG00000107864	CPEB3	2	blue
ENSG00000095637	SORBS1	2	blue
ENSG00000107443	CCNJ	2	blue
ENSG00000235677	NA	2	blue
ENSG00000052749	RRP12	2	blue
ENSG00000155252	PI4K2A	2	blue
ENSG00000119986	AVPI1	2	blue
ENSG00000166024	R3HCC1L	2	blue
ENSG00000107554	DNMBP	2	blue
ENSG00000099194	SCD	2	blue
ENSG00000166197	NOLC1	2	blue
ENSG00000059915	PSD	2	blue
ENSG00000065621	GSTO2	2	blue
ENSG00000148841	ITPRIP	2	blue
ENSG00000228261	NA	2	blue
ENSG00000119950	MXI1	2	blue
ENSG00000138166	DUSP5	2	blue
ENSG00000214413	BBIP1	2	blue
ENSG00000148737	TCF7L2	2	blue
ENSG00000151553	FAM160B1	2	blue
ENSG00000165646	SLC18A2	2	blue
ENSG00000165650	PDZD8	2	blue
ENSG00000151929	BAG3	2	blue
ENSG00000095574	IKZF5	2	blue
ENSG00000203791	EEF1AKMT2	2	blue
ENSG00000019995	ZRANB1	2	blue
ENSG00000132334	PTPRE	2	blue
ENSG00000151640	DPYSL4	2	blue
ENSG00000068383	INPP5A	2	blue
ENSG00000235245	NA	2	blue
ENSG00000271500	NA	2	blue
ENSG00000139190	VAMP1	2	blue
ENSG00000111665	CDCA3	2	blue
ENSG00000173262	SLC2A14	2	blue
ENSG00000059804	SLC2A3	2	blue
ENSG00000089818	NECAP1	2	blue
ENSG00000284634	NA	2	blue
ENSG00000110848	CD69	2	blue
ENSG00000255882	NA	2	blue
ENSG00000173391	OLR1	2	blue
ENSG00000165685	TMEM52B	2	blue
ENSG00000139112	GABARAPL1	2	blue
ENSG00000213809	KLRK1	2	blue
ENSG00000060138	YBX3	2	blue
ENSG00000165714	BORCS5	2	blue
ENSG00000111266	DUSP16	2	blue
ENSG00000111276	CDKN1B	2	blue
ENSG00000213782	DDX47	2	blue
ENSG00000013588	GPRC5A	2	blue
ENSG00000084444	FAM234B	2	blue
ENSG00000134531	EMP1	2	blue
ENSG00000261324	NA	2	blue
ENSG00000197837	H4-16	2	blue
ENSG00000023734	STRAP	2	blue
ENSG00000152944	MED21	2	blue
ENSG00000170456	DENND5B	2	blue
ENSG00000276900	NA	2	blue
ENSG00000273015	NA	2	blue
ENSG00000134294	SLC38A2	2	blue
ENSG00000177875	CCDC184	2	blue
ENSG00000139620	KANSL2	2	blue
ENSG00000129315	CCNT1	2	blue
ENSG00000172602	RND1	2	blue
ENSG00000125084	WNT1	2	blue
ENSG00000167550	RHEBL1	2	blue
ENSG00000167552	TUBA1A	2	blue
ENSG00000161835	TAMALIN	2	blue
ENSG00000123358	NR4A1	2	blue
ENSG00000123395	ATG101	2	blue
ENSG00000170442	KRT86	2	blue
ENSG00000186049	KRT73	2	blue
ENSG00000111057	KRT18	2	blue
ENSG00000197111	PCBP2	2	blue
ENSG00000139572	GPR84	2	blue
ENSG00000123342	MMP19	2	blue
ENSG00000135469	COQ10A	2	blue
ENSG00000110944	IL23A	2	blue
ENSG00000166881	NEMP1	2	blue
ENSG00000166886	NAB2	2	blue
ENSG00000175197	DDIT3	2	blue
ENSG00000118596	SLC16A7	2	blue
ENSG00000196935	SRGAP1	2	blue
ENSG00000174206	C12orf66	2	blue
ENSG00000174099	MSRB3	2	blue
ENSG00000225422	NA	2	blue
ENSG00000155974	GRIP1	2	blue
ENSG00000111554	MDM1	2	blue
ENSG00000234040	RPL10P12	2	blue
ENSG00000135679	MDM2	2	blue
ENSG00000257815	PRANCR	2	blue
ENSG00000173451	THAP2	2	blue
ENSG00000257497	NA	2	blue
ENSG00000139289	PHLDA1	2	blue
ENSG00000270344	NA	2	blue
ENSG00000258302	NA	2	blue
ENSG00000070961	ATP2B1	2	blue
ENSG00000257242	LINC01619	2	blue
ENSG00000133639	BTG1	2	blue
ENSG00000245904	NA	2	blue
ENSG00000059758	CDK17	2	blue
ENSG00000238105	GOLGA2P5	2	blue
ENSG00000281344	NA	2	blue
ENSG00000213442	RPL18AP3	2	blue
ENSG00000136044	APPL2	2	blue
ENSG00000136026	CKAP4	2	blue
ENSG00000166046	TCP11L2	2	blue
ENSG00000120832	MTERF2	2	blue
ENSG00000008405	CRY1	2	blue
ENSG00000151136	BTBD11	2	blue
ENSG00000139438	FAM222A	2	blue
ENSG00000198270	TMEM116	2	blue
ENSG00000089169	RPH3A	2	blue
ENSG00000135116	HRK	2	blue
ENSG00000174989	FBXW8	2	blue
ENSG00000277283	NA	2	blue
ENSG00000089157	RPLP0	2	blue
ENSG00000184047	DIABLO	2	blue
ENSG00000111011	RSRC2	2	blue
ENSG00000182782	HCAR2	2	blue
ENSG00000255398	HCAR3	2	blue
ENSG00000139722	VPS37B	2	blue
ENSG00000280138	NA	2	blue
ENSG00000280120	NA	2	blue
ENSG00000150977	RILPL2	2	blue
ENSG00000168778	TCTN2	2	blue
ENSG00000270061	NA	2	blue
ENSG00000179195	ZNF664	2	blue
ENSG00000150991	UBC	2	blue
ENSG00000198393	ZNF26	2	blue
ENSG00000214029	ZNF891	2	blue
ENSG00000256223	ZNF10	2	blue
ENSG00000165474	GJB2	2	blue
ENSG00000102678	FGF9	2	blue
ENSG00000182957	SPATA13	2	blue
ENSG00000139517	LNX2	2	blue
ENSG00000102755	FLT1	2	blue
ENSG00000139514	SLC7A1	2	blue
ENSG00000132952	USPL1	2	blue
ENSG00000120694	HSPH1	2	blue
ENSG00000102743	SLC25A15	2	blue
ENSG00000120690	ELF1	2	blue
ENSG00000165572	KBTBD6	2	blue
ENSG00000102760	RGCC	2	blue
ENSG00000102763	VWA8	2	blue
ENSG00000102780	DGKH	2	blue
ENSG00000179630	LACC1	2	blue
ENSG00000083635	NUFIP1	2	blue
ENSG00000174032	SLC25A30	2	blue
ENSG00000102445	RUBCNL	2	blue
ENSG00000136141	LRCH1	2	blue
ENSG00000136159	NUDT15	2	blue
ENSG00000152207	CYSLTR2	2	blue
ENSG00000102786	INTS6	2	blue
ENSG00000278238	NA	2	blue
ENSG00000136108	CKAP2	2	blue
ENSG00000139734	DIAPH3	2	blue
ENSG00000083544	TDRD3	2	blue
ENSG00000102554	KLF5	2	blue
ENSG00000118922	KLF12	2	blue
ENSG00000102805	CLN5	2	blue
ENSG00000136158	SPRY2	2	blue
ENSG00000215417	MIR17HG	2	blue
ENSG00000247400	DNAJC3-DT	2	blue
ENSG00000139793	MBNL2	2	blue
ENSG00000152767	FARP1	2	blue
ENSG00000125245	GPR18	2	blue
ENSG00000169508	GPR183	2	blue
ENSG00000134899	ERCC5	2	blue
ENSG00000185950	IRS2	2	blue
ENSG00000150401	DCUN1D2	2	blue
ENSG00000198805	PNP	2	blue
ENSG00000165804	ZNF219	2	blue
ENSG00000258441	LINC00641	2	blue
ENSG00000139890	REM2	2	blue
ENSG00000196792	STRN3	2	blue
ENSG00000165410	CFL2	2	blue
ENSG00000151327	FAM177A1	2	blue
ENSG00000100906	NFKBIA	2	blue
ENSG00000174373	RALGAPA1	2	blue
ENSG00000257957	QRSL1P3	2	blue
ENSG00000100916	BRMS1L	2	blue
ENSG00000100941	PNN	2	blue
ENSG00000165355	FBXO33	2	blue
ENSG00000179454	KLHL28	2	blue
ENSG00000214900	LINC01588	2	blue
ENSG00000100483	VCPKMT	2	blue
ENSG00000100523	DDHD1	2	blue
ENSG00000180008	SOCS4	2	blue
ENSG00000178974	FBXO34	2	blue
ENSG00000258469	NA	2	blue
ENSG00000100614	PPM1A	2	blue
ENSG00000020426	MNAT1	2	blue
ENSG00000027075	PRKCH	2	blue
ENSG00000258926	NA	2	blue
ENSG00000100644	HIF1A	2	blue
ENSG00000023608	SNAPC1	2	blue
ENSG00000126804	ZBTB1	2	blue
ENSG00000259116	LOC102723809	2	blue
ENSG00000126803	HSPA2	2	blue
ENSG00000033170	FUT8	2	blue
ENSG00000072415	MPP5	2	blue
ENSG00000100564	PIGH	2	blue
ENSG00000081181	ARG2	2	blue
ENSG00000100731	PCNX1	2	blue
ENSG00000205683	DPF3	2	blue
ENSG00000119599	DCAF4	2	blue
ENSG00000184227	ACOT1	2	blue
ENSG00000176903	PNMA1	2	blue
ENSG00000156030	MIDEAS	2	blue
ENSG00000089916	GPATCH2L	2	blue
ENSG00000119669	IRF2BPL	2	blue
ENSG00000273729	NA	2	blue
ENSG00000100629	CEP128	2	blue
ENSG00000165521	EML5	2	blue
ENSG00000258424	NA	2	blue
ENSG00000100600	LGMN	2	blue
ENSG00000165943	MOAP1	2	blue
ENSG00000089737	DDX24	2	blue
ENSG00000227051	C14orf132	2	blue
ENSG00000127152	BCL11B	2	blue
ENSG00000090061	CCNK	2	blue
ENSG00000176473	WDR25	2	blue
ENSG00000258512	LINC00239	2	blue
ENSG00000259161	NA	2	blue
ENSG00000156381	ANKRD9	2	blue
ENSG00000131323	TRAF3	2	blue
ENSG00000100664	EIF5	2	blue
ENSG00000183484	GPR132	2	blue
ENSG00000213145	CRIP1	2	blue
ENSG00000211934	IGHV1-2	2	blue
ENSG00000211942	IGHV3-13	2	blue
ENSG00000223648	IGHV3-64	2	blue
ENSG00000275835	TUBGCP5	2	blue
ENSG00000185115	NSMCE3	2	blue
ENSG00000248905	FMN1	2	blue
ENSG00000140199	SLC12A6	2	blue
ENSG00000175265	GOLGA8A	2	blue
ENSG00000137801	THBS1	2	blue
ENSG00000128891	CCDC32	2	blue
ENSG00000137812	KNL1	2	blue
ENSG00000137877	SPTBN5	2	blue
ENSG00000137842	TMEM62	2	blue
ENSG00000166947	EPB42	2	blue
ENSG00000166963	MAP1A	2	blue
ENSG00000168781	PPIP5K1	2	blue
ENSG00000138606	SHF	2	blue
ENSG00000166920	C15orf48	2	blue
ENSG00000259354	NA	2	blue
ENSG00000140284	SLC27A2	2	blue
ENSG00000140287	HDC	2	blue
ENSG00000069956	MAPK6	2	blue
ENSG00000047346	FAM214A	2	blue
ENSG00000181827	RFX7	2	blue
ENSG00000128918	ALDH1A2	2	blue
ENSG00000259600	NA	2	blue
ENSG00000259379	MTND5P32	2	blue
ENSG00000166035	LIPC	2	blue
ENSG00000157450	RNF111	2	blue
ENSG00000157456	CCNB2	2	blue
ENSG00000069667	RORA	2	blue
ENSG00000140455	USP3	2	blue
ENSG00000169118	CSNK1G1	2	blue
ENSG00000166839	ANKDD1A	2	blue
ENSG00000174485	DENND4A	2	blue
ENSG00000259924	NA	2	blue
ENSG00000137818	RPLP1	2	blue
ENSG00000140332	TLE3	2	blue
ENSG00000166233	ARIH1	2	blue
ENSG00000067141	NEO1	2	blue
ENSG00000198794	SCAMP5	2	blue
ENSG00000138621	PPCDC	2	blue
[truncated: 9,657 more rows]
