# Supplementary material for: Differential Co-Expression Network Analysis Reveals Key Hub-High Traffic Genes as Potential Therapeutic Targets for COVID-19 Pandemic
Source: Front Immunol. 2021 Dec 15;12:789317. doi: 10.3389/fimmu.2021.789317 (PMC8714803; doi:10.3389/fimmu.2021.789317)
Supplement: Supplementary file 5 [file Table_4.xlsx]

## Sheet: Module_preservation
Supplementary Table 4: Complete details about the preservation status of all modules
Module	moduleSize	medianRank.pres	Zsummary.pres							Preservation_status
salmon	192	1	24							Preserved_modules
cyan	181	3	16							Non-preserved_modules
green	769	3	43
tan	198	5	15
lightcyan	161	6	13
magenta	542	6	25
greenyellow	290	10	13
grey60	140	10	9.4
pink	592	10	19
brown	991	11	28
lightyellow	120	11	7.9
lightgreen	137	12	8.3
darkred	93	14	6.7
yellow	889	14	19
midnightblue	170	15	7.5
red	743	15	17
purple	459	16	13
royalblue	104	16	6.4
black	643	17	14
blue	1776	20	12
turquoise	1818	22	7.4
