# Supplementary material for: Differential Co-Expression Network Analysis Reveals Key Hub-High Traffic Genes as Potential Therapeutic Targets for COVID-19 Pandemic
Source: Front Immunol. 2021 Dec 15;12:789317. doi: 10.3389/fimmu.2021.789317 (PMC8714803; doi:10.3389/fimmu.2021.789317)
Supplement: Supplementary file 6 [file Table_5.xlsx]

## Sheet: blue
Supplementary Table 5: Results of functional enrichment analysis per non-preserved module
BP	Term	Overlap	P-value	Adjusted P-value	Old P-value	Old Adjusted P-value	Odds Ratio	Combined Score	Genes	KEGG	Term	Overlap	P-value	Adjusted P-value	Old P-value	Old Adjusted P-value	Odds Ratio	Combined Score	Genes
	regulation of transcription by RNA polymerase II (GO:0006357)	278/2206	1.41331e-14	6.24116e-11	0	0	1.75494	55.9656	ZNF296;CCNK;CCNH;MAML1;SERPINE1;JMJD1C;IKZF5;ELK4;IL4I1;ZXDA;ZSCAN31;ZC3H12A;NAMPT;SAP130;BBX;DPF3;EPC2;KAT7;CCNL1;IER5;JUNB;RNF111;ZNF165;IFRD1;ZNF10;ZNF14;RUNX2;JMJD6;RFX7;DDIT3;EZR;CLOCK;ATF3;ATF4;ZNF395;CASZ1;ZNF394;SRCAP;SP140;ZBTB1;ZNF23;PIK3R1;ZBTB5;HIF1A;ZNF26;MED12L;ZBTB2;HIVEP1;ZNF700;ZSCAN16;ZNF267;ZBED4;HEXIM1;PLK3;CREBBP;EGR2;XBP1;JAG1;EGR3;JUND;EGR4;FZD5;BCL11B;GADD45A;SS18L1;NFATC3…	.	p53 signaling pathway	22/73	4.20982e-08	1.26295e-05	0	0	4.9177	83.5186	CDKN1A;GADD45B;GADD45A;SERPINE1;SIAH1;TNFRSF10B;TNFRSF10A;THBS1;GADD45G;CASP9;CCNB2;CDK6;CCND1;SESN3;CCNE1;PERP;SESN2;CDK1;MDM2;PMAIP1;CYCS;ATR
	regulation of transcription, DNA-templated (GO:0006355)	274/2244	9.91213e-13	2.1886e-09	0	0	1.68351	46.5319	ZNF296;CCNK;CCNH;JMJD1C;IKZF5;ELK4;ZXDA;ZSCAN31;BBX;DPF3;EPC2;KAT7;CCNL1;JUNB;RNF111;ZNF165;SFMBT2;IFRD1;ZNF10;ZNF14;RUNX2;EREG;JMJD6;RFX7;DDIT3;PRKCQ;CLOCK;ATF3;ATF4;ZNF395;CASZ1;ZNF394;SRCAP;SP140;ZBTB1;ZNF23;ZBTB5;HIF1A;ZNF26;MED12L;ZBTB2;HIVEP1;ZNF700;ZSCAN16;ZNF267;HEXIM1;CDK17;CREBBP;EGR2;EGR3;JUND;EGR4;BCL11B;SS18L1;NFATC3;IRF2BP2;NR1D2;CDC6;PHC3;FOSL2;FOSL1;POLA1;SNAI1;REL;ID3;HBP1;ZNF136…	.	Small cell lung cancer	24/92	2.18428e-07	2.26371e-05	0	0	4.02485	61.7283	CDKN1A;CDKN1B;GADD45B;LAMB3;GADD45A;LAMC1;TRAF1;PIK3R1;PTGS2;NFKB1;GADD45G;CASP9;NFKBIA;CDK6;CCND1;PIK3CA;TRAF4;CCNE1;TRAF3;AKT3;CKS2;E2F1;CYCS;BIRC3
	positive regulation of transcription by RNA polymerase II (GO:0045944)	134/908	7.02577e-12	1.03419e-08	0	0	2.0378	52.3336	ZNF451;ZNF296;CCNK;CCNT1;MAML1;SERPINE1;RORA;PRDM2;TNF;ELK4;IL4I1;ZC3H12A;NAMPT;EP300;DPF3;KAT7;IER5;JUNB;RNF111;OSR2;RUNX2;JMJD6;KAT6B;DDIT3;CLOCK;ATF3;ATF4;ZNF395;CASZ1;PAXIP1;TNKS;MEPCE;FOXO4;PIK3R1;FOXO3;HIF1A;RLF;MED30;UBB;UBC;HIVEP1;ABL1;NLRP3;ZBED4;AKIRIN2;CREBBP;EGR2;XBP1;JAG1;JUND;EGR4;AUTS2;PHF10;FZD5;BCL11B;SS18L1;ECD;NFATC3;NR1D2;NFKB1;FOSL2;SMAD7;FOSL1;NFKBIA;NR4A2;AHI1;NR4A1;IL6;RGC…	.	TNF signaling pathway	27/112	2.26371e-07	2.26371e-05	0	0	3.62578	55.4783	CSF1;TNFAIP3;PIK3R1;CXCL3;PTGS2;TNF;CXCL2;ICAM1;SOCS3;AKT3;MAP3K8;JUNB;MAP2K6;JAG1;CCL20;TRAF1;MMP9;NFKB1;NFKBIA;IL6;PIK3CA;TRAF3;IL1B;IRF1;BCL3;ATF4;BIRC3
	positive regulation of transcription, DNA-templated (GO:0045893)	161/1183	3.569e-11	3.94017e-08	0	0	1.86176	44.7867	ZNF451;ZNF296;CCNK;CCNT1;MAML1;SERPINE1;RORA;PRDM2;TNF;ETS2;ELK4;IL4I1;ZXDA;HMGN5;ZC3H12A;NAMPT;EP300;DPF3;KAT7;PIM2;IER5;JUNB;RNF111;OSR2;WDR75;POU3F1;RUNX2;JMJD6;LBHD1;KAT6B;DDIT3;CLOCK;ATF3;ATF4;ZNF395;CASZ1;TNKS;FOXO4;PIK3R1;FOXO3;HIF1A;RLF;MED30;UBB;UBC;HIVEP1;ABL1;NLRP3;WNT1;ZBED4;AKIRIN2;CREBBP;EGR2;XBP1;JAG1;JUND;EGR4;AUTS2;PHF10;FZD5;BCL11B;BICRAL;SS18L1;ECD;EIF2AK3;NFATC3;NR1D2;NFKB1;FO…	.	FoxO signaling pathway	29/131	5.69701e-07	3.32589e-05	0	0	3.24633	46.6762	CDKN1A;CDKN1B;IRS2;FOXO4;PIK3R1;FOXO3;CCNB2;BCL2L11;CCND1;AKT3;EP300;IL10;PLK3;GABARAPL1;CREBBP;GADD45B;HOMER1;GADD45A;PLK2;BRAF;FBXO32;SOD2;SIRT1;KLF2;GADD45G;IL6;BCL6;PIK3CA;MDM2
	negative regulation of transcription, DNA-templated (GO:0045892)	134/948	1.44162e-10	1.27324e-07	0	0	1.93326	43.8078	NDUFA13;NAB1;GMNN;NAB2;WWC2;ZBTB21;PRDM2;PRDM1;TNF;ETS2;IKZF5;ELK4;ZFP36;CCND1;BASP1;SCMH1;SAP130;EP300;DPF3;KAT7;OSR2;TLE1;KDM2A;SFMBT2;ARID5A;ZNF10;ARID5B;HIC1;RUNX2;EREG;HIC2;KAT6B;DDIT3;ERF;EZR;CLOCK;ATF3;ATF4;ZBTB1;FOXO3;ZBTB5;ZBTB2;UBB;UBC;HIVEP1;SKIL;HEXIM1;PLK3;HSPA8;CREBBP;PHF10;CBX4;SMURF2;GADD45A;IRF2BP2;NR1D2;PHC3;NFKB1;SMAD7;EFNA1;NR4A2;NR4A3;BCL6;SP3;BHLHE40;BCL3;MDM2;SNAI1;ID3;PAF1…	.	Lipid and atherosclerosis	40/215	6.47652e-07	3.32589e-05	0	0	2.61742	37.2981	HSP90AB1;CCL3L1;PIK3R1;CXCL3;TNF;CXCL2;ICAM1;CASP9;AKT3;CCL3;OLR1;NLRP3;IL12A;LDLR;MAP2K6;HSPA8;XBP1;EIF2AK3;NFATC3;TNFRSF10B;TNFRSF10A;HSPA2;TICAM1;SOD2;MMP9;NFKB1;MIB1;ERN1;NFKBIA;IL6;PIK3CA;TRAF3;DDIT3;IL1B;CYCS;HSPA1B;ABCG1;ATF4;HSPA1A;NFE2L2
	regulation of apoptotic process (GO:0042981)	110/742	4.50617e-10	3.31654e-07	0	0	2.03258	43.7419	TFRC;TNF;HMGN5;RPS6KA2;PROK2;PIM3;PIM2;PHLDA1;TIAM2;MELK;PPIF;ATF4;DIABLO;DCUN1D3;PIK3R1;FOXO3;BCL2L11;UBB;BAG3;UBC;ABL1;TP53BP2;PMAIP1;WNT1;IP6K2;MCL1;BARD1;HSPA9;PLK3;MOAP1;CREBBP;XBP1;STIL;EGR3;GADD45B;CBX4;GADD45A;PLK2;SIAH2;SIAH1;TNFRSF10B;BRAF;TNFRSF10A;NFKB1;GADD45G;KLHL20;NET1;NFKBIA;AHI1;IL6;BCL6;BCL3;JMY;CDK1;TNFSF9;HRK;USP36;PRR7;DDX3X;SRA1;SH3RF1;CASP9;BABAM2;DSTYK;CTLA4;IFT57;IL10;TN…	.	C-type lectin receptor signaling pathway	25/104	6.65179e-07	3.32589e-05	0	0	3.60886	51.3295	CBLB;PIK3R1;PTGS2;TNF;RELB;AKT3;NLRP3;IL12A;IL10;PLK3;EGR2;EGR3;NFATC3;RRAS2;NFKB1;NFKBIA;CYLD;IL6;PIK3CA;IL23A;IL1B;IRF1;MAPKAPK2;BCL3;MDM2
	negative regulation of transcription by RNA polymerase II (GO:0000122)	102/684	1.43341e-09	9.04275e-07	0	0	2.04169	41.5754	ZNF451;WWC2;ZBTB21;PRDM2;PRDM1;TNF;ETS2;IKZF5;ELK4;ZFP36;CCND1;SAP130;EP300;OSR2;ARID5A;ZNF10;ARID5B;HIC1;DDIT3;ERF;EZR;ATF3;ATF4;ZBTB1;FOXO3;ZBTB5;ZBTB2;UBB;BAG3;UBC;HIVEP1;SKIL;HEXIM1;PLK3;CREBBP;CBX4;SMURF2;GADD45A;NFATC3;IRF2BP2;NR1D2;NFKB1;SMAD7;EFNA1;NR4A2;NR4A3;BCL6;BHLHE40;SNAI1;MDM2;ID3;PAF1;MAFK;CPEB3;MXD1;ZNF136;ZNF891;IRF2BPL;ZNF529;ZNF124;ZNF587B;KLF10;TGIF1;KLF12;SIRT1;PPM1A;ZEB2;SF…	.	Cellular senescence	32/156	9.27945e-07	3.97691e-05	0	0	2.94859	40.9568	CDKN1A;SERPINE1;PIK3R1;FOXO3;ZFP36L2;CCNB2;CCND1;RASSF5;AKT3;E2F1;MYBL2;MAP2K6;GADD45B;GADD45A;NFATC3;RRAS2;TSC1;HIPK1;SIRT1;NFKB1;GADD45G;IL1A;IL6;CDK6;PIK3CA;CCNE1;MAPKAPK2;CDK1;MDM2;RAD1;SLC25A4;ATR
	response to unfolded protein (GO:0006986)	19/49	3.20135e-09	1.76714e-06	0	0	7.21489	141.121	PRKN;HSPA9;HSPA8;PTPN1;HSP90AB1;HSPA2;HSPA14;HSPA13;HERPUD1;ERN1;DNAJB2;DNAJA1;DNAJB1;HSPH1;BAG3;DNAJB5;DDIT3;HSPA1B;HSPA1A	.	Legionellosis	17/57	1.68533e-06	6.31999e-05	0	0	4.83292	64.2467	HBS1L;HSPA8;SAR1A;HSPA2;CXCL3;CXCL2;TNF;NFKB1;CASP9;CLK1;NFKBIA;IL6;IL1B;CYCS;IL12A;HSPA1B;HSPA1A
	positive regulation of apoptotic process (GO:0043065)	55/310	3.07455e-08	1.50858e-05	0	0	2.48245	42.9402	HRK;PRR7;BTG1;DDX3X;TNF;CASP9;RPS6KA2;ZC3H12A;CTLA4;PHLDA1;NKX3-1;TNFRSF12A;SIRT1;TIAM2;ARHGEF9;MELK;DDIT3;SIK1;ATF4;DIABLO;DCUN1D3;DDX20;FOXO3;GNA13;BCLAF1;BCL2L11;ACVR1C;PNMA1;UBB;UBC;TP53BP2;ABL1;CCL3;E2F1;PMAIP1;ZNF622;IP6K2;BARD1;MOAP1;GADD45B;GADD45A;SIAH1;TNFRSF10B;TNFRSF10A;GADD45G;NET1;DNAJA1;IL6;RYBP;BCL6;TRIM39;DLC1;STK17B;JMY;CTNNB1	.	Prostate cancer	23/97	2.37032e-06	7.90107e-05	0	0	3.54104	45.8652	TCF7L2;CREBBP;CDKN1A;CDKN1B;HSP90AB1;IL1R2;BRAF;PIK3R1;MMP9;NFKB1;NFKBIA;CASP9;CCND1;PIK3CA;PLAU;CCNE1;AKT3;MDM2;E2F1;EP300;CTNNB1;ATF4;NKX3-1
	regulation of cell cycle (GO:0051726)	52/296	1.00946e-07	4.45779e-05	0	0	2.44967	39.461	CDKN1A;CDKN1B;HSP90AB1;GMNN;SRA1;ADARB1;CCND1;RPS6KA2;EP300;IL12A;PIM3;MYBL2;PIM2;JUNB;NKX3-1;TSPYL2;TSC1;MASTL;SIRT1;MLF1;ERN1;IRF1;CKS2;SIK1;DTL;BIRC3;PPP1R15A;DCUN1D3;FOXO4;THBS1;ARNTL;CCNB2;TP53INP1;TP53BP2;ABL1;MAP2K6;BARD1;TCF7L2;JUND;GADD45B;GADD45A;GADD45G;PER2;CYLD;NR4A1;CENPF;CDK6;RGCC;JMY;MDM2;HBP1;NOP53	.	MAPK signaling pathway	48/294	2.71394e-06	8.14183e-05	0	0	2.23693	28.671	FLT1;CSF1;SRF;AREG;TNF;DUSP16;RELB;RASGRP3;ELK4;DUSP10;FGF9;RPS6KA2;AKT3;STMN1;MAP3K8;MAP4K3;MAP3K4;MAP2K6;DUSP4;MAP3K2;DUSP5;HSPA8;DUSP2;JUND;GADD45B;GADD45A;NFATC3;RRAS2;BRAF;HSPA2;DUSP8;NFKB1;EREG;GADD45G;VEGFA;EFNA1;IL1A;NR4A1;PPM1A;DDIT3;IL1B;RASA1;MAPKAPK2;RASA2;MET;HSPA1B;ATF4;HSPA1A
	regulation of cellular response to stress (GO:0080135)	28/118	1.94067e-07	7.34477e-05	0	0	3.55242	54.9029	PRKN;DYRK3;HSP90AB1;ARNTL;CASP9;DNAJB1;HSPH1;BAG2;BAG3;CHORDC1;ABL1;EP300;NUP88;SLC38A2;IER3;MCL1;RANBP2;HSPA8;CREBBP;AMFR;NUP153;SIRT1;MAPKAPK2;ATF3;HSPA1B;ATF4;ATR;HSPA1A	.	Cell cycle	26/124	6.22044e-06	0.000169648	0	0	3.02429	36.2542	CDKN1A;CDKN1B;CCNH;CDC20;CCNB2;ORC6;CCND1;ABL1;E2F1;EP300;YWHAG;CREBBP;GADD45B;GADD45A;CDC6;CDC25C;GADD45G;WEE1;CDK6;TFDP2;CCNE1;CDK1;MDM2;MCM6;ANAPC1;ATR
	negative regulation of cellular macromolecule biosynthetic process (GO:2000113)	80/547	1.99586e-07	7.34477e-05	0	0	1.98003	30.546	BTG2;CDKN1A;NDUFA13;CDKN1B;DDX3X;NAB1;MIDEAS;GMNN;EIF4A3;ZBTB21;RSF1;TNF;RBM4;SCML1;BASP1;SCMH1;ENC1;DPF3;KAT7;JARID2;NKX3-1;TSPYL2;KLF10;TLE1;RBM15;SFMBT2;ARID5A;RPL13A;ARID5B;TSC1;SIRT1;RUNX2;EREG;HIC2;SFPQ;TFDP2;KAT6B;DDIT3;IRF1;CRY2;CRY1;XCL1;CLOCK;HDAC4;DDX6;ZNF350;TOB1;ARNTL;BCLAF1;RNF139;E2F1;HES1;HEXIM1;HSPA8;TCF7L2;CBX4;PHF10;SMURF2;NR1H2;EIF2AK3;SAMD4B;NR1D2;CDC6;PHC3;PER2;PER1;CENPF;BC…	.	NF-kappa B signaling pathway	23/104	8.31466e-06	0.000207866	0	0	3.23378	37.8272	GADD45B;BCL2A1;GADD45A;CCL4L2;TNFAIP3;TRAF1;TICAM1;CXCL3;PTGS2;TNF;CXCL2;NFKB1;ICAM1;GADD45G;RELB;NFKBIA;CYLD;PLAU;TRAF3;IL1B;CCL4;PRKCQ;BIRC3
	cellular response to cytokine stimulus (GO:0071345)	72/482	3.59132e-07	0.000121995	0	0	2.02577	30.0616	CDKN1A;IL1RN;NDUFA13;CDKN1B;CSF1;SLA;RORA;TNF;CXCL2;YBX3;ICAM1;ZFP36;CCND1;ZC3H12A;IL12A;TIMP1;JUNB;NKX3-1;IL10;IL1R2;MMP2;RC3H1;RPL13A;F3;SIRT1;MMP9;EREG;IL1A;PIK3CA;IL23A;PDE12;IRF4;IL1B;IRF1;FSCN1;XCL1;TNFRSF21;CCL3L1;EBI3;STK39;CXCR4;PIK3R1;PTGS2;FOXO3;HIF1A;LRP8;ZFP36L2;SOCS3;BCL2L11;SOCS1;UBB;CCL4;UBC;CCL3;ABL2;MCL1;SLC12A2;HSPA8;XBP1;CCL20;OSM;NFKB1;VEGFA;FER;IL6;LRCH1;BCL6;AXL;CLCF1;RBMX;…	.	Apoptosis	28/142	9.60646e-06	0.000221688	0	0	2.80086	32.3585	HRK;BCL2A1;DIABLO;PIK3R1;TNF;CASP9;BCL2L11;TUBA1A;AKT3;LMNA;PMAIP1;MCL1;GADD45B;GADD45A;EIF2AK3;TNFRSF10B;TNFRSF10A;TRAF1;TUBA4A;NFKB1;GADD45G;ERN1;NFKBIA;PIK3CA;DDIT3;CYCS;ATF4;BIRC3
	regulation of intrinsic apoptotic signaling pathway (GO:2001242)	17/52	3.92119e-07	0.000123686	0	0	5.52485	81.5009	NDUFA13;DDX3X;SGMS1;SIAH1;PLAUR;EIF2AK3;MMP9;HERPUD1;CYLD;BCLAF1;BCL2L11;DDIT3;PPIF;PMAIP1;NKX3-1;MCL1;GSDME	.	Transcriptional misregulation in cancer	34/192	1.31853e-05	0.000282543	0	0	2.45721	27.6102	CDKN1A;CDKN1B;FLT1;CCNT1;BCL2A1;JMJD1C;ELK4;FUT8;PLAU;NFKBIZ;NSD2;PROM1;KDM6A;BCL11B;GADD45B;GADD45A;IL1R2;TRAF1;MMP9;KLF3;RUNX2;NFKB1;MLF1;SUPT3H;GADD45G;PER2;IL6;NR4A3;BCL6;DDIT3;MDM2;REL;MET;BIRC3
	regulation of gene expression (GO:0010468)	134/1079	4.48281e-07	0.000131974	0	0	1.65284	24.1609	ZNF451;TFRC;CSF1;NAB1;NAB2;WWC2;JMJD1C;RORA;PRDM2;PRDM1;CELSR2;TNF;HMGN5;FGF9;ZC3H12A;EP300;ADNP2;SLC39A8;ZNF326;KAT7;ZNF682;OSR2;MBNL2;TLE1;SFMBT2;RC3H1;TICAM1;POU3F1;ATP1B1;HIC1;DMTF1;KAT6B;DDIT3;MYADM;PRKCQ;MATR3;EZR;CLOCK;ATF4;ZNF395;CASZ1;YTHDC1;FOXO4;HIF1A;TAF5L;PCBP2;ABL1;RBM12;SLC38A2;ZNF664;CREBBP;BTN2A2;TIPARP;DENND4A;EIF2AK3;BRAF;NR1D2;NFKB1;CLK1;HNRNPL;AFDN;IL6;RGCC;CDK6;MAFB;BCL6;SP3…	.	Influenza A	30/172	5.55935e-05	0.00111187	0	0	2.4085	23.5972	NXT1;PIK3R1;TNF;ICAM1;CASP9;SOCS3;DNAJB1;NXF1;AKT3;EP300;NLRP3;IL12A;KPNA5;KPNA2;HLA-DQA1;CREBBP;TNFRSF10B;TNFRSF10A;TICAM1;NFKB1;NFKBIA;IL1A;IL6;CDK6;PIK3CA;TRAF3;IL1B;CYCS;SLC25A4;NFKBIB
	regulation of p38MAPK cascade (GO:1900744)	14/37	5.44136e-07	0.000150181	0	0	6.91539	99.748	PHLPP1;GADD45B;GADD45A;SPHK1;GADD45G;VEGFA;CYLD;PER1;DUSP10;IL1B;ZC3H12A;RELL1;EZR;MAP3K4	.	Non-small cell lung cancer	16/72	0.00017931	0.00336207	0	0	3.24418	27.9855	CDKN1A;GADD45B;GADD45A;BRAF;PIK3R1;FOXO3;GADD45G;CASP9;EML4;CDK6;CCND1;PIK3CA;RASSF5;AKT3;E2F1;MET
	negative regulation of apoptotic process (GO:0043066)	71/485	9.29966e-07	0.000241572	0	0	1.97663	27.4516	DDX3X;TFRC;TNF;SH3RF1;BABAM2;DSTYK;HMGN5;ZC3H12A;PROK2;PIM3;PIM2;IL10;PRKCH;TLE1;RIPK2;SPHK1;PLAUR;SERPINB9;SIRT1;MMP9;TOPORS;SUPV3L1;SFPQ;PIK3CA;RASA1;PPIF;NAA35;CD44;BIRC3;PRKN;BCL2A1;PIK3R1;DLL1;THBS1;UBB;BAG3;UBC;BNIP1;FNIP1;WNT1;MCL1;BARD1;HSPA9;PLK3;XBP1;STIL;EGR3;CBX4;PLK2;SIAH2;BRAF;SOD2;NFKB1;VEGFA;KLHL20;DNAJA1;NFKBIA;NR4A2;AHI1;IL6;KRT18;AXL;CLCF1;BCL3;CDK1;CTNNB1;SPRY2;ERCC5;HSPA1B;LG…	.	Kaposi sarcoma-associated herpesvirus infection	31/193	0.000202808	0.00357897	0	0	2.1805	18.5413	CDKN1A;PIK3R1;PTGS2;CXCL3;HIF1A;CXCL2;ICAM1;CASP9;ZFP36;CCND1;UBB;AKT3;UBC;E2F1;EP300;MAP2K6;TCF7L2;GABARAPL1;CREBBP;NFATC3;TICAM1;NFKB1;VEGFA;NFKBIA;IL6;CDK6;PIK3CA;TRAF3;MAPKAPK2;CTNNB1;CYCS
	negative regulation of programmed cell death (GO:0043069)	59/381	1.24136e-06	0.000304547	0	0	2.10644	28.6462	DDX3X;TFRC;SH3RF1;BABAM2;DSTYK;HMGN5;PROK2;PIM3;PIM2;IL10;RIPK2;SPHK1;PLAUR;SERPINB9;SIRT1;MMP9;TOPORS;SUPV3L1;RASA1;PPIF;NAA35;MET;CD44;BIRC3;BCL2A1;PIK3R1;THBS1;UBB;BAG3;UBC;BNIP1;WNT1;MCL1;BARD1;HSPA9;PLK3;XBP1;STIL;EGR3;CBX4;PLK2;SIAH2;BRAF;NFKB1;VEGFA;KLHL20;NFKBIA;DNAJA1;AHI1;IL6;KRT18;AXL;BCL3;CDK1;CTNNB1;SPRY2;ERCC5;HSPA1B;HSPA1A	.	Toxoplasmosis	21/112	0.00025052	0.00417533	0	0	2.62342	21.7533	IL10;HSPA8;LAMB3;HSPA2;LAMC1;TNF;NFKB1;NFKBIA;CASP9;SOCS1;AKT3;PPIF;CYCS;IL12A;LDLR;HLA-DQA1;HSPA1B;MAP2K6;NFKBIB;BIRC3;HSPA1A
	negative regulation of intracellular signal transduction (GO:1902532)	37/198	1.50505e-06	0.000349805	0	0	2.62871	35.2423	PHLPP2;NDUFA13;PHLPP1;DGKD;DDX3X;PPM1N;WWC2;TNFAIP3;RORA;THBS1;HERPUD1;ARNTL;ARHGAP12;DEPTOR;ZC3H12A;NLRP3;FNIP1;MCL1;TLE1;UBE2B;PDE4D;PLAUR;TSC1;SIRT1;MMP9;CYLD;PER1;PPM1A;TRIM39;DDIT3;DDIT4;MYADM;PPIF;MDM2;DEPDC5;NOP53;OTUD3	.	Protein processing in endoplasmic reticulum	28/171	0.000291316	0.00459973	0	0	2.22931	18.149	PPP1R15A;PRKN;ERO1B;HSP90AB1;SAR1A;HERPUD1;SEC61A2;DNAJB2;DNAJB1;HSPH1;BAG2;MARCHF6;HSPA8;XBP1;SEC24B;EDEM1;AMFR;EIF2AK3;YOD1;HSPA2;CKAP4;ERN1;DNAJA1;DDIT3;HSPA1B;ATF4;NFE2L2;HSPA1A
	intrinsic apoptotic signaling pathway in response to DNA damage (GO:0008630)	16/51	1.60421e-06	0.000354209	0	0	5.19663	69.3381	MOAP1;BCL2A1;AEN;HIPK1;SIRT1;CRIP1;HIC1;TOPORS;CASP9;BCL2L11;DDIT4;BCL3;ABL1;E2F1;EP300;MCL1	.	Measles	24/139	0.000345647	0.00494335	0	0	2.3738	18.9194	HSPA8;CDKN1B;EIF2AK3;TNFAIP3;CBLB;PIK3R1;HSPA2;NFKB1;NFKBIA;CASP9;IL1A;IL6;CDK6;CCND1;PIK3CA;CCNE1;TRAF3;IL1B;AKT3;CYCS;IL12A;HSPA1B;NFKBIB;HSPA1A
	cellular response to DNA damage stimulus (GO:0006974)	54/350	3.87101e-06	0.000759348	0	0	2.09363	26.0908	H2AX;RPAIN;CCNK;BTG2;CDKN1A;FEN1;CASP9;BABAM2;CCND1;ZC3H12A;CTLA4;KMT5C;NSMCE3;USP3;MASTL;GNL1;SIRT1;TOPORS;HIC1;RNF169;DDIT3;PSME4;MAPKAPK2;CRY1;DTL;PPP1R15A;BCL2A1;STXBP4;ZBTB1;CRIP1;CDKN2AIP;BCL2L11;ABL1;E2F1;WNT1;MAP2K6;MCL1;BARD1;PLK3;MOAP1;UVRAG;UBE2B;GADD45A;POLA1;BCL6;BCL3;SPDYA;CDK1;NABP1;RAD1;HROB;MNAT1;NOP53;ATR	.	Chronic myeloid leukemia	16/76	0.000346035	0.00494335	0	0	3.02724	24.124	CDKN1A;CDKN1B;GADD45B;GADD45A;BRAF;PIK3R1;NFKB1;GADD45G;NFKBIA;CDK6;CCND1;PIK3CA;AKT3;ABL1;E2F1;MDM2
	cellular response to unfolded protein (GO:0034620)	11/27	3.8728e-06	0.000759348	0	0	7.79917	97.1896	PRKN;HSPA9;ERN1;HSPA8;PTPN1;BAG3;HSPA2;HSPA14;HSPA13;HSPA1B;HSPA1A	.	Colorectal cancer	17/86	0.000500042	0.00647919	0	0	2.79726	21.2615	TCF7L2;CDKN1A;GADD45B;GADD45A;BRAF;PIK3R1;AREG;EREG;GADD45G;CASP9;BCL2L11;CCND1;PIK3CA;AKT3;PMAIP1;CTNNB1;CYCS
	cellular response to topologically incorrect protein (GO:0035967)	12/32	3.95494e-06	0.000759348	0	0	6.80928	84.7111	PRKN;HSPA9;ERN1;HSPA8;PTPN1;BAG3;HSPA2;HSPA14;HSPA13;HSPA1B;DNAJC18;HSPA1A	.	Viral carcinogenesis	31/203	0.000500701	0.00647919	0	0	2.0526	15.5987	HDAC4;CDKN1A;CDKN1B;DDX3X;SRF;PIK3R1;CDC20;CCND1;EP300;PMAIP1;YWHAG;H2BC9;CREBBP;EGR2;EGR3;H4-16;TRAF1;NFKB1;NFKBIA;H2BC12;CDK6;H2BC15;PIK3CA;CCNE1;TRAF3;MAPKAPK2;RASA2;REL;CDK1;MDM2;ATF4
	regulation of transforming growth factor beta receptor signaling pathway (GO:0017015)	23/100	4.13042e-06	0.000759997	0	0	3.40252	42.1814	ZNF451;CREBBP;HSP90AB1;SMURF2;SMURF1;MTMR4;SIRT1;THBS1;VASN;SMAD7;PPM1A;ZEB2;UBB;BAMBI;PEG10;UBC;EP300;STRAP;SPRY2;SPRY1;SKIL;RNF111;HSPA1A	.	IL-17 signaling pathway	18/94	0.000518335	0.00647919	0	0	2.68965	20.3469	HSP90AB1;JUND;CCL20;TNFAIP3;CXCL3;PTGS2;CXCL2;TNF;MMP9;NFKB1;FOSL1;NFKBIA;IL6;TRAF4;TRAF3;IL1B;FOSB;MAPK6
	negative regulation of protein modification by small protein conjugation or removal (GO:1903321)	16/55	4.86624e-06	0.000859573	0	0	4.66263	57.0388	IVNS1ABP;PRR7;DCUN1D3;PRMT3;TNFAIP3;SENP2;SMAD7;DNAJA1;PER2;BAG2;CRY1;CTNNB1;SPRY2;OGT;HSPA1B;HSPA1A	.	Endometrial cancer	13/58	0.000647748	0.00777298	0	0	3.2761	24.0532	TCF7L2;CDKN1A;GADD45B;GADD45A;BRAF;PIK3R1;FOXO3;GADD45G;CASP9;CCND1;PIK3CA;AKT3;CTNNB1
	intrinsic apoptotic signaling pathway (GO:0097193)	23/102	5.89328e-06	0.00100095	0	0	3.31601	39.9304	PPP1R15A;MOAP1;CDKN1A;DDX3X;BCL2A1;DIABLO;TNFRSF10B;SELENOK;CRIP1;HIC1;TOPORS;ERN1;CASP9;BCL2L11;DDIT3;JMY;ABL1;TP53BP2;E2F1;PMAIP1;ZNF622;ATF4;MCL1	.	Herpes simplex virus 1 infection	61/498	0.000881043	0.00988523	0	0	1.59654	11.2307	ZNF891;ZNF571;ZNF570;ZNF250;ZNF44;TNF;CASP9;ZFP30;ZNF805;ZNF529;AKT3;ZNF689;IL12A;ZNF565;ZNF124;ZNF484;ZNF682;ZNF10;TSC1;TICAM1;ZNF14;PIK3CA;TRAF3;IL1B;SRSF2;ZNF317;SRSF3;SRSF6;ZNF235;ZNF597;ZNF432;BIRC3;ZNF473;ZNF791;ZNF350;ZNF23;PIK3R1;ZNF26;SOCS3;NXF1;ZNF749;ZNF548;ZNF547;ZNF667;ZNF700;HLA-DQA1;ZNF267;ZNF222;ZNF460;ZNF184;EIF2AK3;ZNF77;NFKB1;NFKBIA;IL6;ZNF417;ZNF736;ZNF614;CYCS;ZNF136;ZNF256
	positive regulation of programmed cell death (GO:0043068)	46/286	6.53297e-06	0.0010685	0	0	2.19527	26.2085	HRK;PRR7;DDX3X;DIABLO;DCUN1D3;DDX20;FOXO3;TNF;CASP9;GNA13;BCLAF1;BCL2L11;ACVR1C;PNMA1;UBB;RPS6KA2;UBC;ABL1;E2F1;CTLA4;PMAIP1;ZNF622;PHLDA1;IP6K2;BARD1;MOAP1;GADD45B;TNFRSF12A;GADD45A;SIAH1;TNFRSF10B;TNFRSF10A;SIRT1;GADD45G;TIAM2;NET1;DNAJA1;ARHGEF9;IL6;RYBP;MELK;BCL6;STK17B;JMY;CTNNB1;ATF4	.	Human T-cell leukemia virus 1 infection	32/219	0.000889671	0.00988523	0	0	1.94847	13.6873	CDKN1A;SRF;SLC2A1;GPS2;PIK3R1;TNF;ETS2;ICAM1;RELB;CDC20;ELK4;CCNB2;ZFP36;CCND1;AKT3;E2F1;EP300;HLA-DQA1;CREBBP;EGR2;IL1R2;NFATC3;NFKB1;FOSL1;NFKBIA;IL6;PIK3CA;CCNE1;SLC25A4;ANAPC1;ATF4;ATR
	regulation of RNA splicing (GO:0043484)	19/76	7.71116e-06	0.00121616	0	0	3.79172	44.6393	RBM38;RBM39;MBNL2;AHNAK;YTHDC1;PIK3R1;PTBP2;JMJD6;ERN1;CLK1;HNRNPL;POLR2A;SRSF3;ZNF326;RBM12;SLC38A2;SF1;HSPA1A;ZPR1	.	Epstein-Barr virus infection	30/202	0.000971894	0.0104131	0	0	1.98514	13.7695	CDKN1A;CDKN1B;TNFAIP3;PIK3R1;TNF;ICAM1;RELB;CASP9;BCL2L11;CCND1;AKT3;E2F1;HES1;HLA-DQA1;MAP2K6;GADD45B;GADD45A;NFKB1;GADD45G;NFKBIA;IL6;CDK6;PIK3CA;CCNE1;TRAF3;MDM2;CYCS;NFKBIE;CD44;NFKBIB
	positive regulation of RNA metabolic process (GO:0051254)	14/45	7.99032e-06	0.00121627	0	0	5.12853	60.195	WDR75;PIK3R1;WDR43;NFKB1;ERN1;SUPV3L1;IL6;POLR2A;IL1B;DXO;BUD23;SLC38A2;HSPA1A;ZPR1	.	HIF-1 signaling pathway	19/109	0.00121875	0.0126078	0	0	2.39709	16.0843	CREBBP;CDKN1A;PFKFB3;CDKN1B;FLT1;EGLN2;TFRC;SERPINE1;SLC2A1;PIK3R1;HIF1A;NFKB1;VEGFA;IL6;PIK3CA;AKT3;EP300;ALDOC;TIMP1
	negative regulation of protein ubiquitination (GO:0031397)	15/51	8.26274e-06	0.00121627	0	0	4.73332	55.3977	IVNS1ABP;PRR7;PRMT3;TNFAIP3;SENP2;SMAD7;DNAJA1;PER2;BAG2;CRY1;ABL1;SPRY2;OGT;HSPA1B;HSPA1A	.	Bladder cancer	10/41	0.00134588	0.0134588	0	0	3.65419	24.1568	CDKN1A;CCND1;MMP2;E2F1;MDM2;BRAF;THBS1;MMP9;VEGFA;HBEGF
	negative regulation of intrinsic apoptotic signaling pathway (GO:2001243)	17/64	9.62084e-06	0.0013705	0	0	4.11156	47.495	PRKN;NDUFA13;XBP1;DDX3X;PLAUR;SOD2;YBX3;MMP9;SIRT1;HERPUD1;DNAJA1;PPIF;MDM2;SNAI1;MCL1;HSPA1A;NFE2L2	.	Pathways in cancer	63/531	0.00162498	0.0157256	0	0	1.53897	9.88363	CDKN1A;CDKN1B;HSP90AB1;SLC2A1;LAMC1;CASP9;FGF9;CCND1;RASSF5;AKT3;EP300;IL12A;PIM2;NKX3-1;GSTO2;NCOA3;MMP2;TRAF1;MMP9;EML4;PIK3CA;TRAF4;TRAF3;IL23A;CCNE1;CKS2;MET;BIRC3;PTGER4;CXCR4;PIK3R1;PTGS2;HIF1A;DLL1;RASGRP3;GNA13;BCL2L11;ABL1;E2F1;PMAIP1;HES1;WNT1;TCF7L2;CREBBP;GSTM2;JAG1;EGLN2;FZD5;GADD45B;LAMB3;GADD45A;BRAF;NFKB1;EPOR;GADD45G;VEGFA;NFKBIA;IL6;CDK6;MDM2;CTNNB1;CYCS;NFE2L2
	signal transduction in response to DNA damage (GO:0042770)	15/52	1.07438e-05	0.00148264	0	0	4.60514	52.6883	H2AX;PAXIP1;GADD45A;DONSON;CASP9;SESN2;BCL3;RPA4;ABL1;E2F1;RAD1;CLSPN;WNT1;CLOCK;ATR	.	Melanoma	14/72	0.0017914	0.0167943	0	0	2.73708	17.3114	CDKN1A;GADD45B;GADD45A;BRAF;PIK3R1;GADD45G;CDK6;CCND1;FGF9;PIK3CA;AKT3;E2F1;MDM2;MET
	regulation of cellular response to heat (GO:1900034)	19/79	1.40761e-05	0.00188364	0	0	3.60154	40.2329	RANBP2;HSPA8;CREBBP;HSP90AB1;NUP153;SIRT1;DNAJB1;HSPH1;BAG2;BAG3;CHORDC1;MAPKAPK2;EP300;NUP88;CD34;IER5;HSPA1B;ATR;HSPA1A	.	Fluid shear stress and atherosclerosis	22/139	0.00194113	0.0171332	0	0	2.13589	13.3375	GSTM2;HSP90AB1;SDC4;GSTO2;IL1R2;MMP2;PIK3R1;TNF;MMP9;ACVR2B;NFKB1;KLF2;ICAM1;VEGFA;THBD;IL1A;PIK3CA;IL1B;AKT3;CTNNB1;MAP2K6;NFE2L2
	regulation of cyclin-dependent protein kinase activity (GO:1904029)	15/54	1.77616e-05	0.00230315	0	0	4.36851	47.7848	CCNK;CDKN1A;CCNJ;CDKN1B;HSP90AB1;CCNT1;CCNH;GADD45A;CDC6;CDC25C;CCNB2;CCND1;SERTAD1;CCNE1;MNAT1	.	Malaria	11/50	0.00194176	0.0171332	0	0	3.19565	19.9542	IL10;IL6;KLRK1;GYPC;IL1B;IL12A;TNF;MET;THBS1;ICAM1;THBS3
	positive regulation of transcription from RNA polymerase II promoter involved in cellular response to chemical stimulus (GO:1901522)	9/21	1.83866e-05	0.00230315	0	0	8.49954	92.678	XBP1;SESN2;CHD6;EP300;HIF1A;RUNX2;VEGFA;ATF4;NFE2L2	.	Circadian rhythm	8/31	0.00274629	0.0235396	0	0	3.93702	23.2186	PER2;PER1;BHLHE40;CRY2;CRY1;RORA;CLOCK;ARNTL
	regulation of protein ubiquitination (GO:0031396)	23/109	1.87757e-05	0.00230315	0	0	3.04494	33.1379	IVNS1ABP;PRKN;PRR7;PAXIP1;HSP90AB1;RIPK2;NSMCE3;SPHK1;PRMT3;TNFAIP3;SENP2;SMAD7;DNAJB2;DNAJA1;PER2;BAG2;UBB;CRY1;SPRY2;OGT;HSPA1B;BIRC3;HSPA1A	.	Pancreatic cancer	14/76	0.00303658	0.0248825	0	0	2.55993	14.84	CDKN1A;GADD45B;GADD45A;BRAF;PIK3R1;NFKB1;GADD45G;VEGFA;CASP9;CDK6;CCND1;PIK3CA;AKT3;E2F1
	chaperone cofactor-dependent protein refolding (GO:0051085)	10/26	1.96947e-05	0.00231707	0	0	7.08578	76.7755	HSPA9;DNAJB1;HSPA8;DNAJB5;HSPA2;HSPA14;HSPA13;HSPA1B;DNAJC18;HSPA1A	.	Hepatitis B	24/162	0.00306885	0.0248825	0	0	1.97567	11.4321	CREBBP;EGR2;CDKN1A;EGR3;DDX3X;NFATC3;BRAF;PIK3R1;TICAM1;TNF;MMP9;NFKB1;NFKBIA;CASP9;IL6;PIK3CA;CCNE1;TRAF3;AKT3;E2F1;EP300;CYCS;ATF4;MAP2K6
	negative regulation of glucocorticoid receptor signaling pathway (GO:2000323)	5/6	1.99386e-05	0.00231707	0	0	56.5579	612.118	PER1;CRY2;CRY1;CLOCK;ARNTL	.	Rheumatoid arthritis	16/93	0.00328097	0.0259024	0	0	2.3567	13.4794	FLT1;CSF1;CCL3L1;CCL20;CXCL3;CXCL2;TNF;ICAM1;VEGFA;IL1A;IL6;IL23A;IL1B;CCL3;CTLA4;HLA-DQA1
	negative regulation of transforming growth factor beta receptor signaling pathway (GO:0030512)	17/68	2.2933e-05	0.00259672	0	0	3.78825	40.4697	ZNF451;SMURF2;SMURF1;MTMR4;SIRT1;VASN;SMAD7;PPM1A;UBB;BAMBI;PEG10;UBC;STRAP;SPRY2;SPRY1;SKIL;HSPA1A	.	Renal cell carcinoma	13/69	0.00343664	0.0262514	0	0	2.631	14.9264	CDKN1A;CREBBP;EGLN2;SLC2A1;GAB1;BRAF;PIK3R1;HIF1A;VEGFA;PIK3CA;AKT3;EP300;MET
	protein deubiquitination (GO:0016579)	42/267	2.78587e-05	0.00307561	0	0	2.13438	22.3861	PRKN;USP13;USP36;USP37;INO80D;USP31;SPATA2;TNFAIP3;FOXO4;HIF1A;CDC20;BABAM2;UBB;ATXN7;ZC3H12A;UBC;EP300;NLRP3;CLSPN;BARD1;USP46;ZRANB1;MBD5;SMURF2;USP42;SIAH2;USP3;YOD1;JOSD1;SUPT3H;SMAD7;NFKBIA;ASXL1;CYLD;TRAF3;PSME4;CDK1;MDM2;OGT;OTUD1;BIRC3;OTUD3	.	Longevity regulating pathway	17/102	0.00350019	0.0262514	0	0	2.26873	12.8296	HSPA8;IRS2;TSC1;PIK3R1;HSPA2;FOXO3;SOD2;SIRT1;NFKB1;SESN3;PIK3CA;ATG101;AKT3;SESN2;HSPA1B;ATF4;HSPA1A
	modification-dependent protein catabolic process (GO:0019941)	34/201	3.53293e-05	0.00380523	0	0	2.32364	23.8191	PRKN;RNF11;KLHL15;HERPUD1;CDC20;UBB;RNF19A;UBC;FEM1C;ARIH1;RNF111;MYLIP;XBP1;UBE2H;HACE1;KLHL25;SMURF2;UBE2B;FEM1A;SMURF1;UBE2C;SIAH2;AMFR;SIAH1;RC3H1;RC3H2;TOPORS;MIB1;UBE2S;PCYOX1L;RLIM;MDM2;DTL;ANAPC1	.	Thyroid hormone signaling pathway	19/121	0.00416245	0.0304569	0	0	2.1137	11.5865	NCOA2;CREBBP;NCOA3;SLC2A1;PIK3R1;ATP1A1;ATP1B1;HIF1A;MED12L;CASP9;MED14;MED13;CCND1;MED30;PIK3CA;AKT3;MDM2;EP300;CTNNB1
	regulation of transcription initiation from RNA polymerase II promoter (GO:0060260)	16/64	3.96192e-05	0.00416568	0	0	3.78653	38.381	ZNF451;TCF7L2;CDKN1A;PAXIP1;SRF;MED26;RUNX2;NFKB1;MED23;MED14;IL6;MED13;CCND1;MED30;CDK1;CTNNB1	.	Toll-like receptor signaling pathway	17/104	0.00429645	0.030689	0	0	2.21634	12.079	CCL3L1;CCL4L2;PIK3R1;TICAM1;TNF;NFKB1;NFKBIA;IL6;PIK3CA;TRAF3;IL1B;AKT3;CCL4;CCL3;IL12A;MAP3K8;MAP2K6
	negative regulation of nucleic acid-templated transcription (GO:1903507)	63/464	4.10906e-05	0.00421991	0	0	1.80282	18.208	NDUFA13;CDKN1B;NAB1;MIDEAS;GMNN;ZBTB21;RSF1;TNF;SCML1;BASP1;SCMH1;DPF3;KAT7;JARID2;NKX3-1;KLF10;TLE1;RBM15;SFMBT2;ARID5A;ARID5B;SIRT1;RUNX2;EREG;HIC2;SFPQ;TFDP2;KAT6B;DDIT3;IRF1;CRY2;CRY1;XCL1;CLOCK;HDAC4;ZNF350;ARNTL;BCLAF1;E2F1;HES1;HEXIM1;HSPA8;TCF7L2;CBX4;PHF10;SMURF2;NR1H2;NR1D2;PHC3;PER2;PER1;CENPF;BCL6;ZNF219;BCL3;SP3;BHLHE40;RLIM;MDM2;ID3;CTNNB1;ZNF256;GZF1	.	Adherens junction	13/71	0.0044404	0.0309796	0	0	2.54	13.7592	FARP2;PTPN1;TCF7L2;CREBBP;YES1;WASL;SORBS1;AFDN;FER;SNAI1;EP300;CTNNB1;MET
	G1/S transition of mitotic cell cycle (GO:0000082)	19/85	4.23045e-05	0.00424584	0	0	3.27306	32.9617	CDK17;PLK3;CDKN1A;USP37;CDKN1B;CCNH;PLK2;CDC6;POLA1;GPR132;CDK6;CCND1;TFDP2;NASP;CCNE1;E2F1;SPDYA;PIM2;MNAT1	.	AGE-RAGE signaling pathway in diabetic complications	16/100	0.00678288	0.0443908	0	0	2.15948	10.783	CDKN1B;MMP2;SERPINE1;PIK3R1;TNF;F3;NFKB1;ICAM1;VEGFA;THBD;IL1A;IL6;CCND1;PIK3CA;IL1B;AKT3
	negative regulation of inclusion body assembly (GO:0090084)	6/10	4.55915e-05	0.00437679	0	0	16.975	169.679	DNAJB2;DNAJB1;DNAJA4;HSPA2;HSPA1B;HSPA1A	.	Viral protein interaction with cytokine and cytokine receptor	16/100	0.00678288	0.0443908	0	0	2.15948	10.783	IL10;CSF1;CCL3L1;CCL20;CCL4L2;CXCR5;TNFRSF10B;CXCR4;TNFRSF10A;CXCL3;TNF;CXCL2;IL6;CCL4;CCL3;XCL1
	regulation of T-helper 17 cell differentiation (GO:2000319)	6/10	4.55915e-05	0.00437679	0	0	16.975	169.679	NFKBIZ;ZC3H12A;RC3H1;NFKBID;RC3H2;SMAD7	.	Salmonella infection	32/249	0.00680659	0.0443908	0	0	1.67632	8.36462	CYFIP2;DCTN6;NCKAP1;HSP90AB1;AHNAK;DCTN4;WASL;TNF;FYCO1;TUBB6;TUBA1A;AKT3;NLRP3;CYTH1;MAP2K6;TCF7L2;RIPK2;TNFRSF10B;TNFRSF10A;TUBB4B;DYNLL2;TUBA4A;NFKB1;NFKBIA;DYNC1LI2;IL6;TUBB2A;PIK3CA;IL1B;CTNNB1;CYCS;BIRC3
	mitotic G1 DNA damage checkpoint signaling (GO:0031571)	16/65	4.86221e-05	0.00456841	0	0	3.70905	36.8362	PLK3;BTG2;CDKN1A;CDKN1B;CNOT6L;GADD45A;PLK2;CDC25C;RGCC;CCND1;TFDP2;SDE2;E2F1;CDK1;MDM2;EP300	.	Osteoclast differentiation	19/127	0.00707364	0.0451509	0	0	1.99561	9.88103	JUND;CSF1;PIK3R1;TNF;NFKB1;FOSL2;RELB;FOSL1;NFKBIA;SOCS3;CYLD;IL1A;SOCS1;PIK3CA;IL1B;AKT3;FOSB;JUNB;MAP2K6
	protein modification by small protein removal (GO:0070646)	42/276	6.12133e-05	0.00563162	0	0	2.05127	19.8996	PRKN;USP13;USP36;USP37;USPL1;INO80D;USP31;TNFAIP3;FOXO4;HIF1A;CDC20;BABAM2;UBB;ATXN7;ZC3H12A;UBC;EP300;NLRP3;CLSPN;BARD1;USP46;ZRANB1;MBD5;SMURF2;USP42;SIAH2;USP3;YOD1;JOSD1;SENP2;SMAD7;NFKBIA;ASXL1;CYLD;TRAF3;PSME4;CDK1;MDM2;OGT;OTUD1;BIRC3;OTUD3	.	Thyroid cancer	13728	0.00869224	0.0538752	0	0	3.12144	14.8123	TCF7L2;CDKN1A;CCND1;GADD45B;GADD45A;CTNNB1;BRAF;GADD45G
	regulation of glucocorticoid receptor signaling pathway (GO:2000322)	5/7	6.5072e-05	0.00565687	0	0	28.2774	272.595	PER1;CRY2;CRY1;CLOCK;ARNTL	.	TGF-beta signaling pathway	15/94	0.00879962	0.0538752	0	0	2.1519	10.185	TGIF1;CREBBP;SMURF2;SMURF1;BMP8A;TNF;THBS1;ACVR2B;SMAD7;ACVR1C;BAMBI;EP300;ID3;NEO1;NBL1
	positive regulation of p38MAPK cascade (GO:1900745)	9/24	6.53307e-05	0.00565687	0	0	6.79852	65.5109	GADD45B;GADD45A;SPHK1;IL1B;ZC3H12A;RELL1;MAP3K4;GADD45G;VEGFA	.	Human cytomegalovirus infection	29/225	0.00927329	0.0556397	0	0	1.68072	7.86683	PTGER4;CDKN1A;CCL3L1;CCL4L2;CXCR4;PIK3R1;PTGS2;TNF;CASP9;GNA13;CCND1;AKT3;CCL4;CCL3;E2F1;MAP2K6;NFATC3;TSC1;NFKB1;VEGFA;NFKBIA;IL6;CDK6;PIK3CA;IL1B;MDM2;CTNNB1;CYCS;ATF4
	positive regulation of transcription from RNA polymerase II promoter in response to stress (GO:0036003)	9/24	6.53307e-05	0.00565687	0	0	6.79852	65.5109	DDIT3;SESN2;CHD6;HIF1A;KLF2;ATF3;VEGFA;ATF4;NFE2L2	.	T cell receptor signaling pathway	16/104	0.00985477	0.0579693	0	0	2.06087	9.5208	IL10;NFATC3;CD8B2;CBLB;PIK3R1;TNF;NFKB1;NFKBIA;PIK3CA;AKT3;CTLA4;MAP3K8;PRKCQ;ICOS;NFKBIE;NFKBIB
	DNA damage response, signal transduction by p53 class mediator (GO:0030330)	17/74	7.32994e-05	0.00622481	0	0	3.38838	32.2606	PLK3;BTG2;CDKN1A;CDKN1B;CNOT6L;PAXIP1;GADD45A;PLK2;CDC25C;RGCC;TFDP2;SESN2;BCL3;E2F1;CDK1;MDM2;EP300	.	MicroRNAs in cancer	37/310	0.0122877	0.0708907	0	0	1.54073	6.77791	HDAC4;CDKN1A;CDKN1B;CDCA5;IRS2;PIK3R1;PTGS2;SLC7A1;THBS1;BCL2L11;SOCS1;CCND1;PLAU;STMN1;ABL1;E2F1;TIMP3;EP300;MCL1;CREBBP;CDC25C;SIRT1;MMP9;NFKB1;VEGFA;EFNA1;ZEB2;CDK6;PIK3CA;CCNE1;DDIT4;FSCN1;MDM2;SPRY2;EZR;MET;CD44
	mitotic cell cycle phase transition (GO:0044772)	34/209	7.92547e-05	0.00660356	0	0	2.21644	20.9295	CDKN1A;USP37;CCNJ;CDKN1B;CCNH;CCNB2;GPR132;TUBA1A;CCND1;E2F1;PIM2;PHLDA1;YWHAG;CLASP1;PLK3;UBE2C;PLK2;HAUS6;TUBB4B;CDC25C;MASTL;TUBA4A;WEE1;MELK;CDK6;NASP;CCNE1;UBE2S;AKAP9;SPDYA;CDK1;MNAT1;CEP43;ANAPC1	.	Insulin resistance	16/108	0.0139373	0.0785182	0	0	1.97083	8.42174	PTPN1;NR1H2;SLC2A1;IRS2;PIK3R1;TNF;NFKB1;NFKBIA;SOCS3;IL6;PIK3CA;RPS6KA2;AKT3;PRKCQ;SLC27A2;OGT
	regulation of DNA-templated transcription, initiation (GO:2000142)	15/61	8.41218e-05	0.00683798	0	0	3.70232	34.7398	TCF7L2;CDKN1A;MED26;RUNX2;NFKB1;MED23;FOSL1;MED14;BCLAF1;IL6;MED13;CCND1;MED30;CDK1;CTNNB1	.	PI3K-Akt signaling pathway	41/354	0.0141333	0.0785182	0	0	1.48956	6.34438	PHLPP2;CDKN1A;CDKN1B;PHLPP1;FLT1;HSP90AB1;CSF1;PIK3R1;LAMC1;FOXO3;AREG;THBS1;THBS3;CASP9;BCL2L11;CCND1;FGF9;AKT3;YWHAG;MCL1;LAMB3;ITGA1;OSM;TSC1;NFKB1;EPOR;EREG;VEGFA;EFNA1;NR4A1;IL6;CDK6;PIK3CA;CCNE1;DDIT4;COL6A1;MDM2;COL9A3;PKN2;MET;ATF4
	negative regulation of mitotic cell cycle (GO:0045930)	13/48	8.51651e-05	0.00683798	0	0	4.21443	39.4931	IL10;BTG3;BTG2;BTG1;CDKN1B;PLK2;ZFP36L2;WEE1;RGCC;BCL6;CTNNB1;NABP1;NKX3-1	.	Proteoglycans in cancer	26/205	0.0160159	0.0859445	0	0	1.64842	6.81484	CDKN1A;SDC4;PIK3R1;HIF1A;TNF;THBS1;CCND1;PLAU;AKT3;TIMP3;WNT1;FZD5;MMP2;GAB1;PLAUR;RRAS2;BRAF;MMP9;VEGFA;PIK3CA;MDM2;CTNNB1;EZR;MET;CD44;HBEGF
	regulation of inclusion body assembly (GO:0090083)	6/11	9.33664e-05	0.00736261	0	0	13.5793	126.002	DNAJB2;DNAJB1;DNAJA4;HSPA2;HSPA1B;HSPA1A	.	Breast cancer	20/147	0.016043	0.0859445	0	0	1.78563	7.37907	TCF7L2;CDKN1A;JAG1;FZD5;GADD45B;GADD45A;NCOA3;BRAF;PIK3R1;DLL1;GADD45G;CDK6;CCND1;FGF9;PIK3CA;AKT3;E2F1;CTNNB1;HES1;WNT1
	regulation of cellular macromolecule biosynthetic process (GO:2000112)	62/468	9.6622e-05	0.00748566	0	0	1.75075	16.1852	USP37;BTG1;NAB1;GMNN;NAB2;WWC2;JMJD1C;RORA;PRDM2;CELSR2;HMGN5;ZNF280C;EP300;SLC39A8;KAT7;MYBL2;NKX3-1;ZNF682;NCOA2;TSC1;HIC1;MLF1;SUPT3H;MED23;SFPQ;DMTF1;KAT6B;DDIT3;PRKCQ;CLOCK;ATF4;USP13;ZNF395;CASZ1;ZNF350;NOLC1;FOXO4;SPTY2D1;FOXO3;HIF1A;TAF5L;ARNTL;POLR2A;NSD2;ATXN1L;ABL1;E2F1;ZNF664;CREBBP;ZNF460;NFYA;DENND4A;NR1D2;ACVR2B;PUM3;RYBP;MAFB;ZNF219;SP3;ZNF736;BHLHE40;GZF1	.	Glioma	27729	0.0176152	0.0904874	0	0	2.15661	8.71053	CDKN1A;CDK6;CCND1;PIK3CA;GADD45B;GADD45A;AKT3;E2F1;MDM2;BRAF;PIK3R1;GADD45G
	regulation of protein modification by small protein conjugation or removal (GO:1903320)	8/20	9.83618e-05	0.00748907	0	0	7.55048	69.6672	PRKN;DNAJB2;HSP90AB1;DCUN1D3;DCUN1D2;HIF1A;HSPA1B;HSPA1A	.	Pathogenic Escherichia coli infection	25/197	0.0178	0.0904874	0	0	1.64913	6.64361	CYFIP2;NCKAP1;WASL;TNF;CASP9;GNA13;TUBB6;TUBA1A;ABL1;NLRP3;MYH10;CYTH1;SEC24B;TNFRSF10B;TNFRSF10A;TUBB4B;TUBA4A;NFKB1;NFKBIA;IL6;TUBB2A;IL1B;CYCS;EZR;NFKBIB
	'de novo' posttranslational protein folding (GO:0051084)	10/31	0.000112743	0.00829788	0	0	5.39722	49.0629	HSPA9;DNAJB1;HSPA8;DNAJB5;HSPA2;HSPA14;HSPA13;HSPA1B;DNAJC18;HSPA1A	.	Amoebiasis	15/102	0.0180062	0.0904874	0	0	1.95317	7.84595	IL10;ARG2;LAMB3;IL1R2;SERPINB9;PIK3R1;LAMC1;CXCL3;TNF;CXCL2;NFKB1;IL6;PIK3CA;IL1B;IL12A
	positive regulation of RNA splicing (GO:0033120)	10/31	0.000112743	0.00829788	0	0	5.39722	49.0629	ERN1;DAZAP1;RBMXL1;POLR2A;TRA2A;PIK3R1;SLC38A2;RBMX;HSPA1A;ZPR1	.	Hepatocellular carcinoma	22/168	0.0180975	0.0904874	0	0	1.70892	6.85615	TCF7L2;GSTM2;CDKN1A;FZD5;GADD45B;PHF10;GSTO2;GADD45A;GAB1;BRAF;PIK3R1;GADD45G;CDK6;CCND1;PIK3CA;AKT3;E2F1;DPF3;CTNNB1;WNT1;MET;NFE2L2
	DNA damage response, signal transduction by p53 class mediator resulting in cell cycle arrest (GO:0006977)	14/56	0.000118785	0.00859928	0	0	3.78308	34.1922	PLK3;BTG2;CDKN1A;CDKN1B;CNOT6L;GADD45A;PLK2;CDC25C;RGCC;TFDP2;E2F1;CDK1;MDM2;EP300	.	Pertussis	28095	0.0194179	0.0952005	0	0	2.1228	8.36713	IL10;IL1A;IL6;IL23A;CFL2;IL1B;IRF1;NLRP3;IL12A;TICAM1;TNF;NFKB1
	cell cycle G1/S phase transition (GO:0044843)	15/63	0.00012476	0.00888611	0	0	3.54767	31.8904	PLK3;CDKN1A;USP37;CDKN1B;CCNH;PLK2;GPR132;CDK6;CCND1;NASP;CCNE1;E2F1;SPDYA;PIM2;MNAT1	.	ErbB signaling pathway	13/85	0.0196895	0.0952005	0	0	2.04455	8.0303	CDKN1A;CDKN1B;GAB1;CBLB;BRAF;PIK3R1;AREG;EREG;PIK3CA;AKT3;ABL1;ABL2;HBEGF
	negative regulation of multicellular organismal process (GO:0051241)	34/214	0.000127434	0.0089325	0	0	2.15428	19.3194	PTGER4;SRF;WWC2;NPR3;ADM;TNF;ARNTL;RAB11FIP1;DUSP10;ACVR1C;TIMP1;MAP2K6;NKX3-1;IL10;TLE3;BTN2A2;NR1H2;PLCL1;ARRDC3;CYP51A1;ATP2B1;MCC;ACVR2B;VASN;SMAD7;EFNA1;KLF7;RGCC;DDIT3;IL1B;SPRY2;SPRY1;SRSF6;ATF4	.	Human papillomavirus infection	38/331	0.0199921	0.0952005	0	0	1.47366	5.76556	PTGER4;CDKN1A;CDKN1B;MAML1;PIK3R1;LAMC1;PTGS2;TNF;THBS1;THBS3;PARD6A;CCND1;AKT3;E2F1;EP300;HES1;WNT1;HES4;TCF7L2;CREBBP;JAG1;FZD5;LAMB3;ITGA1;TSC1;TICAM1;NFKB1;VEGFA;CDK6;PIK3CA;CCNE1;TRAF3;IRF1;COL6A1;MDM2;CTNNB1;COL9A3;ATR
	cytokine-mediated signaling pathway (GO:0019221)	77/621	0.000136155	0.00939469	0	0	1.62584	14.4728	CDKN1A;IL1RN;CDKN1B;CSF1;RPLP0;SLA;IRS2;RORA;IFI30;CXCL3;TNF;CXCL2;ICAM1;CA1;CCND1;MAP3K8;IL12A;TIMP1;JUNB;APPL2;IL10;SERPINB2;TNFRSF12A;GPR35;RIPK2;IL1R2;MMP2;TRAF1;F3;SIRT1;MMP9;EREG;IL1A;PIK3CA;TRAF3;IL23A;IRF4;IL1B;IRF1;PSME4;PELI1;FSCN1;XCL1;CD44;BIRC3;CCL3L1;EBI3;PIK3R1;PTGS2;FOXO3;HIF1A;LRP8;SOCS3;BCL2L11;SOCS1;UBB;CCL4;UBC;CCL3;ABL2;HLA-DQA1;IP6K2;MCL1;HSPA9;HSPA8;CCL20;OSM;SOD2;NFKB1;VEG…	.	Phosphatidylinositol signaling system	14/97	0.0252484	0.11664	0	0	1.91005	7.02704	DGKE;MTMR2;DGKD;IPMK;MTMR8;PIK3R1;MTMR4;INPP5A;PPIP5K1;PIK3CA;PIP5K1B;PI4K2A;DGKH;IP6K2
	regulation of vascular wound healing (GO:0061043)	5/8	0.00016183	0.0109945	0	0	18.8506	164.546	SLC12A2;XBP1;SERPINE1;TNFAIP3;TNF	.	Cytokine-cytokine receptor interaction	34/295	0.0252721	0.11664	0	0	1.4791	5.44019	IL1RN;CSF1;CCL3L1;CCL4L2;EBI3;CXCR5;CXCR4;CXCL3;TNF;CXCL2;CXCL16;ACVR1C;CCL4;CCL3;IL12A;RELT;IL10;TNFRSF12A;CCL20;IL1R2;BMP8A;OSM;TNFRSF10B;TNFRSF10A;ACVR2B;EPOR;IL1A;IL6;IL23A;IL1B;CLCF1;TNFSF9;XCL1;TNFRSF21
	positive regulation of glial cell proliferation (GO:0060252)	4/5	0.000205047	0.013123	0	0	45.2185	384.007	IL6;PRKCH;IL1B;TNF	.	Glycosaminoglycan biosynthesis	19603	0.026164	0.118927	0	0	2.31402	8.43082	HS3ST3B1;FUT8;B4GALT1;B3GNT7;CSGALNACT2;UST;XYLT1;ST3GAL1;B4GALT4
	protein K29-linked deubiquitination (GO:0035523)	4/5	0.000205047	0.013123	0	0	45.2185	384.007	USP13;ZRANB1;TNFAIP3;YOD1	.	PD-L1 expression and PD-1 checkpoint pathway in cancer	13/89	0.0277951	0.124455	0	0	1.93651	6.93833	NFATC3;PIK3R1;TICAM1;HIF1A;NFKB1;EML4;NFKBIA;PIK3CA;AKT3;PRKCQ;NFKBIE;MAP2K6;NFKBIB
	regulation of fever generation (GO:0031620)	4/5	0.000205047	0.013123	0	0	45.2185	384.007	IL1B;PTGS2;TNF;PTGES	.	Autophagy	18/137	0.0294878	0.126567	0	0	1.71372	6.03878	UVRAG;GABARAPL1;EIF2AK3;RRAS2;IRS2;TSC1;PIK3R1;MTMR4;HIF1A;ERN1;DEPTOR;PIK3CA;ATG101;ATG16L1;TP53INP2;AKT3;DDIT4;PRKCQ
	regulation of germinal center formation (GO:0002634)	4/5	0.000205047	0.013123	0	0	45.2185	384.007	BCL6;FOXJ1;RC3H1;TNFAIP3	.	Yersinia infection	18/137	0.0294878	0.126567	0	0	1.71372	6.03878	IL10;NFATC3;CD8B2;PIK3R1;WASL;TICAM1;TNF;NFKB1;NFKBIA;IL6;PIK3CA;RPS6KA2;IL1B;AKT3;NLRP3;PIP5K1B;PKN2;MAP2K6
	regulation of endoplasmic reticulum stress-induced intrinsic apoptotic signaling pathway (GO:1902235)	8/22	0.000215412	0.0135894	0	0	6.47114	54.6355	PRKN;XBP1;BCL2L11;DDIT3;EIF2AK3;PMAIP1;HERPUD1;HSPA1A	.	Hematopoietic cell lineage	14/99	0.0295323	0.126567	0	0	1.8649	6.56868	CSF1;TFRC;IL1R2;ITGA1;CD8B2;TNF;EPOR;IL1A;IL6;IL1B;CD34;HLA-DQA1;CD44;CD55
	positive regulation of gene expression (GO:0010628)	62/482	0.000220943	0.013742	0	0	1.69107	14.2348	DDX3X;TFRC;CSF1;EIF4A3;TENT4A;TNF;TENT4B;SCAMP5;HMGN5;FGF9;ZC3H12A;EP300;CD34;NKX3-1;IL10;OSR2;TLE1;SERPINB9;TICAM1;POU3F1;F3;MED26;EREG;MED23;ERN1;IL1A;IL1B;POLR1C;POLR1F;POLR1H;EZR;ATF4;PRKN;PTGER4;DDX21;PIK3R1;HIF1A;THBS1;TTN;TAF1D;POLR2A;CCL3;E2F1;SLC38A2;YTHDF3;CRTAM;EIF2AK3;BRAF;EEF2;VEGFA;AFDN;IL6;RGCC;DNAJA4;BCL3;SPRY2;CPEB3;ZCCHC4;HSPA1B;HSPA1A;NFE2L2;ZPR1	.	Hepatitis C	20/157	0.0303978	0.128441	0	0	1.65438	5.77939	CDKN1A;EIF2AK3;BRAF;PIK3R1;TICAM1;TNF;NFKB1;NFKBIA;CASP9;SOCS3;CDK6;CCND1;PIK3CA;TRAF3;AKT3;E2F1;CYCS;CTNNB1;LDLR;YWHAG
	microtubule cytoskeleton organization involved in mitosis (GO:1902850)	23/128	0.000250735	0.0153784	0	0	2.49136	20.6561	DCTN6;RANBP2;STIL;AHCTF1;TNKS;PLK2;MIS12;KNL1;DYNLL2;CENPC;CDC20;EML4;DYNC1LI2;KIF18A;CENPF;KIF4A;STMN1;SBDS;CENPN;B9D2;CENPP;CLASP1;NDEL1	.	Gastric cancer	19/149	0.0338909	0.141212	0	0	1.6559	5.60456	TCF7L2;CDKN1A;CDKN1B;FZD5;GADD45B;GADD45A;GAB1;BRAF;PIK3R1;GADD45G;CCND1;FGF9;PIK3CA;CCNE1;AKT3;E2F1;CTNNB1;WNT1;MET
	negative regulation of gene expression (GO:0010629)	45/322	0.000257614	0.0155839	0	0	1.85572	15.3358	PRKN;PTGER4;DDX6;BTG2;DDX3X;EIF4A3;HIF1A;TNF;TOB1;ZFP36L2;ZC3H12D;RBM4;ZFP36;RNF139;NOCT;ZC3H12A;ENC1;CCL3;JARID2;CD34;NKX3-1;IL10;BTN2A2;TIPARP;SFMBT2;EIF2AK3;H4-16;SAMD4B;RPL13A;TSC1;ATP2B1;SIRT1;NFKB1;PTBP2;VEGFA;ERN1;SLC7A5;RGCC;REL;MYADM;DXO;CPEB3;HSPA1B;LGMN;HSPA1A	.	Ubiquitin mediated proteolysis	18/140	0.0355872	0.146249	0	0	1.67131	5.57509	PRKN;UBE2H;FBXW8;SMURF2;UBE2B;SMURF1;UBE2C;SIAH1;CBLB;CDC20;SOCS3;SOCS1;UBB;UBE2S;UBC;MDM2;ANAPC1;BIRC3
	cellular response to vascular endothelial growth factor stimulus (GO:0035924)	10/34	0.000265967	0.0158718	0	0	4.72179	38.8705	ERN1;NR4A1;FLT1;EGR3;PIK3CA;SPHK1;MAPKAPK2;GAB1;SPRY2;VEGFA	.	Inflammatory bowel disease	24016	0.0366015	0.147685	0	0	2.05694	6.80366	IL10;IL1A;IL6;IL23A;IL1B;RORA;IL12A;TNF;HLA-DQA1;NFKB1
	regulation of cyclin-dependent protein serine/threonine kinase activity (GO:0000079)	17/82	0.000277703	0.0163511	0	0	2.97005	24.3216	HEXIM1;CCNK;CDKN1A;CCNJ;CDKN1B;CCNT1;CCNH;GADD45A;CDC6;CDC25C;CCNB2;RGCC;CCND1;SERTAD1;CCNE1;SPDYA;MNAT1	.	Chagas disease	14/102	0.0369213	0.147685	0	0	1.80103	5.94153	IL10;CCL3L1;SERPINE1;PIK3R1;TICAM1;TNF;NFKB1;NFKBIA;IL6;PIK3CA;IL1B;AKT3;CCL3;IL12A
	negative regulation of hydrogen peroxide-induced cell death (GO:1903206)	6/13	0.0003006	0.0172568	0	0	9.69844	78.6518	IL10;NR4A3;PYCR1;MET;PDE8A;NFE2L2	.	Sphingolipid metabolism	18111	0.0429541	0.169555	0	0	2.20641	6.94494	SMPD2;UGT8;NEU4;CERK;SGMS1;SPHK1;NEU1;GLA
	regulation of inflammatory response (GO:0050727)	32/206	0.0003009	0.0172568	0	0	2.09554	16.9922	PTGER4;TNFAIP6;SERPINE1;GPS2;SPATA2;TNFAIP3;RORA;PTGS2;METRNL;TNF;NFKBIZ;CCL3;NLRP3;IL10;FEM1A;SPHK1;OSM;NR1D2;MMP9;NFKBIA;CYLD;LACC1;GPRC5B;IL6;BCL6;IL23A;IL1B;NINJ1;XCL1;VAMP2;PTGES;BIRC3	.	Acute myeloid leukemia	24746	0.0438493	0.170842	0	0	1.98455	6.20567	PER2;TCF7L2;CCND1;PIK3CA;BCL2A1;AKT3;BRAF;PIM2;PIK3R1;NFKB1
	regulation of nucleic acid-templated transcription (GO:1903506)	56/430	0.000319005	0.0180606	0	0	1.71312	13.7911	BTG1;NAB1;NAB2;WWC2;JMJD1C;RORA;PRDM2;CELSR2;HMGN5;ZNF280C;EP300;SLC39A8;KAT7;MYBL2;NKX3-1;ZNF682;NCOA2;HIC1;MLF1;SUPT3H;MED23;SFPQ;DMTF1;KAT6B;DDIT3;PRKCQ;CLOCK;ATF4;USP13;ZNF395;CASZ1;ZNF350;FOXO4;SPTY2D1;HIF1A;TAF5L;ARNTL;POLR2A;NSD2;ATXN1L;ABL1;E2F1;ZNF664;CREBBP;ZNF460;NFYA;DENND4A;NR1D2;ACVR2B;RYBP;MAFB;ZNF219;SP3;ZNF736;BHLHE40;GZF1	.	Ferroptosis	15158	0.0458032	0.176164	0	0	2.32754	7.17673	MAP1LC3A;TFRC;FTH1;PCBP2;SLC3A2;SLC39A8;SAT1
	ubiquitin-dependent protein catabolic process (GO:0006511)	48/354	0.000333067	0.0183336	0	0	1.79236	14.3517	PRKN;RNF11;KLHL15;TNFAIP3;HERPUD1;ARNTL;CDC20;ANKRD9;RNF19A;PCBP2;FEM1C;ARIH1;RNF111;MARCHF6;MYLIP;XBP1;ZRANB1;UBE2H;HACE1;KLHL25;SMURF2;UBE2B;FEM1A;SMURF1;UBE2C;SIAH2;AMFR;SIAH1;VPS37C;RC3H1;VPS37B;SIRT1;RC3H2;TOPORS;MIB1;KLHL20;KBTBD6;UBE2S;DDIT3;PSME4;PELI1;RLIM;MDM2;CTNNB1;CLOCK;DTL;ANAPC1;NFE2L2	.	Leishmaniasis	28430	0.0469184	0.176164	0	0	1.88556	5.76857	IL10;NFKBIA;IL1A;MARCKSL1;IL1B;IL12A;PTGS2;TNF;HLA-DQA1;NFKB1;NFKBIB
	positive regulation of response to endoplasmic reticulum stress (GO:1905898)	7/18	0.000334417	0.0183336	0	0	7.20323	57.6483	USP13;ERN1;XBP1;BCL2L11;DDIT3;PMAIP1;PIK3R1	.	Non-alcoholic fatty liver disease	19/155	0.0477111	0.176164	0	0	1.58232	4.81436	NDUFA13;XBP1;EIF2AK3;IRS2;PIK3R1;TNF;NFKB1;ERN1;SOCS3;IL1A;IL6;BCL2L11;PIK3CA;DDIT3;IL1B;AKT3;CYCS;NDUFV2;ATF4
	regulation of glial cell proliferation (GO:0060251)	5/9	0.000339627	0.0183336	0	0	14.1372	112.923	IL6;PRKCH;IL1B;HES1;TNF	.	Mitophagy	25112	0.0478146	0.176164	0	0	1.95022	5.92951	PRKN;GABARAPL1;UBB;UBC;E2F1;EIF2AK3;RRAS2;FOXO3;HIF1A;ATF4
	negative regulation of wound healing (GO:0061045)	9/29	0.000344586	0.0183336	0	0	5.0975	40.6432	SLC12A2;THBD;SERPINE2;SERPINE1;CASK;TFPI;TNF;CD34;CLASP1	.	Notch signaling pathway	21794	0.0481514	0.176164	0	0	2.03567	6.175	TLE3;CREBBP;TLE1;JAG1;MAML1;ATXN1L;EP300;HES1;DLL1
	regulation of ubiquitin-protein transferase activity (GO:0051438)	9/29	0.000344586	0.0183336	0	0	5.0975	40.6432	ARRDC4;FEM1A;DCUN1D3;ARRDC3;ABL1;DCUN1D2;RPS2;TOPORS;SMAD7	.	Antigen processing and presentation	28795	0.0507746	0.183523	0	0	1.85731	5.53546	HSPA8;HSP90AB1;NFYA;CD8B2;HSPA2;IFI30;TNF;HLA-DQA1;HSPA1B;HSPA1A;LGMN
	response to UV (GO:0009411)	19/99	0.000356427	0.0187379	0	0	2.69821	21.4221	CREBBP;FEN1;UBE2B;NSMCE3;DCUN1D3;ZBTB1;CASP9;MFAP4;CCND1;BCL3;SDE2;EP300;IL12A;ERCC5;DTL;MAP3K4;MAP4K3;ATF4;ATR	.	Adipocytokine signaling pathway	25477	0.0520135	0.183635	0	0	1.91707	5.66733	NFKBIA;SOCS3;AKT3;SLC2A1;IRS2;PRKCQ;NFKBIE;TNF;NFKB1;NFKBIB
	positive regulation of nucleic acid-templated transcription (GO:1903508)	64/511	0.000369186	0.0191803	0	0	1.63981	12.9614	RORA;RSF1;TNF;NAT14;ETS2;ZXDA;MED14;MED13;HMGN5;EP300;PIM2;RNF111;NKX3-1;IL10;OSR2;POU3F1;RUNX2;SUPT3H;JMJD6;LBHD1;PPM1A;ELF1;ELF2;KAT6B;IRF4;DDIT3;IL1B;IRF1;CLOCK;ATF4;HDAC4;CASZ1;KDM3A;FOXO3;HIF1A;RLF;ARNTL;MED30;TP53INP2;TP53INP1;E2F1;HES1;WNT1;MAP3K2;CREBBP;EGR2;NFYA;BICRAL;NR1H2;SS18L1;NR1D2;HNRNPAB;NFKB1;KLF2;KLF6;IL6;RYBP;MAFB;BAMBI;PITHD1;BCL3;SP3;SNAI1;CTNNB1	.	Th17 cell differentiation	14/107	0.05203	0.183635	0	0	1.70373	5.03612	HSP90AB1;NFATC3;RORA;HIF1A;NFKB1;NFKBIA;IL6;IL23A;IRF4;IL1B;PRKCQ;NFKBIE;HLA-DQA1;NFKBIB
	negative regulation of transmembrane receptor protein serine/threonine kinase signaling pathway (GO:0090101)	20/108	0.00041226	0.0211691	0	0	2.58249	20.1276	ZNF451;SMURF2;SMURF1;MTMR4;SIRT1;ACVR2B;VASN;SMAD7;PPM1A;UBB;BAMBI;PEG10;UBC;STRAP;SPRY2;SPRY1;WNT1;NBL1;SKIL;HSPA1A	.	RNA degradation	29160	0.0548386	0.191298	0	0	1.8299	5.31286	HSPA9;BTG3;DDX6;BTG2;BTG1;CNOT6L;TENT4A;TOB2;DCP1A;TENT4B;TOB1
	negative regulation of fat cell differentiation (GO:0045599)	10/36	0.000443673	0.0225202	0	0	4.3581	33.6464	ASXL1;IL6;E2F1;GPS2;RORA;WNT1;TNF;SIRT1;ZFP36L2;ARNTL	.	Prolactin signaling pathway	25842	0.0564499	0.194655	0	0	1.88501	5.41828	SOCS3;SOCS1;CCND1;PIK3CA;IRF1;AKT3;PIK3R1;FOXO3;SOCS4;NFKB1
	proteasome-mediated ubiquitin-dependent protein catabolic process (GO:0043161)	44/321	0.000457329	0.0229496	0	0	1.81334	13.9447	PRKN;KLHL15;HERPUD1;ARNTL;CDC20;ANKRD9;DNAJB2;UBB;TMEM67;PCBP2;UBC;DNAJB9;FEM1C;RNF175;MARCHF6;HACE1;SMURF2;UBE2B;FEM1A;SGTB;RHBDD2;SMURF1;UBE2C;EDEM1;SIAH2;AMFR;SIAH1;YOD1;SIRT1;TOPORS;DNAJC18;KLHL20;RNF103;KBTBD6;UBE2S;DDIT3;PSME4;PELI1;CDK1;MDM2;CTNNB1;CLOCK;ANAPC1;NFE2L2	.	Neurotrophin signaling pathway	15/119	0.0596021	0.203189	0	0	1.63238	4.60342	RIPK2;GAB1;BRAF;PIK3R1;FOXO3;NFKB1;NFKBIA;PIK3CA;RPS6KA2;AKT3;MAPKAPK2;ABL1;NFKBIE;ATF4;NFKBIB
	negative regulation of cellular process (GO:0048523)	69/566	0.000479833	0.0237117	0	0	1.59071	12.1563	BTG3;BTG2;CDKN1A;NDUFA13;BTG1;CDKN1B;DDX3X;GMNN;ADARB1;RND1;FTH1;RPS6KA2;SESN2;ADNP2;PIM2;CD34;PDE8A;APPL2;NKX3-1;TSPYL2;IL10;KLF10;ITGA1;CASK;TSC1;SIRT1;EREG;IL1A;PDE12;IL1B;ALDH1A2;IRF1;RASA1;SRSF6;TNFRSF21;PRKN;CCL3L1;DCUN1D3;FOXO4;DLL1;TOB1;CDKN2AIP;DNAJB2;ORC6;RNF139;SERTAD2;TP53INP1;LMNA;TP53BP2;WNT1;IP6K2;FKTN;BTN2A2;NR1H2;EIF2AK3;OSM;CDC6;SOD2;DCBLD2;NR4A1;IL6;CDK6;RGCC;BCL6;DLC1;CTNNB1;H…	.	Coronavirus disease	26/232	0.0603034	0.20327	0	0	1.43024	4.01663	RPLP1;RPLP0;C5AR1;RPL36A;PIK3R1;TNF;RPS17;RPS16;RPS18;RPL13;NLRP3;IL12A;RPS2;RPS5;RPL22;RPL13A;NFKB1;NFKBIA;IL6;PIK3CA;TRAF3;IL1B;FAU;RPL28;HBEGF;NFKBIB
	negative regulation of cell population proliferation (GO:0008285)	50/379	0.000483254	0.0237117	0	0	1.73651	13.2582	BTG3;BTG2;CDKN1A;BTG1;CDKN1B;TNFAIP3;ADARB1;DUSP10;FTH1;RPS6KA2;IL12A;PIM2;EMD;APPL2;NKX3-1;IL10;KLF10;ITGA1;TSC1;MTSS1;EREG;IL1A;IL1B;ALDH1A2;IRF1;CCL3L1;FOXO4;DLL1;TOB1;DNAJB2;ACVR1C;RNF139;LMNA;TP53INP1;E2F1;HES1;FKTN;OSM;CDC6;MCC;SOD2;PER2;IL6;CDK6;RGCC;DLC1;CTNNB1;HSPA1B;GSDME;HSPA1A	.	Progesterone-mediated oocyte maturation	13/100	0.0621791	0.207264	0	0	1.69065	4.69618	HSP90AB1;BRAF;PIK3R1;CDC25C;CCNB2;PIK3CA;RPS6KA2;AKT3;CDK1;SPDYA;CPEB3;CPEB2;ANAPC1
	inflammatory response (GO:0006954)	34/230	0.000506214	0.0243179	0	0	1.97668	15.0001	PTGER4;HDAC4;IL1RN;CCL3L1;TNFAIP6;C5AR1;CXCR4;ADM;CXCL3;TNF;CXCL2;THBS1;RELB;ADGRE5;CCRL2;CCL4;CCL3;PROK2;OLR1;NLRP3;HNRNPA0;RIPK2;CCL20;NFATC3;NFKB1;IL1A;TPST1;IL6;IL1B;MAPKAPK2;REL;XCL1;PTX3;CD44	.	African trypanosomiasis	13667	0.0764542	0.248464	0	0	2.18711	5.6232	IL10;IL6;IL1B;IL12A;TNF;ICAM1
	transcription, DNA-templated (GO:0006351)	33/221	0.000506622	0.0243179	0	0	1.99981	15.174	CCNK;ELL;CCNT1;CCNH;RNMT;DDX21;RSF1;FOXO3;NAT14;TAF5L;POLR2A;NOCT;E2F1;SMN1;IVNS1ABP;XBP1;NFYA;TAF13;EAF1;MLF1;TOPORS;NFKB1;EREG;NR4A2;BCL3;POLR1C;PAF1;TRIP13;MNAT1;RBMX;SLC25A33;ATF4;NFKBIB	.	mTOR signaling pathway	18/154	0.0765154	0.248464	0	0	1.49811	3.85054	FZD5;TSC1;BRAF;SLC3A2;CASTOR1;PIK3R1;TNF;SLC7A5;DEPTOR;PIK3CA;RPS6KA2;AKT3;SESN2;DDIT4;RICTOR;WNT1;DEPDC5;FNIP1
	regulation of protein catabolic process (GO:0042176)	19/102	0.000527071	0.0250274	0	0	2.60025	19.6272	BARD1;PRKN;NDUFA13;HACE1;CDKN1B;EGLN2;SMURF2;SMURF1;TIPARP;PLK2;ODC1;CYP51A1;CENATAC;TNFAIP3;TNF;AZIN1;MDM2;FAM83D;DTL	.	Type II diabetes mellitus	16984	0.0770239	0.248464	0	0	2.02858	5.20055	SOCS3;SOCS1;PIK3CA;IRS2;PIK3R1;TNF;SOCS4
	centromere complex assembly (GO:0034508)	10/37	0.000564069	0.0262203	0	0	4.19646	31.3909	CENPF;NASP;MIS12;HJURP;H4-16;RSF1;CENPN;KNL1;CENPP;CENPC	.	Estrogen signaling pathway	16/137	0.0913713	0.29161	0	0	1.49611	3.57992	HSPA8;NCOA2;HSP90AB1;MMP2;NCOA3;KRT23;PIK3R1;HSPA2;MMP9;KRT18;PIK3CA;AKT3;HSPA1B;ATF4;HBEGF;HSPA1A
	regulation of vascular associated smooth muscle cell proliferation (GO:1904705)	10/37	0.000564069	0.0262203	0	0	4.19646	31.3909	IL10;ERN1;CDKN1A;CDKN1B;NR4A3;FGF9;MMP2;SOD2;MEF2D;MMP9	.	mRNA surveillance pathway	36130	0.100863	0.318514	0	0	1.57786	3.6196	PNN;HBS1L;NXF1;DAZAP1;NXT1;CLP1;PCF11;RNMT;EIF4A3;ETF1;PELO;WDR33
	positive regulation of extrinsic apoptotic signaling pathway via death domain receptors (GO:1902043)	4/6	0.000575268	0.0263985	0	0	22.608	168.671	PMAIP1;TIMP3;THBS1;ATF3	.	VEGF signaling pathway	21763	0.104486	0.326518	0	0	1.77281	4.00426	CASP9;PIK3CA;SPHK1;AKT3;MAPKAPK2;PIK3R1;PTGS2;VEGFA
	positive regulation of vascular endothelial growth factor production (GO:0010575)	8/25	0.000584218	0.0263985	0	0	5.3283	39.6705	IL1A;IL6;IL1B;EIF2AK3;RORA;PTGS2;HIF1A;ATF4	.	Mannose type O-glycan biosynthesis	44309	0.112356	0.344228	0	0	2.37759	5.19761	B4GALT1;CRPPA;POMGNT2;FKTN
	mRNA metabolic process (GO:0016071)	18/95	0.000591658	0.0263985	0	0	2.65457	19.7303	ZNF473;SF3A1;ZFP36L2;EREG;ZC3H12D;ERN1;ZFP36;SFPQ;PCF11;PCBP2;SRSF2;DXO;PRMT9;SRSF11;HSPA1B;SNRPB;HNRNPA0;HSPA1A	.	Viral myocarditis	22129	0.112448	0.344228	0	0	1.73862	3.79935	CASP9;CCND1;ABL1;ABL2;CYCS;CD55;HLA-DQA1;ICAM1
	regulation of protein serine/threonine kinase activity (GO:0071900)	20/111	0.00059539	0.0263985	0	0	2.49694	18.543	UVRAG;CCNK;CDKN1A;CCNJ;CDKN1B;DDX3X;CCNT1;CCNH;GADD45A;SYAP1;CDC6;CDC25C;SIRT1;CCNB2;CCND1;SERTAD1;CCNE1;ABL1;CDK12;MNAT1	.	Endocytosis	26/252	0.126071	0.382034	0	0	1.30223	2.6968	TFRC;CXCR4;CBLB;SNX32;WASL;RAB11FIP1;PARD6A;CHMP1B;PSD3;PIP5K1B;LDLR;RAB11FIP4;CYTH1;PSD;HSPA8;ARFGEF2;SMURF2;SMURF1;VPS37C;HSPA2;VPS37B;DNAJC6;RUFY2;MDM2;HSPA1B;HSPA1A
	positive regulation of ubiquitin-protein transferase activity (GO:0051443)	9/31	0.000597793	0.0263985	0	0	4.63359	34.3917	CDC20;ARRDC4;UBE2C;UBE2S;DCUN1D3;ARRDC3;DCUN1D2;RPS2;TOPORS	.	Th1 and Th2 cell differentiation	33909	0.127454	0.382363	0	0	1.53512	3.16235	NFKBIA;JAG1;MAML1;NFATC3;IL12A;PRKCQ;NFKBIE;DLL1;HLA-DQA1;NFKB1;NFKBIB
	positive regulation of cytokine production (GO:0001819)	45/335	0.000615145	0.0268958	0	0	1.77126	13.0961	PTGER4;SERPINE1;EBI3;RORA;PTGS2;HIF1A;TNF;SCAMP5;PNP;PDE4B;EP300;NLRP3;IL12A;CD34;IL10;CREBBP;XBP1;FZD5;RIPK2;SPHK1;PDE4D;CRTAM;EIF2AK3;OSM;TICAM1;F3;NFKB1;EREG;LACC1;IL1A;SLC7A5;IL6;RGCC;IL23A;IRF4;DDIT3;IL1B;IRF1;POLR1C;CTNNB1;XCL1;PRKCQ;HSPA1B;ATF4;HSPA1A	.	Basal cell carcinoma	23224	0.138223	0.40654	0	0	1.64352	3.25233	TCF7L2;CDKN1A;FZD5;GADD45B;GADD45A;CTNNB1;WNT1;GADD45G
	negative regulation of cellular component organization (GO:0051129)	16/80	0.000632147	0.0271025	0	0	2.83741	20.9015	HSPA8;MTMR2;DDX3X;WASL;HSPA2;TNF;VEGFA;SCAMP5;DNAJB2;DNAJB1;DNAJA4;EP300;SPRY2;NOP53;HSPA1B;HSPA1A	.	Cytosolic DNA-sensing pathway	23224	0.138223	0.40654	0	0	1.64352	3.25233	NFKBIA;IL6;CCL4L2;IL1B;POLR1C;CCL4;NFKB1;NFKBIB
	negative regulation of extrinsic apoptotic signaling pathway (GO:2001237)	16/80	0.000632147	0.0271025	0	0	2.83741	20.9015	TCF7L2;DDX3X;SIAH2;SERPINE1;TNFAIP3;TNFRSF10B;TNFRSF10A;TNF;THBS1;SH3RF1;ICAM1;IL1A;IL1B;HSPA1B;MCL1;HSPA1A	.	Tuberculosis	19/180	0.146982	0.426069	0	0	1.33479	2.55938	HSPA9;IL10;PLK3;CREBBP;NFYA;RIPK2;SPHK1;TNF;NFKB1;CASP9;IL1A;IL6;IL23A;IL1B;AKT3;EP300;CYCS;IL12A;HLA-DQA1
	negative regulation of lipid storage (GO:0010888)	7/20	0.000704614	0.0293421	0	0	6.09438	44.2321	NFKBIA;IL6;NR1H2;ABHD5;TNF;ABCG1;TTC39B	.	Insulin signaling pathway	15/137	0.147704	0.426069	0	0	1.39017	2.65876	PTPN1;CBLB;IRS2;TSC1;BRAF;PIK3R1;SORBS1;ACACA;SOCS3;INPP5A;SOCS1;PIK3CA;PRKAR2A;AKT3;SOCS4
	histone exchange (GO:0043486)	10/38	0.000710262	0.0293421	0	0	4.04637	29.3357	SRCAP;NASP;HJURP;H4-16;RSF1;CENPN;KNL1;SPTY2D1;CENPP;CENPC	.	Necroptosis	17/159	0.150759	0.429903	0	0	1.35381	2.56151	H2AX;HSP90AB1;SPATA2;TNFRSF10B;TNFAIP3;TNFRSF10A;TICAM1;TNF;SPATA2L;CYLD;IL1A;FTH1;CHMP1B;IL1B;NLRP3;SLC25A4;BIRC3
	negative regulation of TOR signaling (GO:0032007)	10/38	0.000710262	0.0293421	0	0	4.04637	29.3357	DEPTOR;SESN3;SESN2;DDIT4;CASTOR1;TSC1;FNIP1;DEPDC5;SIRT1;ARNTL	.	NOD-like receptor signaling pathway	19/181	0.15243	0.429903	0	0	1.32647	2.49516	GABARAPL1;HSP90AB1;RIPK2;TNFAIP3;TICAM1;CXCL3;TNF;CXCL2;NFKB1;NFKBIA;IL6;ATG16L1;TRAF3;IL1B;NAMPT;NLRP3;PKN2;NFKBIB;BIRC3
	positive regulation of macromolecule biosynthetic process (GO:0010557)	22/129	0.000710961	0.0293421	0	0	2.33679	16.9391	XBP1;DDX3X;YTHDF3;EIF4A3;NLRC5;IRS2;SORBS1;EEF2;SIRT1;THBS1;NFKB1;EREG;EPM2AIP1;IL6;HSPH1;RGCC;IL1B;NAMPT;BCL3;KAT7;CPEB3;ZCCHC4	.	Parathyroid hormone synthesis, secretion and action	12/106	0.153332	0.429903	0	0	1.44294	2.70573	NR4A2;GNA13;CDKN1A;JUND;MAFB;PDE4D;PDE4B;BRAF;MEF2D;RUNX2;ATF4;HBEGF
	cellular response to arsenic-containing substance (GO:0071243)	6/15	0.000760345	0.0299793	0	0	7.54241	54.1676	DDX3X;GSTO2;ZC3H12A;PPIF;CPEB2;ATF3	.	Axon guidance	19/182	0.157989	0.438857	0	0	1.31826	2.4325	SEMA6B;EPHA4;RYK;LIMK2;NFATC3;CXCR4;PIK3R1;SSH2;RND1;EFNA1;PARD6A;PIK3CA;CFL2;RASA1;ABL1;LRIG2;SRGAP1;NEO1;MET
	histone H3 deacetylation (GO:0070932)	6/15	0.000760345	0.0299793	0	0	7.54241	54.1676	HDAC4;ELK4;PER2;PER1;SFPQ;SIRT1	.	JAK-STAT signaling pathway	17/162	0.168854	0.464737	0	0	1.32558	2.35784	IL10;CREBBP;CDKN1A;OSM;PIK3R1;EPOR;SOCS3;IL6;SOCS1;CCND1;PIK3CA;IL23A;AKT3;EP300;IL12A;SOCS4;MCL1
	intracellular cholesterol transport (GO:0032367)	6/15	0.000760345	0.0299793	0	0	7.54241	54.1676	STARD4;NPC1;OSBP;RELCH;LDLR;ABCG1	.	Carbohydrate digestion and absorption	17319	0.180745	0.49294	0	0	1.65277	2.82734	PIK3CA;AMY2B;AKT3;ATP1A1;PIK3R1;ATP1B1
	positive regulation of natural killer cell activation (GO:0032816)	6/15	0.000760345	0.0299793	0	0	7.54241	54.1676	AP1G1;AXL;IL23A;ZBTB1;IL12A;TICAM1	.	Synthesis and degradation of ketone bodies	44237	0.19323	0.521928	0	0	2.8216	4.63837	HMGCS1;ACAT2
	regulation of nuclear-transcribed mRNA poly(A) tail shortening (GO:0060211)	6/15	0.000760345	0.0299793	0	0	7.54241	54.1676	BTG2;ZFP36;TENT4A;CPEB3;TENT4B;TOB1	.	Cushing syndrome	16/155	0.194853	0.521928	0	0	1.30108	2.12793	TCF7L2;CDKN1A;CDKN1B;FZD5;BRAF;NR4A1;CDK6;RASD1;CCND1;CCNE1;E2F1;CTNNB1;WNT1;PDE8A;LDLR;ATF4
	positive regulation of catabolic process (GO:0009896)	14/67	0.000859989	0.0336081	0	0	2.99611	21.1483	PRKN;BARD1;NDUFA13;CDKN1B;EGLN2;HACE1;SMURF2;SMURF1;TIPARP;PLK2;TNFAIP3;TNF;IL1B;DTL	.	RIG-I-like receptor signaling pathway	25781	0.208349	0.549	0	0	1.4574	2.286	NFKBIA;CYLD;DDX3X;TRAF3;IL12A;TNF;NFKB1;NFKBIB
	protein modification by small protein conjugation (GO:0032446)	52/409	0.000893666	0.0346178	0	0	1.66385	11.6805	ZNF451;ANKRD9;ENC1;ARIH1;RNF111;TRIM23;ARRDC4;MYLIP;FBXW8;SIRT1;TOPORS;H2BC12;H2BC15;GAN;SDE2;PRKN;KLHL18;DCUN1D3;RNF38;DCUN1D2;HIF1A;RNF139;UBB;UBC;NUP88;MARCHF6;BARD1;H2BC9;RANBP2;EGR2;UBE2H;HACE1;KLHL25;SMURF2;UBE2B;SMURF1;UBE2C;AMFR;KLHL21;KLHL2;NUP153;KLHL24;FBXO32;MIB1;KLHL20;RNF103;TRIM39;UBE2S;RLIM;MDM2;PAF1;NFE2L2	.	Various types of N-glycan biosynthesis	14366	0.20862	0.549	0	0	1.66048	2.60237	FUT8;B4GALT1;ALG9;MGAT4A;ALG13
	mitotic spindle organization (GO:0007052)	25/157	0.000910624	0.0349679	0	0	2.15359	15.0781	DCTN6;AHCTF1;TNKS;MIS12;CENPC;CDC20;STMN1;MAP9;CLASP1;NDEL1;RANBP2;STIL;PLK2;SPICE1;KNL1;DYNLL2;EML4;DYNC1LI2;KIF18A;CENPF;KIF4A;SBDS;CENPN;B9D2;CENPP	.	B cell receptor signaling pathway	29830	0.212318	0.553873	0	0	1.41196	2.18807	NFKBIA;PIK3CA;AKT3;NFATC3;PIK3R1;NFKBIE;NFKB1;RASGRP3;NFKBIB
	positive regulation of smooth muscle cell proliferation (GO:0048661)	11/46	0.000936993	0.0356704	0	0	3.56165	24.8348	IL10;ERN1;IL6;NR4A3;FGF9;MMP2;THBS1;TNF;MEF2D;MMP9;EREG	.	Leukocyte transendothelial migration	12/114	0.217294	0.558607	0	0	1.32919	2.02901	AFDN;PIK3CA;RASSF5;MMP2;CXCR4;CTNNB1;PIK3R1;EZR;MMP9;ARHGAP35;ICAM1;JAM3
	positive regulation of T cell cytokine production (GO:0002726)	7/21	0.000983133	0.0367925	0	0	5.65875	39.1856	DENND1B;IL6;FZD5;IL1B;NLRP3;XCL1;CD55	.	Chemokine signaling pathway	19/192	0.219304	0.558607	0	0	1.24138	1.88354	CCL3L1;CCL20;CCL4L2;CXCR5;CXCR4;BRAF;PIK3R1;FOXO3;CXCL3;CXCL2;NFKB1;CXCL16;NFKBIA;PIK3CA;AKT3;CCL4;CCL3;XCL1;NFKBIB
	positive regulation of vascular associated smooth muscle cell proliferation (GO:1904707)	7/21	0.000983133	0.0367925	0	0	5.65875	39.1856	IL10;ERN1;NR4A3;FGF9;MMP2;MMP9;MEF2D	.	Steroid biosynthesis	44275	0.219719	0.558607	0	0	1.99197	3.01864	SQLE;CYP51A1;DHCR7
	cellular response to growth factor stimulus (GO:0071363)	25/158	0.000999906	0.0371057	0	0	2.13728	14.764	FLT1;SYAP1;ZFP36L2;ZFP36;DSTYK;ACVR1C;HAS1;PDE8A;EMD;APPL2;EGR3;SPHK1;ACVR2B;RUNX2;SMAD7;VEGFA;ERN1;NR4A1;MAPKAPK2;XCL1;CTNNB1;SPRY2;CD44;LGMN;ZPR1	.	Prion disease	26/273	0.229132	0.577645	0	0	1.19014	1.75361	NDUFA13;PIK3R1;LAMC1;TNF;CASP9;TUBB6;TUBA1A;NDUFV2;HSPA8;EIF2AK3;ND4L;HSPA2;TUBB4B;TUBA4A;IL1A;IL6;TUBB2A;PIK3CA;DDIT3;IL1B;PPIF;CYCS;SLC25A4;HSPA1B;ATF4;HSPA1A
	regulation of vascular endothelial growth factor production (GO:0010574)	8/27	0.00103546	0.038105	0	0	4.76691	32.7625	IL1A;IL6;IL1B;EIF2AK3;RORA;PTGS2;HIF1A;ATF4	.	Inositol phosphate metabolism	26877	0.241988	0.602713	0	0	1.38991	1.9721	MTMR2;INPP5A;PIK3CA;IPMK;MTMR8;PIP5K1B;MTMR4;PI4K2A
	negative regulation of oxidative stress-induced neuron death (GO:1903204)	5/11	0.00108391	0.0392342	0	0	9.42375	64.3376	IL10;PRKN;NR4A3;HIF1A;ATF4	.	RNA polymerase	11414	0.243094	0.602713	0	0	1.67239	2.36527	POLR2A;POLR1C;POLR1F;POLR1H
	PERK-mediated unfolded protein response (GO:0036499)	5/11	0.00108391	0.0392342	0	0	9.42375	64.3376	DDIT3;EIF2AK3;ATF4;HERPUD1;NFE2L2	.	Complement and coagulation cascades	31291	0.254533	0.621367	0	0	1.33735	1.82993	THBD;SERPINB2;PLAU;SERPINE1;C5AR1;PLAUR;TFPI;F3;CD55
	apoptotic process (GO:0006915)	33/231	0.00110549	0.0396896	0	0	1.89777	12.919	CYFIP2;PPP1R15A;NCKAP1;CSRNP1;DIABLO;CXCR4;CASP9;BCLAF1;BCL2L11;BNIP1;EP300;NLRP3;PMAIP1;PHLDA2;IFT57;RELT;IER3;PLK3;GADD45A;SIAH1;TNFRSF10B;TNFRSF10A;NFKBIA;IL1A;MELK;PIK3CA;IL1B;DLC1;IRF1;DDIT4;MDM2;OGT;TNFRSF21	.	Graft-versus-host disease	15462	0.254761	0.621367	0	0	1.5256	2.08615	IL1A;IL6;IL1B;TNF;HLA-DQA1
	3'-UTR-mediated mRNA destabilization (GO:0061158)	6/16	0.00113313	0.0403541	0	0	6.7878	46.0401	ZC3H12D;ZFP36;ZC3H12A;RC3H1;CPEB3;ZFP36L2	.	Ras signaling pathway	22/232	0.258324	0.624978	0	0	1.18393	1.6025	FLT1;CSF1;GAB1;RRAS2;PIK3R1;FOXO4;ETS2;NFKB1;VEGFA;RASGRP3;EFNA1;AFDN;FGF9;PIK3CA;RASSF5;RASA1;AKT3;RASA2;REL;ABL1;ABL2;MET
	cellular response to decreased oxygen levels (GO:0036294)	14/69	0.00116572	0.0411825	0	0	2.88684	19.499	EGLN2;RORA;TSC1;PTGS2;SIRT1;HIF1A;VEGFA;RGCC;LMNA;MDM2;PMAIP1;CPEB2;NOP53;NKX3-1	.	Terpenoid backbone biosynthesis	44277	0.264569	0.634965	0	0	1.78209	2.36957	IDI1;HMGCS1;ACAT2
	cellular response to UV (GO:0034644)	15/77	0.00122469	0.0420585	0	0	2.74448	18.402	CDKN1A;CREBBP;MMP2;NSMCE3;ZBTB1;MMP9;SIRT1;CRIP1;CASP9;MFAP4;SDE2;EP300;TIMP1;ATF4;ATR	.	Type I diabetes mellitus	15827	0.270669	0.641151	0	0	1.48537	1.94116	IL1A;IL1B;IL12A;TNF;HLA-DQA1
	protein ubiquitination (GO:0016567)	63/525	0.00122961	0.0420585	0	0	1.55947	10.4501	RNF11;SH3RF1;ANKRD9;RNF19A;ENC1;ARIH1;RNF111;TRIM23;ARRDC4;MYLIP;FBXW8;RC3H1;SIRT1;RC3H2;TOPORS;H2BC12;H2BC15;GAN;PSME4;PELI1;SDE2;DTL;PRKN;KLHL18;TNKS;RNF38;HIF1A;FBXO41;RNF139;HECTD2;UBB;UBC;LONRF1;MARCHF6;BARD1;H2BC9;UBE2H;HACE1;KLHL25;SMURF2;UBE2B;SMURF1;UBE2C;AMFR;SIAH2;SIAH1;KLHL21;KLHL2;KLHL24;FBXO32;MIB1;KLHL20;RNF103;TRIM39;UBE2S;RLIM;MDM2;TRIM36;PAF1;CTNNB1;KBTBD8;DZIP3;NFE2L2	.	AMPK signaling pathway	12/120	0.271421	0.641151	0	0	1.25493	1.63654	PFKFB3;CCND1;PIK3CA;SCD;AKT3;IRS2;TSC1;PIK3R1;FOXO3;EEF2;SIRT1;ACACA
	positive regulation of protein catabolic process (GO:0045732)	16/85	0.00125434	0.0420585	0	0	2.63109	17.5787	PRKN;BARD1;PLK3;NDUFA13;CDKN1B;EGLN2;HACE1;SMURF2;SMURF1;TIPARP;PLK2;TNFAIP3;TNF;IL1B;EZR;DTL	.	Choline metabolism in cancer	36069	0.275269	0.645161	0	0	1.28327	1.65543	DGKE;DGKD;PIK3CA;AKT3;TSC1;PIP5K1B;PIK3R1;GPCPD1;HIF1A;DGKH
	negative regulation of T-helper 17 type immune response (GO:2000317)	4/7	0.00125553	0.0420585	0	0	15.0712	100.678	ZC3H12A;RC3H1;RC3H2;SMAD7	.	SNARE interactions in vesicular transport	12145	0.280025	0.651221	0	0	1.55688	1.98172	BNIP1;VAMP1;STX11;VAMP2
	positive regulation of gliogenesis (GO:0014015)	4/7	0.00125553	0.0420585	0	0	15.0712	100.678	IL6;PRKCH;IL1B;TNF	.	Focal adhesion	19/201	0.282229	0.651299	0	0	1.17941	1.492	FLT1;LAMB3;ITGA1;BRAF;PIK3R1;LAMC1;THBS1;ARHGAP35;VEGFA;THBS3;CCND1;PIK3CA;AKT3;COL6A1;CTNNB1;PIP5K1B;COL9A3;MET;BIRC3
	regulation of natural killer cell chemotaxis (GO:2000501)	4/7	0.00125553	0.0420585	0	0	15.0712	100.678	KLRK1;CCL4;CCL3;XCL1	.	Vasopressin-regulated water reabsorption	16193	0.286782	0.653021	0	0	1.4472	1.8076	DCTN6;DYNC1LI2;DCTN4;DYNLL2;VAMP2
	positive regulation of cysteine-type endopeptidase activity (GO:2001056)	13/62	0.00125718	0.0420585	0	0	3.00801	20.0901	CYFIP2;NDUFA13;DDX3X;RIPK2;TNF;SIRT1;ACVR1C;PERP;NLRP3;PMAIP1;CYCS;NKX3-1;LGMN	.	ECM-receptor interaction	32387	0.287832	0.653021	0	0	1.28636	1.602	SDC4;LAMB3;ITGA1;COL6A1;COL9A3;LAMC1;THBS1;CD44;THBS3
	negative regulation of B cell activation (GO:0050869)	7/22	0.0013414	0.0435103	0	0	5.28122	34.9302	IL10;FOXJ1;RC3H1;TNFAIP3;CTLA4;SAMSN1;TNFRSF21	.	Regulation of lipolysis in adipocytes	20241	0.289506	0.653021	0	0	1.38232	1.7135	PIK3CA;AKT3;IRS2;ABHD5;PIK3R1;PTGS2
	peptidyl-threonine dephosphorylation (GO:0035970)	7/22	0.0013414	0.0435103	0	0	5.28122	34.9302	DUSP4;DUSP5;PPM1A;DUSP2;DUSP10;DUSP8;DUSP16	.	Glycosphingolipid biosynthesis	16558	0.303064	0.674052	0	0	1.41095	1.6844	B4GALT1;ST3GAL1;GLA;B4GALT4;ST6GALNAC6
	positive regulation of DNA-templated transcription, initiation (GO:2000144)	7/22	0.0013414	0.0435103	0	0	5.28122	34.9302	FOSL1;BCLAF1;MED14;PAXIP1;MED13;MED30;SRF	.	Hedgehog signaling pathway	20607	0.30404	0.674052	0	0	1.3546	1.61278	EVC2;CCND1;SMURF2;KIF3A;SMURF1;CSNK1G1
	photoperiodism (GO:0009648)	8/28	0.00134724	0.0435103	0	0	4.52832	29.9308	PER2;RBM4;PER1;BHLHE40;CRY2;CRY1;SIK1;CLOCK	.	Chemical carcinogenesis	22/239	0.30557	0.674052	0	0	1.1453	1.35784	GSTM2;JAG1;HSP90AB1;GSTO2;PIK3R1;CDC6;PTGS2;DLL1;NFKB1;VEGFA;KLF5;CCND1;FGF9;BCL6;PIK3CA;RPS6KA2;AKT3;E2F1;KPNA5;KPNA2;WNT1;ATF4
	DNA-templated transcription, termination (GO:0006353)	14/70	0.00134984	0.0435103	0	0	2.83514	18.7339	ZNF473;CCNH;MTERF2;WDR33;TAF1D;POLR2A;CLP1;PCF11;POLR1C;POLR1F;SMN1;POLR1H;MNAT1;SNRPB	.	Alzheimer disease	33/369	0.312182	0.68361	0	0	1.10983	1.29203	NDUFA13;CSF1;IRS2;PIK3R1;PTGS2;TNF;CASP9;TUBB6;TUBA1A;ATG101;AKT3;NDUFV2;WNT1;XBP1;FZD5;EIF2AK3;BRAF;ND4L;TUBB4B;TUBA4A;NFKB1;ERN1;IL1A;IL6;TUBB2A;PIK3CA;DDIT3;IL1B;PPIF;CTNNB1;CYCS;SLC25A4;ATF4
	regulation of interleukin-2 production (GO:0032663)	11/48	0.00136512	0.0436838	0	0	3.36876	22.2221	IL1A;ZFP36;PNP;IRF4;PDE4D;IL1B;PDE4B;TNFAIP3;XCL1;EZR;CD34	.	Regulation of actin cytoskeleton	20/218	0.322191	0.700415	0	0	1.14087	1.29216	CYFIP2;NCKAP1;LIMK2;ITGA1;RRAS2;CXCR4;BRAF;PIK3R1;WASL;SSH2;ARHGAP35;GNA13;DIAPH3;FGF9;PIK3CA;CFL2;SPATA13;PIP5K1B;EZR;MYH10
	negative regulation of apoptotic signaling pathway (GO:2001234)	15/78	0.0014042	0.0446112	0	0	2.70077	17.7394	PRKN;TCF7L2;NDUFA13;DDX3X;SIAH2;PLAUR;TNF;MMP9;THBS1;SH3RF1;HERPUD1;NR4A2;PPIF;MCL1;HSPA1A	.	DNA replication	13241	0.336753	0.723311	0	0	1.41069	1.53541	POLA1;FEN1;RPA4;MCM6
	nuclear-transcribed mRNA catabolic process (GO:0000956)	26/171	0.00145412	0.045867	0	0	2.03875	13.3199	RPLP1;EIF4A3;RPLP0;RPL36A;TENT4B;RPS17;ZFP36;RPS16;RPS18;ZC3H12A;RPL13;RPS2;PELO;CNOT6L;RPS5;RPL22;RC3H1;RPL13A;SAMD4B;RC3H2;PNRC2;PDE12;DXO;ETF1;DCP1A;RPL28	.	Spliceosome	14/150	0.337545	0.723311	0	0	1.16231	1.26234	HSPA8;SF3A1;EIF4A3;HSPA2;RBMXL1;TRA2A;SRSF2;SRSF3;SRSF6;RBMX;BCAS2;HSPA1B;SNRPB;HSPA1A
	positive regulation of immunoglobulin production (GO:0002639)	9/35	0.00155645	0.0487468	0	0	3.91987	25.3433	IL10;XBP1;IL6;PAXIP1;TFRC;KMT5C;CLCF1;DNAJB9;XCL1	.	Central carbon metabolism in cancer	25750	0.343595	0.725905	0	0	1.25414	1.33979	SLC7A5;PIK3CA;AKT3;SLC2A1;PIK3R1;MET;HIF1A
	negative regulation of metabolic process (GO:0009892)	12/56	0.00156779	0.0487561	0	0	3.09108	19.9625	TLE3;BTN2A2;DDIT3;IL1B;NR1H2;PLCL1;ARRDC3;NPR3;ACVR2B;ATF4;ARNTL;MAP2K6	.	Epithelial cell signaling in Helicobacter pylori infection	25750	0.343595	0.725905	0	0	1.25414	1.33979	NFKBIA;CXCL3;CXCL2;MET;NFKB1;HBEGF;JAM3
	ERAD pathway (GO:0036503)	16/87	0.00161867	0.049249	0	0	2.55669	16.4297	PRKN;USP13;SGTB;RHBDD2;AMFR;EDEM1;YOD1;HERPUD1;DNAJC18;DNAJB2;RNF103;RNF139;TMEM67;DNAJB9;RNF175;MARCHF6	.	Lysosome	12/128	0.34925	0.727298	0	0	1.16787	1.22856	AP3M2;NPC1;ENTPD4;AP1G1;NEU1;IDS;PPT2;AP4B1;LITAF;GLA;LGMN;CLN5
	regulation of transcription from RNA polymerase II promoter in response to stress (GO:0043618)	16/87	0.00161867	0.049249	0	0	2.55669	16.4297	CREBBP;EGLN2;HIF1A;KLF2;VEGFA;DNAJB1;UBB;BAG3;DDIT3;PSME4;UBC;EP300;ATF3;ATF4;HSPA1A;NFE2L2	.	Intestinal immune network for IgA production	17654	0.352579	0.727298	0	0	1.31229	1.36804	IL10;IL6;CXCR4;ICOS;HLA-DQA1
	cellular response to lipopolysaccharide (GO:0071222)	20/120	0.00162208	0.049249	0	0	2.2711	14.5896	IL10;XBP1;SERPINE1;TNFAIP3;TICAM1;CXCL3;TNF;CXCL2;NFKB1;IL1A;ZFP36;IL6;AXL;IL1B;ZC3H12A;PDE4B;CCL3;NLRP3;PAF1;NFKBIB	.	Shigellosis	22/246	0.355242	0.727298	0	0	1.10908	1.14785	GABARAPL1;RIPK2;PIK3R1;WASL;FOXO4;FOXO3;TNF;NFKB1;NFKBIA;UBB;PIK3CA;ATG16L1;IL1B;AKT3;UBC;MDM2;NLRP3;CYCS;PRKCQ;CD44;CYTH1;NFKBIB
	RNA catabolic process (GO:0006401)	11/49	0.00163276	0.049249	0	0	3.27993	21.0489	ZC3H12D;ERN1;SUPV3L1;ISG20;FEN1;ZFP36;DXO;ZFP36L2;HSPA1B;HSPA1A;ZPR1	.	Aldosterone-regulated sodium reabsorption	13606	0.355809	0.727298	0	0	1.36787	1.4135	PIK3CA;ATP1A1;PIK3R1;ATP1B1
	positive regulation of protein tyrosine kinase activity (GO:0061098)	10/42	0.0016394	0.049249	0	0	3.5398	22.7022	EFNA1;EPHA4;PTPN1;GPRC5B;CASS4;NEDD9;AREG;LRP8;EREG;HBEGF	.	Glycosylphosphatidylinositol (GPI)-anchor biosynthesis	44281	0.356376	0.727298	0	0	1.47184	1.5186	PIGN;PIGA;PIGH
	positive regulation of DNA-binding transcription factor activity (GO:0051091)	34/246	0.00166392	0.0496479	0	0	1.82589	11.6831	HDAC4;TFRC;SRF;TNF;LRP8;UBB;UBC;EP300;NLRP3;WNT1;IL10;PRKCH;RIPK2;SPHK1;ARID5B;TRAF1;TICAM1;MID2;NFKB1;VEGFA;NFKBIA;FER;IL6;RGCC;DDIT3;IL1B;JMY;CTNNB1;PRKCQ;RHEBL1;CLOCK;HSPA1B;HSPA1A;NFKBIB	.	Human immunodeficiency virus 1 infection	19/212	0.366125	0.742146	0	0	1.11152	1.11683	LIMK2;NFATC3;CXCR4;PIK3R1;CDC25C;TNF;NFKB1;NFKBIA;CASP9;CCNB2;WEE1;PIK3CA;AP1G1;CFL2;AKT3;CDK1;CYCS;ATR;MAP2K6
	negative regulation of cytokine production (GO:0001818)	27/182	0.00172371	0.0503764	0	0	1.98072	12.6039	ILRUN;PTGER4;NLRC5;TNFAIP3;TNF;DLL1;THBS1;ZFP36;ZC3H12A;PCBP2;IL12A;CD34;APPL2;IL10;BTN2A2;FOXJ1;ATP2B1;CYLD;IL6;RGCC;IL23A;AXL;DDIT3;BCL3;XCL1;EZR;TNFRSF21	.	Allograft rejection	13971	0.374859	0.744192	0	0	1.32757	1.30262	IL10;IL12A;TNF;HLA-DQA1
	negative regulation of hemostasis (GO:1900047)	44328	0.00173397	0.0503764	0	0	8.07706	51.3486	THBD;SERPINE2;SERPINE1;TFPI;CD34	.	Wnt signaling pathway	15/166	0.376394	0.744192	0	0	1.1214	1.09574	TLE3;TCF7L2;CREBBP;TLE1;FZD5;RYK;SIAH1;NFATC3;SENP2;FOSL1;CCND1;BAMBI;EP300;CTNNB1;WNT1
	positive regulation of endoplasmic reticulum unfolded protein response (GO:1900103)	44328	0.00173397	0.0503764	0	0	8.07706	51.3486	ERN1;PTPN1;XBP1;BCL2L11;PIK3R1	.	Growth hormone synthesis, secretion and action	11/119	0.376666	0.744192	0	0	1.14964	1.12251	SOCS3;CREBBP;SOCS1;PIK3CA;AKT3;EP300;IRS2;PIK3R1;JUNB;ATF4;MAP2K6
	regulation of astrocyte differentiation (GO:0048710)	44328	0.00173397	0.0503764	0	0	8.07706	51.3486	EPHA4;IL6;SERPINE2;CLCF1;HES1	.	Parkinson disease	22/249	0.377057	0.744192	0	0	1.09424	1.06728	PRKN;XBP1;NDUFA13;EIF2AK3;ND4L;TUBB4B;TUBA4A;ERN1;CASP9;TUBB6;TUBA1A;TUBB2A;UBB;DDIT3;UBC;PPIF;CYCS;NDUFV2;SLC25A4;SLC18A2;ATF4;NFE2L2
	extrinsic apoptotic signaling pathway (GO:0097191)	14/72	0.0017914	0.0514445	0	0	2.73708	17.3114	MOAP1;DDX3X;BCL2A1;DDX47;DIABLO;G0S2;TNFRSF10B;TNFRSF10A;HIPK1;TNF;CASP9;BAG3;IL12A;MCL1	.	Arginine and proline metabolism	18384	0.385819	0.751596	0	0	1.25383	1.19413	ARG2;AMD1;ODC1;PYCR1;SAT1
	regulation of necroptotic process (GO:0060544)	44400	0.00179403	0.0514445	0	0	4.95087	31.3058	CYLD;PELI1;SPATA2;YBX3;OGT;SLC25A4;BIRC3	.	N-Glycan biosynthesis	18384	0.385819	0.751596	0	0	1.25383	1.19413	FUT8;B4GALT1;ALG9;MGAT4A;ALG13
	protein polyubiquitination (GO:0000209)	41/314	0.00180592	0.0514513	0	0	1.7116	10.8116	PRKN;TNKS;TNFAIP3;FBXO41;UBB;HECTD2;RNF19A;UBC;ARIH1;LONRF1;MARCHF6;BARD1;MYLIP;UBE2H;HACE1;FBXW8;SMURF2;UBE2B;SMURF1;UBE2C;SIAH2;AMFR;SIAH1;RC3H1;TRAF1;FBXO32;RC3H2;TOPORS;KLHL20;KBTBD6;UBE2S;TRAF3;PSME4;PELI1;RLIM;MDM2;CTNNB1;TRIM36;DTL;DZIP3;ANAPC1	.	PPAR signaling pathway	27211	0.398158	0.758347	0	0	1.17901	1.08576	HMGCS1;SCD;UBC;OLR1;PLIN2;SORBS1;SLC27A2
	regulation of fat cell differentiation (GO:0045598)	15/80	0.00182983	0.0517982	0	0	2.61739	16.4988	XBP1;SYAP1;GPS2;RORA;TNF;SIRT1;ZFP36L2;ARNTL;ASXL1;ZFP36;IL6;NOCT;ZC3H12A;E2F1;WNT1	.	Phenylalanine, tyrosine and tryptophan biosynthesis	44202	0.399396	0.758347	0	0	2.25627	2.07081	IL4I1
	intrinsic apoptotic signaling pathway by p53 class mediator (GO:0072332)	13394	0.00192738	0.0542122	0	0	3.77449	23.5966	BCL3;DDIT4;JMY;TP53BP2;EP300;PMAIP1;AEN;HIPK1;SIRT1	.	Phosphonate and phosphinate metabolism	44202	0.399396	0.758347	0	0	2.25627	2.07081	SELENOI
	regulation of RNA metabolic process (GO:0051252)	13/65	0.00197783	0.0550659	0	0	2.834	17.6438	RBM38;USP36;MBNL2;AHNAK;RC3H1;PTBP2;RC3H2;CLK1;HNRNPL;RASA1;PCBP2;ZNF326;RBM12	.	Vitamin B6 metabolism	44202	0.399396	0.758347	0	0	2.25627	2.07081	PHOSPHO2
	cellular response to glucose starvation (GO:0042149)	15980	0.00198267	0.0550659	0	0	3.43235	21.3606	XBP1;SESN3;SIK1B;SESN2;ZC3H12A;EIF2AK3;PMAIP1;SIK1;FOXO3;ATF4	.	Butanoate metabolism	44283	0.40194	0.758378	0	0	1.35395	1.23406	ACSM3;HMGCS1;ACAT2
	regulation of tumor necrosis factor-mediated signaling pathway (GO:0010803)	21520	0.00215256	0.0583501	0	0	2.95636	18.1553	PRKN;CYLD;SPHK1;TNFAIP3;GPS2;SPATA2;TRAF1;HIPK1;TNF;HSPA1B;BIRC3;HSPA1A	.	Selenocompound metabolism	44244	0.408517	0.765969	0	0	1.50428	1.34667	CTH;PAPSS2
	CENP-A containing chromatin organization (GO:0061641)	44438	0.00219184	0.0583501	0	0	4.1162	25.2036	NASP;HJURP;H4-16;RSF1;CENPN;KNL1;CENPP;CENPC	.	Ribosome	14/158	0.411778	0.767288	0	0	1.09726	0.973565	RPS5;RPLP1;RPL22;RPLP0;RPL36A;RPL13A;MRPL10;RPS17;RPS16;RPS18;RPL13;RPS2;FAU;RPL28
	CENP-A containing nucleosome assembly (GO:0034080)	44438	0.00219184	0.0583501	0	0	4.1162	25.2036	NASP;HJURP;H4-16;RSF1;CENPN;KNL1;CENPP;CENPC	.	Amyotrophic lateral sclerosis	31/364	0.424626	0.786345	0	0	1.05082	0.900078	PRKN;DCTN6;NDUFA13;NXT1;DCTN4;TNF;CASP9;NXF1;TUBB6;TUBA1A;ATG101;NUP88;NDUFV2;MAP2K6;RANBP2;GABARAPL1;XBP1;GPX3;EIF2AK3;ND4L;NUP153;TUBB4B;TUBA4A;ERN1;TUBB2A;ALS2;DDIT3;SRSF3;CYCS;MATR3;ATF4
	extrinsic apoptotic signaling pathway via death domain receptors (GO:0008625)	44438	0.00219184	0.0583501	0	0	4.1162	25.2036	MOAP1;DDX3X;DDX47;DIABLO;BAG3;TNFRSF10B;TNFRSF10A;TNF	.	Phospholipase D signaling pathway	13/148	0.430467	0.790656	0	0	1.08667	0.915937	DGKE;DGKD;SPHK1;GAB1;RRAS2;TSC1;PIK3R1;GNA13;PIK3CA;AKT3;PIP5K1B;CYTH1;DGKH
	cellular response to molecule of bacterial origin (GO:0071219)	19/115	0.00232124	0.0583501	0	0	2.24654	13.6267	IL10;XBP1;FZD5;SERPINE1;TNFAIP3;TICAM1;CXCL3;CXCL2;NFKB1;IL1A;ZFP36;IL6;AXL;IL1B;ZC3H12A;PDE4B;NLRP3;PAF1;NFKBIB	.	Pathways of neurodegeneration	40/475	0.4365	0.790656	0	0	1.03794	0.860419	PRKN;DCTN6;NDUFA13;CSF1;DCTN4;PTGS2;TNF;CASP9;TUBB6;TUBA1A;UBB;ATG101;ATXN1L;UBC;NDUFV2;WNT1;IFT57;MAP2K6;GABARAPL1;XBP1;FZD5;GPX3;EIF2AK3;BRAF;ND4L;TUBB4B;TUBA4A;NFKB1;ERN1;IL1A;IL6;TUBB2A;ALS2;DDIT3;IL1B;PPIF;CTNNB1;CYCS;SLC25A4;ATF4
	positive regulation of protein metabolic process (GO:0051247)	19/115	0.00232124	0.0583501	0	0	2.24654	13.6267	BARD1;PRKN;NDUFA13;HACE1;CDKN1B;EGLN2;CSF1;SMURF2;SMURF1;TIPARP;PLK2;NR1H2;TNFAIP3;TNF;KLF2;NFKBIA;IL23A;IL1B;DTL	.	Fatty acid biosynthesis	44245	0.437496	0.790656	0	0	1.41019	1.16578	MCAT;ACACA
	regulation of mRNA splicing, via spliceosome (GO:0048024)	16/90	0.00232885	0.0583501	0	0	2.45264	14.8688	RBM39;DAZAP1;MBNL2;RBM15;WTAP;YTHDC1;JMJD6;HNRNPL;RBM4;RBMXL1;TRA2A;SRSF3;RBM7;SRSF6;RBMX;SF1	.	Other glycan degradation	44245	0.437496	0.790656	0	0	1.41019	1.16578	NEU4;NEU1
	positive regulation of cellular catabolic process (GO:0031331)	22/141	0.00233415	0.0583501	0	0	2.09976	12.7248	PTPN1;PFKFB3;PLK2;ZBTB20;RC3H1;IRS2;ABHD5;ZC3HAV1;TICAM1;FOXO3;TNF;GTPBP1;HIF1A;MID2;SUPV3L1;IL1B;ZC3H12A;PRXL2C;TP53INP1;DXO;PIM2;EZR	.	Rap1 signaling pathway	18/210	0.446426	0.797385	0	0	1.0579	0.853179	FARP2;FLT1;CSF1;BRAF;PIK3R1;THBS1;VEGFA;RASGRP3;EFNA1;AFDN;PARD6A;FGF9;PIK3CA;RASSF5;AKT3;CTNNB1;MET;MAP2K6
	regulation of cytokine-mediated signaling pathway (GO:0001959)	14/74	0.00234663	0.0583501	0	0	2.64555	16.0182	PTPN1;HSP90AB1;SPHK1;TNFAIP3;SPATA2;TRAF1;HIPK1;TNF;SOCS3;CYLD;ELF1;SOCS1;AXL;BIRC3	.	Pentose phosphate pathway	44285	0.446535	0.797385	0	0	1.25352	1.01063	PRPS1;ALDOC;RBKS
	cytoplasmic sequestering of NF-kappaB (GO:0007253)	44294	0.00234925	0.0583501	0	0	11.3028	68.4231	IL10;NFKBIA;G3BP2;NFKBIB	.	Asthma	44286	0.468333	0.828348	0	0	1.20868	0.91688	IL10;TNF;HLA-DQA1
	negative regulation of T-helper 17 cell differentiation (GO:2000320)	44294	0.00234925	0.0583501	0	0	11.3028	68.4231	ZC3H12A;RC3H1;RC3H2;SMAD7	.	Phagosome	13/152	0.469397	0.828348	0	0	1.05517	0.798029	TFRC;TUBB4B;THBS1;TUBA4A;FCAR;THBS3;SEC61A2;TUBB6;DYNC1LI2;TUBA1A;TUBB2A;OLR1;HLA-DQA1
	positive regulation of extracellular matrix disassembly (GO:0090091)	44294	0.00234925	0.0583501	0	0	11.3028	68.4231	IL6;FSCN1;MELTF;CLASP1	.	Oocyte meiosis	11/129	0.482955	0.83945	0	0	1.05164	0.765416	CDC20;CCNB2;CCNE1;RPS6KA2;CDK1;SPDYA;CDC25C;CPEB3;CPEB2;ANAPC1;YWHAG
	positive regulation of T-helper 2 cell cytokine production (GO:2000553)	44294	0.00234925	0.0583501	0	0	11.3028	68.4231	DENND1B;IL6;NLRP3;XCL1	.	Purine metabolism	11/129	0.482955	0.83945	0	0	1.05164	0.765416	PRPS1;PNP;ENTPD4;GUK1;NME7;PDE4D;PDE4B;AMPD2;PDE8A;PAICS;PAPSS2
	regulation of response to wounding (GO:1903034)	44294	0.00234925	0.0583501	0	0	11.3028	68.4231	IL10;TNFRSF12A;PLAU;SRSF6	.	Pyrimidine metabolism	20576	0.484083	0.83945	0	0	1.10596	0.802373	PNP;ENTPD4;NME7;CTPS1;DHODH
	regulation of transcription from RNA polymerase II promoter in response to oxidative stress (GO:0043619)	44294	0.00234925	0.0583501	0	0	11.3028	68.4231	SESN2;CHD6;HIF1A;ATF4	.	cAMP signaling pathway	18/216	0.495571	0.854433	0	0	1.02551	0.719951	CREBBP;PDE4D;RRAS2;BRAF;PIK3R1;ATP1A1;ATP2B1;ATP1B1;NFKB1;HCAR2;NFKBIA;HCAR3;AFDN;HTR6;PIK3CA;AKT3;PDE4B;EP300
	positive regulation of neuron apoptotic process (GO:0043525)	44401	0.00235669	0.0583501	0	0	4.65939	28.1916	DDIT3;CCL3;CTNNB1;FOXO3;TNF;ATF4;MCL1	.	Spinocerebellar ataxia	12/143	0.501007	0.85887	0	0	1.0333	0.714146	ERN1;XBP1;PIK3CA;NFYA;ATG101;AKT3;ATXN1L;PPIF;CYCS;RORA;PIK3R1;SLC25A4
	protein alpha-1,2-demannosylation (GO:0036508)	44401	0.00235669	0.0583501	0	0	4.65939	28.1916	RNF103;RNF139;UBB;AMFR;EDEM1;UBC;MARCHF6	.	Basal transcription factors	16528	0.504651	0.860201	0	0	1.10049	0.75261	CCNH;TAF13;MNAT1;TAF5L
	positive regulation of protein ubiquitination (GO:0031398)	15/82	0.00235788	0.0583501	0	0	2.53898	15.3608	ARRDC4;PAXIP1;RIPK2;NSMCE3;SPHK1;DCUN1D3;ARRDC3;DCUN1D2;SENP2;TOPORS;SMAD7;UBB;CRY1;RPS2;BIRC3	.	Glucagon signaling pathway	9/107	0.510628	0.865472	0	0	1.03588	0.696232	CREBBP;SIK1B;AKT3;SLC2A1;EP300;SIK1;SIRT1;ACACA;ATF4
	mRNA catabolic process (GO:0006402)	16346	0.00238159	0.0583501	0	0	3.33121	20.1205	ZC3H12D;ERN1;SUPV3L1;ZFP36;PDE12;RC3H1;DXO;ZFP36L2;HSPA1B;HSPA1A	.	Ribosome biogenesis in eukaryotes	9/108	0.522098	0.87994	0	0	1.02536	0.666385	RCL1;NXF1;NXT1;SBDS;WDR75;SPATA5;WDR43;GNL3;REXO5
	negative regulation of epidermal growth factor receptor signaling pathway (GO:0042059)	16346	0.00238159	0.0583501	0	0	3.33121	20.1205	ERRFI1;GPRC5A;ITGA1;SPRY2;CBLB;SPRY1;AREG;SOCS4;EREG;HBEGF	.	Fc gamma R-mediated phagocytosis	35643	0.538808	0.89936	0	0	1.01377	0.626912	MARCKSL1;PIK3CA;CFL2;SPHK1;LIMK2;AKT3;PIP5K1B;PIK3R1
	positive regulation of mRNA catabolic process (GO:0061014)	16346	0.00238159	0.0583501	0	0	3.33121	20.1205	BTG2;ZFP36;YTHDF3;ZC3H12A;RC3H1;ZC3HAV1;CPEB3;TOB1;GTPBP1;ZFP36L2	.	Nucleotide excision repair	17258	0.539616	0.89936	0	0	1.04919	0.647241	CCNH;RPA4;ERCC5;MNAT1
	response to lipopolysaccharide (GO:0032496)	24/159	0.00239161	0.0583501	0	0	2.01991	12.1917	IL10;XBP1;SERPINE1;TNFAIP3;TICAM1;CXCL3;CXCL2;NFKB1;IL1A;ZFP36;FER;IL6;AXL;IL1B;NOCT;ZC3H12A;MAPKAPK2;PDE4B;PELI1;NLRP3;PAF1;IL12A;NFKBIB;HNRNPA0	.	Nicotinate and nicotinamide metabolism	12844	0.551226	0.913635	0	0	1.05737	0.629779	PNP;NAMPT;SIRT1
	positive regulation of apoptotic signaling pathway (GO:2001235)	21885	0.00250561	0.0607955	0	0	2.8933	17.3286	CYLD;BCLAF1;BCL2L11;TNFRSF12A;TRIM39;DDIT3;SIAH1;PMAIP1;G0S2;TNF;NKX3-1;GSDME	.	RNA transport	15/186	0.555115	0.914908	0	0	0.989152	0.582195	CYFIP2;RANBP2;NXT1;EIF4A3;DDX20;NUP153;SENP2;PNN;NXF1;EIF5;RPP21;STRAP;NUP88;SMN1;RPP14
	transcription by RNA polymerase II (GO:0006366)	41/320	0.00256602	0.061921	0	0	1.67423	9.98747	ZNF473;CCNK;ELL;CCNT1;CCNH;MAML1;RNMT;C5AR1;ZBTB1;DDX21;RORA;TAF5L;SNAPC1;POLR2A;CLP1;PCF11;NOCT;CREBBP;XBP1;NFYA;TAF13;NR1H2;EAF1;NR1D2;ELL2;MED26;NFKB1;WDR33;MED23;NR4A2;NR4A1;NR4A3;PAF1;NABP1;CDK12;INTS6;TRIP13;MNAT1;RBMX;ATF4;SNRPB	.	Glycerolipid metabolism	22402	0.561496	0.914908	0	0	1.00694	0.581155	DGKE;DGKD;LIPC;GLA;DGKH
	intracellular sterol transport (GO:0032366)	44329	0.00262983	0.0631159	0	0	7.06704	41.9841	STARD4;NPC1;OSBP;RELCH;ABCG1	.	Apelin signaling pathway	11/137	0.565188	0.914908	0	0	0.984436	0.561717	HDAC4;GNA13;GABARAPL1;JAG1;CCND1;SPHK1;SERPINE1;AKT3;RRAS2;MEF2D;KLF2
	mitotic G2/M transition checkpoint (GO:0044818)	16711	0.0028424	0.0678489	0	0	3.23586	18.9722	BABAM2;CDKN1A;TRIM39;DONSON;CDK1;NABP1;CLSPN;CDC6;DTL;NOP53	.	Proximal tubule bicarbonate reclamation	44250	0.569449	0.914908	0	0	1.07414	0.60483	ATP1A1;ATP1B1
	mRNA destabilization (GO:0061157)	14124	0.00287931	0.0683604	0	0	3.51379	20.5564	ZC3H12D;ZFP36;YTHDF3;PDE12;ZC3H12A;RC3H1;CPEB3;ZFP36L2;RC3H2	.	Sulfur metabolism	44206	0.572494	0.914908	0	0	1.25321	0.69898	PAPSS2
	cellular response to chemokine (GO:1990869)	22251	0.00290439	0.068587	0	0	2.83287	16.5483	SLC12A2;LRCH1;CCL3L1;GPR35;CCL20;ZC3H12A;CCL4;STK39;CCL3;XCL1;CXCL3;CXCL2	.	Cocaine addiction	17989	0.573279	0.914908	0	0	1.00245	0.557744	FOSB;SLC18A2;NFKB1;ATF4
	regulation of lipid metabolic process (GO:0019216)	16/92	0.00293328	0.0689009	0	0	2.38784	13.925	NCOA2;IDI1;CREBBP;HMGCS1;NFYA;CYP51A1;GPS2;IRS2;RORA;NR1D2;ACACA;SQLE;SCD;IL1B;RUBCNL;DHCR7	.	Hippo signaling pathway	13/163	0.573342	0.914908	0	0	0.977199	0.543589	TCF7L2;FZD5;SERPINE1;BMP8A;AREG;SMAD7;PARD6A;CCND1;TP53BP2;CTNNB1;WNT1;YWHAG;BIRC3
	positive regulation of cellular biosynthetic process (GO:0031328)	26/180	0.00302147	0.0705968	0	0	1.91865	11.132	DDX3X;HSP90AB1;EIF4A3;IRS2;PTGS2;TNF;HIF1A;THBS1;EPM2AIP1;KAT7;LDLR;STARD4;YTHDF3;NR1H2;SORBS1;EEF2;SIRT1;KLF2;EREG;IL6;ZEB2;RGCC;IL1B;BCL3;CPEB3;ZCCHC4	.	Gap junction	32325	0.582559	0.924697	0	0	0.974487	0.526539	MAP3K2;TUBB6;TUBA1A;TUBB2A;CDK1;TUBB4B;TUBA4A
	positive regulation of release of cytochrome c from mitochondria (GO:0090200)	44402	0.00304599	0.0707952	0	0	4.40029	25.495	HRK;MOAP1;BCL2L11;PLAUR;PPIF;PMAIP1;MMP9	.	Cholesterol metabolism	18354	0.58958	0.926042	0	0	0.980602	0.518096	MYLIP;LIPC;NPC1;LDLR
	endoplasmic reticulum mannose trimming (GO:1904380)	44366	0.00310473	0.0714088	0	0	5.22053	30.1477	RNF103;RNF139;UBB;AMFR;UBC;MARCHF6	.	Cysteine and methionine metabolism	18354	0.58958	0.926042	0	0	0.980602	0.518096	IL4I1;MAT2A;CTH;AMD1
	regulation of neuroinflammatory response (GO:0150077)	44366	0.00310473	0.0714088	0	0	5.22053	30.1477	IL6;SPHK1;IL1B;PTGS2;MMP9;TNF	.	Vitamin digestion and absorption	44251	0.593002	0.926565	0	0	1.02526	0.535755	SLC5A6;SLC19A2
	positive regulation of intracellular signal transduction (GO:1902533)	63/546	0.00313934	0.0718308	0	0	1.48992	8.58752	GPR89A;FLT1;HSP90AB1;DDX3X;TFRC;IRS2;AREG;LITAF;TNF;HTR6;FGF9;EP300;PIM2;NKX3-1;ADGRV1;RIPK2;SPHK1;GAB1;TICAM1;F3;SIRT1;MID2;EREG;PPM1A;GPRC5B;PIK3CA;IL23A;DDIT3;IL1B;PELI1;MET;HBEGF;BIRC3;PRKN;SLC20A1;DDX21;PIK3R1;THBS1;BCLAF1;BCL2L11;CCL4;CCL3;PMAIP1;RICTOR;ZNF622;ICOS;FNIP1;HEXIM1;TCF7L2;RYK;PLK2;SIAH1;OSM;TNFRSF10B;EPOR;VEGFA;IL6;AXL;REL;CASS4;SPRY2;ZCCHC3;GSDME	.	Bacterial invasion of epithelial cells	28277	0.605571	0.941302	0	0	0.952852	0.477935	PIK3CA;GAB1;CTNNB1;WASL;PIK3R1;MET
	regulation of epithelial cell proliferation (GO:0050678)	16/93	0.00328097	0.0746844	0	0	2.3567	13.4794	OSR2;TCF7L2;C5AR1;LAMC1;MCC;MTSS1;EREG;VEGFA;NR4A1;ZFP36;DUSP10;CDK6;NR4A3;FGF9;SRSF6;NKX3-1	.	Signaling pathways regulating pluripotency of stem cells	11/143	0.623201	0.963713	0	0	0.93938	0.44422	ACVR1C;FZD5;PIK3CA;AKT3;ID3;CTNNB1;PIK3R1;WNT1;JARID2;SKIL;ACVR2B
	response to endoplasmic reticulum stress (GO:0034976)	18/110	0.00332033	0.074809	0	0	2.21994	12.6707	PPP1R15A;PRKN;PPP1R15B;EIF2AK3;TNFRSF10B;PIK3R1;SELENOK;THBS1;HERPUD1;SCAMP5;ERN1;BCL2L11;RNF139;DDIT3;DNAJB9;ATF3;MARCHF6;ATF4	.	Sphingolipid signaling pathway	9/119	0.64075	0.985769	0	0	0.922273	0.410519	GNA13;SMPD2;PIK3CA;SGMS1;SPHK1;AKT3;PIK3R1;TNF;NFKB1
	response to tumor necrosis factor (GO:0034612)	18/110	0.00332033	0.074809	0	0	2.21994	12.6707	CCL3L1;CCL20;YTHDC2;SPHK1;YBX3;SIRT1;ZFP36L2;CXCL16;ZFP36;ZC3H12A;CCL4;CCL3;XCL1;TNFRSF21;MAP4K3;GSDME;NFE2L2;NKX3-1	.	Long-term potentiation	24593	0.645938	0.988681	0	0	0.909195	0.397365	CREBBP;RPS6KA2;EP300;BRAF;ATF4
	chromatin remodeling at centromere (GO:0031055)	11902	0.00340432	0.0755452	0	0	3.77277	21.4396	NASP;HJURP;H4-16;RSF1;CENPN;KNL1;CENPP;CENPC	.	Biosynthesis of unsaturated fatty acids	44254	0.657811	0.98993	0	0	0.902077	0.377824	SCD;ACOT1
	DNA damage checkpoint signaling (GO:0000077)	11902	0.00340432	0.0755452	0	0	3.77277	21.4396	H2AX;RPA4;E2F1;DONSON;RAD1;CLSPN;CLOCK;ATR	.	Fatty acid elongation	44254	0.657811	0.98993	0	0	0.902077	0.377824	ACOT1;PPT2
	protein K63-linked deubiquitination (GO:0070536)	11902	0.00340432	0.0755452	0	0	3.77277	21.4396	USP13;BABAM2;CYLD;ZRANB1;SPATA2;TNFAIP3;YOD1;OTUD1	.	Fc epsilon RI signaling pathway	24959	0.658972	0.98993	0	0	0.894714	0.373163	PIK3CA;AKT3;PIK3R1;TNF;MAP2K6
	positive regulation of protein modification by small protein conjugation or removal (GO:1903322)	14/77	0.00343923	0.0756424	0	0	2.51916	14.29	HDAC4;PAXIP1;RIPK2;NSMCE3;SPHK1;DCUN1D3;DCUN1D2;SENP2;GNL3;SMAD7;UBB;ZC3H12A;CRY1;BIRC3	.	Homologous recombination	15036	0.659954	0.98993	0	0	0.890124	0.369923	BARD1;BABAM2;RPA4
	negative regulation of cell differentiation (GO:0045596)	27/191	0.00345543	0.0756424	0	0	1.87109	10.605	SRA1;GPS2;RORA;TNF;DLL1;ZFP36L2;ARNTL;NOCT;E2F1;HES1;WNT1;JAG1;ADGRV1;NR1H2;SIRT1;VASN;SMAD7;EFNA1;NFKBIA;ASXL1;IL6;CDK6;BAMBI;PAF1;SPRY2;SPRY1;ABCG1	.	Staphylococcus aureus infection	34881	0.663731	0.990643	0	0	0.896627	0.367508	IL10;KRT18;C5AR1;KRT23;FCAR;HLA-DQA1;ICAM1
	DNA integrity checkpoint signaling (GO:0031570)	14489	0.00347722	0.0756424	0	0	3.39648	19.2293	H2AX;RPA4;E2F1;DONSON;RAD1;CLSPN;CDC6;CLOCK;ATR	.	Non-homologous end-joining	44209	0.668726	0.992648	0	0	0.939752	0.378138	FEN1
	regulation of exit from mitosis (GO:0007096)	14489	0.00347722	0.0756424	0	0	3.39648	19.2293	CDC20;RGCC;UBB;UBE2C;UBE2S;CDCA5;UBC;MAD2L1BP;ANAPC1	.	Amphetamine addiction	25324	0.671692	0.992648	0	0	0.880686	0.350474	ARC;FOSB;SIRT1;SLC18A2;ATF4
	positive regulation of vasculature development (GO:1904018)	17/102	0.00350019	0.0757688	0	0	2.26873	12.8296	XBP1;BTG1;FLT1;SPHK1;SERPINE1;GAB1;HIPK1;HIF1A;F3;SIRT1;THBS1;VEGFA;IL1A;IL1B;ZC3H12A;NINJ1;CD34	.	Glutathione metabolism	20911	0.692782	0.999995	0	0	0.850763	0.312264	GSTM2;GSTO2;GPX3;ODC1
	positive regulation of NF-kappaB transcription factor activity (GO:0051092)	23/155	0.00362325	0.0780501	0	0	1.97883	11.1218	PRKCH;TFRC;RIPK2;SPHK1;TRAF1;TICAM1;TNF;MID2;NFKB1;NFKBIA;FER;IL6;UBB;IL1B;UBC;EP300;NLRP3;PRKCQ;RHEBL1;CLOCK;HSPA1B;NFKBIB;HSPA1A	.	Aldosterone synthesis and secretion	35977	0.69539	0.999995	0	0	0.866926	0.314939	NR4A2;NR4A1;ATP1A1;ATP2B1;ATP1B1;LDLR;ATF4
	negative regulation of cellular protein metabolic process (GO:0032269)	16/94	0.00366194	0.0785006	0	0	2.32635	13.0503	DDX6;BTG2;DDX3X;SERPINE2;EIF4A3;EIF2AK3;RPL13A;SAMD4B;TSC1;CLN8;TOB1;NFKB1;RBM4;RNF139;ENC1;CPEB3	.	Inflammatory mediator regulation of TRP channels	35977	0.69539	0.999995	0	0	0.866926	0.314939	PTGER4;PRKCH;PIK3CA;IL1B;PRKCQ;PIK3R1;MAP2K6
	cytoplasmic sequestering of transcription factor (GO:0042994)	44330	0.00381871	0.0806862	0	0	6.28147	34.9743	IL10;NFKBIA;G3BP2;NFKBIE;NFKBIB	.	Insulin secretion	31564	0.711316	0.999995	0	0	0.84524	0.287922	RAB3A;SLC2A1;ATP1A1;ATP1B1;VAMP2;ATF4
	negative regulation of coagulation (GO:0050819)	44330	0.00381871	0.0806862	0	0	6.28147	34.9743	THBD;SERPINE2;SERPINE1;TFPI;CD34	.	cGMP-PKG signaling pathway	12/167	0.716129	0.999995	0	0	0.872153	0.291207	GNA13;SRF;AKT3;PPIF;NFATC3;IRS2;ATP1A1;ATP2B1;ATP1B1;SLC25A4;MEF2D;ATF4
	regulation of trophoblast cell migration (GO:1901163)	44330	0.00381871	0.0806862	0	0	6.28147	34.9743	ACVR1C;SMURF2;YTHDF3;TIMP1;VEGFA	.	Mineral absorption	22007	0.730902	0.999995	0	0	0.805055	0.252366	FTH1;ATP1A1;ATP2B1;ATP1B1
	positive regulation of histone methylation (GO:0031062)	44403	0.00387931	0.0812937	0	0	4.16847	23.1438	PAXIP1;AUTS2;CTNNB1;PAF1;JARID2;SIRT1;OGT	.	Galactose metabolism	11355	0.731026	0.999995	0	0	0.777483	0.243591	B4GALT1;GLA
	astral microtubule organization (GO:0030953)	44295	0.00395695	0.0812937	0	0	9.04172	50.0214	LIMK2;TPPP;EZR;CLASP1	.	Relaxin signaling pathway	9/129	0.73286	0.999995	0	0	0.844954	0.262612	NFKBIA;PIK3CA;MMP2;AKT3;PIK3R1;MMP9;NFKB1;ATF4;VEGFA
	negative regulation of lipid localization (GO:1905953)	44295	0.00395695	0.0812937	0	0	9.04172	50.0214	NFKBIA;IL6;NR1H2;TNF	.	Protein digestion and absorption	7/103	0.74368	0.999995	0	0	0.821549	0.243297	KCNK5;COL6A1;COL9A3;SLC3A2;ATP1A1;ATP1B1;SLC38A2
	negative regulation of necroptotic process (GO:0060546)	44295	0.00395695	0.0812937	0	0	9.04172	50.0214	PELI1;SLC25A4;YBX3;BIRC3	.	Natural killer cell mediated cytotoxicity	9/131	0.749219	0.999995	0	0	0.831011	0.239933	KLRK1;PIK3CA;TNFRSF10B;BRAF;TNFRSF10A;PIK3R1;ULBP2;TNF;ICAM1
	response to UV-C (GO:0010225)	44295	0.00395695	0.0812937	0	0	9.04172	50.0214	DCUN1D3;BCL3;ERCC5;MAP3K4	.	Hypertrophic cardiomyopathy	33025	0.751527	0.999995	0	0	0.804815	0.229894	IL6;ITGA1;LMNA;TNF;EMD;TTN
	negative regulation of cold-induced thermogenesis (GO:0120163)	17441	0.00397632	0.0812937	0	0	3.06061	16.9172	TLE3;NR1H2;PLCL1;DDIT3;NPR3;ARRDC3;ACVR2B;ARNTL;MAP2K6;ATF4	.	Huntington disease	22/306	0.760315	0.999995	0	0	0.871877	0.238914	DCTN6;CREBBP;NDUFA13;GPX3;DCTN4;ND4L;TUBB4B;SOD2;TUBA4A;ERN1;CASP9;TUBB6;TUBA1A;TUBB2A;POLR2A;ATG101;PPIF;EP300;CYCS;NDUFV2;IFT57;SLC25A4
	regulation of DNA binding (GO:0051101)	17441	0.00397632	0.0812937	0	0	3.06061	16.9172	ILRUN;PRKN;NFKBIA;BCL3;HJURP;E2F1;PLAUR;RSF1;HES1;MMP9	.	Amino sugar and nucleotide sugar metabolism	17593	0.761045	0.999995	0	0	0.751374	0.205172	PGM3;UAP1;GNE
	positive regulation of alpha-beta T cell activation (GO:0046635)	44367	0.00413335	0.0831129	0	0	4.84737	26.6056	HSPH1;PNP;IL23A;EBI3;IL12A;CD55	.	Valine, leucine and isoleucine degradation	17593	0.761045	0.999995	0	0	0.751374	0.205172	IL4I1;HMGCS1;ACAT2
	negative regulation of blood coagulation (GO:0030195)	14855	0.00416838	0.0831129	0	0	3.28674	18.0121	THBD;SERPINB2;SERPINE2;PLAU;SERPINE1;PLAUR;TFPI;CD34;F3	.	Arrhythmogenic right ventricular cardiomyopathy	28246	0.761901	0.999995	0	0	0.78249	0.212789	TCF7L2;ITGA1;LMNA;CTNNB1;EMD
	negative regulation of I-kappaB kinase/NF-kappaB signaling (GO:0043124)	14855	0.00416838	0.0831129	0	0	3.28674	18.0121	PER1;PPM1A;TLE1;TRIM39;PPM1N;ZC3H12A;TNFAIP3;RORA;SIRT1	.	Fructose and mannose metabolism	12086	0.762364	0.999995	0	0	0.727244	0.197324	PFKFB3;ALDOC
	positive regulation of intrinsic apoptotic signaling pathway (GO:2001244)	14855	0.00416838	0.0831129	0	0	3.28674	18.0121	BCLAF1;SFPQ;BCL2L11;UBB;DDIT3;SIAH1;PMAIP1;NKX3-1;GSDME	.	Nitrogen metabolism	44213	0.764231	0.999995	0	0	0.704661	0.189473	CA1
	mitotic G2 DNA damage checkpoint signaling (GO:0007095)	12267	0.00417823	0.0831129	0	0	3.62167	19.839	BABAM2;CDKN1A;TRIM39;DONSON;CDK1;CLSPN;DTL;NOP53	.	Phenylalanine metabolism	44213	0.764231	0.999995	0	0	0.704661	0.189473	IL4I1
	regulation of interleukin-17 production (GO:0032660)	12267	0.00417823	0.0831129	0	0	3.62167	19.839	SLC7A5;IL6;IL23A;SPHK1;DDIT3;OSM;IL12A;PRKCQ	.	Lysine degradation	23102	0.765358	0.999995	0	0	0.763995	0.204301	KMT5C;NSD2;PRDM2;ACAT2
	positive regulation of transferase activity (GO:0051347)	22/148	0.00427965	0.0847486	0	0	1.98235	10.8115	ARRDC4;EPHA4;FLT1;HSP90AB1;TNKS;RYK;DCUN1D3;ARRDC3;LMTK2;DCUN1D2;TOPORS;EPM2AIP1;DSTYK;POLG2;AXL;CTNNB1;PRKCQ;NAF1;RPS2;ZNF622;MET;MAP3K4	.	Ether lipid metabolism	17958	0.773291	0.999995	0	0	0.734999	0.188968	UGT8;ENPP2;SELENOI
	positive regulation of proteasomal ubiquitin-dependent protein catabolic process (GO:0032436)	14/79	0.00437528	0.0862555	0	0	2.44138	13.2611	PRKN;PLK3;HERPUD1;SMAD7;CDC20;DNAJB2;BAG2;RNF19A;MDM2;ARIH1;NOP53;HSPA1B;HSPA1A;NFE2L2	.	Neutrophil extracellular trap formation	13/189	0.775963	0.999995	0	0	0.831652	0.210949	H2AX;HDAC4;H2BC9;C5AR1;H4-16;PIK3R1;NFKB1;H2BC12;H2BC15;PIK3CA;AKT3;PPIF;SLC25A4
	negative regulation of PERK-mediated unfolded protein response (GO:1903898)	44260	0.00475772	0.0897867	0	0	16.9456	90.6247	PPP1R15A;PPP1R15B;PTPN1	.	Pentose and glucuronate interconversions	12451	0.776811	0.999995	0	0	0.704479	0.177922	CRPPA;DCXR
	negative regulation of plasminogen activation (GO:0010757)	44260	0.00475772	0.0897867	0	0	16.9456	90.6247	SERPINE2;SERPINE1;THBS1	.	Propanoate metabolism	12451	0.776811	0.999995	0	0	0.704479	0.177922	ACACA;ACAT2
	plus-end-directed vesicle transport along microtubule (GO:0072383)	44260	0.00475772	0.0897867	0	0	16.9456	90.6247	FYCO1;KIF3A;KIFAP3	.	GnRH signaling pathway	34121	0.7789	0.999995	0	0	0.776935	0.194135	MAP3K2;MMP2;MAP3K4;ATF4;HBEGF;MAP2K6
	positive regulation of heat generation (GO:0031652)	44260	0.00475772	0.0897867	0	0	16.9456	90.6247	IL1B;PTGS2;TNF	.	Salivary secretion	34121	0.7789	0.999995	0	0	0.776935	0.194135	SLC12A2;AMY2B;ATP1A1;ATP2B1;ATP1B1;VAMP2
	positive regulation of natural killer cell chemotaxis (GO:2000503)	44260	0.00475772	0.0897867	0	0	16.9456	90.6247	CCL4;CCL3;XCL1	.	Systemic lupus erythematosus	9/135	0.779821	0.999995	0	0	0.804453	0.20006	H2AX;IL10;H2BC12;H2BC9;H2BC15;H4-16;TNF;HLA-DQA1;SNRPB
	positive regulation of transcription from RNA polymerase II promoter in response to hypoxia (GO:0061419)	44260	0.00475772	0.0897867	0	0	16.9456	90.6247	HIF1A;NFE2L2;VEGFA	.	Cortisol synthesis and secretion	23833	0.78635	0.999995	0	0	0.738865	0.177589	NR4A1;PDE8A;LDLR;ATF4
	regulation of miRNA metabolic process (GO:2000628)	44260	0.00475772	0.0897867	0	0	16.9456	90.6247	RC3H1;NFKB1;RC3H2	.	Ovarian steroidogenesis	18688	0.796236	0.999995	0	0	0.704297	0.160481	ACOT1;PTGS2;LDLR
	regulation of natural killer cell differentiation (GO:0032823)	44260	0.00475772	0.0897867	0	0	16.9456	90.6247	AXL;ZBTB1;PRDM1	.	Glycosaminoglycan degradation	44215	0.801104	0.999995	0	0	0.626297	0.13889	IDS
	regulation of phosphatidylinositol dephosphorylation (GO:0060304)	44260	0.00475772	0.0897867	0	0	16.9456	90.6247	MTMR2;MTMR9;MTMR4	.	Starch and sucrose metabolism	13181	0.803409	0.999995	0	0	0.662967	0.145117	AMY2B;PGM2L1
	ubiquitin-dependent SMAD protein catabolic process (GO:0030579)	44260	0.00475772	0.0897867	0	0	16.9456	90.6247	SMURF2;SMURF1;RNF111	.	Autoimmune thyroid disease	19419	0.817207	0.999995	0	0	0.676052	0.13647	IL10;CTLA4;HLA-DQA1
	regulation of I-kappaB kinase/NF-kappaB signaling (GO:0043122)	30/224	0.00479794	0.0900691	0	0	1.7579	9.38641	PRKN;GPR89A;TFRC;SLC20A1;PPM1N;TNFAIP3;DDX21;RORA;LITAF;TNF;ZC3H12A;PIM2;TLE1;RIPK2;PLK2;TNFRSF10B;TRAF1;TICAM1;SIRT1;MID2;PER1;PPM1A;GPRC5B;TRAF4;TRIM39;TRAF3;IL1B;REL;PELI1;BIRC3	.	Endocrine and other factor-regulated calcium reabsorption	19419	0.817207	0.999995	0	0	0.676052	0.13647	ATP1A1;ATP2B1;ATP1B1
	entrainment of circadian clock by photoperiod (GO:0043153)	44404	0.00487466	0.0900691	0	0	3.95983	21.081	PER2;RBM4;PER1;BHLHE40;CRY2;CRY1;SIK1	.	One carbon pool by folate	44216	0.817319	0.999995	0	0	0.593301	0.119684	MTHFD1L
	positive regulation of mitotic cell cycle (GO:0045931)	44404	0.00487466	0.0900691	0	0	3.95983	21.081	KLHL18;SPHK1;MDM2;HES1;PKN2;NKX3-1;LGMN	.	Fanconi anemia pathway	19784	0.826986	0.999995	0	0	0.66276	0.125903	RPA4;HES1;ATR
	regulation of epidermal growth factor-activated receptor activity (GO:0007176)	44404	0.00487466	0.0900691	0	0	3.95983	21.081	ERRFI1;GPRC5A;CBLB;AREG;SOCS4;EREG;HBEGF	.	Primary immunodeficiency	13912	0.827151	0.999995	0	0	0.626067	0.118808	CD8B2;ICOS
	response to glucocorticoid (GO:0051384)	44404	0.00487466	0.0900691	0	0	3.95983	21.081	IL10;IL1RN;ZFP36;IL6;BCL2L11;TNF;ZFP36L2	.	Pantothenate and CoA biosynthesis	44217	0.832213	0.999995	0	0	0.563606	0.103515	PPCDC
	positive regulation of epithelial cell proliferation (GO:0050679)	19/123	0.0049955	0.0919172	0	0	2.07282	10.9843	PPP1R16B;OSR2;TCF7L2;XBP1;EGR3;STXBP4;C5AR1;NRARP;LAMC1;HIF1A;AREG;F3;SIRT1;VEGFA;NR4A1;NR4A3;FGF9;AKT3;SRSF6	.	Melanogenesis	6/101	0.840685	0.999995	0	0	0.711198	0.12342	TCF7L2;CREBBP;FZD5;EP300;CTNNB1;WNT1
	lipid homeostasis (GO:0055088)	23712	0.00504359	0.092035	0	0	2.61439	13.8292	TLCD3A;XBP1;DDX3X;PNPLA8;ZBTB20;IRS2;NR1D2;ABHD5;THADA;CLN8;SIRT1;ABCG1	.	Arginine biosynthesis	44218	0.845894	0.999995	0	0	0.536738	0.0898292	ARG2
	regulation of extrinsic apoptotic signaling pathway (GO:2001236)	23712	0.00504359	0.092035	0	0	2.61439	13.8292	TCF7L2;CYLD;DEPTOR;TNFRSF12A;SIAH2;G0S2;TNFRSF10B;TNFRSF10A;TRAF1;TNF;THBS1;SH3RF1	.	Histidine metabolism	44218	0.845894	0.999995	0	0	0.536738	0.0898292	HDC
	positive regulation of pri-miRNA transcription by RNA polymerase II (GO:1902895)	12632	0.00508075	0.0923317	0	0	3.48218	18.3939	IL10;FOSL1;KLF5;SRF;FOXO3;HIF1A;TNF;GNL3	.	Mismatch repair	44219	0.85846	0.999995	0	0	0.512313	0.078187	RPA4
	regulation of mitotic cell cycle (GO:0007346)	25/178	0.00519066	0.0935589	0	0	1.85586	9.76348	BTG3;BTG2;BTG1;CDKN1B;SRA1;CDC20;PIM3;PIM2;NKX3-1;IL10;UBE2C;SPHK1;CDC25C;SIRT1;CYLD;UBE2S;PSME4;CDK1;MDM2;CKS2;SIK1;PKN2;OBSL1;ANAPC1;LGMN	.	Protein export	44219	0.85846	0.999995	0	0	0.512313	0.078187	SEC61A2
	regulation of translation (GO:0006417)	25/178	0.00519066	0.0935589	0	0	1.85586	9.76348	DDX6;BTG2;DDX3X;EIF4A3;NOLC1;FOXO3;THBS1;TOB1;RBM4;RNF139;ENC1;KLHL25;YTHDF3;EIF2AK3;RPL13A;SAMD4B;TSC1;EEF2;PUM3;IL6;EIF5;BCL3;ETF1;CPEB3;ZCCHC4	.	Cell adhesion molecules	9/148	0.860398	0.999995	0	0	0.728697	0.109567	SDC4;CD8B2;CTLA4;ICOS;CD34;NEO1;HLA-DQA1;ICAM1;JAM3
	regulation of cysteine-type endopeptidase activity involved in apoptotic process (GO:0043281)	15/89	0.00528716	0.0948446	0	0	2.29793	12.0468	NDUFA13;DDX3X;SIAH2;TNF;SIRT1;THBS1;SH3RF1;VEGFA;ACVR1C;NLRP3;PMAIP1;CYCS;FNIP1;CD44;NKX3-1	.	Tryptophan metabolism	15373	0.867028	0.999995	0	0	0.563337	0.0803792	IL4I1;ACAT2
	integrated stress response signaling (GO:0140467)	44331	0.0053479	0.0948446	0	0	5.65302	29.5712	DDIT3;EIF2AK3;HERPUD1;ATF4;NFE2L2	.	Thyroid hormone synthesis	27485	0.869663	0.999995	0	0	0.634453	0.0886009	GPX3;ATP1A1;ATP1B1;ATF4
	positive regulation of acute inflammatory response (GO:0002675)	44331	0.0053479	0.0948446	0	0	5.65302	29.5712	IL6;IL1B;OSM;PTGS2;TNF	.	Long-term depression	21976	0.876688	0.999995	0	0	0.592801	0.0780151	GNA13;PPP1R17;BRAF
	regulation of dephosphorylation (GO:0035303)	44331	0.0053479	0.0948446	0	0	5.65302	29.5712	PPP1R16B;MTMR2;PPP1R17;MTMR9;MTMR4	.	Arachidonic acid metabolism	22341	0.883614	0.999995	0	0	0.582549	0.0720818	GPX3;PTGS2;PTGES
	intrinsic apoptotic signaling pathway in response to DNA damage by p53 class mediator (GO:0042771)	44368	0.00539345	0.0952698	0	0	4.52397	23.6267	BCL3;DDIT4;EP300;AEN;HIPK1;SIRT1	.	Folate biosynthesis	44222	0.890339	0.999995	0	0	0.450762	0.0523573	PTS
	positive regulation of cellular amide metabolic process (GO:0034250)	14/81	0.00550767	0.0968998	0	0	2.36825	12.3187	EPHA4;DDX3X;YTHDF3;EIF4A3;EEF2;TNF;THBS1;EFNA1;SMPD2;IL6;BCL3;CPEB3;ZCCHC4;ABCG1	.	Maturity onset diabetes of the young	44222	0.890339	0.999995	0	0	0.450762	0.0523573	HES1
	regulation of peptidyl-serine phosphorylation (GO:0033135)	16/98	0.00556642	0.0973852	0	0	2.21239	11.4845	HSP90AB1;TFRC;RIPK2;PDE4D;PAQR3;OSM;BRAF;TNF;SMAD7;VEGFA;IL6;AKAP9;DDIT4;SPRY2;FNIP1;CD44	.	Dilated cardiomyopathy	35186	0.9	0.999995	0	0	0.61847	0.0651626	ITGA1;LMNA;TNF;EMD;TTN
	protein stabilization (GO:0050821)	25/179	0.00557936	0.0973852	0	0	1.84371	9.56641	PRKN;USP13;USP36;CDKN1A;HSP90AB1;CCNH;STXBP4;MTMR9;PIK3R1;BAG2;BAG3;EP300;PIM2;EPHA4;UBE2B;TSC1;ATP1B1;SMAD7;EFNA1;TRIM39;IFT46;NOP53;HSPA1B;HSPA1A;OTUD3	.	GnRH secretion	23437	0.902352	0.999995	0	0	0.553808	0.0569039	PIK3CA;AKT3;PIK3R1
	ubiquitin-dependent ERAD pathway (GO:0030433)	13/73	0.0056677	0.0983422	0	0	2.45506	12.7	SGTB;RHBDD2;AMFR;EDEM1;YOD1;HERPUD1;DNAJC18;DNAJB2;RNF103;TMEM67;DNAJB9;RNF175;MARCHF6	.	Other types of O-glycan biosynthesis	17199	0.904957	0.999995	0	0	0.500608	0.0499949	B4GALT1;OGT
	protein K48-linked ubiquitination (GO:0070936)	21125	0.00567873	0.0983422	0	0	2.70832	14.0048	PRKN;UBE2H;HACE1;KBTBD6;UBE2B;UBE2C;AMFR;PELI1;TNFAIP3;TOPORS;MARCHF6	.	Pyruvate metabolism	17199	0.904957	0.999995	0	0	0.500608	0.0499949	ACACA;ACAT2
	negative regulation of translation (GO:0017148)	15/90	0.00587882	0.101208	0	0	2.26716	11.6451	DDX6;BTG2;DDX3X;YTHDF3;EIF4A3;EIF2AK3;RPL13A;SAMD4B;TSC1;TOB1;RBM4;RNF139;ENC1;CPEB3;CPEB2	.	Diabetic cardiomyopathy	12/203	0.908079	0.999995	0	0	0.706369	0.0681108	NDUFA13;PIK3CA;MMP2;AKT3;PPIF;SLC2A1;ND4L;PIK3R1;NDUFV2;MMP9;SLC25A4;NFKB1
	positive regulation of angiogenesis (GO:0045766)	18/116	0.00589242	0.101208	0	0	2.08334	10.6961	XBP1;BTG1;FLT1;SPHK1;SERPINE1;GAB1;HIPK1;HIF1A;F3;SIRT1;DLL1;THBS1;VEGFA;IL1A;IL1B;ZC3H12A;NINJ1;CD34	.	Glycerophospholipid metabolism	35916	0.909388	0.999995	0	0	0.605104	0.0574751	DGKE;DGKD;GPCPD1;SELENOI;DGKH
	cellular response to oxidative stress (GO:0034599)	19/125	0.00596093	0.101208	0	0	2.03349	10.4166	GPX3;ERCC6L2;PYCR1;FOXO3;SOD2;HIF1A;MMP9;ARNTL;FER;SESN2;ZC3H12A;ABL1;ADNP2;CYCS;CPEB2;HSPA1B;ATF4;NFE2L2;HSPA1A	.	Glyoxylate and dicarboxylate metabolism	44226	0.921971	0.999995	0	0	0.388503	0.0315624	ACAT2
	positive regulation of peptidyl-tyrosine phosphorylation (GO:0050731)	20/134	0.00597944	0.101208	0	0	1.99067	10.1911	EPHA4;PTPN1;RIPK2;OSM;NEDD9;TNF;LRP8;VEGFA;EFNA1;SOCS3;IL6;GPRC5B;IL23A;CLCF1;ENPP2;ABL1;CASS4;IL12A;HES1;CD44	.	Vibrio cholerae infection	18295	0.922585	0.999995	0	0	0.469243	0.0378095	SEC61A2;SLC12A2
	negative regulation of oxidative stress-induced cell death (GO:1903202)	44405	0.00605047	0.101208	0	0	3.77106	19.2612	PRKN;PYCR1;SOD2;PDE8A;SIRT1;ATF4;NFE2L2	.	Vascular smooth muscle contraction	7/133	0.923752	0.999995	0	0	0.624914	0.0495627	GNA13;PRKCH;CALD1;PRKCQ;BRAF;ADM;MYH10
	nucleotide-binding oligomerization domain containing signaling pathway (GO:0070423)	44405	0.00605047	0.101208	0	0	3.77106	19.2612	CYLD;LACC1;UBB;RIPK2;UBC;TNFAIP3;MAP2K6	.	Pancreatic secretion	5/102	0.925871	0.999995	0	0	0.580024	0.0446735	SLC12A2;AMY2B;ATP1A1;ATP2B1;ATP1B1
	regulation of B cell activation (GO:0050864)	44405	0.00605047	0.101208	0	0	3.77106	19.2612	IL10;IL4I1;IL6;TNFAIP3;FOXJ1;SAMSN1;ZFP36L2	.	Tight junction	9/169	0.939142	0.999995	0	0	0.632326	0.039703	AFDN;TUBA1A;PARD6A;CCND1;EZR;MYH10;YBX3;TUBA4A;JAM3
	regulation of DNA damage response, signal transduction by p53 class mediator (GO:0043516)	44405	0.00605047	0.101208	0	0	3.77106	19.2612	MDM2;SNAI1;PMAIP1;SIRT1;HIC1;CD44;ATR	.	Base excision repair	12055	0.939551	0.999995	0	0	0.352023	0.0219496	FEN1
	regulation of DNA-templated transcription, elongation (GO:0032784)	44405	0.00605047	0.101208	0	0	3.77106	19.2612	CCNK;CCNT1;ELL;EAF1;KAT7;ZNF326;WDR43	.	Bile secretion	32964	0.941918	0.999995	0	0	0.523363	0.0313167	SLC2A1;ATP1A1;ATP1B1;LDLR
	cellular response to hydrogen peroxide (GO:0070301)	12997	0.00612499	0.10133	0	0	3.35303	17.0849	OSER1;NET1;IL6;ABL1;PPIF;TNFAIP3;SIRT1;NFE2L2	.	Alcoholism	10/186	0.943353	0.999995	0	0	0.638547	0.0372369	H2AX;H2BC12;HDAC4;H2BC9;H2BC15;H4-16;FOSB;BRAF;SLC18A2;ATF4
	negative regulation of Ras protein signal transduction (GO:0046580)	12997	0.00612499	0.10133	0	0	3.35303	17.0849	DLC1;STMN1;ABL2;SPRY2;SPRY1;MET;ARHGAP35;ARHGAP24	.	Gastric acid secretion	27820	0.952966	0.999995	0	0	0.462468	0.02228	ATP1A1;ATP1B1;EZR
	negative regulation of circadian rhythm (GO:0042754)	44296	0.00617248	0.10133	0	0	7.53436	38.3322	PER2;SFPQ;CRY2;CRY1	.	Mucin type O-glycan biosynthesis	13150	0.953172	0.999995	0	0	0.321797	0.0154332	ST3GAL1
	peptidyl-lysine acetylation (GO:0018394)	44296	0.00617248	0.10133	0	0	7.53436	38.3322	CREBBP;EP300;KAT7;SIRT1	.	Tyrosine metabolism	13150	0.953172	0.999995	0	0	0.321797	0.0154332	IL4I1
	protein K11-linked deubiquitination (GO:0035871)	44296	0.00617248	0.10133	0	0	7.53436	38.3322	USP37;TNFAIP3;YOD1;OTUD3	.	Alanine, aspartate and glutamate metabolism	13516	0.956993	0.999995	0	0	0.312841	0.0137522	IL4I1
	regulation of macromolecule metabolic process (GO:0060255)	27/200	0.0064734	0.105876	0	0	1.77288	8.9354	ZNF451;MTMR2;EOLA1;MTMR9;PRDM2;PRDM1;MTMR4;TOB2;HIF1A;CRIP1;YBX3;TOB1;ZC3H12A;PCBP2;NFKBIZ;ADNP2;LDLR;TBC1D16;KDM6A;IL10;KDM6B;ATP1B1;HNRNPAB;CDK6;TRIM39;RASA1;NFKBID	.	Cholinergic synapse	5/113	0.958289	0.999995	0	0	0.520634	0.0221822	PIK3CA;AKT3;KCNQ5;PIK3R1;ATF4
	fat cell differentiation (GO:0045444)	21490	0.006504	0.105984	0	0	2.65055	13.3464	NR4A2;PER2;TCF7L2;NR4A1;EGR2;MAFB;NR4A3;EP300;METRNL;SENP2;SIRT1	.	Synaptic vesicle cycle	28550	0.958518	0.999995	0	0	0.450086	0.0190689	RAB3A;SLC18A2;VAMP2
	positive regulation of protein kinase activity (GO:0045860)	22/154	0.00688052	0.11101	0	0	1.89162	9.41849	EPHA4;PTPN1;CDKN1A;DDX3X;HSP90AB1;CSF1;MMD;NAB2;SYAP1;NEDD9;TNF;LRP8;EREG;VEGFA;EFNA1;GPRC5B;ALS2;TRAF4;IL23A;CASS4;SPDYA;CLSPN	.	Glycine, serine and threonine metabolism	14611	0.966686	0.999995	0	0	0.288729	0.00978271	CTH
	positive regulation of T cell differentiation (GO:0045582)	15950	0.00689702	0.11101	0	0	2.99624	14.9113	IL4I1;XBP1;DUSP10;PNP;SOCS1;BCL6;IL23A;ZBTB1;TNFSF9	.	Fat digestion and absorption	15707	0.974195	0.999995	0	0	0.268062	0.00700828	ACAT2
	negative regulation of myeloid cell differentiation (GO:0045638)	44369	0.00691297	0.11101	0	0	4.24099	21.0962	HSPA9;ZFP36;CDK6;MAFB;H4-16;PAF1	.	Fatty acid degradation	15707	0.974195	0.999995	0	0	0.268062	0.00700828	ACAT2
	regulation of lipid storage (GO:0010883)	44369	0.00691297	0.11101	0	0	4.24099	21.0962	NFKBIA;IL6;ZC3H12A;SIRT1;TNF;NFKB1	.	Platelet activation	5/124	0.977214	0.999995	0	0	0.472223	0.0108847	GNA13;PIK3CA;AKT3;PIK3R1;ARHGAP35
	regulation of Rac protein signal transduction (GO:0035020)	44332	0.0072637	0.116219	0	0	5.13883	25.308	KBTBD6;AUTS2;ALS2;OGT;ARHGAP24	.	ABC transporters	16438	0.978235	0.999995	0	0	0.255849	0.00563002	ABCG1
	positive regulation of cytokine-mediated signaling pathway (GO:0001961)	13363	0.00732431	0.116346	0	0	3.2331	15.8957	PRKN;CSF1;AXL;NLRC5;CXCR4;HIF1A;HSPA1B;HSPA1A	.	GABAergic synapse	32568	0.979551	0.999995	0	0	0.392281	0.00810483	GABARAPL1;PLCL1;SLC38A2
	regulation of cell cycle G1/S phase transition (GO:1902806)	13363	0.00732431	0.116346	0	0	3.2331	15.8957	CDKN1A;CDKN1B;TRIM39;STXBP4;E2F1;PAF1;FAM83D;APPL2	.	Proteasome	16803	0.980012	0.999995	0	0	0.25015	0.00505073	PSME4
	cellular response to interleukin-1 (GO:0071347)	22/155	0.00741932	0.11711	0	0	1.87729	9.20563	IL1RN;CCL3L1;RIPK2;CCL20;IL1R2;RC3H1;HIF1A;NFKB1;NFKBIA;IL1A;UBB;IL1B;ZC3H12A;PSME4;UBC;CCL4;PELI1;CCL3;XCL1;MAP3K8;RBMX;NKX3-1	.	Morphine addiction	33298	0.982068	0.999995	0	0	0.383324	0.00693626	PDE4D;PDE4B;PDE8A
	positive regulation of leukocyte migration (GO:0002687)	44406	0.00742542	0.11711	0	0	3.59946	17.6476	IL6;CSF1;XCL1;TNF;ICAM1;JAM3;VEGFA	.	Serotonergic synapse	4/113	0.985032	0.999995	0	0	0.412409	0.00621956	HTR6;BRAF;PTGS2;SLC18A2
	cellular response to chemical stress (GO:0062197)	16/101	0.00746665	0.117341	0	0	2.13396	10.4506	DDX3X;GPX3;PYCR1;FOXO3;SOD2;PIK3CA;SESN2;ZC3H12A;ABL1;ADNP2;CYCS;CPEB2;HSPA1B;ATF4;NFE2L2;HSPA1A	.	Dopaminergic synapse	5/132	0.985556	0.999995	0	0	0.442283	0.00643505	AKT3;CLOCK;SLC18A2;ATF4;ARNTL
	response to insulin (GO:0032868)	14/84	0.00763594	0.119576	0	0	2.26638	11.0483	XBP1;INSIG1;SYAP1;IRS2;TSC1;PIK3R1;SORBS1;SIRT1;EPM2AIP1;FER;CPEB2;OGT;SLC25A33;VAMP2	.	Adrenergic signaling in cardiomyocytes	6/150	0.985713	0.999995	0	0	0.467935	0.00673358	KCNE1;AKT3;ATP1A1;ATP2B1;ATP1B1;ATF4
	positive regulation of cysteine-type endopeptidase activity involved in apoptotic process (GO:0043280)	18/119	0.00768594	0.119933	0	0	2.02113	9.83959	NDUFA13;PRR7;DDX3X;DIABLO;EIF2AK3;TNFRSF10B;TNFRSF10A;TNF;F3;SIRT1;CASP9;ACVR1C;DLC1;NLRP3;PMAIP1;CYCS;IFT57;NKX3-1	.	Metabolism of xenobiotics by cytochrome P450	27791	0.98796	0.999995	0	0	0.303942	0.00368179	GSTM2;GSTO2
	regulation of epithelial to mesenchymal transition (GO:0010717)	13/76	0.00800088	0.124408	0	0	2.33777	11.2872	PHLDB1;VASN;SMAD7;EFNA1;IL6;RGCC;BAMBI;IL1B;SNAI1;CTNNB1;SPRY2;SPRY1;CLASP1	.	Circadian entrainment	35490	0.98796	0.999995	0	0	0.358738	0.00434533	PER2;PER1;RASD1
	positive regulation of cellular protein metabolic process (GO:0032270)	16/102	0.0082046	0.126684	0	0	2.10903	10.1298	CYFIP2;DDX3X;CSF1;YTHDF3;NR1H2;EIF4A3;EEF2;THBS1;NFKBIA;IL6;PERP;BCL3;EZR;CPEB3;ZCCHC4;OGT	.	Calcium signaling pathway	11/240	0.989309	0.999995	0	0	0.538597	0.00578904	HTR6;CYSLTR2;FLT1;FGF9;SPHK1;PPIF;CXCR4;ATP2B1;MET;SLC25A4;VEGFA
	regulation of proteasomal ubiquitin-dependent protein catabolic process (GO:0032434)	16/102	0.0082046	0.126684	0	0	2.10903	10.1298	PRKN;HSP90AB1;SMAD7;HERPUD1;DNAJB2;RYBP;BAG2;TRIM39;RNF19A;MAP1A;MDM2;ARIH1;OGT;NOP53;HSPA1B;HSPA1A	.	Peroxisome	29983	0.992284	0.999995	0	0	0.281054	0.00217716	SOD2;SLC27A2
	RNA methylation (GO:0001510)	22221	0.00843408	0.126893	0	0	2.54209	12.1397	RBM15;NSUN4;WTAP;TRMO;MEPCE;TRMT6;TRMT12;BUD23;THADA;TFB1M;ZCCHC4	.	Drug metabolism	3/108	0.994289	0.999995	0	0	0.320963	0.00183834	GSTM2;GSTO2;NME7
	regulation of cell population proliferation (GO:0042127)	81/764	0.00849759	0.126893	0	0	1.3551	6.46109	BTG3;BTG2;CDKN1A;BTG1;CDKN1B;FLT1;TFRC;CSF1;IRS2;ADARB1;AREG;HMGN5;FGF9;FTH1;RPS6KA2;NAMPT;PROK2;TIMP1;PIM2;IER5;JUNB;NKX3-1;IL10;KLF10;OSR2;CNOT6L;ITGA1;TSC1;SIRT1;GNL3;EREG;IL1A;IL1B;ALDH1A2;IRF1;HBEGF;HDAC4;CCL3L1;NPR3;FOXO4;DLL1;THBS1;TOB1;DNAJB2;RNF139;SERTAD1;TP53INP1;LMNA;HES1;WNT1;FKTN;TCF7L2;XBP1;JAG1;JUND;EGR4;OSM;CDC6;SOD2;VEGFA;FOSL1;SQLE;FER;IL6;CDK6;RGCC;NR4A3;BCL6;BAMBI;CLCF1;DLC1;…	.	Cardiac muscle contraction	31809	0.994691	0.999995	0	0	0.264449	0.00140763	ATP1A1;ATP1B1
	regulation of erythrocyte differentiation (GO:0045646)	13728	0.00869224	0.126893	0	0	3.12144	14.8123	HSPA9;ZFP36;CDK6;MAFB;FOXO3;HIF1A;HSPA1B;HSPA1A	.	Oxytocin signaling pathway	5/154	0.996112	0.999995	0	0	0.376525	0.00146691	CDKN1A;CCND1;NFATC3;EEF2;PTGS2
	negative regulation of extrinsic apoptotic signaling pathway in absence of ligand (GO:2001240)	44370	0.00871965	0.126893	0	0	3.9913	18.9275	IL1A;IL1B;TNF;HSPA1B;HSPA1A;MCL1	.	Aminoacyl-tRNA biosynthesis	24108	0.996361	0.999995	0	0	0.172992	0.000630607	TARS3
	negative regulation of signal transduction in absence of ligand (GO:1901099)	44370	0.00871965	0.126893	0	0	3.9913	18.9275	IL1A;IL1B;TNF;HSPA1B;HSPA1A;MCL1	.	Glycolysis / Gluconeogenesis	24473	0.996658	0.999995	0	0	0.170361	0.000570222	ALDOC
	positive regulation of interleukin-17 production (GO:0032740)	44370	0.00871965	0.126893	0	0	3.9913	18.9275	SLC7A5;IL6;IL23A;SPHK1;OSM;PRKCQ	.	Retinol metabolism	24838	0.996931	0.999995	0	0	0.16781	0.000515745	ALDH1A2
	protein alkylation (GO:0008213)	44370	0.00871965	0.126893	0	0	3.9913	18.9275	CSKMT;PRMT3;VCPKMT;ETF1;EEF1AKMT2;SNRPB	.	Thermogenesis	9/232	0.997029	0.999995	0	0	0.452118	0.00134527	NDUFA13;KDM3A;RPS6KA2;BMP8A;DPF3;ND4L;TSC1;NDUFV2;COX20
	activation of cysteine-type endopeptidase activity involved in apoptotic process by cytochrome c (GO:0008635)	44261	0.00894018	0.126893	0	0	11.2964	53.2875	CASP9;DIABLO;CYCS	.	Renin secretion	25204	0.997182	0.999995	0	0	0.165333	0.000466583	PTGER4
	cholesterol import (GO:0070508)	44261	0.00894018	0.126893	0	0	11.2964	53.2875	STARD4;STARD5;LDLR	.	Retrograde endocannabinoid signaling	4/148	0.998419	0.999995	0	0	0.311573	0.000492987	NDUFA13;ND4L;NDUFV2;PTGS2
	free ubiquitin chain polymerization (GO:0010994)	44261	0.00894018	0.126893	0	0	11.2964	53.2875	PRKN;UBE2C;UBE2S	.	Oxidative phosphorylation	3/133	0.99901	0.999995	0	0	0.258884	0.000256325	NDUFA13;ND4L;NDUFV2
	negative regulation of erythrocyte differentiation (GO:0045647)	44261	0.00894018	0.126893	0	0	11.2964	53.2875	HSPA9;ZFP36;MAFB	.	Glutamatergic synapse	2/114	0.999322	0.999995	0	0	0.200402	0.000135968	HOMER1;SLC38A2
	negative regulation of vitamin metabolic process (GO:0046137)	44261	0.00894018	0.126893	0	0	11.2964	53.2875	PRMT3;SNAI1;NFKB1	.	Taste transduction	31413	0.999337	0.999995	0	0	0.132143	8.7664e-05	KCNK5
	plus-end-directed organelle transport along microtubule (GO:0072386)	44261	0.00894018	0.126893	0	0	11.2964	53.2875	FYCO1;KIF3A;KIFAP3	.	Neuroactive ligand-receptor interaction	9/341	0.99999	0.999995	0	0	0.301857	2.87873e-06	PTGER4;HTR6;P2RY10;CYSLTR2;GPR35;CHRNE;P2RY14;C5AR1;ADM
	positive regulation of endoplasmic reticulum stress-induced intrinsic apoptotic signaling pathway (GO:1902237)	44261	0.00894018	0.126893	0	0	11.2964	53.2875	BCL2L11;DDIT3;PMAIP1	.	Olfactory transduction	1/440	0.999995	0.999995	0	0	0.0250905	1.24909e-07	OR2B11
	positive regulation of fever generation (GO:0031622)	44261	0.00894018	0.126893	0	0	11.2964	53.2875	IL1B;PTGS2;TNF	.
	protein insertion into mitochondrial membrane involved in apoptotic signaling pathway (GO:0001844)	44261	0.00894018	0.126893	0	0	11.2964	53.2875	MOAP1;BCL2L11;PMAIP1	.
	regulation of adiponectin secretion (GO:0070163)	44261	0.00894018	0.126893	0	0	11.2964	53.2875	HCAR2;RAB11FIP1;IL1B	.
	regulation of immature T cell proliferation in thymus (GO:0033084)	44261	0.00894018	0.126893	0	0	11.2964	53.2875	IL1A;IL1B;TMEM131L	.
	regulation of NK T cell activation (GO:0051133)	44261	0.00894018	0.126893	0	0	11.2964	53.2875	HSPH1;IL23A;IL12A	.
	regulation of vitamin D biosynthetic process (GO:0060556)	44261	0.00894018	0.126893	0	0	11.2964	53.2875	SNAI1;TNF;NFKB1	.
	sterol import (GO:0035376)	44261	0.00894018	0.126893	0	0	11.2964	53.2875	STARD4;STARD5;LDLR	.
	G2/M transition of mitotic cell cycle (GO:0000086)	19/130	0.00905337	0.126893	0	0	1.94136	9.13335	PLK3;CDKN1A;CCNH;HAUS6;CDC25C;MASTL;TUBB4B;TUBA4A;CCNB2;WEE1;MELK;TUBA1A;AKAP9;CDK1;MNAT1;PHLDA1;CEP43;YWHAG;CLASP1	.
	midbrain dopaminergic neuron differentiation (GO:1904948)	44297	0.00908024	0.126893	0	0	6.45767	30.3617	NR4A2;RYK;CTNNB1;WNT1	.
	mitochondrial transcription (GO:0006390)	44297	0.00908024	0.126893	0	0	6.45767	30.3617	MTERF2;FOXO3;TFB1M;SLC25A33	.
	negative regulation of programmed necrotic cell death (GO:0062099)	44297	0.00908024	0.126893	0	0	6.45767	30.3617	PELI1;SLC25A4;YBX3;BIRC3	.
	negative regulation of T-helper cell differentiation (GO:0045623)	44297	0.00908024	0.126893	0	0	6.45767	30.3617	ZC3H12A;RC3H1;RC3H2;SMAD7	.
	positive regulation of transforming growth factor beta production (GO:0071636)	44297	0.00908024	0.126893	0	0	6.45767	30.3617	XCL1;PTGS2;CD34;THBS1	.
	regulation of T-helper 2 cell cytokine production (GO:2000551)	44297	0.00908024	0.126893	0	0	6.45767	30.3617	DENND1B;IL6;NLRP3;XCL1	.
	response to corticosteroid (GO:0031960)	44297	0.00908024	0.126893	0	0	6.45767	30.3617	IL10;IL1RN;IL6;TNF	.
	T cell chemotaxis (GO:0010818)	44297	0.00908024	0.126893	0	0	6.45767	30.3617	SLC12A2;GPR183;CCL3;CXCL16	.
	RNA 3'-end processing (GO:0031123)	25538	0.009303	0.12951	0	0	2.3844	11.1528	SUPV3L1;DDX39A;CLP1;PCF11;EIF4A3;SRSF2;SRSF3;TENT4A;SRSF6;TENT4B;SRSF11;WDR33	.
	regulation of pri-miRNA transcription by RNA polymerase II (GO:1902893)	16681	0.00936207	0.12951	0	0	2.82948	13.2167	IL10;FOSL1;KLF5;SRF;NFATC3;FOXO3;HIF1A;TNF;GNL3	.
	negative regulation of cellular amide metabolic process (GO:0034249)	14/86	0.00938482	0.12951	0	0	2.20318	10.2859	DDX6;BTG2;DDX3X;SPHK1;EIF4A3;EIF2AK3;RPL13A;SAMD4B;TSC1;TOB1;RBM4;RNF139;ENC1;CPEB3	.
	response to interleukin-1 (GO:0070555)	14/86	0.00938482	0.12951	0	0	2.20318	10.2859	HDAC4;CCL3L1;CCL20;YTHDC2;RC3H1;HIF1A;NFKB1;IL1B;ZC3H12A;CCL4;CCL3;XCL1;RBMX;NKX3-1	.
	negative regulation of ATPase activity (GO:0032780)	44333	0.00961053	0.131802	0	0	4.71033	21.879	PPIF;VCPKMT;TSC1;THADA;SIRT1	.
	negative regulation of insulin secretion (GO:0046676)	44333	0.00961053	0.131802	0	0	4.71033	21.879	PRKN;KLF7;MIDN;BMP8A;PIM3	.
	ciliary basal body-plasma membrane docking (GO:0097711)	15/95	0.00968483	0.132409	0	0	2.12488	9.8535	C2CD3;HAUS6;TUBB4B;TUBA4A;AHI1;TUBA1A;TCTN2;TMEM67;AKAP9;CDK1;B9D2;CEP97;CEP43;YWHAG;CLASP1	.
	gene expression (GO:0010467)	42/356	0.00975867	0.13281	0	0	1.52191	7.04582	HBS1L;NXT1;NUFIP1;YTHDC1;RPLP1;EIF4A3;RPLP0;DDX20;RPL36A;ADARB1;MRPL10;RBM4;NXF1;RPS17;RPS16;POLR2A;CLP1;RPS18;E2F1;RPL13;NUP88;RPS2;SRSF11;RANBP2;RBM39;RPS5;RPL22;RPL13A;NUP153;MLF1;TOPORS;WDR33;HNRNPL;NR4A2;MCM3AP;DDX39A;BCL3;SRSF2;SRSF3;SRSF6;RPL28;NFKBIB	.
	cell cycle G2/M phase transition (GO:0044839)	19/131	0.00980435	0.13281	0	0	1.92392	8.89799	PLK3;CDKN1A;CCNH;HAUS6;CDC25C;MASTL;TUBB4B;TUBA4A;CCNB2;WEE1;MELK;TUBA1A;AKAP9;CDK1;MNAT1;PHLDA1;CEP43;YWHAG;CLASP1	.
	cellular response to hypoxia (GO:0071456)	19/131	0.00980435	0.13281	0	0	1.92392	8.89799	PLK3;CREBBP;EGLN2;RORA;PTGS2;HIF1A;SIRT1;VEGFA;RGCC;UBB;PSME4;UBC;LMNA;MDM2;EP300;PMAIP1;CPEB2;NOP53;NKX3-1	.
	mRNA transport (GO:0051028)	16/104	0.00985477	0.133085	0	0	2.06087	9.5208	RANBP2;NXT1;YTHDC1;EIF4A3;NUP153;WDR33;NXF1;ZFP36;ARC;MCM3AP;DDX39A;SRSF2;SRSF3;NUP88;SRSF6;SRSF11	.
	regulation of protein kinase B signaling (GO:0051896)	27/207	0.0101096	0.136109	0	0	1.70328	7.82532	PHLPP2;PHLPP1;HSP90AB1;IRS2;PIK3R1;AREG;TNF;THBS1;FGF9;CCL3;RICTOR;ICOS;TCF7L2;GAB1;OSM;F3;SIRT1;EREG;PIK3CA;AXL;DDIT3;CASS4;SPRY2;MET;NOP53;HBEGF;OTUD3	.
	positive regulation of production of molecular mediator of immune response (GO:0002702)	14093	0.0102424	0.137061	0	0	3.01723	13.8226	IL10;LACC1;SLC7A5;XBP1;IL6;CLCF1;DNAJB9;XCL1	.
	regulation of apoptotic signaling pathway (GO:2001233)	14093	0.0102424	0.137061	0	0	3.01723	13.8226	NR4A2;CYLD;DEPTOR;SGMS1;TRIM39;TRAF1;TNF;NKX3-1	.
	regulation of cell growth (GO:0001558)	28/217	0.0102849	0.137215	0	0	1.68247	7.70078	CDKN1A;NDUFA13;BTG1;CDKN1B;DDX3X;TFRC;DCUN1D3;CDKN2AIP;CXCL16;DNAJB2;SERTAD2;SESN2;ADNP2;IP6K2;TSPYL2;EGLN2;SPHK1;SIRT1;DCBLD2;NET1;SUPV3L1;BCL6;PRKCQ;MELTF;CEP43;SLC25A33;HSPA1B;HSPA1A	.
	regulation of JNK cascade (GO:0046328)	16/105	0.010773	0.141634	0	0	2.0376	9.23178	PRKN;PHLPP1;GADD45B;GADD45A;GPS2;TRAF1;SH3RF1;GADD45G;CYLD;PER1;DUSP10;TRAF4;TRAF3;IL1B;ZNF622;FKTN	.
	regulation of fibroblast proliferation (GO:0048145)	17046	0.0108192	0.141634	0	0	2.75285	12.4606	CDKN1A;CDK6;FTH1;SPHK1;E2F1;CTNNB1;WNT1;EMD;EREG	.
	nucleotide-binding domain, leucine rich repeat containing receptor signaling pathway (GO:0035872)	44371	0.0108406	0.141634	0	0	3.76936	17.0543	CYLD;UBB;RIPK2;UBC;TNFAIP3;MAP2K6	.
	positive regulation of cellular response to transforming growth factor beta stimulus (GO:1903846)	44371	0.0108406	0.141634	0	0	3.76936	17.0543	CREBBP;ZEB2;HSP90AB1;EP300;THBS1;RNF111	.
	positive regulation of lamellipodium assembly (GO:0010592)	44371	0.0108406	0.141634	0	0	3.76936	17.0543	NCKAP1;AUTS2;PIK3CA;FSCN1;PIK3R1;WNT1	.
	positive regulation of transforming growth factor beta receptor signaling pathway (GO:0030511)	44371	0.0108406	0.141634	0	0	3.76936	17.0543	CREBBP;ZEB2;HSP90AB1;EP300;THBS1;RNF111	.
	regulation of keratinocyte proliferation (GO:0010837)	44371	0.0108406	0.141634	0	0	3.76936	17.0543	ZFP36;STXBP4;KLF9;CASK;SRSF6;AREG	.
	negative regulation of NF-kappaB transcription factor activity (GO:0032088)	13/79	0.0110314	0.143701	0	0	2.23114	10.0558	IL10;NLRC5;TNFAIP3;FOXJ1;SIRT1;NFKBIA;CYLD;TRAF3;DDIT3;ZC3H12A;G3BP2;NLRP3;NFKBIB	.
	DNA repair (GO:0006281)	36/298	0.0112126	0.145632	0	0	1.562	7.01448	H2AX;RPAIN;BTG2;FEN1;CDCA5;ZBTB1;TENT4A;BABAM2;UBB;NSD2;UBC;ABL1;KPNA2;BARD1;UVRAG;UBE2B;GADD45A;ERCC6L2;KMT5C;NSMCE3;USP3;H4-16;SIRT1;WDR33;POLA1;PSME4;RPA4;CDK1;NABP1;RAD1;ERCC5;TRIP13;HROB;MNAT1;NOP53;ATR	.
	cellular response to lipid (GO:0071396)	28/219	0.0115693	0.148916	0	0	1.66467	7.42341	NDUFA13;INSIG1;SERPINE1;TNFAIP3;RORA;ATP1A1;CXCL3;TFPI;CXCL2;ZFP36;ZC3H12A;NRIP1;PDE4B;ADNP2;ABL2;NLRP3;NKX3-1;IL10;XBP1;NCOA3;TICAM1;NFKB1;IL1A;IL6;AXL;IL1B;PAF1;NFKBIB	.
	cholesterol homeostasis (GO:0042632)	26268	0.0116341	0.148916	0	0	2.30332	10.2586	GRAMD1B;XBP1;LIPC;ACSM3;NPC1;INSIG1;NR1H2;RORA;SIRT1;LDLR;ABCG1;TTC39B	.
	nucleic acid metabolic process (GO:0090304)	26268	0.0116341	0.148916	0	0	2.30332	10.2586	HNRNPL;FEN1;DDX24;POLR2A;WTAP;PDE12;PCBP2;WDR74;DXO;KPNA2;RBMX;HNRNPA0	.
	positive regulation of cellular protein localization (GO:1903829)	26268	0.0116341	0.148916	0	0	2.30332	10.2586	PRKN;HSP90AB1;PARD6A;TFRC;LIMK2;SESN2;MAP1A;EIF2AK3;CDK1;KAT7;TNF;GNL3	.
	regulation of TOR signaling (GO:0032006)	26268	0.0116341	0.148916	0	0	2.30332	10.2586	DYRK3;HTR6;DEPTOR;PIK3CA;DDIT4;TSC1;RICTOR;DEPDC5;FAM83D;FNIP1;SIRT1;ARNTL	.
	cellular response to peptide hormone stimulus (GO:0071375)	16/106	0.0117574	0.15006	0	0	2.01485	8.95253	XBP1;INSIG1;SYAP1;IRS2;PIK3R1;SORBS1;NFKB1;NR4A2;NR4A1;FER;CYSLTR2;NR4A3;PRKAR2A;CPEB2;SLC25A33;VAMP2	.
	DNA replication-independent nucleosome assembly (GO:0006336)	14458	0.0119882	0.15136	0	0	2.91974	12.9165	NASP;HJURP;H4-16;RSF1;CENPN;KNL1;CENPP;CENPC	.
	negative regulation of DNA-binding transcription factor activity (GO:0043433)	20/143	0.0120829	0.15136	0	0	1.8441	8.14348	HDAC4;TCF7L2;PAXIP1;NLRC5;TNFAIP3;FOXJ1;SIRT1;SMAD7;NFKBIA;CYLD;TRAF3;DDIT3;ZC3H12A;BHLHE40;NLRP3;ID3;XCL1;SIK1;HES1;NFKBIE	.
	cellular response to reactive oxygen species (GO:0034614)	23316	0.0121263	0.15136	0	0	2.39504	10.5678	OSER1;NET1;FER;IL6;ERCC6L2;PPIF;ABL1;TNFAIP3;MMP9;SIRT1;NFE2L2	.
	negative regulation of cell cycle (GO:0045786)	13/80	0.0122181	0.15136	0	0	2.19772	9.68061	IL10;TSPYL2;HEXIM1;BTG3;BTG2;BTG1;CDKN1B;GMNN;NR4A1;CDK6;RPS6KA2;TP53BP2;NKX3-1	.
	negative regulation of cellular response to growth factor stimulus (GO:0090288)	13/80	0.0122181	0.15136	0	0	2.19772	9.68061	PTPN1;SMURF2;SMURF1;CASK;THBS1;ACVR2B;SMAD7;BAMBI;SPRY2;SPRY1;WNT1;NBL1;SKIL	.
	regulation of NIK/NF-kappaB signaling (GO:1901222)	13/80	0.0122181	0.15136	0	0	2.19772	9.68061	DDX3X;SPHK1;TNF;NFKBIA;PPM1A;CYLD;IL23A;IL1B;ZC3H12A;BCL3;EP300;NLRP3;EZR	.
	negative regulation of Rho protein signal transduction (GO:0035024)	44334	0.0124301	0.15136	0	0	4.34776	19.0764	DLC1;STMN1;ABL2;MET;ARHGAP35	.
	negative regulation of signal transduction by p53 class mediator (GO:1901797)	44334	0.0124301	0.15136	0	0	4.34776	19.0764	PRKN;MDM2;SNAI1;SIRT1;CD44	.
	positive regulation of cell cycle phase transition (GO:1901989)	44334	0.0124301	0.15136	0	0	4.34776	19.0764	KLHL18;DYRK3;STXBP4;PAF1;FAM83D	.
	positive regulation of extracellular matrix organization (GO:1903055)	44334	0.0124301	0.15136	0	0	4.34776	19.0764	IL6;RGCC;FSCN1;MELTF;CLASP1	.
	positive regulation of glial cell differentiation (GO:0045687)	44334	0.0124301	0.15136	0	0	4.34776	19.0764	EGR2;SERPINE2;CLCF1;CXCR4;HES1	.
	regulation of transforming growth factor beta production (GO:0071634)	44334	0.0124301	0.15136	0	0	4.34776	19.0764	XCL1;LRRC32;PTGS2;HIF1A;CD34	.
	T cell migration (GO:0072678)	44334	0.0124301	0.15136	0	0	4.34776	19.0764	SLC12A2;CCL20;GPR183;CCL3;CXCL16	.
	negative regulation of cysteine-type endopeptidase activity involved in apoptotic process (GO:0043154)	20363	0.012432	0.15136	0	0	2.51541	11.0363	DDX3X;SIAH2;PLAUR;FNIP1;TNF;MMP9;THBS1;SH3RF1;CD44;VEGFA	.
	regulation of phosphorylation (GO:0042325)	18/125	0.0125857	0.15136	0	0	1.90717	8.34423	BARD1;RANBP2;CDKN1A;CDKN1B;NLRC5;NUP153;HIF1A;SIRT1;THBS1;EREG;FER;SOCS1;SESN2;EP300;NUP88;FNIP1;OGT;NOP53	.
	mitochondrial genome maintenance (GO:0000002)	44298	0.0127534	0.15136	0	0	5.65015	24.6457	AKT3;SLC25A33;SLC25A4;SLC25A36	.
	mRNA transcription (GO:0009299)	44298	0.0127534	0.15136	0	0	5.65015	24.6457	C5AR1;ZBTB1;ATF4;EREG	.
	negative regulation by host of viral process (GO:0044793)	44298	0.0127534	0.15136	0	0	5.65015	24.6457	PRKN;CCNK;ZC3H12A;PTX3	.
	negative regulation of B cell proliferation (GO:0030889)	44298	0.0127534	0.15136	0	0	5.65015	24.6457	IL10;CTLA4;RC3H1;TNFRSF21	.
	positive regulation of neuroinflammatory response (GO:0150078)	44298	0.0127534	0.15136	0	0	5.65015	24.6457	IL6;IL1B;CCL3;TNF	.
	positive regulation of T-helper 17 type immune response (GO:2000318)	44298	0.0127534	0.15136	0	0	5.65015	24.6457	IL23A;NFKBIZ;PRKCQ;NFKBID	.
	protein localization to condensed chromosome (GO:1903083)	44298	0.0127534	0.15136	0	0	5.65015	24.6457	MTBP;MIS12;CDK1;KNL1	.
	regulation of B cell apoptotic process (GO:0002902)	44298	0.0127534	0.15136	0	0	5.65015	24.6457	IL10;BCL6;IRS2;FNIP1	.
	regulation of natural killer cell activation (GO:0032814)	44298	0.0127534	0.15136	0	0	5.65015	24.6457	IL23A;IL12A;PRDM1;TICAM1	.
	regulation of plasminogen activation (GO:0010755)	44298	0.0127534	0.15136	0	0	5.65015	24.6457	SERPINE2;SERPINE1;MELTF;THBS1	.
	positive regulation of defense response (GO:0031349)	15/98	0.0127674	0.15136	0	0	2.04774	8.92993	PTGER4;AKIRIN2;TASL;FEM1A;SERPINE1;OSM;TNF;EREG;NFKBIA;GPRC5B;IL23A;IL1B;NINJ1;NFKBIZ;CCL3	.
	negative regulation of intracellular steroid hormone receptor signaling pathway (GO:0033144)	11871	0.0129317	0.15136	0	0	3.167	13.7704	PER1;CRY2;CRY1;SIRT1;CLOCK;ARNTL;STRN3	.
	positive regulation of lamellipodium organization (GO:1902745)	11871	0.0129317	0.15136	0	0	3.167	13.7704	NCKAP1;AUTS2;PIK3CA;ENPP2;FSCN1;PIK3R1;WNT1	.
	regulation of centrosome duplication (GO:0010824)	11871	0.0129317	0.15136	0	0	3.167	13.7704	STIL;CHMP1B;TMEM67;PLK2;CENATAC;SPICE1;SIRT1	.
	regulation of transcription involved in G1/S transition of mitotic cell cycle (GO:0000083)	11871	0.0129317	0.15136	0	0	3.167	13.7704	CDK17;POLA1;TFDP2;CCNE1;E2F1;CDC6;ZPR1	.
	response to ionizing radiation (GO:0010212)	26634	0.0129561	0.15136	0	0	2.26481	9.8433	H2AX;NET1;BABAM2;CDKN1A;PAXIP1;GADD45A;DCUN1D3;NABP1;AEN;RAD1;SIRT1;CLOCK	.
	sterol homeostasis (GO:0055092)	26634	0.0129561	0.15136	0	0	2.26481	9.8433	GRAMD1B;XBP1;LIPC;ACSM3;NPC1;INSIG1;NR1H2;RORA;SIRT1;LDLR;ABCG1;TTC39B	.
	regulation of epidermal cell differentiation (GO:0045604)	44372	0.0133021	0.154585	0	0	3.57078	15.4251	ERRFI1;KLF7;ZFP36;MAFG;MAFF;DLL1	.
	regulation of heterotypic cell-cell adhesion (GO:0034114)	44372	0.0133021	0.154585	0	0	3.57078	15.4251	IL10;IL1RN;IL1B;MYADM;TNF;CD44	.
	nervous system development (GO:0007399)	50/447	0.013724	0.159069	0	0	1.43365	6.14835	NCKAP1;PPP1R17;NAB1;NAB2;SLC2A1;IRF2BPL;DPYSL4;DPF3;EP300;JARID2;SEMA6B;MYLIP;ADGRV1;POU3F1;HPCAL4;SDCBP2;ZEB2;ALDH1A2;NINJ1;WDPCP;MET;NBL1;OBSL1;HDAC4;PRKN;PRPS1;CXCR4;CLN8;PTS;CLN5;UGT8;ACVR1C;HES1;NDUFV2;FKTN;FARP1;MBD5;MARCKSL1;EGR2;STIL;JAG1;FZD5;RYK;CYP51A1;SIAH1;VEGFA;AHI1;RNF103;AXL;APBA1	.
	intraciliary transport involved in cilium assembly (GO:0035735)	14824	0.0139432	0.160346	0	0	2.82835	12.0849	IFT74;KIF3A;WDR19;KIF3C;IFT57;KIFAP3;IFT46;DYNLL2	.
	negative regulation of ERBB signaling pathway (GO:1901185)	14824	0.0139432	0.160346	0	0	2.82835	12.0849	ERRFI1;ITGA1;SPRY2;SPRY1;AREG;EREG;HBEGF;LGMN	.
	regulation of nitric oxide biosynthetic process (GO:0045428)	14824	0.0139432	0.160346	0	0	2.82835	12.0849	HSP90AB1;IL1B;ZC3H12A;PTGS2;TNF;CD34;GLA;KLF2	.
	chemokine-mediated signaling pathway (GO:0070098)	20729	0.0140611	0.16112	0	0	2.46059	10.4928	RBM15;CCL3L1;GPR35;CCL20;CCL4;STK39;CCL3;XCL1;CXCL3;CXCL2	.
	regulation of protein metabolic process (GO:0051246)	17777	0.0142344	0.16112	0	0	2.6114	11.1039	HSP90AB1;TRAF3;ODC1;CENATAC;PLAUR;MDM2;FAM83D;LDLR;KLF2	.
	regulation of angiogenesis (GO:0045765)	26/203	0.0142598	0.16112	0	0	1.66723	7.08623	BTG1;FLT1;SERPINE1;TNFAIP3;FOXO4;HIF1A;THBS1;ZC3H12A;PROK2;CD34;PPP1R16B;XBP1;CEMIP2;SPHK1;GAB1;HIPK1;F3;SIRT1;VEGFA;IL1A;IL6;RGCC;IL1B;NINJ1;CTNNB1;SPRY2	.
	response to molecule of bacterial origin (GO:0002237)	26999	0.0143899	0.16112	0	0	2.22756	9.4476	IL10;FER;IL6;FZD5;IL1B;NOCT;MAPKAPK2;PELI1;TNFAIP3;IL12A;CXCL2;HNRNPA0	.
	mRNA transcription by RNA polymerase II (GO:0042789)	44262	0.0147037	0.16112	0	0	8.47186	35.7484	C5AR1;ZBTB1;ATF4	.
	negative regulation by host of viral genome replication (GO:0044828)	44262	0.0147037	0.16112	0	0	8.47186	35.7484	PRKN;CCNK;ZC3H12A	.
	negative regulation of membrane protein ectodomain proteolysis (GO:0051045)	44262	0.0147037	0.16112	0	0	8.47186	35.7484	IL10;TIMP3;TIMP1	.
	negative regulation of p38MAPK cascade (GO:1903753)	44262	0.0147037	0.16112	0	0	8.47186	35.7484	CYLD;DUSP10;EZR	.
	nuclear-transcribed mRNA catabolic process, deadenylation-independent decay (GO:0031086)	44262	0.0147037	0.16112	0	0	8.47186	35.7484	ZFP36;DCP1A;PNRC2	.
	positive regulation of fibroblast apoptotic process (GO:2000271)	44262	0.0147037	0.16112	0	0	8.47186	35.7484	BCL2L11;BTG1;STK17B	.
	positive regulation of NK T cell activation (GO:0051135)	44262	0.0147037	0.16112	0	0	8.47186	35.7484	HSPH1;IL23A;IL12A	.
	positive regulation of T-helper 17 cell differentiation (GO:2000321)	44262	0.0147037	0.16112	0	0	8.47186	35.7484	IL23A;NFKBIZ;NFKBID	.
	protein localization to ciliary membrane (GO:1903441)	44262	0.0147037	0.16112	0	0	8.47186	35.7484	ARL13B;WDR19;BBIP1	.
	pyrimidine-containing compound biosynthetic process (GO:0072528)	44262	0.0147037	0.16112	0	0	8.47186	35.7484	PRPS1;CTPS1;DHODH	.
	regulation of calcidiol 1-monooxygenase activity (GO:0060558)	44262	0.0147037	0.16112	0	0	8.47186	35.7484	IL1B;TNF;NFKB1	.
	regulation of glial cell differentiation (GO:0045685)	44262	0.0147037	0.16112	0	0	8.47186	35.7484	EPHA4;CDK1;TNFRSF21	.
	regulation of oxidative stress-induced neuron intrinsic apoptotic signaling pathway (GO:1903376)	44262	0.0147037	0.16112	0	0	8.47186	35.7484	PRKN;HIF1A;MCL1	.
	regulation of prostaglandin biosynthetic process (GO:0031392)	44262	0.0147037	0.16112	0	0	8.47186	35.7484	IL1B;PTGS2;SIRT1	.
	regulation of smooth muscle cell differentiation (GO:0051150)	44262	0.0147037	0.16112	0	0	8.47186	35.7484	SRF;FOXO4;EREG	.
	chemical homeostasis (GO:0048878)	24047	0.0151971	0.166115	0	0	2.30608	9.65476	SLC4A7;TLCD3A;DDX3X;PNPLA8;ZBTB20;IRS2;NR1D2;ABHD5;THADA;CLN8;TENT4B	.
	negative regulation of JNK cascade (GO:0046329)	12236	0.0152884	0.1667	0	0	3.04503	12.7302	PRKN;DNAJA1;CYLD;PER1;DUSP10;GPS2;FKTN	.
	negative regulation of oxidative stress-induced intrinsic apoptotic signaling pathway (GO:1902176)	44335	0.0157605	0.171425	0	0	4.03699	16.7545	PRKN;SOD2;HIF1A;SIRT1;NFE2L2	.
	proteasomal protein catabolic process (GO:0010498)	26/205	0.0160159	0.172459	0	0	1.64842	6.81484	PRKN;ARNTL;ANKRD9;RNF139;PCBP2;ENC1;PMAIP1;FEM1C;MARCHF6;HACE1;SMURF2;UBE2B;SMURF1;SIAH2;SIAH1;SIRT1;TOPORS;KLHL20;KBTBD6;DDIT3;PSME4;PELI1;MDM2;CTNNB1;CLOCK;NFE2L2	.
	regulation of cell development (GO:0060284)	15189	0.0161204	0.172459	0	0	2.74249	11.3201	PER2;IL1B;BHLHE40;CTNNB1;HES1;DLL1;CLOCK;ARNTL	.
	regulation of release of cytochrome c from mitochondria (GO:0090199)	15189	0.0161204	0.172459	0	0	2.74249	11.3201	HRK;PRKN;MOAP1;BCL2L11;PLAUR;PPIF;PMAIP1;MMP9	.
	regulation of response to DNA damage stimulus (GO:2001020)	15189	0.0161204	0.172459	0	0	2.74249	11.3201	CASP9;BCLAF1;RADX;ABL1;CRY1;IER3;MCL1;NKX3-1	.
	endothelial cell development (GO:0001885)	44373	0.016129	0.172459	0	0	3.39205	13.9995	PPP1R16B;PDE4D;MYADM;EZR;MET;ICAM1	.
	positive regulation of interleukin-2 production (GO:0032743)	44373	0.016129	0.172459	0	0	3.39205	13.9995	IL1A;PNP;IRF4;PDE4D;IL1B;PDE4B	.
	regulation of regulatory T cell differentiation (GO:0045589)	44373	0.016129	0.172459	0	0	3.39205	13.9995	IL4I1;DUSP10;SOCS1;BCL6;IRF1;CTLA4	.
	regulation of smooth muscle cell proliferation (GO:0048660)	18142	0.016213	0.172939	0	0	2.54597	10.4943	TCF7L2;IL6;NR4A3;TNFAIP3;CTNNB1;IL12A;TNF;THBS1;EREG	.
	regulation of defense response (GO:0031347)	13/83	0.0163743	0.174239	0	0	2.10319	8.64841	SPATA2;NR1D2;PTGS2;LRP8;CYLD;LACC1;BCL6;TRAF3;IRF1;XCL1;APPL2;BIRC3;PTGES	.
	regulation of protein kinase activity (GO:0045859)	16/110	0.0164196	0.1743	0	0	1.92869	7.92554	TSPYL2;UVRAG;CDKN1A;CSF1;MMD;C5AR1;TNF;SIRT1;EREG;TTN;DEPTOR;ALS2;TRAF4;SPDYA;CEP43;YWHAG	.
	negative regulation of endoplasmic reticulum unfolded protein response (GO:1900102)	44299	0.0172527	0.179689	0	0	5.02209	20.3886	PPP1R15A;PPP1R15B;PTPN1;DNAJB9	.
	negative regulation of epidermal growth factor-activated receptor activity (GO:0007175)	44299	0.0172527	0.179689	0	0	5.02209	20.3886	ERRFI1;GPRC5A;CBLB;SOCS4	.
	positive regulation of adaptive immune response based on somatic recombination of immune receptors built from immunoglobulin superfamily domains (GO:0002824)	44299	0.0172527	0.179689	0	0	5.02209	20.3886	IL23A;IL1B;ZBTB1;PRKCQ	.
	positive regulation of CD4-positive, alpha-beta T cell activation (GO:2000516)	44299	0.0172527	0.179689	0	0	5.02209	20.3886	SOCS1;XCL1;PRKCQ;CD55	.
	positive regulation of mRNA metabolic process (GO:1903313)	44299	0.0172527	0.179689	0	0	5.02209	20.3886	ZC3H12A;RC3H1;ZC3HAV1;GTPBP1	.
	positive regulation of nuclear-transcribed mRNA poly(A) tail shortening (GO:0060213)	44299	0.0172527	0.179689	0	0	5.02209	20.3886	BTG2;ZFP36;CPEB3;TOB1	.
	relaxation of cardiac muscle (GO:0055119)	44299	0.0172527	0.179689	0	0	5.02209	20.3886	GSTM2;PIK3CA;ATP1A1;ATP1B1	.
	response to UV-B (GO:0010224)	44299	0.0172527	0.179689	0	0	5.02209	20.3886	MFAP4;CDKN1A;IL12A;CRIP1	.
	positive regulation of developmental process (GO:0051094)	23/177	0.0173332	0.180102	0	0	1.6941	6.86979	PRKN;PHLDB1;XBP1;PAXIP1;HSP90AB1;TFRC;SMURF2;KMT5C;NCOA3;SRF;DDHD1;TNF;SIRT1;LRP8;VEGFA;CDC20;GRIP1;BASP1;LMNA;ENPP2;CPEB3;TAPT1;CLASP1	.
	DNA metabolic process (GO:0006259)	33/277	0.0177165	0.183653	0	0	1.53609	6.19545	RPAIN;BTG2;FEN1;GMNN;ZBTB1;DDX21;ORC6;UBB;UBC;KPNA2;NUDT15;BARD1;UVRAG;TCF7L2;UBE2B;GADD45A;KMT5C;NSMCE3;USP3;CDC6;SUPV3L1;POLA1;PSME4;THAP9;RPA4;CDK1;NABP1;RAD1;ERCC5;MCM6;MNAT1;NOP53;ATR	.
	RNA modification (GO:0009451)	21459	0.0177905	0.183759	0	0	2.35781	9.49982	QTRT2;RBM15;NSUN4;MEPCE;TRMT6;ADARB1;TFB1M;ADAT3;JMJD6;ADAT2	.
	protein destabilization (GO:0031648)	12601	0.0179348	0.183759	0	0	2.93209	11.79	PRKN;CREBBP;RNF139;MDM2;EP300;SENP2;SIRT1	.
	regulation of glucose metabolic process (GO:0010906)	12601	0.0179348	0.183759	0	0	2.93209	11.79	PRKN;RUBCNL;PMAIP1;IRS2;RORA;SIRT1;OGT	.
	regulation of lamellipodium assembly (GO:0010591)	12601	0.0179348	0.183759	0	0	2.93209	11.79	NCKAP1;FER;AUTS2;PIK3CA;FSCN1;PIK3R1;WNT1	.
	secondary alcohol biosynthetic process (GO:1902653)	12601	0.0179348	0.183759	0	0	2.93209	11.79	IDI1;SQLE;HMGCS1;INSIG1;CYP51A1;DHCR7;ACAT2	.
	regulation of cell death (GO:0010941)	15/102	0.0180062	0.184064	0	0	1.95317	7.84595	PRKN;PRR7;CDKN1B;RIPK2;RRAS2;TSC1;UBB;PDE12;ZC3H12A;ADNP2;SRSF6;PDE8A;HSPA1B;NKX3-1;HSPA1A	.
	regulation of primary metabolic process (GO:0080090)	18/130	0.0183159	0.186797	0	0	1.82153	7.28608	IDI1;NCOA2;CREBBP;HMGCS1;NFYA;ODC1;CYP51A1;GPS2;IRS2;NR1D2;ACACA;AZIN1;SQLE;SCD;PSME4;RUBCNL;DHCR7;LDLR	.
	neuron migration (GO:0001764)	18507	0.0183857	0.187077	0	0	2.48374	9.92547	NR4A2;CDKL5;TUBB2A;AUTS2;DDIT4;CEP85L;POMGNT2;SH3RF1;VEGFA	.
	positive regulation of epithelial to mesenchymal transition (GO:0010718)	15554	0.0185326	0.187277	0	0	2.66168	10.6154	TCF7L2;IL6;JAG1;RGCC;BAMBI;IL1B;SNAI1;CTNNB1	.
	regulation of extrinsic apoptotic signaling pathway via death domain receptors (GO:1902041)	15554	0.0185326	0.187277	0	0	2.66168	10.6154	DDX3X;SERPINE1;TNFAIP3;PMAIP1;TNFRSF10B;TNFRSF10A;THBS1;ICAM1	.
	regulation of nervous system development (GO:0051960)	15554	0.0185326	0.187277	0	0	2.66168	10.6154	PER2;IL1B;BHLHE40;CTNNB1;HES1;DLL1;ARNTL;ZPR1	.
	regulation of mitotic cell cycle phase transition (GO:1901990)	24/188	0.0186706	0.18824	0	0	1.66009	6.60849	KLHL18;UBE2C;MAD2L1BP;HAUS6;CDC6;TUBB4B;TUBA4A;ZFP36L2;CDC20;CENPF;RGCC;TUBA1A;UBB;UBE2S;AKAP9;PSME4;UBC;CDK1;E2F1;CEP43;ANAPC1;APPL2;YWHAG;CLASP1	.
	anion transmembrane transport (GO:0098656)	24777	0.0188179	0.188863	0	0	2.22348	8.83376	SLC5A6;SLC25A38;SLC7A5;SLC6A8;SLC25A30;SLC16A7;SLC39A8;SLC3A2;LRRC8B;SLC25A4;SLC7A1	.
	regulation of epidermal growth factor receptor signaling pathway (GO:0042058)	24777	0.0188179	0.188863	0	0	2.22348	8.83376	ERRFI1;FER;DGKD;ITGA1;PLAUR;SPRY2;SPRY1;AREG;MMP9;EREG;HBEGF	.
	cytoplasmic pattern recognition receptor signaling pathway (GO:0002753)	44374	0.0193445	0.192399	0	0	3.23035	12.7449	CYLD;UBB;RIPK2;UBC;TNFAIP3;MAP2K6	.
	mitotic chromosome condensation (GO:0007076)	44374	0.0193445	0.192399	0	0	3.23035	12.7449	CDCA5;H4-16;CDK1;NCAPG;TENT4A;TTN	.
	negative regulation of actin filament bundle assembly (GO:0032232)	44374	0.0193445	0.192399	0	0	3.23035	12.7449	PRKN;DLC1;STMN1;PIK3R1;MET;CLASP1	.
	regulation of blood coagulation (GO:0030193)	44374	0.0193445	0.192399	0	0	3.23035	12.7449	THBD;SERPINE2;SERPINE1;TFPI;THBS1;CD34	.
	antigen processing and presentation of exogenous peptide antigen (GO:0002478)	15/103	0.0195415	0.193126	0	0	1.93087	7.59838	DCTN6;SEC24B;DCTN4;IFI30;DYNLL2;DYNC1LI2;KIF18A;MFSD6;KIF3A;AP1G1;KIF4A;KIF3C;KIFAP3;HLA-DQA1;LGMN	.
	microtubule nucleation (GO:0007020)	44336	0.0196363	0.193126	0	0	3.76765	14.8083	AKAP9;TUBGCP5;TPPP;CLASP1;NDEL1	.
	positive regulation of dendrite morphogenesis (GO:0050775)	44336	0.0196363	0.193126	0	0	3.76765	14.8083	CDKL5;FBXW8;SS18L1;LRP8;OBSL1	.
	regulation of lymphocyte differentiation (GO:0045619)	44336	0.0196363	0.193126	0	0	3.76765	14.8083	IL4I1;CRTAM;ABL1;PRDM1;ZFP36L2	.
	regulation of programmed necrotic cell death (GO:0062098)	44336	0.0196363	0.193126	0	0	3.76765	14.8083	CYLD;PELI1;SPATA2;OGT;BIRC3	.
	mitotic DNA damage checkpoint signaling (GO:0044773)	21824	0.0199069	0.195353	0	0	2.30956	9.04584	BABAM2;CDKN1A;CCND1;TRIM39;SDE2;DONSON;CDK1;CLSPN;DTL;NOP53	.
	nuclear-transcribed mRNA catabolic process, nonsense-mediated decay (GO:0000184)	16/113	0.0207655	0.201835	0	0	1.86873	7.24034	RPS5;RPLP1;EIF4A3;RPL22;RPLP0;RPL36A;RPL13A;PNRC2;RPS17;RPS16;RPS18;RPL13;ETF1;RPS2;DCP1A;RPL28	.
	positive regulation of protein localization to nucleus (GO:1900182)	25143	0.020851	0.201835	0	0	2.18435	8.45421	TFRC;BAG3;LIMK2;SESN2;ZC3H12A;MEPCE;EIF2AK3;CDK1;KAT7;PIK3R1;ZPR1	.
	regulation of myeloid cell differentiation (GO:0045637)	25143	0.020851	0.201835	0	0	2.18435	8.45421	HSPA9;CREBBP;RBM15;CDK6;MAFB;NR4A3;H4-16;EP300;PAF1;PRKCQ;THBS1	.
	regulation of intracellular signal transduction (GO:1902531)	48/437	0.0208854	0.201835	0	0	1.40345	5.42954	PHLPP1;SGMS1;FAM13A;WWC2;PRDM1;TNF;ARHGAP35;ARHGAP12;GNA13;PRKAR2A;TAGAP;TP53INP1;TP53BP2;EP300;PIP5K1B;RICTOR;FAM83D;SRGAP1;IER3;MAP2K6;BARD1;PPP1R16B;PLK3;TAF13;CASTOR1;TRAF1;HIPK1;ARHGAP24;VEGFA;TIAM2;NET1;NFKBIA;CYLD;ARHGEF9;TRAF4;TRAF3;IL1B;DLC1;DDIT4;BCL3;JMY;CDK1;MDM2;RAD1;EZR;NOP53;BIRC3;ATR	.
	cholesterol biosynthetic process (GO:0006695)	12966	0.0208873	0.201835	0	0	2.82722	10.9374	IDI1;SQLE;HMGCS1;INSIG1;CYP51A1;DHCR7;ACAT2	.
	negative regulation of T cell proliferation (GO:0042130)	12966	0.0208873	0.201835	0	0	2.82722	10.9374	IL10;IL4I1;SDC4;BTN2A2;CRTAM;RC3H1;TNFRSF21	.
	peptidyl-tyrosine dephosphorylation (GO:0035335)	12966	0.0208873	0.201835	0	0	2.82722	10.9374	DUSP4;DUSP5;PTPN1;DUSP2;DUSP10;DUSP8;DUSP16	.
	negative regulation of type I interferon production (GO:0032480)	15919	0.0211921	0.204333	0	0	2.58549	9.96482	ILRUN;IL10;CYLD;PCBP2;NLRC5;REL;TNFAIP3;RELB	.
	positive regulation of protein kinase B signaling (GO:0051897)	21/161	0.0214094	0.205593	0	0	1.70065	6.53719	TCF7L2;HSP90AB1;GAB1;OSM;IRS2;PIK3R1;TNF;AREG;F3;THBS1;EREG;FGF9;PIK3CA;AXL;CASS4;CCL3;SPRY2;RICTOR;ICOS;MET;HBEGF	.
	regulation of interferon-gamma production (GO:0032649)	13/86	0.0215246	0.205593	0	0	2.01643	7.74018	FZD5;PDE4D;EBI3;CRTAM;SLC7A5;IL23A;AXL;DDIT3;IL1B;ZC3H12A;PDE4B;XCL1;IL12A	.
	cellular response to UV-B (GO:0071493)	44263	0.0221164	0.205593	0	0	6.77712	25.8306	MFAP4;CDKN1A;CRIP1	.
	DNA damage induced protein phosphorylation (GO:0006975)	44263	0.0221164	0.205593	0	0	6.77712	25.8306	ABL1;CRY1;MAP2K6	.
	natural killer cell differentiation (GO:0001779)	44263	0.0221164	0.205593	0	0	6.77712	25.8306	AXL;KAT7;TOX	.
	negative regulation of amyloid-beta clearance (GO:1900222)	44263	0.0221164	0.205593	0	0	6.77712	25.8306	SRF;CYP51A1;TNF	.
	negative regulation of response to reactive oxygen species (GO:1901032)	44263	0.0221164	0.205593	0	0	6.77712	25.8306	PYCR1;PDE8A;NFE2L2	.
	positive regulation of astrocyte differentiation (GO:0048711)	44263	0.0221164	0.205593	0	0	6.77712	25.8306	SERPINE2;CLCF1;HES1	.
	positive regulation of execution phase of apoptosis (GO:1900119)	44263	0.0221164	0.205593	0	0	6.77712	25.8306	DLC1;ZC3H12A;TP53BP2	.
	positive regulation of muscle contraction (GO:0045933)	44263	0.0221164	0.205593	0	0	6.77712	25.8306	SPHK1;SRF;PROK2	.
	positive regulation of steroid biosynthetic process (GO:0010893)	44263	0.0221164	0.205593	0	0	6.77712	25.8306	STARD4;ADM;TNF	.
	regulation of alpha-beta T cell differentiation (GO:0046637)	44263	0.0221164	0.205593	0	0	6.77712	25.8306	PNP;PRDM1;SH3RF1	.
	regulation of alpha-beta T cell proliferation (GO:0046640)	44263	0.0221164	0.205593	0	0	6.77712	25.8306	IRF1;EBI3;SH3RF1	.
	regulation of CD8-positive, alpha-beta T cell proliferation (GO:2000564)	44263	0.0221164	0.205593	0	0	6.77712	25.8306	IRF1;XCL1;SH3RF1	.
	regulation of intrinsic apoptotic signaling pathway by p53 class mediator (GO:1902253)	44263	0.0221164	0.205593	0	0	6.77712	25.8306	PRKN;UBB;MDM2	.
	stress-induced premature senescence (GO:0090400)	44263	0.0221164	0.205593	0	0	6.77712	25.8306	CDKN1A;SIRT1;ARNTL	.
	positive regulation of kinase activity (GO:0033674)	16/114	0.0223928	0.205593	0	0	1.84956	7.02652	EPHA4;CDKN1A;FLT1;CSF1;MMD;RYK;LMTK2;TNF;EREG;DSTYK;ALS2;TRAF4;AXL;SPDYA;ZNF622;MET	.
	RNA metabolic process (GO:0016070)	18/133	0.0226135	0.205593	0	0	1.77372	6.72099	RBM39;DDX3X;NUFIP1;DDX24;WTAP;WDR74;DDX20;ADARB1;HNRNPL;ISG20;SUPV3L1;RBM4;POLR2A;CLP1;ZC3H12A;PCBP2;RBMX;HNRNPA0	.
	activation of cysteine-type endopeptidase activity (GO:0097202)	44300	0.0226264	0.205593	0	0	4.51963	17.1232	CYFIP2;RIPK2;PERP;LGMN	.
	negative regulation of DNA damage response, signal transduction by p53 class mediator (GO:0043518)	44300	0.0226264	0.205593	0	0	4.51963	17.1232	MDM2;SNAI1;SIRT1;CD44	.
	negative regulation of TORC1 signaling (GO:1904262)	44300	0.0226264	0.205593	0	0	4.51963	17.1232	SESN3;SESN2;CASTOR1;DEPDC5	.
	positive regulation of regulatory T cell differentiation (GO:0045591)	44300	0.0226264	0.205593	0	0	4.51963	17.1232	IL4I1;DUSP10;SOCS1;BCL6	.
	positive regulation of type 2 immune response (GO:0002830)	44300	0.0226264	0.205593	0	0	4.51963	17.1232	DENND1B;IL6;NLRP3;XCL1	.
	protein localization to kinetochore (GO:0034501)	44300	0.0226264	0.205593	0	0	4.51963	17.1232	MTBP;MIS12;CDK1;KNL1	.
	regulation of protein kinase C signaling (GO:0090036)	44300	0.0226264	0.205593	0	0	4.51963	17.1232	ADGRV1;DGKD;MYADM;VEGFA	.
	relaxation of muscle (GO:0090075)	44300	0.0226264	0.205593	0	0	4.51963	17.1232	GSTM2;PIK3CA;ATP1A1;ATP1B1	.
	response to chemokine (GO:1990868)	44300	0.0226264	0.205593	0	0	4.51963	17.1232	SLC12A2;LRCH1;ZC3H12A;STK39	.
	response to UV-A (GO:0070141)	44300	0.0226264	0.205593	0	0	4.51963	17.1232	CCND1;MMP2;TIMP1;MMP9	.
	macromolecule catabolic process (GO:0009057)	44375	0.0229701	0.206171	0	0	3.08335	11.6352	UVRAG;SMURF1;SIAH1;CLN8;CLN5;LGMN	.
	negative regulation of cellular response to insulin stimulus (GO:1900077)	44375	0.0229701	0.206171	0	0	3.08335	11.6352	PTPN1;PTPRE;SOCS1;IL1B;PRKCQ;APPL2	.
	positive regulation of fibroblast proliferation (GO:0048146)	44375	0.0229701	0.206171	0	0	3.08335	11.6352	CDKN1A;CDK6;SPHK1;E2F1;WNT1;EREG	.
	regulation of extrinsic apoptotic signaling pathway in absence of ligand (GO:2001239)	44375	0.0229701	0.206171	0	0	3.08335	11.6352	IL1A;IL1B;TNF;HSPA1B;MCL1;HSPA1A	.
	regulation of protein transport (GO:0051223)	44375	0.0229701	0.206171	0	0	3.08335	11.6352	DNAJA1;HSPA8;PTPN1;STXBP5;TNF;NDEL1	.
	RNA phosphodiester bond hydrolysis (GO:0090501)	44375	0.0229701	0.206171	0	0	3.08335	11.6352	ZC3H12D;ERN1;ZC3H12C;PCF11;PDE12;ZC3H12A	.
	negative regulation of cellular biosynthetic process (GO:0031327)	19238	0.0233519	0.209173	0	0	2.36796	8.8966	ZC3H12A;PRMT3;CRY1;SNAI1;EP300;SIK1;CD34;GLA;NFKB1	.
	cellular macromolecule biosynthetic process (GO:0034645)	36/314	0.0234627	0.20974	0	0	1.4708	5.51893	HBS1L;FEN1;RPLP1;RPLP0;RPL36A;MRPL10;RPS17;RPS16;ORC6;POLR2A;RPS18;E2F1;RPL13;KAT7;RPS2;CLSPN;BARD1;RPS5;RPL22;DONSON;RPL13A;CDC6;EEF2;GTPBP1;MLF1;TOPORS;NR4A2;POLA1;RPA4;BCL3;CDK1;RAD1;MCM6;RPL28;ATR;NFKBIB	.
	negative regulation of peptidyl-serine phosphorylation (GO:0033137)	44337	0.0240872	0.212965	0	0	3.53198	13.1604	GADD45A;PDE4D;PAQR3;DDIT4;SMAD7	.
	positive regulation of phosphatase activity (GO:0010922)	44337	0.0240872	0.212965	0	0	3.53198	13.1604	PPP1R15A;PPP1R15B;HSP90AB1;ITGA1;MTMR9	.
	lymphocyte chemotaxis (GO:0048247)	16285	0.0241108	0.212965	0	0	2.51354	9.36317	SLC12A2;CCL3L1;CCL20;GPR183;CCL4;CCL3;XCL1;CXCL16	.
	regulation of endothelial cell apoptotic process (GO:2000351)	16285	0.0241108	0.212965	0	0	2.51354	9.36317	IL10;RGCC;SERPINE1;TNFAIP3;THBS1;TNF;ICAM1;NFE2L2	.
	cellular response to heat (GO:0034605)	13332	0.0241612	0.212965	0	0	2.72958	10.1623	IL1A;HSP90AB1;BAG3;THBS1;IER5;HSPA1B;HSPA1A	.
	endoderm formation (GO:0001706)	13332	0.0241612	0.212965	0	0	2.72958	10.1623	DUSP4;DUSP5;DUSP2;LAMB3;MMP2;COL6A1;MMP9	.
	positive regulation of T cell mediated immunity (GO:0002711)	13332	0.0241612	0.212965	0	0	2.72958	10.1623	FZD5;IL23A;IL1B;ZBTB1;XCL1;IL12A;CD55	.
	negative regulation of response to stimulus (GO:0048585)	22555	0.0246818	0.217121	0	0	2.21875	8.21313	PTPN1;KLF7;CDK6;NR1H2;AKT3;CASK;PIM3;CD34;SIRT1;APPL2	.
	protein phosphorylation (GO:0006468)	53/496	0.0254026	0.223018	0	0	1.36097	4.9987	DYRK3;FLT1;CCNT1;MAML1;CCNH;TESK2;STK19;SIK1B;RPS6KA2;AKT3;PIM3;PIM2;EPHA4;PRKCH;CDKL5;LMTK2;MASTL;ERN1;MELK;CCNE1;MAK;MAPKAPK2;CRY1;PRKCQ;SIK1;CSNK1G1;TNKS;STK39;ACVR1C;ABL1;ABL2;MAP3K21;RICTOR;CLSPN;MAPK6;MAP4K3;MAP2K6;CDK17;RYK;PLK2;LIMK2;EIF2AK3;BRAF;HIPK1;ACVR2B;SMAD7;FER;CDK6;STK17B;CDK1;PKN2;CDK12;ATR	.
	phosphorylation (GO:0016310)	44/400	0.0255028	0.223453	0	0	1.40478	5.15408	DGKE;DYRK3;DGKD;CCNT1;CERK;MAML1;STK39;TESK2;STK19;ACVR1C;SIK1B;AKT3;ABL1;MAP3K21;PIM3;PIM2;MAPK6;MAP4K3;CDK17;PRKCH;CDKL5;RYK;PLK2;SPHK1;LIMK2;EIF2AK3;LMTK2;BRAF;HIPK1;ACVR2B;ERN1;FER;MELK;CDK6;PIK3CA;CCNE1;MAK;STK17B;MAPKAPK2;CDK1;PKN2;SIK1;CDK12;DGKH	.
	mRNA 3'-end processing (GO:0031124)	29190	0.0256515	0.223868	0	0	2.02741	7.42673	ZNF473;DDX39A;CLP1;PCF11;EIF4A3;SRSF2;SRSF3;PAF1;SRSF6;TENT4B;SRSF11;WDR33	.
	positive regulation of ubiquitin-dependent protein catabolic process (GO:2000060)	29190	0.0256515	0.223868	0	0	2.02741	7.42673	PRKN;DNAJB2;BAG2;RNF139;SMURF1;RNF19A;MDM2;ARIH1;NOP53;HSPA1B;SMAD7;HSPA1A	.
	regulation of programmed cell death (GO:0043067)	24/194	0.0262029	0.228229	0	0	1.60097	5.83054	PRKN;MOAP1;USP36;CREBBP;PHLPP1;USP42;SRA1;TNFRSF10B;TNFRSF10A;SIRT1;TNF;LRP8;BCL2L11;BCL6;PERP;BCL3;TP53INP1;TP53BP2;ABL1;TNFSF9;PMAIP1;IFT57;NOP53;BIRC3	.
	negative regulation of cell growth (GO:0030308)	17/126	0.0268885	0.231286	0	0	1.76687	6.38912	TSPYL2;NDUFA13;CDKN1A;BTG1;CDKN1B;DDX3X;DCUN1D3;SIRT1;CDKN2AIP;DCBLD2;DNAJB2;BCL6;SERTAD2;SESN2;HSPA1B;IP6K2;HSPA1A	.
	negative regulation of growth (GO:0045926)	17/126	0.0268885	0.231286	0	0	1.76687	6.38912	TSPYL2;NDUFA13;CDKN1A;BTG1;CDKN1B;DDX3X;DCUN1D3;SIRT1;CDKN2AIP;DCBLD2;DNAJB2;BCL6;SERTAD2;SESN2;HSPA1B;IP6K2;HSPA1A	.
	aggrephagy (GO:0035973)	44376	0.0270253	0.231286	0	0	2.94913	10.6492	PRKN;DYNC1LI2;ARL13B;UBB;UBC;DYNLL2	.
	beta-catenin-TCF complex assembly (GO:1904837)	44376	0.0270253	0.231286	0	0	2.94913	10.6492	TCF7L2;TLE3;CREBBP;TLE1;EP300;CTNNB1	.
	establishment of endothelial barrier (GO:0061028)	44376	0.0270253	0.231286	0	0	2.94913	10.6492	PPP1R16B;AFDN;PDE4D;MYADM;EZR;ICAM1	.
	intrinsic apoptotic signaling pathway in response to endoplasmic reticulum stress (GO:0070059)	44376	0.0270253	0.231286	0	0	2.94913	10.6492	PPP1R15A;ERN1;DDIT3;TNFRSF10B;SELENOK;ATF4	.
	positive regulation of extrinsic apoptotic signaling pathway (GO:2001238)	44376	0.0270253	0.231286	0	0	2.94913	10.6492	CYLD;TNFRSF12A;PMAIP1;G0S2;THBS1;TNF	.
	protein K11-linked ubiquitination (GO:0070979)	44376	0.0270253	0.231286	0	0	2.94913	10.6492	PRKN;UBE2H;UBE2B;UBE2C;UBE2S;ANAPC1	.
	regulation of response to biotic stimulus (GO:0002831)	44376	0.0270253	0.231286	0	0	2.94913	10.6492	TRAF3;IRF1;LRP8;APPL2;CD55;BIRC3	.
	regulation of insulin receptor signaling pathway (GO:0046626)	16650	0.0272997	0.232308	0	0	2.44547	8.80584	PTPN1;PTPRE;SOCS1;IL1B;PRKCQ;SORBS1;SIRT1;OGT	.
	antigen processing and presentation of exogenous peptide antigen via MHC class II (GO:0019886)	14/98	0.0273286	0.232308	0	0	1.8872	6.79359	DCTN6;SEC24B;DCTN4;IFI30;DYNLL2;DYNC1LI2;KIF18A;KIF3A;AP1G1;KIF4A;KIF3C;KIFAP3;HLA-DQA1;LGMN	.
	I-kappaB kinase/NF-kappaB signaling (GO:0007249)	22920	0.0273551	0.232308	0	0	2.17596	7.83097	NFKBIA;UBB;RIPK2;UBC;BCL3;REL;TICAM1;TNF;BIRC3;RELB	.
	regulation of neurogenesis (GO:0050767)	22920	0.0273551	0.232308	0	0	2.17596	7.83097	PER2;IL6;IL1B;BHLHE40;CTNNB1;HES1;TNF;DLL1;APPL2;ARNTL	.
	negative regulation of stress-activated MAPK cascade (GO:0032873)	13697	0.0277706	0.233796	0	0	2.63845	9.45562	PRKN;CYLD;PER1;DUSP10;GPS2;EZR;FKTN	.
	positive regulation of signaling receptor activity (GO:2000273)	13697	0.0277706	0.233796	0	0	2.63845	9.45562	IL10;ARC;NCOA3;AREG;HIF1A;EREG;HBEGF	.
	positive regulation of inflammatory response (GO:0050729)	13/89	0.0277951	0.233796	0	0	1.93651	6.93833	PTGER4;FEM1A;SERPINE1;OSM;TNF;NFKBIA;GPRC5B;IL6;IL23A;IL1B;NFKBIZ;NINJ1;CCL3	.
	post-Golgi vesicle-mediated transport (GO:0006892)	13/89	0.0277951	0.233796	0	0	1.93651	6.93833	ARFGEF2;HSPA8;SYS1;EXOC8;EXOC6B;AP4B1;KLHL20;AP1G1;DNAJC6;FTH1;GOLGB1;CCDC93;VAMP2	.
	regulation of type I interferon production (GO:0032479)	13/89	0.0277951	0.233796	0	0	1.93651	6.93833	ILRUN;CREBBP;NLRC5;TNFAIP3;NFKB1;CYLD;POLA1;TRAF3;IRF1;POLR1C;PCBP2;EP300;CTNNB1	.
	histone acetylation (GO:0016573)	26238	0.0279173	0.234378	0	0	2.07479	7.42467	PER1;CREBBP;ZZZ3;KAT6B;BEND3;EP300;TADA1;JADE3;KAT7;SUPT3H;TAF5L	.
	peptidyl-serine phosphorylation (GO:0018105)	20/156	0.0286355	0.235238	0	0	1.66664	5.92174	DYRK3;PRKCH;TNKS;PLK2;STK39;EIF2AK3;LMTK2;MASTL;HIPK1;ERN1;RPS6KA2;AKT3;MAPKAPK2;CDK1;PRKCQ;RICTOR;PKN2;CLSPN;CSNK1G1;ATR	.
	DNA replication (GO:0006260)	15/108	0.0287484	0.235238	0	0	1.82656	6.48277	BARD1;RPAIN;FEN1;DONSON;CDC6;POLA1;ORC6;POLG2;RPA4;CDK1;KAT7;RAD1;CLSPN;MCM6;ATR	.
	endoderm development (GO:0007492)	44301	0.0289095	0.235238	0	0	4.10853	14.5589	DUSP4;DUSP5;DUSP2;LAMC1	.
	fibrinolysis (GO:0042730)	44301	0.0289095	0.235238	0	0	4.10853	14.5589	SERPINB2;PLAU;SERPINE1;PLAUR	.
	histone H4-K5 acetylation (GO:0043981)	44301	0.0289095	0.235238	0	0	4.10853	14.5589	KANSL2;JADE3;KAT7;OGT	.
	histone H4-K8 acetylation (GO:0043982)	44301	0.0289095	0.235238	0	0	4.10853	14.5589	KANSL2;JADE3;KAT7;OGT	.
	macrophage differentiation (GO:0030225)	44301	0.0289095	0.235238	0	0	4.10853	14.5589	CSF1;MMP9;SIRT1;VEGFA	.
	mitochondrial RNA metabolic process (GO:0000959)	44301	0.0289095	0.235238	0	0	4.10853	14.5589	MTERF2;FOXO3;TFB1M;SLC25A33	.
	modulation by host of viral genome replication (GO:0044827)	44301	0.0289095	0.235238	0	0	4.10853	14.5589	PRKN;CCNK;YTHDC2;ZC3H12A	.
	negative regulation of endoplasmic reticulum stress-induced intrinsic apoptotic signaling pathway (GO:1902236)	44301	0.0289095	0.235238	0	0	4.10853	14.5589	PRKN;XBP1;HERPUD1;HSPA1A	.
	positive regulation of heterotypic cell-cell adhesion (GO:0034116)	44301	0.0289095	0.235238	0	0	4.10853	14.5589	IL10;IL1B;TNF;CD44	.
	positive regulation of nuclear-transcribed mRNA catabolic process, deadenylation-dependent decay (GO:1900153)	44301	0.0289095	0.235238	0	0	4.10853	14.5589	ZFP36;CPEB3;TOB1;ZFP36L2	.
	positive regulation of protein export from nucleus (GO:0046827)	44301	0.0289095	0.235238	0	0	4.10853	14.5589	TCF7L2;BAG3;IL1B;EMD	.
	regulation of extracellular matrix disassembly (GO:0010715)	44301	0.0289095	0.235238	0	0	4.10853	14.5589	IL6;FSCN1;MELTF;CLASP1	.
	regulation of microglial cell activation (GO:1903978)	44301	0.0289095	0.235238	0	0	4.10853	14.5589	IL6;SPHK1;CCL3;LDLR	.
	regulation of nuclear-transcribed mRNA catabolic process, deadenylation-dependent decay (GO:1900151)	44301	0.0289095	0.235238	0	0	4.10853	14.5589	ZFP36;CPEB3;TOB1;ZFP36L2	.
	negative regulation of interleukin-2 production (GO:0032703)	44338	0.0291384	0.235238	0	0	3.32404	11.7528	ZFP36;TNFAIP3;XCL1;EZR;CD34	.
	negative regulation of lymphocyte activation (GO:0051250)	44338	0.0291384	0.235238	0	0	3.32404	11.7528	IL4I1;FOXJ1;TNFAIP3;SAMSN1;PAG1	.
	positive regulation of signal transduction by p53 class mediator (GO:1901798)	44338	0.0291384	0.235238	0	0	3.32404	11.7528	HEXIM1;UBB;PMAIP1;HIC1;ATR	.
	regulation of membrane protein ectodomain proteolysis (GO:0051043)	44338	0.0291384	0.235238	0	0	3.32404	11.7528	IL10;IL1B;TIMP3;TIMP1;TNF	.
	rRNA methylation (GO:0031167)	44338	0.0291384	0.235238	0	0	3.32404	11.7528	NSUN4;BUD23;TFB1M;ZCCHC4;MRM3	.
	regulation of alternative mRNA splicing, via spliceosome (GO:0000381)	19968	0.029207	0.235361	0	0	2.26247	7.99409	HNRNPL;RBM4;MBNL2;RBM15;WTAP;YTHDC1;RBM7;SRSF6;RBMX	.
	mRNA-containing ribonucleoprotein complex export from nucleus (GO:0071427)	14/99	0.0295323	0.237118	0	0	1.8649	6.56868	RANBP2;NXT1;YTHDC1;EIF4A3;NUP153;WDR33;NXF1;MCM3AP;DDX39A;SRSF2;SRSF3;NUP88;SRSF6;SRSF11	.
	positive regulation of stress-activated MAPK cascade (GO:0032874)	14/99	0.0295323	0.237118	0	0	1.8649	6.56868	GADD45B;GADD45A;SPHK1;TRAF1;SH3RF1;GADD45G;VEGFA;TRAF4;TRAF3;IL1B;ZC3H12A;RELL1;ZNF622;MAP3K4	.
	SRP-dependent cotranslational protein targeting to membrane (GO:0006614)	13/90	0.0301551	0.238756	0	0	1.91126	6.69209	RPLP1;RPS5;RPLP0;RPL22;RPL36A;RPL13A;SEC61A2;RPS17;RPS16;RPS18;RPL13;RPS2;RPL28	.
	positive regulation of viral process (GO:0048524)	23285	0.0302285	0.238756	0	0	2.13479	7.46957	DDX3X;CCNT1;POLR2A;PDE12;AXL;RSF1;PKN2;TMEM39A;ADARB1;KPNA2	.
	positive regulation of secretion by cell (GO:1903532)	26604	0.0306153	0.238756	0	0	2.04067	7.1143	SLC12A2;IL1A;RAB3A;RGCC;IL1B;STXBP5;EZR;MYH10;ABCG1;CLASP1;TTN	.
	positive regulation of organelle assembly (GO:1902117)	17015	0.0307693	0.238756	0	0	2.38099	8.28878	CNOT6L;SDC4;SPAG5;G3BP2;FSCN1;TNF;ARHGAP35;TAPT1	.
	posttranscriptional regulation of gene expression (GO:0010608)	17015	0.0307693	0.238756	0	0	2.38099	8.28878	PER1;YTHDC1;NOLC1;RC3H1;TSC1;MATR3;FOXO3;PUM3	.
	regulation of B cell proliferation (GO:0030888)	17015	0.0307693	0.238756	0	0	2.38099	8.28878	IL10;TFRC;CLCF1;GPR183;CTLA4;RC3H1;IRS2;TNFRSF21	.
	positive regulation of macromolecule metabolic process (GO:0010604)	42/384	0.030937	0.238756	0	0	1.39514	4.84923	PRKN;DDX3X;TFRC;CSF1;HIF1A;TNF;TTN;HMGN5;FGF9;ZC3H12A;CCL3;E2F1;CD34;SLC38A2;NKX3-1;OSR2;PTPN1;TLE1;EIF2AK3;BRAF;SERPINB9;POU3F1;TICAM1;F3;MED26;KLF2;VEGFA;MED23;IL1A;AFDN;AHI1;IL6;RGCC;DNAJA4;IL1B;SPRY2;EZR;HSPA1B;ATF4;HSPA1A;NFE2L2;ZPR1	.
	cellular response to leptin stimulus (GO:0044320)	44264	0.0311961	0.238756	0	0	5.64729	19.5818	NR4A3;EBI3;SIRT1	.
	endothelial cell chemotaxis (GO:0035767)	44264	0.0311961	0.238756	0	0	5.64729	19.5818	NR4A1;EGR3;VEGFA	.
	inner ear receptor cell development (GO:0060119)	44264	0.0311961	0.238756	0	0	5.64729	19.5818	SLC4A7;ADGRV1;WHRN	.
	kinetochore assembly (GO:0051382)	44264	0.0311961	0.238756	0	0	5.64729	19.5818	CENPF;MIS12;CENPC	.
	L-ascorbic acid metabolic process (GO:0019852)	44264	0.0311961	0.238756	0	0	5.64729	19.5818	GSTO2;SLC2A1;SLC2A3	.
	negative regulation of fibrinolysis (GO:0051918)	44264	0.0311961	0.238756	0	0	5.64729	19.5818	THBD;SERPINE1;THBS1	.
	negative regulation of nitric oxide biosynthetic process (GO:0045019)	44264	0.0311961	0.238756	0	0	5.64729	19.5818	ZC3H12A;CD34;GLA	.
	negative regulation of nitric oxide metabolic process (GO:1904406)	44264	0.0311961	0.238756	0	0	5.64729	19.5818	ZC3H12A;CD34;GLA	.
	negative regulation of smooth muscle cell differentiation (GO:0051151)	44264	0.0311961	0.238756	0	0	5.64729	19.5818	NFATC3;FOXO4;EREG	.
	ornithine metabolic process (GO:0006591)	44264	0.0311961	0.238756	0	0	5.64729	19.5818	ARG2;ODC1;AZIN1	.
	positive regulation of extracellular matrix assembly (GO:1901203)	44264	0.0311961	0.238756	0	0	5.64729	19.5818	PHLDB1;RGCC;CLASP1	.
	positive regulation of smooth muscle contraction (GO:0045987)	44264	0.0311961	0.238756	0	0	5.64729	19.5818	SPHK1;SRF;PROK2	.
	positive regulation of tumor necrosis factor-mediated signaling pathway (GO:1903265)	44264	0.0311961	0.238756	0	0	5.64729	19.5818	PRKN;HSPA1B;HSPA1A	.
	protein K6-linked ubiquitination (GO:0085020)	44264	0.0311961	0.238756	0	0	5.64729	19.5818	BARD1;PRKN;UBE2S	.
	regulation of CD8-positive, alpha-beta T cell activation (GO:2001185)	44264	0.0311961	0.238756	0	0	5.64729	19.5818	IRF1;CRTAM;SH3RF1	.
	regulation of epidermis development (GO:0045682)	44264	0.0311961	0.238756	0	0	5.64729	19.5818	KLF7;MAFG;MAFF	.
	regulation of fibroblast apoptotic process (GO:2000269)	44264	0.0311961	0.238756	0	0	5.64729	19.5818	BCL2L11;BTG1;STK17B	.
	regulation of PERK-mediated unfolded protein response (GO:1903897)	44264	0.0311961	0.238756	0	0	5.64729	19.5818	PPP1R15A;PPP1R15B;PTPN1	.
	regulation of peroxisome proliferator activated receptor signaling pathway (GO:0035358)	44264	0.0311961	0.238756	0	0	5.64729	19.5818	ASXL1;GPS2;SIRT1	.
	response to leptin (GO:0044321)	44264	0.0311961	0.238756	0	0	5.64729	19.5818	NR4A3;CCND1;SIRT1	.
	peptidyl-lysine trimethylation (GO:0018023)	44377	0.0315271	0.240455	0	0	2.82609	9.76955	CSKMT;KMT5C;TET3;BEND3;VCPKMT;OGT	.
	termination of RNA polymerase I transcription (GO:0006363)	44377	0.0315271	0.240455	0	0	2.82609	9.76955	TAF1D;CCNH;POLR1C;POLR1F;MNAT1;POLR1H	.
	regulation of phosphoprotein phosphatase activity (GO:0043666)	14062	0.0317286	0.241159	0	0	2.5532	8.80991	PPP1R15A;PPP1R15B;HSP90AB1;ITGA1;CRY2;TSC1;MASTL	.
	sterol biosynthetic process (GO:0016126)	14062	0.0317286	0.241159	0	0	2.5532	8.80991	IDI1;SQLE;HMGCS1;INSIG1;CYP51A1;DHCR7;ACAT2	.
	antigen processing and presentation of peptide antigen via MHC class II (GO:0002495)	14/100	0.0318633	0.241767	0	0	1.84311	6.35192	DCTN6;SEC24B;DCTN4;IFI30;DYNLL2;DYNC1LI2;KIF18A;KIF3A;AP1G1;KIF4A;KIF3C;KIFAP3;HLA-DQA1;LGMN	.
	DNA-templated transcription, initiation (GO:0006352)	21/168	0.0324344	0.245678	0	0	1.61905	5.55097	CREBBP;CCNH;MAML1;TAF13;NR1H2;RORA;NR1D2;RSF1;TFB1M;NAT14;MED26;NR4A2;MED23;NR4A1;TAF1D;NR4A3;POLR2A;POLR1C;POLR1F;MNAT1;POLR1H	.
	regulation of innate immune response (GO:0045088)	23651	0.0333085	0.251867	0	0	2.09514	7.12756	TASL;AKIRIN2;PTPN1;HSP90AB1;IRF1;TNFAIP3;LRP8;APPL2;EREG;BIRC3	.
	positive regulation of response to external stimulus (GO:0032103)	18/139	0.0334594	0.252576	0	0	1.68521	5.72537	PTGER4;AKIRIN2;TASL;FEM1A;SERPINE1;OSM;TNF;THBS1;EREG;NFKBIA;THBD;GPRC5B;IL23A;IL1B;NINJ1;NFKBIZ;CCL3;ZCCHC3	.
	regulation of cell migration (GO:0030334)	44/408	0.0340389	0.256512	0	0	1.37329	4.64208	FLT1;SERPINE2;CSF1;SERPINE1;NEDD9;ADARB1;FOXO3;THBS1;CXCL16;DUSP10;FGF9;PLAU;TP53INP1;LMNA;CCL3;ENPP2;SRGAP1;APPL2;SEMA6B;SPAG9;EPHA4;XBP1;HACE1;JAG1;YTHDF3;SPHK1;ARHGEF39;SOD2;F3;MMP9;VEGFA;SMAD7;PTP4A1;AFDN;FER;IL1B;DLC1;SPATA13;SNAI1;MYADM;CASS4;SPRY2;CEP43;HBEGF	.
	epidermal growth factor receptor signaling pathway (GO:0007173)	17380	0.0345292	0.258357	0	0	2.31981	7.80836	DGKD;PIK3CA;GAB1;BRAF;PIK3R1;AREG;EREG;HBEGF	.
	histone deacetylation (GO:0016575)	17380	0.0345292	0.258357	0	0	2.31981	7.80836	HDAC4;ELK4;PER2;PER1;SFPQ;MIDEAS;BRMS1L;SIRT1	.
	positive regulation of cell cycle G2/M phase transition (GO:1902751)	44339	0.0348103	0.258357	0	0	3.1392	10.5409	DYRK3;CCND1;CDK1;CDC25C;DTL	.
	positive regulation of mRNA processing (GO:0050685)	44339	0.0348103	0.258357	0	0	3.1392	10.5409	DAZAP1;RBMXL1;TRA2A;PAF1;RBMX	.
	positive regulation of transcription initiation from RNA polymerase II promoter (GO:0060261)	44339	0.0348103	0.258357	0	0	3.1392	10.5409	MED14;PAXIP1;MED13;MED30;SRF	.
	regulation of B cell receptor signaling pathway (GO:0050855)	44339	0.0348103	0.258357	0	0	3.1392	10.5409	ELF1;PRKCH;ELF2;GPS2;SLC39A10	.
	regulation of interferon-gamma-mediated signaling pathway (GO:0060334)	44339	0.0348103	0.258357	0	0	3.1392	10.5409	SOCS3;HSP90AB1;SOCS1;NR1H2;NLRC5	.
	regulation of interleukin-4 production (GO:0032673)	44339	0.0348103	0.258357	0	0	3.1392	10.5409	SLC7A5;IRF4;DDIT3;NLRP3;PRKCQ	.
	regulation of protein export from nucleus (GO:0046825)	44339	0.0348103	0.258357	0	0	3.1392	10.5409	BARD1;TCF7L2;BAG3;IL1B;EMD	.
	nuclear-transcribed mRNA catabolic process, deadenylation-dependent decay (GO:0000288)	20699	0.0360178	0.259393	0	0	2.16596	7.19908	HBS1L;DDX6;ZFP36;CNOT6L;PDE12;RC3H1;SAMD4B;DCP1A;RC3H2	.
	negative regulation of protein secretion (GO:0050709)	14427	0.0360468	0.259393	0	0	2.47328	8.21855	PRKN;MIDN;RAB11FIP1;IL1B;CYP51A1;BMP8A;IL12A	.
	protein acylation (GO:0043543)	14427	0.0360468	0.259393	0	0	2.47328	8.21855	ZDHHC18;CREBBP;SPHK1;ZDHHC23;EP300;SELENOK;CLOCK	.
	regulation of nitric-oxide synthase activity (GO:0050999)	14427	0.0360468	0.259393	0	0	2.47328	8.21855	IL1A;IL1B;NPR3;WASL;HIF1A;TNF;GLA	.
	regulation of protein tyrosine kinase activity (GO:0061097)	14427	0.0360468	0.259393	0	0	2.47328	8.21855	EFNA1;EPHA4;PTPN1;GPRC5B;CASS4;NEDD9;LRP8	.
	cilium assembly (GO:0060271)	35/314	0.0361041	0.259393	0	0	1.42384	4.72908	C2CD3;PTPDC1;IFT74;CFAP298;TUBA1A;ARL13B;KIF3A;TCTN2;TMEM67;KIF3C;CEP97;KIFAP3;IFT57;CFAP20;YWHAG;CLASP1;EXOC8;DNAAF1;WDR19;FOXJ1;HAUS6;BBIP1;TUBB4B;DYNLL2;TUBA4A;TMEM231;AHI1;RILPL2;MAK;AKAP9;CDK1;WDPCP;B9D2;IFT46;CEP43	.
	negative regulation of DNA replication (GO:0008156)	44302	0.0361247	0.259393	0	0	3.76595	12.5059	TSPYL2;GMNN;CDC6;ATR	.
	negative regulation of epithelial cell differentiation (GO:0030857)	44302	0.0361247	0.259393	0	0	3.76595	12.5059	SPRY2;SPRY1;DLL1;MMP9	.
	platelet-derived growth factor receptor signaling pathway (GO:0048008)	44302	0.0361247	0.259393	0	0	3.76595	12.5059	PTPN1;FER;NR4A3;ABL1	.
	positive regulation of alpha-beta T cell proliferation (GO:0046641)	44302	0.0361247	0.259393	0	0	3.76595	12.5059	IL23A;EBI3;XCL1;CD55	.
	positive regulation of immunoglobulin mediated immune response (GO:0002891)	44302	0.0361247	0.259393	0	0	3.76595	12.5059	PAXIP1;TFRC;KMT5C;XCL1	.
	positive regulation of isotype switching (GO:0045830)	44302	0.0361247	0.259393	0	0	3.76595	12.5059	PAXIP1;TFRC;KMT5C;CLCF1	.
	positive regulation of myeloid leukocyte cytokine production involved in immune response (GO:0061081)	44302	0.0361247	0.259393	0	0	3.76595	12.5059	GPRC5B;NR4A3;TICAM1;SIRT1	.
	regulation of blood vessel endothelial cell proliferation involved in sprouting angiogenesis (GO:1903587)	44302	0.0361247	0.259393	0	0	3.76595	12.5059	PPP1R16B;IL12A;THBS1;VEGFA	.
	regulation of ceramide biosynthetic process (GO:2000303)	44302	0.0361247	0.259393	0	0	3.76595	12.5059	SMPD2;SAMD8;SPHK1;TNF	.
	regulation of defense response to virus (GO:0050688)	44302	0.0361247	0.259393	0	0	3.76595	12.5059	ILRUN;TRAF3;PCBP2;TNFAIP3	.
	regulation of isotype switching (GO:0045191)	44302	0.0361247	0.259393	0	0	3.76595	12.5059	IL10;PAXIP1;TFRC;KMT5C	.
	regulation of rRNA processing (GO:2000232)	44302	0.0361247	0.259393	0	0	3.76595	12.5059	USP36;WDR75;BUD23;WDR43	.
	sphingolipid catabolic process (GO:0030149)	44302	0.0361247	0.259393	0	0	3.76595	12.5059	SMPD2;SPHK1;ENPP2;GLA	.
	T cell mediated immunity (GO:0002456)	44302	0.0361247	0.259393	0	0	3.76595	12.5059	JAG1;CRTAM;GNL1;CD55	.
	negative regulation of DNA binding (GO:0043392)	11475	0.0364901	0.260324	0	0	2.7129	8.98164	ILRUN;NFKBIA;PER2;TNKS;E2F1;RSF1	.
	negative regulation of proteasomal ubiquitin-dependent protein catabolic process (GO:0032435)	11475	0.0364901	0.260324	0	0	2.7129	8.98164	HSP90AB1;RYBP;TRIM39;MAP1A;NOP53;OGT	.
	protein acetylation (GO:0006473)	11475	0.0364901	0.260324	0	0	2.7129	8.98164	CREBBP;SPHK1;EP300;NAA35;SIRT1;CLOCK	.
	regulation of macrophage derived foam cell differentiation (GO:0010743)	11475	0.0364901	0.260324	0	0	2.7129	8.98164	NFKBIA;PRKCH;CSF1;NR1H2;NFKB1;ABCG1	.
	regulation of cell-matrix adhesion (GO:0001952)	24016	0.0366015	0.260697	0	0	2.05694	6.80366	JAG1;CDK6;CSF1;PLAU;RASA1;CASK;TSC1;UTRN;THBS1;CLASP1	.
	positive regulation of cell motility (GO:2000147)	26/221	0.0369722	0.262913	0	0	1.51183	4.9854	FLT1;CSF1;NEDD9;THBS1;CXCL16;PLAU;CCL3;CFAP20;SEMA6B;SPAG9;XBP1;SPHK1;ARHGEF39;SOD2;F3;MMP9;VEGFA;PTP4A1;FER;IL1B;SNAI1;MYADM;CASS4;SPRY2;CEP43;HBEGF	.
	cytoplasmic translation (GO:0002181)	13/93	0.0381036	0.270524	0	0	1.83929	6.00977	RPLP1;RPS5;RPLP0;RPL22;RPL36A;RPL13A;RPS17;RPS16;RPS18;RPL13;ETF1;RPS2;RPL28	.
	cellular response to ionizing radiation (GO:0071479)	17746	0.0385882	0.273086	0	0	2.26169	7.36137	NET1;CDKN1A;GADD45A;MDM2;RAD1;SIRT1;CLOCK;ATR	.
	histone H4 acetylation (GO:0043967)	17746	0.0385882	0.273086	0	0	2.26169	7.36137	PER1;ZZZ3;KANSL2;BEND3;EP300;JADE3;KAT7;OGT	.
	positive regulation of phosphorylation (GO:0042327)	29/253	0.038807	0.274194	0	0	1.46837	4.77096	PFKFB3;FLT1;TFRC;ZBTB20;HIF1A;TNF;THBS1;DSTYK;CCND1;FGF9;ABL1;ZNF622;FNIP1;PDE8A;NKX3-1;EPHA4;RYK;LIMK2;PLAUR;LMTK2;SIRT1;MMP9;EREG;VEGFA;EFNA1;AXL;IL1B;PRXL2C;MET	.
	regulation of mRNA catabolic process (GO:0061013)	16/122	0.0390689	0.275604	0	0	1.70923	5.54204	HSPA8;YTHDF3;RC3H1;SAMD4B;ZC3HAV1;GTPBP1;RC3H2;ZFP36L2;ZFP36;UBB;ZC3H12A;MAPKAPK2;PSME4;UBC;DCP1A;HSPA1A	.
	protein targeting to ER (GO:0045047)	14/103	0.0396552	0.277168	0	0	1.78069	5.74725	SGTB;RPS5;EDEM1;RPLP1;RPL22;RPLP0;RPL36A;RPL13A;RPS17;RPS16;RPS18;RPL13;RPS2;RPL28	.
	positive regulation of gene expression, epigenetic (GO:0045815)	21064	0.0398003	0.277168	0	0	2.12072	6.83694	TAF1D;SERTAD1;SERTAD2;POLR1C;EP300;DDX21;POLR1F;POLR1H;ATAD2B	.
	positive regulation of interferon-gamma production (GO:0032729)	21064	0.0398003	0.277168	0	0	2.12072	6.83694	SLC7A5;FZD5;IL23A;PDE4D;IL1B;EBI3;CRTAM;PDE4B;IL12A	.
	positive regulation of metabolic process (GO:0009893)	15/113	0.0408166	0.277168	0	0	1.73289	5.54295	KDM6B;KDM3A;CXCR4;G0S2;TNF;ACACA;GADD45G;VEGFA;PER2;IRF4;SCD;PIGA;BEND3;OGT;APPL2	.
	hemopoiesis (GO:0030097)	13/94	0.0410556	0.277168	0	0	1.81648	5.79971	IL10;FLT1;JAG1;HIPK1;DLL1;RUNX2;ZFP36L2;MELK;PGM3;SBDS;TOX;CD34;ATF4	.
	regulation of kinase activity (GO:0043549)	13/94	0.0410556	0.277168	0	0	1.81648	5.79971	TSPYL2;EPHA4;CDKN1B;FLT1;RYK;NLRC5;LMTK2;IRS2;TTN;DSTYK;AXL;ZNF622;MET	.
	cellular response to catecholamine stimulus (GO:0071870)	44340	0.0411181	0.277168	0	0	2.97381	9.49035	PRKN;NR4A3;ABL1;PDE4B;ATF4	.
	negative regulation of NIK/NF-kappaB signaling (GO:1901223)	44340	0.0411181	0.277168	0	0	2.97381	9.49035	CYLD;PPM1A;DDX3X;ZC3H12A;NLRP3	.
	negative regulation of stress fiber assembly (GO:0051497)	44340	0.0411181	0.277168	0	0	2.97381	9.49035	DLC1;STMN1;PIK3R1;MET;CLASP1	.
	positive regulation of carbohydrate metabolic process (GO:0045913)	44340	0.0411181	0.277168	0	0	2.97381	9.49035	PFKFB3;PRXL2C;ZBTB20;HIF1A;NFKB1	.
	protein kinase B signaling (GO:0043491)	44340	0.0411181	0.277168	0	0	2.97381	9.49035	PLK3;IL1B;CCL3;TNF;NKX3-1	.
	cellular protein modification process (GO:0006464)	99/1025	0.041629	0.277168	0	0	1.219	3.87515	RAB3A;CCNT1;CSF1;MAML1;TESK2;STK19;DCAF4;SIK1B;AKT3;PIM3;PIM2;CDKL5;PRKCH;FBXW8;LMTK2;ERN1;MELK;CCNE1;MAK;PSME4;MAPKAPK2;SIK1;OBSL1;MTMR2;EPB42;TNKS;DCUN1D3;STK39;KLHL11;ZC3HAV1;MTMR4;HIF1A;FBXO41;SOCS3;ABL1;ABL2;MAP3K21;ST3GAL1;CDK17;YES1;KLHL25;TIPARP;PLK2;EIF2AK3;KLHL21;BRAF;FBXO32;SSH2;KLHL20;PTPRE;IL6;FER;CDK6;UBE2S;UST;CDK1;MELTF;CDK12;DYRK3;LAMC1;DUSP16;ANKRD9;DUSP10;UBXN7;TIMP1;DUSP4;DUSP…	.
	adherens junction assembly (GO:0034333)	44265	0.0419205	0.277168	0	0	4.84027	15.3533	CTNNB1;JAM3;SMAD7	.
	cellular response to dopamine (GO:1903351)	44265	0.0419205	0.277168	0	0	4.84027	15.3533	PRKN;ABL1;ATF4	.
	endothelium development (GO:0003158)	44265	0.0419205	0.277168	0	0	4.84027	15.3533	KDM6B;JAG1;CD34	.
	glycosphingolipid catabolic process (GO:0046479)	44265	0.0419205	0.277168	0	0	4.84027	15.3533	NEU4;NEU1;GLA	.
	inner ear receptor cell stereocilium organization (GO:0060122)	44265	0.0419205	0.277168	0	0	4.84027	15.3533	ADGRV1;WHRN;PLS1	.
	lipid phosphorylation (GO:0046834)	44265	0.0419205	0.277168	0	0	4.84027	15.3533	DGKE;DGKD;DGKH	.
	negative regulation of cholesterol storage (GO:0010887)	44265	0.0419205	0.277168	0	0	4.84027	15.3533	NR1H2;ABCG1;TTC39B	.
	negative regulation of heterotypic cell-cell adhesion (GO:0034115)	44265	0.0419205	0.277168	0	0	4.84027	15.3533	IL10;IL1RN;MYADM	.
	negative regulation of hormone secretion (GO:0046888)	44265	0.0419205	0.277168	0	0	4.84027	15.3533	RAB11FIP1;IL1B;OSM	.
	negative regulation of lymphocyte apoptotic process (GO:0070229)	44265	0.0419205	0.277168	0	0	4.84027	15.3533	BCL6;IRS2;PRKCQ	.
	negative regulation of transcription from RNA polymerase II promoter in response to stress (GO:0097201)	44265	0.0419205	0.277168	0	0	4.84027	15.3533	DNAJB1;BAG3;HSPA1A	.
	negative regulation of transmembrane transport (GO:0034763)	44265	0.0419205	0.277168	0	0	4.84027	15.3533	IL1B;IRS2;THBS1	.
	phosphatidylcholine catabolic process (GO:0034638)	44265	0.0419205	0.277168	0	0	4.84027	15.3533	LIPC;PNPLA8;ENPP2	.
	positive regulation of rRNA processing (GO:2000234)	44265	0.0419205	0.277168	0	0	4.84027	15.3533	WDR75;BUD23;WDR43	.
	regulation of cell-cell adhesion involved in gastrulation (GO:0070587)	44265	0.0419205	0.277168	0	0	4.84027	15.3533	IL10;IL1RN;MYADM	.
	regulation of endoplasmic reticulum unfolded protein response (GO:1900101)	44265	0.0419205	0.277168	0	0	4.84027	15.3533	ERN1;XBP1;PIK3R1	.
	regulation of hair cycle (GO:0042634)	44265	0.0419205	0.277168	0	0	4.84027	15.3533	PER1;CLOCK;ARNTL	.
	regulation of hydrogen peroxide-induced cell death (GO:1903205)	44265	0.0419205	0.277168	0	0	4.84027	15.3533	PYCR1;PDE8A;NFE2L2	.
	regulation of phospholipid metabolic process (GO:1903725)	44265	0.0419205	0.277168	0	0	4.84027	15.3533	MTMR2;MTMR9;MTMR4	.
	regulation of protein neddylation (GO:2000434)	44265	0.0419205	0.277168	0	0	4.84027	15.3533	DCUN1D3;DCUN1D2;HIF1A	.
	regulation of T-helper 17 type immune response (GO:2000316)	44265	0.0419205	0.277168	0	0	4.84027	15.3533	IL23A;PRKCQ;SMAD7	.
	regulation of tau-protein kinase activity (GO:1902947)	44265	0.0419205	0.277168	0	0	4.84027	15.3533	HSP90AB1;C5AR1;NAB2	.
	response to dopamine (GO:1903350)	44265	0.0419205	0.277168	0	0	4.84027	15.3533	PRKN;ABL1;ATF4	.
	response to laminar fluid shear stress (GO:0034616)	44265	0.0419205	0.277168	0	0	4.84027	15.3533	KLF2;NFE2L2;SMAD7	.
	SNARE complex assembly (GO:0035493)	44265	0.0419205	0.277168	0	0	4.84027	15.3533	UVRAG;VAMP1;VAMP2	.
	UV protection (GO:0009650)	44265	0.0419205	0.277168	0	0	4.84027	15.3533	MFAP4;FEN1;ERCC5	.
	Wnt signaling pathway involved in midbrain dopaminergic neuron differentiation (GO:1904953)	44265	0.0419205	0.277168	0	0	4.84027	15.3533	RYK;CTNNB1;WNT1	.
	negative regulation of cell-matrix adhesion (GO:0001953)	11841	0.0419267	0.277168	0	0	2.60842	8.27346	JAG1;DLC1;RASA1;SERPINE1;CASK;THBS1	.
	RNA biosynthetic process (GO:0032774)	11841	0.0419267	0.277168	0	0	2.60842	8.27346	POLA1;POLR2A;TAF13;RSF1;SMN1;NAT14	.
	transcription initiation from RNA polymerase I promoter (GO:0006361)	11841	0.0419267	0.277168	0	0	2.60842	8.27346	TAF1D;CCNH;POLR1C;POLR1F;MNAT1;POLR1H	.
	protein-DNA complex assembly (GO:0065004)	18/143	0.0425649	0.2807	0	0	1.63093	5.14839	H2AX;H2BC9;CCNH;GMNN;H4-16;RSF1;CDC6;SPTY2D1;H2BC12;ORC6;H2BC15;UBB;KAT6B;PSME4;UBC;ERCC5;MCM6;MNAT1	.
	rRNA processing (GO:0006364)	21/173	0.0425881	0.2807	0	0	1.56536	4.94056	DDX47;RPLP1;RPL22;RPLP0;WDR74;RPL36A;WDR75;NOLC1;RPL13A;TFB1M;WDR43;RCL1;RPS17;RPS16;SBDS;RPL13;RRP12;RPS2;RPL28;NOP53;RRP15	.
	cellular response to mechanical stimulus (GO:0071260)	18111	0.0429541	0.28185	0	0	2.20641	6.94494	PTGER4;MAP3K2;GADD45A;IL1B;IRF1;TNFRSF10B;TNFRSF10A;NFKB1	.
	regulation of cellular protein metabolic process (GO:0032268)	18111	0.0429541	0.28185	0	0	2.20641	6.94494	NFKBIA;CSF1;NR1H2;NOLC1;TSC1;FOXO3;NFKB1;PUM3	.
	response to hydrogen peroxide (GO:0042542)	18111	0.0429541	0.28185	0	0	2.20641	6.94494	OSER1;NET1;IL6;PPIF;ABL1;TNFAIP3;SIRT1;NFE2L2	.
	cellular response to hormone stimulus (GO:0032870)	28065	0.0432664	0.282572	0	0	1.91467	6.01279	NCOA2;XBP1;NR4A3;NCOA3;KLF9;ARID5A;SRA1;SERPINB9;ATP1A1;TFPI;NKX3-1	.
	regulation of T cell proliferation (GO:0042129)	28065	0.0432664	0.282572	0	0	1.91467	6.01279	IL10;IL4I1;IL6;PNP;TFRC;SDC4;IL23A;IL1B;TNFSF9;SLC7A1;TNFRSF21	.
	RNA transport (GO:0050658)	28065	0.0432664	0.282572	0	0	1.91467	6.01279	NXF1;ZFP36;ARC;DDX39A;EIF4A3;SIDT1;SRSF2;SRSF3;NUP153;SRSF6;SRSF11	.
	regulation of protein phosphorylation (GO:0001932)	30/266	0.04332	0.282572	0	0	1.44171	4.52573	PRKN;PPP1R15B;TFRC;TNF;TTN;SOCS1;CCND1;FGF9;ZC3H12A;SESN2;ABL1;FNIP1;PDE8A;NKX3-1;TSPYL2;LIMK2;PAQR3;EIF2AK3;PLAUR;SIRT1;MMP9;VEGFA;EFNA1;FER;IL1B;MYADM;NOP53;PPIL4;ATF3;ATF4	.
	response to lipid (GO:0033993)	15/114	0.043608	0.283822	0	0	1.71529	5.37318	GPX3;FOXO3;STRN3;ASXL1;FER;SCD;IL1B;NOCT;MAPKAPK2;PELI1;CTNNB1;IL12A;ABCG1;NKX3-1;HNRNPA0	.
	nucleosome assembly (GO:0006334)	21429	0.0438429	0.283822	0	0	2.07732	6.49609	H2AX;H2BC12;H2BC9;H2BC15;NASP;KAT6B;H4-16;RSF1;SPTY2D1	.
	positive regulation of mitochondrion organization (GO:0010822)	21429	0.0438429	0.283822	0	0	2.07732	6.49609	HRK;PRKN;MOAP1;BCL2L11;PLAUR;PPIF;PMAIP1;DDHD1;MMP9	.
	positive regulation of mitotic cell cycle phase transition (GO:1901992)	21429	0.0438429	0.283822	0	0	2.07732	6.49609	KLHL18;DDX3X;RGCC;CCND1;UBE2C;CDCA5;CDK1;CDC25C;DTL	.
	cellular response to tumor necrosis factor (GO:0071356)	23/194	0.0441411	0.283822	0	0	1.52425	4.75623	TNFRSF12A;CCL3L1;CCL20;TRAF1;FOXO3;SIRT1;TNF;YBX3;ZFP36L2;NFKBIA;ZFP36;TRAF3;ZC3H12A;PSME4;CCL4;CCL3;TNFSF9;XCL1;TNFRSF21;GSDME;NFE2L2;NKX3-1;BIRC3	.
	negative regulation of cell aging (GO:0090344)	44303	0.044283	0.283822	0	0	3.47607	10.8355	CDK6;AKT3;WNT1;SIRT1	.
	negative regulation of cytokine production involved in immune response (GO:0002719)	44303	0.044283	0.283822	0	0	3.47607	10.8355	IL10;XCL1;TNF;SMAD7	.
	negative regulation of intrinsic apoptotic signaling pathway by p53 class mediator (GO:1902254)	44303	0.044283	0.283822	0	0	3.47607	10.8355	PRKN;MDM2;SIRT1;CD44	.
	negative regulation of vascular associated smooth muscle cell proliferation (GO:1904706)	44303	0.044283	0.283822	0	0	3.47607	10.8355	IL10;CDKN1A;CDKN1B;SOD2	.
	positive regulation of blood coagulation (GO:0030194)	44303	0.044283	0.283822	0	0	3.47607	10.8355	THBD;SERPINE1;F3;THBS1	.
	positive regulation of cytokine production involved in inflammatory response (GO:1900017)	44303	0.044283	0.283822	0	0	3.47607	10.8355	IL6;TICAM1;HIF1A;TNF	.
	protein localization to chromosome, centromeric region (GO:0071459)	44303	0.044283	0.283822	0	0	3.47607	10.8355	MTBP;MIS12;CDK1;KNL1	.
	negative regulation of cell-cell adhesion (GO:0022408)	15158	0.0458032	0.293141	0	0	2.32754	7.17673	IL10;IL1RN;JAG1;RGCC;MYADM;WNT1;VEGFA	.
	regulation of protein secretion (GO:0050708)	16/125	0.0471866	0.301557	0	0	1.66191	5.07488	SLC12A2;CYP51A1;SLC2A1;TNF;ARNTL;TTN;PER2;IL1A;IL6;IL1B;IL12A;STXBP5;EZR;CLOCK;MYH10;ABCG1	.
	positive regulation of cell morphogenesis involved in differentiation (GO:0010770)	18476	0.0476337	0.303141	0	0	2.15376	6.55649	CDKL5;FBXW8;SS18L1;MYADM;ABL1;CASS4;NEDD9;OBSL1	.
	regulation of tyrosine phosphorylation of STAT protein (GO:0042509)	25112	0.0478146	0.303141	0	0	1.95022	5.92951	SOCS3;IL6;SOCS1;IL23A;CLCF1;OSM;IL12A;HES1;TNF;VEGFA	.
	negative regulation of smooth muscle cell proliferation (GO:0048662)	12206	0.0478463	0.303141	0	0	2.51167	7.63488	IL10;CDKN1A;CDKN1B;TNFAIP3;IL12A;SOD2	.
	positive regulation of telomere maintenance via telomerase (GO:0032212)	12206	0.0478463	0.303141	0	0	2.51167	7.63488	TNKS;CTNNB1;NAF1;PRKCQ;MAP3K4;ATR	.
	regulation of sprouting angiogenesis (GO:1903670)	12206	0.0478463	0.303141	0	0	2.51167	7.63488	PPP1R16B;CEMIP2;DLL1;THBS1;KLF2;VEGFA	.
	signal transduction by p53 class mediator (GO:0072331)	12206	0.0478463	0.303141	0	0	2.51167	7.63488	PAXIP1;SESN2;BCL3;JMY;TP53BP2;PMAIP1	.
	negative regulation of response to endoplasmic reticulum stress (GO:1903573)	44341	0.0480721	0.303266	0	0	2.82497	8.57393	PRKN;XBP1;NR1H2;HERPUD1;HSPA1A	.
	positive regulation of DNA-templated transcription, elongation (GO:0032786)	44341	0.0480721	0.303266	0	0	2.82497	8.57393	CCNK;CCNT1;ELL;KAT7;CDK12	.
	regulation of spindle assembly (GO:0090169)	44341	0.0480721	0.303266	0	0	2.82497	8.57393	SPAG5;CHMP1B;CEP97;HSPA1B;HSPA1A	.
	positive regulation of tyrosine phosphorylation of STAT protein (GO:0042531)	21794	0.0481514	0.303333	0	0	2.03567	6.175	SOCS3;IL6;IL23A;CLCF1;OSM;IL12A;HES1;TNF;VEGFA	.
	peptidyl-lysine modification (GO:0018205)	14/106	0.0487146	0.304289	0	0	1.72234	5.20454	HDAC4;RANBP2;ZNF451;EGR2;USPL1;NUP153;SENP2;SIRT1;TOPORS;CTH;EP300;VCPKMT;NUP88;EEF1AKMT2	.
	regulation of phosphatidylinositol 3-kinase signaling (GO:0014066)	14/106	0.0487146	0.304289	0	0	1.72234	5.20454	PPP1R16B;FLT1;GAB1;OSM;IRS2;PIK3R1;TNF;SIRT1;EPOR;PIK3CA;PIP5K1B;NOP53;IER3;NKX3-1	.
	RNA export from nucleus (GO:0006405)	14/106	0.0487146	0.304289	0	0	1.72234	5.20454	RANBP2;NXT1;YTHDC1;EIF4A3;NUP153;WDR33;NXF1;MCM3AP;DDX39A;SRSF2;SRSF3;NUP88;SRSF6;SRSF11	.
	positive regulation of cell migration (GO:0030335)	30/269	0.0489896	0.304289	0	0	1.42338	4.29312	FLT1;CSF1;NEDD9;HIF1A;THBS1;CXCL16;PLAU;ENPP2;CCL3;CLASP1;SEMA6B;SPAG9;XBP1;SMURF2;SPHK1;ARHGEF39;GAB1;SOD2;F3;MMP9;VEGFA;PTP4A1;FER;IL1B;SNAI1;MYADM;CASS4;SPRY2;CEP43;HBEGF	.
	regulation of cell differentiation (GO:0045595)	19/156	0.0503566	0.304289	0	0	1.57069	4.69419	PHLDB1;CASZ1;CREBBP;HSP90AB1;CSF1;SRF;GPS2;NR1D2;TNF;DLL1;RUNX2;SMAD7;CDK6;MAFB;BCL6;SIK1;YWHAG;CLASP1;ATF4	.
	negative regulation of protein serine/threonine kinase activity (GO:0071901)	28795	0.0507746	0.304289	0	0	1.85731	5.53546	HEXIM1;PTPN1;CDKN1B;GADD45A;IL1B;PRKAR2A;PAQR3;ABL1;SPRY2;SPRY1;SIRT1	.
	cellular response to oxygen-containing compound (GO:1901701)	35/323	0.0508143	0.304289	0	0	1.37866	4.10783	NDUFA13;KCNE1;INSIG1;SERPINE1;TNFAIP3;RORA;CXCL3;CXCL2;ZFP36;ZC3H12A;SESN2;NRIP1;PDE4B;ADNP2;ABL2;NLRP3;IP6K2;IL10;XBP1;ERCC6L2;NCOA3;TICAM1;MMP9;NFKB1;IL1A;FER;IL6;NR4A3;AXL;IL1B;AKAP9;PAF1;EZR;CPEB3;NFKBIB	.
	histone H3 acetylation (GO:0043966)	15523	0.0512574	0.304289	0	0	2.26091	6.71694	PER1;KAT6B;TADA1;JADE3;KAT7;TAF5L;SUPT3H	.
	monocyte chemotaxis (GO:0002548)	15523	0.0512574	0.304289	0	0	2.26091	6.71694	IL6;FLT1;CCL3L1;CCL20;CCL4;CCL3;XCL1	.
	nucleic acid-templated transcription (GO:0097659)	15523	0.0512574	0.304289	0	0	2.26091	6.71694	NR4A2;POLR2A;BCL3;E2F1;MLF1;TOPORS;NFKBIB	.
	phosphatidylinositol phosphate biosynthetic process (GO:0046854)	15523	0.0512574	0.304289	0	0	2.26091	6.71694	SOCS3;SOCS1;PIK3CA;PIK3R1;SOCS4;PI4K2A;IP6K2	.
	positive regulation of multicellular organismal process (GO:0051240)	37/345	0.0518708	0.304289	0	0	1.36301	4.03313	PTGER4;KDM3A;PAXIP1;TFRC;SERPINE1;CXCR4;TNF;SCAMP5;HCAR2;APPL2;TAPT1;IL10;KDM6B;XBP1;PRKCH;SMURF2;KMT5C;NCOA3;CRTAM;G0S2;FOXJ1;SIRT1;EREG;GADD45G;VEGFA;PER2;IL1A;IL6;RGCC;IL23A;BAMBI;IRF4;SCD;IL1B;SNAI1;CTNNB1;OGT	.
	mRNA export from nucleus (GO:0006406)	14/107	0.05203	0.304289	0	0	1.70373	5.03612	RANBP2;NXT1;YTHDC1;EIF4A3;NUP153;WDR33;NXF1;MCM3AP;DDX39A;SRSF2;SRSF3;NUP88;SRSF6;SRSF11	.
	cholesterol transport (GO:0030301)	18841	0.0526331	0.304289	0	0	2.10355	6.19372	STARD4;LIPC;STARD5;NPC1;OSBP;RELCH;LDLR;ABCG1	.
	regulation of protein modification process (GO:0031399)	18841	0.0526331	0.304289	0	0	2.10355	6.19372	PPP1R16B;FER;SOCS1;SESN2;FNIP1;NOP53;PUM3;FKTN	.
	Notch signaling pathway (GO:0007219)	22160	0.0527308	0.304289	0	0	1.99564	5.87229	CREBBP;JAG1;MAML1;SNAI1;EP300;NRARP;HES1;DLL1;MIB1	.
	3'-UTR-mediated mRNA stabilization (GO:0070935)	44304	0.0533838	0.304289	0	0	3.2276	9.45768	ZFP36;MAPKAPK2;YBX3;HNRNPA0	.
	cell migration involved in sprouting angiogenesis (GO:0002042)	44304	0.0533838	0.304289	0	0	3.2276	9.45768	NR4A1;EGR3;SRF;VEGFA	.
	cellular response to glucocorticoid stimulus (GO:0071385)	44304	0.0533838	0.304289	0	0	3.2276	9.45768	ZFP36;BCL2L11;KLF9;ZFP36L2	.
	endothelial cell proliferation (GO:0001935)	44304	0.0533838	0.304289	0	0	3.2276	9.45768	ERN1;PROK2;NRARP;CD34	.
	positive regulation of amyloid-beta formation (GO:1902004)	44304	0.0533838	0.304289	0	0	3.2276	9.45768	EFNA1;EPHA4;TNF;ABCG1	.
	positive regulation of interleukin-4 production (GO:0032753)	44304	0.0533838	0.304289	0	0	3.2276	9.45768	SLC7A5;IRF4;NLRP3;PRKCQ	.
	positive regulation of lymphocyte chemotaxis (GO:0140131)	44304	0.0533838	0.304289	0	0	3.2276	9.45768	CCL4;STK39;CCL3;XCL1	.
	positive regulation of mRNA splicing, via spliceosome (GO:0048026)	44304	0.0533838	0.304289	0	0	3.2276	9.45768	DAZAP1;RBMXL1;TRA2A;RBMX	.
	positive regulation of phosphoprotein phosphatase activity (GO:0032516)	44304	0.0533838	0.304289	0	0	3.2276	9.45768	PPP1R15A;PPP1R15B;HSP90AB1;ITGA1	.
	programmed necrotic cell death (GO:0097300)	44304	0.0533838	0.304289	0	0	3.2276	9.45768	CYLD;IPMK;PPIF;TICAM1	.
	protein localization to centrosome (GO:0071539)	44304	0.0533838	0.304289	0	0	3.2276	9.45768	STIL;C2CD3;SPAG5;GOLGB1	.
	regulation of adaptive immune response (GO:0002819)	44304	0.0533838	0.304289	0	0	3.2276	9.45768	IL4I1;IRF1;SAMSN1;SIRT1	.
	regulation of catabolic process (GO:0009894)	44304	0.0533838	0.304289	0	0	3.2276	9.45768	ODC1;CENATAC;MDM2;FAM83D	.
	regulation of oxidative stress-induced intrinsic apoptotic signaling pathway (GO:1902175)	44304	0.0533838	0.304289	0	0	3.2276	9.45768	SFPQ;SOD2;SIRT1;NFE2L2	.
	regulation of transcription by RNA polymerase I (GO:0006356)	44304	0.0533838	0.304289	0	0	3.2276	9.45768	EIF2AK3;WDR75;WDR43;ATF4	.
	angiogenesis involved in wound healing (GO:0060055)	44266	0.0542357	0.304289	0	0	4.23501	12.3426	SRF;CD34;VEGFA	.
	cardiac muscle cell membrane repolarization (GO:0099622)	44266	0.0542357	0.304289	0	0	4.23501	12.3426	KCNE1;ATP1A1;ATP1B1	.
	cellular response to UV-A (GO:0071492)	44266	0.0542357	0.304289	0	0	4.23501	12.3426	MMP2;TIMP1;MMP9	.
	inositol phosphate biosynthetic process (GO:0032958)	44266	0.0542357	0.304289	0	0	4.23501	12.3426	PPIP5K1;IPMK;IP6K2	.
	negative regulation of activated T cell proliferation (GO:0046007)	44266	0.0542357	0.304289	0	0	4.23501	12.3426	BTN2A2;CRTAM;RC3H1	.
	negative regulation of centrosome duplication (GO:0010826)	44266	0.0542357	0.304289	0	0	4.23501	12.3426	TMEM67;CENATAC;MDM1	.
	negative regulation of receptor signaling pathway via STAT (GO:1904893)	44266	0.0542357	0.304289	0	0	4.23501	12.3426	SOCS3;SOCS1;BCL3	.
	nuclear DNA replication (GO:0033260)	44266	0.0542357	0.304289	0	0	4.23501	12.3426	RPA4;DONSON;MCM6	.
	positive regulation of cytoplasmic transport (GO:1903651)	44266	0.0542357	0.304289	0	0	4.23501	12.3426	PRKN;MTMR2;EZR	.
	positive regulation of epidermal growth factor-activated receptor activity (GO:0045741)	44266	0.0542357	0.304289	0	0	4.23501	12.3426	AREG;EREG;HBEGF	.
	positive regulation of transcription from RNA polymerase II promoter in response to endoplasmic reticulum stress (GO:1990440)	44266	0.0542357	0.304289	0	0	4.23501	12.3426	DDIT3;ATF3;ATF4	.
	rDNA heterochromatin assembly (GO:0000183)	44266	0.0542357	0.304289	0	0	4.23501	12.3426	BEND3;H4-16;SIRT1	.
	regulation of cysteine-type endopeptidase activity involved in apoptotic signaling pathway (GO:2001267)	44266	0.0542357	0.304289	0	0	4.23501	12.3426	PRR7;PLAUR;MMP9	.
	response to sterol (GO:0036314)	44266	0.0542357	0.304289	0	0	4.23501	12.3426	INSIG1;CCL3;RORA	.
	sphingomyelin metabolic process (GO:0006684)	44266	0.0542357	0.304289	0	0	4.23501	12.3426	SMPD2;SAMD8;SGMS1	.
	negative regulation of extrinsic apoptotic signaling pathway via death domain receptors (GO:1902042)	12571	0.0542559	0.304289	0	0	2.42184	7.05734	DDX3X;SERPINE1;TNFAIP3;TNFRSF10B;TNFRSF10A;ICAM1	.
	positive regulation of epidermal growth factor receptor signaling pathway (GO:0045742)	12571	0.0542559	0.304289	0	0	2.42184	7.05734	DGKD;PLAUR;AREG;MMP9;EREG;HBEGF	.
	positive regulation of protein dephosphorylation (GO:0035307)	12571	0.0542559	0.304289	0	0	2.42184	7.05734	PPP1R15A;PPP1R16B;PPP1R15B;HSP90AB1;DLC1;ITGA1	.
	positive regulation of telomerase activity (GO:0051973)	12571	0.0542559	0.304289	0	0	2.42184	7.05734	HSP90AB1;TNKS;CTNNB1;NAF1;PRKCQ;MAP3K4	.
	transcription by RNA polymerase I (GO:0006360)	12571	0.0542559	0.304289	0	0	2.42184	7.05734	TAF1D;CCNH;POLR1C;POLR1F;MNAT1;POLR1H	.
	histone lysine demethylation (GO:0070076)	44342	0.0556776	0.304289	0	0	2.6903	7.77006	KDM6B;KDM3A;KDM2A;JMJD1C;KDM6A	.
	mRNA polyadenylation (GO:0006378)	44342	0.0556776	0.304289	0	0	2.6903	7.77006	CLP1;PCF11;PAF1;TENT4B;WDR33	.
	negative regulation of signaling receptor activity (GO:2000272)	44342	0.0556776	0.304289	0	0	2.6903	7.77006	ERRFI1;GPRC5A;CBLB;TNF;SOCS4	.
	positive regulation of G1/S transition of mitotic cell cycle (GO:1900087)	44342	0.0556776	0.304289	0	0	2.6903	7.77006	MTBP;DDX3X;RGCC;CCND1;CDC6	.
	positive regulation of protein insertion into mitochondrial membrane involved in apoptotic signaling pathway (GO:1900740)	44342	0.0556776	0.304289	0	0	2.6903	7.77006	TFDP2;E2F1;TP53BP2;PMAIP1;YWHAG	.
	regulation of myelination (GO:0031641)	44342	0.0556776	0.304289	0	0	2.6903	7.77006	EGR2;EIF2AK3;TPPP;TNFRSF21;ZPR1	.
	regulation of potassium ion transmembrane transporter activity (GO:1901016)	44342	0.0556776	0.304289	0	0	2.6903	7.77006	KCNE1;AKAP9;STK39;ATP1B1;VAMP2	.
	regulation of protein insertion into mitochondrial membrane involved in apoptotic signaling pathway (GO:1900739)	44342	0.0556776	0.304289	0	0	2.6903	7.77006	TFDP2;E2F1;TP53BP2;PMAIP1;YWHAG	.
	RNA polyadenylation (GO:0043631)	44342	0.0556776	0.304289	0	0	2.6903	7.77006	CLP1;PCF11;PAF1;TENT4B;WDR33	.
	cellular response to starvation (GO:0009267)	19/158	0.0559566	0.304289	0	0	1.54792	4.46292	KLF10;HSPA8;GABARAPL1;XBP1;CDKN1A;EIF2AK3;CASTOR1;FOXO3;SIRT1;MAP1LC3A;SESN3;SIK1B;SESN2;ZC3H12A;PMAIP1;SIK1;DEPDC5;FNIP1;ATF4	.
	T cell receptor signaling pathway (GO:0050852)	19/158	0.0559566	0.304289	0	0	1.54792	4.46292	DENND1B;BTN2A2;RIPK2;PDE4D;RC3H1;PIK3R1;RC3H2;NFKB1;PIK3CA;ZC3H12A;PSME4;NFKBIZ;PDE4B;CTLA4;PRKCQ;NFKBID;HLA-DQA1;PAG1;TNFRSF21	.
	aggresome assembly (GO:0070842)	44232	0.0561583	0.304289	0	0	7.52633	21.6727	PRKN;BAG3	.
	auditory receptor cell morphogenesis (GO:0002093)	44232	0.0561583	0.304289	0	0	7.52633	21.6727	WHRN;PLS1	.
	auditory receptor cell stereocilium organization (GO:0060088)	44232	0.0561583	0.304289	0	0	7.52633	21.6727	WHRN;PLS1	.
	cellular response to antibiotic (GO:0071236)	44232	0.0561583	0.304289	0	0	7.52633	21.6727	MDM2;CRIP1	.
	cellular response to nicotine (GO:0071316)	44232	0.0561583	0.304289	0	0	7.52633	21.6727	TNF;NFKB1	.
	chemokine (C-X-C motif) ligand 12 signaling pathway (GO:0038146)	44232	0.0561583	0.304289	0	0	7.52633	21.6727	STK39;CXCR4	.
	chromatin maintenance (GO:0070827)	44232	0.0561583	0.304289	0	0	7.52633	21.6727	SUPV3L1;SIRT1	.
	chronic inflammatory response (GO:0002544)	44232	0.0561583	0.304289	0	0	7.52633	21.6727	THBS1;TNF	.
	deadenylation-independent decapping of nuclear-transcribed mRNA (GO:0031087)	44232	0.0561583	0.304289	0	0	7.52633	21.6727	DCP1A;PNRC2	.
	disaccharide biosynthetic process (GO:0046351)	44232	0.0561583	0.304289	0	0	7.52633	21.6727	B4GALT1;SLC2A1	.
	embryonic skeletal joint morphogenesis (GO:0060272)	44232	0.0561583	0.304289	0	0	7.52633	21.6727	OSR2;CTNNB1	.
	endothelial cell apoptotic process (GO:0072577)	44232	0.0561583	0.304289	0	0	7.52633	21.6727	IL10;HIPK1	.
	establishment of monopolar cell polarity (GO:0061162)	44232	0.0561583	0.304289	0	0	7.52633	21.6727	FSCN1;FOXJ1	.
	glucose import across plasma membrane (GO:0098708)	44232	0.0561583	0.304289	0	0	7.52633	21.6727	SLC2A1;SLC2A3	.
	hematopoietic stem cell migration (GO:0035701)	44232	0.0561583	0.304289	0	0	7.52633	21.6727	BCL11B;JAM3	.
	histone H3-K27 demethylation (GO:0071557)	44232	0.0561583	0.304289	0	0	7.52633	21.6727	KDM6B;KDM6A	.
	histone H4-K20 methylation (GO:0034770)	44232	0.0561583	0.304289	0	0	7.52633	21.6727	KMT5C;BEND3	.
	histone H4-K20 trimethylation (GO:0034773)	44232	0.0561583	0.304289	0	0	7.52633	21.6727	KMT5C;BEND3	.
	immature B cell differentiation (GO:0002327)	44232	0.0561583	0.304289	0	0	7.52633	21.6727	IRF2BP2;FNIP1	.
	mature ribosome assembly (GO:0042256)	44232	0.0561583	0.304289	0	0	7.52633	21.6727	DDX3X;SBDS	.
	mRNA cleavage (GO:0006379)	44232	0.0561583	0.304289	0	0	7.52633	21.6727	ERN1;PCF11	.
	negative regulation of cellular respiration (GO:1901856)	44232	0.0561583	0.304289	0	0	7.52633	21.6727	PDE12;PPIF	.
	negative regulation of CREB transcription factor activity (GO:0032792)	44232	0.0561583	0.304289	0	0	7.52633	21.6727	DDIT3;SIK1	.
	negative regulation of cysteine-type endopeptidase activity involved in apoptotic signaling pathway (GO:2001268)	44232	0.0561583	0.304289	0	0	7.52633	21.6727	PLAUR;MMP9	.
	negative regulation of hydrogen peroxide-induced neuron death (GO:1903208)	44232	0.0561583	0.304289	0	0	7.52633	21.6727	IL10;NR4A3	.
	negative regulation of metallopeptidase activity (GO:1905049)	44232	0.0561583	0.304289	0	0	7.52633	21.6727	TIMP3;TIMP1	.
	negative regulation of myelination (GO:0031642)	44232	0.0561583	0.304289	0	0	7.52633	21.6727	EIF2AK3;TNFRSF21	.
	negative regulation of oxidative stress-induced neuron intrinsic apoptotic signaling pathway (GO:1903377)	44232	0.0561583	0.304289	0	0	7.52633	21.6727	PRKN;HIF1A	.
	negative regulation of regulatory T cell differentiation (GO:0045590)	44232	0.0561583	0.304289	0	0	7.52633	21.6727	IRF1;CTLA4	.
	negative regulation of vitamin D biosynthetic process (GO:0010957)	44232	0.0561583	0.304289	0	0	7.52633	21.6727	SNAI1;NFKB1	.
	positive regulation of 3'-UTR-mediated mRNA stabilization (GO:1905870)	44232	0.0561583	0.304289	0	0	7.52633	21.6727	TENT4A;TENT4B	.
	positive regulation of basement membrane assembly involved in embryonic body morphogenesis (GO:1904261)	44232	0.0561583	0.304289	0	0	7.52633	21.6727	PHLDB1;CLASP1	.
	positive regulation of CD4-positive, alpha-beta T cell proliferation (GO:2000563)	44232	0.0561583	0.304289	0	0	7.52633	21.6727	XCL1;CD55	.
	positive regulation of feeding behavior (GO:2000253)	44232	0.0561583	0.304289	0	0	7.52633	21.6727	NR4A3;CFAP20	.
	positive regulation of MHC class I biosynthetic process (GO:0045345)	44232	0.0561583	0.304289	0	0	7.52633	21.6727	HSPH1;NLRC5	.
	positive regulation of mononuclear cell proliferation (GO:0032946)	44232	0.0561583	0.304289	0	0	7.52633	21.6727	CSF1;IL12A	.
	positive regulation of nucleotide-binding oligomerization domain containing signaling pathway (GO:0070426)	44232	0.0561583	0.304289	0	0	7.52633	21.6727	HSPA1B;HSPA1A	.
	positive regulation of prostaglandin biosynthetic process (GO:0031394)	44232	0.0561583	0.304289	0	0	7.52633	21.6727	IL1B;PTGS2	.
	positive regulation of protein neddylation (GO:2000436)	44232	0.0561583	0.304289	0	0	7.52633	21.6727	DCUN1D3;DCUN1D2	.
	positive regulation of T-helper 1 cell cytokine production (GO:2000556)	44232	0.0561583	0.304289	0	0	7.52633	21.6727	IL1B;XCL1	.
	pyrimidine nucleobase biosynthetic process (GO:0019856)	44232	0.0561583	0.304289	0	0	7.52633	21.6727	CTPS1;DHODH	.
	pyrimidine ribonucleotide metabolic process (GO:0009218)	44232	0.0561583	0.304289	0	0	7.52633	21.6727	ENTPD4;DHODH	.
	regulation of astrocyte activation (GO:0061888)	44232	0.0561583	0.304289	0	0	7.52633	21.6727	IL6;LDLR	.
	regulation of basement membrane assembly involved in embryonic body morphogenesis (GO:1904259)	44232	0.0561583	0.304289	0	0	7.52633	21.6727	PHLDB1;CLASP1	.
	regulation of chaperone-mediated protein folding (GO:1903644)	44232	0.0561583	0.304289	0	0	7.52633	21.6727	DNAJB2;SGTB	.
	regulation of guanyl-nucleotide exchange factor activity (GO:1905097)	44232	0.0561583	0.304289	0	0	7.52633	21.6727	STMN1;MET	.
	regulation of histone H4-K16 acetylation (GO:2000618)	44232	0.0561583	0.304289	0	0	7.52633	21.6727	AUTS2;SIRT1	.
	regulation of mononuclear cell proliferation (GO:0032944)	44232	0.0561583	0.304289	0	0	7.52633	21.6727	CSF1;IL12A	.
	regulation of receptor catabolic process (GO:2000644)	44232	0.0561583	0.304289	0	0	7.52633	21.6727	PTPN1;MTMR2	.
	regulation of T-helper 1 cell cytokine production (GO:2000554)	44232	0.0561583	0.304289	0	0	7.52633	21.6727	IL1B;XCL1	.
	regulation of type B pancreatic cell apoptotic process (GO:2000674)	44232	0.0561583	0.304289	0	0	7.52633	21.6727	TCF7L2;IL6	.
	response to denervation involved in regulation of muscle adaptation (GO:0014894)	44232	0.0561583	0.304289	0	0	7.52633	21.6727	HDAC4;FBXO32	.
	DNA synthesis involved in DNA repair (GO:0000731)	15888	0.0571034	0.307898	0	0	2.19799	6.29261	POLA1;UBB;UBC;ZBTB1;HROB;SIRT1;DTL	.
	negative regulation of proteolysis (GO:0045861)	15888	0.0571034	0.307898	0	0	2.19799	6.29261	IL10;EFNA1;EPHA4;SERPINE2;TIMP3;TIMP1;CLN8	.
	regulation of cytokine production involved in inflammatory response (GO:1900015)	15888	0.0571034	0.307898	0	0	2.19799	6.29261	PER1;IL6;ZC3H12A;TICAM1;HIF1A;TNF;APPL2	.
	regulation of purine nucleotide metabolic process (GO:1900542)	15888	0.0571034	0.307898	0	0	2.19799	6.29261	RANBP2;LACC1;EP300;NUP88;NUP153;HIF1A;OGT	.
	positive regulation of DNA biosynthetic process (GO:2000573)	22525	0.0575854	0.310118	0	0	1.95716	5.58668	HSP90AB1;RGCC;POLG2;TNKS;CTNNB1;NAF1;PRKCQ;MAP3K4;ATR	.
	positive regulation of signal transduction (GO:0009967)	28/252	0.0577418	0.310582	0	0	1.41685	4.04053	MAML1;GPS2;TNFAIP3;PIK3R1;TM2D3;HIF1A;DLL1;CDKN2AIP;DSTYK;EP300;WNT1;NKX3-1;CREBBP;XBP1;ZRANB1;MBD5;JAG1;HOMER1;SORBS1;F3;SIRT1;KLF2;ERN1;ASXL1;IL6;TRIM39;AXL;IL1B	.
	regulation of autophagy (GO:0010506)	26/231	0.0578323	0.310604	0	0	1.43729	4.09658	PRKN;USP13;USP36;MTMR8;MTMR9;SNX32;MTMR4;FOXO3;ATG101;ZC3H12A;TP53INP1;ABL1;EP300;ABL2;PIM2;MCL1;IL10;FZD5;EXOC8;PLK2;TICAM1;MID2;ERN1;DDIT3;DEPDC5;MET	.
	negative regulation of BMP signaling pathway (GO:0030514)	19207	0.057957	0.310604	0	0	2.05563	5.85456	SMURF2;SMURF1;BAMBI;WNT1;NBL1;SKIL;ACVR2B;SMAD7	.
	sprouting angiogenesis (GO:0002040)	19207	0.057957	0.310604	0	0	2.05563	5.85456	NR4A1;EGR3;SRF;NRARP;DLL1;THBS1;JMJD6;VEGFA	.
	protein autophosphorylation (GO:0046777)	19/159	0.0589141	0.315351	0	0	1.53677	4.35165	EPHA4;CDKL5;FLT1;STK39;EIF2AK3;LMTK2;ERN1;FER;MELK;MAK;STK17B;MAPKAPK2;ABL1;MAP3K21;PIM3;SIK1;PIM2;CDK12;ATR	.
	organelle assembly (GO:0070925)	44/425	0.0593229	0.317155	0	0	1.31078	3.70264	DDX6;DDX3X;TNKS;MIS12;PTPDC1;CENPC;IFT74;CFAP298;MAP1LC3A;ARL13B;ATG101;KIF3A;TCTN2;TMEM67;TP53INP2;CHMP1B;TP53INP1;CD34;CFAP20;FARP2;GABARAPL1;EXOC8;YTHDF3;DNAAF1;WDR19;VPS37C;RC3H1;FOXJ1;HAUS6;BBIP1;VPS37B;DYNLL2;TMEM231;SQLE;AHI1;CENPF;RILPL2;ATG16L1;MAK;TUBGCP5;WDPCP;B9D2;IFT46;GOLGA8A	.
	mRNA splicing, via spliceosome (GO:0000398)	30/274	0.0596175	0.318345	0	0	1.39383	3.93032	YTHDC1;EIF4A3;DDX20;CWC25;PNN;RBM4;POLR2A;CLP1;PCF11;PCBP2;TRA2A;SNIP1;SMN1;SRSF11;BCAS2;HNRNPA0;HSPA8;SF3A1;RBM15;WDR33;HNRNPL;SFPQ;DDX39A;SRSF2;STRAP;SRSF3;SRSF6;RBMX;SF1;SNRPB	.
	positive regulation of cellular process (GO:0048522)	62/625	0.0607589	0.323064	0	0	1.2515	3.50524	PRR7;CDKN1B;FLT1;HSP90AB1;DDX3X;CSF1;IRS2;AREG;TNF;CXCL16;ZFP36;HMGN5;FGF9;CCND1;NAMPT;ZC3H12A;ADNP2;PROK2;IL12A;TIMP1;IER5;NKX3-1;EPHA4;OSR2;CNOT6L;RIPK2;SPHK1;SIRT1;EREG;SUPV3L1;IL1B;MAP1A;HBEGF;HDAC4;SRF;DLL1;THBS1;CDKN2AIP;ACACA;BCLAF1;SERTAD1;LMNA;HES1;TPPP;WNT1;EGR2;XBP1;SPAG5;EGR4;OSM;CDC6;VEGFA;FOSL1;FER;IL6;BAMBI;CLCF1;MDM2;SPDYA;CEP43;SLC25A33;LGMN	.
	positive regulation of autophagy (GO:0010508)	33208	0.0609633	0.323064	0	0	1.74045	4.86888	PRKN;PLK3;SESN3;PLK2;SESN2;ZC3H12A;TP53INP1;PIM2;TICAM1;FOXO3;SIRT1;MID2	.
	positive regulation of binding (GO:0051099)	33208	0.0609633	0.323064	0	0	1.74045	4.86888	PRKN;TCF7L2;RIPK2;BAMBI;AMFR;GMNN;STMN1;PLAUR;HES1;MMP9;MET;CLN5	.
	protein complex oligomerization (GO:0051259)	33208	0.0609633	0.323064	0	0	1.74045	4.86888	MPP2;ARC;ALS2;MAT2A;HOMER1;ZC3H12A;NINJ1;ZBTB1;BEND3;G3BP2;RBMX;JMJD6	.
	regulation of glycolytic process (GO:0006110)	26207	0.0611274	0.323064	0	0	1.85401	5.18157	HDAC4;RANBP2;PFKFB3;PRXL2C;ZBTB20;EP300;NUP88;NUP153;HIF1A;OGT	.
	snRNA transcription (GO:0009301)	26207	0.0611274	0.323064	0	0	1.85401	5.18157	CCNK;USPL1;CCNT1;ELL;SNAPC1;POLR2A;TAF13;NABP1;INTS6;ELL2	.
	cellular response to virus (GO:0098586)	12936	0.0611598	0.323064	0	0	2.3382	6.53355	IL6;DDX3X;ZC3H12A;IL12A;HIF1A;GSDME	.
	positive regulation of cell cycle G1/S phase transition (GO:1902808)	12936	0.0611598	0.323064	0	0	2.3382	6.53355	DDX3X;RGCC;CCND1;STXBP4;PAF1;FAM83D	.
	smoothened signaling pathway (GO:0007224)	12936	0.0611598	0.323064	0	0	2.3382	6.53355	EVC2;STIL;ARL13B;TCTN2;HIPK1;TMEM231	.
	cellular response to organic cyclic compound (GO:0071407)	18/150	0.0625707	0.329449	0	0	1.54385	4.2787	KCNE1;TIPARP;INSIG1;NCOA3;RORA;ATP1A1;TFPI;TNF;NR4A3;PDE12;IL1B;ZC3H12A;AKAP9;NRIP1;CCL3;CTNNB1;EZR;NKX3-1	.
	double-strand break repair via nonhomologous end joining (GO:0006303)	22890	0.0627188	0.329449	0	0	1.92013	5.31701	H2AX;BARD1;BABAM2;UVRAG;POLA1;KDM2A;PAXIP1;NSD2;H4-16	.
	stress-activated MAPK cascade (GO:0051403)	22890	0.0627188	0.329449	0	0	1.92013	5.31701	PTGER4;ZFP36;UBB;RIPK2;UBC;GPS2;MAP3K8;MAP4K3;NFKB1	.
	mRNA stabilization (GO:0048255)	16254	0.0633452	0.329449	0	0	2.13847	5.90037	ZFP36;NOCT;MAPKAPK2;E2F1;YBX3;TENT5C;HNRNPA0	.
	histone deubiquitination (GO:0016578)	44305	0.0634167	0.329449	0	0	3.01227	8.30792	USP36;ATXN7;USP3;SUPT3H	.
	histone H4-K16 acetylation (GO:0043984)	44305	0.0634167	0.329449	0	0	3.01227	8.30792	KANSL2;JADE3;KAT7;OGT	.
	negative regulation of nervous system development (GO:0051961)	44305	0.0634167	0.329449	0	0	3.01227	8.30792	IL6;IL1B;TNF;APPL2	.
	NLS-bearing protein import into nucleus (GO:0006607)	44305	0.0634167	0.329449	0	0	3.01227	8.30792	RANBP2;CBLB;KPNA5;KPNA2	.
	regulation of centriole replication (GO:0046599)	44305	0.0634167	0.329449	0	0	3.01227	8.30792	STIL;PLK2;SPICE1;MDM1	.
	regulation of epithelial cell differentiation (GO:0030856)	44305	0.0634167	0.329449	0	0	3.01227	8.30792	KLF7;MAFG;MAFF;DLL1	.
	regulation of glucose transmembrane transport (GO:0010827)	44305	0.0634167	0.329449	0	0	3.01227	8.30792	NR4A3;IL1B;SLC2A1;BRAF	.
	regulation of mitotic spindle assembly (GO:1901673)	44305	0.0634167	0.329449	0	0	3.01227	8.30792	CHMP1B;CEP97;HSPA1B;HSPA1A	.
	regulation of T cell cytokine production (GO:0002724)	44305	0.0634167	0.329449	0	0	3.01227	8.30792	FZD5;XCL1;CD55;SMAD7	.
	activation of cysteine-type endopeptidase activity involved in apoptotic process (GO:0006919)	29891	0.0636027	0.329449	0	0	1.77742	4.89698	CASP9;DIABLO;DLC1;EIF2AK3;TNFRSF10B;CYCS;TNFRSF10A;IFT57;TNF;F3;NKX3-1	.
	negative regulation of cysteine-type endopeptidase activity (GO:2000117)	19572	0.063609	0.329449	0	0	2.00984	5.53712	DDX3X;SIAH2;FNIP1;TNF;THBS1;SH3RF1;CD44;VEGFA	.
	positive regulation of B cell activation (GO:0050871)	19572	0.063609	0.329449	0	0	2.00984	5.53712	XBP1;IL6;PAXIP1;TFRC;KMT5C;CLCF1;GPR183;IRS2	.
	negative regulation of endothelial cell apoptotic process (GO:2000352)	44343	0.0639351	0.329449	0	0	2.56787	7.06136	IL10;SERPINE1;TNFAIP3;ICAM1;NFE2L2	.
	negative regulation of insulin receptor signaling pathway (GO:0046627)	44343	0.0639351	0.329449	0	0	2.56787	7.06136	PTPN1;PTPRE;SOCS1;IL1B;PRKCQ	.
	positive regulation of nitric oxide biosynthetic process (GO:0045429)	44343	0.0639351	0.329449	0	0	2.56787	7.06136	HSP90AB1;IL1B;PTGS2;TNF;KLF2	.
	regulation of transcription elongation from RNA polymerase II promoter (GO:0034243)	44343	0.0639351	0.329449	0	0	2.56787	7.06136	HEXIM1;ELL;EAF1;CDK12;WDR43	.
	stress-activated protein kinase signaling cascade (GO:0031098)	44343	0.0639351	0.329449	0	0	2.56787	7.06136	UBB;UBC;KAT7;MAP3K8;NFKB1	.
	generation of neurons (GO:0048699)	23/202	0.0640503	0.329658	0	0	1.45549	3.99982	CDKL5;FZD5;AUTS2;RYK;CEP85L;POMGNT2;DLL1;RUNX2;SH3RF1;ARNTL;PER2;NR4A2;NGRN;TUBB2A;CDK6;IL1B;DDIT4;BHLHE40;ADNP2;CTNNB1;HES1;WNT1;MET	.
	ribosome biogenesis (GO:0042254)	22/192	0.065239	0.335385	0	0	1.46573	4.00099	DDX47;RPLP1;RPL22;RPLP0;WDR74;RPL36A;WDR75;NOLC1;RPL13A;TSC1;WDR43;RCL1;RPS17;RPS16;SBDS;RPL13;NAF1;RRP12;RPS2;ZNF622;RPL28;NOP53	.
	negative regulation of epithelial cell proliferation (GO:0050680)	26573	0.0660487	0.339153	0	0	1.82401	4.95648	DUSP10;CDK6;RGCC;KLF9;CASK;MCC;THBS1;MTSS1;NKX3-1;EREG	.
	adipose tissue development (GO:0060612)	44267	0.0680631	0.341908	0	0	3.76425	10.1157	XBP1;NAMPT;ARID5B	.
	cell cycle checkpoint signaling (GO:0000075)	44267	0.0680631	0.341908	0	0	3.76425	10.1157	WEE1;PLK2;NABP1	.
	cellular response to fluid shear stress (GO:0071498)	44267	0.0680631	0.341908	0	0	3.76425	10.1157	KLF2;MTSS1;NFE2L2	.
	dosage compensation by inactivation of X chromosome (GO:0009048)	44267	0.0680631	0.341908	0	0	3.76425	10.1157	RBM15;YTHDC1;RLIM	.
	exit from mitosis (GO:0010458)	44267	0.0680631	0.341908	0	0	3.76425	10.1157	UBE2C;UBE2S;CLASP1	.
	glomerular visceral epithelial cell differentiation (GO:0072112)	44267	0.0680631	0.341908	0	0	3.76425	10.1157	JAG1;BASP1;PROM1	.
	magnesium ion transport (GO:0015693)	44267	0.0680631	0.341908	0	0	3.76425	10.1157	NIPAL4;SLC41A1;CNNM4	.
	mitotic G1/S transition checkpoint signaling (GO:0044819)	44267	0.0680631	0.341908	0	0	3.76425	10.1157	PLK3;CCND1;SDE2	.
	negative regulation of production of miRNAs involved in gene silencing by miRNA (GO:1903799)	44267	0.0680631	0.341908	0	0	3.76425	10.1157	IL6;ZC3H12A;TNF	.
	nuclear body organization (GO:0030575)	44267	0.0680631	0.341908	0	0	3.76425	10.1157	DYRK3;USPL1;ZPR1	.
	positive regulation of T-helper 1 type immune response (GO:0002827)	44267	0.0680631	0.341908	0	0	3.76425	10.1157	IL23A;IL1B;XCL1	.
	positive regulation of ubiquitin protein ligase activity (GO:1904668)	44267	0.0680631	0.341908	0	0	3.76425	10.1157	CDC20;UBE2C;UBE2S	.
	protein auto-ADP-ribosylation (GO:0070213)	44267	0.0680631	0.341908	0	0	3.76425	10.1157	TIPARP;TNKS;PARP8	.
	regulation of CD4-positive, alpha-beta T cell differentiation (GO:0043370)	44267	0.0680631	0.341908	0	0	3.76425	10.1157	SOCS1;IRF4;SH3RF1	.
	regulation of MHC class II biosynthetic process (GO:0045346)	44267	0.0680631	0.341908	0	0	3.76425	10.1157	IL10;XBP1;SIRT1	.
	regulation of sister chromatid cohesion (GO:0007063)	44267	0.0680631	0.341908	0	0	3.76425	10.1157	FEN1;CDCA5;CTNNB1	.
	actin cytoskeleton reorganization (GO:0031532)	23255	0.0681339	0.341908	0	0	1.88447	5.0622	FARP2;PTPN1;FER;AUTS2;GAB1;CASS4;NEDD9;RICTOR;EZR	.
	monocarboxylic acid biosynthetic process (GO:0072330)	23255	0.0681339	0.341908	0	0	1.88447	5.0622	PER2;XBP1;LIPC;ACSM3;ALDH1A2;OSBP;SLC27A2;MCAT;ACACA	.
	organonitrogen compound catabolic process (GO:1901565)	23255	0.0681339	0.341908	0	0	1.88447	5.0622	IL4I1;SMPD2;LIPC;PNPLA8;CTH;SIAH1;ENPP2;CLN8;CLN5	.
	positive regulation of Ras protein signal transduction (GO:0046579)	23255	0.0681339	0.341908	0	0	1.88447	5.0622	NET1;P2RY10;ALS2;AUTS2;GPR35;IRS2;STK19;EPOR;GPR18	.
	rRNA metabolic process (GO:0016072)	19/162	0.0684333	0.342487	0	0	1.50429	4.03434	DDX47;RPLP1;RPL22;RPLP0;WDR74;RPL36A;WDR75;NOLC1;RPL13A;WDR43;RCL1;RPS17;RPS16;SBDS;RPL13;RRP12;RPS2;RPL28;NOP53	.
	positive regulation of telomere maintenance via telomere lengthening (GO:1904358)	13302	0.0685595	0.342487	0	0	2.26014	6.05728	TNKS;CTNNB1;NAF1;PRKCQ;MAP3K4;ATR	.
	regulation of cardiac muscle contraction (GO:0055117)	13302	0.0685595	0.342487	0	0	2.26014	6.05728	PDE4D;ZC3H12A;PDE4B;ATP1B1;ASB3;SMAD7	.
	regulation of osteoclast differentiation (GO:0045670)	13302	0.0685595	0.342487	0	0	2.26014	6.05728	MAFB;CSF1;IL23A;PRXL2A;CCL3;TNF	.
	positive regulation of leukocyte chemotaxis (GO:0002690)	19937	0.069592	0.34686	0	0	1.96604	5.23971	IL6;CSF1;SERPINE1;XCL1;IL12A;THBS1;VEGFA;LGMN	.
	regulation of proteolysis (GO:0030162)	19937	0.069592	0.34686	0	0	1.96604	5.23971	CYFIP2;SERPINE2;RNF139;TRAF3;PERP;PLAUR;CLN8;OGT	.
	Wnt signaling pathway (GO:0016055)	33939	0.0697565	0.346863	0	0	1.69675	4.51802	NR4A2;TCF7L2;ZRANB1;DDX3X;UBB;FZD5;RYK;UBC;CTNNB1;WNT1;CELSR2;CSNK1G1	.
	cellular response to radiation (GO:0071478)	16619	0.0699852	0.346863	0	0	2.08208	5.53723	NET1;CDKN1A;GADD45A;NSMCE3;RAD1;SIRT1;CLOCK	.
	positive regulation of chemotaxis (GO:0050921)	16619	0.0699852	0.346863	0	0	2.08208	5.53723	IL6;XCL1;THBS1;F3;MET;VEGFA;LGMN	.
	positive regulation of Notch signaling pathway (GO:0045747)	16619	0.0699852	0.346863	0	0	2.08208	5.53723	CREBBP;JAG1;MAML1;EP300;TM2D3;WNT1;DLL1	.
	regulation of receptor signaling pathway via JAK-STAT (GO:0046425)	16619	0.0699852	0.346863	0	0	2.08208	5.53723	IL10;SOCS3;IL6;SOCS1;BCL3;HES1;TNF	.
	mRNA processing (GO:0006397)	32/300	0.0705191	0.349117	0	0	1.35351	3.58933	CCNH;RNMT;YTHDC1;EIF4A3;CWC25;PNN;RBM4;POLR2A;CLP1;PCF11;PCBP2;TRA2A;SNIP1;SRSF11;BCAS2;HNRNPA0;HSPA8;SF3A1;RBM15;WDR33;HNRNPL;ERN1;SFPQ;DDX39A;SRSF2;SRSF3;SRSF6;MNAT1;PRMT9;RBMX;SF1;SNRPB	.
	chromatin assembly (GO:0031497)	26938	0.0712162	0.351779	0	0	1.79495	4.74233	H2AX;H2BC12;H2BC9;H2BC15;KAT6B;H4-16;PAF1;RSF1;SPTY2D1;SIRT1	.
	regulation of Rho protein signal transduction (GO:0035023)	26938	0.0712162	0.351779	0	0	1.79495	4.74233	NET1;P2RY10;GPR35;DLC1;STMN1;ABL1;ABL2;MET;ARHGAP35;GPR18	.
	cellular response to acid chemical (GO:0071229)	44344	0.0728406	0.357741	0	0	2.45609	6.43369	XBP1;SESN2;CPEB3;KLF2;VEGFA	.
	cellular response to epidermal growth factor stimulus (GO:0071364)	44344	0.0728406	0.357741	0	0	2.45609	6.43369	ZFP36;SYAP1;PDE8A;ZFP36L2;ZPR1	.
	positive regulation of microtubule polymerization (GO:0031116)	44344	0.0728406	0.357741	0	0	2.45609	6.43369	AKAP9;MET;CLASP1;HSPA1B;HSPA1A	.
	positive regulation of nitric oxide metabolic process (GO:1904407)	44344	0.0728406	0.357741	0	0	2.45609	6.43369	HSP90AB1;IL1B;PTGS2;TNF;KLF2	.
	regulation of immunoglobulin production (GO:0002637)	44344	0.0728406	0.357741	0	0	2.45609	6.43369	IL10;XBP1;IL6;CLCF1;DNAJB9	.
	positive regulation of cell differentiation (GO:0045597)	28/258	0.0729091	0.357741	0	0	1.37943	3.6121	BTG1;HSP90AB1;CSF1;SRF;SYAP1;ARNTL;RBM4;ZFP36;NOCT;ZC3H12A;ABL1;CD34;SPAG9;XBP1;PRKCH;MMD;SUCO;ACVR2B;RUNX2;NFKB1;GPRC5B;IL6;RGCC;BAMBI;IL1B;SNAI1;CTNNB1;NBL1	.
	protein catabolic process (GO:0030163)	23621	0.0738326	0.35871	0	0	1.8501	4.82128	PRKN;HSPA8;NEU4;SIAH2;SIAH1;PMAIP1;CLN8;MARCHF6;CLN5	.
	adaptive immune response based on somatic recombination of immune receptors built from immunoglobulin superfamily domains (GO:0002460)	44306	0.0743618	0.35871	0	0	2.82385	7.33865	JAG1;EBI3;GNL1;CD55	.
	cellular monovalent inorganic cation homeostasis (GO:0030004)	44306	0.0743618	0.35871	0	0	2.82385	7.33865	SLC12A2;LACC1;ATP1A1;ATP1B1	.
	dopaminergic neuron differentiation (GO:0071542)	44306	0.0743618	0.35871	0	0	2.82385	7.33865	NR4A2;RYK;CTNNB1;VEGFA	.
	lipopolysaccharide-mediated signaling pathway (GO:0031663)	44306	0.0743618	0.35871	0	0	2.82385	7.33865	IL1B;CCL3;TICAM1;TNF	.
	positive regulation of cyclin-dependent protein kinase activity (GO:1904031)	44306	0.0743618	0.35871	0	0	2.82385	7.33865	HSP90AB1;RGCC;CCND1;SPDYA	.
	positive regulation of G2/M transition of mitotic cell cycle (GO:0010971)	44306	0.0743618	0.35871	0	0	2.82385	7.33865	CCND1;CDK1;CDC25C;DTL	.
	positive regulation of natural killer cell mediated cytotoxicity (GO:0045954)	44306	0.0743618	0.35871	0	0	2.82385	7.33865	KLRK1;AP1G1;CRTAM;IL12A	.
	regulation of acute inflammatory response (GO:0002673)	44306	0.0743618	0.35871	0	0	2.82385	7.33865	IL6;OSM;NLRP3;PTGES	.
	regulation of fibroblast growth factor receptor signaling pathway (GO:0040036)	44306	0.0743618	0.35871	0	0	2.82385	7.33865	DSTYK;SPRY2;SPRY1;THBS1	.
	regulation of smooth muscle contraction (GO:0006940)	44306	0.0743618	0.35871	0	0	2.82385	7.33865	SPHK1;SRF;PROK2;ATP2B1	.
	positive regulation of peptidyl-serine phosphorylation (GO:0033138)	34304	0.0744459	0.35871	0	0	1.67571	4.35297	IL6;HSP90AB1;TFRC;RIPK2;AKAP9;OSM;SPRY2;BRAF;FNIP1;TNF;CD44;VEGFA	.
	regulation of cell adhesion (GO:0030155)	16/133	0.0744655	0.35871	0	0	1.5476	4.01976	EPHA4;CXCR4;CELSR2;TNF;DLL1;RND1;VEGFA;EFNA1;PLAU;RASA1;MYADM;ABL1;ABL2;IL12A;CYTIP;CYTH1	.
	transmembrane receptor protein serine/threonine kinase signaling pathway (GO:0007178)	16/133	0.0744655	0.35871	0	0	1.5476	4.01976	SMURF2;SMURF1;BMP8A;LRRC32;SIRT1;ACVR2B;RUNX2;SMAD7;ACVR1C;PARD6A;UBB;BAMBI;UBC;HIVEP1;RNF111;APPL2	.
	positive regulation of response to DNA damage stimulus (GO:2001022)	20302	0.0759074	0.35871	0	0	1.92411	4.96081	H2AX;BABAM2;BCLAF1;PMAIP1;SIRT1;HIC1;NKX3-1;ATR	.
	regulation of blood vessel endothelial cell migration (GO:0043535)	20302	0.0759074	0.35871	0	0	1.92411	4.96081	RGCC;GADD45A;AKT3;TNF;SIRT1;HIF1A;THBS1;VEGFA	.
	negative regulation of epithelial cell apoptotic process (GO:1904036)	13667	0.0764542	0.35871	0	0	2.18711	5.6232	IL10;TCF7L2;SERPINE1;TNFAIP3;ICAM1;NFE2L2	.
	regulation of microtubule cytoskeleton organization (GO:0070507)	13667	0.0764542	0.35871	0	0	2.18711	5.6232	CYLD;PHLDB1;STMN1;TRIM36;TPPP;CLASP1	.
	interleukin-12-mediated signaling pathway (GO:0035722)	16984	0.0770239	0.35871	0	0	2.02858	5.20055	HSPA9;IL10;CA1;SERPINB2;RPLP0;IL12A;SOD2	.
	positive regulation of nucleocytoplasmic transport (GO:0046824)	16984	0.0770239	0.35871	0	0	2.02858	5.20055	TCF7L2;BAG3;IL1B;ZC3H12A;PIK3R1;EMD;ZPR1	.
	positive regulation of response to stimulus (GO:0048584)	16984	0.0770239	0.35871	0	0	2.02858	5.20055	BCLAF1;ARG2;HOMER1;IER5;SIRT1;CDKN2AIP;NKX3-1	.
	vesicle organization (GO:0016050)	16984	0.0770239	0.35871	0	0	2.02858	5.20055	ARFGEF2;SAR1A;EXOC8;ALS2;WASL;CD34;PI4K2A	.
	lymphocyte differentiation (GO:0030098)	30987	0.0783745	0.35871	0	0	1.7041	4.33907	IL10;HDAC4;GPR89A;KLF6;AXL;CLCF1;GPS2;DNAJB9;KAT7;TOX;RELB	.
	regulation of tumor necrosis factor production (GO:0032680)	15/124	0.0791808	0.35871	0	0	1.55708	3.94878	ILRUN;IL10;ARFGEF2;ARG2;FZD5;TNFAIP3;THBS1;IL1A;ZFP36;IL6;IL23A;ZC3H12A;MAPKAPK2;CCL3;CD34	.
	cotranslational protein targeting to membrane (GO:0006613)	34669	0.0793322	0.35871	0	0	1.65519	4.19443	RPS17;RPS16;RPS18;RPLP1;RPS5;RPLP0;RPL22;RPL36A;RPL13A;RPL13;RPS2;RPL28	.
	interleukin-1-mediated signaling pathway (GO:0070498)	34669	0.0793322	0.35871	0	0	1.65519	4.19443	NFKBIA;IL1A;IL1RN;UBB;RIPK2;IL1R2;IL1B;PSME4;UBC;PELI1;MAP3K8;NFKB1	.
	nucleosome organization (GO:0034728)	34669	0.0793322	0.35871	0	0	1.65519	4.19443	H2AX;H2BC12;H2BC9;MCM3AP;H2BC15;SRCAP;NASP;KAT6B;H4-16;PAF1;RSF1;SPTY2D1	.
	regulation of insulin secretion (GO:0050796)	13/104	0.0796978	0.35871	0	0	1.61598	4.08765	PRKN;TCF7L2;MIDN;STXBP4;SLC2A1;BMP8A;IRS2;TNF;ARNTL;PER2;IL6;IL1B;CLOCK	.
	astrocyte development (GO:0014002)	44233	0.0797674	0.35871	0	0	5.64444	14.2728	CDK6;DLL1	.
	axo-dendritic transport (GO:0008088)	44233	0.0797674	0.35871	0	0	5.64444	14.2728	HSPA8;APBA1	.
	cellular heat acclimation (GO:0070370)	44233	0.0797674	0.35871	0	0	5.64444	14.2728	HSPA1B;HSPA1A	.
	cellular response to cold (GO:0070417)	44233	0.0797674	0.35871	0	0	5.64444	14.2728	NFKBIA;EIF2AK3	.
	cellular response to granulocyte macrophage colony-stimulating factor stimulus (GO:0097011)	44233	0.0797674	0.35871	0	0	5.64444	14.2728	ZFP36;ZFP36L2	.
	cellular triglyceride homeostasis (GO:0035356)	44233	0.0797674	0.35871	0	0	5.64444	14.2728	XBP1;SIRT1	.
	glomerular epithelial cell differentiation (GO:0072311)	44233	0.0797674	0.35871	0	0	5.64444	14.2728	BASP1;PROM1	.
	glycosylceramide metabolic process (GO:0006677)	44233	0.0797674	0.35871	0	0	5.64444	14.2728	GLA;ST6GALNAC6	.
	heat acclimation (GO:0010286)	44233	0.0797674	0.35871	0	0	5.64444	14.2728	HSPA1B;HSPA1A	.
	hexose import across plasma membrane (GO:0140271)	44233	0.0797674	0.35871	0	0	5.64444	14.2728	SLC2A1;SLC2A3	.
	histone H4-K12 acetylation (GO:0043983)	44233	0.0797674	0.35871	0	0	5.64444	14.2728	JADE3;KAT7	.
	inclusion body assembly (GO:0070841)	44233	0.0797674	0.35871	0	0	5.64444	14.2728	PRKN;BAG3	.
	L-ornithine transmembrane transport (GO:1903352)	44233	0.0797674	0.35871	0	0	5.64444	14.2728	SLC25A15;SLC7A1	.
	leucine transport (GO:0015820)	44233	0.0797674	0.35871	0	0	5.64444	14.2728	SLC7A5;SLC3A2	.
	magnesium ion homeostasis (GO:0010960)	44233	0.0797674	0.35871	0	0	5.64444	14.2728	SLC41A1;CNNM4	.
	mRNA 3'-splice site recognition (GO:0000389)	44233	0.0797674	0.35871	0	0	5.64444	14.2728	SF3A1;SF1	.
	negative regulation of blood vessel endothelial cell proliferation involved in sprouting angiogenesis (GO:1903588)	44233	0.0797674	0.35871	0	0	5.64444	14.2728	IL12A;THBS1	.
	negative regulation of fat cell proliferation (GO:0070345)	44233	0.0797674	0.35871	0	0	5.64444	14.2728	PER2;E2F1	.
	negative regulation of lens fiber cell differentiation (GO:1902747)	44233	0.0797674	0.35871	0	0	5.64444	14.2728	SPRY2;SPRY1	.
	negative regulation of relaxation of muscle (GO:1901078)	44233	0.0797674	0.35871	0	0	5.64444	14.2728	PDE4D;PDE4B	.
	negative regulation of T cell differentiation in thymus (GO:0033085)	44233	0.0797674	0.35871	0	0	5.64444	14.2728	FOXJ1;TMEM131L	.
	negative regulation of trophoblast cell migration (GO:1901164)	44233	0.0797674	0.35871	0	0	5.64444	14.2728	ACVR1C;TIMP1	.
	nucleotide transport (GO:0006862)	44233	0.0797674	0.35871	0	0	5.64444	14.2728	SLC25A33;SLC25A36	.
	oxygen homeostasis (GO:0032364)	44233	0.0797674	0.35871	0	0	5.64444	14.2728	SOD2;HIF1A	.
	photoreceptor cell outer segment organization (GO:0035845)	44233	0.0797674	0.35871	0	0	5.64444	14.2728	AHI1;TOPORS	.
	positive regulation of autophagosome maturation (GO:1901098)	44233	0.0797674	0.35871	0	0	5.64444	14.2728	FYCO1;UVRAG	.
	positive regulation of microglial cell migration (GO:1904141)	44233	0.0797674	0.35871	0	0	5.64444	14.2728	CSF1;CCL3	.
	positive regulation of natural killer cell mediated cytotoxicity directed against tumor cell target (GO:0002860)	44233	0.0797674	0.35871	0	0	5.64444	14.2728	CRTAM;IL12A	.
	positive regulation of natural killer cell mediated immune response to tumor cell (GO:0002857)	44233	0.0797674	0.35871	0	0	5.64444	14.2728	CRTAM;IL12A	.
	positive regulation of tau-protein kinase activity (GO:1902949)	44233	0.0797674	0.35871	0	0	5.64444	14.2728	HSP90AB1;NAB2	.
	positive regulation of toll-like receptor 7 signaling pathway (GO:0034157)	44233	0.0797674	0.35871	0	0	5.64444	14.2728	TASL;DDX3X	.
	protein deubiquitination involved in ubiquitin-dependent protein catabolic process (GO:0071947)	44233	0.0797674	0.35871	0	0	5.64444	14.2728	ZRANB1;TNFAIP3	.
	protein K27-linked ubiquitination (GO:0044314)	44233	0.0797674	0.35871	0	0	5.64444	14.2728	PRKN;UBE2S	.
	protein K29-linked ubiquitination (GO:0035519)	44233	0.0797674	0.35871	0	0	5.64444	14.2728	PRKN;UBE2S	.
	protein localization to non-motile cilium (GO:0097499)	44233	0.0797674	0.35871	0	0	5.64444	14.2728	ARL13B;BBIP1	.
	protein sulfation (GO:0006477)	44233	0.0797674	0.35871	0	0	5.64444	14.2728	TPST1;UST	.
	purine deoxyribonucleotide catabolic process (GO:0009155)	44233	0.0797674	0.35871	0	0	5.64444	14.2728	PNP;NUDT15	.
	purine nucleobase biosynthetic process (GO:0009113)	44233	0.0797674	0.35871	0	0	5.64444	14.2728	PRPS1;PAICS	.
	radial glial cell differentiation (GO:0060019)	44233	0.0797674	0.35871	0	0	5.64444	14.2728	HES1;GPR157	.
	regulation of 3'-UTR-mediated mRNA stabilization (GO:1905868)	44233	0.0797674	0.35871	0	0	5.64444	14.2728	TENT4A;TENT4B	.
	regulation of adipose tissue development (GO:1904177)	44233	0.0797674	0.35871	0	0	5.64444	14.2728	KLF7;SIRT1	.
	regulation of glucokinase activity (GO:0033131)	44233	0.0797674	0.35871	0	0	5.64444	14.2728	PRKN;MIDN	.
	regulation of interleukin-1-mediated signaling pathway (GO:2000659)	44233	0.0797674	0.35871	0	0	5.64444	14.2728	IL1RN;IL6	.
	regulation of long-chain fatty acid import across plasma membrane (GO:0010746)	44233	0.0797674	0.35871	0	0	5.64444	14.2728	IRS2;THBS1	.
	regulation of nitric oxide mediated signal transduction (GO:0010749)	44233	0.0797674	0.35871	0	0	5.64444	14.2728	THBS1;VEGFA	.
	regulation of nucleotide-binding oligomerization domain containing 2 signaling pathway (GO:0070432)	44233	0.0797674	0.35871	0	0	5.64444	14.2728	HSPA1B;HSPA1A	.
	regulation of pro-B cell differentiation (GO:2000973)	44233	0.0797674	0.35871	0	0	5.64444	14.2728	HES1;FNIP1	.
	regulation of relaxation of cardiac muscle (GO:1901897)	44233	0.0797674	0.35871	0	0	5.64444	14.2728	PDE4D;PDE4B	.
	regulation of T-helper cell differentiation (GO:0045622)	44233	0.0797674	0.35871	0	0	5.64444	14.2728	IRF4;RC3H1	.
	regulation of type B pancreatic cell proliferation (GO:0061469)	44233	0.0797674	0.35871	0	0	5.64444	14.2728	NR4A1;NR4A3	.
	renal filtration cell differentiation (GO:0061318)	44233	0.0797674	0.35871	0	0	5.64444	14.2728	BASP1;PROM1	.
	response to granulocyte macrophage colony-stimulating factor (GO:0097012)	44233	0.0797674	0.35871	0	0	5.64444	14.2728	ZFP36;ZFP36L2	.
	T-helper 17 cell lineage commitment (GO:0072540)	44233	0.0797674	0.35871	0	0	5.64444	14.2728	IL6;IRF4	.
	TORC2 signaling (GO:0038203)	44233	0.0797674	0.35871	0	0	5.64444	14.2728	SYAP1;RICTOR	.
	nucleic acid phosphodiester bond hydrolysis (GO:0090305)	27668	0.0822955	0.362801	0	0	1.73954	4.34438	ISG20;FEN1;UBB;PDE12;ZC3H12A;UBC;DXO;ERCC5;DCP1A;PNRC2	.
	positive regulation of lymphocyte proliferation (GO:0050671)	27668	0.0822955	0.362801	0	0	1.73954	4.34438	IL6;PNP;TFRC;IL23A;IL1B;CLCF1;GPR183;IRS2;IL12A;SLC7A1	.
	negative regulation of epithelial to mesenchymal transition (GO:0010719)	44345	0.0823854	0.362801	0	0	2.35363	5.87547	EFNA1;SPRY2;SPRY1;VASN;SMAD7	.
	negative regulation of transferase activity (GO:0051348)	44345	0.0823854	0.362801	0	0	2.35363	5.87547	ZFP36;CDKN1B;ABL1;IRS2;SMAD7	.
	nucleotide-excision repair, preincision complex assembly (GO:0006294)	44345	0.0823854	0.362801	0	0	2.35363	5.87547	UBB;CCNH;UBC;ERCC5;MNAT1	.
	positive regulation of viral genome replication (GO:0045070)	44345	0.0823854	0.362801	0	0	2.35363	5.87547	DDX3X;PDE12;PKN2;TMEM39A;ADARB1	.
	protein ADP-ribosylation (GO:0006471)	44345	0.0823854	0.362801	0	0	2.35363	5.87547	TNKS;TIPARP;ZC3HAV1;SIRT1;PARP8	.
	regulation of gluconeogenesis (GO:0006111)	44345	0.0823854	0.362801	0	0	2.35363	5.87547	CRY1;EP300;SIK1;SIRT1;OGT	.
	protein-containing complex disassembly (GO:0032984)	20668	0.0825557	0.362801	0	0	1.88392	4.69903	HSPA8;UVRAG;GABARAPL1;MAP1LC3A;FZD5;RUBCNL;CTNNB1;WNT1	.
	regulation of ATP metabolic process (GO:1903578)	20668	0.0825557	0.362801	0	0	1.88392	4.69903	RANBP2;BEND3;EP300;NUP88;NUP153;HIF1A;OGT;SLC25A33	.
	cardiac cell development (GO:0055006)	44268	0.0833062	0.362801	0	0	3.38764	8.41907	JAG1;TTN;VEGFA	.
	cellular potassium ion homeostasis (GO:0030007)	44268	0.0833062	0.362801	0	0	3.38764	8.41907	SLC12A2;ATP1A1;ATP1B1	.
	entry into host (GO:0044409)	44268	0.0833062	0.362801	0	0	3.38764	8.41907	CXCR4;CTNNB1;MET	.
	kinetochore organization (GO:0051383)	44268	0.0833062	0.362801	0	0	3.38764	8.41907	CENPF;MIS12;CENPC	.
	lymphocyte mediated immunity (GO:0002449)	44268	0.0833062	0.362801	0	0	3.38764	8.41907	JAG1;GNL1;CD55	.
	mature B cell differentiation involved in immune response (GO:0002313)	44268	0.0833062	0.362801	0	0	3.38764	8.41907	IL6;GPR183;DLL1	.
	mitochondrial outer membrane permeabilization (GO:0097345)	44268	0.0833062	0.362801	0	0	3.38764	8.41907	MOAP1;BCL2L11;PMAIP1	.
	negative regulation of cellular senescence (GO:2000773)	44268	0.0833062	0.362801	0	0	3.38764	8.41907	CDK6;AKT3;SIRT1	.
	negative regulation of gluconeogenesis (GO:0045721)	44268	0.0833062	0.362801	0	0	3.38764	8.41907	CRY1;EP300;SIK1	.
	negative regulation of macrophage derived foam cell differentiation (GO:0010745)	44268	0.0833062	0.362801	0	0	3.38764	8.41907	NFKBIA;NR1H2;ABCG1	.
	negative regulation of stem cell differentiation (GO:2000737)	44268	0.0833062	0.362801	0	0	3.38764	8.41907	JAG1;HES1;ZFP36L2	.
	polyamine metabolic process (GO:0006595)	44268	0.0833062	0.362801	0	0	3.38764	8.41907	AMD1;ODC1;SAT1	.
	positive regulation of cell aging (GO:0090343)	44268	0.0833062	0.362801	0	0	3.38764	8.41907	ARG2;LMNA;SIRT1	.
	positive regulation of ERAD pathway (GO:1904294)	44268	0.0833062	0.362801	0	0	3.38764	8.41907	USP13;HERPUD1;NFE2L2	.
	positive regulation of protein localization to cell surface (GO:2000010)	44268	0.0833062	0.362801	0	0	3.38764	8.41907	HSP90AB1;MAP1A;TNF	.
	regulation of antigen receptor-mediated signaling pathway (GO:0050854)	44268	0.0833062	0.362801	0	0	3.38764	8.41907	ELF1;ELF2;RC3H1	.
	regulation of autophagosome maturation (GO:1901096)	44268	0.0833062	0.362801	0	0	3.38764	8.41907	UVRAG;FYCO1;TMEM39A	.
	regulation of cell aging (GO:0090342)	44268	0.0833062	0.362801	0	0	3.38764	8.41907	LMNA;WNT1;ARNTL	.
	regulation of fibrinolysis (GO:0051917)	44268	0.0833062	0.362801	0	0	3.38764	8.41907	THBD;SERPINE1;THBS1	.
	regulation of protein acetylation (GO:1901983)	44268	0.0833062	0.362801	0	0	3.38764	8.41907	DDX3X;SIRT1;ARNTL	.
	regulation of response to stress (GO:0080134)	44268	0.0833062	0.362801	0	0	3.38764	8.41907	IL10;DYRK3;SLC38A2	.
	transport along microtubule (GO:0010970)	44268	0.0833062	0.362801	0	0	3.38764	8.41907	BAG3;APBA1;BORCS5	.
	RNA splicing, via transesterification reactions with bulged adenosine as nucleophile (GO:0000377)	27/251	0.0836764	0.363607	0	0	1.36539	3.38727	YTHDC1;EIF4A3;CWC25;PNN;RBM4;POLR2A;CLP1;PCF11;PCBP2;TRA2A;SNIP1;SRSF11;BCAS2;HNRNPA0;HSPA8;SF3A1;RBM15;WDR33;HNRNPL;SFPQ;DDX39A;SRSF2;SRSF3;SRSF6;RBMX;SF1;SNRPB	.
	negative regulation of defense response (GO:0031348)	31352	0.0837384	0.363607	0	0	1.68098	4.16893	IL10;ILRUN;PTGER4;TNFAIP6;FEM1A;PCBP2;TNFAIP3;GPS2;NLRP3;RORA;METRNL	.
	regulation of cell cycle G2/M phase transition (GO:1902749)	31352	0.0837384	0.363607	0	0	1.68098	4.16893	DYRK3;CENPF;TUBA1A;AKAP9;CDK1;HAUS6;TUBB4B;CEP43;YWHAG;TUBA4A;CLASP1	.
	glycosphingolipid metabolic process (GO:0006687)	17349	0.0844605	0.364862	0	0	1.97776	4.88797	SMPD2;UGT8;NEU4;CERK;NEU1;GLA;ST6GALNAC6	.
	positive regulation of cell-cell adhesion (GO:0022409)	17349	0.0844605	0.364862	0	0	1.97776	4.88797	IL10;AFDN;IL1B;PLAUR;TNF;CD44;SMAD7	.
	positive regulation of neuron death (GO:1901216)	17349	0.0844605	0.364862	0	0	1.97776	4.88797	DDIT3;DDIT4;CCL3;CTNNB1;FOXO3;TNF;ATF4	.
	regulation of protein localization to nucleus (GO:1900180)	17349	0.0844605	0.364862	0	0	1.97776	4.88797	ILRUN;TFRC;LIMK2;SESN2;EIF2AK3;CDK1;KAT7	.
	regulation of wound healing (GO:0061041)	17349	0.0844605	0.364862	0	0	1.97776	4.88797	TNFRSF12A;PLAU;SERPINE1;TNFAIP3;CASK;SRSF6;HBEGF	.
	positive regulation of cellular metabolic process (GO:0031325)	13/105	0.0845232	0.364862	0	0	1.59833	3.94904	STARD4;CDKN1A;CSF1;GADD45A;DCXR;NR1H2;THBS1;ACACA;VEGFA;NFKBIA;AHI1;ZC3H12A;CDK1	.
	DNA replication initiation (GO:0006270)	14032	0.0848402	0.36516	0	0	2.11865	5.22667	POLA1;ORC6;GMNN;RPA4;CDC6;MCM6	.
	negative regulation of proteasomal protein catabolic process (GO:1901799)	14032	0.0848402	0.36516	0	0	2.11865	5.22667	HSP90AB1;RYBP;TRIM39;MAP1A;NOP53;OGT	.
	negative regulation of ubiquitin-dependent protein catabolic process (GO:2000059)	14032	0.0848402	0.36516	0	0	2.11865	5.22667	HSP90AB1;RYBP;TRIM39;MAP1A;NOP53;OGT	.
	regulation of mRNA stability (GO:0043488)	17/146	0.085636	0.367749	0	0	1.49131	3.66511	HSPA8;YTHDF3;RC3H1;SAMD4B;TENT5C;RC3H2;ZFP36L2;ZFP36;UBB;PDE12;NOCT;MAPKAPK2;PSME4;UBC;E2F1;DCP1A;HSPA1A	.
	positive regulation of cell cycle (GO:0045787)	24351	0.0860851	0.367749	0	0	1.78499	4.37754	CDKN1B;RGCC;CCND1;SPHK1;MDM2;SPDYA;PKN2;NKX3-1;LGMN	.
	extrinsic apoptotic signaling pathway in absence of ligand (GO:0097192)	44307	0.0861911	0.367749	0	0	2.65759	6.51426	CASP9;MOAP1;BCL2A1;MCL1	.
	long-term synaptic potentiation (GO:0060291)	44307	0.0861911	0.367749	0	0	2.65759	6.51426	MPP2;ARC;PLK2;VAMP2	.
	positive regulation of glycolytic process (GO:0045821)	44307	0.0861911	0.367749	0	0	2.65759	6.51426	PFKFB3;PRXL2C;ZBTB20;HIF1A	.
	positive regulation of purine nucleotide metabolic process (GO:1900544)	44307	0.0861911	0.367749	0	0	2.65759	6.51426	PFKFB3;PRXL2C;ZBTB20;HIF1A	.
	regulation of anoikis (GO:2000209)	44307	0.0861911	0.367749	0	0	2.65759	6.51426	TLE1;PIK3CA;SIK1;MCL1	.
	regulation of ubiquitin protein ligase activity (GO:1904666)	44307	0.0861911	0.367749	0	0	2.65759	6.51426	CDC20;BAG2;UBE2C;UBE2S	.
	rRNA modification (GO:0000154)	44307	0.0861911	0.367749	0	0	2.65759	6.51426	NSUN4;BUD23;TFB1M;ZCCHC4	.
	phosphatidylinositol biosynthetic process (GO:0006661)	15/126	0.0880578	0.375271	0	0	1.52885	3.71475	MTMR2;PIGN;MTMR8;MTMR9;PIK3R1;MTMR4;SOCS3;SOCS1;PIK3CA;PIGA;PIP5K1B;PI4K2A;SOCS4;IP6K2;PIGH	.
	protein import into nucleus (GO:0006606)	28034	0.088209	0.375271	0	0	1.71309	4.15945	RPAIN;RANBP2;NXT1;FAM53C;CBLB;NUP88;NUP153;KPNA5;KPNA2;APPL2	.
	regulation of cell division (GO:0051302)	28034	0.088209	0.375271	0	0	1.71309	4.15945	PLK3;UVRAG;AHCTF1;ORC6;NCOA3;PLK2;KLHL21;DLL1;RAB11FIP4;NKX3-1	.
	regulation of protein-containing complex assembly (GO:0043254)	14/116	0.0889476	0.378049	0	0	1.55264	3.75693	HRK;FARP2;HSPA8;DDX3X;TFRC;SAR1A;HJURP;TNF;VEGFA;BCL2L11;EP300;TPPP;FNIP1;NOP53	.
	positive regulation of proteasomal protein catabolic process (GO:1901800)	31717	0.0893235	0.379281	0	0	1.65848	4.00603	PRKN;USP13;DNAJB2;BAG2;RNF19A;MDM2;ARIH1;NOP53;HSPA1B;SMAD7;HSPA1A	.
	positive regulation of proteolysis (GO:0045862)	21033	0.0895362	0.379819	0	0	1.84537	4.45309	CYFIP2;NDUFA13;BAG2;IL1B;PERP;ZC3H12A;TNF;OGT	.
	cellular response to interleukin-12 (GO:0071349)	17715	0.0922924	0.388872	0	0	1.92942	4.5974	HSPA9;IL10;CA1;SERPINB2;RPLP0;IL12A;SOD2	.
	Golgi to plasma membrane transport (GO:0006893)	17715	0.0922924	0.388872	0	0	1.92942	4.5974	ARFGEF2;GOLGA4;SYS1;EXOC8;EXOC6B;CCDC93;VAMP2	.
	negative regulation of MAP kinase activity (GO:0043407)	17715	0.0922924	0.388872	0	0	1.92942	4.5974	DNAJA1;PTPN1;DUSP10;IL1B;PAQR3;SPRY2;SPRY1	.
	regulation of interleukin-10 production (GO:0032653)	17715	0.0922924	0.388872	0	0	1.92942	4.5974	IL6;IL23A;IRF4;XCL1;DLL1;CD34;TNFRSF21	.
	RNA processing (GO:0006396)	20/179	0.0924235	0.388872	0	0	1.42375	3.39049	IVNS1ABP;RBM39;SF3A1;NUFIP1;DDX47;DDX20;ADARB1;TENT4A;TENT4B;HNRNPL;RBM4;SFPQ;CLP1;SRSF2;CDK12;PRMT9;BCAS2;SRSF11;SNRPB;HNRNPA0	.
	positive regulation of cell population proliferation (GO:0008284)	47/474	0.092468	0.388872	0	0	1.24848	2.9725	HDAC4;CDKN1A;FLT1;CSF1;C5AR1;IRS2;LAMC1;AREG;TNF;DLL1;THBS1;HMGN5;FGF9;SERTAD1;NAMPT;E2F1;PROK2;HES1;TIMP1;WNT1;NKX3-1;OSR2;TCF7L2;XBP1;PRKCH;CNOT6L;EGR4;SPHK1;OSM;SIRT1;EREG;VEGFA;FOSL1;FER;IL6;CDK6;NR4A3;BAMBI;CLCF1;IL1B;MDM2;SPDYA;TOX;CEP43;SLC25A33;LGMN;HBEGF	.
	histone H3-K4 methylation (GO:0051568)	44346	0.0925571	0.388872	0	0	2.25936	5.37712	PAXIP1;TET3;BEND3;OGT;KDM6A	.
	microtubule polymerization (GO:0046785)	44346	0.0925571	0.388872	0	0	2.25936	5.37712	AKAP9;TUBGCP5;TPPP;CLASP1;NDEL1	.
	negative regulation of cytoskeleton organization (GO:0051494)	44346	0.0925571	0.388872	0	0	2.25936	5.37712	PRKN;PIK3CA;MYADM;SSH2;CLASP1	.
	TRIF-dependent toll-like receptor signaling pathway (GO:0035666)	44346	0.0925571	0.388872	0	0	2.25936	5.37712	UBB;TRAF3;UBC;TICAM1;BIRC3	.
	transcription elongation from RNA polymerase II promoter (GO:0006368)	24716	0.0926389	0.388872	0	0	1.75412	4.17313	CCNK;CCNT1;ELL;POLR2A;CCNH;EAF1;PAF1;CDK12;MNAT1	.
	negative regulation of lymphocyte proliferation (GO:0050672)	14397	0.0937118	0.392257	0	0	2.05433	4.8637	IL10;IL4I1;SDC4;CTLA4;RC3H1;TNFRSF21	.
	protein monoubiquitination (GO:0006513)	14397	0.0937118	0.392257	0	0	2.05433	4.8637	PRKN;UBE2B;PAF1;DTL;KBTBD8;TOPORS	.
	regulation of T cell differentiation (GO:0045580)	14397	0.0937118	0.392257	0	0	2.05433	4.8637	XBP1;CRTAM;ZBTB1;ABL1;CTLA4;PRDM1	.
	positive regulation of intracellular protein transport (GO:0090316)	17/148	0.0942156	0.393993	0	0	1.46838	3.46855	PLK3;USP36;TCF7L2;SAR1A;FZD5;PIK3R1;TFDP2;BAG3;IL1B;ZC3H12A;TP53BP2;E2F1;PMAIP1;EMD;YWHAG;VAMP2;ZPR1	.
	positive regulation of phosphatidylinositol 3-kinase signaling (GO:0014068)	28399	0.0943718	0.394272	0	0	1.68742	3.98319	FLT1;PIK3CA;GAB1;OSM;IRS2;PIK3R1;TNF;SIRT1;EPOR;NKX3-1	.
	peptidyl-serine modification (GO:0018209)	19/169	0.0945551	0.394665	0	0	1.43354	3.3811	DYRK3;PRKCH;TNKS;PLK2;STK39;EIF2AK3;LMTK2;MASTL;HIPK1;RPS6KA2;AKT3;MAPKAPK2;CDK1;PRKCQ;RICTOR;PKN2;CLSPN;CSNK1G1;ATR	.
	natural killer cell mediated cytotoxicity (GO:0042267)	44308	0.0988695	0.404136	0	0	2.50981	5.80759	KLRK1;TUBB4B;ULBP2;VAMP2	.
	negative regulation of protein dephosphorylation (GO:0035308)	44308	0.0988695	0.404136	0	0	2.50981	5.80759	PPP1R15A;PPP1R16B;CRY2;MASTL	.
	positive regulation of amyloid precursor protein catabolic process (GO:1902993)	44308	0.0988695	0.404136	0	0	2.50981	5.80759	EFNA1;EPHA4;TNF;ABCG1	.
	negative regulation of response to external stimulus (GO:0032102)	14/118	0.0989427	0.404136	0	0	1.52261	3.52213	ILRUN;IL10;PTGER4;EPHA4;TNFAIP6;FEM1A;SERPINE1;CASK;TNFAIP3;GPS2;RORA;METRNL;PCBP2;NLRP3	.
	regulation of translational initiation (GO:0006446)	25082	0.0994765	0.404136	0	0	1.72429	3.97938	RBM4;PPP1R15B;DDX3X;EIF5;KLHL25;YTHDF3;EIF2AK3;ATF3;ATF4	.
	branching involved in blood vessel morphogenesis (GO:0001569)	44269	0.0998553	0.404136	0	0	3.0795	7.09528	CTNNB1;NRARP;VEGFA	.
	endothelial cell differentiation (GO:0045446)	44269	0.0998553	0.404136	0	0	3.0795	7.09528	KDM6B;JAG1;ACVR2B	.
	histone H3-K4 trimethylation (GO:0080182)	44269	0.0998553	0.404136	0	0	3.0795	7.09528	TET3;BEND3;OGT	.
	membrane repolarization during action potential (GO:0086011)	44269	0.0998553	0.404136	0	0	3.0795	7.09528	KCNE1;ATP1A1;ATP1B1	.
	negative regulation of fibroblast growth factor receptor signaling pathway (GO:0040037)	44269	0.0998553	0.404136	0	0	3.0795	7.09528	SPRY2;SPRY1;THBS1	.
	negative regulation of T cell differentiation (GO:0045581)	44269	0.0998553	0.404136	0	0	3.0795	7.09528	IRF1;FOXJ1;CTLA4	.
	negative regulation of T cell mediated immunity (GO:0002710)	44269	0.0998553	0.404136	0	0	3.0795	7.09528	IL4I1;XCL1;SMAD7	.
	negative regulation of viral transcription (GO:0032897)	44269	0.0998553	0.404136	0	0	3.0795	7.09528	HEXIM1;ZFP36;MID2	.
	pancreas development (GO:0031016)	44269	0.0998553	0.404136	0	0	3.0795	7.09528	TCF7L2;DNAAF1;MET	.
	positive regulation of glucose metabolic process (GO:0010907)	44269	0.0998553	0.404136	0	0	3.0795	7.09528	PMAIP1;IRS2;SIRT1	.
	positive regulation of glycogen biosynthetic process (GO:0045725)	44269	0.0998553	0.404136	0	0	3.0795	7.09528	EPM2AIP1;IRS2;SORBS1	.
	positive regulation of protein-containing complex disassembly (GO:0043243)	44269	0.0998553	0.404136	0	0	3.0795	7.09528	UVRAG;FYCO1;TNF	.
	positive regulation of T-helper cell differentiation (GO:0045624)	44269	0.0998553	0.404136	0	0	3.0795	7.09528	NFKBIZ;NLRP3;NFKBID	.
	positive regulation of transmembrane transport (GO:0034764)	44269	0.0998553	0.404136	0	0	3.0795	7.09528	NR4A3;BRAF;AZIN1	.
	regulation of IRE1-mediated unfolded protein response (GO:1903894)	44269	0.0998553	0.404136	0	0	3.0795	7.09528	PTPN1;BCL2L11;DNAJB9	.
	regulation of response to interferon-gamma (GO:0060330)	44269	0.0998553	0.404136	0	0	3.0795	7.09528	SOCS3;HSP90AB1;SOCS1	.
	T-helper cell differentiation (GO:0042093)	44269	0.0998553	0.404136	0	0	3.0795	7.09528	PTGER4;IL6;GPR183	.
	vascular endothelial growth factor signaling pathway (GO:0038084)	44269	0.0998553	0.404136	0	0	3.0795	7.09528	PIK3CA;GAB1;VEGFA	.
	mitotic cytokinesis (GO:0000281)	18080	0.100515	0.404136	0	0	1.88337	4.32695	RASA1;KIF4A;STMN1;CKAP2;TRIM36;MYH10;TTC19	.
	response to glucose (GO:0009749)	18080	0.100515	0.404136	0	0	1.88337	4.32695	ERN1;TCF7L2;XBP1;ZBTB20;IRS2;THBS1;VAMP2	.
	regulation of neuron apoptotic process (GO:0043523)	36130	0.100863	0.404136	0	0	1.57786	3.6196	PRKN;EGLN2;DDIT3;RASA1;CLCF1;CCL3;CTNNB1;FOXO3;SOD2;TNF;ATF4;LGMN	.
	lymphocyte migration (GO:0072676)	14763	0.103061	0.404136	0	0	1.9938	4.53079	CCL3L1;CCL20;CCL4;CRTAM;CCL3;XCL1	.
	negative regulation of cell-substrate adhesion (GO:0010812)	14763	0.103061	0.404136	0	0	1.9938	4.53079	JAG1;RASA1;CASK;MELTF;WNT1;THBS1	.
	negative regulation of protein kinase B signaling (GO:0051898)	14763	0.103061	0.404136	0	0	1.9938	4.53079	PHLPP2;PHLPP1;DDIT3;SIRT1;NOP53;OTUD3	.
	regulation of cytokine production (GO:0001817)	17/150	0.103321	0.404136	0	0	1.44614	3.28261	IL10;PTGER4;EOLA1;BTN2A2;CRTAM;ATP2B1;TNF;EREG;SCAMP5;POLA1;IL1A;PER1;IL6;RGCC;BCL6;TRAF3;MAPKAPK2	.
	MyD88-independent toll-like receptor signaling pathway (GO:0002756)	44347	0.103339	0.404136	0	0	2.17234	4.93065	UBB;TRAF3;UBC;TICAM1;BIRC3	.
	negative regulation of interleukin-6 production (GO:0032715)	44347	0.103339	0.404136	0	0	2.17234	4.93065	IL10;ZC3H12A;TNFAIP3;FOXJ1;TNF	.
	positive regulation of leukocyte cell-cell adhesion (GO:1903039)	44347	0.103339	0.404136	0	0	2.17234	4.93065	IL6;NR4A3;PRKCQ;TNF;CD44	.
	regulation of cellular senescence (GO:2000772)	44347	0.103339	0.404136	0	0	2.17234	4.93065	ARG2;CDK6;AKT3;SIRT1;ARNTL	.
	triglyceride homeostasis (GO:0070328)	44347	0.103339	0.404136	0	0	2.17234	4.93065	XBP1;LIPC;PNPLA8;RORA;SIRT1	.
	positive regulation of GTPase activity (GO:0043547)	23/214	0.104405	0.404136	0	0	1.36315	3.08	USP6NL;CDKL5;CCL3L1;CCL20;RALGAPA1;RGS16;SNX13;TBC1D9;FOXJ1;TSC1;ARHGAP24;TIAM2;NET1;AFDN;ARHGAP42;RALGAPB;ALS2;RGS1;CCL4;CCL3;XCL1;NDEL1;TBC1D16	.
	negative regulation of autophagy (GO:0010507)	21763	0.104486	0.404136	0	0	1.77281	4.00426	IL10;USP36;PIK3CA;MTMR8;MTMR9;TSC1;MET;MCL1	.
	astrocyte differentiation (GO:0048708)	44234	0.105793	0.404136	0	0	4.5153	10.1426	CDK6;DLL1	.
	cellular hypotonic response (GO:0071476)	44234	0.105793	0.404136	0	0	4.5153	10.1426	STK39;SLC12A6	.
	cellular response to laminar fluid shear stress (GO:0071499)	44234	0.105793	0.404136	0	0	4.5153	10.1426	KLF2;NFE2L2	.
	cellular response to platelet-derived growth factor stimulus (GO:0036120)	44234	0.105793	0.404136	0	0	4.5153	10.1426	HAS1;SYAP1	.
	chylomicron remnant clearance (GO:0034382)	44234	0.105793	0.404136	0	0	4.5153	10.1426	LIPC;LDLR	.
	definitive hemopoiesis (GO:0060216)	44234	0.105793	0.404136	0	0	4.5153	10.1426	HIPK1;ZFP36L2	.
	detection of muscle stretch (GO:0035995)	44234	0.105793	0.404136	0	0	4.5153	10.1426	CTNNB1;TTN	.
	ganglioside catabolic process (GO:0006689)	44234	0.105793	0.404136	0	0	4.5153	10.1426	NEU4;NEU1	.
	gas homeostasis (GO:0033483)	44234	0.105793	0.404136	0	0	4.5153	10.1426	SOD2;HIF1A	.
	glandular epithelial cell development (GO:0002068)	44234	0.105793	0.404136	0	0	4.5153	10.1426	CDK6;DLL1	.
	glomerular epithelial cell development (GO:0072310)	44234	0.105793	0.404136	0	0	4.5153	10.1426	JAG1;FOXJ1	.
	Golgi disassembly (GO:0090166)	44234	0.105793	0.404136	0	0	4.5153	10.1426	PLK3;CDK1	.
	hyaluronan biosynthetic process (GO:0030213)	44234	0.105793	0.404136	0	0	4.5153	10.1426	HAS1;IL1B	.
	left/right pattern formation (GO:0060972)	44234	0.105793	0.404136	0	0	4.5153	10.1426	AHI1;DNAAF1	.
	modulation by symbiont of host apoptotic process (GO:0052150)	44234	0.105793	0.404136	0	0	4.5153	10.1426	SFPQ;SERPINB9	.
	modulation by symbiont of host defense response (GO:0052031)	44234	0.105793	0.404136	0	0	4.5153	10.1426	UBB;UBC	.
	negative regulation of cell cycle phase transition (GO:1901988)	44234	0.105793	0.404136	0	0	4.5153	10.1426	RGCC;ZFP36L2	.
	negative regulation of cytoplasmic translation (GO:2000766)	44234	0.105793	0.404136	0	0	4.5153	10.1426	CPEB3;CPEB2	.
	negative regulation of epidermal cell differentiation (GO:0045605)	44234	0.105793	0.404136	0	0	4.5153	10.1426	SRSF6;DLL1	.
	negative regulation of meiotic nuclear division (GO:0045835)	44234	0.105793	0.404136	0	0	4.5153	10.1426	RAD1;TRIP13	.
	negative regulation of nervous system process (GO:0031645)	44234	0.105793	0.404136	0	0	4.5153	10.1426	EIF2AK3;TNFRSF21	.
	nucleobase biosynthetic process (GO:0046112)	44234	0.105793	0.404136	0	0	4.5153	10.1426	CTPS1;PAICS	.
	nucleotide-binding oligomerization domain containing 2 signaling pathway (GO:0070431)	44234	0.105793	0.404136	0	0	4.5153	10.1426	LACC1;RIPK2	.
	parallel actin filament bundle assembly (GO:0030046)	44234	0.105793	0.404136	0	0	4.5153	10.1426	FSCN1;SPIRE2	.
	polyamine biosynthetic process (GO:0006596)	44234	0.105793	0.404136	0	0	4.5153	10.1426	AMD1;SAT1	.
	positive regulation of aspartic-type endopeptidase activity involved in amyloid precursor protein catabolic process (GO:1902961)	44234	0.105793	0.404136	0	0	4.5153	10.1426	EFNA1;EPHA4	.
	positive regulation of B cell receptor signaling pathway (GO:0050861)	44234	0.105793	0.404136	0	0	4.5153	10.1426	PRKCH;SLC39A10	.
	positive regulation of ER-associated ubiquitin-dependent protein catabolic process (GO:1903071)	44234	0.105793	0.404136	0	0	4.5153	10.1426	HERPUD1;NFE2L2	.
	positive regulation of histone H3-K9 methylation (GO:0051574)	44234	0.105793	0.404136	0	0	4.5153	10.1426	JARID2;SIRT1	.
	positive regulation of histone H4 acetylation (GO:0090240)	44234	0.105793	0.404136	0	0	4.5153	10.1426	AUTS2;KAT7	.
	positive regulation of IRE1-mediated unfolded protein response (GO:1903896)	44234	0.105793	0.404136	0	0	4.5153	10.1426	PTPN1;BCL2L11	.
	positive regulation of lymphocyte apoptotic process (GO:0070230)	44234	0.105793	0.404136	0	0	4.5153	10.1426	IL10;FNIP1	.
	positive regulation of microtubule nucleation (GO:0090063)	44234	0.105793	0.404136	0	0	4.5153	10.1426	HSPA1B;HSPA1A	.
	positive regulation of miRNA metabolic process (GO:2000630)	44234	0.105793	0.404136	0	0	4.5153	10.1426	ZC3H12A;NFKB1	.
	positive regulation of pinocytosis (GO:0048549)	44234	0.105793	0.404136	0	0	4.5153	10.1426	AXL;APPL2	.
	positive regulation of podosome assembly (GO:0071803)	44234	0.105793	0.404136	0	0	4.5153	10.1426	FSCN1;TNF	.
	positive regulation of protein deubiquitination (GO:1903003)	44234	0.105793	0.404136	0	0	4.5153	10.1426	ZC3H12A;NOP53	.
	positive regulation of trophoblast cell migration (GO:1901165)	44234	0.105793	0.404136	0	0	4.5153	10.1426	SMURF2;VEGFA	.
	positive regulation of unsaturated fatty acid biosynthetic process (GO:2001280)	44234	0.105793	0.404136	0	0	4.5153	10.1426	IL1B;PTGS2	.
	positive regulation of vascular associated smooth muscle cell differentiation (GO:1905065)	44234	0.105793	0.404136	0	0	4.5153	10.1426	CTH;SOD2	.
	protein desumoylation (GO:0016926)	44234	0.105793	0.404136	0	0	4.5153	10.1426	USPL1;SENP2	.
	protein localization to cytoplasmic stress granule (GO:1903608)	44234	0.105793	0.404136	0	0	4.5153	10.1426	DDX3X;DCP1A	.
	purine-containing compound metabolic process (GO:0072521)	44234	0.105793	0.404136	0	0	4.5153	10.1426	PRPS1;GUK1	.
	pyrimidine ribonucleotide biosynthetic process (GO:0009220)	44234	0.105793	0.404136	0	0	4.5153	10.1426	CTPS1;DHODH	.
	regulation of fat cell proliferation (GO:0070344)	44234	0.105793	0.404136	0	0	4.5153	10.1426	PER2;E2F1	.
	regulation of glial cell apoptotic process (GO:0034350)	44234	0.105793	0.404136	0	0	4.5153	10.1426	PRKCH;DLL1	.
	regulation of lens fiber cell differentiation (GO:1902746)	44234	0.105793	0.404136	0	0	4.5153	10.1426	SPRY2;SPRY1	.
	regulation of MHC class I biosynthetic process (GO:0045343)	44234	0.105793	0.404136	0	0	4.5153	10.1426	HSPH1;NLRC5	.
	regulation of microglial cell migration (GO:1904139)	44234	0.105793	0.404136	0	0	4.5153	10.1426	CSF1;CCL3	.
	regulation of natural killer cell mediated cytotoxicity directed against tumor cell target (GO:0002858)	44234	0.105793	0.404136	0	0	4.5153	10.1426	CRTAM;IL12A	.
	regulation of toll-like receptor 7 signaling pathway (GO:0034155)	44234	0.105793	0.404136	0	0	4.5153	10.1426	TASL;DDX3X	.
	regulation of transforming growth factor beta activation (GO:1901388)	44234	0.105793	0.404136	0	0	4.5153	10.1426	HSP90AB1;LRRC32	.
	regulation of tubulin deacetylation (GO:0090043)	44234	0.105793	0.404136	0	0	4.5153	10.1426	EP300;TPPP	.
	response to host defenses (GO:0052200)	44234	0.105793	0.404136	0	0	4.5153	10.1426	UBB;UBC	.
	T-helper 17 cell differentiation (GO:0072539)	44234	0.105793	0.404136	0	0	4.5153	10.1426	IL6;IRF4	.
	TRAIL-activated apoptotic signaling pathway (GO:0036462)	44234	0.105793	0.404136	0	0	4.5153	10.1426	TNFRSF10B;TNFRSF10A	.
	type B pancreatic cell development (GO:0003323)	44234	0.105793	0.404136	0	0	4.5153	10.1426	CDK6;DLL1	.
	vascular associated smooth muscle cell development (GO:0097084)	44234	0.105793	0.404136	0	0	4.5153	10.1426	HES1;VEGFA	.
	vascular wound healing (GO:0061042)	44234	0.105793	0.404136	0	0	4.5153	10.1426	CD34;VEGFA	.
	white fat cell differentiation (GO:0050872)	44234	0.105793	0.404136	0	0	4.5153	10.1426	PER2;SIRT1	.
	zinc ion import across plasma membrane (GO:0071578)	44234	0.105793	0.404136	0	0	4.5153	10.1426	SLC39A10;SLC39A8	.
	cell chemotaxis (GO:0060326)	25447	0.106596	0.40615	0	0	1.69546	3.79565	NR4A1;EGR3;CCL20;CCRL2;CXCR5;CXCR4;PRKCQ;HBEGF;VEGFA	.
	DNA-templated transcription, elongation (GO:0006354)	25447	0.106596	0.40615	0	0	1.69546	3.79565	CCNK;CCNT1;ELL;POLR2A;CCNH;EAF1;PAF1;CDK12;MNAT1	.
	positive regulation of protein transport (GO:0051222)	25447	0.106596	0.40615	0	0	1.69546	3.79565	IL1A;PLK3;CNST;EZR;TNF;MYH10;ABCG1;VAMP2;TTN	.
	regulation of response to external stimulus (GO:0032101)	15/130	0.107635	0.409756	0	0	1.47535	3.28857	SPATA2;CXCR4;NR1D2;PTGS2;LRP8;CYLD;LACC1;BCL6;TRAF3;IRF1;XCL1;APPL2;CD55;PTGES;BIRC3	.
	negative regulation of ERK1 and ERK2 cascade (GO:0070373)	18445	0.109124	0.414353	0	0	1.83947	4.07493	DUSP4;PTPN1;DUSP10;TIMP3;SPRY2;SPRY1;EZR	.
	regulation of cellular component movement (GO:0051270)	18445	0.109124	0.414353	0	0	1.83947	4.07493	CDK6;ABL1;ABL2;PKN2;EREG;HBEGF;VEGFA	.
	regulation of generation of precursor metabolites and energy (GO:0043467)	18445	0.109124	0.414353	0	0	1.83947	4.07493	RANBP2;RUBCNL;EP300;NUP88;NUP153;HIF1A;OGT	.
	artery development (GO:0060840)	44309	0.112356	0.422973	0	0	2.37759	5.19761	HES1;ACVR2B;SMAD7;VEGFA	.
	blood vessel endothelial cell migration (GO:0043534)	44309	0.112356	0.422973	0	0	2.37759	5.19761	NR4A1;EGR3;SRF;VEGFA	.
	hyaluronan metabolic process (GO:0030212)	44309	0.112356	0.422973	0	0	2.37759	5.19761	CEMIP2;HAS1;IL1B;CD44	.
	mitotic cell cycle checkpoint signaling (GO:0007093)	44309	0.112356	0.422973	0	0	2.37759	5.19761	PLK3;WEE1;PLK2;NABP1	.
	negative regulation of phosphoprotein phosphatase activity (GO:0032515)	44309	0.112356	0.422973	0	0	2.37759	5.19761	PPP1R15A;CRY2;MASTL;TNF	.
	positive regulation of cholesterol efflux (GO:0010875)	44309	0.112356	0.422973	0	0	2.37759	5.19761	NFKBIA;NR1H2;GPS2;SIRT1	.
	positive regulation of natural killer cell mediated immunity (GO:0002717)	44309	0.112356	0.422973	0	0	2.37759	5.19761	KLRK1;AP1G1;CRTAM;IL12A	.
	positive regulation of transcription by RNA polymerase I (GO:0045943)	44309	0.112356	0.422973	0	0	2.37759	5.19761	EIF2AK3;WDR75;WDR43;ATF4	.
	regulation of supramolecular fiber organization (GO:1902903)	44309	0.112356	0.422973	0	0	2.37759	5.19761	HSPA8;PIK3CA;MAP1A;ABL1	.
	vesicle transport along microtubule (GO:0047496)	44309	0.112356	0.422973	0	0	2.37759	5.19761	FYCO1;KIF3A;KIFAP3;NDEL1	.
	response to organic cyclic compound (GO:0014070)	22129	0.112448	0.422973	0	0	1.73862	3.79935	TIPARP;IL1B;CCL3;PMAIP1;CTNNB1;TNF;NKX3-1;STRN3	.
	JNK cascade (GO:0007254)	15128	0.112876	0.423142	0	0	1.93673	4.22491	PTGER4;UBB;RIPK2;UBC;GPS2;MAP4K3	.
	protein methylation (GO:0006479)	15128	0.112876	0.423142	0	0	1.93673	4.22491	CSKMT;PRMT3;VCPKMT;ETF1;EEF1AKMT2;SNRPB	.
	regulation of mitochondrial membrane potential (GO:0051881)	15128	0.112876	0.423142	0	0	1.93673	4.22491	UBB;ABL1;PMAIP1;PYCR1;SLC25A33;SLC25A36	.
	regulation of viral transcription (GO:0046782)	15128	0.112876	0.423142	0	0	1.93673	4.22491	HEXIM1;ZFP36;CCNT1;POLR2A;RSF1;MID2	.
	snRNA transcription by RNA polymerase II (GO:0042795)	25812	0.113995	0.426045	0	0	1.66758	3.62132	CCNK;CCNT1;ELL;SNAPC1;POLR2A;TAF13;NABP1;INTS6;ELL2	.
	endodermal cell differentiation (GO:0035987)	11810	0.114712	0.426045	0	0	2.09177	4.52938	LAMB3;MMP2;COL6A1;PAF1;MMP9	.
	ERBB2 signaling pathway (GO:0038128)	11810	0.114712	0.426045	0	0	2.09177	4.52938	PIK3CA;GAB1;PIK3R1;EREG;HBEGF	.
	liver development (GO:0001889)	11810	0.114712	0.426045	0	0	2.09177	4.52938	XBP1;IL6;DNAAF1;ARID5B;MET	.
	mitochondrial membrane organization (GO:0007006)	11810	0.114712	0.426045	0	0	2.09177	4.52938	HSPA9;MTX3;PPIF;PMAIP1;SLC25A4	.
	modulation by host of symbiont process (GO:0051851)	11810	0.114712	0.426045	0	0	2.09177	4.52938	CCNT1;CCL4;CCL3;EP300;CHD1	.
	positive regulation of glucose transmembrane transport (GO:0010828)	11810	0.114712	0.426045	0	0	2.09177	4.52938	NR4A3;IRS2;BRAF;PIK3R1;SORBS1	.
	positive regulation of immune effector process (GO:0002699)	11810	0.114712	0.426045	0	0	2.09177	4.52938	IL10;XBP1;IL23A;IL1B;APPL2	.
	positive regulation of interleukin-10 production (GO:0032733)	11810	0.114712	0.426045	0	0	2.09177	4.52938	IL6;IL23A;IRF4;XCL1;CD34	.
	positive regulation of telomere maintenance (GO:0032206)	11810	0.114712	0.426045	0	0	2.09177	4.52938	TNKS;NAF1;PRKCQ;MAP3K4;GNL3	.
	regulation of cellular amide metabolic process (GO:0034248)	11810	0.114712	0.426045	0	0	2.09177	4.52938	SAMD8;NOLC1;TSC1;FOXO3;PUM3	.
	protein homooligomerization (GO:0051260)	14/121	0.115173	0.427399	0	0	1.47968	3.19806	MPP2;ZBTB1;SOD2;ACACA;JMJD6;ARC;ALS2;ALDH1A2;CTH;NINJ1;G3BP2;BEND3;RBMX;APPL2	.
	cardiac myofibril assembly (GO:0055003)	44270	0.117592	0.428453	0	0	2.82272	6.04214	NEBL;OBSL1;TTN	.
	cellular response to estrogen stimulus (GO:0071391)	44270	0.117592	0.428453	0	0	2.82272	6.04214	ARID5A;SRA1;SERPINB9	.
	cellular sodium ion homeostasis (GO:0006883)	44270	0.117592	0.428453	0	0	2.82272	6.04214	SLC12A2;ATP1A1;ATP1B1	.
	establishment of apical/basal cell polarity (GO:0035089)	44270	0.117592	0.428453	0	0	2.82272	6.04214	FSCN1;FOXJ1;EZR	.
	membrane repolarization during cardiac muscle cell action potential (GO:0086013)	44270	0.117592	0.428453	0	0	2.82272	6.04214	KCNE1;ATP1A1;ATP1B1	.
	negative regulation of mRNA processing (GO:0050686)	44270	0.117592	0.428453	0	0	2.82272	6.04214	BARD1;SRSF6;RBMX	.
	negative regulation of protein processing (GO:0010955)	44270	0.117592	0.428453	0	0	2.82272	6.04214	SERPINE2;SERPINE1;THBS1	.
	negative regulation of ubiquitin-protein transferase activity (GO:0051444)	44270	0.117592	0.428453	0	0	2.82272	6.04214	BAG2;ABL1;SMAD7	.
	photoreceptor cell development (GO:0042461)	44270	0.117592	0.428453	0	0	2.82272	6.04214	AHI1;TOPORS;VEGFA	.
	positive regulation of DNA damage response, signal transduction by p53 class mediator (GO:0043517)	44270	0.117592	0.428453	0	0	2.82272	6.04214	PMAIP1;HIC1;ATR	.
	positive regulation of endothelial cell chemotaxis (GO:2001028)	44270	0.117592	0.428453	0	0	2.82272	6.04214	MET;VEGFA;LGMN	.
	positive regulation of glycogen metabolic process (GO:0070875)	44270	0.117592	0.428453	0	0	2.82272	6.04214	EPM2AIP1;IRS2;SORBS1	.
	positive regulation of histone H3-K4 methylation (GO:0051571)	44270	0.117592	0.428453	0	0	2.82272	6.04214	PAXIP1;AUTS2;CTNNB1	.
	positive regulation of osteoclast differentiation (GO:0045672)	44270	0.117592	0.428453	0	0	2.82272	6.04214	CSF1;IL23A;TNF	.
	prostanoid biosynthetic process (GO:0046457)	44270	0.117592	0.428453	0	0	2.82272	6.04214	PNPLA8;PTGS2;PTGES	.
	regulation of cytoplasmic translation (GO:2000765)	44270	0.117592	0.428453	0	0	2.82272	6.04214	CPEB3;YBX3;CPEB2	.
	regulation of endothelial cell chemotaxis (GO:2001026)	44270	0.117592	0.428453	0	0	2.82272	6.04214	THBS1;MET;LGMN	.
	regulation of integrin activation (GO:0033623)	44270	0.117592	0.428453	0	0	2.82272	6.04214	FARP2;PTGER4;JAM3	.
	regulation of phospholipase C activity (GO:1900274)	44270	0.117592	0.428453	0	0	2.82272	6.04214	FLT1;ABL1;ABL2	.
	regulation of triglyceride biosynthetic process (GO:0010866)	44270	0.117592	0.428453	0	0	2.82272	6.04214	NR1H2;SIK1;LDLR	.
	response to muscle stretch (GO:0035994)	44270	0.117592	0.428453	0	0	2.82272	6.04214	PIK3CA;CTNNB1;TTN	.
	RNA phosphodiester bond hydrolysis, endonucleolytic (GO:0090502)	44270	0.117592	0.428453	0	0	2.82272	6.04214	ZC3H12D;ZC3H12C;ZC3H12A	.
	positive regulation of fat cell differentiation (GO:0045600)	18810	0.118111	0.429991	0	0	1.79757	3.83984	ZFP36;XBP1;NOCT;SYAP1;ZC3H12A;METRNL;PTGS2	.
	B cell differentiation (GO:0030183)	22494	0.120729	0.438437	0	0	1.70573	3.60626	IL10;HDAC4;KLF6;CLCF1;GPS2;DNAJB9;IRF2BP2;FNIP1	.
	positive regulation of interleukin-8 production (GO:0032757)	22494	0.120729	0.438437	0	0	1.70573	3.60626	IL6;DDIT3;IL1B;SERPINE1;TNF;F3;HSPA1B;HSPA1A	.
	regulation of endocytosis (GO:0030100)	22494	0.120729	0.438437	0	0	1.70573	3.60626	SCAMP5;PTPN1;MTMR2;SPHK1;RUFY2;ABL1;ABL2;DLL1	.
	nitrogen compound transport (GO:0071705)	16/143	0.120952	0.438884	0	0	1.42496	3.01003	ARRDC4;SLC12A2;ARRDC2;ARRDC3;SLC3A2;SLC7A1;SCAMP5;SLC7A5;CENPF;SLC6A8;KIF3A;CHMP1B;SLC38A2;SLC18A2;VAMP2;SLC19A2	.
	regulation of interleukin-8 production (GO:0032677)	29860	0.121493	0.440401	0	0	1.59201	3.3558	IL10;IL6;DDIT3;IL1B;SERPINE1;BCL3;TNF;F3;HSPA1B;HSPA1A	.
	myeloid leukocyte differentiation (GO:0002573)	26177	0.121669	0.440401	0	0	1.64059	3.45583	FARP2;CDKN1A;CSF1;GPR183;E2F1;EP300;MMP9;SIRT1;VEGFA	.
	regulation of G1/S transition of mitotic cell cycle (GO:2000045)	26177	0.121669	0.440401	0	0	1.64059	3.45583	CDKN1A;WEE1;DDX3X;CDK6;RGCC;CCND1;DCUN1D3;E2F1;APPL2	.
	negative regulation of cell migration (GO:0030336)	16/144	0.126373	0.452871	0	0	1.41375	2.92436	EPHA4;JAG1;SERPINE1;ADARB1;FOXO3;MCC;SMAD7;AFDN;DUSP10;ACVR1C;HAS1;DLC1;TP53INP1;TIMP1;SRGAP1;CLASP1	.
	cardiac muscle cell differentiation (GO:0055007)	44310	0.126603	0.452871	0	0	2.25858	4.66781	KDM6B;SIK1;TTN;VEGFA	.
	negative regulation of protein tyrosine kinase activity (GO:0061099)	44310	0.126603	0.452871	0	0	2.25858	4.66781	ERRFI1;GPRC5A;CBLB;SOCS4	.
	positive regulation of cell-substrate junction organization (GO:0150117)	44310	0.126603	0.452871	0	0	2.25858	4.66781	ABL1;TSC1;PIK3R1;VEGFA	.
	potassium ion homeostasis (GO:0055075)	44310	0.126603	0.452871	0	0	2.25858	4.66781	SLC12A2;ATP1A1;ATP1B1;SLC12A6	.
	protein insertion into mitochondrial membrane (GO:0051204)	44310	0.126603	0.452871	0	0	2.25858	4.66781	MOAP1;NDUFA13;BCL2L11;PMAIP1	.
	protein K48-linked deubiquitination (GO:0071108)	44310	0.126603	0.452871	0	0	2.25858	4.66781	USP37;TNFAIP3;YOD1;OTUD3	.
	purine nucleotide metabolic process (GO:0006163)	44310	0.126603	0.452871	0	0	2.25858	4.66781	PRPS1;PNP;GUK1;NUDT15	.
	purine ribonucleotide catabolic process (GO:0009154)	44310	0.126603	0.452871	0	0	2.25858	4.66781	PNP;ENTPD4;PDE4D;PRTFDC1	.
	regulation of cytokine production involved in immune response (GO:0002718)	44310	0.126603	0.452871	0	0	2.25858	4.66781	IL10;LACC1;SLC7A5;TNF	.
	actin filament bundle assembly (GO:0051017)	12175	0.126652	0.452871	0	0	2.01696	4.16766	CALD1;FSCN1;NEDD9;EZR;PLS1	.
	actin filament bundle organization (GO:0061572)	12175	0.126652	0.452871	0	0	2.01696	4.16766	CALD1;FSCN1;NEDD9;EZR;PLS1	.
	positive regulation of ATP metabolic process (GO:1903580)	12175	0.126652	0.452871	0	0	2.01696	4.16766	PFKFB3;PRXL2C;BEND3;ZBTB20;HIF1A	.
	positive regulation of cytokine production involved in immune response (GO:0002720)	12175	0.126652	0.452871	0	0	2.01696	4.16766	LACC1;SLC7A5;FZD5;XCL1;CD55	.
	regulation of cholesterol efflux (GO:0010874)	12175	0.126652	0.452871	0	0	2.01696	4.16766	NFKBIA;NR1H2;GPS2;SIRT1;TTC39B	.
	regulation of anatomical structure morphogenesis (GO:0022603)	14/123	0.126813	0.453078	0	0	1.45237	2.99921	EPHA4;PHLDB1;ZRANB1;RC3H1;TNFAIP3;DLL1;ARHGAP35;ARC;IL6;BCL6;PROK2;CTNNB1;PDZD8;CLASP1	.
	regulation of endothelial cell proliferation (GO:0001936)	33909	0.127454	0.453587	0	0	1.53512	3.16235	PPP1R16B;NR4A1;EGR3;RGCC;AKT3;NRARP;F3;SIRT1;HIF1A;THBS1;VEGFA	.
	regulation of peptidyl-tyrosine phosphorylation (GO:0050730)	33909	0.127454	0.453587	0	0	1.53512	3.16235	EFNA1;IL6;RIPK2;IL23A;ENPP2;ABL1;OSM;LRP8;SAMSN1;CD44;VEGFA	.
	glycolipid metabolic process (GO:0006664)	19176	0.127469	0.453587	0	0	1.75753	3.62031	SMPD2;UGT8;NEU4;CERK;NEU1;GLA;ST6GALNAC6	.
	negative regulation of protein-containing complex assembly (GO:0031333)	19176	0.127469	0.453587	0	0	1.75753	3.62031	PTGER4;PPM1A;DDX3X;EP300;RPL13A;NOP53;JAM3	.
	regulation of telomere maintenance via telomerase (GO:0032210)	19176	0.127469	0.453587	0	0	1.75753	3.62031	TNKS;CTNNB1;NAF1;PRKCQ;TENT4B;MAP3K4;ATR	.
	negative regulation of supramolecular fiber organization (GO:1902904)	26543	0.129615	0.454697	0	0	1.61446	3.29865	PRKN;HSPA8;PIK3CA;ATXN7;STMN1;MYADM;SSH2;LDLR;CLASP1	.
	regulation of canonical Wnt signaling pathway (GO:0060828)	26/253	0.130205	0.454697	0	0	1.29642	2.64295	PRKN;DDX3X;TNKS;PPM1N;NRARP;TMEM131L;ARNTL;EMD;TLE3;TCF7L2;TLE1;SMURF2;UBE2B;SIAH2;AMFR;MCC;NFKB1;CYLD;PPM1A;GPRC5B;ZEB2;BAMBI;DDIT3;PSME4;CTNNB1;CSNK1G1	.
	actin filament reorganization (GO:0090527)	44235	0.133685	0.454697	0	0	3.76255	7.57125	CASS4;NEDD9	.
	adenosine to inosine editing (GO:0006382)	44235	0.133685	0.454697	0	0	3.76255	7.57125	ADARB1;ADAT2	.
	cardiac muscle hypertrophy (GO:0003300)	44235	0.133685	0.454697	0	0	3.76255	7.57125	HDAC4;TTN	.
	cell-cell adhesion mediated by cadherin (GO:0044331)	44235	0.133685	0.454697	0	0	3.76255	7.57125	AFDN;FER	.
	cellular response to hepatocyte growth factor stimulus (GO:0035729)	44235	0.133685	0.454697	0	0	3.76255	7.57125	APPL2;LGMN	.
	cellular response to interferon-alpha (GO:0035457)	44235	0.133685	0.454697	0	0	3.76255	7.57125	AXL;PDE12	.
	commissural neuron axon guidance (GO:0071679)	44235	0.133685	0.454697	0	0	3.76255	7.57125	RYK;VEGFA	.
	entry of bacterium into host cell (GO:0035635)	44235	0.133685	0.454697	0	0	3.76255	7.57125	CTNNB1;MET	.
	ER overload response (GO:0006983)	44235	0.133685	0.454697	0	0	3.76255	7.57125	DDIT3;EIF2AK3	.
	internal protein amino acid acetylation (GO:0006475)	44235	0.133685	0.454697	0	0	3.76255	7.57125	EP300;KAT7	.
	leukocyte aggregation (GO:0070486)	44235	0.133685	0.454697	0	0	3.76255	7.57125	IL1B;CD44	.
	macromolecule modification (GO:0043412)	44235	0.133685	0.454697	0	0	3.76255	7.57125	CHD1;ST3GAL1	.
	mitochondrial respiratory chain complex III assembly (GO:0034551)	44235	0.133685	0.454697	0	0	3.76255	7.57125	SLC25A33;TTC19	.
	myeloid leukocyte mediated immunity (GO:0002444)	44235	0.133685	0.454697	0	0	3.76255	7.57125	IL6;SERPINB9	.
	negative regulation by symbiont of host apoptotic process (GO:0033668)	44235	0.133685	0.454697	0	0	3.76255	7.57125	SFPQ;SERPINB9	.
	negative regulation by symbiont of host programmed cell death (GO:0052041)	44235	0.133685	0.454697	0	0	3.76255	7.57125	SFPQ;SERPINB9	.
	negative regulation of B cell apoptotic process (GO:0002903)	44235	0.133685	0.454697	0	0	3.76255	7.57125	BCL6;IRS2	.
	negative regulation of cAMP-dependent protein kinase activity (GO:2000480)	44235	0.133685	0.454697	0	0	3.76255	7.57125	PRKAR2A;SIRT1	.
	negative regulation of glial cell apoptotic process (GO:0034351)	44235	0.133685	0.454697	0	0	3.76255	7.57125	PRKCH;DLL1	.
	negative regulation of keratinocyte proliferation (GO:0010839)	44235	0.133685	0.454697	0	0	3.76255	7.57125	KLF9;CASK	.
	negative regulation of long-term synaptic potentiation (GO:1900272)	44235	0.133685	0.454697	0	0	3.76255	7.57125	EPHA4;ABL1	.
	negative regulation of mitochondrial fusion (GO:0010637)	44235	0.133685	0.454697	0	0	3.76255	7.57125	PRKN;TFRC	.
	negative regulation of monooxygenase activity (GO:0032769)	44235	0.133685	0.454697	0	0	3.76255	7.57125	GLA;NFKB1	.
	negative regulation of muscle cell apoptotic process (GO:0010656)	44235	0.133685	0.454697	0	0	3.76255	7.57125	BAG3;ZC3H12A	.
	negative regulation of muscle cell differentiation (GO:0051148)	44235	0.133685	0.454697	0	0	3.76255	7.57125	FOXO4;EREG	.
	negative regulation of nitrogen compound metabolic process (GO:0051172)	44235	0.133685	0.454697	0	0	3.76255	7.57125	HSP90AB1;LDLR	.
	negative regulation of vascular associated smooth muscle cell differentiation (GO:1905064)	44235	0.133685	0.454697	0	0	3.76255	7.57125	FGF9;NFATC3	.
	peptidyl-lysine deacetylation (GO:0034983)	44235	0.133685	0.454697	0	0	3.76255	7.57125	HDAC4;SIRT1	.
	peptidyl-tyrosine dephosphorylation involved in inactivation of protein kinase activity (GO:1990264)	44235	0.133685	0.454697	0	0	3.76255	7.57125	PTPN1;DUSP10	.
	positive regulation of Arp2/3 complex-mediated actin nucleation (GO:2000601)	44235	0.133685	0.454697	0	0	3.76255	7.57125	NCKAP1;FCHSD2	.
	positive regulation of aspartic-type peptidase activity (GO:1905247)	44235	0.133685	0.454697	0	0	3.76255	7.57125	EFNA1;EPHA4	.
	positive regulation of cell migration by vascular endothelial growth factor signaling pathway (GO:0038089)	44235	0.133685	0.454697	0	0	3.76255	7.57125	GAB1;VEGFA	.
	positive regulation of early endosome to late endosome transport (GO:2000643)	44235	0.133685	0.454697	0	0	3.76255	7.57125	MTMR2;EZR	.
	positive regulation of glial cell migration (GO:1903977)	44235	0.133685	0.454697	0	0	3.76255	7.57125	CSF1;CCL3	.
	positive regulation of MHC class II biosynthetic process (GO:0045348)	44235	0.133685	0.454697	0	0	3.76255	7.57125	XBP1;SIRT1	.
	positive regulation of myeloid cell apoptotic process (GO:0033034)	44235	0.133685	0.454697	0	0	3.76255	7.57125	HCAR2;SIRT1	.
	positive regulation of vascular associated smooth muscle cell migration (GO:1904754)	44235	0.133685	0.454697	0	0	3.76255	7.57125	NR4A3;FGF9	.
	protein localization to microtubule cytoskeleton (GO:0072698)	44235	0.133685	0.454697	0	0	3.76255	7.57125	FAM83D;MID2	.
	purine ribonucleoside monophosphate catabolic process (GO:0009169)	44235	0.133685	0.454697	0	0	3.76255	7.57125	PNP;PRTFDC1	.
	regulation of CD4-positive, alpha-beta T cell activation (GO:2000514)	44235	0.133685	0.454697	0	0	3.76255	7.57125	CD55;SH3RF1	.
	regulation of chemokine (C-C motif) ligand 5 production (GO:0071649)	44235	0.133685	0.454697	0	0	3.76255	7.57125	IL10;DDX3X	.
	regulation of cytoplasmic translational elongation (GO:1900247)	44235	0.133685	0.454697	0	0	3.76255	7.57125	CPEB3;CPEB2	.
	regulation of establishment of protein localization to mitochondrion (GO:1903747)	44235	0.133685	0.454697	0	0	3.76255	7.57125	DNAJA1;PRKN	.
	regulation of metaphase/anaphase transition of cell cycle (GO:1902099)	44235	0.133685	0.454697	0	0	3.76255	7.57125	UBE2C;CDC6	.
	regulation of nitrogen compound metabolic process (GO:0051171)	44235	0.133685	0.454697	0	0	3.76255	7.57125	LDLR;TNF	.
	regulation of positive chemotaxis (GO:0050926)	44235	0.133685	0.454697	0	0	3.76255	7.57125	F3;VEGFA	.
	regulation of protein K63-linked ubiquitination (GO:1900044)	44235	0.133685	0.454697	0	0	3.76255	7.57125	DDX3X;GPS2	.
	respiratory chain complex III assembly (GO:0017062)	44235	0.133685	0.454697	0	0	3.76255	7.57125	SLC25A33;TTC19	.
	response to hepatocyte growth factor (GO:0035728)	44235	0.133685	0.454697	0	0	3.76255	7.57125	APPL2;LGMN	.
	self proteolysis (GO:0097264)	44235	0.133685	0.454697	0	0	3.76255	7.57125	ADGRV1;LGMN	.
	snRNA transcription by RNA polymerase III (GO:0042796)	44235	0.133685	0.454697	0	0	3.76255	7.57125	ELL;SNAPC1	.
	spermidine metabolic process (GO:0008216)	44235	0.133685	0.454697	0	0	3.76255	7.57125	AMD1;SAT1	.
	T-helper cell lineage commitment (GO:0002295)	44235	0.133685	0.454697	0	0	3.76255	7.57125	IL6;IRF4	.
	regulation of signal transduction by p53 class mediator (GO:1901796)	17/156	0.133784	0.454697	0	0	1.38326	2.78246	BARD1;HEXIM1;PLK3;TAF13;PRDM1;HIPK1;JMY;TP53INP1;TP53BP2;CDK1;MDM2;EP300;RICTOR;RAD1;NOP53;MAP2K6;ATR	.
	cellular glucose homeostasis (GO:0001678)	15858	0.133855	0.454697	0	0	1.83184	3.68383	ERN1;XBP1;ZBTB20;PIK3R1;HIF1A;SIRT1	.
	positive regulation of leukocyte mediated cytotoxicity (GO:0001912)	15858	0.133855	0.454697	0	0	1.83184	3.68383	KLRK1;AP1G1;IL23A;CRTAM;XCL1;IL12A	.
	regulation of carbohydrate catabolic process (GO:0043470)	15858	0.133855	0.454697	0	0	1.83184	3.68383	RANBP2;EP300;NUP88;NUP153;HIF1A;OGT	.
	cellular response to corticosteroid stimulus (GO:0071384)	44271	0.136392	0.456293	0	0	2.60545	5.19064	ZFP36;BCL2L11;ZFP36L2	.
	cellular response to sterol (GO:0036315)	44271	0.136392	0.456293	0	0	2.60545	5.19064	GRAMD1B;INSIG1;RORA	.
	ceramide catabolic process (GO:0046514)	44271	0.136392	0.456293	0	0	2.60545	5.19064	NEU4;NEU1;GLA	.
	membrane repolarization (GO:0086009)	44271	0.136392	0.456293	0	0	2.60545	5.19064	KCNE1;ATP1A1;ATP1B1	.
	N-terminal protein amino acid acetylation (GO:0006474)	44271	0.136392	0.456293	0	0	2.60545	5.19064	CREBBP;EP300;NAA35	.
	necroptotic process (GO:0070266)	44271	0.136392	0.456293	0	0	2.60545	5.19064	CYLD;IPMK;TICAM1	.
	negative regulation of anoikis (GO:2000811)	44271	0.136392	0.456293	0	0	2.60545	5.19064	TLE1;PIK3CA;MCL1	.
	negative regulation of immune effector process (GO:0002698)	44271	0.136392	0.456293	0	0	2.60545	5.19064	FER;RC3H1;CD55	.
	negative regulation of receptor signaling pathway via JAK-STAT (GO:0046426)	44271	0.136392	0.456293	0	0	2.60545	5.19064	SOCS3;SOCS1;BCL3	.
	neural tube development (GO:0021915)	44271	0.136392	0.456293	0	0	2.60545	5.19064	STIL;ARL13B;ALDH1A2	.
	neuron projection organization (GO:0106027)	44271	0.136392	0.456293	0	0	2.60545	5.19064	MAP1A;LGMN;PLS1	.
	polyol biosynthetic process (GO:0046173)	44271	0.136392	0.456293	0	0	2.60545	5.19064	PPIP5K1;IPMK;IP6K2	.
	positive regulation by host of viral transcription (GO:0043923)	44271	0.136392	0.456293	0	0	2.60545	5.19064	CCNT1;EP300;CHD1	.
	positive regulation of small molecule metabolic process (GO:0062013)	44271	0.136392	0.456293	0	0	2.60545	5.19064	PMAIP1;ADM;IRS2	.
	protein localization to microtubule organizing center (GO:1905508)	44271	0.136392	0.456293	0	0	2.60545	5.19064	STIL;C2CD3;SPAG5	.
	regulation of amyloid-beta clearance (GO:1900221)	44271	0.136392	0.456293	0	0	2.60545	5.19064	SRF;CYP51A1;TNF	.
	regulation of cellular carbohydrate metabolic process (GO:0010675)	44271	0.136392	0.456293	0	0	2.60545	5.19064	PRKN;RORA;SIRT1	.
	regulation of cholesterol storage (GO:0010885)	44271	0.136392	0.456293	0	0	2.60545	5.19064	NR1H2;ABCG1;TTC39B	.
	regulation of mitotic sister chromatid separation (GO:0010965)	44271	0.136392	0.456293	0	0	2.60545	5.19064	UBE2C;CDC6;ANAPC1	.
	regulation of oxidative phosphorylation (GO:0002082)	44271	0.136392	0.456293	0	0	2.60545	5.19064	PDE12;PPIF;SLC25A33	.
	positive regulation of plasma membrane bounded cell projection assembly (GO:0120034)	30590	0.136502	0.456317	0	0	1.54822	3.08315	NCKAP1;PIK3CA;AUTS2;FSCN1;WASL;PIK3R1;WNT1;ARHGAP35;TAPT1;NDEL1	.
	IRE1-mediated unfolded protein response (GO:0036498)	19541	0.137186	0.457564	0	0	1.71923	3.4151	TSPYL2;ERN1;XBP1;TATDN2;EDEM1;LMNA;DNAJB9	.
	positive regulation of macroautophagy (GO:0016239)	19541	0.137186	0.457564	0	0	1.71923	3.4151	FYCO1;UVRAG;SESN3;BAG3;SESN2;SIRT1;SLC25A4	.
	regulation of DNA replication (GO:0006275)	19541	0.137186	0.457564	0	0	1.71923	3.4151	TSPYL2;USP37;GMNN;KAT7;CDC6;EREG;ATR	.
	positive regulation of JNK cascade (GO:0046330)	26908	0.137827	0.459353	0	0	1.58915	3.14931	TRAF4;GADD45B;TRAF3;GADD45A;IL1B;TRAF1;ZNF622;SH3RF1;GADD45G	.
	cell-substrate junction assembly (GO:0007044)	12540	0.139134	0.461274	0	0	1.9473	3.84069	LAMB3;DLC1;TESK2;LAMC1;SORBS1	.
	cellular response to amino acid stimulus (GO:0071230)	12540	0.139134	0.461274	0	0	1.9473	3.84069	XBP1;SESN3;SESN2;CASTOR1;CPEB3	.
	epithelial tube morphogenesis (GO:0060562)	12540	0.139134	0.461274	0	0	1.9473	3.84069	CTNNB1;HES1;MET;MTSS1;NKX3-1	.
	positive regulation of mitochondrial outer membrane permeabilization involved in apoptotic signaling pathway (GO:1901030)	12540	0.139134	0.461274	0	0	1.9473	3.84069	TFDP2;E2F1;TP53BP2;PMAIP1;YWHAG	.
	regulation of activated T cell proliferation (GO:0046006)	12540	0.139134	0.461274	0	0	1.9473	3.84069	BTN2A2;IL23A;CRTAM;RC3H1;TNFSF9	.
	regulation of keratinocyte differentiation (GO:0045616)	12540	0.139134	0.461274	0	0	1.9473	3.84069	ERRFI1;ZFP36;PRKCH;NCOA3;SRSF6	.
	termination of RNA polymerase II transcription (GO:0006369)	12540	0.139134	0.461274	0	0	1.9473	3.84069	ZNF473;CLP1;PCF11;WDR33;SNRPB	.
	energy derivation by oxidation of organic compounds (GO:0015980)	44311	0.141562	0.466171	0	0	2.15092	4.20508	NR4A3;CYCS;COQ10B;COQ10A	.
	negative regulation of cell junction assembly (GO:1901889)	44311	0.141562	0.466171	0	0	2.15092	4.20508	DLC1;IL1B;THBS1;TNF	.
	negative regulation of cellular carbohydrate metabolic process (GO:0010677)	44311	0.141562	0.466171	0	0	2.15092	4.20508	HDAC4;CRY1;EP300;SIK1	.
	phosphatidylinositol dephosphorylation (GO:0046856)	44311	0.141562	0.466171	0	0	2.15092	4.20508	MTMR2;MTMR8;MTMR9;MTMR4	.
	receptor catabolic process (GO:0032801)	44311	0.141562	0.466171	0	0	2.15092	4.20508	MYLIP;UVRAG;SMURF1;LGMN	.
	regulation of myotube differentiation (GO:0010830)	44311	0.141562	0.466171	0	0	2.15092	4.20508	HDAC4;XBP1;MAML1;SIK1	.
	regulation of proteolysis involved in cellular protein catabolic process (GO:1903050)	44311	0.141562	0.466171	0	0	2.15092	4.20508	EFNA1;EPHA4;UBB;NUDT15	.
	response to dsRNA (GO:0043331)	44311	0.141562	0.466171	0	0	2.15092	4.20508	PDE12;PMAIP1;SLC3A2;TICAM1	.
	response to hexose (GO:0009746)	44311	0.141562	0.466171	0	0	2.15092	4.20508	TCF7L2;IRS2;THBS1;VAMP2	.
	ncRNA processing (GO:0034470)	21/201	0.142916	0.47028	0	0	1.31983	2.56773	DDX47;RPLP1;RPL22;RPLP0;WDR74;RPL36A;WDR75;NOLC1;RPL13A;WDR43;RCL1;RPS17;RPS16;RPP21;SBDS;RPL13;INTS6;RRP12;RPS2;RPL28;NOP53	.
	nuclear export (GO:0051168)	30956	0.144358	0.473965	0	0	1.52722	2.95587	NXF1;EGR2;DDX39A;SMURF1;EIF4A3;SRSF2;SRSF3;NUP153;SRSF6;SRSF11	.
	regulation of cytokinesis (GO:0032465)	30956	0.144358	0.473965	0	0	1.52722	2.95587	PLK3;UVRAG;AHCTF1;PLK2;CXCR5;KLHL21;PKN2;CDC6;MAP9;RAB11FIP4	.
	vascular transport (GO:0010232)	30956	0.144358	0.473965	0	0	1.52722	2.95587	SLC5A6;SLC12A2;SLC7A5;ATP8A1;TFRC;SLC2A1;SLC16A7;SLC2A3;SLC7A1;SLC38A2	.
	positive regulation of cell-matrix adhesion (GO:0001954)	16224	0.144989	0.47533	0	0	1.78354	3.44419	CDK6;CSF1;ABL1;TSC1;UTRN;VEGFA	.
	protein K63-linked ubiquitination (GO:0070534)	16224	0.144989	0.47533	0	0	1.78354	3.44419	PRKN;UBE2B;TRAF3;UBE2S;PELI1;TRAF1	.
	Fc receptor mediated stimulatory signaling pathway (GO:0002431)	27273	0.1463	0.478209	0	0	1.56462	3.00734	CYFIP2;NCKAP1;HSP90AB1;YES1;NR4A3;PIK3CA;ABL1;WASL;PIK3R1	.
	mitotic nuclear division (GO:0140014)	27273	0.1463	0.478209	0	0	1.56462	3.00734	KIF18A;SPAG5;UBE2C;UBE2S;MIS12;SPICE1;CLASP1;MAP9;NDEL1	.
	proteolysis involved in cellular protein catabolic process (GO:0051603)	27273	0.1463	0.478209	0	0	1.56462	3.00734	PRKN;ZRANB1;UBB;UBC;MDM2;TNFAIP3;PMAIP1;MARCHF6;LGMN	.
	regulation of stress fiber assembly (GO:0051492)	27273	0.1463	0.478209	0	0	1.56462	3.00734	PTGER4;RGCC;DLC1;STMN1;ABL1;TSC1;PIK3R1;MET;CLASP1	.
	regulation of megakaryocyte differentiation (GO:0045652)	19906	0.147254	0.480971	0	0	1.68256	3.2231	RBM15;NR4A3;PITHD1;H4-16;EP300;PRKCQ;THBS1	.
	regulation of cilium assembly (GO:1902017)	23590	0.147422	0.481165	0	0	1.61408	3.09009	USP6NL;CYLD;CDKL5;LIMK2;CEP97;ARHGAP35;TAPT1;TBC1D16	.
	sphingolipid metabolic process (GO:0006665)	13/116	0.149423	0.487336	0	0	1.42678	2.71226	SAMD8;CERK;PPM1L;SGMS1;SPHK1;CLN8;UGT8;SMPD2;NEU4;NEU1;ENPP2;GLA;ST6GALNAC6	.
	lung development (GO:0030324)	12905	0.15213	0.494339	0	0	1.88229	3.54438	ERRFI1;FGF9;DNAAF1;FOXJ1;VEGFA	.
	positive regulation of lymphocyte activation (GO:0051251)	12905	0.15213	0.494339	0	0	1.88229	3.54438	IL6;IL23A;IL12A;PRKCQ;TICAM1	.
	regulation of mitotic spindle organization (GO:0060236)	12905	0.15213	0.494339	0	0	1.88229	3.54438	CHMP1B;CEP97;MAP9;HSPA1B;HSPA1A	.
	regulation of muscle cell differentiation (GO:0051147)	12905	0.15213	0.494339	0	0	1.88229	3.54438	SPAG9;RBM4;SRF;ABL1;CTNNB1	.
	regulation of TORC1 signaling (GO:1903432)	12905	0.15213	0.494339	0	0	1.88229	3.54438	DYRK3;SESN3;SESN2;CASTOR1;DEPDC5	.
	protein localization to nucleus (GO:0034504)	12/106	0.153332	0.497512	0	0	1.44294	2.70573	RPAIN;NXT1;BCL3;LMNA;FAM53C;MDM2;PAF1;NUP88;NUP153;NOP53;APPL2;TOPORS	.
	regulation of cell cycle process (GO:0010564)	12/106	0.153332	0.497512	0	0	1.44294	2.70573	PLK3;UVRAG;AHCTF1;SPAG5;DCUN1D3;PLK2;KLHL21;CTNNB1;CDC25C;OBSL1;MAP9;RAB11FIP4	.
	positive regulation of T cell activation (GO:0050870)	27638	0.155028	0.500339	0	0	1.54082	2.87233	XBP1;IL6;PNP;TFRC;IL23A;IL1B;ZBTB1;PRKCQ;SLC7A1	.
	regulation of transcription from RNA polymerase II promoter in response to hypoxia (GO:0061418)	27638	0.155028	0.500339	0	0	1.54082	2.87233	CREBBP;EGLN2;UBB;PSME4;UBC;EP300;HIF1A;VEGFA;NFE2L2	.
	positive regulation of hydrolase activity (GO:0051345)	16/149	0.15554	0.500339	0	0	1.36023	2.53118	USP6NL;NDUFA13;CDKL5;CCL3L1;CCL20;RGS16;MTMR9;SNX13;NET1;AFDN;ALS2;RGS1;CCL4;CCL3;XCL1;NDEL1	.
	acyl-CoA biosynthetic process (GO:0071616)	44272	0.156129	0.500339	0	0	2.41921	4.49265	SCD;PPT2;ACACA	.
	DNA biosynthetic process (GO:0071897)	44272	0.156129	0.500339	0	0	2.41921	4.49265	POLA1;HROB;SIRT1	.
	negative regulation of ATP metabolic process (GO:1903579)	44272	0.156129	0.500339	0	0	2.41921	4.49265	HDAC4;PDE12;PPIF	.
	negative regulation of interleukin-10 production (GO:0032693)	44272	0.156129	0.500339	0	0	2.41921	4.49265	IL23A;DLL1;TNFRSF21	.
	negative regulation of peptidyl-threonine phosphorylation (GO:0010801)	44272	0.156129	0.500339	0	0	2.41921	4.49265	DDIT4;SPRY2;SMAD7	.
	positive regulation of cyclin-dependent protein serine/threonine kinase activity (GO:0045737)	44272	0.156129	0.500339	0	0	2.41921	4.49265	RGCC;CCND1;SPDYA	.
	positive regulation of telomere capping (GO:1904355)	44272	0.156129	0.500339	0	0	2.41921	4.49265	TNKS;PRKCQ;MAP3K4	.
	positive regulation of transcription of Notch receptor target (GO:0007221)	44272	0.156129	0.500339	0	0	2.41921	4.49265	CREBBP;MAML1;EP300	.
	preassembly of GPI anchor in ER membrane (GO:0016254)	44272	0.156129	0.500339	0	0	2.41921	4.49265	PIGN;PIGA;PIGH	.
	regulation of cell killing (GO:0031341)	44272	0.156129	0.500339	0	0	2.41921	4.49265	IL10;CD55;ICAM1	.
	regulation of establishment of endothelial barrier (GO:1903140)	44272	0.156129	0.500339	0	0	2.41921	4.49265	IL1B;TNF;VEGFA	.
	snRNA metabolic process (GO:0016073)	44272	0.156129	0.500339	0	0	2.41921	4.49265	MEPCE;INTS6;RBM7	.
	stem cell development (GO:0048864)	44272	0.156129	0.500339	0	0	2.41921	4.49265	NOLC1;KBTBD8;TAPT1	.
	vasculature development (GO:0001944)	44272	0.156129	0.500339	0	0	2.41921	4.49265	ERRFI1;PIK3CA;ACVR2B	.
	chromosome condensation (GO:0030261)	16589	0.156528	0.500427	0	0	1.73771	3.22263	CDCA5;H4-16;CDK1;NCAPG;TENT4A;TTN	.
	regulation of cellular catabolic process (GO:0031329)	23955	0.156911	0.500427	0	0	1.58568	2.9368	PRKN;USP13;DDIT3;ABL1;EP300;ABL2;DEPDC5;MTMR4	.
	cellular response to drug (GO:0035690)	44312	0.157177	0.500427	0	0	2.05303	3.7989	TFRC;IL1B;PDE4B;NKX3-1	.
	negative regulation of cell development (GO:0010721)	44312	0.157177	0.500427	0	0	2.05303	3.7989	IL6;IL1B;TNF;APPL2	.
	negative regulation of macroautophagy (GO:0016242)	44312	0.157177	0.500427	0	0	2.05303	3.7989	USP36;PIK3CA;TSC1;TMEM39A	.
	negative regulation of proteolysis involved in cellular protein catabolic process (GO:1903051)	44312	0.157177	0.500427	0	0	2.05303	3.7989	EFNA1;EPHA4;HSP90AB1;TRIM39	.
	purine-containing compound biosynthetic process (GO:0072522)	44312	0.157177	0.500427	0	0	2.05303	3.7989	PRPS1;PNP;AMPD2;PAICS	.
	regulation of synapse organization (GO:0050807)	44312	0.157177	0.500427	0	0	2.05303	3.7989	EPHA4;CDKL5;ABL1;TNF	.
	TOR signaling (GO:0031929)	44312	0.157177	0.500427	0	0	2.05303	3.7989	SYAP1;RICTOR;FNIP1;RHEBL1	.
	positive regulation of I-kappaB kinase/NF-kappaB signaling (GO:0043123)	18/171	0.157467	0.500989	0	0	1.33041	2.45932	PRKN;GPR89A;TFRC;RIPK2;SLC20A1;PLK2;TNFRSF10B;DDX21;TICAM1;TNF;LITAF;MID2;PPM1A;GPRC5B;REL;PELI1;PIM2;BIRC3	.
	protein dephosphorylation (GO:0006470)	15/139	0.160469	0.501509	0	0	1.3676	2.50223	DUSP4;PPP1R15A;DUSP5;PPP1R15B;PTPN1;MTMR2;DUSP2;PPM1L;MTMR4;SSH2;DUSP8;DUSP16;PTPRE;PPM1A;DUSP10	.
	glucose homeostasis (GO:0042593)	31686	0.160745	0.501509	0	0	1.48687	2.7179	TCF7L2;KLF7;MBD5;IL6;CRY2;CRY1;PIK3R1;SIRT1;HIF1A;APPL2	.
	negative regulation of phosphorylation (GO:0042326)	31686	0.160745	0.501509	0	0	1.48687	2.7179	HDAC4;PRKN;PPP1R15B;CDKN1A;CDKN1B;ZC3H12A;PAQR3;MYADM;IRS2;SIRT1	.
	regulation of Ras protein signal transduction (GO:0046578)	31686	0.160745	0.501509	0	0	1.48687	2.7179	KBTBD6;DENND4A;DLC1;SPRY2;IRS2;STK19;SPRY1;OGT;RALGPS1;EPOR	.
	transport across blood-brain barrier (GO:0150104)	31686	0.160745	0.501509	0	0	1.48687	2.7179	SLC5A6;SLC12A2;SLC7A5;ATP8A1;TFRC;SLC2A1;SLC16A7;SLC2A3;SLC7A1;SLC38A2	.
	response to cytokine (GO:0034097)	16/150	0.161775	0.501509	0	0	1.35	2.4591	HDAC4;YTHDC2;SPHK1;SRF;CXCR4;CXCL16;KLHL20;RELB;ALDH1A2;IL1B;MAPKAPK2;REL;TIMP3;TIMP1;MAP4K3;MCL1	.
	associative learning (GO:0008306)	44236	0.162968	0.501509	0	0	3.22487	5.85056	MAP1A;LGMN	.
	ATF6-mediated unfolded protein response (GO:0036500)	44236	0.162968	0.501509	0	0	3.22487	5.85056	XBP1;DDIT3	.
	detection of mechanical stimulus involved in sensory perception of sound (GO:0050910)	44236	0.162968	0.501509	0	0	3.22487	5.85056	ADGRV1;WHRN	.
	epithelial cell apoptotic process (GO:1904019)	44236	0.162968	0.501509	0	0	3.22487	5.85056	IL10;HIPK1	.
	IMP metabolic process (GO:0046040)	44236	0.162968	0.501509	0	0	3.22487	5.85056	PNP;AMPD2	.
	mast cell mediated immunity (GO:0002448)	44236	0.162968	0.501509	0	0	3.22487	5.85056	NR4A3;SERPINB9	.
	negative regulation of bone resorption (GO:0045779)	44236	0.162968	0.501509	0	0	3.22487	5.85056	IL6;TNFAIP3	.
	negative regulation of mRNA 3'-end processing (GO:0031441)	44236	0.162968	0.501509	0	0	3.22487	5.85056	BARD1;CCNT1	.
	negative regulation of production of molecular mediator of immune response (GO:0002701)	44236	0.162968	0.501509	0	0	3.22487	5.85056	IL10;TNF	.
	negative regulation of protein activation cascade (GO:2000258)	44236	0.162968	0.501509	0	0	3.22487	5.85056	TFPI;F3	.
	negative regulation of protein-containing complex disassembly (GO:0043242)	44236	0.162968	0.501509	0	0	3.22487	5.85056	TMEM39A;TNF	.
	negative regulation of T cell cytokine production (GO:0002725)	44236	0.162968	0.501509	0	0	3.22487	5.85056	XCL1;SMAD7	.
	oligosaccharide catabolic process (GO:0009313)	44236	0.162968	0.501509	0	0	3.22487	5.85056	NEU4;NEU1	.
	phosphorylation of RNA polymerase II C-terminal domain (GO:0070816)	44236	0.162968	0.501509	0	0	3.22487	5.85056	CCNH;CDK12	.
	positive regulation of autophagy of mitochondrion (GO:1903599)	44236	0.162968	0.501509	0	0	3.22487	5.85056	PRKN;SLC25A4	.
	positive regulation of B cell differentiation (GO:0045579)	44236	0.162968	0.501509	0	0	3.22487	5.85056	IL10;XBP1	.
	positive regulation of blood vessel endothelial cell proliferation involved in sprouting angiogenesis (GO:1903589)	44236	0.162968	0.501509	0	0	3.22487	5.85056	PPP1R16B;VEGFA	.
	positive regulation of macrophage cytokine production (GO:0060907)	44236	0.162968	0.501509	0	0	3.22487	5.85056	GPRC5B;SIRT1	.
	positive regulation of protein kinase C signaling (GO:0090037)	44236	0.162968	0.501509	0	0	3.22487	5.85056	ADGRV1;VEGFA	.
	positive regulation of protein polyubiquitination (GO:1902916)	44236	0.162968	0.501509	0	0	3.22487	5.85056	PRKN;DDX3X	.
	positive regulation of smooth muscle cell apoptotic process (GO:0034393)	44236	0.162968	0.501509	0	0	3.22487	5.85056	IL12A;SOD2	.
	purine nucleobase metabolic process (GO:0006144)	44236	0.162968	0.501509	0	0	3.22487	5.85056	PRPS1;PAICS	.
	regulation of actin filament organization (GO:0110053)	44236	0.162968	0.501509	0	0	3.22487	5.85056	PIK3CA;ARHGAP35	.
	regulation of aspartic-type endopeptidase activity involved in amyloid precursor protein catabolic process (GO:1902959)	44236	0.162968	0.501509	0	0	3.22487	5.85056	EFNA1;EPHA4	.
	regulation of cellular extravasation (GO:0002691)	44236	0.162968	0.501509	0	0	3.22487	5.85056	ICAM1;JAM3	.
	regulation of complement-dependent cytotoxicity (GO:1903659)	44236	0.162968	0.501509	0	0	3.22487	5.85056	IL10;CD55	.
	regulation of DNA-templated transcription in response to stress (GO:0043620)	44236	0.162968	0.501509	0	0	3.22487	5.85056	BCLAF1;DDIT3	.
	regulation of endothelial cell development (GO:1901550)	44236	0.162968	0.501509	0	0	3.22487	5.85056	IL1B;TNF	.
	regulation of ER-associated ubiquitin-dependent protein catabolic process (GO:1903069)	44236	0.162968	0.501509	0	0	3.22487	5.85056	HERPUD1;NFE2L2	.
	regulation of lipid transport (GO:0032368)	44236	0.162968	0.501509	0	0	3.22487	5.85056	PRKN;NR1H2	.
	regulation of nephron tubule epithelial cell differentiation (GO:0072182)	44236	0.162968	0.501509	0	0	3.22487	5.85056	CTNNB1;PROM1	.
	regulation of pinocytosis (GO:0048548)	44236	0.162968	0.501509	0	0	3.22487	5.85056	AXL;NR1H2	.
	regulation of RNA polymerase II regulatory region sequence-specific DNA binding (GO:1903025)	44236	0.162968	0.501509	0	0	3.22487	5.85056	DDIT3;EP300	.
	regulation of skeletal muscle cell differentiation (GO:2001014)	44236	0.162968	0.501509	0	0	3.22487	5.85056	NR1D2;ARNTL	.
	regulation of smooth muscle cell apoptotic process (GO:0034391)	44236	0.162968	0.501509	0	0	3.22487	5.85056	IL12A;SIRT1	.
	regulation of T-helper 1 type immune response (GO:0002825)	44236	0.162968	0.501509	0	0	3.22487	5.85056	IL23A;XCL1	.
	regulation of tumor necrosis factor superfamily cytokine production (GO:1903555)	44236	0.162968	0.501509	0	0	3.22487	5.85056	ZFP36;MAPKAPK2	.
	regulation of vesicle fusion (GO:0031338)	44236	0.162968	0.501509	0	0	3.22487	5.85056	RAB3A;SPHK1	.
	response to magnesium ion (GO:0032026)	44236	0.162968	0.501509	0	0	3.22487	5.85056	SLC41A1;THBS1	.
	type B pancreatic cell differentiation (GO:0003309)	44236	0.162968	0.501509	0	0	3.22487	5.85056	CDK6;DLL1	.
	unsaturated fatty acid biosynthetic process (GO:0006636)	44236	0.162968	0.501509	0	0	3.22487	5.85056	FADS3;SCD	.
	negative regulation of macromolecule metabolic process (GO:0010605)	20/194	0.163779	0.503655	0	0	1.29994	2.35191	PRKN;MTMR2;HSP90AB1;TIPARP;SFMBT2;HIF1A;SIRT1;TNF;NFKB1;VEGFA;SLC7A5;NOCT;ZC3H12A;REL;MYADM;CCL3;CD34;LDLR;LGMN;NKX3-1	.
	positive regulation of growth (GO:0045927)	28004	0.164004	0.503994	0	0	1.51774	2.74388	SUPV3L1;DDX3X;SPHK1;ADNP2;CEP43;SLC25A33;CDKN2AIP;CXCL16;ZPR1	.
	glycosaminoglycan biosynthetic process (GO:0006024)	35735	0.165063	0.506462	0	0	1.44548	2.60392	HS3ST3B1;B4GALT1;SDC4;B3GNT7;IL1B;HAS1;CSGALNACT2;UST;XYLT1;ST3GAL1;B4GALT4	.
	positive regulation of cold-induced thermogenesis (GO:0120162)	35735	0.165063	0.506462	0	0	1.44548	2.60392	KDM6B;PER2;KDM3A;IRF4;SCD;CXCR4;G0S2;OGT;APPL2;GADD45G;VEGFA	.
	axonal transport (GO:0098930)	13271	0.165609	0.506462	0	0	1.82147	3.27523	AP3M2;KIF3A;KIF4A;KIF1B;HIF1A	.
	dendrite morphogenesis (GO:0048813)	13271	0.165609	0.506462	0	0	1.82147	3.27523	FARP1;KLF7;ARC;WASL;CELSR2	.
	establishment of protein localization to plasma membrane (GO:0061951)	13271	0.165609	0.506462	0	0	1.82147	3.27523	AFDN;GOLGA4;SYS1;RILPL2;VAMP2	.
	regulation of microtubule-based process (GO:0032886)	13271	0.165609	0.506462	0	0	1.82147	3.27523	CYLD;PHLDB1;TRIM36;TPPP;CLASP1	.
	regulation of mRNA processing (GO:0050684)	13271	0.165609	0.506462	0	0	1.82147	3.27523	RBM39;YTHDC1;SRSF3;JMJD6;SF1	.
	cellular component disassembly (GO:0022411)	24320	0.16668	0.508679	0	0	1.55825	2.7919	DYRK3;EXOC8;MMP2;MMP19;LAMC1;TIMP1;MMP9;CD44	.
	ERBB signaling pathway (GO:0038127)	24320	0.16668	0.508679	0	0	1.55825	2.7919	DGKD;PIK3CA;GAB1;BRAF;PIK3R1;AREG;EREG;HBEGF	.
	positive regulation of T cell proliferation (GO:0042102)	24320	0.16668	0.508679	0	0	1.55825	2.7919	IL6;PNP;TFRC;IL23A;IL1B;EBI3;TNFSF9;SLC7A1	.
	enzyme linked receptor protein signaling pathway (GO:0007167)	15/140	0.167062	0.509493	0	0	1.35658	2.42745	EPHA4;YES1;FLT1;CSF1;RYK;SLA;LMTK2;NEDD9;ACVR2B;MTSS1;AHI1;FER;AXL;CASS4;MET	.
	cilium organization (GO:0044782)	23/228	0.168275	0.511968	0	0	1.26908	2.26169	EXOC8;DNAAF1;WDR19;FOXJ1;BBIP1;DYNLL2;PTPDC1;TMEM231;AHI1;IFT74;CFAP298;RILPL2;ARL13B;KIF3A;TCTN2;TMEM67;MAK;RTTN;WDPCP;B9D2;KIFAP3;IFT46;CFAP20	.
	positive regulation of establishment of protein localization to mitochondrion (GO:1903749)	20637	0.168387	0.511968	0	0	1.6137	2.8748	USP36;TFDP2;FZD5;E2F1;TP53BP2;PMAIP1;YWHAG	.
	negative regulation of tumor necrosis factor production (GO:0032720)	16954	0.168453	0.511968	0	0	1.69418	3.01749	ILRUN;IL10;ARG2;ZC3H12A;TNFAIP3;CD34	.
	postreplication repair (GO:0006301)	16954	0.168453	0.511968	0	0	1.69418	3.01749	UBB;UBE2B;UBC;ZBTB1;DTL;WDR33	.
	regulation of telomerase activity (GO:0051972)	16954	0.168453	0.511968	0	0	1.69418	3.01749	HSP90AB1;TNKS;CTNNB1;NAF1;PRKCQ;MAP3K4	.
	positive regulation of canonical Wnt signaling pathway (GO:0090263)	14/130	0.172531	0.523021	0	0	1.3642	2.39715	DDX3X;SMURF2;UBE2B;TNKS;PPM1N;NRARP;NFKB1;ARNTL;PPM1A;GPRC5B;ZEB2;BAMBI;PSME4;CSNK1G1	.
	cholesterol metabolic process (GO:0008203)	28369	0.17322	0.523021	0	0	1.49534	2.62163	IDI1;SQLE;HMGCS1;INSIG1;CYP51A1;DHCR7;CLN8;ABCG1;ACAT2	.
	import into nucleus (GO:0051170)	28369	0.17322	0.523021	0	0	1.49534	2.62163	RPAIN;NXT1;FAM53C;DDX20;NUP88;NUP153;SMN1;APPL2;SNRPB	.
	negative regulation of developmental process (GO:0051093)	28369	0.17322	0.523021	0	0	1.49534	2.62163	PRKN;KLF7;CDK6;TFRC;RC3H1;FOXJ1;WNT1;DLL1;NKX3-1	.
	positive regulation of endothelial cell proliferation (GO:0001938)	28369	0.17322	0.523021	0	0	1.49534	2.62163	PPP1R16B;NR4A1;EGR3;AKT3;NRARP;F3;SIRT1;HIF1A;VEGFA	.
	dendritic spine organization (GO:0097061)	44313	0.173393	0.523021	0	0	1.96367	3.44073	MTMR2;ARC;WASL;LGMN	.
	L-alpha-amino acid transmembrane transport (GO:1902475)	44313	0.173393	0.523021	0	0	1.96367	3.44073	SLC25A38;SLC7A5;SLC3A2;SLC7A1	.
	positive regulation of erythrocyte differentiation (GO:0045648)	44313	0.173393	0.523021	0	0	1.96367	3.44073	FOXO3;HIF1A;HSPA1B;HSPA1A	.
	positive regulation of muscle cell differentiation (GO:0051149)	44313	0.173393	0.523021	0	0	1.96367	3.44073	SPAG9;RBM4;ABL1;CTNNB1	.
	positive regulation of nuclear division (GO:0051785)	44313	0.173393	0.523021	0	0	1.96367	3.44073	IL1A;RGCC;IL1B;EREG	.
	regulation of toll-like receptor signaling pathway (GO:0034121)	44313	0.173393	0.523021	0	0	1.96367	3.44073	IRF1;GPS2;APPL2;BIRC3	.
	antigen receptor-mediated signaling pathway (GO:0050851)	19/185	0.175312	0.525871	0	0	1.29423	2.25349	DENND1B;BTN2A2;RIPK2;PDE4D;RC3H1;PIK3R1;RC3H2;NFKB1;PIK3CA;ZC3H12A;PSME4;NFKBIZ;PDE4B;CTLA4;PRKCQ;NFKBID;HLA-DQA1;PAG1;TNFRSF21	.
	embryonic axis specification (GO:0000578)	44273	0.176679	0.525871	0	0	2.25781	3.91374	STIL;FZD5;WNT1	.
	embryonic digit morphogenesis (GO:0042733)	44273	0.176679	0.525871	0	0	2.25781	3.91374	OSR2;CREBBP;WDPCP	.
	interleukin-6-mediated signaling pathway (GO:0070102)	44273	0.176679	0.525871	0	0	2.25781	3.91374	SOCS3;FER;IL6	.
	negative regulation of cation transmembrane transport (GO:1904063)	44273	0.176679	0.525871	0	0	2.25781	3.91374	STK39;PPIF;MMP9	.
	negative regulation of lipid catabolic process (GO:0050995)	44273	0.176679	0.525871	0	0	2.25781	3.91374	HCAR2;IL1B;TNF	.
	negative regulation of peptide hormone secretion (GO:0090278)	44273	0.176679	0.525871	0	0	2.25781	3.91374	PRKN;MIDN;BMP8A	.
	neuron maturation (GO:0042551)	44273	0.176679	0.525871	0	0	2.25781	3.91374	FARP2;CLN5;RND1	.
	positive regulation of cell migration involved in sprouting angiogenesis (GO:0090050)	44273	0.176679	0.525871	0	0	2.25781	3.91374	AKT3;PTGS2;VEGFA	.
	positive regulation of macrophage derived foam cell differentiation (GO:0010744)	44273	0.176679	0.525871	0	0	2.25781	3.91374	PRKCH;CSF1;NFKB1	.
	positive regulation of nitric-oxide synthase activity (GO:0051000)	44273	0.176679	0.525871	0	0	2.25781	3.91374	NPR3;HIF1A;TNF	.
	protein O-linked mannosylation (GO:0035269)	44273	0.176679	0.525871	0	0	2.25781	3.91374	CRPPA;POMGNT2;FKTN	.
	regulation of B cell differentiation (GO:0045577)	44273	0.176679	0.525871	0	0	2.25781	3.91374	IL4I1;XBP1;ZFP36L2	.
	regulation of brown fat cell differentiation (GO:0090335)	44273	0.176679	0.525871	0	0	2.25781	3.91374	METRNL;PTGS2;SIRT1	.
	regulation of production of miRNAs involved in gene silencing by miRNA (GO:1903798)	44273	0.176679	0.525871	0	0	2.25781	3.91374	IL6;ZC3H12A;TNF	.
	regulation of protein sumoylation (GO:0033233)	44273	0.176679	0.525871	0	0	2.25781	3.91374	HDAC4;CTNNB1;GNL3	.
	response to interferon-alpha (GO:0035455)	44273	0.176679	0.525871	0	0	2.25781	3.91374	AXL;PDE12;KLHL20	.
	protein N-linked glycosylation (GO:0006487)	24685	0.176719	0.525871	0	0	1.53176	2.65484	FUT8;B4GALT1;ALG9;MGAT4A;PGM3;ALG13;SLC39A8;ST3GAL1	.
	regulation of viral genome replication (GO:0045069)	24685	0.176719	0.525871	0	0	1.53176	2.65484	ISG20;DDX3X;PDE12;PKN2;TMEM39A;ADARB1;ZC3HAV1;TNF	.
	vascular endothelial growth factor receptor signaling pathway (GO:0048010)	24685	0.176719	0.525871	0	0	1.53176	2.65484	CYFIP2;NCKAP1;FLT1;PIK3CA;AXL;MAPKAPK2;PIK3R1;VEGFA	.
	cytoskeleton organization (GO:0007010)	13/120	0.178179	0.529858	0	0	1.37314	2.36861	ZRANB1;TNFAIP3;NEDD9;KLHL20;RND1;ARC;STRIP2;DIAPH3;CCL3;WDPCP;OBSL1;PDZD8;BRWD3	.
	regulation of reactive oxygen species metabolic process (GO:2000377)	21002	0.179426	0.532112	0	0	1.58134	2.71673	PRKN;CDKN1A;GADD45A;DCXR;ZC3H12A;THBS1;SLC25A33	.
	anterograde axonal transport (GO:0008089)	13636	0.17954	0.532112	0	0	1.76445	3.0302	AP3M2;KIF3A;KIF4A;MAP1A;KIF1B	.
	lysosome localization (GO:0032418)	13636	0.17954	0.532112	0	0	1.76445	3.0302	SPAG9;RAB3A;NR4A3;BORCS5;NDEL1	.
	negative regulation of G1/S transition of mitotic cell cycle (GO:2000134)	13636	0.17954	0.532112	0	0	1.76445	3.0302	PLK3;CDKN1A;WEE1;CDK6;DCUN1D3	.
	positive regulation of myeloid cell differentiation (GO:0045639)	13636	0.17954	0.532112	0	0	1.76445	3.0302	PITHD1;FOXO3;HIF1A;HSPA1B;HSPA1A	.
	embryonic heart tube morphogenesis (GO:0003143)	17319	0.180745	0.534966	0	0	1.65277	2.82734	AHI1;STIL;SRF;DNAAF1;HES1;DLL1	.
	regulation of T cell activation (GO:0050863)	17319	0.180745	0.534966	0	0	1.65277	2.82734	IL4I1;CRTAM;ABL1;TNFSF9;PRKCQ;PAG1	.
	positive regulation of Wnt signaling pathway (GO:0030177)	16/153	0.181251	0.536103	0	0	1.32022	2.25477	ZRANB1;DDX3X;SMURF2;UBE2B;TNKS;PPM1N;TNFAIP3;NRARP;NFKB1;ARNTL;PPM1A;GPRC5B;ZEB2;BAMBI;PSME4;CSNK1G1	.
	double-strand break repair (GO:0006302)	17/164	0.181519	0.536537	0	0	1.30741	2.23095	BARD1;H2AX;FEN1;KDM2A;PAXIP1;CDCA5;H4-16;TENT4A;POLA1;BABAM2;SFPQ;NSD2;RPA4;NABP1;ERCC5;TRIP13;KPNA2	.
	regulation of interleukin-6 production (GO:0032675)	12/110	0.183999	0.542203	0	0	1.38374	2.34244	IL10;IL1A;XBP1;IL6;EOLA1;IL1B;ZC3H12A;MAPKAPK2;TNFAIP3;FOXJ1;TNF;EREG	.
	cellular response to interferon-gamma (GO:0071346)	13/121	0.185763	0.542203	0	0	1.36035	2.28985	CCL3L1;CCL20;RPL13A;IFI30;ICAM1;PDE12;IRF4;IRF1;CCL4;CCL3;XCL1;HLA-DQA1;CD44	.
	positive regulation of translation (GO:0045727)	11/100	0.189972	0.542203	0	0	1.39652	2.31946	NGRN;IL6;DDX3X;YTHDF3;EIF4A3;BCL3;EEF2;CPEB3;ZCCHC4;YBX3;THBS1	.
	cellular response to interleukin-6 (GO:0071354)	44314	0.190151	0.542203	0	0	1.88174	3.12357	SOCS3;FER;IL6;NFKB1	.
	glycerophospholipid catabolic process (GO:0046475)	44314	0.190151	0.542203	0	0	1.88174	3.12357	LIPC;PNPLA8;ENPP2;GPCPD1	.
	internal peptidyl-lysine acetylation (GO:0018393)	44314	0.190151	0.542203	0	0	1.88174	3.12357	CREBBP;KAT6B;EP300;KAT7	.
	keratan sulfate biosynthetic process (GO:0018146)	44314	0.190151	0.542203	0	0	1.88174	3.12357	B4GALT1;B3GNT7;ST3GAL1;B4GALT4	.
	L-amino acid transport (GO:0015807)	44314	0.190151	0.542203	0	0	1.88174	3.12357	SLC7A5;SLC3A2;SLC7A1;SLC38A2	.
	negative regulation of phosphatase activity (GO:0010923)	44314	0.190151	0.542203	0	0	1.88174	3.12357	PPP1R15A;CRY2;GPATCH2;MASTL	.
	positive regulation of cytosolic calcium ion concentration involved in phospholipase C-activating G protein-coupled signaling pathway (GO:0051482)	44314	0.190151	0.542203	0	0	1.88174	3.12357	P2RY10;GPR35;GPR18;GPR157	.
	positive regulation of monooxygenase activity (GO:0032770)	44314	0.190151	0.542203	0	0	1.88174	3.12357	IL1B;NPR3;HIF1A;TNF	.
	positive regulation of protein import into nucleus (GO:0042307)	44314	0.190151	0.542203	0	0	1.88174	3.12357	BAG3;ZC3H12A;PIK3R1;ZPR1	.
	protein localization to Golgi apparatus (GO:0034067)	44314	0.190151	0.542203	0	0	1.88174	3.12357	ARL5B;SYS1;PAQR3;OBSL1	.
	regulation of microtubule polymerization or depolymerization (GO:0031110)	44314	0.190151	0.542203	0	0	1.88174	3.12357	STMN1;MAP1A;ABL1;CLASP1	.
	regulation of phosphatase activity (GO:0010921)	44314	0.190151	0.542203	0	0	1.88174	3.12357	PPP1R17;GPATCH2;MTMR9;TSC1	.
	regulation of postsynapse organization (GO:0099175)	44314	0.190151	0.542203	0	0	1.88174	3.12357	EPHA4;ARC;CDKL5;HOMER1	.
	regulation of small molecule metabolic process (GO:0062012)	44314	0.190151	0.542203	0	0	1.88174	3.12357	PRKN;RORA;SIRT1;TTC39B	.
	sulfur compound transport (GO:0072348)	44314	0.190151	0.542203	0	0	1.88174	3.12357	SLC5A6;SLC25A26;SLC25A30;SLC19A2	.
	autophagosome assembly (GO:0000045)	21367	0.190761	0.542203	0	0	1.55025	2.56836	GABARAPL1;MAP1LC3A;ATG101;SMURF1;ATG16L1;TP53INP2;TP53INP1	.
	muscle organ development (GO:0007517)	21367	0.190761	0.542203	0	0	1.55025	2.56836	EGR3;CHD2;UTRN;EMD;MEF2D;HBEGF;FKTN	.
	positive regulation of protein binding (GO:0032092)	21367	0.190761	0.542203	0	0	1.55025	2.56836	PRKN;TCF7L2;RIPK2;BAMBI;AMFR;ABL1;MMP9	.
	receptor metabolic process (GO:0043112)	21367	0.190761	0.542203	0	0	1.55025	2.56836	ARFGEF2;UVRAG;TFRC;SMURF1;LMTK2;ADM;LGMN	.
	amino sugar metabolic process (GO:0006040)	44237	0.19323	0.542203	0	0	2.8216	4.63837	ST3GAL1;GNE	.
	cellular response to interleukin-4 (GO:0071353)	44237	0.19323	0.542203	0	0	2.8216	4.63837	XBP1;XCL1	.
	cellular response to leucine (GO:0071233)	44237	0.19323	0.542203	0	0	2.8216	4.63837	SESN3;SESN2	.
	cellular response to leucine starvation (GO:1990253)	44237	0.19323	0.542203	0	0	2.8216	4.63837	SESN3;SESN2	.
	chloride ion homeostasis (GO:0055064)	44237	0.19323	0.542203	0	0	2.8216	4.63837	SLC12A2;SLC12A6	.
	chondroitin sulfate proteoglycan metabolic process (GO:0050654)	44237	0.19323	0.542203	0	0	2.8216	4.63837	CSGALNACT2;XYLT1	.
	DNA replication-dependent nucleosome assembly (GO:0006335)	44237	0.19323	0.542203	0	0	2.8216	4.63837	NASP;H4-16	.
	DNA replication-dependent nucleosome organization (GO:0034723)	44237	0.19323	0.542203	0	0	2.8216	4.63837	NASP;H4-16	.
	dosage compensation (GO:0007549)	44237	0.19323	0.542203	0	0	2.8216	4.63837	RBM15;YTHDC1	.
	granulocyte migration (GO:0097530)	44237	0.19323	0.542203	0	0	2.8216	4.63837	CCL3;JAM3	.
	leptin-mediated signaling pathway (GO:0033210)	44237	0.19323	0.542203	0	0	2.8216	4.63837	EBI3;SIRT1	.
	long-chain fatty acid import into cell (GO:0044539)	44237	0.19323	0.542203	0	0	2.8216	4.63837	SLC2A1;SLC27A2	.
	lung epithelium development (GO:0060428)	44237	0.19323	0.542203	0	0	2.8216	4.63837	ERRFI1;FOXJ1	.
	membrane lipid catabolic process (GO:0046466)	44237	0.19323	0.542203	0	0	2.8216	4.63837	SMPD2;ENPP2	.
	methylguanosine-cap decapping (GO:0110156)	44237	0.19323	0.542203	0	0	2.8216	4.63837	DCP1A;PNRC2	.
	mitotic DNA replication (GO:1902969)	44237	0.19323	0.542203	0	0	2.8216	4.63837	POLA1;MCM6	.
	mitotic DNA replication checkpoint signaling (GO:0033314)	44237	0.19323	0.542203	0	0	2.8216	4.63837	CDC6;CLSPN	.
	modification-dependent macromolecule catabolic process (GO:0043632)	44237	0.19323	0.542203	0	0	2.8216	4.63837	UBB;UBC	.
	modulation by symbiont of host process (GO:0044003)	44237	0.19323	0.542203	0	0	2.8216	4.63837	UBB;UBC	.
	monovalent inorganic anion homeostasis (GO:0055083)	44237	0.19323	0.542203	0	0	2.8216	4.63837	SLC12A2;SLC12A6	.
	N-acetylneuraminate metabolic process (GO:0006054)	44237	0.19323	0.542203	0	0	2.8216	4.63837	ST3GAL1;GNE	.
	negative regulation of cAMP-mediated signaling (GO:0043951)	44237	0.19323	0.542203	0	0	2.8216	4.63837	UBE2B;PDE4D	.
	negative regulation of cell adhesion mediated by integrin (GO:0033629)	44237	0.19323	0.542203	0	0	2.8216	4.63837	SERPINE1;JAM3	.
	negative regulation of cell-cell adhesion mediated by cadherin (GO:2000048)	44237	0.19323	0.542203	0	0	2.8216	4.63837	RGCC;VEGFA	.
	negative regulation of cellular protein catabolic process (GO:1903363)	44237	0.19323	0.542203	0	0	2.8216	4.63837	EFNA1;EPHA4	.
	negative regulation of humoral immune response mediated by circulating immunoglobulin (GO:0002924)	44237	0.19323	0.542203	0	0	2.8216	4.63837	FOXJ1;CD55	.
	negative regulation of interferon-beta production (GO:0032688)	44237	0.19323	0.542203	0	0	2.8216	4.63837	REL;RELB	.
	negative regulation of protein exit from endoplasmic reticulum (GO:0070862)	44237	0.19323	0.542203	0	0	2.8216	4.63837	INSIG1;YOD1	.
	negative regulation of transcription by competitive promoter binding (GO:0010944)	44237	0.19323	0.542203	0	0	2.8216	4.63837	KDM2A;SMAD7	.
	negative regulation of tyrosine phosphorylation of STAT protein (GO:0042532)	44237	0.19323	0.542203	0	0	2.8216	4.63837	SOCS3;SOCS1	.
	negative regulation of vascular endothelial growth factor signaling pathway (GO:1900747)	44237	0.19323	0.542203	0	0	2.8216	4.63837	SPRY2;IL12A	.
	neuron projection fasciculation (GO:0106030)	44237	0.19323	0.542203	0	0	2.8216	4.63837	EPHA4;ARHGAP35	.
	neuron remodeling (GO:0016322)	44237	0.19323	0.542203	0	0	2.8216	4.63837	FARP2;RND1	.
	nuclear pore complex assembly (GO:0051292)	44237	0.19323	0.542203	0	0	2.8216	4.63837	AHCTF1;NUP153	.
	positive regulation of behavior (GO:0048520)	44237	0.19323	0.542203	0	0	2.8216	4.63837	NR4A3;CFAP20	.
	positive regulation of circadian rhythm (GO:0042753)	44237	0.19323	0.542203	0	0	2.8216	4.63837	RORA;ARNTL	.
	positive regulation of coagulation (GO:0050820)	44237	0.19323	0.542203	0	0	2.8216	4.63837	SERPINE1;THBS1	.
	positive regulation of hemostasis (GO:1900048)	44237	0.19323	0.542203	0	0	2.8216	4.63837	SERPINE1;THBS1	.
	positive regulation of mRNA 3'-end processing (GO:0031442)	44237	0.19323	0.542203	0	0	2.8216	4.63837	PAF1;CPEB3	.
	positive regulation of protein sumoylation (GO:0033235)	44237	0.19323	0.542203	0	0	2.8216	4.63837	HDAC4;GNL3	.
	positive regulation of vascular endothelial growth factor receptor signaling pathway (GO:0030949)	44237	0.19323	0.542203	0	0	2.8216	4.63837	IL1B;HIF1A	.
	protein poly-ADP-ribosylation (GO:0070212)	44237	0.19323	0.542203	0	0	2.8216	4.63837	TNKS;ZC3HAV1	.
	receptor recycling (GO:0001881)	44237	0.19323	0.542203	0	0	2.8216	4.63837	ARFGEF2;LMTK2	.
	regulation of actin filament-based movement (GO:1903115)	44237	0.19323	0.542203	0	0	2.8216	4.63837	PDE4D;PDE4B	.
	regulation of bile acid biosynthetic process (GO:0070857)	44237	0.19323	0.542203	0	0	2.8216	4.63837	STARD4;SIRT1	.
	regulation of cilium movement (GO:0003352)	44237	0.19323	0.542203	0	0	2.8216	4.63837	CFAP298;DNAAF1	.
	regulation of epithelial cell apoptotic process (GO:1904035)	44237	0.19323	0.542203	0	0	2.8216	4.63837	ZFP36;TNF	.
	regulation of macrophage migration (GO:1905521)	44237	0.19323	0.542203	0	0	2.8216	4.63837	CSF1;MTUS1	.
	regulation of microtubule nucleation (GO:0010968)	44237	0.19323	0.542203	0	0	2.8216	4.63837	HSPA1B;HSPA1A	.
	regulation of podosome assembly (GO:0071801)	44237	0.19323	0.542203	0	0	2.8216	4.63837	FSCN1;TNF	.
	regulation of store-operated calcium entry (GO:2001256)	44237	0.19323	0.542203	0	0	2.8216	4.63837	HOMER1;SARAF	.
	regulation of type B pancreatic cell development (GO:2000074)	44237	0.19323	0.542203	0	0	2.8216	4.63837	CLOCK;ARNTL	.
	regulation of urine volume (GO:0035809)	44237	0.19323	0.542203	0	0	2.8216	4.63837	NPR3;ADM	.
	response to interleukin-4 (GO:0070670)	44237	0.19323	0.542203	0	0	2.8216	4.63837	XBP1;XCL1	.
	response to leucine (GO:0043201)	44237	0.19323	0.542203	0	0	2.8216	4.63837	SESN3;SESN2	.
	small nucleolar ribonucleoprotein complex assembly (GO:0000491)	44237	0.19323	0.542203	0	0	2.8216	4.63837	NUFIP1;NAF1	.
	urea cycle (GO:0000050)	44237	0.19323	0.542203	0	0	2.8216	4.63837	SLC25A15;ARG2	.
	negative regulation of tumor necrosis factor superfamily cytokine production (GO:1903556)	17685	0.193381	0.542203	0	0	1.61333	2.65085	ILRUN;IL10;ARG2;ZC3H12A;TNFAIP3;CD34	.
	positive regulation of blood vessel endothelial cell migration (GO:0043536)	17685	0.193381	0.542203	0	0	1.61333	2.65085	AKT3;PTGS2;HIF1A;THBS1;SIRT1;VEGFA	.
	negative regulation of endothelial cell migration (GO:0010596)	14001	0.193888	0.542936	0	0	1.71089	2.80667	RGCC;GADD45A;DNAJA4;THBS1;TNF	.
	negative regulation of G0 to G1 transition (GO:0070317)	14001	0.193888	0.542936	0	0	1.71089	2.80667	RYBP;TFDP2;E2F1;FOXO4;PHC3	.
	negative regulation of protein kinase activity (GO:0006469)	33147	0.196067	0.544205	0	0	1.41221	2.30092	PTPN1;CDKN1A;CDKN1B;DEPTOR;DUSP10;GADD45A;ABL1;ADARB1;CEP43;YWHAG	.
	negative regulation of signal transduction (GO:0009968)	26/267	0.196364	0.544205	0	0	1.22017	1.98618	MTMR2;GPS2;TNFAIP3;NRARP;TNF;DLL1;THBS1;SOCS1;IL12A;NKX3-1;IL10;PTPN1;TLE1;SIAH2;SIAH1;HIC1;NR4A2;ASXL1;PTPRE;IL1B;DDIT4;CRY1;SPRY2;PRKCQ;SPRY1;LGMN	.
	negative regulation of cellular catabolic process (GO:0031330)	25416	0.197565	0.544205	0	0	1.48138	2.40233	IL10;MTMR2;MTMR8;TIMP3;MTMR9;TIMP1;MET;MCL1	.
	cardiac muscle cell contraction (GO:0086003)	44274	0.197915	0.544205	0	0	2.11658	3.42869	KCNE1;PIK3CA;ATP1A1	.
	long-term memory (GO:0007616)	44274	0.197915	0.544205	0	0	2.11658	3.42869	ARC;CPEB3;LDLR	.
	maintenance of protein localization in organelle (GO:0072595)	44274	0.197915	0.544205	0	0	2.11658	3.42869	BCL3;TOPORS;TAPT1	.
	mesenchymal cell development (GO:0014031)	44274	0.197915	0.544205	0	0	2.11658	3.42869	NOLC1;KBTBD8;TAPT1	.
	negative regulation of RNA metabolic process (GO:0051253)	44274	0.197915	0.544205	0	0	2.11658	3.42869	ZC3H12A;TNF;PTBP2	.
	negative regulation of RNA splicing (GO:0033119)	44274	0.197915	0.544205	0	0	2.11658	3.42869	SRSF6;RBMX;PTBP2	.
	neural crest cell differentiation (GO:0014033)	44274	0.197915	0.544205	0	0	2.11658	3.42869	NOLC1;KBTBD8;TAPT1	.
	nucleotide-sugar biosynthetic process (GO:0009226)	44274	0.197915	0.544205	0	0	2.11658	3.42869	SLC35D1;PGM3;UAP1	.
	pore complex assembly (GO:0046931)	44274	0.197915	0.544205	0	0	2.11658	3.42869	AFDN;AHCTF1;NUP153	.
	positive regulation of focal adhesion assembly (GO:0051894)	44274	0.197915	0.544205	0	0	2.11658	3.42869	ABL1;TSC1;VEGFA	.
	positive regulation of macrophage migration (GO:1905523)	44274	0.197915	0.544205	0	0	2.11658	3.42869	CSF1;CCL3;THBS1	.
	positive regulation of oxidoreductase activity (GO:0051353)	44274	0.197915	0.544205	0	0	2.11658	3.42869	ABL1;ABL2;TNF	.
	positive regulation of triglyceride metabolic process (GO:0090208)	44274	0.197915	0.544205	0	0	2.11658	3.42869	NR1H2;ABHD5;LDLR	.
	prostaglandin biosynthetic process (GO:0001516)	44274	0.197915	0.544205	0	0	2.11658	3.42869	PNPLA8;PTGS2;PTGES	.
	Rac protein signal transduction (GO:0016601)	44274	0.197915	0.544205	0	0	2.11658	3.42869	FARP2;NCKAP1;HACE1	.
	regulation of autophagy of mitochondrion (GO:1903146)	44274	0.197915	0.544205	0	0	2.11658	3.42869	PRKN;USP36;FZD5	.
	regulation of bicellular tight junction assembly (GO:2000810)	44274	0.197915	0.544205	0	0	2.11658	3.42869	PRKCH;SNAI1;TNF	.
	regulation of cell-cell adhesion mediated by cadherin (GO:2000047)	44274	0.197915	0.544205	0	0	2.11658	3.42869	AFDN;RGCC;VEGFA	.
	regulation of collagen biosynthetic process (GO:0032965)	44274	0.197915	0.544205	0	0	2.11658	3.42869	IL6;RGCC;SUCO	.
	regulation of histone H3-K4 methylation (GO:0051569)	44274	0.197915	0.544205	0	0	2.11658	3.42869	PAXIP1;AUTS2;CTNNB1	.
	regulation of leukocyte chemotaxis (GO:0002688)	44274	0.197915	0.544205	0	0	2.11658	3.42869	IL6;MTUS1;XCL1	.
	regulation of mitochondrial membrane permeability (GO:0046902)	44274	0.197915	0.544205	0	0	2.11658	3.42869	PPIF;PMAIP1;SLC25A4	.
	regulation of oligodendrocyte differentiation (GO:0048713)	44274	0.197915	0.544205	0	0	2.11658	3.42869	CXCR4;HES1;TNFRSF21	.
	regulation of RIG-I signaling pathway (GO:0039535)	44274	0.197915	0.544205	0	0	2.11658	3.42869	NOP53;ZCCHC3;BIRC3	.
	regulation of stem cell population maintenance (GO:2000036)	44274	0.197915	0.544205	0	0	2.11658	3.42869	NCOA3;TAF5L;WDR43	.
	regulation of vascular endothelial growth factor signaling pathway (GO:1900746)	44274	0.197915	0.544205	0	0	2.11658	3.42869	SPRY2;IL12A;DLL1	.
	positive regulation of protein localization to membrane (GO:1905477)	11/101	0.198635	0.545844	0	0	1.38093	2.23198	PRKN;PRKCH;TFDP2;TP53BP2;E2F1;PMAIP1;PIK3R1;SORBS1;TNF;YWHAG;PLS1	.
	regulation of GTPase activity (GO:0043087)	19/189	0.199864	0.548881	0	0	1.2635	2.03438	USP6NL;EPHA4;CDKL5;CCL3L1;CCL20;RGS16;SNX13;ARHGAP12;NET1;AFDN;KLRK1;LRCH1;ALS2;RGS1;CCL4;CCL3;XCL1;CPEB2;NDEL1	.
	regulation of cytoskeleton organization (GO:0051493)	12/112	0.200337	0.549838	0	0	1.35592	2.17998	CYLD;PHLDB1;DLC1;FSCN1;ABL1;TRIM36;RICTOR;TPPP;EZR;ARHGAP35;CLASP1;RND1	.
	protein polymerization (GO:0051258)	21732	0.202375	0.554741	0	0	1.52036	2.42897	PRKN;DIAPH3;UBE2C;UBE2S;SPIRE2;WASL;TPPP	.
	response to reactive oxygen species (GO:0000302)	21732	0.202375	0.554741	0	0	1.52036	2.42897	PLK3;FER;ERCC6L2;SOD2;MMP9;SIRT1;HIF1A	.
	positive regulation of protein phosphorylation (GO:0001934)	35/371	0.203497	0.557471	0	0	1.17857	1.87641	CDKN1A;DDX3X;HSP90AB1;TFRC;CSF1;TNF;LRP8;CCND1;FGF9;ENPP2;ABL1;FNIP1;PDE8A;NKX3-1;MMD;RIPK2;SPHK1;LIMK2;BMP8A;OSM;PLAUR;BRAF;SIRT1;MMP9;EREG;VEGFA;EFNA1;IL6;ALS2;TRAF4;IL1B;AKAP9;SPDYA;SPRY2;CD44	.
	negative regulation of catabolic process (GO:0009895)	18050	0.206339	0.56371	0	0	1.57572	2.48686	HDAC4;HCAR2;IL1B;CYP51A1;TNF;AZIN1	.
	oligosaccharide metabolic process (GO:0009311)	18050	0.206339	0.56371	0	0	1.57572	2.48686	FUT8;NEU4;B4GALT1;NEU1;GLA;ST6GALNAC6	.
	regulation of cellular localization (GO:0060341)	18050	0.206339	0.56371	0	0	1.57572	2.48686	PRKN;FER;HSP90AB1;PARD6A;SPAG5;STXBP4	.
	regulation of interferon-beta production (GO:0032648)	18050	0.206339	0.56371	0	0	1.57572	2.48686	DDX3X;RIPK2;TRAF3;IRF1;REL;RELB	.
	MAPK cascade (GO:0000165)	29/303	0.206413	0.56371	0	0	1.19711	1.88889	PTGER4;SPTBN5;IRS2;PIK3R1;AREG;TNF;ZFP36L2;RASGRP3;ZFP36;FGF9;UBB;UBC;CCL3;MAP3K8;DUSP5;PAQR3;BRAF;NFKB1;EREG;PIK3CA;IL1B;RASA1;PSME4;MAPKAPK2;RASA2;CDK1;PRKCQ;MET;HBEGF	.
	negative regulation of interferon-gamma production (GO:0032689)	44315	0.207394	0.565541	0	0	1.80638	2.84167	AXL;DDIT3;ZC3H12A;XCL1	.
	mitotic sister chromatid segregation (GO:0000070)	11/102	0.207468	0.565541	0	0	1.36568	2.14791	EML4;KIF18A;SPAG5;CDCA5;CHMP1B;MIS12;CDK1;H4-16;NCAPG;TENT4A;TTN	.
	positive regulation of cell growth (GO:0030307)	11/102	0.207468	0.565541	0	0	1.36568	2.14791	SUPV3L1;GOLGA4;CDKL5;DDX3X;SMURF1;SPHK1;ADNP2;CEP43;SLC25A33;CDKN2AIP;CXCL16	.
	carbohydrate homeostasis (GO:0033500)	25781	0.208349	0.565541	0	0	1.4574	2.286	TCF7L2;KLF7;MBD5;IL6;CRY2;CRY1;TENT4B;APPL2	.
	cellular response to light stimulus (GO:0071482)	25781	0.208349	0.565541	0	0	1.4574	2.286	CASP9;CREBBP;NSMCE3;SDE2;ZBTB1;EP300;ATF4;ATR	.
	establishment of protein localization to membrane (GO:0090150)	25781	0.208349	0.565541	0	0	1.4574	2.286	RABGEF1;AFDN;ZDHHC18;NPC1;VPS37C;ZDHHC23;BRAF;VPS37B	.
	neutrophil chemotaxis (GO:0030593)	25781	0.208349	0.565541	0	0	1.4574	2.286	CCL3L1;CCL20;CCL4;PDE4B;CCL3;XCL1;CXCL3;CXCL2	.
	endothelial cell migration (GO:0043542)	14366	0.20862	0.565541	0	0	1.66048	2.60237	NR4A1;EGR3;PIK3CA;ABL1;VEGFA	.
	negative regulation of cellular metabolic process (GO:0031324)	14366	0.20862	0.565541	0	0	1.66048	2.60237	PRKN;MTMR2;BTN2A2;PTX3;NFKB1	.
	regulation of intracellular transport (GO:0032386)	14366	0.20862	0.565541	0	0	1.66048	2.60237	RBM4;PTPN1;RNF139;SPAG5;NDEL1	.
	regulation of ion transmembrane transporter activity (GO:0032412)	14366	0.20862	0.565541	0	0	1.66048	2.60237	HOMER1;STK39;PPIF;FXYD6;UTRN	.
	regulation of peptidyl-threonine phosphorylation (GO:0010799)	14366	0.20862	0.565541	0	0	1.66048	2.60237	RIPK2;SPHK1;DDIT4;SPRY2;SMAD7	.
	negative regulation of protein modification process (GO:0031400)	29830	0.212318	0.575212	0	0	1.41196	2.18807	PPP1R16B;PPP1R15A;PRKN;PPP1R15B;ZC3H12A;PAQR3;MYADM;TPPP;SIRT1	.
	organelle organization (GO:0006996)	39/420	0.216655	0.582232	0	0	1.15817	1.77137	USP6NL;PRKN;SPTBN5;DYRK3;SAR1A;NEDD9;TNFAIP3;WASL;TFB1M;STRIP2;ATXN7;KIF3A;CHMP1B;CCL3;BNIP1;KIFAP3;PDZD8;CLASP1;ZRANB1;HACE1;YTHDF3;FBXW8;MTX3;EIF2AK3;GEM;KLHL20;ARC;DIAPH3;POLG2;GOLGB1;KIF4A;CYCS;WDPCP;SLC25A33;OBSL1;PI4K2A;GOLGA8A;SLC25A36;BRWD3	.
	histone modification (GO:0016570)	12/114	0.217294	0.582232	0	0	1.32919	2.02901	HDAC4;USP36;CREBBP;UBE2B;KAT6B;ATXN7;USP3;MIDEAS;BRMS1L;EP300;SIRT1;SUPT3H	.
	ribonucleoprotein complex assembly (GO:0022618)	14/136	0.217399	0.582232	0	0	1.29669	1.97877	HSP90AB1;YTHDC1;RPS5;RPLP0;DDX20;EIF5;CLP1;STRAP;NAF1;SMN1;SRSF6;NOP53;SF1;SNRPB	.
	fatty acid biosynthetic process (GO:0006633)	26146	0.219356	0.582232	0	0	1.43419	2.17576	FADS3;XBP1;LIPC;ACSM3;SCD;PTGS2;MCAT;ACACA	.
	Fc-gamma receptor signaling pathway involved in phagocytosis (GO:0038096)	26146	0.219356	0.582232	0	0	1.43419	2.17576	CYFIP2;NCKAP1;HSP90AB1;YES1;PIK3CA;ABL1;WASL;PIK3R1	.
	gland development (GO:0048732)	26146	0.219356	0.582232	0	0	1.43419	2.17576	XBP1;ZBTB1;ARID5B;HES1;EZR;MET;ARHGAP35;NKX3-1	.
	organic hydroxy compound biosynthetic process (GO:1901617)	18415	0.219595	0.582232	0	0	1.53983	2.33433	PER2;SQLE;INSIG1;OSBP;DHCR7;SLC27A2	.
	endoplasmic reticulum calcium ion homeostasis (GO:0032469)	44275	0.219719	0.582232	0	0	1.99197	3.01864	THADA;SELENOK;HERPUD1	.
	establishment of epithelial cell polarity (GO:0090162)	44275	0.219719	0.582232	0	0	1.99197	3.01864	EZR;CLASP1;CYTH1	.
	ganglioside metabolic process (GO:0001573)	44275	0.219719	0.582232	0	0	1.99197	3.01864	NEU4;NEU1;ST6GALNAC6	.
	glucose transmembrane transport (GO:1904659)	44275	0.219719	0.582232	0	0	1.99197	3.01864	SLC2A14;SLC2A1;SLC2A3	.
	granulocyte differentiation (GO:0030851)	44275	0.219719	0.582232	0	0	1.99197	3.01864	CDKN1A;E2F1;EP300	.
	hepaticobiliary system development (GO:0061008)	44275	0.219719	0.582232	0	0	1.99197	3.01864	XBP1;ARID5B;MET	.
	maintenance of protein location in nucleus (GO:0051457)	44275	0.219719	0.582232	0	0	1.99197	3.01864	BARD1;BCL3;TOPORS	.
	natural killer cell mediated immunity (GO:0002228)	44275	0.219719	0.582232	0	0	1.99197	3.01864	KLRK1;TUBB4B;ULBP2	.
	negative regulation of dephosphorylation (GO:0035305)	44275	0.219719	0.582232	0	0	1.99197	3.01864	PPP1R15A;PPP1R16B;GPATCH2	.
	positive regulation of epithelial cell differentiation (GO:0030858)	44275	0.219719	0.582232	0	0	1.99197	3.01864	AHI1;BTG1;FOXJ1	.
	positive regulation of lymphocyte differentiation (GO:0045621)	44275	0.219719	0.582232	0	0	1.99197	3.01864	XBP1;AXL;ZBTB1	.
	positive regulation of nitrogen compound metabolic process (GO:0051173)	44275	0.219719	0.582232	0	0	1.99197	3.01864	TNF;KLF2;NFKB1	.
	regulation of granulocyte chemotaxis (GO:0071622)	44275	0.219719	0.582232	0	0	1.99197	3.01864	CSF1;THBS1;JAM3	.
	regulation of gene expression, epigenetic (GO:0040029)	30195	0.222605	0.582232	0	0	1.39254	2.09209	HDAC4;TAF1D;POLR1C;H4-16;EP300;DDX21;POLR1F;JARID2;POLR1H	.
	bone development (GO:0060348)	14732	0.2237	0.582232	0	0	1.61295	2.41531	PTGER4;OSR2;SBDS;RPL13;WNT1	.
	carboxylic acid metabolic process (GO:0019752)	14732	0.2237	0.582232	0	0	1.61295	2.41531	GSTO2;SLC2A1;SLC2A3;ST3GAL1;GNE	.
	regulation of microtubule polymerization (GO:0031113)	14732	0.2237	0.582232	0	0	1.61295	2.41531	STMN1;AKAP9;ABL1;MET;CLASP1	.
	response to organonitrogen compound (GO:0010243)	14732	0.2237	0.582232	0	0	1.61295	2.41531	PRKN;IL6;RNF139;KAT7;MARCHF6	.
	actin filament network formation (GO:0051639)	44238	0.224117	0.582232	0	0	2.50796	3.75086	SPIRE2;PLS1	.
	cell-cell junction maintenance (GO:0045217)	44238	0.224117	0.582232	0	0	2.50796	3.75086	PARD6A;MYADM	.
	chromatin-mediated maintenance of transcription (GO:0048096)	44238	0.224117	0.582232	0	0	2.50796	3.75086	SERTAD1;SERTAD2	.
	cyclooxygenase pathway (GO:0019371)	44238	0.224117	0.582232	0	0	2.50796	3.75086	PTGS2;PTGES	.
	fatty acid homeostasis (GO:0055089)	44238	0.224117	0.582232	0	0	2.50796	3.75086	XBP1;SIRT1	.
	Golgi inheritance (GO:0048313)	44238	0.224117	0.582232	0	0	2.50796	3.75086	PLK3;CDK1	.
	insulin-like growth factor receptor signaling pathway (GO:0048009)	44238	0.224117	0.582232	0	0	2.50796	3.75086	EIF2AK3;PIK3R1	.
	interleukin-35-mediated signaling pathway (GO:0070757)	44238	0.224117	0.582232	0	0	2.50796	3.75086	EBI3;IL12A	.
	miRNA mediated inhibition of translation (GO:0035278)	44238	0.224117	0.582232	0	0	2.50796	3.75086	RBM4;ZFP36	.
	negative regulation of bone remodeling (GO:0046851)	44238	0.224117	0.582232	0	0	2.50796	3.75086	IL6;TNFAIP3	.
	negative regulation of defense response to virus (GO:0050687)	44238	0.224117	0.582232	0	0	2.50796	3.75086	ILRUN;PCBP2	.
	negative regulation of interleukin-17 production (GO:0032700)	44238	0.224117	0.582232	0	0	2.50796	3.75086	DDIT3;IL12A	.
	negative regulation of lymphocyte migration (GO:2000402)	44238	0.224117	0.582232	0	0	2.50796	3.75086	LRCH1;WASL	.
	negative regulation of sprouting angiogenesis (GO:1903671)	44238	0.224117	0.582232	0	0	2.50796	3.75086	THBS1;KLF2	.
	negative regulation of steroid biosynthetic process (GO:0010894)	44238	0.224117	0.582232	0	0	2.50796	3.75086	SNAI1;NFKB1	.
	negative regulation of translation, ncRNA-mediated (GO:0040033)	44238	0.224117	0.582232	0	0	2.50796	3.75086	RBM4;ZFP36	.
	Notch signaling involved in heart development (GO:0061314)	44238	0.224117	0.582232	0	0	2.50796	3.75086	JAG1;SNAI1	.
	organophosphate catabolic process (GO:0046434)	44238	0.224117	0.582232	0	0	2.50796	3.75086	ENPP2;NUDT15	.
	peptidyl-lysine monomethylation (GO:0018026)	44238	0.224117	0.582232	0	0	2.50796	3.75086	CSKMT;EEF1AKMT2	.
	positive regulation of actin nucleation (GO:0051127)	44238	0.224117	0.582232	0	0	2.50796	3.75086	NCKAP1;FCHSD2	.
	positive regulation of cellular extravasation (GO:0002693)	44238	0.224117	0.582232	0	0	2.50796	3.75086	ICAM1;JAM3	.
	positive regulation of ceramide biosynthetic process (GO:2000304)	44238	0.224117	0.582232	0	0	2.50796	3.75086	SMPD2;TNF	.
	positive regulation of keratinocyte proliferation (GO:0010838)	44238	0.224117	0.582232	0	0	2.50796	3.75086	STXBP4;AREG	.
	positive regulation of leukocyte apoptotic process (GO:2000108)	44238	0.224117	0.582232	0	0	2.50796	3.75086	HCAR2;SIRT1	.
	positive regulation of lipid localization (GO:1905954)	44238	0.224117	0.582232	0	0	2.50796	3.75086	ZC3H12A;NFKB1	.
	positive regulation of myelination (GO:0031643)	44238	0.224117	0.582232	0	0	2.50796	3.75086	EGR2;TPPP	.
	positive regulation of neuroblast proliferation (GO:0002052)	44238	0.224117	0.582232	0	0	2.50796	3.75086	CTNNB1;VEGFA	.
	positive regulation of sphingolipid biosynthetic process (GO:0090154)	44238	0.224117	0.582232	0	0	2.50796	3.75086	SMPD2;TNF	.
	positive regulation of transcription elongation from RNA polymerase II promoter (GO:0032968)	44238	0.224117	0.582232	0	0	2.50796	3.75086	ELL;CDK12	.
	positive regulation of triglyceride biosynthetic process (GO:0010867)	44238	0.224117	0.582232	0	0	2.50796	3.75086	NR1H2;LDLR	.
	protein kinase C-activating G protein-coupled receptor signaling pathway (GO:0007205)	44238	0.224117	0.582232	0	0	2.50796	3.75086	DGKD;DGKH	.
	regulation of CD4-positive, alpha-beta T cell proliferation (GO:2000561)	44238	0.224117	0.582232	0	0	2.50796	3.75086	XCL1;CD55	.
	regulation of ERAD pathway (GO:1904292)	44238	0.224117	0.582232	0	0	2.50796	3.75086	USP13;HERPUD1	.
	regulation of lamellipodium morphogenesis (GO:2000392)	44238	0.224117	0.582232	0	0	2.50796	3.75086	ENPP2;CD44	.
	regulation of mitochondrial fusion (GO:0010635)	44238	0.224117	0.582232	0	0	2.50796	3.75086	PRKN;TFRC	.
	regulation of mRNA 3'-end processing (GO:0031440)	44238	0.224117	0.582232	0	0	2.50796	3.75086	BARD1;PAF1	.
	regulation of T cell mediated immunity (GO:0002709)	44238	0.224117	0.582232	0	0	2.50796	3.75086	IL1B;ZBTB1	.
	response to hydroxyurea (GO:0072710)	44238	0.224117	0.582232	0	0	2.50796	3.75086	NSMCE3;KAT7	.
	UDP-N-acetylglucosamine biosynthetic process (GO:0006048)	44238	0.224117	0.582232	0	0	2.50796	3.75086	PGM3;UAP1	.
	urate metabolic process (GO:0046415)	44238	0.224117	0.582232	0	0	2.50796	3.75086	PRPS1;PNP	.
	regulation of ERK1 and ERK2 cascade (GO:0070372)	23/238	0.22438	0.582232	0	0	1.20938	1.80732	DUSP4;PTPN1;CCL3L1;CCL20;C5AR1;BRAF;TNF;ICAM1;DSTYK;DUSP10;GPR183;IL1B;PRXL2C;CCL4;CCL3;TIMP3;XCL1;SPRY2;SPRY1;EZR;FAM83D;PDE8A;CD44	.
	artery morphogenesis (GO:0048844)	44316	0.225061	0.582232	0	0	1.7368	2.59024	JAG1;HES1;SMAD7;VEGFA	.
	Golgi to plasma membrane protein transport (GO:0043001)	44316	0.225061	0.582232	0	0	1.7368	2.59024	GOLGA4;SYS1;KRT18;VAMP2	.
	maintenance of blood-brain barrier (GO:0035633)	44316	0.225061	0.582232	0	0	1.7368	2.59024	SLC12A2;IL6;LAMC1;JAM3	.
	mRNA splice site selection (GO:0006376)	44316	0.225061	0.582232	0	0	1.7368	2.59024	SF3A1;YTHDC1;SRSF6;SF1	.
	negative regulation of interleukin-1 production (GO:0032692)	44316	0.225061	0.582232	0	0	1.7368	2.59024	IL10;ZC3H12A;TNFAIP3;NLRP3	.
	positive regulation of B cell proliferation (GO:0030890)	44316	0.225061	0.582232	0	0	1.7368	2.59024	TFRC;CLCF1;GPR183;IRS2	.
	positive regulation of protein import (GO:1904591)	44316	0.225061	0.582232	0	0	1.7368	2.59024	BAG3;ZC3H12A;PIK3R1;ZPR1	.
	regulation of long-term synaptic potentiation (GO:1900271)	44316	0.225061	0.582232	0	0	1.7368	2.59024	EPHA4;ARC;ABL1;LGMN	.
	regulation of macrophage activation (GO:0043030)	44316	0.225061	0.582232	0	0	1.7368	2.59024	IL6;SPHK1;ZC3H12A;THBS1	.
	regulation of natural killer cell mediated cytotoxicity (GO:0042269)	44316	0.225061	0.582232	0	0	1.7368	2.59024	KLRK1;AP1G1;CRTAM;IL12A	.
	regulation of type I interferon-mediated signaling pathway (GO:0060338)	44316	0.225061	0.582232	0	0	1.7368	2.59024	PTPN1;HSP90AB1;YTHDF3;NLRC5	.
	response to light stimulus (GO:0009416)	22463	0.226375	0.585289	0	0	1.46389	2.17469	UBE2B;CRY2;CRY1;ERCC5;CLOCK;DTL;MAP4K3	.
	cell morphogenesis involved in differentiation (GO:0000904)	26512	0.230573	0.59475	0	0	1.41171	2.07123	EFNA1;FER;RILPL2;ARL13B;LAMB3;LAMC1;PIK3R1;ATF4	.
	cytoskeleton-dependent cytokinesis (GO:0061640)	26512	0.230573	0.59475	0	0	1.41171	2.07123	RASA1;KIF4A;STMN1;CKAP2;SPIRE2;TRIM36;MYH10;TTC19	.
	Fc-gamma receptor signaling pathway (GO:0038094)	26512	0.230573	0.59475	0	0	1.41171	2.07123	CYFIP2;NCKAP1;HSP90AB1;YES1;PIK3CA;ABL1;WASL;PIK3R1	.
	positive regulation of protein secretion (GO:0050714)	26512	0.230573	0.59475	0	0	1.41171	2.07123	HCAR2;IL1A;TCF7L2;IRS2;EZR;MYH10;ABCG1;TTN	.
	regulation of G2/M transition of mitotic cell cycle (GO:0010389)	15/149	0.232227	0.598665	0	0	1.26484	1.84672	HAUS6;CDC25C;TUBB4B;TUBA4A;GPR132;CENPF;TUBA1A;CCND1;AKAP9;PSME4;CDK1;DTL;CEP43;YWHAG;CLASP1	.
	inositol lipid-mediated signaling (GO:0048017)	18780	0.233127	0.600284	0	0	1.50552	2.19231	PIK3CA;PLCL1;IRS2;PIK3R1;EZR;OGT	.
	mitotic metaphase plate congression (GO:0007080)	18780	0.233127	0.600284	0	0	1.50552	2.19231	EML4;KIF18A;CHMP1B;CDCA5;MIS12;CENPC	.
	negative regulation of cell death (GO:0060548)	34608	0.234415	0.60325	0	0	1.34467	1.95066	PRKN;INPP5A;CSF1;PDE12;ADNP2;SRSF6;CD34;PDE8A;HSPA1B;HSPA1A	.
	nucleotide-excision repair (GO:0006289)	11/105	0.234924	0.604207	0	0	1.32188	1.91473	POLA1;UBB;POLR2A;CCNH;UBC;RPA4;EP300;ERCC5;MNAT1;SIRT1;RNF111	.
	carboxylic acid transmembrane transport (GO:1905039)	15097	0.239092	0.613093	0	0	1.56806	2.24375	SLC5A6;SLC7A5;SLC25A30;SLC16A7;SLC38A2	.
	regulation of G0 to G1 transition (GO:0070316)	15097	0.239092	0.613093	0	0	1.56806	2.24375	RYBP;TFDP2;E2F1;FOXO4;PHC3	.
	response to growth factor (GO:0070848)	15097	0.239092	0.613093	0	0	1.56806	2.24375	ACVR1C;SPHK1;CTNNB1;EMD;ACVR2B	.
	regulation of cellular component organization (GO:0051128)	14/139	0.241549	0.613093	0	0	1.26536	1.79767	HSPA8;PTPN1;EGLN2;TFRC;SPHK1;HJURP;TNF;ERMN;NET1;RUFY2;ABL1;ABL2;PRKCQ;MELTF	.
	beta-catenin destruction complex disassembly (GO:1904886)	44276	0.241973	0.613093	0	0	1.8812	2.66929	FZD5;CTNNB1;WNT1	.
	cellular response to steroid hormone stimulus (GO:0071383)	44276	0.241973	0.613093	0	0	1.8812	2.66929	ATP1A1;TFPI;NKX3-1	.
	focal adhesion assembly (GO:0048041)	44276	0.241973	0.613093	0	0	1.8812	2.66929	DLC1;TESK2;SORBS1	.
	mitotic spindle assembly checkpoint signaling (GO:0007094)	44276	0.241973	0.613093	0	0	1.8812	2.66929	CDC20;CENPF;TRIP13	.
	mitotic spindle checkpoint signaling (GO:0071174)	44276	0.241973	0.613093	0	0	1.8812	2.66929	CDC20;CENPF;TRIP13	.
	negative regulation of cell communication (GO:0010648)	44276	0.241973	0.613093	0	0	1.8812	2.66929	PTPN1;IL1B;OSM	.
	negative regulation of reproductive process (GO:2000242)	44276	0.241973	0.613093	0	0	1.8812	2.66929	ACVR1C;TIMP1;NKX3-1	.
	negative regulation of response to wounding (GO:1903035)	44276	0.241973	0.613093	0	0	1.8812	2.66929	EPHA4;SERPINE1;CASK	.
	negative regulation of small GTPase mediated signal transduction (GO:0051058)	44276	0.241973	0.613093	0	0	1.8812	2.66929	SPRY2;SPRY1;ARHGAP12	.
	neuron apoptotic process (GO:0051402)	44276	0.241973	0.613093	0	0	1.8812	2.66929	DIABLO;SIAH1;TNFRSF21	.
	nuclear envelope organization (GO:0006998)	44276	0.241973	0.613093	0	0	1.8812	2.66929	SPAG4;NEMP1;EMD	.
	nuclear-transcribed mRNA poly(A) tail shortening (GO:0000289)	44276	0.241973	0.613093	0	0	1.8812	2.66929	ZFP36;CNOT6L;SAMD4B	.
	positive regulation of lipid storage (GO:0010884)	44276	0.241973	0.613093	0	0	1.8812	2.66929	ZC3H12A;PLIN2;NFKB1	.
	purinergic nucleotide receptor signaling pathway (GO:0035590)	44276	0.241973	0.613093	0	0	1.8812	2.66929	HSP90AB1;IL1B;NLRP3	.
	regulation of fibroblast migration (GO:0010762)	44276	0.241973	0.613093	0	0	1.8812	2.66929	HAS1;THBS1;APPL2	.
	regulation of lipid catabolic process (GO:0050994)	44276	0.241973	0.613093	0	0	1.8812	2.66929	HCAR2;IL1B;TNF	.
	response to glucagon (GO:0033762)	44276	0.241973	0.613093	0	0	1.8812	2.66929	CYSLTR2;PRKAR2A;CRY1	.
	spindle assembly checkpoint signaling (GO:0071173)	44276	0.241973	0.613093	0	0	1.8812	2.66929	CDC20;CENPF;TRIP13	.
	sterol transport (GO:0015918)	44276	0.241973	0.613093	0	0	1.8812	2.66929	NPC1;OSBP;LDLR	.
	stress granule assembly (GO:0034063)	44276	0.241973	0.613093	0	0	1.8812	2.66929	DDX6;DDX3X;YTHDF3	.
	granulocyte chemotaxis (GO:0071621)	26877	0.241988	0.613093	0	0	1.38991	1.9721	CCL3L1;CCL20;CCL4;PDE4B;CCL3;XCL1;CXCL3;CXCL2	.
	insulin receptor signaling pathway (GO:0008286)	26877	0.241988	0.613093	0	0	1.38991	1.9721	FER;PIK3CA;NAMPT;GAB1;IRS2;FOXO4;PIK3R1;SORBS1	.
	negative regulation of response to DNA damage stimulus (GO:2001021)	11414	0.243094	0.614484	0	0	1.67239	2.36527	MDM2;SNAI1;SIRT1;CD44	.
	positive regulation of mononuclear cell migration (GO:0071677)	11414	0.243094	0.614484	0	0	1.67239	2.36527	SERPINE1;IL12A;TNF;LGMN	.
	positive regulation of proteolysis involved in cellular protein catabolic process (GO:1903052)	11414	0.243094	0.614484	0	0	1.67239	2.36527	PRKN;BAG2;RNF139;SMURF1	.
	positive regulation of Rho protein signal transduction (GO:0035025)	11414	0.243094	0.614484	0	0	1.67239	2.36527	NET1;P2RY10;GPR35;GPR18	.
	post-translational protein modification (GO:0043687)	32/345	0.245207	0.61947	0	0	1.15603	1.62498	RAB3A;CSF1;DCUN1D3;KLHL11;LAMC1;DCAF4;HIF1A;FBXO41;ANKRD9;SOCS3;UBXN7;FEM1C;TIMP1;CHML;FBXW8;KLHL25;FEM1A;KLHL21;KLHL2;FBXO32;CKAP4;KLHL20;IL6;KBTBD6;GAN;MGAT4A;PSME4;MELTF;OBSL1;KBTBD8;DTL;ASB3	.
	amide biosynthetic process (GO:0043604)	19146	0.246908	0.622344	0	0	1.47272	2.05994	SMPD2;SLC25A15;ARG2;SAMD8;SGMS1;CLN8	.
	negative regulation of protein metabolic process (GO:0051248)	19146	0.246908	0.622344	0	0	1.47272	2.05994	HSP90AB1;CYP51A1;PTX3;LDLR;AZIN1;NFKB1	.
	positive regulation of protein localization to plasma membrane (GO:1903078)	19146	0.246908	0.622344	0	0	1.47272	2.05994	CNST;PRKCH;PIK3R1;SORBS1;TNF;PLS1	.
	response to peptide hormone (GO:0043434)	19146	0.246908	0.622344	0	0	1.47272	2.05994	EPM2AIP1;XBP1;CRY1;TSC1;SIRT1;OGT	.
	neuron projection morphogenesis (GO:0048812)	14/140	0.249826	0.626405	0	0	1.25525	1.74102	NCKAP1;FARP1;RAB3A;RYK;LMTK2;WASL;CELSR2;KLF7;ARC;UBB;ALS2;MAP1A;CTNNB1;NBL1	.
	transcription initiation from RNA polymerase II promoter (GO:0006367)	14/140	0.249826	0.626405	0	0	1.25525	1.74102	CREBBP;CCNH;MAML1;TAF13;NR1H2;RORA;NR1D2;MED26;NR4A2;MED23;NR4A1;NR4A3;POLR2A;MNAT1	.
	transmembrane receptor protein tyrosine kinase signaling pathway (GO:0007169)	37/404	0.250041	0.626405	0	0	1.14015	1.5804	CYFIP2;NCKAP1;FLT1;CSF1;SLA;NEDD9;IRS2;FOXO4;PIK3R1;WASL;FGFRL1;FGF9;POLR2A;NAMPT;STMN1;EPHA4;YES1;RYK;MMP2;EIF2AK3;GAB1;LMTK2;SORBS1;MMP9;MTSS1;VEGFA;EFNA1;AHI1;FER;NR4A3;PIK3CA;AXL;RASA1;DDIT4;MAPKAPK2;CASS4;MET	.
	amyloid fibril formation (GO:1990000)	23193	0.25129	0.626405	0	0	1.41145	1.94942	PRKN;UBB;SIAH2;UBC;SIAH1;H4-16;MDM2	.
	anterior/posterior pattern specification (GO:0009952)	23193	0.25129	0.626405	0	0	1.41145	1.94942	BASP1;DDIT3;BHLHE40;HES1;CELSR2;ACVR2B;HES4	.
	negative regulation of endopeptidase activity (GO:0010951)	23193	0.25129	0.626405	0	0	1.41145	1.94942	SPINK2;SERPINB2;SERPINE2;SERPINE1;TIMP3;SERPINB9;TIMP1	.
	cellular response to insulin stimulus (GO:0032869)	13/129	0.25148	0.626405	0	0	1.26598	1.74755	XBP1;INSIG1;SYAP1;GAB1;IRS2;FOXO4;PIK3R1;SORBS1;FER;NAMPT;CPEB2;SLC25A33;VAMP2	.
	DNA-dependent DNA replication (GO:0006261)	13/129	0.25148	0.626405	0	0	1.26598	1.74755	RPAIN;GMNN;GINS4;DDX21;CDC6;POLA1;ORC6;POLG2;UBB;PSME4;UBC;RPA4;MCM6	.
	ceramide biosynthetic process (GO:0046513)	15462	0.254761	0.626405	0	0	1.5256	2.08615	SMPD2;SAMD8;SGMS1;CLN8;ST6GALNAC6	.
	negative regulation of protein catabolic process (GO:0042177)	15462	0.254761	0.626405	0	0	1.5256	2.08615	IL10;CYP51A1;TIMP3;TIMP1;AZIN1	.
	amino sugar biosynthetic process (GO:0046349)	44239	0.255328	0.626405	0	0	2.25704	3.08132	PGM3;UAP1	.
	attachment of mitotic spindle microtubules to kinetochore (GO:0051315)	44239	0.255328	0.626405	0	0	2.25704	3.08132	MIS12;CENPC	.
	axonal fasciculation (GO:0007413)	44239	0.255328	0.626405	0	0	2.25704	3.08132	EPHA4;ARHGAP35	.
	cardiocyte differentiation (GO:0035051)	44239	0.255328	0.626405	0	0	2.25704	3.08132	KDM6B;SIK1	.
	cellular response to nitrogen levels (GO:0043562)	44239	0.255328	0.626405	0	0	2.25704	3.08132	GABARAPL1;MAP1LC3A	.
	cellular response to nitrogen starvation (GO:0006995)	44239	0.255328	0.626405	0	0	2.25704	3.08132	GABARAPL1;MAP1LC3A	.
	double-strand break repair via break-induced replication (GO:0000727)	44239	0.255328	0.626405	0	0	2.25704	3.08132	GINS4;MCM6	.
	eye photoreceptor cell differentiation (GO:0001754)	44239	0.255328	0.626405	0	0	2.25704	3.08132	PROM1;VEGFA	.
	hemidesmosome assembly (GO:0031581)	44239	0.255328	0.626405	0	0	2.25704	3.08132	LAMB3;LAMC1	.
	histone H3-K9 demethylation (GO:0033169)	44239	0.255328	0.626405	0	0	2.25704	3.08132	KDM3A;JMJD1C	.
	intrinsic apoptotic signaling pathway in response to oxidative stress (GO:0008631)	44239	0.255328	0.626405	0	0	2.25704	3.08132	DIABLO;ZNF622	.
	maintenance of protein localization in endoplasmic reticulum (GO:0035437)	44239	0.255328	0.626405	0	0	2.25704	3.08132	INSIG1;TAPT1	.
	mitotic nuclear membrane disassembly (GO:0007077)	44239	0.255328	0.626405	0	0	2.25704	3.08132	CCNB2;CDK1	.
	negative regulation of cellular response to vascular endothelial growth factor stimulus (GO:1902548)	44239	0.255328	0.626405	0	0	2.25704	3.08132	SPRY2;IL12A	.
	negative regulation of cilium assembly (GO:1902018)	44239	0.255328	0.626405	0	0	2.25704	3.08132	LIMK2;CEP97	.
	negative regulation of gene silencing by miRNA (GO:0060965)	44239	0.255328	0.626405	0	0	2.25704	3.08132	ZC3H12A;TNF	.
	negative regulation of glucose transmembrane transport (GO:0010829)	44239	0.255328	0.626405	0	0	2.25704	3.08132	IL1B;APPL2	.
	negative regulation of heart contraction (GO:0045822)	44239	0.255328	0.626405	0	0	2.25704	3.08132	PDE4D;ZC3H12A	.
	negative regulation of histone acetylation (GO:0035067)	44239	0.255328	0.626405	0	0	2.25704	3.08132	ZNF451;SIRT1	.
	negative regulation of JUN kinase activity (GO:0043508)	44239	0.255328	0.626405	0	0	2.25704	3.08132	DNAJA1;DUSP10	.
	P-body assembly (GO:0033962)	44239	0.255328	0.626405	0	0	2.25704	3.08132	DDX6;RC3H1	.
	phosphate ion transmembrane transport (GO:0035435)	44239	0.255328	0.626405	0	0	2.25704	3.08132	SLC20A1;SLC25A30	.
	positive regulation of cellular senescence (GO:2000774)	44239	0.255328	0.626405	0	0	2.25704	3.08132	ARG2;SIRT1	.
	positive regulation of fatty acid oxidation (GO:0046321)	44239	0.255328	0.626405	0	0	2.25704	3.08132	NR4A3;IRS2	.
	positive regulation of leukocyte proliferation (GO:0070665)	44239	0.255328	0.626405	0	0	2.25704	3.08132	CSF1;IL12A	.
	posttranslational protein targeting to endoplasmic reticulum membrane (GO:0006620)	44239	0.255328	0.626405	0	0	2.25704	3.08132	SEC61A2;SGTB	.
	protein mono-ADP-ribosylation (GO:0140289)	44239	0.255328	0.626405	0	0	2.25704	3.08132	TIPARP;PARP8	.
	purine nucleotide biosynthetic process (GO:0006164)	44239	0.255328	0.626405	0	0	2.25704	3.08132	PRPS1;AMPD2	.
	pyrimidine nucleobase metabolic process (GO:0006206)	44239	0.255328	0.626405	0	0	2.25704	3.08132	DPYSL4;CTPS1	.
	regulation of actin filament depolymerization (GO:0030834)	44239	0.255328	0.626405	0	0	2.25704	3.08132	PIK3CA;CFL2	.
	regulation of cholesterol esterification (GO:0010872)	44239	0.255328	0.626405	0	0	2.25704	3.08132	STARD4;ABCG1	.
	regulation of DNA-dependent DNA replication (GO:0090329)	44239	0.255328	0.626405	0	0	2.25704	3.08132	GMNN;KAT7	.
	regulation of feeding behavior (GO:0060259)	44239	0.255328	0.626405	0	0	2.25704	3.08132	NR4A3;CFAP20	.
	regulation of hemopoiesis (GO:1903706)	44239	0.255328	0.626405	0	0	2.25704	3.08132	CREBBP;MAFB	.
	regulation of histone H3-K9 methylation (GO:0051570)	44239	0.255328	0.626405	0	0	2.25704	3.08132	JARID2;SIRT1	.
	regulation of nucleobase-containing compound metabolic process (GO:0019219)	44239	0.255328	0.626405	0	0	2.25704	3.08132	RASA1;PCBP2	.
	regulation of vascular associated smooth muscle cell migration (GO:1904752)	44239	0.255328	0.626405	0	0	2.25704	3.08132	NR4A3;FGF9	.
	replicative senescence (GO:0090399)	44239	0.255328	0.626405	0	0	2.25704	3.08132	SERPINE1;ATR	.
	plasma membrane bounded cell projection assembly (GO:0120031)	26/278	0.258207	0.633117	0	0	1.1662	1.57903	PTPDC1;IFT74;CFAP298;ARL13B;KIF3A;TCTN2;TMEM67;CFAP20;EXOC8;DNAAF1;WDR19;EMP1;FOXJ1;BBIP1;DYNLL2;MTSS1;TMEM231;AHI1;RILPL2;MAK;SPATA13;FSCN1;WDPCP;B9D2;EZR;IFT46	.
	protein glycosylation (GO:0006486)	13/130	0.260252	0.636787	0	0	1.25509	1.68948	ALG9;B4GALT1;POMGNT2;FUT8;B3GNT7;NPC1;MGAT4A;TET3;PGM3;SLC39A8;ST3GAL1;OGT;FKTN	.
	positive regulation of NIK/NF-kappaB signaling (GO:1901224)	19511	0.260915	0.636787	0	0	1.4413	1.93648	DDX3X;IL23A;SPHK1;IL1B;EP300;TNF	.
	7-methylguanosine mRNA capping (GO:0006370)	11780	0.261434	0.636787	0	0	1.61257	2.16338	POLR2A;CCNH;RNMT;MNAT1	.
	7-methylguanosine RNA capping (GO:0009452)	11780	0.261434	0.636787	0	0	1.61257	2.16338	POLR2A;CCNH;RNMT;MNAT1	.
	metal ion export (GO:0070839)	11780	0.261434	0.636787	0	0	1.61257	2.16338	KCNK5;KCNE1;ATP1A1;ATP1B1	.
	negative regulation of developmental growth (GO:0048640)	11780	0.261434	0.636787	0	0	1.61257	2.16338	CDKN1A;CDKN1B;DUSP10;WWC2	.
	positive regulation of receptor signaling pathway via STAT (GO:1904894)	11780	0.261434	0.636787	0	0	1.61257	2.16338	IL10;IL6;HES1;TNF	.
	regulation of cell migration involved in sprouting angiogenesis (GO:0090049)	11780	0.261434	0.636787	0	0	1.61257	2.16338	AKT3;PTGS2;THBS1;VEGFA	.
	regulation of cell morphogenesis (GO:0022604)	11780	0.261434	0.636787	0	0	1.61257	2.16338	ZRANB1;ARC;PDZD8;CD44	.
	regulation of dendrite morphogenesis (GO:0048814)	11780	0.261434	0.636787	0	0	1.61257	2.16338	CDKL5;FBXW8;SS18L1;OBSL1	.
	regulation of dendritic spine morphogenesis (GO:0061001)	11780	0.261434	0.636787	0	0	1.61257	2.16338	EFNA1;EPHA4;ARC;LRP8	.
	regulation of intracellular protein transport (GO:0033157)	11780	0.261434	0.636787	0	0	1.61257	2.16338	PLK3;PTPN1;VAMP2;NDEL1	.
	pre-replicative complex assembly (GO:0036388)	23559	0.264046	0.63739	0	0	1.38661	1.84646	ORC6;UBB;GMNN;PSME4;UBC;MCM6;CDC6	.
	tRNA processing (GO:0008033)	23559	0.264046	0.63739	0	0	1.38661	1.84646	QTRT2;PTCD1;CLP1;TRMT6;RPP21;ADAT3;ADAT2	.
	amino acid import (GO:0043090)	44277	0.264569	0.63739	0	0	1.78209	2.36957	SLC25A38;SLC7A5;SLC7A1	.
	cellular response to osmotic stress (GO:0071470)	44277	0.264569	0.63739	0	0	1.78209	2.36957	DDX3X;STK39;YBX3	.
	fatty-acyl-CoA metabolic process (GO:0035337)	44277	0.264569	0.63739	0	0	1.78209	2.36957	SCD;PPT2;ACACA	.
	membrane lipid metabolic process (GO:0006643)	44277	0.264569	0.63739	0	0	1.78209	2.36957	CERK;SPHK1;B4GALT4	.
	metallo-sulfur cluster assembly (GO:0031163)	44277	0.264569	0.63739	0	0	1.78209	2.36957	HSPA9;ISCA1;IBA57	.
	negative regulation of cyclin-dependent protein kinase activity (GO:1904030)	44277	0.264569	0.63739	0	0	1.78209	2.36957	HEXIM1;CDKN1A;CDKN1B	.
	negative regulation of mitotic metaphase/anaphase transition (GO:0045841)	44277	0.264569	0.63739	0	0	1.78209	2.36957	CDC20;CENPF;TRIP13	.
	negative regulation of phosphate metabolic process (GO:0045936)	44277	0.264569	0.63739	0	0	1.78209	2.36957	CDKN1A;CDKN1B;SIRT1	.
	negative regulation of small molecule metabolic process (GO:0062014)	44277	0.264569	0.63739	0	0	1.78209	2.36957	CRY1;EP300;SIK1	.
	osteoclast differentiation (GO:0030316)	44277	0.264569	0.63739	0	0	1.78209	2.36957	FARP2;CSF1;GPR183	.
	positive regulation of axon extension (GO:0045773)	44277	0.264569	0.63739	0	0	1.78209	2.36957	GOLGA4;CDKL5;VEGFA	.
	positive regulation of lipid catabolic process (GO:0050996)	44277	0.264569	0.63739	0	0	1.78209	2.36957	IL1B;IRS2;ABHD5	.
	positive regulation of neural precursor cell proliferation (GO:2000179)	44277	0.264569	0.63739	0	0	1.78209	2.36957	CTNNB1;TOX;VEGFA	.
	proteasomal ubiquitin-independent protein catabolic process (GO:0010499)	44277	0.264569	0.63739	0	0	1.78209	2.36957	ENC1;PSME4;NFE2L2	.
	protein mannosylation (GO:0035268)	44277	0.264569	0.63739	0	0	1.78209	2.36957	CRPPA;POMGNT2;FKTN	.
	regulation of execution phase of apoptosis (GO:1900117)	44277	0.264569	0.63739	0	0	1.78209	2.36957	DLC1;ZC3H12A;TP53BP2	.
	regulation of macrophage chemotaxis (GO:0010758)	44277	0.264569	0.63739	0	0	1.78209	2.36957	CSF1;MTUS1;THBS1	.
	regulation of voltage-gated calcium channel activity (GO:1901385)	44277	0.264569	0.63739	0	0	1.78209	2.36957	AHNAK;GPR35;PDE4B	.
	positive regulation of immune response (GO:0050778)	27607	0.265355	0.638577	0	0	1.34827	1.78874	IL10;TASL;AKIRIN2;XBP1;IL23A;NLRP3;SIRT1;EREG	.
	positive regulation of endothelial cell migration (GO:0010595)	31656	0.265495	0.638577	0	0	1.31991	1.75041	AKT3;ZC3H12A;ABL1;SIRT1;MET;HIF1A;THBS1;VEGFA;LGMN	.
	regulation of neuron death (GO:1901214)	31656	0.265495	0.638577	0	0	1.31991	1.75041	PRKN;INPP5A;EGLN2;CSF1;UBB;DDIT4;RRAS2;TSC1;CD34	.
	heart looping (GO:0001947)	15827	0.270669	0.649959	0	0	1.48537	1.94116	AHI1;STIL;SRF;DNAAF1;DLL1	.
	natural killer cell activation (GO:0030101)	15827	0.270669	0.649959	0	0	1.48537	1.94116	KLRK1;AXL;KAT7;TOX;ULBP2	.
	regulation of cell-cell adhesion (GO:0022407)	15827	0.270669	0.649959	0	0	1.48537	1.94116	AFDN;JAG1;WNT1;CELSR2;SMAD7	.
	macroautophagy (GO:0016236)	12/120	0.271421	0.651409	0	0	1.25493	1.63654	ILRUN;PRKN;UVRAG;GABARAPL1;MAP1LC3A;ATG101;ATG16L1;RUBCNL;VPS37C;YOD1;VPS37B;DYNLL2	.
	cytoplasmic microtubule organization (GO:0031122)	19876	0.275123	0.659578	0	0	1.4112	1.8212	PLK3;LIMK2;TUBGCP5;TPPP;EZR;CLASP1	.
	regulation of focal adhesion assembly (GO:0051893)	19876	0.275123	0.659578	0	0	1.4112	1.8212	DLC1;ABL1;TSC1;THBS1;CLASP1;VEGFA	.
	negative regulation of angiogenesis (GO:0016525)	32021	0.276599	0.662056	0	0	1.30292	1.6745	SLC12A2;RGCC;SERPINE1;CTNNB1;SPRY2;FOXO4;TNF;THBS1;KLF2	.
	protein autoubiquitination (GO:0051865)	23924	0.276976	0.662056	0	0	1.36263	1.74938	PRKN;RNF11;UBE2B;AMFR;MDM2;KLHL24;SH3RF1	.
	tRNA modification (GO:0006400)	23924	0.276976	0.662056	0	0	1.36263	1.74938	QTRT2;TRMO;TRMT6;TRMT12;THADA;ADAT3;ADAT2	.
	regulation of BMP signaling pathway (GO:0030510)	27973	0.277279	0.662056	0	0	1.32837	1.70395	SMURF2;SMURF1;BAMBI;WNT1;NBL1;SKIL;ACVR2B;SMAD7	.
	keratan sulfate metabolic process (GO:0042339)	12145	0.280025	0.662056	0	0	1.55688	1.98172	B4GALT1;B3GNT7;ST3GAL1;B4GALT4	.
	muscle cell development (GO:0055001)	12145	0.280025	0.662056	0	0	1.55688	1.98172	NEBL;HES1;TTN;VEGFA	.
	positive regulation of cholesterol transport (GO:0032376)	12145	0.280025	0.662056	0	0	1.55688	1.98172	NFKBIA;NR1H2;GPS2;SIRT1	.
	positive regulation of receptor signaling pathway via JAK-STAT (GO:0046427)	12145	0.280025	0.662056	0	0	1.55688	1.98172	IL10;IL6;HES1;TNF	.
	regulation of protein localization to cell surface (GO:2000008)	12145	0.280025	0.662056	0	0	1.55688	1.98172	HSP90AB1;MAP1A;CTNNB1;TNF	.
	RNA stabilization (GO:0043489)	12145	0.280025	0.662056	0	0	1.55688	1.98172	NOCT;E2F1;NAF1;TENT5C	.
	cellular biogenic amine metabolic process (GO:0006576)	44240	0.286605	0.662056	0	0	2.05174	2.56396	AMD1;ODC1	.
	cellular component maintenance (GO:0043954)	44240	0.286605	0.662056	0	0	2.05174	2.56396	SUPV3L1;MTMR2	.
	central nervous system neuron axonogenesis (GO:0021955)	44240	0.286605	0.662056	0	0	2.05174	2.56396	HSP90AB1;ARHGAP35	.
	chromatin organization involved in regulation of transcription (GO:0034401)	44240	0.286605	0.662056	0	0	2.05174	2.56396	SERTAD1;SERTAD2	.
	cytoplasmic sequestering of protein (GO:0051220)	44240	0.286605	0.662056	0	0	2.05174	2.56396	NFKBIA;NFKBIE	.
	DNA replication-independent nucleosome organization (GO:0034724)	44240	0.286605	0.662056	0	0	2.05174	2.56396	NASP;H4-16	.
	glucan biosynthetic process (GO:0009250)	44240	0.286605	0.662056	0	0	2.05174	2.56396	PER2;PGM2L1	.
	glucose import (GO:0046323)	44240	0.286605	0.662056	0	0	2.05174	2.56396	SLC2A1;SLC2A3	.
	glycogen biosynthetic process (GO:0005978)	44240	0.286605	0.662056	0	0	2.05174	2.56396	PER2;PGM2L1	.
	mitochondrion transport along microtubule (GO:0047497)	44240	0.286605	0.662056	0	0	2.05174	2.56396	UBB;HIF1A	.
	mitotic DNA integrity checkpoint signaling (GO:0044774)	44240	0.286605	0.662056	0	0	2.05174	2.56396	CDC6;CLSPN	.
	negative regulation by host of viral transcription (GO:0043922)	44240	0.286605	0.662056	0	0	2.05174	2.56396	CCL4;CCL3	.
	negative regulation of DNA-dependent DNA replication (GO:2000104)	44240	0.286605	0.662056	0	0	2.05174	2.56396	GMNN;DONSON	.
	negative regulation of intrinsic apoptotic signaling pathway in response to DNA damage by p53 class mediator (GO:1902166)	44240	0.286605	0.662056	0	0	2.05174	2.56396	SIRT1;CD44	.
	negative regulation of mononuclear cell migration (GO:0071676)	44240	0.286605	0.662056	0	0	2.05174	2.56396	WASL;NBL1	.
	negative regulation of myoblast differentiation (GO:0045662)	44240	0.286605	0.662056	0	0	2.05174	2.56396	SRA1;DLL1	.
	negative regulation of myotube differentiation (GO:0010832)	44240	0.286605	0.662056	0	0	2.05174	2.56396	HDAC4;XBP1	.
	negative regulation of nucleocytoplasmic transport (GO:0046823)	44240	0.286605	0.662056	0	0	2.05174	2.56396	BARD1;NUP153	.
	oligosaccharide-lipid intermediate biosynthetic process (GO:0006490)	44240	0.286605	0.662056	0	0	2.05174	2.56396	ALG9;ALG13	.
	positive regulation of calcineurin-mediated signaling (GO:0106058)	44240	0.286605	0.662056	0	0	2.05174	2.56396	STIMATE;TNF	.
	positive regulation of calcineurin-NFAT signaling cascade (GO:0070886)	44240	0.286605	0.662056	0	0	2.05174	2.56396	STIMATE;TNF	.
	positive regulation of calcium-mediated signaling (GO:0050850)	44240	0.286605	0.662056	0	0	2.05174	2.56396	CCL4;CCL3	.
	positive regulation of cellular carbohydrate metabolic process (GO:0010676)	44240	0.286605	0.662056	0	0	2.05174	2.56396	PMAIP1;IRS2	.
	positive regulation of insulin receptor signaling pathway (GO:0046628)	44240	0.286605	0.662056	0	0	2.05174	2.56396	SORBS1;SIRT1	.
	positive regulation of protein acetylation (GO:1901985)	44240	0.286605	0.662056	0	0	2.05174	2.56396	DDX3X;ARNTL	.
	positive regulation of protein exit from endoplasmic reticulum (GO:0070863)	44240	0.286605	0.662056	0	0	2.05174	2.56396	SAR1A;EDEM1	.
	protein neddylation (GO:0045116)	44240	0.286605	0.662056	0	0	2.05174	2.56396	DCUN1D3;DCUN1D2	.
	pteridine-containing compound metabolic process (GO:0042558)	44240	0.286605	0.662056	0	0	2.05174	2.56396	MTHFD1L;PTS	.
	purine nucleotide catabolic process (GO:0006195)	44240	0.286605	0.662056	0	0	2.05174	2.56396	PNP;NUDT15	.
	purine-containing compound catabolic process (GO:0072523)	44240	0.286605	0.662056	0	0	2.05174	2.56396	PNP;NUDT15	.
	purine-containing compound salvage (GO:0043101)	44240	0.286605	0.662056	0	0	2.05174	2.56396	PNP;AMPD2	.
	regulation of actomyosin structure organization (GO:0110020)	44240	0.286605	0.662056	0	0	2.05174	2.56396	PTGER4;TSC1	.
	regulation of homotypic cell-cell adhesion (GO:0034110)	44240	0.286605	0.662056	0	0	2.05174	2.56396	PLAUR;PRKCQ	.
	regulation of interleukin-5 production (GO:0032674)	44240	0.286605	0.662056	0	0	2.05174	2.56396	PDE4D;TNFRSF21	.
	regulation of leukocyte adhesion to vascular endothelial cell (GO:1904994)	44240	0.286605	0.662056	0	0	2.05174	2.56396	IL6;TNF	.
	regulation of lysosomal lumen pH (GO:0035751)	44240	0.286605	0.662056	0	0	2.05174	2.56396	TASL;CLN5	.
	regulation of oxidoreductase activity (GO:0051341)	44240	0.286605	0.662056	0	0	2.05174	2.56396	ABL1;ABL2	.
	regulation of platelet-derived growth factor receptor signaling pathway (GO:0010640)	44240	0.286605	0.662056	0	0	2.05174	2.56396	CBLB;F3	.
	regulation of protein exit from endoplasmic reticulum (GO:0070861)	44240	0.286605	0.662056	0	0	2.05174	2.56396	SAR1A;INSIG1	.
	regulation of receptor signaling pathway via STAT (GO:1904892)	44240	0.286605	0.662056	0	0	2.05174	2.56396	IL6;HES1	.
	regulation of retrograde protein transport, ER to cytosol (GO:1904152)	44240	0.286605	0.662056	0	0	2.05174	2.56396	EDEM1;YOD1	.
	regulation of T cell differentiation in thymus (GO:0033081)	44240	0.286605	0.662056	0	0	2.05174	2.56396	FOXJ1;TOX	.
	sodium ion export across plasma membrane (GO:0036376)	44240	0.286605	0.662056	0	0	2.05174	2.56396	ATP1A1;ATP1B1	.
	spinal cord development (GO:0021510)	44240	0.286605	0.662056	0	0	2.05174	2.56396	DLL1;ZPR1	.
	tRNA 5'-leader removal (GO:0001682)	44240	0.286605	0.662056	0	0	2.05174	2.56396	RPP21;RPP14	.
	UDP-N-acetylglucosamine metabolic process (GO:0006047)	44240	0.286605	0.662056	0	0	2.05174	2.56396	PGM3;UAP1	.
	UV-damage excision repair (GO:0070914)	44240	0.286605	0.662056	0	0	2.05174	2.56396	POLA1;SIRT1	.
	branching morphogenesis of an epithelial tube (GO:0048754)	16193	0.286782	0.662056	0	0	1.4472	1.8076	CTNNB1;NRARP;MET;NKX3-1;VEGFA	.
	cation transmembrane transport (GO:0098655)	16193	0.286782	0.662056	0	0	1.4472	1.8076	SLC25A38;SLC7A5;SLC3A2;ATP1B1;SLC7A1	.
	positive regulation of receptor-mediated endocytosis (GO:0048260)	16193	0.286782	0.662056	0	0	1.4472	1.8076	AHI1;DGKD;SERPINE1;WASL;VEGFA	.
	response to amyloid-beta (GO:1904645)	16193	0.286782	0.662056	0	0	1.4472	1.8076	EPHA4;MMP2;MMP9;ICAM1;LGMN	.
	regulation of cell motility (GO:2000145)	13/133	0.287181	0.662056	0	0	1.22351	1.5265	HACE1;SERPINE2;EREG;CDK6;FGF9;SPATA13;LMNA;ENPP2;ABL1;ABL2;PKN2;CFAP20;HBEGF	.
	diacylglycerol metabolic process (GO:0046339)	44278	0.287401	0.662056	0	0	1.6929	2.11084	DGKE;DGKD;DGKH	.
	ERK1 and ERK2 cascade (GO:0070371)	44278	0.287401	0.662056	0	0	1.6929	2.11084	PTGER4;CDK1;ZFP36L2	.
	hexose transmembrane transport (GO:0008645)	44278	0.287401	0.662056	0	0	1.6929	2.11084	SLC2A14;SLC2A1;SLC2A3	.
	negative regulation of G protein-coupled receptor signaling pathway (GO:0045744)	44278	0.287401	0.662056	0	0	1.6929	2.11084	STMN1;CRY1;MET	.
	negative regulation of GTPase activity (GO:0034260)	44278	0.287401	0.662056	0	0	1.6929	2.11084	KLRK1;LRCH1;CPEB2	.
	negative regulation of intracellular protein transport (GO:0090317)	44278	0.287401	0.662056	0	0	1.6929	2.11084	BARD1;KCNE1;INSIG1	.
	oligosaccharide biosynthetic process (GO:0009312)	44278	0.287401	0.662056	0	0	1.6929	2.11084	FUT8;B4GALT1;ST6GALNAC6	.
	positive regulation of epithelial cell apoptotic process (GO:1904037)	44278	0.287401	0.662056	0	0	1.6929	2.11084	IL6;RGCC;THBS1	.
	positive regulation of histone acetylation (GO:0035066)	44278	0.287401	0.662056	0	0	1.6929	2.11084	PAXIP1;IL1B;KAT7	.
	regulation of mononuclear cell migration (GO:0071675)	44278	0.287401	0.662056	0	0	1.6929	2.11084	CSF1;THBS1;TNF	.
	regulation of steroid metabolic process (GO:0019218)	44278	0.287401	0.662056	0	0	1.6929	2.11084	RORA;ABCG1;TTC39B	.
	regulation of telomere capping (GO:1904353)	44278	0.287401	0.662056	0	0	1.6929	2.11084	TNKS;PRKCQ;MAP3K4	.
	regulation of toll-like receptor 4 signaling pathway (GO:0034143)	44278	0.287401	0.662056	0	0	1.6929	2.11084	NINJ1;TNFAIP3;APPL2	.
	neutrophil migration (GO:1990266)	28338	0.289344	0.664825	0	0	1.30905	1.62341	CCL3L1;CCL20;CCL4;PDE4B;CCL3;XCL1;CXCL3;CXCL2	.
	positive regulation of type I interferon production (GO:0032481)	28338	0.289344	0.664825	0	0	1.30905	1.62341	CREBBP;DDX3X;RIPK2;IRF1;POLR1C;EP300;CTNNB1;NFKB1	.
	regulation of organelle assembly (GO:1902115)	28338	0.289344	0.664825	0	0	1.30905	1.62341	USP6NL;CYLD;STIL;CDKL5;PLK2;SPICE1;EZR;TBC1D16	.
	ceramide metabolic process (GO:0006672)	20241	0.289506	0.664825	0	0	1.38232	1.7135	SMPD2;SAMD8;CERK;SGMS1;CLN8;ST6GALNAC6	.
	negative regulation of cytokine-mediated signaling pathway (GO:0001960)	20241	0.289506	0.664825	0	0	1.38232	1.7135	IL1RN;IL6;YTHDF3;NR1H2;NLRC5;GPS2	.
	protein sumoylation (GO:0016925)	20241	0.289506	0.664825	0	0	1.38232	1.7135	RANBP2;ZNF451;EGR2;NUP88;NUP153;TOPORS	.
	cellular response to nutrient levels (GO:0031669)	24289	0.290062	0.665065	0	0	1.33946	1.6578	KLF10;HSPA8;XBP1;MAP1LC3A;TSC1;FNIP1;SIRT1	.
	extracellular matrix disassembly (GO:0022617)	24289	0.290062	0.665065	0	0	1.33946	1.6578	EXOC8;MMP2;MMP19;LAMC1;TIMP1;MMP9;CD44	.
	positive regulation of cell death (GO:0010942)	24289	0.290062	0.665065	0	0	1.33946	1.6578	PRR7;CDKN1B;RIPK2;ZC3H12A;DDIT4;TNF;NKX3-1	.
	autophagosome maturation (GO:0097352)	12510	0.29881	0.681937	0	0	1.5049	1.81784	UVRAG;GABARAPL1;MAP1LC3A;RUBCNL	.
	central nervous system neuron differentiation (GO:0021953)	12510	0.29881	0.681937	0	0	1.5049	1.81784	NR4A2;RYK;CTNNB1;TOX	.
	negative regulation of blood vessel endothelial cell migration (GO:0043537)	12510	0.29881	0.681937	0	0	1.5049	1.81784	RGCC;GADD45A;THBS1;TNF	.
	negative regulation of mitochondrion organization (GO:0010823)	12510	0.29881	0.681937	0	0	1.5049	1.81784	PRKN;TFRC;PPIF;HSPA1A	.
	organelle disassembly (GO:1903008)	12510	0.29881	0.681937	0	0	1.5049	1.81784	PLK3;DYRK3;CDK1;PELO	.
	positive regulation of DNA binding (GO:0043388)	12510	0.29881	0.681937	0	0	1.5049	1.81784	PRKN;PLAUR;HES1;MMP9	.
	regulation of amyloid-beta formation (GO:1902003)	12510	0.29881	0.681937	0	0	1.5049	1.81784	EFNA1;EPHA4;TNF;ABCG1	.
	regulation of cell adhesion mediated by integrin (GO:0033628)	12510	0.29881	0.681937	0	0	1.5049	1.81784	EFNA1;PLAU;SERPINE1;JAM3	.
	response to steroid hormone (GO:0048545)	12510	0.29881	0.681937	0	0	1.5049	1.81784	ATP1A1;TFPI;THBS1;NKX3-1	.
	second-messenger-mediated signaling (GO:0019932)	32752	0.299183	0.682081	0	0	1.27021	1.53276	DGKD;INPP5A;SPHK1;CCRL2;CXCR5;CCL3;EIF2AK3;CXCR4;PPP1R9A	.
	transforming growth factor beta receptor signaling pathway (GO:0007179)	32752	0.299183	0.682081	0	0	1.27021	1.53276	PARD6A;UBB;SMURF1;BAMBI;UBC;LRRC32;SIRT1;APPL2;SMAD7	.
	cellular response to organic substance (GO:0071310)	12/123	0.300002	0.683595	0	0	1.22081	1.46982	NCOA2;ACVR1C;TIPARP;NCOA3;SPHK1;IL1B;CCL3;CXCR4;CTNNB1;TNF;EMD;ACVR2B	.
	negative regulation of T cell activation (GO:0050868)	16558	0.303064	0.687389	0	0	1.41095	1.6844	IL10;IL4I1;SDC4;PAG1;TNFRSF21	.
	regulation of DNA repair (GO:0006282)	16558	0.303064	0.687389	0	0	1.41095	1.6844	H2AX;BABAM2;RADX;KAT7;SIRT1	.
	zymogen activation (GO:0031638)	16558	0.303064	0.687389	0	0	1.41095	1.6844	CYFIP2;PLAU;RIPK2;PERP;LGMN	.
	protein-containing complex subunit organization (GO:0043933)	11/112	0.303636	0.687389	0	0	1.22979	1.46582	CREBBP;WDR19;MDM2;SLC2A1;HES1;LAMC1;WASL;TRAF1;KIFAP3;MNAT1;VAMP2	.
	regulation of macroautophagy (GO:0016241)	11/112	0.303636	0.687389	0	0	1.22979	1.46582	ERN1;USP36;SESN3;EXOC8;PIK3CA;ATG101;SESN2;MTMR8;TSC1;SNX32;SIRT1	.
	autophagosome organization (GO:1905037)	20607	0.30404	0.687389	0	0	1.3546	1.61278	GABARAPL1;MAP1LC3A;ATG101;ATG16L1;TP53INP2;TP53INP1	.
	blood vessel morphogenesis (GO:0048514)	20607	0.30404	0.687389	0	0	1.3546	1.61278	FLT1;RASA1;ADM;HES1;SMAD7;VEGFA	.
	peptidyl-tyrosine modification (GO:0018212)	20607	0.30404	0.687389	0	0	1.3546	1.61278	EPHA4;TPST1;FER;FLT1;ABL1;ABL2	.
	positive regulation of interleukin-1 beta production (GO:0032731)	20607	0.30404	0.687389	0	0	1.3546	1.61278	IL6;FZD5;RIPK2;CCL3;NLRP3;TNF	.
	amino acid import across plasma membrane (GO:0089718)	44279	0.310372	0.687389	0	0	1.61219	1.88624	SLC7A5;SLC3A2;SLC7A1	.
	carbohydrate biosynthetic process (GO:0016051)	44279	0.310372	0.687389	0	0	1.61219	1.88624	FUT8;B4GALT1;ST6GALNAC6	.
	cardiac muscle cell development (GO:0055013)	44279	0.310372	0.687389	0	0	1.61219	1.88624	OBSL1;TTN;VEGFA	.
	extracellular matrix assembly (GO:0085029)	44279	0.310372	0.687389	0	0	1.61219	1.88624	MFAP4;LAMB3;HAS1	.
	heterochromatin assembly (GO:0031507)	44279	0.310372	0.687389	0	0	1.61219	1.88624	H4-16;BEND3;SIRT1	.
	iron-sulfur cluster assembly (GO:0016226)	44279	0.310372	0.687389	0	0	1.61219	1.88624	HSPA9;ISCA1;IBA57	.
	negative regulation of lipid metabolic process (GO:0045833)	44279	0.310372	0.687389	0	0	1.61219	1.88624	HCAR2;IL1B;TNF	.
	negative regulation of protein depolymerization (GO:1901880)	44279	0.310372	0.687389	0	0	1.61219	1.88624	PIK3CA;ATXN7;CLASP1	.
	negative regulation of synaptic transmission (GO:0050805)	44279	0.310372	0.687389	0	0	1.61219	1.88624	MTMR2;PLK2;IL1B	.
	positive regulation of phospholipase activity (GO:0010518)	44279	0.310372	0.687389	0	0	1.61219	1.88624	GNA13;FLT1;ABL2	.
	positive regulation of viral life cycle (GO:1903902)	44279	0.310372	0.687389	0	0	1.61219	1.88624	AXL;VPS37B;KPNA2	.
	regulation of monooxygenase activity (GO:0032768)	44279	0.310372	0.687389	0	0	1.61219	1.88624	IL1A;IL1B;WASL	.
	regulation of vascular endothelial growth factor receptor signaling pathway (GO:0030947)	44279	0.310372	0.687389	0	0	1.61219	1.88624	PTPN1;IL1B;HIF1A	.
	response to gamma radiation (GO:0010332)	44279	0.310372	0.687389	0	0	1.61219	1.88624	DCUN1D3;MDM2;ATR	.
	wound healing, spreading of cells (GO:0044319)	44279	0.310372	0.687389	0	0	1.61219	1.88624	ARHGAP24;ARHGAP35;CD44	.
	sulfur compound biosynthetic process (GO:0044272)	11/113	0.31387	0.687389	0	0	1.21767	1.411	GSTM2;B4GALT1;GSTO2;B3GNT7;MAT2A;CTH;CSGALNACT2;UST;ST3GAL1;B4GALT4;PAPSS2	.
	organic substance transport (GO:0071702)	13/136	0.314908	0.687389	0	0	1.19347	1.37903	ARRDC4;ATP8A1;ARRDC2;ARRDC3;CLN8;SCAMP5;CENPF;KIF3A;CHMP1B;ABCG1;SLC18A2;VAMP2;SLC19A2	.
	cell junction maintenance (GO:0034331)	44241	0.31773	0.687389	0	0	1.88066	2.15628	PARD6A;MYADM	.
	COPII-coated vesicle cargo loading (GO:0090110)	44241	0.31773	0.687389	0	0	1.88066	2.15628	SEC24B;SAR1A	.
	covalent chromatin modification (GO:0016569)	44241	0.31773	0.687389	0	0	1.88066	2.15628	CHD1;SIRT1	.
	heterochromatin organization (GO:0070828)	44241	0.31773	0.687389	0	0	1.88066	2.15628	SNAI1;SIRT1	.
	low-density lipoprotein particle remodeling (GO:0034374)	44241	0.31773	0.687389	0	0	1.88066	2.15628	LIPC;ABCG1	.
	NAD biosynthesis via nicotinamide riboside salvage pathway (GO:0034356)	44241	0.31773	0.687389	0	0	1.88066	2.15628	NAMPT;PTGS2	.
	negative regulation of cell activation (GO:0050866)	44241	0.31773	0.687389	0	0	1.88066	2.15628	THBD;LDLR	.
	negative regulation of interleukin-12 production (GO:0032695)	44241	0.31773	0.687389	0	0	1.88066	2.15628	IL10;THBS1	.
	negative regulation of mRNA splicing, via spliceosome (GO:0048025)	44241	0.31773	0.687389	0	0	1.88066	2.15628	SRSF6;RBMX	.
	negative regulation of pri-miRNA transcription by RNA polymerase II (GO:1902894)	44241	0.31773	0.687389	0	0	1.88066	2.15628	SRF;NFATC3	.
	nuclear membrane disassembly (GO:0051081)	44241	0.31773	0.687389	0	0	1.88066	2.15628	CCNB2;CDK1	.
	nuclear pore organization (GO:0006999)	44241	0.31773	0.687389	0	0	1.88066	2.15628	AHCTF1;NUP153	.
	nucleoside phosphate catabolic process (GO:1901292)	44241	0.31773	0.687389	0	0	1.88066	2.15628	ENTPD4;NUDT15	.
	positive regulation of alpha-beta T cell differentiation (GO:0046638)	44241	0.31773	0.687389	0	0	1.88066	2.15628	PNP;SOCS1	.
	positive regulation of brown fat cell differentiation (GO:0090336)	44241	0.31773	0.687389	0	0	1.88066	2.15628	METRNL;PTGS2	.
	positive regulation of cellular response to insulin stimulus (GO:1900078)	44241	0.31773	0.687389	0	0	1.88066	2.15628	SORBS1;SIRT1	.
	positive regulation of granulocyte macrophage colony-stimulating factor production (GO:0032725)	44241	0.31773	0.687389	0	0	1.88066	2.15628	IL23A;IL1B	.
	positive regulation of macrophage chemotaxis (GO:0010759)	44241	0.31773	0.687389	0	0	1.88066	2.15628	CSF1;THBS1	.
	positive regulation of potassium ion transmembrane transporter activity (GO:1901018)	44241	0.31773	0.687389	0	0	1.88066	2.15628	AKAP9;ATP1B1	.
	positive regulation of T cell chemotaxis (GO:0010820)	44241	0.31773	0.687389	0	0	1.88066	2.15628	STK39;XCL1	.
	potassium ion export across plasma membrane (GO:0097623)	44241	0.31773	0.687389	0	0	1.88066	2.15628	KCNK5;KCNE1	.
	quinone biosynthetic process (GO:1901663)	44241	0.31773	0.687389	0	0	1.88066	2.15628	COQ10B;COQ10A	.
	regulation of cAMP-dependent protein kinase activity (GO:2000479)	44241	0.31773	0.687389	0	0	1.88066	2.15628	PRKAR2A;SIRT1	.
	regulation of cell projection organization (GO:0031344)	44241	0.31773	0.687389	0	0	1.88066	2.15628	SPRY2;ERMN	.
	regulation of gastrulation (GO:0010470)	44241	0.31773	0.687389	0	0	1.88066	2.15628	PHLDB1;CLASP1	.
	regulation of histone methylation (GO:0031060)	44241	0.31773	0.687389	0	0	1.88066	2.15628	PAF1;JARID2	.
	regulation of intrinsic apoptotic signaling pathway in response to DNA damage by p53 class mediator (GO:1902165)	44241	0.31773	0.687389	0	0	1.88066	2.15628	SIRT1;CD44	.
	regulation of lamellipodium organization (GO:1902743)	44241	0.31773	0.687389	0	0	1.88066	2.15628	FER;CD44	.
	regulation of macrophage cytokine production (GO:0010935)	44241	0.31773	0.687389	0	0	1.88066	2.15628	GPRC5B;SIRT1	.
	regulation of response to endoplasmic reticulum stress (GO:1905897)	44241	0.31773	0.687389	0	0	1.88066	2.15628	NR1H2;EIF2AK3	.
	regulation of retinoic acid receptor signaling pathway (GO:0048385)	44241	0.31773	0.687389	0	0	1.88066	2.15628	ASXL1;KLF2	.
	thymus development (GO:0048538)	44241	0.31773	0.687389	0	0	1.88066	2.15628	ZBTB1;HES1	.
	vasodilation (GO:0042311)	44241	0.31773	0.687389	0	0	1.88066	2.15628	SOD2;KLF2	.
	negative regulation of cell cycle G1/S phase transition (GO:1902807)	12875	0.317737	0.687389	0	0	1.45628	1.66967	CDKN1A;WEE1;CDK6;DCUN1D3	.
[truncated: 2,418 more rows]

## Sheet: brown
Supplementary Table 5: Results of functional enrichment analysis per non-preserved module
BP	Term	Overlap	P-value	Adjusted P-value	Old P-value	Old Adjusted P-value	Odds Ratio	Combined Score	Genes	KEGG	Term	Overlap	P-value	Adjusted P-value	Old P-value	Old Adjusted P-value	Odds Ratio	Combined Score	Genes
	mitochondrial ATP synthesis coupled electron transport (GO:0042775)	24/71	9.44613e-15	3.25797e-11	0	0	10.4084	336.119	COX7B;NDUFA6;NDUFB6;NDUFA12;COX15;NDUFB5;NDUFA4;NDUFB4;NDUFB3;NDUFA1;NDUFC2;NDUFB1;NDUFC1;SDHD;COX6A1;COX6C;COX7C;COX5A;UQCRH;NDUFS6;UQCRQ;NDUFS4;NDUFAB1;COA6	.	Oxidative phosphorylation	37/133	9.3434e-19	2.67221e-16	0	0	7.94655	329.896	ATP6V1A;COX7B;NDUFB6;NDUFA12;COX15;NDUFB5;NDUFB4;COX17;NDUFB3;NDUFB1;COX7A2;COX6A1;COX7C;COX5A;UQCRH;ATP5MG;ATP5ME;ATP5PF;ATP6V0E1;ATP5PD;NDUFA6;ATP5PB;NDUFA4;NDUFA1;NDUFC2;NDUFC1;SDHD;ATP5F1C;COX6C;ATP5F1E;UQCRQ;NDUFS6;NDUFS4;NDUFAB1;ATP6V1B2;ATP5PO;ND1
	aerobic electron transport chain (GO:0019646)	23/70	6.85043e-14	1.18136e-10	0	0	9.96399	302.027	COX7B;NDUFA6;NDUFB6;NDUFA12;COX15;NDUFB5;NDUFA4;NDUFB4;NDUFB3;NDUFA1;NDUFC2;NDUFB1;NDUFC1;SDHD;COX6A1;COX6C;COX7C;COX5A;UQCRH;NDUFS6;UQCRQ;NDUFS4;NDUFAB1	.	Parkinson disease	49/249	1.71604e-17	2.45394e-15	0	0	5.09017	196.5	COX7B;NDUFA12;LRRK2;UBE2L6;COX6A1;COX7C;UBE2L3;PSMD1;APAF1;TUBB;NDUFC2;NDUFC1;SDHD;PSMA5;PSMA6;PSMA3;PSMA4;PSMA2;NDUFS6;NDUFS4;VDAC2;VDAC1;ND1;PSMD14;NDUFB6;NDUFB5;NDUFB4;NDUFB3;NDUFB1;COX7A2;TXN;COX5A;UQCRH;PSMB2;ATP5PF;ATP5PD;NDUFA6;ATP5PB;NDUFA4;NDUFA1;ATP5F1C;COX6C;EIF2S1;ATP5F1E;SEM1;UQCRQ;NDUFAB1;PSMC2;ATP5PO
	neutrophil degranulation (GO:0043312)	60/481	9.95435e-12	1.14442e-08	0	0	2.96218	75.0408	GDI2;HP;PTPRJ;CTSS;LAMP2;PSMD1;PGM2;CPNE3;GYG1;SNAP29;B2M;CTSC;CD53;ACTR2;SERPINB1;APAF1;TUBB;ATP6AP2;NDUFC2;COMMD3;ANO6;RHOA;PSMA5;DYNC1LI1;VAMP7;PSMA2;CD63;CSTB;ASAH1;PSMD14;CLEC12A;MVP;FGL2;MOSPD2;IQGAP1;PSEN1;PLAC8;DSN1;PRDX4;LTA4H;CCT8;CD58;ATP8B4;TMEM30A;IDH1;HSPA6;RAB27A;DNAJC13;ARPC5;PRDX6;DERA;RAB10;ERP44;TSPAN14;RAB14;PSMC2;SLCO4C1;CYSTM1;S100P;NIT2	.	Prion disease	47/273	1.68081e-14	1.60237e-12	0	0	4.30526	136.549	COX7B;PSMD14;NDUFB6;NDUFA12;NDUFB5;NDUFB4;NDUFB3;NDUFB1;COX7A2;COX6A1;COX7C;COX5A;UQCRH;PSMB2;PSMD1;ATP5PF;ATP5PD;NDUFA6;APAF1;ATP5PB;NDUFA4;TUBB;HSPA6;NDUFA1;NDUFC2;NDUFC1;SDHD;ATP5F1C;COX6C;EIF2S1;ATP5F1E;PSMA5;SEM1;PSMA6;PSMA3;PSMA4;PSMA2;UQCRQ;NDUFS6;NDUFAB1;PSMC2;NDUFS4;ATP5PO;VDAC2;VDAC1;ND1;C1QC
	neutrophil activation involved in immune response (GO:0002283)	60/485	1.40799e-11	1.21404e-08	0	0	2.93367	73.3014	GDI2;HP;PTPRJ;CTSS;LAMP2;PSMD1;PGM2;CPNE3;GYG1;SNAP29;B2M;CTSC;CD53;ACTR2;SERPINB1;APAF1;TUBB;ATP6AP2;NDUFC2;COMMD3;ANO6;RHOA;PSMA5;DYNC1LI1;VAMP7;PSMA2;CD63;CSTB;ASAH1;PSMD14;CLEC12A;MVP;FGL2;MOSPD2;IQGAP1;PSEN1;PLAC8;DSN1;PRDX4;LTA4H;CCT8;CD58;ATP8B4;TMEM30A;IDH1;HSPA6;RAB27A;DNAJC13;ARPC5;PRDX6;DERA;RAB10;ERP44;TSPAN14;RAB14;PSMC2;SLCO4C1;CYSTM1;S100P;NIT2	.	Huntington disease	49/306	8.32458e-14	5.95207e-12	0	0	3.94924	118.939	COX7B;NDUFA12;CLTA;COX6A1;COX7C;PSMD1;TGM2;APAF1;TUBB;NDUFC2;NDUFC1;SDHD;PSMA5;PSMA6;PSMA3;PSMA4;PSMA2;NDUFS6;NDUFS4;TBPL1;VDAC2;VDAC1;PPARG;ND1;DCTN5;PSMD14;NDUFB6;NDUFB5;NDUFB4;NDUFB3;NDUFB1;COX7A2;COX5A;UQCRH;PSMB2;ATP5PF;ATP5PD;NDUFA6;ATP5PB;NDUFA4;NDUFA1;ATP5F1C;COX6C;ATP5F1E;SEM1;UQCRQ;NDUFAB1;PSMC2;ATP5PO
	neutrophil mediated immunity (GO:0002446)	60/488	1.82058e-11	1.25583e-08	0	0	2.91263	72.0273	GDI2;HP;PTPRJ;CTSS;LAMP2;PSMD1;PGM2;CPNE3;GYG1;SNAP29;B2M;CTSC;CD53;ACTR2;SERPINB1;APAF1;TUBB;ATP6AP2;NDUFC2;COMMD3;ANO6;RHOA;PSMA5;DYNC1LI1;VAMP7;PSMA2;CD63;CSTB;ASAH1;PSMD14;CLEC12A;MVP;FGL2;MOSPD2;IQGAP1;PSEN1;PLAC8;DSN1;PRDX4;LTA4H;CCT8;CD58;ATP8B4;TMEM30A;IDH1;HSPA6;RAB27A;DNAJC13;ARPC5;PRDX6;DERA;RAB10;ERP44;TSPAN14;RAB14;PSMC2;SLCO4C1;CYSTM1;S100P;NIT2	.	Thermogenesis	40/232	1.46571e-12	8.38385e-11	0	0	4.28766	116.833	COX7B;NDUFB6;NDUFA12;COX15;NDUFB5;NDUFB4;COX17;NDUFB3;NDUFB1;COX7A2;COX6A1;COX7C;COX5A;UQCRH;ACTG1;ATP5MG;COA6;ATP5ME;SMARCE1;ATP5PF;ATP5PD;NDUFA6;ATP5PB;NDUFA4;NDUFA1;NDUFC2;ACSL4;NDUFC1;SDHD;ATP5F1C;COX6C;ATP5F1E;UQCRQ;NDUFS6;NDUFAB1;NDUFS4;ATP5PO;PPARG;ND1;SOS2
	antigen processing and presentation of exogenous peptide antigen via MHC class I, TAP-dependent (GO:0002479)	19/73	9.3321e-10	5.3644e-07	0	0	7.13091	148.269	PDIA3;PSMD14;HLA-A;PSMB8;PSMB9;PSMA5;PSMA6;PSMA3;PSMA4;PSMB2;PSMA2;PSMC2;PSME1;PSMD1;PSME2;CALR;FCGR1A;B2M;VAMP3	.	Alzheimer disease	51/369	8.4749e-12	4.0397e-10	0	0	3.31848	84.6011	COX7B;NDUFA12;COX6A1;COX7C;CASP7;FRAT2;PSMD1;APAF1;TUBB;NDUFC2;NDUFC1;SDHD;PSMA5;PSMA6;PSMA3;PSMA4;PSMA2;NDUFS6;NDUFS4;VDAC2;VDAC1;ND1;PPID;PSMD14;NDUFB6;NDUFB5;NDUFB4;NDUFB3;NDUFB1;COX7A2;PSEN1;COX5A;UQCRH;PSMB2;ATP5PF;ATP5PD;NDUFA6;ATP5PB;NDUFA4;NDUFA1;EIF2AK2;ATP5F1C;COX6C;EIF2S1;ATP5F1E;SEM1;UQCRQ;NDUFAB1;PSMC2;ATP5PO;FAS
	mitochondrial electron transport, NADH to ubiquinone (GO:0006120)	14/39	1.4569e-09	7.17833e-07	0	0	11.3064	230.051	NDUFA6;NDUFB6;NDUFA12;NDUFB5;NDUFA4;NDUFB4;NDUFB3;NDUFA1;NDUFB1;NDUFC2;NDUFC1;NDUFS6;NDUFAB1;NDUFS4	.	Amyotrophic lateral sclerosis	50/364	1.7105e-11	6.98861e-10	0	0	3.29193	81.6123	COX7B;NDUFA12;WDR41;COX6A1;COX7C;ACTG1;CASP1;PSMD1;APAF1;TUBB;NDUFC2;NDUFC1;SDHD;PSMA5;PSMA6;PSMA3;PSMA4;PSMA2;NDUFS6;NDUFS4;VDAC1;ND1;OPTN;DCTN5;PSMD14;NDUFB6;NDUFB5;NDUFB4;NDUFB3;NDUFB1;COX7A2;COX5A;UQCRH;PSMB2;ATP5PF;ATP5PD;NDUFA6;ATP5PB;NDUFA4;NDUFA1;ATP5F1C;COX6C;EIF2S1;ATP5F1E;FIG4;SEM1;UQCRQ;NDUFAB1;PSMC2;ATP5PO
	antigen processing and presentation of exogenous peptide antigen via MHC class I (GO:0042590)	19/78	3.13686e-09	1.35238e-06	0	0	6.52488	127.757	PDIA3;PSMD14;HLA-A;PSMB8;PSMB9;PSMA5;PSMA6;PSMA3;PSMA4;PSMB2;PSMA2;PSMC2;PSME1;PSMD1;PSME2;CALR;FCGR1A;B2M;VAMP3	.	Pathways of neurodegeneration	57/475	1.52771e-10	5.46155e-09	0	0	2.82526	63.8568	COX7B;NDUFA12;LRRK2;WDR41;UBE2L6;COX6A1;COX7C;UBE2L3;CASP7;FRAT2;PSMD1;APAF1;TUBB;NDUFC2;NDUFC1;SDHD;PSMA5;PSMA6;PSMA3;PSMA4;PSMA2;NDUFS6;NDUFS4;VDAC2;ND1;VDAC1;OPTN;PPID;DCTN5;NDUFB6;PSMD14;NDUFB5;NDUFB4;NDUFB3;NDUFB1;COX7A2;PSEN1;COX5A;UQCRH;PSMB2;ATP5PF;NDUFA6;ATP5PD;NDUFA4;ATP5PB;NDUFA1;ATP5F1C;COX6C;EIF2S1;ATP5F1E;FIG4;SEM1;UQCRQ;PSMC2;NDUFAB1;ATP5PO;FAS
	regulation of cellular ketone metabolic process (GO:0010565)	16/64	3.68477e-08	1.34386e-05	0	0	6.73617	115.299	PANK2;PSMD14;SIRT5;PSMB8;PSMB9;PSMA5;PSMA6;PSMA3;PSMA4;PSMB2;PSMA2;PSMC2;PSME1;PSMD1;PSME2;CES1	.	Non-alcoholic fatty liver disease	29/155	2.36644e-10	7.52001e-09	0	0	4.69703	104.107	COX7B;NDUFB6;NDUFA12;NDUFB5;NDUFB4;NDUFB3;NDUFB1;COX7A2;COX6A1;COX7C;COX5A;UQCRH;CDC42;CASP7;JUN;NDUFA6;NDUFA4;NDUFA1;NDUFC2;NDUFC1;SDHD;COX6C;EIF2S1;UQCRQ;NDUFS6;NDUFS4;NDUFAB1;FAS;PPARG
	mitochondrial respiratory chain complex assembly (GO:0033108)	19/90	3.89639e-08	1.34386e-05	0	0	5.41866	92.4457	NDUFA6;NDUFB6;PET100;NDUFA12;NDUFB5;NDUFB4;COX17;NDUFB3;NDUFA1;NDUFC2;NDUFB1;NDUFC1;AIFM1;NDUFS6;SDHAF3;NDUFS4;NDUFAB1;SDHAF4;TMEM126B	.	Diabetic cardiomyopathy	33/203	6.5169e-10	1.86383e-08	0	0	3.96942	83.959	COX7B;NDUFB6;NDUFA12;NDUFB5;NDUFB4;NDUFB3;PTEN;NDUFB1;COX7A2;COX6A1;COX7C;COX5A;UQCRH;ATP5PF;ATP5PD;NDUFA6;ATP5PB;NDUFA4;NDUFA1;NDUFC2;NDUFC1;SDHD;ATP5F1C;COX6C;ATP5F1E;UQCRQ;NDUFS6;NDUFAB1;NDUFS4;ATP5PO;VDAC2;VDAC1;ND1
	negative regulation of cell cycle G2/M phase transition (GO:1902750)	15/57	4.65921e-08	1.46087e-05	0	0	7.21193	121.751	PSMD14;CUL1;PSMB8;RBX1;PSMB9;PSMA5;PSMA6;PSMA3;PSMA4;PSMB2;PSMA2;PSMC2;PSME1;PSMD1;PSME2	.	Proteasome	14/46	1.69365e-08	4.40348e-07	0	0	8.82988	158	PSMD14;PSMB8;PSMB9;PSMA5;SEM1;PSMA6;PSMA3;PSMA4;PSMB2;PSMA2;PSMC2;PSME1;PSMD1;PSME2
	regulation of G2/M transition of mitotic cell cycle (GO:0010389)	24/149	1.6511e-07	4.74555e-05	0	0	3.89748	60.8655	YWHAE;DYNC1I2;PSMD14;CETN2;TUBB;CUL1;CCP110;CDC7;PSMB8;RAB11A;RBX1;HAUS1;PSMB9;PSMA5;TPX2;PSMA6;PSMA3;PSMA4;PSMB2;PSMA2;PSMC2;PSME1;PSMD1;PSME2	.	Phagosome	20/152	3.85943e-05	0.000919831	0	0	3.06138	31.111	ATP6V1A;DYNC1I2;ATP6V0E1;TUBB;HLA-A;CTSS;ACTG1;DYNC1LI1;FCGR3A;SEC61G;LAMP2;MRC1;CANX;ATP6V1B2;CALR;FCGR1A;FCGR2B;TLR4;HLA-DPA1;VAMP3
	negative regulation of mitotic cell cycle phase transition (GO:1901991)	18/92	2.98705e-07	7.92488e-05	0	0	4.91932	73.907	RB1;PSMD14;PTEN;CUL1;PSMB8;RBX1;PSMB9;PSMA5;PSMA6;PSMA3;PSMA4;PSMB2;PSMA2;PSMC2;PSME1;PSMD1;PSME2;E2F7	.	Influenza A	20/172	0.000217858	0.00479288	0	0	2.65576	22.3925	IFNAR2;FDPS;APAF1;STAT1;IFNGR2;IL18;EIF2AK2;EIF2S1;RAB11A;ACTG1;IFIH1;TNFSF10;CASP1;FAS;VDAC1;TLR7;JAK2;TLR4;TLR3;HLA-DPA1
	histone mRNA metabolic process (GO:0008334)	10/28	3.5481e-07	8.38434e-05	0	0	11.1734	165.943	SLBP;TUT7;SSB;ERI1;CPSF3;CPSF2;LSM1;SNRPE;SNRPF;MTPAP	.	Salmonella infection	25/249	0.000389245	0.00795171	0	0	2.25612	17.7135	DYNC1I2;DCTN5;ARPC1A;LY96;TXN;MYL12A;MYL12B;ACTG1;CDC42;CASP7;CASP4;TNFSF10;CASP1;S100A10;ACTR2;JUN;MLKL;TUBB;IL18;ARPC5;RHOA;DYNC1LI1;ARPC3;DYNLRB1;TLR4
	negative regulation of G2/M transition of mitotic cell cycle (GO:0010972)	15/66	3.7873e-07	8.38434e-05	0	0	5.93643	87.7786	PSMD14;CUL1;PSMB8;RBX1;PSMB9;PSMA5;PSMA6;PSMA3;PSMA4;PSMB2;PSMA2;PSMC2;PSME1;PSMD1;PSME2	.	Terpenoid backbone biosynthesis	6/22	0.000452774	0.00863289	0	0	7.51105	57.836	FDPS;NUS1;GGPS1;ACAT1;ZMPSTE24;PCYOX1
	mitochondrial respiratory chain complex I assembly (GO:0032981)	14/58	4.18972e-07	8.38434e-05	0	0	6.41768	94.2466	NDUFA6;NDUFB6;NDUFA12;NDUFB5;NDUFB4;NDUFB3;NDUFA1;NDUFC2;NDUFB1;NDUFC1;NDUFS6;NDUFS4;NDUFAB1;TMEM126B	.	Protein export	6/23	0.000587987	0.0105103	0	0	7.06885	52.5838	SRP19;SPCS2;SPCS1;SEC61G;SRP9;SEC11C
	NADH dehydrogenase complex assembly (GO:0010257)	14/58	4.18972e-07	8.38434e-05	0	0	6.41768	94.2466	NDUFA6;NDUFB6;NDUFA12;NDUFB5;NDUFB4;NDUFB3;NDUFA1;NDUFC2;NDUFB1;NDUFC1;NDUFS6;NDUFS4;NDUFAB1;TMEM126B	.	Protein processing in endoplasmic reticulum	18/171	0.00142292	0.0239386	0	0	2.36937	15.5313	ERO1A;PDIA3;EIF2AK1;HSPA6;SSR3;CUL1;UBE2D1;EIF2AK2;EIF2S1;RBX1;ERLEC1;DAD1;SEC61G;CANX;UBXN8;SSR1;MAN1A1;CALR
	mitochondrial ATP synthesis coupled proton transport (GO:0042776)	8/17	4.3757e-07	8.38434e-05	0	0	17.8481	261.332	ATP5PF;ATP5PD;ATP5PB;ATP5PO;ATP5F1C;ATP5MG;ATP5F1E;ATP5ME	.	Necroptosis	17/159	0.00160902	0.0254253	0	0	2.40992	15.5009	IFNAR2;MLKL;STAT1;IFNGR2;EIF2AK2;MACROH2A2;AIFM1;TNFSF10;CASP1;VDAC2;FAS;VDAC1;JAK2;TLR4;PPID;TLR3;CHMP5
	regulation of cellular amine metabolic process (GO:0033238)	13/51	5.49543e-07	9.97564e-05	0	0	6.89507	99.3868	PSMD14;PSMB8;PSMB9;PSMA5;PSMA6;PSMA3;PSMA4;PSMB2;PSMA2;PSMC2;PSME1;PSMD1;PSME2	.	Epstein-Barr virus infection	20/202	0.00168909	0.0254253	0	0	2.21447	14.1362	RB1;IFNAR2;PDIA3;JUN;PSMD14;APAF1;STAT1;EIF2AK2;CD3G;HLA-A;SEM1;PSMC2;BTK;PSMD1;FAS;E2F2;CALR;CD58;B2M;HLA-DPA1
	DNA-dependent DNA replication (GO:0006261)	21/129	8.06827e-07	0.000139137	0	0	3.93797	55.2503	RFC4;PSMD14;GINS3;RECQL;RPA1;CDC7;PSMB8;PRIMPOL;PSMB9;PSMA5;PSMA6;PSMA3;PSMA4;PSMB2;PSMA2;PSMC2;PSME1;PSMD1;PSME2;MCMBP;SSBP1	.	NOD-like receptor signaling pathway	18/181	0.00267609	0.0367058	0	0	2.22283	13.1667	IFNAR2;YWHAE;JUN;STAT1;IL18;CARD6;TXN;RHOA;IFI16;CASP4;CASP1;VDAC2;VDAC1;CARD16;GBP2;TLR4;GBP1;GBP4
	regulation of cellular amino acid metabolic process (GO:0006521)	13/54	1.11919e-06	0.000183813	0	0	6.38955	87.5554	PSMD14;PSMB8;PSMB9;PSMA5;PSMA6;PSMA3;PSMA4;PSMB2;PSMA2;PSMC2;PSME1;PSMD1;PSME2	.	Measles	15/139	0.00269518	0.0367058	0	0	2.43221	14.3897	IFNAR2;JUN;APAF1;STAT1;EIF2AK1;HSPA6;EIF2AK2;CD3G;EIF2S1;IFIH1;IL2RA;FAS;TLR7;FCGR2B;TLR4
	protein-DNA complex assembly (GO:0065004)	22/143	1.19641e-06	0.000187257	0	0	3.68367	50.2312	PSMD14;H2BC5;CETN2;HMGB2;RPA1;GTF2H1;GTF2H5;PSMB8;RBX1;PSMB9;PSMA5;PSMA6;PSMA3;PSMA4;PSMB2;PSMA2;PSMC2;PSME1;PSMD1;PSME2;ANP32B;H3-3A	.	Cardiac muscle contraction	11/87	0.00283797	0.0368936	0	0	2.90515	17.0377	COX7B;TPM4;TPM3;UQCRQ;COX7A2;COX6A1;COX6C;COX7C;COX5A;SLC8A1;UQCRH
	ATP synthesis coupled proton transport (GO:0015986)	8/19	1.24874e-06	0.000187257	0	0	14.6015	198.483	ATP5PF;ATP5PD;ATP5PB;ATP5PO;ATP5F1C;ATP5MG;ATP5F1E;ATP5ME	.	Shigellosis	22/246	0.00366265	0.0455442	0	0	1.97901	11.1014	ACTR2;JUN;CBX3;ARPC1A;IL18;CUL1;UBE2D1;ARPC5;MYL12A;RHOA;MYL12B;ACTG1;RBX1;CDC42;ARPC3;CASP4;UBE2V2;CASP1;VDAC1;TLR4;H3-3A;PPID
	NIK/NF-kappaB signaling (GO:0038061)	15/74	1.79967e-06	0.000258628	0	0	5.12933	67.8502	PSMD14;CUL1;PSMB8;PSMB9;PSMA5;PSMA6;PSMA3;PSMA4;PSMB2;PSMA2;PSMC2;PSME1;PSMD1;PSME2;TLR3	.	Antigen processing and presentation	10/78	0.00391902	0.0467017	0	0	2.94988	16.348	PDIA3;CANX;HSPA6;PSME1;PSME2;HLA-A;CALR;B2M;CTSS;HLA-DPA1
	regulation of transcription from RNA polymerase II promoter in response to hypoxia (GO:0061418)	15/75	2.15126e-06	0.000296787	0	0	5.04357	65.8159	PSMD14;HIGD1A;PSMB8;RBX1;PSMB9;PSMA5;PSMA6;PSMA3;PSMA4;PSMB2;PSMA2;PSMC2;PSME1;PSMD1;PSME2	.	Human T-cell leukemia virus 1 infection	20/219	0.0043066	0.0492675	0	0	2.02347	11.0231	RB1;IL15RA;NRP1;RANBP1;FDPS;JUN;IL15;PTEN;CD3G;HLA-A;IL2RA;CANX;TBPL1;VDAC2;E2F2;VDAC1;CALR;B2M;RAN;HLA-DPA1
	Wnt signaling pathway, planar cell polarity pathway (GO:0060071)	16/85	2.31131e-06	0.000298988	0	0	4.68085	60.7467	PSMD14;RHOA;PSMB8;PSMB9;PSMA5;CDC42;VANGL1;PSMA6;PSMA3;PSMA4;PSMB2;PSMA2;PSMC2;PSME1;PSMD1;PSME2	.	Endocytosis	22/252	0.00487405	0.0517755	0	0	1.92677	10.2578	VPS29;ACTR2;RAB4A;VTA1;ARPC1A;HSPA6;CLTA;ASAP1;HLA-A;ARPC5;RHOA;RAB11A;RUFY1;SNX3;CDC42;RAB10;ARPC3;IL2RA;CCR5;SNX6;WASHC3;CHMP5
	regulation of cell cycle phase transition (GO:1901987)	17/95	2.34058e-06	0.000298988	0	0	4.40215	57.0743	PSMD14;CUL1;ATP2B4;UBE2D1;PSMB8;PSMB9;PSMA5;PSMA6;PSMA3;PSMA4;PSMB2;PSMA2;PSMC2;PSME1;PSMD1;PSME2;NEK11	.	Retrograde endocannabinoid signaling	15/148	0.0048879	0.0517755	0	0	2.26655	12.0603	NDUFA6;NDUFB6;NDUFA12;NDUFB5;NDUFA4;NDUFB4;NDUFB3;NDUFA1;NDUFC2;NDUFB1;NDUFC1;NDUFS6;NDUFS4;NDUFAB1;ND1
	regulation of mitotic cell cycle phase transition (GO:1901990)	25/188	3.60537e-06	0.000442164	0	0	3.11048	38.9839	YWHAE;DYNC1I2;PSMD14;CETN2;CUL1;CCP110;UBE2D1;PSMB2;PSMD1;TMEM14B;TUBB;PSMB8;HAUS1;PSMB9;PSMA5;TPX2;PSMA6;PSMA3;PSMA4;PSMA2;HECW2;PSMC2;PSME1;PSME2;NEK11	.	Glutathione metabolism	21033	0.00546815	0.0558532	0	0	3.27133	17.0398	GGCT;GCLC;RRM2;GSTO1;IDH1;MGST2;LAP3;PRDX6
	regulation of establishment of planar polarity (GO:0090175)	16/88	3.71782e-06	0.000442164	0	0	4.48511	56.0745	PSMD14;RHOA;PSMB8;PSMB9;PSMA5;CDC42;VANGL1;PSMA6;PSMA3;PSMA4;PSMB2;PSMA2;PSMC2;PSME1;PSMD1;PSME2	.	Tuberculosis	17/180	0.00582807	0.0574768	0	0	2.09711	10.7898	APAF1;IL10RB;STAT1;IFNGR2;IL18;CTSS;RHOA;TLR1;FCGR3A;LAMP2;MRC1;CLEC4E;JAK2;FCGR1A;FCGR2B;TLR4;HLA-DPA1
	proteasomal ubiquitin-independent protein catabolic process (GO:0010499)	8/22	4.64679e-06	0.000534226	0	0	11.4708	140.853	PSMA5;PSMA6;PSMA3;PSMA4;PSMB2;PSMA2;PSMB8;PSMB9	.	Pathogenic Escherichia coli infection	18/197	0.00651226	0.0620836	0	0	2.02243	10.181	ACTR2;JUN;TUBB;ARPC1A;LPAR1;IL18;ARPC5;RHOA;ACTG1;CDC42;CASP7;ARPC3;CASP4;TNFSF10;CASP1;FAS;TLR4;NCK1
	regulation of hematopoietic stem cell differentiation (GO:1902036)	14/71	5.57186e-06	0.000619914	0	0	4.95061	59.8914	PSMD14;EIF2AK2;PSMB8;PSMB9;PSMA5;PSMA6;PSMA3;PSMA4;PSMB2;PSMA2;PSMC2;PSME1;PSMD1;PSME2	.	Apoptosis	14/142	0.00813921	0.0740692	0	0	2.19632	10.5667	JUN;PARP3;PARP4;APAF1;EIF2S1;CTSS;ACTG1;LMNB1;CASP7;AIFM1;CASP6;TNFSF10;FAS;CTSC
	mitochondrial electron transport, cytochrome c to oxygen (GO:0006123)	7/17	7.11314e-06	0.000766664	0	0	14.0398	166.422	COX7B;COX15;NDUFA4;COX6A1;COX6C;COX5A;COX7C	.	Biosynthesis of unsaturated fatty acids	44343	0.00828746	0.0740692	0	0	4.54593	21.7887	SCP2;ACOX1;HSD17B4;HACD2;HACD4
	pre-replicative complex assembly (GO:0036388)	13/64	8.51592e-06	0.000890043	0	0	5.13399	59.932	PSMD14;PSMB8;PSMB9;PSMA5;PSMA6;PSMA3;PSMA4;PSMB2;PSMA2;PSMC2;PSME1;PSMD1;PSME2	.	Pertussis	28004	0.0101313	0.0853555	0	0	2.69182	12.3612	CASP7;JUN;CASP1;SERPING1;LY96;TLR4;RHOA;C2;C1QC
	anaphase-promoting complex-dependent catabolic process (GO:0031145)	15/84	9.34993e-06	0.000948468	0	0	4.38363	50.7631	RB1;PSMD14;UBE2D1;PSMB8;PSMB9;PSMA5;PSMA6;PSMA3;PSMA4;PSMB2;PSMA2;PSMC2;PSME1;PSMD1;PSME2	.	Sulfur metabolism	44265	0.0101472	0.0853555	0	0	8.56109	39.3002	ETHE1;SQOR;BPNT1
	cellular protein modification process (GO:0006464)	80/1025	1.0152e-05	0.00100041	0	0	1.74908	20.1106	ERO1A;ST6GALNAC1;LRRK2;PTPRO;PTEN;UBE2L6;PTPRJ;CD3G;PTPN22;PHEX;UBE2L3;UBL5;DUSP12;FCGR3A;NUB1;PPP4R1;OGFOD1;PSMD1;JAK2;TGM2;MORC3;PARP3;WSB1;PARP4;WSB2;IGFBP3;ALG5;SIRT5;PPP2R5C;RABGGTB;PARP9;UCHL3;DUSP6;RBX1;CTTNBP2NL;PSMA5;PSMA6;PSMA3;RCN1;PSMA4;PSMA2;DAD1;PSME1;BTK;PSME2;FAM20A;CSTA;PXK;PSMD14;CUL1;DAPP1;NEDD8;GLRX;RNF7;STK3;SOCS2;TGOLN2;PPP2CB;NUAK1;PSMB2;ST8SIA4;GCNT2;ST8SIA6;B3GALNT2;SLC35…	.	Rheumatoid arthritis	34243	0.0133016	0.108693	0	0	2.41486	10.4319	CD86;ATP6V1A;JUN;ATP6V0E1;IL15;IL18;ATP6V1B2;TLR4;TNFSF13B;HLA-DPA1
	regulation of hematopoietic progenitor cell differentiation (GO:1901532)	14/75	1.08629e-05	0.00104073	0	0	4.625	52.8645	PSMD14;EIF2AK2;PSMB8;PSMB9;PSMA5;PSMA6;PSMA3;PSMA4;PSMB2;PSMA2;PSMC2;PSME1;PSMD1;PSME2	.	Fatty acid degradation	15858	0.0157911	0.125452	0	0	3.24444	13.4589	HADHB;ACAA2;CYP2U1;ACOX1;ACSL4;ACAT1
	regulation of transcription from RNA polymerase II promoter in response to stress (GO:0043618)	15/87	1.45364e-05	0.00135503	0	0	4.20032	46.7867	PSMD14;HIGD1A;PSMB8;RBX1;PSMB9;PSMA5;PSMA6;PSMA3;PSMA4;PSMB2;PSMA2;PSMC2;PSME1;PSMD1;PSME2	.	SNARE interactions in vesicular transport	12175	0.0192613	0.140565	0	0	3.57068	14.103	VAMP7;VAMP4;SNAP29;VAMP5;VAMP3
	inner mitochondrial membrane organization (GO:0007007)	18203	1.53874e-05	0.00139661	0	0	5.82194	64.5186	TIMM8B;ATP5PF;ATP5PD;AGK;ATP5PB;TIMM9;ATP5PO;ATP5F1C;ATP5MG;ATP5F1E;ATP5ME	.	Basal transcription factors	16589	0.0194748	0.140565	0	0	3.07773	12.1221	GTF2A2;TAF12;TAF7;TBPL1;GTF2H1;GTF2H5
	SCF-dependent proteasomal ubiquitin-dependent protein catabolic process (GO:0031146)	15/89	1.9278e-05	0.00170487	0	0	4.08637	44.3638	PSMD14;CUL1;PSMB8;RBX1;PSMB9;PSMA5;PSMA6;PSMA3;PSMA4;PSMB2;PSMA2;PSMC2;PSME1;PSMD1;PSME2	.	Spinocerebellar ataxia	13/143	0.0196526	0.140565	0	0	2.00573	7.88159	PSMD14;SEM1;PSMA5;PSMA6;PSMA3;PSMA4;PSMB2;PSMA2;PSMC2;PSMD1;TBPL1;VDAC2;VDAC1
	T cell receptor signaling pathway (GO:0050852)	21/158	2.13816e-05	0.00184363	0	0	3.09963	33.3303	PSMD14;CUL1;CD3G;PTPN22;PTPRJ;HLA-A;PSMB8;PSMB9;PSMA5;PSMA6;PSMA3;PSMA4;PSMB2;PSMA2;PSMC2;PSME1;PSMD1;PSME2;ERMAP;HLA-DPA1;NCK1	.	Lysosome	12/128	0.0196595	0.140565	0	0	2.07423	8.15004	SCARB2;CD63;ASAH1;GGA3;GNPTAB;LAMP2;AP1S2;CLTA;AP3S1;LIPA;CTSS;CTSC
	cristae formation (GO:0042407)	8/28	3.49641e-05	0.00294125	0	0	8.027	82.3666	ATP5PF;ATP5PD;ATP5PB;ATP5PO;ATP5F1C;ATP5MG;ATP5F1E;ATP5ME	.	Propanoate metabolism	12540	0.0217192	0.151505	0	0	3.44737	13.2019	BCKDHA;ACOX1;ECHDC1;SUCLG1;ACAT1
	tumor necrosis factor-mediated signaling pathway (GO:0033209)	17/116	3.63689e-05	0.00298658	0	0	3.46452	35.4136	PSMD14;STAT1;PSMB8;TNFSF13B;PSMB9;PSMA5;PSMA6;PSMA3;PSMA4;PSMB2;PSMA2;TMSB4X;PSMC2;PSME1;PSMD1;PSME2;JAK2	.	Nucleotide excision repair	17319	0.0237035	0.161409	0	0	2.92729	10.9543	RFC4;CETN2;RPA1;GTF2H1;GTF2H5;RBX1
	interleukin-1-mediated signaling pathway (GO:0070498)	15/94	3.75799e-05	0.00301426	0	0	3.82673	38.9907	PSMD14;CUL1;PSMB8;RBX1;PSMB9;PSMA5;PSMA6;PSMA3;PSMA4;PSMB2;PSMA2;PSMC2;PSME1;PSMD1;PSME2	.	Amino sugar and nucleotide sugar metabolism	17685	0.0260315	0.17314	0	0	2.85744	10.4252	CYB5R2;UGDH;CMAS;GNPDA1;PMM2;PGM2
	cellular response to hypoxia (GO:0071456)	18/131	5.21618e-05	0.00408878	0	0	3.21488	31.7024	ACAA2;PSMD14;AK4;HIGD1A;PSMB8;RBX1;PSMB9;PSMA5;PSMA6;PSMA3;PSMA4;PSMB2;PSMA2;PSMC2;PSME1;PSMD1;PSME2;CARD16	.	Toll-like receptor signaling pathway	10/104	0.0270271	0.175676	0	0	2.13103	7.69498	CD86;IFNAR2;TLR1;JUN;STAT1;LY96;TLR8;TLR7;TLR4;TLR3
	positive regulation of interferon-gamma production (GO:0032729)	11/57	6.86888e-05	0.00526461	0	0	4.80741	46.0834	IL18;TLR8;F2RL1;PTPN22;TLR7;HLA-A;CYRIB;TLR4;TLR3;CD244;HLA-DPA1	.	Lipid and atherosclerosis	17/215	0.0293422	0.183133	0	0	1.72321	6.08073	ERO1A;JUN;APAF1;HSPA6;IL18;LY96;EIF2S1;RHOA;CDC42;CASP7;CASP6;TNFSF10;CASP1;FAS;PPARG;JAK2;TLR4
	Fc-epsilon receptor signaling pathway (GO:0038095)	16/111	7.49322e-05	0.0055935	0	0	3.39512	32.25	JUN;PSMD14;CUL1;PSMB8;PSMB9;PSMA5;PSMA6;PSMA3;PSMA4;PSMB2;PSMA2;PSMC2;BTK;PSME1;PSMD1;PSME2	.	Bacterial invasion of epithelial cells	28338	0.0304116	0.183133	0	0	2.32068	8.10596	CDC42;ACTR2;ARPC3;ARPC1A;CLTA;ARPC5;RHOA;ACTG1
	antigen receptor-mediated signaling pathway (GO:0050851)	22/185	7.7178e-05	0.0055935	0	0	2.72843	25.8366	PSMD14;CUL1;CD3G;PTPN22;PTPRJ;HLA-A;PSMB8;PSMB9;PSMA5;PSMA6;PSMA3;PSMA4;PSMB2;PSMA2;PSMC2;BTK;PSME1;PSMD1;PSME2;ERMAP;HLA-DPA1;NCK1	.	Leishmaniasis	28338	0.0304116	0.183133	0	0	2.32068	8.10596	FCGR3A;JUN;STAT1;IFNGR2;JAK2;FCGR1A;TLR4;HLA-DPA1
	mitochondrial translational elongation (GO:0070125)	14/89	7.94669e-05	0.0055935	0	0	3.7589	35.4846	MRPS36;MRPL18;MRPL48;MRPS30;MRPL23;MRPS6;MRPL13;MRPL33;MRPL44;MRPL22;MRPL52;MRPL3;MRPL9;CHCHD1	.	Vibrio cholerae infection	18415	0.0311316	0.183133	0	0	2.72727	9.46236	ERO1A;ATP6V1A;ATP6V0E1;SEC61G;ATP6V1B2;ACTG1
	mitochondrial translational termination (GO:0070126)	14/89	7.94669e-05	0.0055935	0	0	3.7589	35.4846	MRPS36;MRPL18;MRPL48;MRPS30;MRPL23;MRPS6;MRPL13;MRPL33;MRPL44;MRPL22;MRPL52;MRPL3;MRPL9;CHCHD1	.	Yersinia infection	12/137	0.031376	0.183133	0	0	1.92397	6.66022	CDC42;ACTR2;JUN;ARPC3;ARPC1A;CASP1;IL18;ARPC5;TLR4;RHOA;ACTG1;SKAP2
	Fc receptor signaling pathway (GO:0038093)	16/112	8.3609e-05	0.00576735	0	0	3.35957	31.5443	JUN;PSMD14;CUL1;PSMB8;PSMB9;PSMA5;PSMA6;PSMA3;PSMA4;PSMB2;PSMA2;PSMC2;BTK;PSME1;PSMD1;PSME2	.	Inflammatory bowel disease	23924	0.0350325	0.200386	0	0	2.41456	8.09233	JUN;MAF;STAT1;IFNGR2;IL18;TLR4;HLA-DPA1
	regulation of stem cell differentiation (GO:2000736)	14/91	0.000101792	0.00688393	0	0	3.66088	33.6529	PSMD14;EIF2AK2;PSMB8;PSMB9;PSMA5;PSMA6;PSMA3;PSMA4;PSMB2;PSMA2;PSMC2;PSME1;PSMD1;PSME2	.	Fatty acid elongation	44313	0.0379261	0.210339	0	0	3.47479	11.3699	HADHB;ACAA2;HACD2;HACD4
	cellular protein metabolic process (GO:0044267)	38/417	0.000112053	0.00735427	0	0	2.03859	18.5441	ERO1A;MRPS36;MRPL18;SRBD1;UBE2L6;NEDD8;PSEN1;TTF1;MRPL13;PHEX;UBE2L3;TGOLN2;PCMT1;UBL5;DUSP12;MRPL3;FDXR;ST8SIA4;RPL38;IGF2BP3;LTA4H;MRPL9;SEC11C;SLC35A1;PARP4;GOLM1;IGFBP3;MRPL23;RABGGTB;MRPS6;WARS1;MRPL52;RPS26;SPCS2;RCN1;SPCS1;GGCX;CALU	.	Hepatitis C	13/157	0.0382434	0.210339	0	0	1.80938	5.90544	RB1;IFNAR2;YWHAE;APAF1;STAT1;EIF2AK1;EIF2AK2;EIF2S1;PPP2CB;E2F2;FAS;SOS2;TLR3
	cellular response to lectin (GO:1990858)	16/115	0.000115144	0.00735427	0	0	3.25725	29.5411	PSMD14;CUL1;PSMB8;PSMB9;PSMA5;PSMA6;PSMA3;PSMA4;PSMB2;PSMA2;CLEC6A;PSMC2;PSME1;PSMD1;PSME2;CLEC4E	.	Toxoplasmosis	10/112	0.0419188	0.224256	0	0	1.96306	6.22688	LAMA2;IL10RB;STAT1;IFNGR2;HSPA6;LY96;CCR5;JAK2;TLR4;HLA-DPA1
	stimulatory C-type lectin receptor signaling pathway (GO:0002223)	16/115	0.000115144	0.00735427	0	0	3.25725	29.5411	PSMD14;CUL1;PSMB8;PSMB9;PSMA5;PSMA6;PSMA3;PSMA4;PSMB2;PSMA2;CLEC6A;PSMC2;PSME1;PSMD1;PSME2;CLEC4E	.	Fc gamma R-mediated phagocytosis	35674	0.0423421	0.224256	0	0	2.04718	6.47314	CDC42;ACTR2;FCGR3A;ARPC3;ARPC1A;ASAP1;ARPC5;FCGR1A;FCGR2B
	regulation of mitotic cell cycle (GO:0007346)	21/178	0.000124714	0.00782069	0	0	2.70191	24.2888	RB1;INTS13;PSMD14;CUL1;UBE2D1;IQGAP1;TTL;PSMB8;CKS1B;PSMB9;PSMA5;PSMA6;PSMA3;PSMA4;PSMB2;PSMA2;PSMC2;PSME1;PSMD1;PSME2;NEK11	.	Kaposi sarcoma-associated herpesvirus infection	15/193	0.044207	0.225093	0	0	1.68951	5.26937	RB1;CCR1;CD86;IFNAR2;JUN;STAT1;EIF2AK2;HLA-A;RCAN1;FAS;E2F2;CCR5;JAK2;TLR3;MICB
	mitochondrial translation (GO:0032543)	15/105	0.000138015	0.00850022	0	0	3.35707	29.8381	MRPS36;MRPL18;MRPL48;MRPS30;MTIF3;MRPL23;MRPL13;MRPS6;MRPL22;MRPL33;MRPL44;MRPL52;MRPL3;MRPL9;CHCHD1	.	Ferroptosis	15097	0.0446052	0.225093	0	0	2.77603	8.63318	GCLC;LPCAT3;NCOA4;VDAC2;ACSL4
	energy coupled proton transport, down electrochemical gradient (GO:0015985)	5/12	0.000147572	0.00892939	0	0	14.2985	126.13	ATP5PD;ATP5PB;ATP5PO;ATP5F1C;ATP5MG	.	Primary bile acid biosynthesis	44272	0.0448612	0.225093	0	0	4.27897	13.2827	HSD3B7;SCP2;HSD17B4
	regulation of primary metabolic process (GO:0080090)	17/130	0.000155044	0.0092198	0	0	3.03304	26.6052	FDPS;PSMD14;GGPS1;PSMB8;PSMB9;PSMA5;PSMA6;PSMA3;PSMA4;PSMB2;PSMA2;CARM1;PSMC2;PSME1;PSMD1;PSME2;PPARG	.	Citrate cycle (TCA cycle)	44316	0.052978	0.252732	0	0	3.07337	9.02918	FH;IDH1;SUCLG1;SDHD
	innate immune response activating cell surface receptor signaling pathway (GO:0002220)	16/119	0.000173062	0.0101168	0	0	3.1301	27.1125	PSMD14;CUL1;PSMB8;PSMB9;PSMA5;PSMA6;PSMA3;PSMA4;PSMB2;PSMA2;CLEC6A;PSMC2;PSME1;PSMD1;PSME2;CLEC4E	.	Pentose phosphate pathway	44316	0.052978	0.252732	0	0	3.07337	9.02918	RPE;PGM2;IDNK;DERA
	translational termination (GO:0006415)	14/96	0.000182793	0.0104347	0	0	3.43675	29.5806	MRPS36;MRPL18;MRPL48;MRPS30;MRPL23;MRPS6;MRPL13;MRPL33;MRPL44;MRPL22;MRPL52;MRPL3;MRPL9;CHCHD1	.	Coronavirus disease	17/232	0.0536785	0.252732	0	0	1.58552	4.63724	IFNAR2;NRP1;JUN;STAT1;EIF2AK2;RPS27L;C2;RPS26;IFIH1;RPL36AL;CASP1;TLR8;RPL38;TLR7;TLR4;TLR3;C1QC
	mitotic spindle organization (GO:0007052)	19/157	0.000184551	0.0104347	0	0	2.77801	23.8842	GPSM2;DYNC1I2;CENPU;INTS13;ABRAXAS2;TTK;KIF11;SMC3;SKA1;RHOA;NSL1;RAB11A;SKA2;DYNC1LI1;TPX2;DSN1;CENPQ;RAN;SPC25	.	Legionellosis	20972	0.0539043	0.252732	0	0	2.35207	6.86934	CASP7;APAF1;HSPA6;CASP1;IL18;TLR4
	protein deubiquitination (GO:0016579)	27/267	0.000206616	0.0114939	0	0	2.27713	19.3206	PSMD14;PTEN;CCP110;UBE2D1;NEDD8;ABRAXAS2;SNX3;IFIH1;RHOT1;PSMB2;USP1;PSMD1;SMAD1;UCHL3;RHOA;UCHL5;PSMB8;PSMB9;TADA2B;PSMA5;PSMA6;PSMA3;PSMA4;PSMA2;PSMC2;PSME1;PSME2	.	Vasopressin-regulated water reabsorption	16193	0.0576043	0.264442	0	0	2.56208	7.31258	NSF;DCTN5;DYNC1I2;DYNC1LI1;RAB11A
	regulation of interferon-gamma production (GO:0032649)	13/86	0.000213661	0.0115222	0	0	3.58261	30.277	IL18;PTPN22;HLA-A;PDCD1LG2;CYRIB;C1QBP;TLR8;F2RL1;TLR7;TLR4;TLR3;CD244;HLA-DPA1	.	Systemic lupus erythematosus	11/135	0.0589211	0.264442	0	0	1.77607	5.02905	CD86;FCGR3A;SSB;H2BC5;SNRPD1;MACROH2A2;FCGR1A;H3-3A;C2;HLA-DPA1;C1QC
	regulation of mRNA stability (GO:0043488)	18/146	0.000213808	0.0115222	0	0	2.83589	23.9645	PSMD14;FASTKD1;SAMD4A;PSMB8;PSMB9;PSMA5;PSMA6;PSMA3;RIDA;PSMA4;PSMB2;PSMA2;EXOSC9;PSMC2;PSME1;PSMD1;PSME2;IGF2BP3	.	Regulation of actin cytoskeleton	16/218	0.0591758	0.264442	0	0	1.5877	4.48881	PDGFRB;ACTR2;ARPC1A;LPAR1;IQGAP1;ARPC5;MYL12A;RHOA;MYL12B;ACTG1;CDC42;DIAPH2;ARPC3;TMSB4X;SOS2;ARHGEF6
	regulation of mRNA catabolic process (GO:0061013)	16/122	0.000231756	0.0122973	0	0	3.04103	25.4529	PSMD14;SAMD4A;PSMB8;PSMB9;PSMA5;PSMA6;PSMA3;PSMA4;PSMB2;PSMA2;EXOSC9;PSMC2;PSME1;PSMD1;PSME2;IGF2BP3	.	Th1 and Th2 cell differentiation	33817	0.0729802	0.319329	0	0	1.90476	4.98584	JUN;MAF;STAT1;IFNGR2;IL2RA;CD3G;JAK2;HLA-DPA1
	positive regulation of interferon-alpha production (GO:0032727)	6/20	0.000255322	0.0133425	0	0	8.58496	71.0233	IFIH1;STAT1;TLR8;TLR7;TLR4;TLR3	.	Drug metabolism	9/108	0.0736914	0.319329	0	0	1.81866	4.74283	RRM2;TPMT;GSTO1;MGST2;TK2;HPRT1;FMO5;CES1;TYMP
	non-canonical Wnt signaling pathway (GO:0035567)	16/124	0.000279851	0.0144061	0	0	2.9844	24.4161	PSMD14;RHOA;PSMB8;PSMB9;VANGL1;PSMA5;CDC42;PSMA6;PSMA3;PSMA4;PSMB2;PSMA2;PSMC2;PSME1;PSMD1;PSME2	.	Ribosome	12/158	0.0764851	0.326488	0	0	1.6454	4.22977	RPS26;MRPL3;RPL36AL;MRPL18;RPS27L;RPL38;MRPL9;MRPL23;MRPL13;MRPS6;MRPL22;MRPL33
	protein modification process (GO:0036211)	12/78	0.000313149	0.0158831	0	0	3.65524	29.4935	ERO1A;DUSP12;UBL5;SLC35A1;PARP4;GGCX;ST8SIA4;UBE2L6;NEDD8;RABGGTB;PHEX;UBE2L3	.	Intestinal immune network for IgA production	17654	0.0779576	0.327881	0	0	2.32326	5.928	CD86;IL15RA;IL15;TNFSF13B;HLA-DPA1
	positive regulation of binding (GO:0051099)	13/90	0.000338371	0.0169137	0	0	3.39578	27.1369	RALB;DTX3L;LRRK2;HMGB2;PSEN1;TXN;PARP9;STK3;DPH3;PPARG;CLIC2;B2M;RAN	.	Osteoclast differentiation	10/127	0.083093	0.339563	0	0	1.71003	4.25421	IFNAR2;JUN;FCGR3A;STAT1;IFNGR2;BTK;PPARG;FCGR1A;FCGR2B;LILRA5
	regulation of response to interferon-gamma (GO:0060330)	5/14	0.000344296	0.0169332	0	0	11.1199	88.67	SUMO1;STAT1;IFNGR2;PARP9;JAK2	.	Nicotinate and nicotinamide metabolism	12875	0.0841957	0.339563	0	0	2.57699	6.37704	NMNAT1;NMRK1;SIRT5;NT5C2
	protein modification by small protein removal (GO:0070646)	27/276	0.000352038	0.0169332	0	0	2.19377	17.4444	PSMD14;PTEN;CCP110;UBE2D1;NEDD8;ABRAXAS2;SNX3;IFIH1;RHOT1;PSMB2;USP1;PSMD1;SMAD1;UCHL3;RHOA;UCHL5;PSMB8;PSMB9;TADA2B;PSMA5;PSMA6;PSMA3;PSMA4;PSMA2;PSMC2;PSME1;PSME2	.	Human immunodeficiency virus 1 infection	15/212	0.0842971	0.339563	0	0	1.52503	3.77202	APOBEC3C;PDIA3;JUN;CUL1;CD3G;HLA-A;RNF7;SAMHD1;RBX1;AP1S2;FAS;CALR;CCR5;B2M;TLR4
	interferon-gamma-mediated signaling pathway (GO:0060333)	11/68	0.000353491	0.0169332	0	0	3.87742	30.8164	SP100;STAT1;IFNGR2;HLA-A;JAK2;FCGR1A;GBP2;B2M;GBP1;TRIM22;HLA-DPA1	.	Cholesterol metabolism	18384	0.0894044	0.3525	0	0	2.21977	5.35982	NCEH1;SOAT1;VDAC2;VDAC1;LIPA
	cellular response to tumor necrosis factor (GO:0071356)	21/194	0.000411091	0.0194226	0	0	2.44995	19.1015	ASAH1;PSMD14;STAT1;PSMB8;PSMB9;TNFSF13B;PSMA5;PSMA6;PSMA3;PSMA4;PSMB2;PSMA2;TMSB4X;PSMC2;PSME1;PSMD1;PSME2;CD58;JAK2;GBP2;GBP1	.	Purine metabolism	10/129	0.0899739	0.3525	0	0	1.68112	4.04852	NT5C3A;NUDT9;GUCY1A1;RRM2;PGM2;AK4;HPRT1;NUDT5;AK6;NT5C2
	translational elongation (GO:0006414)	14/104	0.000426679	0.0198867	0	0	3.12994	24.2867	MRPS36;MRPL18;MRPL48;MRPS30;MRPL23;MRPL13;MRPS6;MRPL22;MRPL33;MRPL44;MRPL52;MRPL3;MRPL9;CHCHD1	.	Mismatch repair	44278	0.0948124	0.366437	0	0	2.99433	7.05422	RFC4;RPA1;SSBP1
	regulation of interleukin-8 production (GO:0032677)	12/81	0.000447284	0.0205691	0	0	3.49576	26.9604	TLR1;TMSB4X;ANXA4;TLR8;F2RL1;PTPN22;TLR7;CD58;TLR4;TLR3;CD244;LAMTOR5	.	Peroxisome	30133	0.0969088	0.369546	0	0	1.86558	4.35425	SCP2;ACOX1;PRDX1;IDH1;HSD17B4;ACSL4;FAR2
	positive regulation of canonical Wnt signaling pathway (GO:0090263)	16/130	0.000479354	0.0217538	0	0	2.82643	21.6026	KANK1;PSMD14;LRRK2;ATP6AP2;PSMB8;PSMB9;PSMA5;PSMA6;PSMA3;PSMA4;PSMB2;PSMA2;PSMC2;PSME1;PSMD1;PSME2	.	African trypanosomiasis	13606	0.0987153	0.371481	0	0	2.42055	5.60482	IL18;F2RL1;FAS;HBA2
	histone mRNA catabolic process (GO:0071044)	5/15	0.000496193	0.0222256	0	0	10.0074	76.1415	SSB;TUT7;ERI1;LSM1;MTPAP	.	Pathways in cancer	32/531	0.106185	0.390069	0	0	1.28708	2.88637	RB1;FH;RALB;LAMA2;CUL1;PTEN;LPAR1;MGST2;CKS1B;CDC42;CASP7;FRAT2;E2F2;JAK2;IFNAR2;PDGFRB;IL15RA;JUN;APAF1;GSTO1;STAT1;TPM3;IL15;IFNGR2;HGF;NCOA4;RHOA;RBX1;IL2RA;FAS;PPARG;SOS2
	Fc-gamma receptor signaling pathway involved in phagocytosis (GO:0038096)	11/71	0.000518293	0.0226979	0	0	3.68296	27.8615	CDC42;ACTR2;FCGR3A;ARPC3;ARPC1A;CD3G;ARPC5;FCGR1A;FCGR2B;ACTG1;NCK1	.	Allograft rejection	13971	0.106382	0.390069	0	0	2.34923	5.26396	CD86;FAS;HLA-A;HLA-DPA1
	negative regulation of cell-substrate adhesion (GO:0010812)	8/40	0.0005199	0.0226979	0	0	5.01371	37.9131	KANK1;PTPRO;GCNT2;TBCD;AP1AR;ITGB1BP1;GBP1;RHOA	.	Viral carcinogenesis	14/203	0.108396	0.392422	0	0	1.48266	3.29441	RB1;YWHAE;RANBP1;JUN;SP100;GTF2A2;H2BC5;EIF2AK2;GTF2H1;HLA-A;RHOA;CDC42;TBPL1;CCR5
	Fc-gamma receptor signaling pathway (GO:0038094)	11/72	0.000585781	0.0247313	0	0	3.6224	26.9599	CDC42;ACTR2;FCGR3A;ARPC3;ARPC1A;CD3G;ARPC5;FCGR1A;FCGR2B;ACTG1;NCK1	.	Renal cell carcinoma	25355	0.111485	0.398557	0	0	1.90286	4.17462	CDC42;FH;JUN;HGF;SOS2;RBX1
	regulation of interferon-gamma-mediated signaling pathway (GO:0060334)	6/23	0.000587987	0.0247313	0	0	7.06885	52.5838	SUMO1;STAT1;IFNGR2;PPARG;PARP9;JAK2	.	Chagas disease	8/102	0.11496	0.405907	0	0	1.70123	3.68005	PPP2CB;JUN;IFNGR2;FAS;CD3G;CALR;TLR4;C1QC
	regulation of peptidase activity (GO:0052547)	6/23	0.000587987	0.0247313	0	0	7.06885	52.5838	CSTB;CSTA;PSMA3;SVBP;NRDC;PSMB8	.	Neutrophil extracellular trap formation	13/189	0.120311	0.419622	0	0	1.4779	3.12971	H2BC5;MACROH2A2;ACTG1;FCGR3A;CASP4;CASP1;VDAC2;TLR8;VDAC1;TLR7;FCGR1A;TLR4;H3-3A
	regulation of substrate adhesion-dependent cell spreading (GO:1900024)	9/51	0.000623967	0.0259285	0	0	4.29974	31.7296	CDC42;NRP1;KANK1;C1QBP;AP1AR;ITGB1BP1;CALR;GBP1;S100A10	.	Pyrimidine metabolism	20576	0.128535	0.442905	0	0	1.958	4.01694	NT5C3A;RRM2;TK2;NT5C2;TYMP
	cellular response to interferon-gamma (GO:0071346)	15/121	0.000659123	0.0270633	0	0	2.84793	20.86	SP100;STAT1;IFNGR2;HLA-A;CASP1;CD58;JAK2;FCGR1A;GBP2;B2M;TLR4;GBP1;TRIM22;GBP4;HLA-DPA1	.	Homologous recombination	15067	0.130908	0.445711	0	0	2.15841	4.38862	SEM1;RPA1;SSBP1;PALB2
	fatty acid beta-oxidation (GO:0006635)	9/52	0.000723036	0.0292242	0	0	4.19953	30.3712	HADHB;ACAA2;SCP2;ACOX1;ECHDC1;HSD17B4;ETFA;ACAT1;DECR1	.	PD-L1 expression and PD-1 checkpoint pathway in cancer	32690	0.133279	0.448443	0	0	1.7057	3.43752	JUN;STAT1;IFNGR2;PTEN;CD3G;JAK2;TLR4
	Fc receptor mediated stimulatory signaling pathway (GO:0002431)	11/74	0.000742841	0.0292242	0	0	3.50703	25.2682	CDC42;ACTR2;FCGR3A;ARPC3;ARPC1A;CD3G;ARPC5;FCGR1A;FCGR2B;ACTG1;NCK1	.	Collecting duct acid secretion	44282	0.13652	0.453567	0	0	2.49475	4.96777	ATP6V1A;ATP6V0E1;ATP6V1B2
	mitotic nuclear division (GO:0140014)	11/74	0.000742841	0.0292242	0	0	3.50703	25.2682	EPS8;TPX2;DSN1;ABRAXAS2;KIF11;SMC3;KNSTRN;RHOA;NSL1;RAB11A;RAN	.	Cell cycle	9/124	0.13951	0.453567	0	0	1.56431	3.0811	RB1;YWHAE;ANAPC13;CUL1;E2F2;CDC7;TTK;SMC3;RBX1
	cytokine-mediated signaling pathway (GO:0019221)	48/621	0.000745644	0.0292242	0	0	1.70408	12.2716	CD86;SP100;PSMD14;CUL1;PTPRJ;SAMHD1;TNFSF13B;IFIT2;LMNB1;SOCS2;CDC42;PSMB2;TMSB4X;CASP1;PSMD1;JAK2;FCGR1A;CCR5;GBP2;B2M;GBP1;TRIM22;HLA-DPA1;IFNAR2;CCR1;IL15RA;GSTO1;IL10RB;STAT1;IL15;IFNGR2;HGF;IL18;HLA-A;PSMB8;PSMB9;RBX1;PSMA5;PSMA6;PSMA3;PSMA4;PSMA2;IL2RA;PSMC2;CANX;PSME1;PSME2;RHOU	.	Graft-versus-host disease	15432	0.139559	0.453567	0	0	2.1015	4.13842	CD86;FAS;HLA-A;HLA-DPA1
	response to endoplasmic reticulum stress (GO:0034976)	14/110	0.000756831	0.0293293	0	0	2.93339	21.0804	ERO1A;PDIA3;NIBAN1;JUN;UBA5;EIF2S1;TMCO1;ERLEC1;ERP44;AIFM1;TMX1;TMEM33;CASP4;NCK1	.	Type I diabetes mellitus	15797	0.148431	0.476982	0	0	2.04751	3.9059	CD86;FAS;HLA-A;HLA-DPA1
	positive regulation of phagocytosis (GO:0050766)	9/53	0.000834559	0.0319822	0	0	4.10387	29.0907	IL15RA;IL15;RAB27A;F2RL1;PTPRJ;ANO6;CALR;FCGR2B;C2	.	Hepatitis B	11/162	0.153466	0.48232	0	0	1.45641	2.72973	RB1;IFIH1;JUN;APAF1;STAT1;E2F2;FAS;JAK2;SOS2;TLR4;TLR3
	defense response to symbiont (GO:0140546)	15/124	0.00085282	0.0320453	0	0	2.76911	19.5692	IFNAR2;APOBEC3C;MLKL;STAT1;EIF2AK2;SAMHD1;IFIT2;IFIH1;NT5C3A;PLSCR1;IFI16;TLR8;F2RL1;TLR7;TLR3	.	JAK-STAT signaling pathway	11/162	0.153466	0.48232	0	0	1.45641	2.72973	IFNAR2;PDGFRB;SOCS2;IL15RA;IL15;IL10RB;STAT1;IFNGR2;IL2RA;JAK2;SOS2
	regulation of innate immune response (GO:0045088)	10/64	0.000859536	0.0320453	0	0	3.71741	26.2416	IFNAR2;PLSCR1;IFI16;TLR8;PTPN22;NMI;PARP9;SAMHD1;FCGR2B;N4BP1	.	Pancreatic cancer	27912	0.155307	0.482804	0	0	1.71194	3.18823	RB1;CDC42;RALB;STAT1;E2F2;ARHGEF6
	I-kappaB phosphorylation (GO:0007252)	4/10	0.00086408	0.0320453	0	0	13.3319	94.0414	PRDX4;TLR7;TLR4;TLR3	.	Viral myocarditis	22037	0.158258	0.486687	0	0	1.81522	3.3464	CD86;LAMA2;HLA-A;ACTG1;HLA-DPA1
	negative regulation of canonical Wnt signaling pathway (GO:0090090)	18/165	0.000943557	0.0337973	0	0	2.46686	17.1838	PSMD14;PTPRO;KREMEN1;PSMB8;RBX1;STK3;PSMB9;PSMA5;PSMA6;PSMA3;PSMA4;PSMB2;PSMA2;PSMC2;PSME1;PSMD1;PSME2;SCYL2	.	Human papillomavirus infection	20/331	0.168378	0.503654	0	0	1.28707	2.29297	RB1;IFNAR2;PDGFRB;ATP6V1A;ATP6V0E1;LAMA2;STAT1;PTEN;EIF2AK2;HLA-A;PSEN1;PPP2R5C;CDC42;PPP2CB;PPP2R3C;ATP6V1B2;TBPL1;FAS;SOS2;TLR3
	establishment of protein localization to endoplasmic reticulum (GO:0072599)	5/17	0.000943987	0.0337973	0	0	8.33859	58.0816	RAB10;SPCS2;SPCS1;SEC61G;MAN1A1	.	Synaptic vesicle cycle	28642	0.169045	0.503654	0	0	1.66421	2.95828	NSF;ATP6V1A;ATP6V0E1;ATP6V1B2;CLTA;SLC6A12
	regulation of interferon-alpha production (GO:0032647)	6/25	0.00095052	0.0337973	0	0	6.3241	44.0063	IFIH1;STAT1;TLR8;TLR7;TLR4;TLR3	.	Staphylococcus aureus infection	34881	0.169059	0.503654	0	0	1.5889	2.82428	FCGR3A;KRT10;FCGR1A;FCGR2B;HLA-DPA1;C2;C1QC
	regulation of proteolysis involved in cellular protein catabolic process (GO:1903050)	6/25	0.00095052	0.0337973	0	0	6.3241	44.0063	NUB1;PSMD14;PSME1;PSME2;CTSC;UCHL5	.	Natural killer cell mediated cytotoxicity	9/131	0.175452	0.517312	0	0	1.47401	2.56535	IFNAR2;FCGR3A;IFNGR2;TNFSF10;FAS;HLA-A;SOS2;CD244;MICB
	deoxyribonucleotide metabolic process (GO:0009262)	3/5	0.00101251	0.0342367	0	0	29.9717	206.664	RRM2;SAMHD1;DERA	.	Spliceosome	10/150	0.181575	0.529901	0	0	1.42736	2.43521	SNRPD1;SF3B6;HSPA6;SNRNP27;PPIH;SNRPE;SNRPB2;SNRPF;SNRPC;MAGOHB
	mRNA 3'-end processing by stem-loop binding and cleavage (GO:0006398)	3/5	0.00101251	0.0342367	0	0	29.9717	206.664	SLBP;CPSF3;CPSF2	.	Tight junction	11/169	0.186275	0.538127	0	0	1.39137	2.33825	CDC42;ACTR2;PPP2CB;JUN;ARPC3;ARPC1A;ARPC5;MYL12A;RHOA;ACTG1;MYL12B
	negative regulation of dendritic cell differentiation (GO:2001199)	3/5	0.00101251	0.0342367	0	0	29.9717	206.664	TMEM176B;TMEM176A;FCGR2B	.	mRNA surveillance pathway	35977	0.188375	0.538751	0	0	1.53627	2.56454	PPP2CB;PPP2R3C;CPSF3;CPSF2;UPF3A;PPP2R5C;MAGOHB
	negative regulation of leukocyte differentiation (GO:1902106)	3/5	0.00101251	0.0342367	0	0	29.9717	206.664	TMEM176B;TMEM176A;FCGR2B	.	B cell receptor signaling pathway	29738	0.190553	0.539586	0	0	1.59739	2.64819	JUN;BTK;DAPP1;FCGR2B;SOS2;LILRA5
	regulation of intracellular cholesterol transport (GO:0032383)	3/5	0.00101251	0.0342367	0	0	29.9717	206.664	NUS1;ARV1;SCP2	.	Valine, leucine and isoleucine degradation	17624	0.19573	0.548812	0	0	1.81436	2.95926	BCKDHA;HADHB;ACAA2;ACAT1
	post-translational protein modification (GO:0043687)	30/345	0.00120625	0.0403523	0	0	1.92626	12.9449	PSMD14;CUL1;NEDD8;RNF7;TGOLN2;SOCS2;NUB1;PSMB2;PSMD1;WSB1;WSB2;GOLM1;FEM1B;IGFBP3;UCHL3;RABGGTB;PSMB8;RAB11A;PSMB9;RBX1;PSMA5;PSMA6;PSMA3;RCN1;PSMA4;PSMA2;PSMC2;PSME1;CALU;PSME2	.	Cysteine and methionine metabolism	18354	0.215812	0.593482	0	0	1.73529	2.66081	GCLC;ADI1;APIP;KYAT3
	cellular response to interleukin-1 (GO:0071347)	17/155	0.00121677	0.0403523	0	0	2.4803	16.6467	PSMD14;CUL1;PSMB8;RBX1;PSMB9;PSMA5;PSMA6;PSMA3;PSMA4;PSMB2;PSMA2;PSMC2;PSME1;PSMD1;PSME2;GBP2;GBP1	.	Malaria	18354	0.215812	0.593482	0	0	1.73529	2.66081	HGF;IL18;HBA2;TLR4
	protein localization to organelle (GO:0033365)	16/142	0.00125862	0.0413427	0	0	2.55562	17.0658	YWHAE;SSB;TMEM30A;ARL3;LRRK2;ARL1;RPA1;SNX10;TOR1AIP1;RAB11A;SEC61G;LAMP2;CALR;GBP2;GBP1;OPTN	.	Mitophagy	24959	0.224779	0.612254	0	0	1.58405	2.36441	JUN;RHOT1;FUNDC1;TOMM7;OPTN
	copper ion transport (GO:0006825)	4/11	0.00130664	0.0421177	0	0	11.4268	75.8772	STEAP4;SLC31A2;SLC31A1;COX17	.	Epithelial cell signaling in Helicobacter pylori infection	25689	0.242577	0.631242	0	0	1.53515	2.17443	ATP6V1A;CDC42;JUN;ATP6V0E1;ATP6V1B2
	glutathione biosynthetic process (GO:0006750)	4/11	0.00130664	0.0421177	0	0	11.4268	75.8772	GGCT;GCLC;MGST2;CNDP2	.	DNA replication	13210	0.246301	0.631242	0	0	1.81351	2.54109	RFC4;RPA1;SSBP1
	regulation of DNA binding (GO:0051101)	17380	0.00158243	0.0505352	0	0	4.1123	26.5194	SP100;JUN;IFI16;SUMO1;HMGB2;PPARG;TXN;JAK2	.	Mucin type O-glycan biosynthesis	13210	0.246301	0.631242	0	0	1.81351	2.54109	ST6GALNAC1;C1GALT1C1;GCNT1
	regulation of phagocytosis (GO:0050764)	21429	0.00162081	0.0512861	0	0	3.68414	23.6699	SNX3;IL15RA;PIP4P2;PLSCR1;IL15;RAB27A;CALR;FCGR2B;TGM2	.	Starch and sucrose metabolism	13210	0.246301	0.631242	0	0	1.81351	2.54109	GBE1;PGM2;GYG1
	defense response to virus (GO:0051607)	15/133	0.00174525	0.0547214	0	0	2.55669	16.2372	IFNAR2;APOBEC3C;MLKL;STAT1;EIF2AK2;SAMHD1;IFIT2;IFIH1;NT5C3A;PLSCR1;IFI16;TLR8;F2RL1;TLR7;TLR3	.	Autoimmune thyroid disease	19450	0.246897	0.631242	0	0	1.62879	2.27833	CD86;FAS;HLA-A;HLA-DPA1
	Golgi to plasma membrane transport (GO:0006893)	17746	0.00182071	0.0565687	0	0	4.00928	25.2927	NSF;RAB10;GGA3;ARL3;EXOC6;VAMP4;VAMP5;OPTN	.	Endocrine and other factor-regulated calcium reabsorption	19450	0.246897	0.631242	0	0	1.62879	2.27833	ATP2B4;CLTA;SLC8A1;RAB11A
	mitochondrion organization (GO:0007005)	18/175	0.00184596	0.0565687	0	0	2.30852	14.5316	TIMM8B;ALAS1;LRRK2;TIMM9;SIRT5;TIMM23;COX7A2;HIGD1A;TMEM70;IFIT2;TYMP;PRDX3;RHOT1;AIFM1;TOMM7;MTFR2;SSBP1;TOMM5	.	Steroid biosynthesis	44247	0.247564	0.631242	0	0	2.21593	3.09363	SOAT1;LIPA
	nonribosomal peptide biosynthetic process (GO:0019184)	44298	0.00188617	0.0565687	0	0	9.9979	62.7189	GGCT;GCLC;MGST2;CNDP2	.	Th17 cell differentiation	7/107	0.251066	0.631242	0	0	1.39734	1.93118	JUN;STAT1;IFNGR2;IL2RA;CD3G;JAK2;HLA-DPA1
	nucleoside salvage (GO:0043174)	44298	0.00188617	0.0565687	0	0	9.9979	62.7189	PUDP;TK2;HPRT1;TYMP	.	Adherens junction	26054	0.251614	0.631242	0	0	1.51181	2.08608	CDC42;PTPRJ;IQGAP1;RHOA;ACTG1
	protein mono-ADP-ribosylation (GO:0140289)	44298	0.00188617	0.0565687	0	0	9.9979	62.7189	PARP3;PARP4;PARP9;PARP12	.	Phosphonate and phosphinate metabolism	44202	0.254663	0.633335	0	0	3.98723	5.45379	CHPT1
	ATP synthesis coupled electron transport (GO:0042773)	44261	0.001953	0.0570839	0	0	19.9801	124.643	NDUFB6;NDUFA12;COA6	.	Thyroid cancer	13575	0.259324	0.637349	0	0	1.76008	2.37554	TPM3;NCOA4;PPARG
	foam cell differentiation (GO:0090077)	44261	0.001953	0.0570839	0	0	19.9801	124.643	SOAT1;STAT1;PPARG	.	Melanoma	26420	0.260734	0.637349	0	0	1.48916	2.00182	RB1;PDGFRB;HGF;PTEN;E2F2
	macrophage derived foam cell differentiation (GO:0010742)	44261	0.001953	0.0570839	0	0	19.9801	124.643	SOAT1;STAT1;PPARG	.	Pantothenate and CoA biosynthesis	44248	0.265591	0.643721	0	0	2.09919	2.78311	PANK2;VNN2
	cellular modified amino acid biosynthetic process (GO:0042398)	44336	0.00209898	0.0603281	0	0	6.66982	41.1282	GGCT;GCLC;PLSCR1;MGST2;CNDP2	.	p53 signaling pathway	26785	0.269929	0.648736	0	0	1.46719	1.92142	RRM2;APAF1;IGFBP3;PTEN;FAS
	protein targeting to lysosome (GO:0006622)	44336	0.00209898	0.0603281	0	0	6.66982	41.1282	SCARB2;GGA3;GNPTAB;NCOA4;LAMP2	.	Small cell lung cancer	33756	0.276868	0.659464	0	0	1.39226	1.78797	RB1;APAF1;LAMA2;PTEN;E2F2;CKS1B
	protein ADP-ribosylation (GO:0006471)	44376	0.00216575	0.0617327	0	0	5.22316	32.044	HPF1;PARP3;PARP4;SIRT5;PARP9;PARP12	.	PPAR signaling pathway	27150	0.279193	0.659464	0	0	1.44585	1.84469	SCP2;ACOX1;DBI;ACSL4;PPARG
	positive regulation of interleukin-8 production (GO:0032757)	22525	0.00232369	0.0656917	0	0	3.47104	21.0505	TLR1;TLR8;F2RL1;TLR7;CD58;TLR4;TLR3;CD244;LAMTOR5	.	Hepatocellular carcinoma	10/168	0.283588	0.659464	0	0	1.26355	1.59236	RB1;SMARCE1;FRAT2;GSTO1;HGF;PTEN;MGST2;E2F2;SOS2;ACTG1
	Golgi to plasma membrane protein transport (GO:0043001)	44377	0.00259927	0.0717743	0	0	5.00526	29.7939	NSF;RAB10;GGA3;VAMP4;VAMP5;OPTN	.	Histidine metabolism	44249	0.283616	0.659464	0	0	1.99413	2.51287	HNMT;CNDP2
	negative regulation of cell morphogenesis involved in differentiation (GO:0010771)	44299	0.00262208	0.0717743	0	0	8.88655	52.8198	KANK1;AP1AR;ITGB1BP1;GBP1	.	Glioma	27515	0.288518	0.665454	0	0	1.42512	1.77141	RB1;PDGFRB;PTEN;E2F2;SOS2
	negative regulation of substrate adhesion-dependent cell spreading (GO:1900025)	44299	0.00262208	0.0717743	0	0	8.88655	52.8198	KANK1;AP1AR;ITGB1BP1;GBP1	.	Glycine, serine and threonine metabolism	14671	0.298836	0.683736	0	0	1.61711	1.95325	ALAS1;SARDH;PSPH
	protein neddylation (GO:0045116)	44299	0.00262208	0.0717743	0	0	8.88655	52.8198	DCUN1D5;NEDD8;RNF7;RBX1	.	Bladder cancer	15036	0.312093	0.708402	0	0	1.57447	1.8334	RB1;E2F2;TYMP
	regulation of cholesterol metabolic process (GO:0090181)	44337	0.0026477	0.0717943	0	0	6.25263	37.1035	ARV1;LPCAT3;FMO5;RAN;CES1	.	Riboflavin metabolism	44204	0.324236	0.730169	0	0	2.84772	3.20734	RFK
	positive regulation of response to external stimulus (GO:0032103)	15/139	0.00269518	0.0717943	0	0	2.43221	14.3897	PDGFRB;IL15;IL18;LY96;MGST2;NMI;SCIMP;LILRA5;PLSCR1;TLR8;F2RL1;TLR7;TLR4;OPTN;TLR3	.	Cellular senescence	9/156	0.32991	0.737142	0	0	1.22171	1.3548	RB1;RBBP4;IGFBP3;PTEN;VDAC2;E2F2;VDAC1;HLA-A;PPID
	protein dephosphorylation (GO:0006470)	15/139	0.00269518	0.0717943	0	0	2.43221	14.3897	EYA3;PTPRO;PTEN;DAPP1;PTPN22;PTPRJ;PPP2R5C;PTPN12;DUSP6;CTTNBP2NL;DUSP12;PPP2CB;PPP4R1;UBLCP1;NCK1	.	Porphyrin and chlorophyll metabolism	15766	0.338635	0.745936	0	0	1.49559	1.61948	ALAS1;FECH;COX15
	negative regulation of transport (GO:0051051)	18841	0.00270871	0.0717943	0	0	3.72898	22.043	SNX3;PIP4P2;PLSCR1;PXK;MCTP1;PTEN;FCGR2B;CTTNBP2NL	.	Neurotrophin signaling pathway	7/119	0.342312	0.745936	0	0	1.24684	1.33665	YWHAE;CDC42;JUN;KIDINS220;PSEN1;SOS2;RHOA
	positive regulation of Wnt signaling pathway (GO:0030177)	16/153	0.00272689	0.0717943	0	0	2.34906	13.8702	KANK1;PSMD14;LRRK2;ATP6AP2;PSMB8;PSMB9;PSMA5;PSMA6;PSMA3;PSMA4;PSMB2;PSMA2;PSMC2;PSME1;PSMD1;PSME2	.	Sphingolipid signaling pathway	7/119	0.342312	0.745936	0	0	1.24684	1.33665	PPP2CB;ASAH1;SPTLC2;PPP2R3C;PTEN;PPP2R5C;RHOA
	membrane organization (GO:0061024)	22/242	0.00300404	0.0782699	0	0	2.01542	11.7051	SCARB2;ACTR2;UBXN2B;ARPC1A;MYOF;USO1;CLTA;CD3G;ARPC5;TOR1AIP1;ACTG1;SNX3;TGOLN2;VAMP7;TMEM33;ARPC3;LPCAT3;VAMP4;SNAP29;CEP55;VAMP3;CHMP5	.	Viral protein interaction with cytokine and cytokine receptor	6/100	0.34439	0.745936	0	0	1.27324	1.35725	CCR1;IL10RB;IL2RA;TNFSF10;IL18;CCR5
	regulation of G0 to G1 transition (GO:0070316)	15158	0.00301824	0.0782699	0	0	4.12416	23.9328	RRM2;RBBP4;APAF1;CBX3;CDC7;BMI1;RHNO1	.	Fluid shear stress and atherosclerosis	8/139	0.346887	0.745936	0	0	1.21835	1.28993	JUN;SUMO1;GSTO1;SUMO2;MGST2;TXN;RHOA;ACTG1
	positive regulation of protein targeting to mitochondrion (GO:1903955)	11475	0.00309476	0.0790653	0	0	4.8048	27.7624	UBL5;LEPROT;PDCD5;TOMM7;RHOU;UBE2L3	.	AMPK signaling pathway	7/120	0.350143	0.74732	0	0	1.23574	1.2968	RAB10;PPP2CB;RAB14;CAB39L;PPP2R3C;PPARG;PPP2R5C
	receptor signaling pathway via JAK-STAT (GO:0007259)	11475	0.00309476	0.0790653	0	0	4.8048	27.7624	SOCS2;IFNAR2;IL15;STAT1;NMI;JAK2	.	Ubiquitin mediated proteolysis	8/140	0.354147	0.750267	0	0	1.20905	1.25505	ANAPC13;UBE2Q1;CUL1;UBE2D1;UBE2L6;RNF7;UBE2L3;RBX1
	microtubule cytoskeleton organization involved in mitosis (GO:1902850)	14/128	0.0032519	0.0812116	0	0	2.46787	14.1372	GPSM2;DYNC1I2;CENPU;INTS13;TTK;KIF11;SKA1;NSL1;SKA2;DYNC1LI1;DSN1;CENPQ;RAN;SPC25	.	ABC transporters	16497	0.365109	0.765106	0	0	1.42422	1.43499	ABCA6;ABCC5;ABCG2
	Cdc42 protein signal transduction (GO:0032488)	44262	0.0032965	0.0812116	0	0	14.9843	85.6335	CDC42;SHTN1;RHOU	.	Focal adhesion	11/201	0.366502	0.765106	0	0	1.15508	1.15941	PDGFRB;CDC42;JUN;LAMA2;HGF;PTEN;SOS2;MYL12A;RHOA;MYL12B;ACTG1
	negative regulation of MyD88-independent toll-like receptor signaling pathway (GO:0034128)	44262	0.0032965	0.0812116	0	0	14.9843	85.6335	LY96;TLR4;TLR3	.	C-type lectin receptor signaling pathway	6/104	0.378788	0.779377	0	0	1.22101	1.18533	JUN;STAT1;CLEC6A;CASP1;CLEC4E;RHOA
	pantothenate metabolic process (GO:0015939)	44262	0.0032965	0.0812116	0	0	14.9843	85.6335	PANK2;VNN2;PDZD11	.	T cell receptor signaling pathway	6/104	0.378788	0.779377	0	0	1.22101	1.18533	CDC42;JUN;CD3G;SOS2;RHOA;NCK1
	regulation of histamine secretion by mast cell (GO:1903593)	44262	0.0032965	0.0812116	0	0	14.9843	85.6335	VAMP7;SNX6;VAMP3	.	Synthesis and degradation of ketone bodies	44206	0.387321	0.782799	0	0	2.21466	2.10061	ACAT1
	protein transport (GO:0015031)	30/369	0.00333712	0.0816292	0	0	1.78759	10.194	ATP6V1A;VPS29;COPB2;TMEM167A;USO1;ARL1;CD3G;HIKESHI;GGA3;SVBP;LAMP2;TMED2;ARFIP1;TBC1D12;SNX6;TMED4;NSF;ATP6V0E1;COPZ2;WDR11;RUFY1;RAB10;SEC23IP;RAB14;CANX;ATP6V1B2;PPARG;VAMP4;VAMP5;OPTN	.	Aminoacyl-tRNA biosynthesis	24198	0.388258	0.782799	0	0	1.28639	1.21704	GARS1;NARS1;DARS2;WARS1
	toll-like receptor signaling pathway (GO:0002224)	33543	0.00403736	0.0980623	0	0	2.75931	15.2098	TLR1;BTK;UBE2D1;TLR8;LY96;TLR7;NMI;TLR4;SCIMP;CTSS;TLR3	.	Human cytomegalovirus infection	12/225	0.39056	0.782799	0	0	1.12384	1.0566	RB1;CCR1;PDIA3;IL10RB;FAS;E2F2;HLA-A;CALR;CCR5;B2M;SOS2;RHOA
	regulation of viral genome replication (GO:0045069)	24716	0.00444344	0.107171	0	0	3.11099	16.8501	IFIH1;APOBEC3C;FAM111A;PLSCR1;IFI16;EIF2AK2;PPIH;PPID;N4BP1	.	Pyruvate metabolism	17227	0.3914	0.782799	0	0	1.35934	1.2751	FH;GLO1;ACAT1
	proteasomal protein catabolic process (GO:0010498)	19/205	0.0045304	0.108509	0	0	2.05587	11.0954	UBXN2B;PSMD14;FEM1B;PPP2R5C;PSMB8;PSMB9;RBX1;PSMA5;PSMA6;ERLEC1;PSMA3;PSMA4;PSMB2;PSMA2;HECW2;PSMC2;PSME1;PSMD1;PSME2	.	RNA transport	10/186	0.397723	0.789921	0	0	1.13324	1.04485	SUMO1;NUP42;POP4;SUMO2;UPF3A;EIF2S2;MAGOHB;EIF2S1;THOC7;RAN
	Arp2/3 complex-mediated actin nucleation (GO:0034314)	44301	0.00463757	0.11031	0	0	7.27005	39.0661	ACTR2;ARPC3;ARPC1A;ARPC5	.	Gap junction	32264	0.412443	0.812096	0	0	1.20108	1.06375	PDGFRB;GUCY1A1;TUBB;LPAR1;SOS2
	response to interferon-gamma (GO:0034341)	29495	0.00470859	0.11075	0	0	2.8653	15.3533	NUB1;SP100;STAT1;CASP1;CD58;GBP2;TLR4;GBP1;GBP4;HLA-DPA1	.	Ubiquinone and other terpenoid-quinone biosynthesis	44207	0.416622	0.812096	0	0	1.99309	1.7451	GGCX
	negative regulation of Wnt signaling pathway (GO:0030178)	18/191	0.00474148	0.11075	0	0	2.09324	11.2018	PSMD14;PTPRO;KREMEN1;PSMB8;RBX1;STK3;PSMB9;PSMA5;PSMA6;PSMA3;PSMA4;PSMB2;PSMA2;PSMC2;PSME1;PSMD1;PSME2;SCYL2	.	Sphingolipid metabolism	17958	0.417406	0.812096	0	0	1.3001	1.1359	ASAH1;SPTLC2;ACER3
	protein polyubiquitination (GO:0000209)	26/314	0.00475238	0.11075	0	0	1.8207	9.73912	ANAPC13;PSMD14;CUL1;UBE2D1;UBE2L6;UBE2L3;PSMB2;UBE2Q1;PSMD1;TRIM22;WSB1;DTX3L;PSMB8;PSMB9;RBX1;PSMA5;PSMA6;PSMA3;PSMA4;PSMA2;HECW2;PSMC2;MKRN1;PSME1;UBE2V2;PSME2	.	Oocyte meiosis	7/129	0.421063	0.812398	0	0	1.14403	0.989559	YWHAE;ANAPC13;PPP2CB;CUL1;PPP2R5C;SMC3;RBX1
	mitochondrial transport (GO:0006839)	20668	0.00490122	0.112695	0	0	3.33966	17.7612	TIMM8B;TIMM9;TOMM7;TIMM23;TMEM14B;TOMM5;TMEM14C;SLC25A24	.	beta-Alanine metabolism	10990	0.423568	0.812398	0	0	1.42378	1.22308	ACOX1;CNDP2
	positive regulation of interleukin-1 beta production (GO:0032731)	20668	0.00490122	0.112695	0	0	3.33966	17.7612	IFI16;STMP1;CASP1;TLR8;F2RL1;JAK2;TLR4;LILRA5	.	N-Glycan biosynthesis	18323	0.430274	0.812398	0	0	1.27238	1.07304	DAD1;ALG5;MAN1A1
	regulation of MyD88-independent toll-like receptor signaling pathway (GO:0034127)	44263	0.00508775	0.115286	0	0	11.9868	63.3012	LY96;TLR4;TLR3	.	Hypertrophic cardiomyopathy	32994	0.431471	0.812398	0	0	1.1727	0.985717	TPM4;LAMA2;TPM3;SLC8A1;ACTG1
	regulation of canonical Wnt signaling pathway (GO:0060828)	22/253	0.00510509	0.115286	0	0	1.91832	10.124	KANK1;PSMD14;LRRK2;PTPRO;ATP6AP2;KREMEN1;PSEN1;PSMB8;PSMB9;RBX1;STK3;PSMA5;PSMA6;PSMA3;PSMA4;PSMB2;PSMA2;PSMC2;PSME1;PSMD1;PSME2;SCYL2	.	Prolactin signaling pathway	25659	0.431764	0.812398	0	0	1.20817	1.01472	SOCS2;STAT1;JAK2;SOS2
	activation of cysteine-type endopeptidase activity involved in apoptotic process (GO:0006919)	29860	0.0051476	0.115286	0	0	2.82479	14.8845	AIFM1;APAF1;CASP4;CASP1;TNFSF10;RPS27L;FAS;PPARG;ANP32B;JAK2	.	Transcriptional misregulation in cancer	10/192	0.436613	0.816153	0	0	1.09553	0.907875	CD86;SMAD1;MAF;IGFBP3;PBX3;PPARG;BMI1;FCGR1A;H3-3A;DUSP6
	positive regulation of tumor necrosis factor superfamily cytokine production (GO:1903557)	29860	0.0051476	0.115286	0	0	2.82479	14.8845	CD86;IFIH1;TLR1;LY96;PTPRJ;PSEN1;JAK2;TLR4;TLR3;LILRA5	.	Circadian rhythm	11355	0.440144	0.817411	0	0	1.37461	1.12808	CUL1;RBX1
	MAPK cascade (GO:0000165)	25/303	0.00581012	0.129285	0	0	1.81266	9.33187	YWHAE;PSMD14;LRRK2;CUL1;SPRED1;PSMB2;PSMD1;CCR5;JAK2;PDGFRB;HGF;IL18;DUSP6;PSMB8;PSMB9;RBX1;PSMA5;PSMA6;PSMA3;PSMA4;PSMA2;IL2RA;PSMC2;PSME1;PSME2	.	Non-small cell lung cancer	26390	0.453212	0.83625	0	0	1.17252	0.927923	RB1;HGF;E2F2;SOS2
	receptor signaling pathway via STAT (GO:0097696)	44341	0.00590126	0.129933	0	0	5.00105	25.6683	SOCS2;IFNAR2;STAT1;NMI;JAK2	.	mTOR signaling pathway	8/154	0.456419	0.836768	0	0	1.09231	0.856745	ATP6V1A;CAB39L;PTEN;ATP6V1B2;SLC38A9;SOS2;RHOA;LAMTOR5
	late endosome to vacuole transport via multivesicular body sorting pathway (GO:0032511)	44302	0.00595228	0.129933	0	0	6.66387	34.1455	LEPROT;TMEM50A;VTA1;CHMP5	.	TGF-beta signaling pathway	34455	0.469095	0.849881	0	0	1.11976	0.8476	PPP2CB;SMAD1;CUL1;RHOA;RBX1
	necroptotic process (GO:0070266)	44302	0.00595228	0.129933	0	0	6.66387	34.1455	MLKL;LY96;TLR4;TLR3	.	Non-homologous end-joining	44209	0.47109	0.849881	0	0	1.66073	1.25004	XRCC4
	positive regulation of protein binding (GO:0032092)	21398	0.00608372	0.130324	0	0	3.20574	16.3561	PPP2CB;RALB;DTX3L;LRRK2;PSEN1;B2M;RAN;STK3	.	Base excision repair	12086	0.472486	0.849881	0	0	1.28579	0.964017	PARP3;PARP4
	glycoprotein biosynthetic process (GO:0009101)	30590	0.00612136	0.130324	0	0	2.74711	13.9992	B3GALNT2;NUS1;ST6GALNAC1;DAD1;ALG5;GCNT1;PMM2;GCNT2;ST8SIA4;ST8SIA6	.	Fanconi anemia pathway	19784	0.480611	0.859092	0	0	1.17234	0.858966	USP1;RPA1;PALB2
	regulation of defense response (GO:0031347)	30590	0.00612136	0.130324	0	0	2.74711	13.9992	PSMA6;TMSB4X;CASP4;CASP1;PTPN22;JAK2;SAMHD1;FCGR2B;N4BP1;ZMPSTE24	.	Dilated cardiomyopathy	35186	0.487618	0.861936	0	0	1.09503	0.786475	TPM4;LAMA2;TPM3;SLC8A1;ACTG1
	regulation of interleukin-1 beta production (GO:0032651)	30590	0.00612136	0.130324	0	0	2.74711	13.9992	SERPINB1;IFI16;STMP1;CASP1;TLR8;F2RL1;CARD16;JAK2;TLR4;LILRA5	.	Pentose and glucuronate interconversions	12451	0.488229	0.861936	0	0	1.24555	0.893018	UGDH;RPE
	myeloid leukocyte differentiation (GO:0002573)	26177	0.00653675	0.138314	0	0	2.90966	14.6365	CDC42;IFI16;OSTM1;IL15;GLO1;F2RL1;SNX10;PPARG;DEK	.	Prostate cancer	35551	0.496794	0.871675	0	0	1.08307	0.757694	RB1;PDGFRB;PTEN;E2F2;SOS2
	establishment of protein localization to plasma membrane (GO:0061951)	13302	0.00668616	0.139761	0	0	4.00295	20.0456	NSF;RAB10;GGA3;VAMP4;VAMP5;OPTN	.	Arrhythmogenic right ventricular cardiomyopathy	28216	0.505544	0.876905	0	0	1.09192	0.74482	LAMA2;SLC8A1;DSC2;ACTG1
	membrane fusion (GO:0061025)	13302	0.00668616	0.139761	0	0	4.00295	20.0456	NSF;UBXN2B;USO1;MYOF;SNAP29;VAMP3	.	Choline metabolism in cancer	35916	0.505907	0.876905	0	0	1.07137	0.730033	PDGFRB;JUN;SLC44A1;CHPT1;SOS2
	fatty acid oxidation (GO:0019395)	21763	0.00675051	0.140068	0	0	3.14272	15.7077	HADHB;ACAA2;SCP2;ACOX1;ECHDC1;HSD17B4;ACAT1;DECR1	.	Thiamine metabolism	44211	0.520478	0.896727	0	0	1.42334	0.92945	AK4
	cellular protein-containing complex assembly (GO:0034622)	16/168	0.00678206	0.140068	0	0	2.11557	10.564	SRP19;SMAD1;CENPW;PTGES3;TBCD;CLTA;COX7A2;TBCA;HIGD1A;AIFM1;RPL38;PSMG1;PSMG2;VAMP4;NCK1;VAMP3	.	RNA degradation	28946	0.52585	0.900557	0	0	1.06269	0.683033	EXOSC9;XRN2;LSM1;WDR61
	positive regulation of defense response (GO:0031349)	36100	0.00707814	0.145312	0	0	2.53636	12.5569	PLSCR1;IL15;IL18;MGST2;TLR8;TLR7;NMI;TLR4;OPTN;TLR3;LILRA5	.	Wnt signaling pathway	8/166	0.541663	0.922117	0	0	1.00871	0.618448	VANGL1;JUN;FRAT2;CUL1;CACYBP;PSEN1;RHOA;RBX1
	exonucleolytic trimming involved in rRNA processing (GO:0000459)	44264	0.00736223	0.148493	0	0	9.98846	49.0572	ERI1;ERI2;EXOSC9	.	Platelet activation	6/124	0.546711	0.925203	0	0	1.01299	0.611678	GUCY1A1;BTK;MYL12A;RHOA;ACTG1;MYL12B
	exonucleolytic trimming to generate mature 3'-end of 5.8S rRNA from tricistronic rRNA transcript (SSU-rRNA, 5.8S rRNA, LSU-rRNA) (GO:0000467)	44264	0.00736223	0.148493	0	0	9.98846	49.0572	ERI1;ERI2;EXOSC9	.	Mineral absorption	21976	0.551864	0.92843	0	0	1.0486	0.623345	SLC31A1;ATP2B4;SLC8A1
[truncated: 3,279 more rows]

## Sheet: grey60
Supplementary Table 5: Results of functional enrichment analysis per non-preserved module
[truncated: 721 more rows]

## Sheet: lightgreen
Supplementary Table 5: Results of functional enrichment analysis per non-preserved module
[truncated: 1,251 more rows]

## Sheet: lightyellow
Supplementary Table 5: Results of functional enrichment analysis per non-preserved module
[truncated: 955 more rows]

[truncated: 10 more sheets: midnightblue, pink, purple, turquoise, black, darkred, greenyellow, red, royalblue, yellow]
