# Supplementary material for: Differential Co-Expression Network Analysis Reveals Key Hub-High Traffic Genes as Potential Therapeutic Targets for COVID-19 Pandemic
Source: Front Immunol. 2021 Dec 15;12:789317. doi: 10.3389/fimmu.2021.789317 (PMC8714803; doi:10.3389/fimmu.2021.789317)
Supplement: Supplementary file 7 [file Table_6.xlsx]

## Sheet: black
Supplementary Table 6: Complete list of hub genes identified for each non-preserved module
Hubgenes_info	Gene_id	Symbol	kMEblack	kMEblack_pvalue
252	ENSG00000085872	CHERP	0.933194	4.63616e-08
	ENSG00000104897	SF3A2	0.917226	2.20669e-07
	ENSG00000142784	WDTC1	0.910982	3.73718e-07
	ENSG00000178188	SH2B1	0.902099	7.42812e-07
	ENSG00000099875	MKNK2	0.9019	7.53782e-07
	ENSG00000106948	AKNA	0.901002	8.04914e-07
	ENSG00000110046	ATG2A	0.900861	8.1319e-07
	ENSG00000175463	TBC1D10C	0.900173	8.5472e-07
	ENSG00000141258	SGSM2	0.899895	8.72052e-07
	ENSG00000130475	FCHO1	0.89916	9.19202e-07
	ENSG00000105519	CAPS	0.894045	1.31198e-06
	ENSG00000132017	DCAF15	0.892404	1.46505e-06
	ENSG00000184260	H2AC20	0.892174	1.48764e-06
	ENSG00000043143	JADE2	0.89119	1.58786e-06
	ENSG00000104859	CLASRP	0.88658	2.13767e-06
	ENSG00000130758	MAP3K10	0.886284	2.17803e-06
	ENSG00000104960	PTOV1	0.881774	2.87641e-06
	ENSG00000176248	ANAPC2	0.87834	3.5288e-06
	ENSG00000263069	RNF213-AS1	0.877883	3.62438e-06
	ENSG00000180448	ARHGAP45	0.877776	3.64718e-06
	ENSG00000131591	C1orf159	0.87737	3.73433e-06
	ENSG00000136490	LIMD2	0.875203	4.23079e-06
	ENSG00000198026	ZNF335	0.874634	4.37022e-06
	ENSG00000204469	PRRC2A	0.873309	4.7097e-06
	ENSG00000079435	LIPE	0.872191	5.0136e-06
	ENSG00000180096	SEPTIN1	0.870304	5.5644e-06
	ENSG00000103148	NPRL3	0.869765	5.73094e-06
	ENSG00000237441	RGL2	0.869638	5.77046e-06
	ENSG00000184640	SEPTIN9	0.868976	5.98209e-06
	ENSG00000139636	LMBR1L	0.865992	7.01884e-06
	ENSG00000115085	ZAP70	0.864321	7.66374e-06
	ENSG00000149091	DGKZ	0.862433	8.45208e-06
	ENSG00000088038	CNOT3	0.858687	1.0222e-05
	ENSG00000160613	PCSK7	0.857082	1.1071e-05
	ENSG00000099991	CABIN1	0.855923	1.17208e-05
	ENSG00000141456	PELP1	0.852092	1.4105e-05
	ENSG00000068831	RASGRP2	0.851573	1.44577e-05
	ENSG00000004139	SARM1	0.85053	1.51885e-05
	ENSG00000127585	FBXL16	0.849965	1.5598e-05
	ENSG00000213654	GPSM3	0.848634	1.65987e-05
	ENSG00000061938	TNK2	0.847678	1.73503e-05
	ENSG00000181045	SLC26A11	0.847178	1.77551e-05
	ENSG00000232587	EEF1A1P3	0.846278	1.85033e-05
	ENSG00000141524	TMC6	0.845091	1.95308e-05
	ENSG00000127419	TMEM175	0.843006	2.14533e-05
	ENSG00000261971	NA	0.842964	2.14937e-05
	ENSG00000125520	SLC2A4RG	0.841493	2.29474e-05
	ENSG00000061273	HDAC7	0.840889	2.35671e-05
	ENSG00000250571	GLI4	0.83867	2.59701e-05
	ENSG00000204231	RXRB	0.838191	2.65145e-05
	ENSG00000099904	ZDHHC8	0.837389	2.74493e-05
	ENSG00000100207	TCF20	0.836649	2.83352e-05
	ENSG00000149499	EML3	0.836217	2.88636e-05
	ENSG00000070423	RNF126	0.834785	3.06763e-05
	ENSG00000102977	ACD	0.834716	3.07657e-05
	ENSG00000176454	LPCAT4	0.83456	3.09698e-05
	ENSG00000160072	ATAD3B	0.832843	3.32863e-05
	ENSG00000104946	TBC1D17	0.83116	3.5699e-05
	ENSG00000146826	MAP11	0.830501	3.66823e-05
	ENSG00000178971	CTC1	0.830221	3.71072e-05
	ENSG00000107829	FBXW4	0.828688	3.95094e-05
	ENSG00000183741	CBX6	0.82778	4.0992e-05
	ENSG00000108963	DPH1	0.827624	4.12513e-05
	ENSG00000038358	EDC4	0.827089	4.21511e-05
	ENSG00000133619	KRBA1	0.826188	4.37053e-05
	ENSG00000197774	EME2	0.82607	4.39127e-05
	ENSG00000146083	RNF44	0.824826	4.61468e-05
	ENSG00000108773	KAT2A	0.821931	5.17185e-05
	ENSG00000168488	ATXN2L	0.821729	5.21282e-05
	ENSG00000131584	ACAP3	0.821558	5.24764e-05
	ENSG00000165684	SNAPC4	0.821006	5.36152e-05
	ENSG00000188986	NELFB	0.820935	5.37623e-05
	ENSG00000161847	RAVER1	0.819606	5.65939e-05
	ENSG00000246922	UBAP1L	0.818674	5.86545e-05
	ENSG00000277072	NA	0.818021	6.01374e-05
	ENSG00000108819	PPP1R9B	0.816721	6.31791e-05
	ENSG00000167595	PROSER3	0.815663	6.57521e-05
	ENSG00000275023	MLLT6	0.814651	6.82919e-05
	ENSG00000182979	MTA1	0.812159	7.49073e-05
	ENSG00000103253	HAGHL	0.811473	7.6819e-05
	ENSG00000169710	FASN	0.810317	8.01342e-05
	ENSG00000175662	TOM1L2	0.809014	8.40166e-05
	ENSG00000166925	TSC22D4	0.808707	8.49528e-05
	ENSG00000103495	MAZ	0.807308	8.93374e-05
	ENSG00000095059	DHPS	0.807268	8.94634e-05
	ENSG00000172493	AFF1	0.806298	9.26181e-05
	ENSG00000130175	PRKCSH	0.806223	9.28647e-05
	ENSG00000170604	IRF2BP1	0.806063	9.3396e-05
	ENSG00000167962	ZNF598	0.804669	9.81214e-05
	ENSG00000218596	NA	0.804609	9.83323e-05
	ENSG00000143811	PYCR2	0.802678	0.000105225
	ENSG00000175115	PACS1	0.802209	0.000106958
	ENSG00000103227	LMF1	0.801039	0.000111387
	ENSG00000128159	TUBGCP6	0.800648	0.0001129
	ENSG00000146067	FAM193B	0.800337	0.000114121
	ENSG00000105726	ATP13A1	0.800232	0.000114531
	ENSG00000109118	PHF12	0.799182	0.000118736
	ENSG00000099821	POLRMT	0.798345	0.000122179
	ENSG00000090565	RAB11FIP3	0.79818	0.000122867
	ENSG00000089094	KDM2B	0.797891	0.000124082
	ENSG00000183495	EP400	0.797857	0.000124223
	ENSG00000167302	TEPSIN	0.797788	0.000124514
	ENSG00000168970	JMJD7-PLA2G4B	0.797193	0.000127055
	ENSG00000135439	AGAP2	0.795518	0.000134431
	ENSG00000133265	HSPBP1	0.794955	0.000136993
	ENSG00000286190	LOC728392	0.794807	0.000137674
	ENSG00000105325	FZR1	0.793971	0.000141566
	ENSG00000154370	TRIM11	0.793562	0.000143505
	ENSG00000131116	ZNF428	0.793362	0.000144456
	ENSG00000103197	TSC2	0.791978	0.000151221
	ENSG00000125648	SLC25A23	0.79036	0.000159455
	ENSG00000181513	ACBD4	0.789728	0.000162776
	ENSG00000162004	CCDC78	0.788597	0.000168857
	ENSG00000171163	ZNF692	0.78737	0.000175669
	ENSG00000102890	ELMO3	0.786118	0.000182863
	ENSG00000169221	TBC1D10B	0.785864	0.00018435
	ENSG00000076984	MAP2K7	0.785309	0.000187632
	ENSG00000286035	NA	0.785061	0.000189117
	ENSG00000103222	ABCC1	0.784983	0.000189591
	ENSG00000167700	MFSD3	0.784009	0.000195528
	ENSG00000100307	CBX7	0.783883	0.000196307
	ENSG00000185129	PURA	0.783001	0.000201834
	ENSG00000140691	ARMC5	0.782932	0.000202272
	ENSG00000177051	FBXO46	0.782315	0.000206226
	ENSG00000133250	ZNF414	0.781895	0.000208954
	ENSG00000218891	ZNF579	0.780692	0.000216929
	ENSG00000215788	TNFRSF25	0.780322	0.000219437
	ENSG00000127415	IDUA	0.780206	0.000220224
	ENSG00000221829	FANCG	0.779875	0.000222494
	ENSG00000197457	STMN3	0.779743	0.0002234
	ENSG00000187961	KLHL17	0.779298	0.000226489
	ENSG00000164818	DNAAF5	0.779047	0.000228253
	ENSG00000135632	SMYD5	0.778813	0.000229901
	ENSG00000141985	SH3GL1	0.778133	0.000234753
	ENSG00000110844	PRPF40B	0.775617	0.000253448
	ENSG00000125846	ZNF133	0.775122	0.000257276
	ENSG00000080947	CROCCP3	0.773703	0.000268496
	ENSG00000205356	TECPR1	0.773656	0.000268875
	ENSG00000122678	POLM	0.771716	0.000284905
	ENSG00000177943	MAMDC4	0.770975	0.00029123
	ENSG00000103168	TAF1C	0.770884	0.000292011
	ENSG00000142765	SYTL1	0.770543	0.000294969
	ENSG00000100299	ARSA	0.770316	0.00029695
	ENSG00000127084	FGD3	0.769688	0.000302496
	ENSG00000088808	PPP1R13B	0.769537	0.000303842
	ENSG00000286177	LOC105372401	0.769007	0.000308609
	ENSG00000148341	SH3GLB2	0.768244	0.00031557
	ENSG00000007541	PIGQ	0.768011	0.000317724
	ENSG00000104866	PPP1R37	0.767589	0.000321653
	ENSG00000156860	FBRS	0.767393	0.000323495
	ENSG00000170265	ZNF282	0.765608	0.00034065
	ENSG00000135723	FHOD1	0.765068	0.000345998
	ENSG00000078814	MYH7B	0.764875	0.000347921
	ENSG00000114388	NPRL2	0.763753	0.000359285
	ENSG00000076201	PTPN23	0.763538	0.000361496
	ENSG00000171823	FBXL14	0.763165	0.00036537
	ENSG00000072062	PRKACA	0.762929	0.000367827
	ENSG00000158805	ZNF276	0.762554	0.000371773
	ENSG00000120896	SORBS3	0.759943	0.000400227
	ENSG00000185485	SDHAP1	0.758481	0.000416935
	ENSG00000140320	BAHD1	0.75817	0.000420555
	ENSG00000279253	NA	0.75771	0.000425969
	ENSG00000169592	INO80E	0.756322	0.000442663
	ENSG00000182841	RRP7BP	0.755599	0.000451576
	ENSG00000100241	SBF1	0.754916	0.000460121
	ENSG00000234771	NA	0.754709	0.000462743
	ENSG00000089351	GRAMD1A	0.754302	0.000467923
	ENSG00000183458	PKD1P3	0.753915	0.000472892
	ENSG00000196642	RABL6	0.752846	0.000486862
	ENSG00000065029	ZNF76	0.752493	0.000491553
	ENSG00000164620	RELL2	0.75229	0.000494258
	ENSG00000182993	C12orf60	0.75094	0.000512618
	ENSG00000187954	CYHR1	0.750394	0.000520204
	ENSG00000204371	EHMT2	0.747782	0.000557777
	ENSG00000108840	HDAC5	0.74631	0.000579939
	ENSG00000213676	ATF6B	0.746229	0.000581177
	ENSG00000105738	SIPA1L3	0.745439	0.000593378
	ENSG00000147130	ZMYM3	0.745089	0.000598864
	ENSG00000164880	INTS1	0.744328	0.000610912
	ENSG00000106404	CLDN15	0.743803	0.000619346
	ENSG00000243477	NAA80	0.743555	0.000623355
	ENSG00000174851	YIF1A	0.743349	0.000626703
	ENSG00000182685	BRICD5	0.742926	0.000633637
	ENSG00000130669	PAK4	0.742178	0.000646049
	ENSG00000250251	PKD1P6	0.740906	0.000667626
	ENSG00000167615	LENG8	0.740646	0.000672108
	ENSG00000204839	MROH6	0.739475	0.000692593
	ENSG00000161036	LRWD1	0.738528	0.000709558
	ENSG00000174996	KLC2	0.738513	0.000709816
	ENSG00000141933	TPGS1	0.738157	0.000716293
	ENSG00000198198	SZT2	0.737807	0.000722688
	ENSG00000099910	KLHL22	0.737789	0.000723012
	ENSG00000140521	POLG	0.734194	0.000791594
	ENSG00000167685	ZNF444	0.733239	0.000810675
	ENSG00000107331	ABCA2	0.733212	0.000811215
	ENSG00000173020	GRK2	0.732925	0.000817035
	ENSG00000168071	CCDC88B	0.731174	0.000853259
	ENSG00000254910	NA	0.730823	0.000860683
	ENSG00000011451	WIZ	0.729785	0.000882937
	ENSG00000160877	NACC1	0.729437	0.000890519
	ENSG00000180900	SCRIB	0.729236	0.000894898
	ENSG00000081692	JMJD4	0.729056	0.000898851
	ENSG00000149480	MTA2	0.728761	0.000905365
	ENSG00000175920	DOK7	0.727205	0.000940325
	ENSG00000148339	SLC25A25	0.726992	0.000945196
	ENSG00000197136	PCNX3	0.726962	0.000945885
	ENSG00000079432	CIC	0.72681	0.000949383
	ENSG00000104885	DOT1L	0.725781	0.000973298
	ENSG00000067191	CACNB1	0.724911	0.000993911
	ENSG00000260367	NA	0.723807	0.00102058
	ENSG00000279369	NA	0.723358	0.0010316
	ENSG00000174669	SLC29A2	0.723341	0.00103202
	ENSG00000214655	ZSWIM8	0.722752	0.00104662
	ENSG00000179943	FIZ1	0.722292	0.00105814
	ENSG00000215041	NEURL4	0.721942	0.00106699
	ENSG00000182183	SHISAL2A	0.721077	0.00108907
	ENSG00000178685	PARP10	0.720496	0.00110414
	ENSG00000213398	LCAT	0.720348	0.00110799
	ENSG00000175931	UBE2O	0.72019	0.00111213
	ENSG00000175826	CTDNEP1	0.72001	0.00111687
	ENSG00000137822	TUBGCP4	0.719318	0.00113519
	ENSG00000101082	SLA2	0.71918	0.00113888
	ENSG00000137200	CMTR1	0.719088	0.00114133
	ENSG00000198837	DENND4B	0.718181	0.00116585
	ENSG00000002016	RAD52	0.716901	0.00120117
	ENSG00000141867	BRD4	0.714966	0.00125624
	ENSG00000099840	IZUMO4	0.714853	0.00125951
	ENSG00000074370	ATP2A3	0.714372	0.00127356
	ENSG00000170128	GPR25	0.713761	0.00129159
	ENSG00000160796	NBEAL2	0.713727	0.00129258
	ENSG00000184922	FMNL1	0.713699	0.00129343
	ENSG00000104964	TLE5	0.711657	0.00135523
	ENSG00000121753	ADGRB2	0.711639	0.00135579
	ENSG00000263528	IKBKE	0.710867	0.0013798
	ENSG00000253200	NA	0.710023	0.00140644
	ENSG00000162298	SYVN1	0.708906	0.00144236
	ENSG00000132382	MYBBP1A	0.708281	0.00146276
	ENSG00000169246	NPIPB3	0.708091	0.00146902
	ENSG00000227507	LTB	0.708002	0.00147196
	ENSG00000104973	MED25	0.707677	0.00148273
	ENSG00000005206	SPPL2B	0.70739	0.00149229
	ENSG00000141503	MINK1	0.707039	0.00150406
	ENSG00000139266	MARCHF9	0.70599	0.00153966
	ENSG00000105698	USF2	0.705267	0.0015646
	ENSG00000185813	PCYT2	0.705086	0.0015709
	ENSG00000153048	CARHSP1	0.70436	0.00159635
	ENSG00000127191	TRAF2	0.704288	0.00159891
	ENSG00000160439	RDH13	0.703637	0.00162205
	ENSG00000140326	CDAN1	0.702152	0.00167589
	ENSG00000126461	SCAF1	0.701389	0.00170413
	ENSG00000235316	NA	0.70125	0.00170931
	ENSG00000072071	ADGRL1	0.701005	0.0017185

## Sheet: blue
Supplementary Table 6: Complete list of hub genes identified for each non-preserved module
Hubgenes_info	Gene_id	Symbol	kMEblue	kMEblue_pvalue
881	ENSG00000118503	TNFAIP3	0.967237	2.44713e-10
	ENSG00000112149	CD83	0.966342	2.98773e-10
	ENSG00000102981	PARD6A	0.966271	3.03457e-10
	ENSG00000100221	JOSD1	0.964283	4.63575e-10
	ENSG00000138166	DUSP5	0.963753	5.17003e-10
	ENSG00000185022	MAFF	0.963537	5.40166e-10
	ENSG00000163874	ZC3H12A	0.961953	7.39639e-10
	ENSG00000121966	CXCR4	0.960766	9.28034e-10
	ENSG00000205189	ZBTB10	0.959984	1.07377e-09
	ENSG00000175592	FOSL1	0.958875	1.31384e-09
	ENSG00000146232	NFKBIE	0.957751	1.60294e-09
	ENSG00000165943	MOAP1	0.957664	1.62744e-09
	ENSG00000116717	GADD45A	0.957393	1.7058e-09
	ENSG00000013441	CLK1	0.956818	1.88337e-09
	ENSG00000188486	H2AX	0.956424	2.01351e-09
	ENSG00000139620	KANSL2	0.954915	2.58797e-09
	ENSG00000182481	KPNA2	0.954866	2.60855e-09
	ENSG00000163597	SNHG16	0.954682	2.68822e-09
	ENSG00000126803	HSPA2	0.954532	2.75428e-09
	ENSG00000184545	DUSP8	0.95345	3.27521e-09
	ENSG00000006712	PAF1	0.952684	3.69379e-09
	ENSG00000067064	IDI1	0.952657	3.70887e-09
	ENSG00000116285	ERRFI1	0.952236	3.95868e-09
	ENSG00000185338	SOCS1	0.951469	4.45099e-09
	ENSG00000119986	AVPI1	0.951363	4.52351e-09
	ENSG00000197019	SERTAD1	0.951278	4.58195e-09
	ENSG00000132002	DNAJB1	0.950905	4.84622e-09
	ENSG00000072274	TFRC	0.950019	5.52789e-09
	ENSG00000173846	PLK3	0.94986	5.6582e-09
	ENSG00000144655	CSRNP1	0.948841	6.55979e-09
	ENSG00000059804	SLC2A3	0.948524	6.86475e-09
	ENSG00000101544	ADNP2	0.948466	6.9216e-09
	ENSG00000184588	PDE4B	0.948346	7.04158e-09
	ENSG00000109917	ZPR1	0.947562	7.86499e-09
	ENSG00000138670	RASGEF1B	0.947183	8.29303e-09
	ENSG00000119801	YPEL5	0.946533	9.07266e-09
	ENSG00000115008	IL1A	0.946435	9.19457e-09
	ENSG00000165997	ARL5B	0.946315	9.34671e-09
	ENSG00000102760	RGCC	0.946292	9.37641e-09
	ENSG00000070761	CFAP20	0.946141	9.57186e-09
	ENSG00000070495	JMJD6	0.946027	9.72187e-09
	ENSG00000145414	NAF1	0.945781	1.00519e-08
	ENSG00000183508	TENT5C	0.944509	1.19169e-08
	ENSG00000272886	DCP1A	0.944316	1.22246e-08
	ENSG00000177535	OR2B11	0.94393	1.28602e-08
	ENSG00000105849	POLR1F	0.94307	1.43789e-08
	ENSG00000132819	RBM38	0.942839	1.48117e-08
	ENSG00000158050	DUSP2	0.942398	1.56704e-08
	ENSG00000181788	SIAH2	0.942043	1.63917e-08
	ENSG00000135625	EGR4	0.941612	1.73059e-08
	ENSG00000156502	SUPV3L1	0.940703	1.93802e-08
	ENSG00000165355	FBXO33	0.939862	2.1487e-08
	ENSG00000111011	RSRC2	0.939856	2.15036e-08
	ENSG00000175197	DDIT3	0.939853	2.15113e-08
	ENSG00000153234	NR4A2	0.939497	2.246e-08
	ENSG00000124466	LYPD3	0.939397	2.27335e-08
	ENSG00000174738	NR1D2	0.939012	2.38132e-08
	ENSG00000108106	UBE2S	0.938991	2.38726e-08
	ENSG00000115758	ODC1	0.938412	2.55808e-08
	ENSG00000132661	NXT1	0.938128	2.64581e-08
	ENSG00000117036	ETV3	0.93785	2.73396e-08
	ENSG00000148841	ITPRIP	0.937731	2.77267e-08
	ENSG00000177426	TGIF1	0.937553	2.83113e-08
	ENSG00000197279	ZNF165	0.937118	2.9784e-08
	ENSG00000197989	SNHG12	0.936885	3.06015e-08
	ENSG00000166920	C15orf48	0.936824	3.08202e-08
	ENSG00000185668	POU3F1	0.936673	3.1362e-08
	ENSG00000164691	TAGAP	0.936568	3.17446e-08
	ENSG00000198355	PIM3	0.936358	3.25225e-08
	ENSG00000143751	SDE2	0.935877	3.43609e-08
	ENSG00000090339	ICAM1	0.935752	3.48561e-08
	ENSG00000143507	DUSP10	0.935633	3.53277e-08
	ENSG00000171612	SLC25A33	0.935417	3.62063e-08
	ENSG00000095739	BAMBI	0.935362	3.64304e-08
	ENSG00000154640	BTG3	0.935348	3.64897e-08
	ENSG00000101447	FAM83D	0.933856	4.31095e-08
	ENSG00000160789	LMNA	0.933145	4.66074e-08
	ENSG00000110848	CD69	0.932966	4.75275e-08
	ENSG00000169508	GPR183	0.932879	4.79832e-08
	ENSG00000135070	ISCA1	0.932657	4.91524e-08
	ENSG00000163661	PTX3	0.932628	4.93065e-08
	ENSG00000186352	ANKRD37	0.932087	5.227e-08
	ENSG00000160908	ZNF394	0.931945	5.30733e-08
	ENSG00000163877	SNIP1	0.931612	5.49979e-08
	ENSG00000113448	PDE4D	0.931383	5.63581e-08
	ENSG00000144802	NFKBIZ	0.930854	5.96083e-08
	ENSG00000109321	AREG	0.930517	6.17617e-08
	ENSG00000154359	LONRF1	0.929027	7.20904e-08
	ENSG00000100483	VCPKMT	0.928374	7.70697e-08
	ENSG00000172602	RND1	0.92831	7.75735e-08
	ENSG00000152409	JMY	0.927856	8.12226e-08
	ENSG00000125657	TNFSF9	0.927511	8.41038e-08
	ENSG00000103121	CMC2	0.927471	8.44389e-08
	ENSG00000230844	ZNF674-AS1	0.927457	8.45571e-08
	ENSG00000171522	PTGER4	0.927372	8.52784e-08
	ENSG00000116560	SFPQ	0.927291	8.5977e-08
	ENSG00000137267	TUBB2A	0.927262	8.6226e-08
	ENSG00000123358	NR4A1	0.927212	8.66576e-08
	ENSG00000113811	SELENOK	0.927023	8.83117e-08
	ENSG00000119508	NR4A3	0.927008	8.84468e-08
	ENSG00000078804	TP53INP2	0.926501	9.30182e-08
	ENSG00000280138	NA	0.926451	9.34782e-08
	ENSG00000131263	RLIM	0.926408	9.38743e-08
	ENSG00000124216	SNAI1	0.925669	1.00966e-07
	ENSG00000120709	FAM53C	0.925659	1.01065e-07
	ENSG00000158480	SPATA2	0.924489	1.13231e-07
	ENSG00000056586	RC3H2	0.924292	1.15393e-07
	ENSG00000173276	ZBTB21	0.923823	1.20695e-07
	ENSG00000100523	DDHD1	0.923544	1.23945e-07
	ENSG00000179820	MYADM	0.923118	1.29062e-07
	ENSG00000108179	PPIF	0.922904	1.31701e-07
	ENSG00000092820	EZR	0.922832	1.32598e-07
	ENSG00000117143	UAP1	0.922549	1.36167e-07
	ENSG00000259600	NA	0.92241	1.37957e-07
	ENSG00000164949	GEM	0.92195	1.44019e-07
	ENSG00000114315	HES1	0.921713	1.47221e-07
	ENSG00000151327	FAM177A1	0.92101	1.57108e-07
	ENSG00000139289	PHLDA1	0.920772	1.60572e-07
	ENSG00000235677	NA	0.920612	1.62944e-07
	ENSG00000116752	BCAS2	0.920401	1.66122e-07
	ENSG00000136504	KAT7	0.920155	1.69881e-07
	ENSG00000162772	ATF3	0.920084	1.70979e-07
	ENSG00000132780	NASP	0.919864	1.74443e-07
	ENSG00000131015	ULBP2	0.919513	1.80062e-07
	ENSG00000259379	MTND5P32	0.918697	1.93734e-07
	ENSG00000124882	EREG	0.918309	2.00562e-07
	ENSG00000095574	IKZF5	0.918262	2.01384e-07
	ENSG00000125538	IL1B	0.917495	2.15512e-07
	ENSG00000076604	TRAF4	0.917493	2.15562e-07
	ENSG00000081041	CXCL2	0.916594	2.33176e-07
	ENSG00000128272	ATF4	0.916268	2.39863e-07
	ENSG00000255717	SNHG1	0.916072	2.43969e-07
	ENSG00000159388	BTG2	0.916043	2.44596e-07
	ENSG00000136159	NUDT15	0.915852	2.48637e-07
	ENSG00000137449	CPEB2	0.91577	2.50409e-07
	ENSG00000173889	PHC3	0.915543	2.55335e-07
	ENSG00000132823	OSER1	0.915457	2.57241e-07
	ENSG00000115165	CYTIP	0.91516	2.6385e-07
	ENSG00000125740	FOSB	0.915075	2.6579e-07
	ENSG00000172893	DHCR7	0.914726	2.73804e-07
	ENSG00000076053	RBM7	0.914663	2.75279e-07
	ENSG00000237989	LINC01679	0.914322	2.83327e-07
	ENSG00000167604	NFKBID	0.913958	2.92185e-07
	ENSG00000168066	SF1	0.913909	2.93379e-07
	ENSG00000198435	NRARP	0.913881	2.9407e-07
	ENSG00000118985	ELL2	0.91377	2.96822e-07
	ENSG00000109320	NFKB1	0.913688	2.98889e-07
	ENSG00000165732	DDX21	0.912741	3.23466e-07
	ENSG00000197329	PELI1	0.912722	3.23965e-07
	ENSG00000169155	ZBTB43	0.912648	3.2596e-07
	ENSG00000157514	TSC22D3	0.912563	3.28266e-07
	ENSG00000161835	TAMALIN	0.911872	3.47523e-07
	ENSG00000174010	KLHL15	0.911216	3.66668e-07
	ENSG00000123689	G0S2	0.911166	3.6818e-07
	ENSG00000089737	DDX24	0.910973	3.73994e-07
	ENSG00000069399	BCL3	0.910964	3.74274e-07
	ENSG00000163806	SPDYA	0.910758	3.80592e-07
	ENSG00000059769	DNAJC25	0.910741	3.81112e-07
	ENSG00000085978	ATG16L1	0.908732	4.4765e-07
	ENSG00000131408	NR1H2	0.908683	4.49389e-07
	ENSG00000099985	OSM	0.908647	4.50688e-07
	ENSG00000117394	SLC2A1	0.908434	4.58332e-07
	ENSG00000105835	NAMPT	0.908411	4.59174e-07
	ENSG00000170852	KBTBD2	0.908186	4.67374e-07
	ENSG00000103257	SLC7A5	0.908089	4.70964e-07
	ENSG00000168209	DDIT4	0.90799	4.7466e-07
	ENSG00000170525	PFKFB3	0.907922	4.77191e-07
	ENSG00000203667	COX20	0.907697	4.85684e-07
	ENSG00000131051	RBM39	0.906983	5.13488e-07
	ENSG00000125347	IRF1	0.905975	5.55054e-07
	ENSG00000126524	SBDS	0.905907	5.57946e-07
	ENSG00000137478	FCHSD2	0.905887	5.58774e-07
	ENSG00000146278	PNRC1	0.905817	5.61805e-07
	ENSG00000065675	PRKCQ	0.905542	5.73759e-07
	ENSG00000158792	SPATA2L	0.905471	5.76885e-07
	ENSG00000285976	PTP4A1	0.905243	5.86983e-07
	ENSG00000229502	NA	0.904555	6.18442e-07
	ENSG00000069956	MAPK6	0.904524	6.19882e-07
	ENSG00000131188	PRR7	0.904334	6.28871e-07
	ENSG00000143333	RGS16	0.903689	6.60103e-07
	ENSG00000273559	CWC25	0.90322	6.83627e-07
	ENSG00000144597	EAF1	0.90317	6.86178e-07
	ENSG00000141582	CBX4	0.903074	6.91107e-07
	ENSG00000128590	DNAJB9	0.902906	6.99775e-07
	ENSG00000059728	MXD1	0.902792	7.05727e-07
	ENSG00000170881	RNF139	0.902636	7.13929e-07
	ENSG00000104825	NFKBIB	0.902547	7.18637e-07
	ENSG00000115548	KDM3A	0.901825	7.57907e-07
	ENSG00000186480	INSIG1	0.90054	8.32381e-07
	ENSG00000253372	NA	0.90017	8.54899e-07
	ENSG00000163600	ICOS	0.900029	8.63679e-07
	ENSG00000123610	TNFAIP6	0.899968	8.67473e-07
	ENSG00000173120	KDM2A	0.899909	8.71184e-07
	ENSG00000029363	BCLAF1	0.899803	8.77787e-07
	ENSG00000275302	CCL4	0.899453	9.00111e-07
	ENSG00000232656	IDI2-AS1	0.899358	9.06294e-07
	ENSG00000261526	NA	0.899094	9.23509e-07
	ENSG00000104312	RIPK2	0.898307	9.76669e-07
	ENSG00000134531	EMP1	0.897059	1.06618e-06
	ENSG00000162711	NLRP3	0.896914	1.07707e-06
	ENSG00000139112	GABARAPL1	0.896477	1.11036e-06
	ENSG00000130766	SESN2	0.896469	1.11093e-06
	ENSG00000115239	ASB3	0.895912	1.15465e-06
	ENSG00000110367	DDX6	0.895807	1.163e-06
	ENSG00000005486	RHBDD2	0.89495	1.23353e-06
	ENSG00000170542	SERPINB9	0.894522	1.27013e-06
	ENSG00000163734	CXCL3	0.894499	1.27208e-06
	ENSG00000164211	STARD4	0.894126	1.30477e-06
	ENSG00000213145	CRIP1	0.89406	1.31063e-06
	ENSG00000175906	ARL4D	0.893967	1.31889e-06
	ENSG00000198576	ARC	0.89336	1.37415e-06
	ENSG00000011422	PLAUR	0.893324	1.37742e-06
	ENSG00000076382	SPAG5	0.893158	1.39295e-06
	ENSG00000127824	TUBA4A	0.893098	1.3985e-06
	ENSG00000117000	RLF	0.892965	1.41107e-06
	ENSG00000138757	G3BP2	0.892188	1.48626e-06
	ENSG00000115009	CCL20	0.892093	1.49566e-06
	ENSG00000179094	PER1	0.891732	1.532e-06
	ENSG00000279086	NA	0.891429	1.56296e-06
	ENSG00000287789	NA	0.891253	1.5813e-06
	ENSG00000076321	KLHL20	0.890967	1.61136e-06
	ENSG00000101665	SMAD7	0.890933	1.615e-06
	ENSG00000139572	GPR84	0.890769	1.6324e-06
	ENSG00000206560	ANKRD28	0.890617	1.64885e-06
	ENSG00000177432	NAP1L5	0.890334	1.67962e-06
	ENSG00000166963	MAP1A	0.889833	1.73548e-06
	ENSG00000173575	CHD2	0.889784	1.74101e-06
	ENSG00000099860	GADD45B	0.889399	1.78502e-06
	ENSG00000173391	OLR1	0.889037	1.82739e-06
	ENSG00000134480	CCNH	0.888682	1.86971e-06
	ENSG00000162783	IER5	0.888638	1.87494e-06
	ENSG00000119138	KLF9	0.888587	1.8811e-06
	ENSG00000007944	MYLIP	0.888375	1.90697e-06
	ENSG00000141682	PMAIP1	0.88801	1.95207e-06
	ENSG00000146457	WTAP	0.887798	1.97869e-06
	ENSG00000230551	NA	0.88768	1.99359e-06
	ENSG00000186162	CIDECP1	0.887443	2.02391e-06
	ENSG00000114439	BBX	0.887184	2.05752e-06
	ENSG00000165195	PIGA	0.886992	2.08274e-06
	ENSG00000107968	MAP3K8	0.886974	2.08508e-06
	ENSG00000158122	PRXL2C	0.886738	2.11652e-06
	ENSG00000279529	NA	0.885862	2.23656e-06
	ENSG00000204186	ZDBF2	0.885803	2.2448e-06
	ENSG00000234741	GAS5	0.885777	2.24842e-06
	ENSG00000023608	SNAPC1	0.884844	2.38329e-06
	ENSG00000153922	CHD1	0.88483	2.38537e-06
	ENSG00000155252	PI4K2A	0.884796	2.39029e-06
	ENSG00000187742	SECISBP2	0.884092	2.49672e-06
	ENSG00000253320	NA	0.883911	2.52475e-06
	ENSG00000120158	RCL1	0.883629	2.56902e-06
	ENSG00000155307	SAMSN1	0.883553	2.58103e-06
	ENSG00000143479	DYRK3	0.883235	2.63186e-06
	ENSG00000182957	SPATA13	0.882231	2.79793e-06
	ENSG00000286223	NA	0.881394	2.94313e-06
	ENSG00000127528	KLF2	0.881343	2.95207e-06
	ENSG00000168386	FILIP1L	0.88129	2.96159e-06
	ENSG00000213753	CENPBD1P1	0.881143	2.98787e-06
	ENSG00000171793	CTPS1	0.881102	2.9953e-06
	ENSG00000232956	SNHG15	0.880908	3.03029e-06
	ENSG00000167470	MIDN	0.880536	3.09858e-06
	ENSG00000168140	VASN	0.880473	3.1102e-06
	ENSG00000100644	HIF1A	0.880385	3.12668e-06
	ENSG00000178623	GPR35	0.880046	3.19046e-06
	ENSG00000196757	ZNF700	0.878972	3.39998e-06
	ENSG00000138821	SLC39A8	0.878883	3.4178e-06
	ENSG00000204386	NEU1	0.878408	3.51468e-06
	ENSG00000260942	CAPN10-DT	0.878148	3.56855e-06
	ENSG00000121671	CRY2	0.878067	3.58567e-06
	ENSG00000141232	TOB1	0.877024	3.81018e-06
	ENSG00000013588	GPRC5A	0.876738	3.8736e-06
	ENSG00000125812	GZF1	0.875927	4.05906e-06
	ENSG00000100664	EIF5	0.87521	4.2291e-06
	ENSG00000019995	ZRANB1	0.873245	4.72684e-06
	ENSG00000168036	CTNNB1	0.873202	4.7382e-06
	ENSG00000196878	LAMB3	0.873191	4.74103e-06
	ENSG00000139438	FAM222A	0.8727	4.87322e-06
	ENSG00000188229	TUBB4B	0.87246	4.93913e-06
	ENSG00000269893	SNHG8	0.871961	5.07825e-06
	ENSG00000034533	ASTE1	0.87174	5.14098e-06
	ENSG00000130164	LDLR	0.870757	5.42753e-06
	ENSG00000089818	NECAP1	0.870623	5.46768e-06
	ENSG00000273015	NA	0.870196	5.59737e-06
	ENSG00000130522	JUND	0.869627	5.77406e-06
	ENSG00000034677	RNF19A	0.869385	5.8507e-06
	ENSG00000101901	ALG13	0.869299	5.87822e-06
	ENSG00000152242	C18orf25	0.86913	5.93237e-06
	ENSG00000165474	GJB2	0.869024	5.96659e-06
	ENSG00000107771	CCSER2	0.868258	6.21869e-06
	ENSG00000156671	SAMD8	0.868188	6.24246e-06
	ENSG00000152944	MED21	0.868137	6.25953e-06
	ENSG00000279765	NA	0.867778	6.3815e-06
	ENSG00000125245	GPR18	0.867695	6.41006e-06
	ENSG00000163399	ATP1A1	0.867591	6.44583e-06
	ENSG00000105939	ZC3HAV1	0.866965	6.66528e-06
	ENSG00000124731	TREM1	0.866658	6.77522e-06
	ENSG00000136108	CKAP2	0.866543	6.81667e-06
	ENSG00000051108	HERPUD1	0.866456	6.84828e-06
	ENSG00000259354	NA	0.866403	6.86752e-06
	ENSG00000115520	COQ10B	0.866398	6.86955e-06
	ENSG00000124762	CDKN1A	0.866381	6.87577e-06
	ENSG00000137507	LRRC32	0.865807	7.08799e-06
	ENSG00000108510	MED13	0.865732	7.11605e-06
	ENSG00000123975	CKS2	0.865224	7.30937e-06
	ENSG00000151729	SLC25A4	0.865053	7.37545e-06
	ENSG00000138386	NAB1	0.864968	7.40845e-06
	ENSG00000073756	PTGS2	0.864523	7.58309e-06
	ENSG00000069667	RORA	0.864124	7.74309e-06
	ENSG00000237513	NA	0.864043	7.77562e-06
	ENSG00000138074	SLC5A6	0.863536	7.98337e-06
	ENSG00000250069	NA	0.86345	8.01939e-06
	ENSG00000184205	TSPYL2	0.863108	8.16279e-06
	ENSG00000245149	RNF139-AS1	0.863036	8.19302e-06
	ENSG00000186431	FCAR	0.862703	8.33531e-06
	ENSG00000105509	HAS1	0.862627	8.36786e-06
	ENSG00000102554	KLF5	0.862495	8.42513e-06
	ENSG00000064703	DDX20	0.862416	8.45961e-06
	ENSG00000136603	SKIL	0.862297	8.51155e-06
	ENSG00000182950	ODF3L1	0.862135	8.58276e-06
	ENSG00000086061	DNAJA1	0.862108	8.59425e-06
	ENSG00000176531	PHLDB3	0.861574	8.8328e-06
	ENSG00000168795	ZBTB5	0.861374	8.92372e-06
	ENSG00000116731	PRDM2	0.861263	8.9745e-06
	ENSG00000105778	AVL9	0.861041	9.07637e-06
	ENSG00000196352	CD55	0.86101	9.09066e-06
	ENSG00000163659	TIPARP	0.860771	9.20184e-06
	ENSG00000235299	MRPL53P1	0.859613	9.75731e-06
	ENSG00000161547	SRSF2	0.859581	9.77307e-06
	ENSG00000184557	SOCS3	0.859218	9.95307e-06
	ENSG00000231074	HCG18	0.859201	9.96149e-06
	ENSG00000075426	FOSL2	0.859125	9.99988e-06
	ENSG00000112972	HMGCS1	0.859003	1.00613e-05
	ENSG00000173933	RBM4	0.858923	1.01017e-05
	ENSG00000156603	MED19	0.858784	1.0172e-05
	ENSG00000163599	CTLA4	0.858692	1.02191e-05
	ENSG00000074054	CLASP1	0.858411	1.03639e-05
	ENSG00000166579	NDEL1	0.85813	1.05098e-05
	ENSG00000140379	BCL2A1	0.8578	1.06841e-05
	ENSG00000135870	RC3H1	0.857579	1.08021e-05
	ENSG00000171988	JMJD1C	0.857402	1.08973e-05
	ENSG00000125633	CCDC93	0.85734	1.09304e-05
	ENSG00000198742	SMURF1	0.857278	1.09645e-05
	ENSG00000145632	PLK2	0.856795	1.12291e-05
	ENSG00000179119	SPTY2D1	0.856494	1.13971e-05
	ENSG00000184277	TM2D3	0.856406	1.14465e-05
	ENSG00000220412	NA	0.856079	1.16318e-05
	ENSG00000123395	ATG101	0.85603	1.16598e-05
	ENSG00000197063	MAFG	0.855855	1.17601e-05
	ENSG00000135241	PNPLA8	0.855841	1.1768e-05
	ENSG00000136709	WDR33	0.855669	1.18675e-05
	ENSG00000136141	LRCH1	0.855579	1.19204e-05
	ENSG00000136689	IL1RN	0.855577	1.19215e-05
	ENSG00000132326	PER2	0.855521	1.19538e-05
	ENSG00000104756	KCTD9	0.854972	1.22782e-05
	ENSG00000171174	RBKS	0.854818	1.23704e-05
	ENSG00000120705	ETF1	0.854389	1.26309e-05
	ENSG00000133818	RRAS2	0.853283	1.33235e-05
	ENSG00000122482	ZNF644	0.852863	1.35949e-05
	ENSG00000145780	FEM1C	0.852596	1.37696e-05
	ENSG00000182831	C16orf72	0.85229	1.39727e-05
	ENSG00000129315	CCNT1	0.852287	1.39742e-05
	ENSG00000120875	DUSP4	0.85183	1.42819e-05
	ENSG00000198799	LRIG2	0.851762	1.43281e-05
	ENSG00000143514	TP53BP2	0.851364	1.46018e-05
	ENSG00000178726	THBD	0.851251	1.46804e-05
	ENSG00000121879	PIK3CA	0.85107	1.48067e-05
	ENSG00000102786	INTS6	0.850787	1.50061e-05
	ENSG00000092978	GPATCH2	0.850634	1.51146e-05
	ENSG00000126804	ZBTB1	0.850558	1.51683e-05
	ENSG00000059758	CDK17	0.850493	1.52155e-05
	ENSG00000215301	DDX3X	0.850375	1.52998e-05
	ENSG00000111859	NEDD9	0.850042	1.55418e-05
	ENSG00000121210	TMEM131L	0.84961	1.58592e-05
	ENSG00000236255	NA	0.849109	1.62353e-05
	ENSG00000173273	TNKS	0.848885	1.64059e-05
	ENSG00000155096	AZIN1	0.848831	1.64467e-05
	ENSG00000176845	METRNL	0.848471	1.67248e-05
	ENSG00000116679	IVNS1ABP	0.847971	1.71168e-05
	ENSG00000255112	CHMP1B	0.847928	1.71512e-05
	ENSG00000105722	ERF	0.847811	1.72439e-05
	ENSG00000185115	NSMCE3	0.847029	1.78766e-05
	ENSG00000173875	ZNF791	0.846498	1.8318e-05
	ENSG00000204020	LIPN	0.846403	1.83975e-05
	ENSG00000096654	ZNF184	0.84633	1.8459e-05
	ENSG00000094975	SUCO	0.846222	1.8551e-05
	ENSG00000197857	ZNF44	0.845373	1.92823e-05
	ENSG00000172071	EIF2AK3	0.845027	1.95874e-05
	ENSG00000172115	CYCS	0.844701	1.98791e-05
	ENSG00000096384	HSP90AB1	0.844669	1.99075e-05
	ENSG00000152413	HOMER1	0.844624	1.99484e-05
	ENSG00000198393	ZNF26	0.844545	2.00196e-05
	ENSG00000162642	C1orf52	0.844531	2.00325e-05
	ENSG00000135587	SMPD2	0.84349	2.09935e-05
	ENSG00000204590	GNL1	0.843435	2.10455e-05
	ENSG00000218018	RBM38-AS1	0.843314	2.11601e-05
	ENSG00000023445	BIRC3	0.842824	2.16285e-05
	ENSG00000168564	CDKN2AIP	0.842534	2.19104e-05
	ENSG00000163349	HIPK1	0.841894	2.25431e-05
	ENSG00000166592	RRAD	0.841794	2.26435e-05
	ENSG00000163376	KBTBD8	0.841495	2.29447e-05
	ENSG00000198382	UVRAG	0.841283	2.31613e-05
	ENSG00000113013	HSPA9	0.840905	2.35508e-05
	ENSG00000114446	IFT57	0.840838	2.36204e-05
	ENSG00000167378	IRGQ	0.840702	2.37629e-05
	ENSG00000147274	RBMX	0.840375	2.4107e-05
	ENSG00000248323	LUCAT1	0.840251	2.42377e-05
	ENSG00000133872	SARAF	0.840217	2.42745e-05
	ENSG00000215417	MIR17HG	0.840195	2.42977e-05
	ENSG00000170315	UBB	0.839974	2.45344e-05
	ENSG00000226167	AP4B1-AS1	0.83986	2.46574e-05
	ENSG00000064651	SLC12A2	0.839794	2.47283e-05
	ENSG00000150977	RILPL2	0.839734	2.47939e-05
	ENSG00000112941	TENT4A	0.839094	2.54953e-05
	ENSG00000106366	SERPINE1	0.839022	2.55761e-05
	ENSG00000100916	BRMS1L	0.838783	2.58432e-05
	ENSG00000181873	IBA57	0.838485	2.61795e-05
	ENSG00000176903	PNMA1	0.838438	2.62326e-05
	ENSG00000106635	BCL7B	0.838309	2.63796e-05
	ENSG00000158710	TAGLN2	0.838288	2.64033e-05
	ENSG00000135469	COQ10A	0.837576	2.72287e-05
	ENSG00000156875	MFSD14A	0.837521	2.72933e-05
	ENSG00000143384	MCL1	0.83737	2.74717e-05
	ENSG00000078589	P2RY10	0.837251	2.76121e-05
	ENSG00000102763	VWA8	0.837081	2.78153e-05
	ENSG00000175130	MARCKSL1	0.836604	2.83894e-05
	ENSG00000154479	CCDC173	0.835863	2.93031e-05
	ENSG00000182782	HCAR2	0.835684	2.95276e-05
	ENSG00000204070	SYS1	0.835676	2.95377e-05
	ENSG00000100276	RASL10A	0.835516	2.97394e-05
	ENSG00000121274	TENT4B	0.835178	3.01693e-05
	ENSG00000136044	APPL2	0.835163	3.01891e-05
	ENSG00000163660	CCNL1	0.83505	3.03336e-05
	ENSG00000122882	ECD	0.835005	3.03913e-05
	ENSG00000047634	SCML1	0.834875	3.05589e-05
	ENSG00000015479	MATR3	0.834794	3.06645e-05
	ENSG00000171453	POLR1C	0.834789	3.06704e-05
	ENSG00000123505	AMD1	0.833783	3.2e-05
	ENSG00000121797	CCRL2	0.833468	3.24269e-05
	ENSG00000275993	SIK1B	0.833176	3.28267e-05
	ENSG00000240616	RPS6P25	0.833147	3.28662e-05
	ENSG00000132510	KDM6B	0.832958	3.31274e-05
	ENSG00000179562	GCC1	0.832894	3.32153e-05
	ENSG00000033867	SLC4A7	0.832873	3.32444e-05
	ENSG00000134294	SLC38A2	0.832663	3.35376e-05
	ENSG00000150401	DCUN1D2	0.832016	3.44539e-05
	ENSG00000133639	BTG1	0.831616	3.50304e-05
	ENSG00000158711	ELK4	0.831593	3.50644e-05
	ENSG00000006652	IFRD1	0.831543	3.51379e-05
	ENSG00000109519	GRPEL1	0.831519	3.51726e-05
	ENSG00000179388	EGR3	0.831321	3.54613e-05
	ENSG00000083896	YTHDC1	0.830916	3.60602e-05
	ENSG00000279838	NA	0.830596	3.65393e-05
	ENSG00000176624	MEX3C	0.830457	3.67496e-05
	ENSG00000169914	OTUD3	0.830395	3.68427e-05
	ENSG00000080822	CLDND1	0.829906	3.75905e-05
	ENSG00000174373	RALGAPA1	0.829859	3.76625e-05
	ENSG00000132912	DCTN4	0.829133	3.87989e-05
	ENSG00000112081	SRSF3	0.828966	3.90645e-05
	ENSG00000086619	ERO1B	0.828951	3.90873e-05
	ENSG00000196470	SIAH1	0.828867	3.92222e-05
	ENSG00000173848	NET1	0.828844	3.92581e-05
	ENSG00000232810	TNF	0.82858	3.96832e-05
	ENSG00000153201	RANBP2	0.828046	4.05519e-05
	ENSG00000144659	SLC25A38	0.827896	4.08004e-05
	ENSG00000137075	RNF38	0.827414	4.16027e-05
	ENSG00000128918	ALDH1A2	0.827375	4.16683e-05
	ENSG00000136932	TRMO	0.827279	4.18305e-05
	ENSG00000138018	SELENOI	0.826703	4.28106e-05
	ENSG00000163904	SENP2	0.826311	4.34899e-05
	ENSG00000197579	TOPORS	0.826004	4.40287e-05
	ENSG00000113734	BNIP1	0.825966	4.40959e-05
	ENSG00000147874	HAUS6	0.825537	4.48582e-05
	ENSG00000115946	PNO1	0.825533	4.48656e-05
	ENSG00000134262	AP4B1	0.825483	4.49555e-05
	ENSG00000117616	RSRP1	0.824861	4.60811e-05
	ENSG00000134107	BHLHE40	0.824851	4.60994e-05
	ENSG00000135801	TAF5L	0.824554	4.66468e-05
	ENSG00000163938	GNL3	0.823765	4.81259e-05
	ENSG00000068745	IP6K2	0.823574	4.8491e-05
	ENSG00000196418	ZNF124	0.823093	4.94164e-05
	ENSG00000278909	NA	0.823031	4.95378e-05
	ENSG00000178199	ZC3H12D	0.822746	5.00957e-05
	ENSG00000178567	EPM2AIP1	0.822726	5.01347e-05
	ENSG00000108559	NUP88	0.822452	5.06755e-05
	ENSG00000102265	TIMP1	0.821939	5.17015e-05
	ENSG00000168906	MAT2A	0.821744	5.20965e-05
	ENSG00000102401	ARMCX3	0.821614	5.23613e-05
	ENSG00000135185	TMEM243	0.821467	5.26612e-05
	ENSG00000145675	PIK3R1	0.821367	5.28673e-05
	ENSG00000204599	TRIM39	0.82093	5.37717e-05
	ENSG00000164758	MED30	0.819938	5.58749e-05
	ENSG00000100941	PNN	0.81947	5.6891e-05
	ENSG00000135604	STX11	0.818124	5.99008e-05
	ENSG00000267002	NA	0.818119	5.99124e-05
	ENSG00000124406	ATP8A1	0.81771	6.08543e-05
	ENSG00000233016	SNHG7	0.817568	6.11834e-05
	ENSG00000259820	NA	0.817539	6.125e-05
	ENSG00000174485	DENND4A	0.817328	6.17436e-05
	ENSG00000163960	UBXN7	0.817026	6.24549e-05
	ENSG00000180008	SOCS4	0.816994	6.25308e-05
	ENSG00000101654	RNMT	0.816841	6.28945e-05
	ENSG00000085433	WDR47	0.816777	6.30472e-05
	ENSG00000224470	ATXN1L	0.81645	6.38316e-05
	ENSG00000179833	SERTAD2	0.816383	6.39908e-05
	ENSG00000048405	ZNF800	0.816299	6.41952e-05
	ENSG00000158615	PPP1R15B	0.816295	6.42039e-05
	ENSG00000124688	MAD2L1BP	0.815665	6.57467e-05
	ENSG00000188215	DCUN1D3	0.815206	6.68898e-05
	ENSG00000287535	NA	0.814494	6.86936e-05
	ENSG00000131725	WDR44	0.814343	6.90835e-05
	ENSG00000213073	CHP1P2	0.814249	6.93253e-05
	ENSG00000124193	SRSF6	0.814107	6.96936e-05
	ENSG00000156381	ANKRD9	0.813932	7.01491e-05
	ENSG00000100614	PPM1A	0.813781	7.05428e-05
	ENSG00000081181	ARG2	0.813729	7.06804e-05
	ENSG00000135164	DMTF1	0.81359	7.10471e-05
	ENSG00000116704	SLC35D1	0.81343	7.14691e-05
	ENSG00000117525	F3	0.813111	7.23202e-05
	ENSG00000245888	NSMCE1-DT	0.812453	7.40988e-05
	ENSG00000242048	LOC644090	0.812305	7.45052e-05
	ENSG00000081320	STK17B	0.812044	7.52249e-05
	ENSG00000113369	ARRDC3	0.811985	7.53888e-05
	ENSG00000168264	IRF2BP2	0.811871	7.57037e-05
	ENSG00000233058	NA	0.811617	7.6415e-05
	ENSG00000166881	NEMP1	0.811452	7.68792e-05
	ENSG00000163785	RYK	0.811276	7.7377e-05
	ENSG00000134109	EDEM1	0.811095	7.78895e-05
	ENSG00000112200	ZNF451	0.810502	7.95962e-05
	ENSG00000214029	ZNF891	0.810101	8.07681e-05
	ENSG00000114120	SLC25A36	0.809632	8.21558e-05
	ENSG00000256223	ZNF10	0.809293	8.31735e-05
	ENSG00000071073	MGAT4A	0.808781	8.47275e-05
	ENSG00000162664	ZNF326	0.808289	8.62428e-05
	ENSG00000125827	TMX4	0.80805	8.69901e-05
	ENSG00000240891	PLCXD2	0.80661	9.15928e-05
	ENSG00000109787	KLF3	0.80633	9.25122e-05
	ENSG00000102393	GLA	0.806235	9.28248e-05
	ENSG00000173545	ZNF622	0.8062	9.29405e-05
	ENSG00000180479	ZNF571	0.805995	9.36217e-05
	ENSG00000120694	HSPH1	0.805574	9.50323e-05
	ENSG00000182150	ERCC6L2	0.805538	9.51539e-05
	ENSG00000139793	MBNL2	0.805444	9.54706e-05
	ENSG00000047346	FAM214A	0.804411	9.90179e-05
	ENSG00000124789	NUP153	0.803803	0.00010116
	ENSG00000114423	CBLB	0.803617	0.000101821
	ENSG00000239305	RNF103	0.803363	0.000102735
	ENSG00000150347	ARID5B	0.803095	0.000103703
	ENSG00000141543	EIF4A3	0.802755	0.000104941
	ENSG00000089195	TRMT6	0.802715	0.000105087
	ENSG00000105321	CCDC9	0.802703	0.000105133
	ENSG00000133316	WDR74	0.802488	0.000105923
	ENSG00000169895	SYAP1	0.802281	0.000106689
	ENSG00000121621	KIF18A	0.802231	0.000106874
	ENSG00000177034	MTX3	0.801948	0.00010793
	ENSG00000175556	LONRF3	0.801273	0.00011049
	ENSG00000140455	USP3	0.800194	0.000114683
	ENSG00000108256	NUFIP2	0.800038	0.0001153
	ENSG00000139517	LNX2	0.799961	0.000115606
	ENSG00000116604	MEF2D	0.799919	0.00011577
	ENSG00000055483	USP36	0.799574	0.000117153
	ENSG00000023734	STRAP	0.798644	0.00012094
	ENSG00000169967	MAP3K2	0.798635	0.000120978
	ENSG00000258302	NA	0.797885	0.000124105
	ENSG00000172845	SP3	0.797733	0.00012475
	ENSG00000120063	GNA13	0.796904	0.000128302
	ENSG00000176225	RTTN	0.796683	0.000129261
	ENSG00000253522	MIR3142HG	0.796672	0.000129314
	ENSG00000070961	ATP2B1	0.796598	0.000129633
	ENSG00000048649	RSF1	0.796234	0.000131236
	ENSG00000270061	NA	0.796157	0.000131577
	ENSG00000255398	HCAR3	0.795871	0.000132849
	ENSG00000138767	CNOT6L	0.795664	0.000133775
	ENSG00000131013	PPIL4	0.794757	0.000137903
	ENSG00000284024	HSPA14	0.794304	0.000140006
	ENSG00000135048	CEMIP2	0.793918	0.000141814
	ENSG00000166024	R3HCC1L	0.793465	0.000143966
	ENSG00000173230	GOLGB1	0.793114	0.000145649
	ENSG00000112715	VEGFA	0.793093	0.000145752
	ENSG00000005187	ACSM3	0.793033	0.000146041
	ENSG00000213782	DDX47	0.792792	0.000147211
	ENSG00000261609	GAN	0.792444	0.000148913
	ENSG00000124151	NCOA3	0.792381	0.000149223
	ENSG00000155903	RASA2	0.792311	0.000149568
	ENSG00000124203	ZNF831	0.792218	0.000150027
	ENSG00000110172	CHORDC1	0.792074	0.000150743
	ENSG00000166012	TAF1D	0.791966	0.000151281
	ENSG00000276900	NA	0.791901	0.000151603
	ENSG00000100731	PCNX1	0.791779	0.000152212
	ENSG00000105856	HBP1	0.791707	0.000152572
	ENSG00000167842	MIS12	0.791629	0.000152963
	ENSG00000154781	CCDC174	0.791382	0.00015421
	ENSG00000215022	LOC100130357	0.791022	0.000156041
	ENSG00000003393	ALS2	0.790931	0.000156507
	ENSG00000060138	YBX3	0.790912	0.000156605
	ENSG00000120280	TASL	0.790872	0.000156811
	ENSG00000135999	EPC2	0.790774	0.000157312
	ENSG00000110944	IL23A	0.790561	0.000158414
	ENSG00000217128	FNIP1	0.789558	0.000163675
	ENSG00000275437	NA	0.789426	0.000164378
	ENSG00000168152	THAP9	0.788356	0.000170179
	ENSG00000162852	CNST	0.78834	0.000170268
	ENSG00000165410	CFL2	0.788284	0.000170574
	ENSG00000152207	CYSLTR2	0.788192	0.000171084
	ENSG00000271500	NA	0.78813	0.000171422
	ENSG00000198964	SGMS1	0.78808	0.000171699
	ENSG00000204387	SNHG32	0.787903	0.000172685
	ENSG00000096717	SIRT1	0.787621	0.00017426
	ENSG00000104671	DCTN6	0.787567	0.000174561
	ENSG00000112096	SOD2	0.786275	0.000181942
	ENSG00000113070	HBEGF	0.786072	0.000183127
	ENSG00000260233	NA	0.786066	0.000183165
	ENSG00000156650	KAT6B	0.785704	0.000185289
	ENSG00000198315	ZKSCAN8	0.785559	0.000186146
	ENSG00000153094	BCL2L11	0.785099	0.000188894
	ENSG00000285103	NA	0.785	0.000189484
	ENSG00000116761	CTH	0.784094	0.000195002
	ENSG00000158019	BABAM2	0.783652	0.000197741
	ENSG00000204348	DXO	0.783157	0.000200847
	ENSG00000259924	NA	0.782729	0.000203568
	ENSG00000179454	KLHL28	0.781862	0.000209168
	ENSG00000148926	ADM	0.781214	0.00021344
	ENSG00000105708	ZNF14	0.781107	0.000214148
	ENSG00000204406	MBD5	0.780678	0.000217026
	ENSG00000072858	SIDT1	0.780584	0.000217655
	ENSG00000135334	AKIRIN2	0.780367	0.000219125
	ENSG00000169762	TAPT1	0.779029	0.000228375
	ENSG00000008294	SPAG9	0.778967	0.000228812
	ENSG00000185947	ZNF267	0.778819	0.000229855
	ENSG00000112378	PERP	0.778672	0.000230901
	ENSG00000183484	GPR132	0.778649	0.000231062
	ENSG00000136634	IL10	0.778547	0.000231789
	ENSG00000197021	EOLA2	0.778231	0.000234048
	ENSG00000150787	PTS	0.777926	0.000236243
	ENSG00000266053	NDUFV2-AS1	0.777903	0.000236409
	ENSG00000181722	ZBTB20	0.777672	0.000238088
	ENSG00000124145	SDC4	0.777661	0.000238168
	ENSG00000214765	SEPTIN7P2	0.777617	0.000238489
	ENSG00000100036	SLC35E4	0.777349	0.000240449
	ENSG00000156675	RAB11FIP1	0.776429	0.000247289
	ENSG00000101445	PPP1R16B	0.776092	0.000249831
	ENSG00000204388	HSPA1B	0.776081	0.000249916
	ENSG00000114796	KLHL24	0.776054	0.000250121
	ENSG00000181472	ZBTB2	0.775862	0.000251579
	ENSG00000144741	SLC25A26	0.775825	0.000251861
	ENSG00000183864	TOB2	0.775815	0.00025194
	ENSG00000085382	HACE1	0.775488	0.000254445
	ENSG00000143322	ABL2	0.775381	0.000255271
	ENSG00000165322	ARHGAP12	0.775019	0.000258074
	ENSG00000137094	DNAJB5	0.774884	0.000259132
	ENSG00000155926	SLA	0.774768	0.00026004
	ENSG00000052749	RRP12	0.774656	0.000260918
	ENSG00000113916	BCL6	0.774425	0.000262741
	ENSG00000100226	GTPBP1	0.774001	0.00026611
	ENSG00000163291	PAQR3	0.77379	0.000267802
	ENSG00000145715	RASA1	0.773558	0.000269665
	ENSG00000109381	ELF2	0.773467	0.000270404
	ENSG00000176105	YES1	0.773227	0.00027235
	ENSG00000146834	MEPCE	0.771978	0.000282691
	ENSG00000166747	AP1G1	0.7713	0.000288438
	ENSG00000168496	FEN1	0.770655	0.000293996
	ENSG00000153107	ANAPC1	0.770222	0.000297781
	ENSG00000163602	RYBP	0.769581	0.000303448
	ENSG00000117479	SLC19A2	0.769363	0.000305399
	ENSG00000101460	MAP1LC3A	0.769322	0.000305763
	ENSG00000258424	NA	0.768376	0.00031436
	ENSG00000272341	NA	0.768222	0.00031577
	ENSG00000184602	SNN	0.767634	0.000321236
	ENSG00000065243	PKN2	0.767258	0.000324765
	ENSG00000151553	FAM160B1	0.766584	0.000331179
	ENSG00000197780	TAF13	0.766322	0.000333699
	ENSG00000133657	ATP13A3	0.766044	0.000336392
	ENSG00000154710	RABGEF1	0.765912	0.00033768
	ENSG00000176142	TMEM39A	0.765907	0.000337726
	ENSG00000033170	FUT8	0.765423	0.000342477
	ENSG00000119778	ATAD2B	0.765147	0.000345207
	ENSG00000114529	C3orf52	0.763802	0.000358782
	ENSG00000176160	HSF5	0.763757	0.000359241
	ENSG00000160588	MPZL3	0.763355	0.000363396
	ENSG00000123091	RNF11	0.76314	0.00036562
	ENSG00000176853	FAM91A1	0.762881	0.000368333
	ENSG00000213047	DENND1B	0.762727	0.000369954
	ENSG00000174840	PDE12	0.762185	0.000375685
	ENSG00000286138	NA	0.761961	0.000378079
	ENSG00000115109	EPB41L5	0.761687	0.000381031
	ENSG00000115504	EHBP1	0.761526	0.000382763
	ENSG00000286864	NA	0.761059	0.000387845
	ENSG00000196950	SLC39A10	0.760493	0.000394088
	ENSG00000228261	NA	0.760425	0.000394839
	ENSG00000171827	ZNF570	0.760347	0.000395706
	ENSG00000120539	MASTL	0.759811	0.000401708
	ENSG00000152518	ZFP36L2	0.759621	0.000403856
	ENSG00000011566	MAP4K3	0.759347	0.000406962
	ENSG00000008869	HEATR5B	0.759164	0.000409051
	ENSG00000166233	ARIH1	0.75903	0.00041059
	ENSG00000234444	ZNF736	0.758996	0.000410978
	ENSG00000214756	CSKMT	0.758612	0.000415407
	ENSG00000164327	RICTOR	0.75859	0.000415662
	ENSG00000204524	ZNF805	0.758547	0.000416166
	ENSG00000165685	TMEM52B	0.757933	0.000423343
	ENSG00000206573	THUMPD3-AS1	0.757416	0.000429466
	ENSG00000133794	ARNTL	0.756521	0.000440242
	ENSG00000248643	RBM14-RBM4	0.756287	0.000443092
	ENSG00000135913	USP37	0.756199	0.000444173
	ENSG00000101935	AMMECR1	0.756181	0.000444393
	ENSG00000163635	ATXN7	0.756161	0.000444636
	ENSG00000155090	KLF10	0.756104	0.000445329
	ENSG00000260727	SLC7A5P1	0.754489	0.000465537
	ENSG00000153207	AHCTF1	0.75428	0.000468204
	ENSG00000083799	CYLD	0.754279	0.000468217
	ENSG00000108021	TASOR2	0.754175	0.000469553
	ENSG00000196911	KPNA5	0.753939	0.000472588
	ENSG00000143924	EML4	0.753786	0.000474562
	ENSG00000166197	NOLC1	0.753261	0.000481401
	ENSG00000139190	VAMP1	0.753149	0.000482871
	ENSG00000259161	NA	0.753122	0.000483223
	ENSG00000151690	MFSD6	0.753041	0.000484295
	ENSG00000104856	RELB	0.752474	0.0004918
	ENSG00000167680	SEMA6B	0.751317	0.000507433
	ENSG00000131669	NINJ1	0.751272	0.000508054
	ENSG00000105373	NOP53	0.751227	0.000508663
	ENSG00000001167	NFYA	0.750435	0.000519631
	ENSG00000187860	CCDC157	0.749442	0.000533643
	ENSG00000105643	ARRDC2	0.748936	0.000540912
	ENSG00000258890	CEP95	0.748742	0.000543715
	ENSG00000177875	CCDC184	0.74874	0.00054375
	ENSG00000276070	CCL4L2	0.748713	0.000544137
	ENSG00000167258	CDK12	0.748532	0.000546773
	ENSG00000095951	HIVEP1	0.748318	0.00054989
	ENSG00000139722	VPS37B	0.74806	0.000553675
	ENSG00000095397	WHRN	0.74802	0.000554268
	ENSG00000166432	ZMAT1	0.74732	0.00056466
	ENSG00000270344	NA	0.747178	0.000566788
	ENSG00000087245	MMP2	0.747051	0.000568698
	ENSG00000175265	GOLGA8A	0.746808	0.000572353
	ENSG00000130222	GADD45G	0.745846	0.000587065
	ENSG00000153066	TXNDC11	0.745172	0.000597556
	ENSG00000109189	USP46	0.744918	0.000601541
	ENSG00000251022	THAP9-AS1	0.744487	0.000608379
	ENSG00000203709	NA	0.744276	0.000611744
	ENSG00000198517	MAFK	0.743652	0.00062178
	ENSG00000165312	OTUD1	0.743491	0.000624404
	ENSG00000197381	ADARB1	0.743471	0.000624727
	ENSG00000145241	CENPC	0.743264	0.000628103
	ENSG00000127914	AKAP9	0.742879	0.000634417
	ENSG00000171617	ENC1	0.742447	0.000641571
	ENSG00000213516	RBMXL1	0.742055	0.000648115
	ENSG00000089157	RPLP0	0.742032	0.000648495
	ENSG00000163811	WDR43	0.741992	0.000649178
	ENSG00000162924	REL	0.741742	0.00065338
	ENSG00000269858	EGLN2	0.741227	0.000662122
	ENSG00000011198	ABHD5	0.741213	0.000662362
	ENSG00000185728	YTHDF3	0.740941	0.000667021
	ENSG00000254554	NA	0.740807	0.000669325
	ENSG00000175376	EIF1AD	0.740735	0.000670574
	ENSG00000136244	IL6	0.740694	0.000671272
	ENSG00000118596	SLC16A7	0.740668	0.000671718
	ENSG00000156500	FAM122C	0.740649	0.000672046
	ENSG00000256087	ZNF432	0.739599	0.000690413
	ENSG00000155304	HSPA13	0.739448	0.000693076
	ENSG00000278540	ACACA	0.739406	0.000693833
	ENSG00000216490	IFI30	0.739148	0.000698407
	ENSG00000104824	HNRNPL	0.738747	0.000705596
	ENSG00000170471	RALGAPB	0.738722	0.000706042
	ENSG00000169991	IFFO2	0.738533	0.000709462
	ENSG00000065665	SEC61A2	0.738164	0.000716159
	ENSG00000138802	SEC24B	0.738091	0.000717498
	ENSG00000197632	SERPINB2	0.73808	0.000717698
	ENSG00000189266	PNRC2	0.737589	0.000726693
	ENSG00000183826	BTBD9	0.737459	0.000729105
	ENSG00000165288	BRWD3	0.737112	0.000735541
	ENSG00000124813	RUNX2	0.736919	0.000739136
	ENSG00000137265	IRF4	0.736859	0.000740265
	ENSG00000169826	CSGALNACT2	0.736729	0.0007427
	ENSG00000287736	PTCSC1	0.736687	0.000743483
	ENSG00000143367	TUFT1	0.736611	0.000744926
	ENSG00000167377	ZNF23	0.736563	0.00074582
	ENSG00000100393	EP300	0.736342	0.000749994
	ENSG00000147536	GINS4	0.736212	0.00075247
	ENSG00000231999	LRRC8C-DT	0.736143	0.000753782
	ENSG00000184481	FOXO4	0.735489	0.000766294
	ENSG00000269821	KCNQ1OT1	0.735233	0.000771238
	ENSG00000117318	ID3	0.735145	0.000772933
	ENSG00000186834	HEXIM1	0.734489	0.00078576
	ENSG00000273729	NA	0.734323	0.000789042
	ENSG00000106610	STAG3L4	0.733571	0.000803988
	ENSG00000112312	GMNN	0.733569	0.000804038
	ENSG00000196396	PTPN1	0.733473	0.000805959
	ENSG00000145495	MARCHF6	0.732688	0.000821874
	ENSG00000125084	WNT1	0.732195	0.000831986
	ENSG00000286153	NA	0.731516	0.000846079
	ENSG00000174607	UGT8	0.730842	0.000860283
	ENSG00000164169	PRMT9	0.730825	0.000860634
	ENSG00000197111	PCBP2	0.7305	0.00086755
	ENSG00000218565	LOC100129844	0.730477	0.000868057
	ENSG00000257957	QRSL1P3	0.730407	0.000869549
	ENSG00000071189	SNX13	0.72991	0.000880226
	ENSG00000115368	WDR75	0.729487	0.000889407
	ENSG00000167981	ZNF597	0.728836	0.0009037
	ENSG00000036549	ZZZ3	0.728444	0.000912397
	ENSG00000132522	GPS2	0.72822	0.000917401
	ENSG00000178053	MLF1	0.727446	0.000934848
	ENSG00000274275	NA	0.727195	0.000940564
	ENSG00000144674	GOLGA4	0.726924	0.000946759
	ENSG00000120278	PLEKHG1	0.725877	0.000971057
	ENSG00000189067	LITAF	0.725822	0.000972349
	ENSG00000178502	KLHL11	0.725571	0.000978249
	ENSG00000147162	OGT	0.725314	0.000984324
	ENSG00000137801	THBS1	0.725185	0.000987378
	ENSG00000090104	RGS1	0.724919	0.000993723
	ENSG00000287733	NA	0.7243	0.00100859
	ENSG00000076641	PAG1	0.724298	0.00100865
	ENSG00000186166	CENATAC	0.72415	0.00101224
	ENSG00000006607	FARP2	0.724044	0.0010148
	ENSG00000213090	SCYL2P1	0.723467	0.0010289
	ENSG00000117632	STMN1	0.723306	0.00103289
	ENSG00000103472	RRN3P2	0.721672	0.00107384
	ENSG00000234975	FTH1P2	0.721238	0.00108494
	ENSG00000173451	THAP2	0.721112	0.00108819
	ENSG00000276085	CCL3L1	0.72044	0.0011056
	ENSG00000010404	IDS	0.7203	0.00110926
	ENSG00000269984	NA	0.719621	0.00112715
	ENSG00000189007	ADAT2	0.719331	0.00113486
	ENSG00000087589	CASS4	0.718722	0.00115119
	ENSG00000133059	DSTYK	0.718705	0.00115164
	ENSG00000090061	CCNK	0.717814	0.00117589
	ENSG00000132952	USPL1	0.717218	0.00119234
	ENSG00000057657	PRDM1	0.716538	0.00121135
	ENSG00000172409	CLP1	0.716282	0.00121856
	ENSG00000122861	PLAU	0.716225	0.00122019
	ENSG00000165699	TSC1	0.715789	0.00123256
	ENSG00000056558	TRAF1	0.715319	0.00124604
	ENSG00000165494	PCF11	0.71525	0.00124804
	ENSG00000061676	NCKAP1	0.715215	0.00124905
	ENSG00000127666	TICAM1	0.7152	0.00124948
	ENSG00000144136	SLC20A1	0.715177	0.00125015
	ENSG00000165434	PGM2L1	0.714567	0.00126786
	ENSG00000119048	UBE2B	0.714132	0.00128062
	ENSG00000157557	ETS2	0.713846	0.00128906
	ENSG00000134444	RELCH	0.713653	0.00129478
	ENSG00000011295	TTC19	0.713308	0.00130508
	ENSG00000169118	CSNK1G1	0.713062	0.00131244
	ENSG00000130024	PHF10	0.712771	0.00132122
	ENSG00000180667	YOD1	0.712627	0.00132558
	ENSG00000085511	MAP3K4	0.711792	0.00135109
	ENSG00000166046	TCP11L2	0.71154	0.00135885
	ENSG00000132906	CASP9	0.711505	0.00135993
	ENSG00000167034	NKX3-1	0.711305	0.00136613
	ENSG00000287216	NA	0.711198	0.00136946
	ENSG00000065413	ANKRD44	0.710695	0.0013852
	ENSG00000170312	CDK1	0.710338	0.00139645
	ENSG00000247400	DNAJC3-DT	0.710071	0.00140491
	ENSG00000256683	ZNF350	0.710033	0.00140611
	ENSG00000235066	NA	0.709564	0.00142111
	ENSG00000170464	DNAJC18	0.708617	0.00145177
	ENSG00000072415	MPP5	0.708416	0.00145834
	ENSG00000137135	ARHGEF39	0.708397	0.00145896
	ENSG00000132334	PTPRE	0.708178	0.00146617
	ENSG00000106346	USP42	0.707777	0.0014794
	ENSG00000164056	SPRY1	0.707747	0.00148041
	ENSG00000134852	CLOCK	0.706461	0.00152358
	ENSG00000182768	NGRN	0.706401	0.00152563
	ENSG00000172345	STARD5	0.706293	0.0015293
	ENSG00000087074	PPP1R15A	0.706149	0.00153422
	ENSG00000197714	ZNF460	0.705961	0.00154065
	ENSG00000125772	GPCPD1	0.70593	0.00154172
	ENSG00000142528	ZNF473	0.705105	0.00157024
	ENSG00000117569	PTBP2	0.705075	0.00157127
	ENSG00000157764	BRAF	0.705033	0.00157274
	ENSG00000156804	FBXO32	0.704761	0.00158227
	ENSG00000188483	IER5L	0.704398	0.00159504
	ENSG00000198805	PNP	0.704189	0.0016024
	ENSG00000272449	NA	0.703795	0.0016164
	ENSG00000140287	HDC	0.703353	0.00163224
	ENSG00000160408	ST6GALNAC6	0.703348	0.00163243
	ENSG00000056277	ZNF280C	0.703048	0.00164325
	ENSG00000164953	TMEM67	0.702849	0.00165044
	ENSG00000070718	AP3M2	0.702259	0.00167198
	ENSG00000145375	SPATA5	0.701638	0.00169486
	ENSG00000213523	SRA1	0.701062	0.00171634
	ENSG00000100150	DEPDC5	0.700831	0.00172503
	ENSG00000073417	PDE8A	0.700551	0.0017356
	ENSG00000164920	OSR2	0.700467	0.00173878

## Sheet: brown
Supplementary Table 6: Complete list of hub genes identified for each non-preserved module
Hubgenes_info	Gene_id	Symbol	kMEbrown	kMEbrown_pvalue
369	ENSG00000119013	NDUFB3	0.955493	2.35334e-09
	ENSG00000112335	SNX3	0.948906	6.49874e-09
	ENSG00000166797	CIAO2A	0.948013	7.38209e-09
	ENSG00000124783	SSR1	0.940187	2.06509e-08
	ENSG00000041357	PSMA4	0.937142	2.97026e-08
	ENSG00000154723	ATP5PF	0.936686	3.13132e-08
	ENSG00000091164	TXNL1	0.935308	3.66539e-08
	ENSG00000139597	N4BP2L1	0.933484	4.49125e-08
	ENSG00000169019	COMMD8	0.932459	5.0216e-08
	ENSG00000086300	SNX10	0.928338	7.73534e-08
	ENSG00000139687	RB1	0.920666	1.62152e-07
	ENSG00000164405	UQCRQ	0.918457	1.97925e-07
	ENSG00000081087	OSTM1	0.916014	2.45203e-07
	ENSG00000134049	IER3IP1	0.916002	2.45451e-07
	ENSG00000057608	GDI2	0.915146	2.64172e-07
	ENSG00000139921	TMX1	0.913684	2.98989e-07
	ENSG00000139233	LLPH	0.913178	3.11914e-07
	ENSG00000232119	MCTS1	0.912438	3.31669e-07
	ENSG00000127951	FGL2	0.91227	3.36318e-07
	ENSG00000083223	TUT7	0.911839	3.48447e-07
	ENSG00000181061	HIGD1A	0.909089	4.35169e-07
	ENSG00000156261	CCT8	0.908635	4.51134e-07
	ENSG00000116459	ATP5PB	0.906918	5.16054e-07
	ENSG00000153310	CYRIB	0.90482	6.06156e-07
	ENSG00000188612	SUMO2	0.904662	6.13488e-07
	ENSG00000120265	PCMT1	0.903178	6.85782e-07
	ENSG00000170270	GON7	0.901762	7.61447e-07
	ENSG00000109536	FRG1	0.901733	7.63083e-07
	ENSG00000101132	PFDN4	0.901343	7.85176e-07
	ENSG00000165264	NDUFB6	0.899347	9.0701e-07
	ENSG00000241837	ATP5PO	0.898119	9.8967e-07
	ENSG00000172172	MRPL13	0.896891	1.07875e-06
	ENSG00000114850	SSR3	0.895119	1.21939e-06
	ENSG00000143183	TMCO1	0.895064	1.22399e-06
	ENSG00000067560	RHOA	0.89292	1.41533e-06
	ENSG00000100387	RBX1	0.892331	1.47217e-06
	ENSG00000110958	PTGES3	0.891281	1.57836e-06
	ENSG00000114978	MOB1A	0.890056	1.71036e-06
	ENSG00000111237	VPS29	0.889854	1.73308e-06
	ENSG00000118363	SPCS2	0.88976	1.74371e-06
	ENSG00000205352	PRR13	0.889479	1.77582e-06
	ENSG00000185088	RPS27L	0.889285	1.79831e-06
	ENSG00000163541	SUCLG1	0.888606	1.87878e-06
	ENSG00000121552	CSTA	0.885365	2.30717e-06
	ENSG00000114902	SPCS1	0.884768	2.39446e-06
	ENSG00000138385	SSB	0.883725	2.55384e-06
	ENSG00000116171	SCP2	0.883291	2.62285e-06
	ENSG00000198843	SELENOT	0.87936	3.32291e-06
	ENSG00000109854	HTATIP2	0.87697	3.82208e-06
	ENSG00000165629	ATP5F1C	0.875792	4.09073e-06
	ENSG00000162961	DPY30	0.875088	4.25866e-06
	ENSG00000164919	COX6C	0.873506	4.6579e-06
	ENSG00000100567	PSMA3	0.87257	4.90883e-06
	ENSG00000175324	LSM1	0.87191	5.09255e-06
	ENSG00000123609	NMI	0.871084	5.33075e-06
	ENSG00000129515	SNX6	0.870889	5.38845e-06
	ENSG00000125304	TM9SF2	0.870784	5.41959e-06
	ENSG00000050130	JKAMP	0.870738	5.43335e-06
	ENSG00000134717	BTF3L4	0.868749	6.05593e-06
	ENSG00000104325	DECR1	0.868412	6.16748e-06
	ENSG00000096968	JAK2	0.868298	6.20557e-06
	ENSG00000124795	DEK	0.86812	6.26534e-06
	ENSG00000100442	FKBP3	0.864613	7.54753e-06
	ENSG00000126067	PSMB2	0.863529	7.98656e-06
	ENSG00000162704	ARPC5	0.863354	8.0591e-06
	ENSG00000198258	UBL5	0.85944	9.84289e-06
	ENSG00000137752	CASP1	0.859137	9.9936e-06
	ENSG00000182165	NA	0.859027	1.0049e-05
	ENSG00000023318	ERP44	0.857551	1.08167e-05
	ENSG00000114209	PDCD10	0.857092	1.10657e-05
	ENSG00000163683	SMIM14	0.856295	1.15092e-05
	ENSG00000151366	NDUFC2	0.855904	1.17317e-05
	ENSG00000120656	TAF12	0.855888	1.17411e-05
	ENSG00000155115	GTF3C6	0.854881	1.23328e-05
	ENSG00000085491	SLC25A24	0.854555	1.25298e-05
	ENSG00000077380	DYNC1I2	0.853565	1.31442e-05
	ENSG00000005893	LAMP2	0.852321	1.39521e-05
	ENSG00000169139	UBE2V2	0.852122	1.40847e-05
	ENSG00000159256	MORC3	0.851753	1.43343e-05
	ENSG00000128789	PSMG2	0.851497	1.45097e-05
	ENSG00000198856	OSTC	0.85142	1.45629e-05
	ENSG00000178741	COX5A	0.851293	1.46506e-05
	ENSG00000092020	PPP2R3C	0.850412	1.52736e-05
	ENSG00000068366	ACSL4	0.849742	1.5762e-05
	ENSG00000156411	ATP5MPL	0.849668	1.58166e-05
	ENSG00000144034	TPRKB	0.848534	1.66756e-05
	ENSG00000143742	SRP9	0.848527	1.66812e-05
	ENSG00000115233	PSMD14	0.847899	1.71738e-05
	ENSG00000189043	NDUFA4	0.847894	1.71778e-05
	ENSG00000177879	AP3S1	0.84753	1.74689e-05
	ENSG00000101608	MYL12A	0.847183	1.77506e-05
	ENSG00000132432	SEC61G	0.84626	1.85182e-05
	ENSG00000167863	ATP5PD	0.845961	1.8773e-05
	ENSG00000165672	PRDX3	0.845591	1.90927e-05
	ENSG00000134001	EIF2S1	0.844754	1.98318e-05
	ENSG00000138760	SCARB2	0.844255	2.02835e-05
	ENSG00000136021	SCYL2	0.843252	2.12189e-05
	ENSG00000175606	TMEM70	0.843176	2.1291e-05
	ENSG00000111229	ARPC3	0.843164	2.13025e-05
	ENSG00000185862	EVI2B	0.842454	2.19888e-05
	ENSG00000168297	PXK	0.842188	2.22502e-05
	ENSG00000124767	GLO1	0.841096	2.33531e-05
	ENSG00000144118	RALB	0.839469	2.50823e-05
	ENSG00000182004	SNRPE	0.838643	2.6001e-05
	ENSG00000118680	MYL12B	0.838187	2.65194e-05
	ENSG00000138071	ACTR2	0.83559	2.96459e-05
	ENSG00000152229	PSTPIP2	0.835504	2.9754e-05
	ENSG00000120008	WDR11	0.834542	3.09924e-05
	ENSG00000076685	NT5C2	0.834108	3.15656e-05
	ENSG00000214114	MYCBP	0.833848	3.19129e-05
	ENSG00000104375	STK3	0.833577	3.22784e-05
	ENSG00000105967	TFEC	0.832371	3.39492e-05
	ENSG00000110768	GTF2H1	0.831925	3.4585e-05
	ENSG00000119203	CPSF3	0.831055	3.58548e-05
	ENSG00000113732	ATP6V0E1	0.830724	3.63471e-05
	ENSG00000075142	SRI	0.830453	3.67547e-05
	ENSG00000145494	NDUFS6	0.829616	3.804e-05
	ENSG00000196954	CASP4	0.829124	3.88121e-05
	ENSG00000198019	FCGR1B	0.82873	3.94418e-05
	ENSG00000106028	SSBP1	0.828722	3.94539e-05
	ENSG00000136147	PHF11	0.828186	4.0323e-05
	ENSG00000166801	FAM111A	0.828165	4.03563e-05
	ENSG00000125870	SNRPB2	0.827427	4.15799e-05
	ENSG00000002549	LAP3	0.826153	4.37662e-05
	ENSG00000117450	PRDX1	0.826126	4.38143e-05
	ENSG00000113532	ST8SIA4	0.825522	4.48851e-05
	ENSG00000176261	ZBTB8OS	0.824843	4.61154e-05
	ENSG00000214194	SMIM30	0.823637	4.837e-05
	ENSG00000100575	TIMM9	0.823506	4.86209e-05
	ENSG00000162441	LZIC	0.8234	4.88236e-05
	ENSG00000085719	CPNE3	0.823377	4.88688e-05
	ENSG00000177119	ANO6	0.822362	5.08545e-05
	ENSG00000189050	RNFT1	0.822086	5.14059e-05
	ENSG00000124172	ATP5F1E	0.821611	5.23678e-05
	ENSG00000116918	TSNAX	0.821301	5.30034e-05
	ENSG00000230989	HSBP1	0.820892	5.38526e-05
	ENSG00000111726	CMAS	0.819736	5.6313e-05
	ENSG00000243147	MRPL33	0.819618	5.65683e-05
	ENSG00000138029	HADHB	0.817413	6.15446e-05
	ENSG00000163565	IFI16	0.817137	6.21917e-05
	ENSG00000103769	RAB11A	0.814757	6.80224e-05
	ENSG00000243927	MRPS6	0.813899	7.02339e-05
	ENSG00000085871	MGST2	0.813835	7.04014e-05
	ENSG00000165704	HPRT1	0.813835	7.04022e-05
	ENSG00000136521	NDUFB5	0.813752	7.06188e-05
	ENSG00000140395	WDR61	0.813251	7.19445e-05
	ENSG00000124380	SNRNP27	0.812303	7.45099e-05
	ENSG00000086598	TMED2	0.812148	7.49365e-05
	ENSG00000134153	EMC7	0.812048	7.52123e-05
	ENSG00000182220	ATP6AP2	0.811787	7.59391e-05
	ENSG00000101347	SAMHD1	0.811017	7.81147e-05
	ENSG00000134248	LAMTOR5	0.811002	7.81559e-05
	ENSG00000049245	VAMP3	0.810784	7.87816e-05
	ENSG00000116030	SUMO1	0.809901	8.13571e-05
	ENSG00000164332	UBLCP1	0.809659	8.20748e-05
	ENSG00000070214	SLC44A1	0.809144	8.36231e-05
	ENSG00000166562	SEC11C	0.808922	8.42971e-05
	ENSG00000146386	ABRACL	0.807837	8.7656e-05
	ENSG00000173692	PSMD1	0.807835	8.76625e-05
	ENSG00000125977	EIF2S2	0.807579	8.84731e-05
	ENSG00000167283	ATP5MG	0.806149	9.31111e-05
	ENSG00000082515	MRPL22	0.806061	9.34017e-05
	ENSG00000086232	EIF2AK1	0.805745	9.44561e-05
	ENSG00000129625	REEP5	0.804446	9.88966e-05
	ENSG00000126858	RHOT1	0.803861	0.000100954
	ENSG00000117697	NSL1	0.803796	0.000101185
	ENSG00000140307	GTF2A2	0.803516	0.000102184
	ENSG00000215114	UBXN2B	0.803204	0.000103305
	ENSG00000124333	VAMP7	0.802873	0.000104509
	ENSG00000167088	SNRPD1	0.801865	0.000108242
	ENSG00000203705	TATDN3	0.800453	0.000113664
	ENSG00000138768	USO1	0.800268	0.000114392
	ENSG00000122873	CISD1	0.799349	0.000118057
	ENSG00000137767	SQOR	0.79904	0.000119313
	ENSG00000115128	SF3B6	0.79892	0.000119805
	ENSG00000137955	RABGGTB	0.798855	0.000120069
	ENSG00000205542	TMSB4X	0.797878	0.000124134
	ENSG00000196636	SDHAF3	0.797506	0.000125712
	ENSG00000123684	LPGAT1	0.796059	0.000132013
	ENSG00000161057	PSMC2	0.795771	0.000133294
	ENSG00000155330	C16orf87	0.794368	0.000139703
	ENSG00000204370	SDHD	0.794253	0.000140241
	ENSG00000164253	WDR41	0.794078	0.000141061
	ENSG00000163754	GYG1	0.794052	0.000141185
	ENSG00000114013	CD86	0.792715	0.000147589
	ENSG00000196664	TLR7	0.792302	0.000149615
	ENSG00000148444	COMMD3	0.792259	0.000149826
	ENSG00000183648	NDUFB1	0.791299	0.000154633
	ENSG00000111269	CREBL2	0.790398	0.00015926
	ENSG00000118939	UCHL3	0.790266	0.000159945
	ENSG00000163634	THOC7	0.790236	0.000160103
	ENSG00000172586	CHCHD1	0.789517	0.000163895
	ENSG00000122565	CBX3	0.789127	0.000165984
	ENSG00000174695	TMEM167A	0.78806	0.000171813
	ENSG00000125779	PANK2	0.787554	0.000174637
	ENSG00000092010	PSME1	0.787472	0.000175096
	ENSG00000165934	CPSF2	0.786809	0.00017886
	ENSG00000125356	NDUFA1	0.786696	0.000179512
	ENSG00000123131	PRDX4	0.785226	0.00018813
	ENSG00000204397	CARD16	0.784636	0.000191689
	ENSG00000147400	CETN2	0.784435	0.000192908
	ENSG00000112697	TMEM30A	0.784317	0.000193631
	ENSG00000137500	CCDC90B	0.783956	0.000195853
	ENSG00000122042	UBL3	0.783705	0.000197411
	ENSG00000131732	ZCCHC9	0.783477	0.000198836
	ENSG00000169599	NFU1	0.783031	0.000201645
	ENSG00000174125	TLR1	0.783006	0.000201803
	ENSG00000168288	MMADHC	0.781481	0.000211669
	ENSG00000127022	CANX	0.781086	0.000214287
	ENSG00000155099	PIP4P2	0.779633	0.000224163
	ENSG00000163131	CTSS	0.77947	0.000225293
	ENSG00000168404	MLKL	0.779113	0.000227788
	ENSG00000182287	AP1S2	0.779107	0.000227831
	ENSG00000084733	RAB10	0.778057	0.000235298
	ENSG00000004779	NDUFAB1	0.777896	0.000236459
	ENSG00000086065	CHMP5	0.777685	0.000237992
	ENSG00000173221	GLRX	0.77719	0.00024162
	ENSG00000183255	PTTG1IP	0.776279	0.000248414
	ENSG00000129534	MIS18BP1	0.776194	0.000249057
	ENSG00000171530	TBCA	0.775384	0.000255248
	ENSG00000100612	DHRS7	0.775045	0.000257872
	ENSG00000137210	TMEM14B	0.774921	0.000258839
	ENSG00000068912	ERLEC1	0.774554	0.000261719
	ENSG00000134046	MBD2	0.774509	0.000262071
	ENSG00000173198	CYSLTR1	0.77316	0.000272901
	ENSG00000183726	TMEM50A	0.77261	0.000277417
	ENSG00000102524	TNFSF13B	0.772556	0.00027787
	ENSG00000134755	DSC2	0.772077	0.000281862
	ENSG00000112695	COX7A2	0.771292	0.000288507
	ENSG00000123737	EXOSC9	0.771008	0.000290945
	ENSG00000166710	B2M	0.770808	0.000292666
	ENSG00000144635	DYNC1LI1	0.770374	0.000296445
	ENSG00000034510	TMSB10	0.770299	0.000297102
	ENSG00000149196	HIKESHI	0.770278	0.000297286
	ENSG00000155729	KCTD18	0.769863	0.000300942
	ENSG00000206527	HACD2	0.769582	0.000303439
	ENSG00000196230	TUBB	0.769315	0.000305825
	ENSG00000069974	RAB27A	0.769076	0.000307978
	ENSG00000070190	DAPP1	0.768858	0.000309953
	ENSG00000184752	NDUFA12	0.76874	0.000311024
	ENSG00000118257	NRP2	0.76838	0.000314319
	ENSG00000006007	GDE1	0.768127	0.000316652
	ENSG00000162976	SLC66A3	0.768016	0.000317676
	ENSG00000168275	COA6	0.767262	0.000324728
	ENSG00000119686	FLVCR2	0.766296	0.000333948
	ENSG00000023697	DERA	0.766213	0.000334757
	ENSG00000140374	ETFA	0.766194	0.000334936
	ENSG00000134440	NARS1	0.76508	0.000345877
	ENSG00000072401	UBE2D1	0.763976	0.000357006
	ENSG00000073969	NSF	0.763547	0.000361407
	ENSG00000159200	RCAN1	0.763412	0.000362802
	ENSG00000162645	GBP2	0.763124	0.00036579
	ENSG00000152291	TGOLN2	0.762753	0.000369679
	ENSG00000127947	PTPN12	0.762742	0.000369793
	ENSG00000136810	TXN	0.762597	0.00037132
	ENSG00000171155	C1GALT1C1	0.762119	0.000376392
	ENSG00000141428	C18orf21	0.760612	0.000392764
	ENSG00000154589	LY96	0.759428	0.000406042
	ENSG00000160213	CSTB	0.758489	0.000416839
	ENSG00000272047	GTF2H5	0.758146	0.000420835
	ENSG00000091483	FH	0.758121	0.000421131
	ENSG00000183621	ZNF438	0.757294	0.000430923
	ENSG00000005020	SKAP2	0.756853	0.000436216
	ENSG00000173418	NAA20	0.756783	0.000437066
	ENSG00000185651	UBE2L3	0.756676	0.000438356
	ENSG00000167004	PDIA3	0.756569	0.000439658
	ENSG00000134825	TMEM258	0.755267	0.000455708
	ENSG00000186132	C2orf76	0.755006	0.000458986
	ENSG00000188243	COMMD6	0.754414	0.000466487
	ENSG00000237765	FAM200B	0.754396	0.000466727
	ENSG00000173915	ATP5MD	0.753923	0.00047279
	ENSG00000102699	PARP4	0.753333	0.000480464
	ENSG00000119328	ABITRAM	0.752709	0.000488676
	ENSG00000084073	ZMPSTE24	0.751401	0.000506287
	ENSG00000172086	KRCC1	0.75071	0.000515797
	ENSG00000138175	ARL3	0.750522	0.000518413
	ENSG00000271122	LOC101930085	0.749544	0.000532195
	ENSG00000008324	SS18L2	0.74933	0.00053525
	ENSG00000241685	ARPC1A	0.7492	0.000537105
	ENSG00000169018	FEM1B	0.749192	0.00053722
	ENSG00000224152	NA	0.749162	0.000537659
	ENSG00000113583	C5orf15	0.747299	0.000564965
	ENSG00000078618	NRDC	0.746557	0.000576168
	ENSG00000197771	MCMBP	0.746003	0.000584637
	ENSG00000120860	WASHC3	0.745995	0.000584769
	ENSG00000104626	ERI1	0.745863	0.000586808
	ENSG00000147202	DIAPH2	0.74557	0.000591345
	ENSG00000189159	JPT1	0.745312	0.000595363
	ENSG00000138413	IDH1	0.744934	0.000601291
	ENSG00000164144	ARFIP1	0.74471	0.000604835
	ENSG00000163950	SLBP	0.744525	0.000607765
	ENSG00000182518	FAM104B	0.74426	0.000611993
	ENSG00000171497	PPID	0.743636	0.00062205
	ENSG00000129675	ARHGEF6	0.742473	0.000641134
	ENSG00000117151	CTBS	0.742391	0.000642491
	ENSG00000109133	TMEM33	0.742283	0.000644296
	ENSG00000151116	UEVLD	0.741761	0.000653059
	ENSG00000031691	CENPQ	0.741731	0.000653564
	ENSG00000116815	CD58	0.741396	0.00065924
	ENSG00000107651	SEC23IP	0.741167	0.000663149
	ENSG00000168118	RAB4A	0.741037	0.000665373
	ENSG00000171862	PTEN	0.739799	0.000686878
	ENSG00000228474	OST4	0.737633	0.000725896
	ENSG00000088930	XRN2	0.736754	0.000742223
	ENSG00000081721	DUSP12	0.735674	0.00076274
	ENSG00000140575	IQGAP1	0.735035	0.00077508
	ENSG00000117533	VAMP4	0.733028	0.000814955
	ENSG00000112303	VNN2	0.732549	0.000824711
	ENSG00000146476	ARMT1	0.730901	0.000859028
	ENSG00000102893	PHKB	0.730781	0.00086157
	ENSG00000009844	VTA1	0.730622	0.000864959
	ENSG00000163171	CDC42EP3	0.730035	0.000877534
	ENSG00000182512	GLRX5	0.729083	0.000898267
	ENSG00000148834	GSTO1	0.728987	0.000900365
	ENSG00000132341	RAN	0.726638	0.000953345
	ENSG00000121858	TNFSF10	0.726549	0.000955393
	ENSG00000108055	SMC3	0.726031	0.000967438
	ENSG00000100336	APOL4	0.725916	0.000970124
	ENSG00000139168	ZCRB1	0.725648	0.00097643
	ENSG00000111846	GCNT2	0.725328	0.000983986
	ENSG00000112367	FIG4	0.725043	0.000990769
	ENSG00000105887	MTPN	0.724879	0.00099467
	ENSG00000013374	NUB1	0.72469	0.000999204
	ENSG00000204272	NBDY	0.724614	0.00100102
	ENSG00000170855	TRIAP1	0.724366	0.00100701
	ENSG00000162813	BPNT1	0.7242	0.00101102
	ENSG00000147679	UTP23	0.724104	0.00101336
	ENSG00000205544	TMEM256	0.724014	0.00101553
	ENSG00000127184	COX7C	0.723964	0.00101676
	ENSG00000103994	ZNF106	0.723839	0.0010198
	ENSG00000265354	TIMM23	0.723267	0.00103384
	ENSG00000093144	ECHDC1	0.722713	0.0010476
	ENSG00000188921	HACD4	0.720408	0.00110644
	ENSG00000188725	SMIM15	0.719901	0.00111973
	ENSG00000148153	INIP	0.719895	0.0011199
	ENSG00000143119	CD53	0.719701	0.00112501
	ENSG00000153037	SRP19	0.718712	0.00115144
	ENSG00000114125	RNF7	0.71791	0.00117325
	ENSG00000075303	SLC25A40	0.717342	0.00118891
	ENSG00000137364	TPMT	0.716552	0.00121097
	ENSG00000152240	HAUS1	0.716501	0.0012124
	ENSG00000101052	IFT52	0.715814	0.00123186
	ENSG00000133606	MKRN1	0.715742	0.00123392
	ENSG00000196975	ANXA4	0.715273	0.00124736
	ENSG00000116005	PCYOX1	0.715266	0.00124758
	ENSG00000197713	RPE	0.71495	0.00125671
	ENSG00000243646	IL10RB	0.714245	0.0012773
	ENSG00000101928	MOSPD1	0.713817	0.00128992
	ENSG00000100902	PSMA6	0.713728	0.00129255
	ENSG00000100911	PSME2	0.713649	0.00129491
	ENSG00000143337	TOR1AIP1	0.711751	0.00135235
	ENSG00000135052	GOLM1	0.711735	0.00135282
	ENSG00000109046	WSB1	0.710225	0.00140004
	ENSG00000056050	HPF1	0.710084	0.00140451
	ENSG00000122705	CLTA	0.70968	0.00141738
	ENSG00000135900	MRPL44	0.709191	0.00143313
	ENSG00000154845	PPP4R1	0.70855	0.00145396
	ENSG00000105185	PDCD5	0.708467	0.00145667
	ENSG00000169299	PGM2	0.70805	0.00147036
	ENSG00000143771	CNIH4	0.707523	0.00148784
	ENSG00000162521	RBBP4	0.704875	0.00157827
	ENSG00000129055	ANAPC13	0.703728	0.0016188
	ENSG00000164414	SLC35A1	0.702829	0.00165117
	ENSG00000152422	XRCC4	0.702167	0.00167536
	ENSG00000168899	VAMP5	0.702075	0.00167873
	ENSG00000150540	HNMT	0.701369	0.00170486
	ENSG00000136161	RCBTB2	0.701328	0.00170642
	ENSG00000279088	NA	0.700588	0.00173418
	ENSG00000162819	BROX	0.700375	0.00174225

## Sheet: darkred
Supplementary Table 6: Complete list of hub genes identified for each non-preserved module
Hubgenes_info	Gene_id	Symbol	kMEdarkred	kMEdarkred_pvalue
60	ENSG00000136878	USP20	0.936789	3.09448e-08
	ENSG00000105655	ISYNA1	0.933134	4.66651e-08
	ENSG00000100105	PATZ1	0.926317	9.47304e-08
	ENSG00000198089	SFI1	0.917099	2.23125e-07
	ENSG00000166313	APBB1	0.899065	9.25469e-07
	ENSG00000106608	URGCP	0.896506	1.10809e-06
	ENSG00000167895	TMC8	0.872113	5.0354e-06
	ENSG00000159753	CARMIL2	0.866853	6.70525e-06
	ENSG00000167106	FAM102A	0.864632	7.54016e-06
	ENSG00000174282	ZBTB4	0.860119	9.51147e-06
	ENSG00000285596	NA	0.856905	1.11684e-05
	ENSG00000130684	ZNF337	0.848823	1.64534e-05
	ENSG00000204946	ZNF783	0.843381	2.10968e-05
	ENSG00000227218	NA	0.837011	2.78992e-05
	ENSG00000089154	GCN1	0.8368	2.8152e-05
	ENSG00000111203	ITFG2	0.828751	3.94079e-05
	ENSG00000171608	PIK3CD	0.824297	4.71252e-05
	ENSG00000103199	ZNF500	0.821361	5.2879e-05
	ENSG00000132182	NUP210	0.816294	6.42066e-05
	ENSG00000158941	CCAR2	0.815726	6.55955e-05
	ENSG00000222037	IGLC6	0.813362	7.16489e-05
	ENSG00000131634	TMEM204	0.807539	8.8601e-05
	ENSG00000170322	NFRKB	0.807266	8.94704e-05
	ENSG00000112877	CEP72	0.807034	9.02168e-05
	ENSG00000125122	LRRC29	0.806224	9.28626e-05
	ENSG00000279474	NA	0.806062	9.33982e-05
	ENSG00000178921	PFAS	0.803143	0.000103527
	ENSG00000239521	CASTOR3	0.802112	0.00010732
	ENSG00000157303	SUSD3	0.798907	0.000119859
	ENSG00000187017	ESPN	0.794812	0.000137649
	ENSG00000127586	CHTF18	0.79163	0.00015296
	ENSG00000247287	NA	0.784855	0.000190362
	ENSG00000009694	TENM1	0.78479	0.000190752
	ENSG00000168056	LTBP3	0.783363	0.000199548
	ENSG00000084774	CAD	0.780828	0.000216014
	ENSG00000223705	NSUN5P1	0.771353	0.000287982
	ENSG00000263072	NA	0.771139	0.000289819
	ENSG00000279277	NA	0.768947	0.000309152
	ENSG00000250903	NA	0.765625	0.000340485
	ENSG00000241666	NA	0.764116	0.000355578
	ENSG00000185252	ZNF74	0.760172	0.000397657
	ENSG00000162241	SLC25A45	0.757256	0.000431376
	ENSG00000154358	OBSCN	0.756538	0.000440034
	ENSG00000115568	ZNF142	0.756393	0.000441799
	ENSG00000188878	FBF1	0.751739	0.000501681
	ENSG00000249115	HAUS5	0.751558	0.000504152
	ENSG00000198793	MTOR	0.744914	0.000601618
	ENSG00000139044	B4GALNT3	0.743096	0.000630848
	ENSG00000277301	LOC101929698	0.741758	0.000653113
	ENSG00000213918	DNASE1	0.735674	0.000762734
	ENSG00000268362	NA	0.731373	0.000849073
	ENSG00000173762	CD7	0.726594	0.000954368
	ENSG00000226963	NA	0.722991	0.00104067
	ENSG00000141577	CEP131	0.720904	0.00109354
	ENSG00000083807	SLC27A5	0.719017	0.00114324
	ENSG00000143442	POGZ	0.718331	0.00116176
	ENSG00000196405	EVL	0.716861	0.00120229
	ENSG00000132275	RRP8	0.716736	0.00120579
	ENSG00000070047	PHRF1	0.708271	0.0014631
	ENSG00000273311	DGCR11	0.705587	0.00155354

## Sheet: greenyellow
Supplementary Table 6: Complete list of hub genes identified for each non-preserved module
Hubgenes_info	Gene_id	Symbol	kMEgreenyellow	kMEgreenyellow_pvalue
	ENSG00000124608	AARS2	0.817551	6.12236e-05
	ENSG00000164252	AGGF1	0.779818	0.000222882
	ENSG00000205784	ARRDC5	0.842559	2.18865e-05
	ENSG00000186666	BCDIN3D	0.759828	0.00040152
	ENSG00000145919	BOD1	0.80914	8.36337e-05
	ENSG00000112983	BRD8	0.883136	2.64789e-06
	ENSG00000130921	C12orf65	0.898177	9.85684e-07
	ENSG00000143633	C1orf131	0.782232	0.000206761
	ENSG00000106144	CASP2	0.864656	7.53053e-06
	ENSG00000105879	CBLL1	0.781178	0.000213675
	ENSG00000164366	CCDC127	0.814133	6.96266e-05
	ENSG00000135637	CCDC142	0.785467	0.000186692
	ENSG00000162063	CCNF	0.731117	0.000854457
	ENSG00000177946	CENPBD1	0.722386	0.00105577
	ENSG00000147457	CHMP7	0.778493	0.000232174
	ENSG00000180917	CMTR2	0.752179	0.00049575
	ENSG00000100058	CRYBB2P1	0.845054	1.95636e-05
	ENSG00000101138	CSTF1	0.831522	3.51678e-05
	ENSG00000175215	CTDSP2	0.779502	0.000225073
	ENSG00000174151	CYB561D1	0.877228	3.76529e-06
	ENSG00000106258	CYP3A5	0.800529	0.000113366
	ENSG00000162777	DENND2D	0.869534	5.80348e-06
	ENSG00000137038	DMAC1	0.855991	1.16822e-05
	ENSG00000116138	DNAJC16	0.801496	0.000109638
	ENSG00000127334	DYRK2	0.707027	0.00150446
	ENSG00000141642	ELAC1	0.790601	0.000158205
	ENSG00000168040	FADD	0.782367	0.00020589
	ENSG00000187866	FAM122A	0.771521	0.000286559
	ENSG00000145945	FAM50B	0.799296	0.000118274
	ENSG00000158483	FAM86C1P	0.766558	0.00033143
134	ENSG00000183161	FANCF	0.941123	1.83969e-08
	ENSG00000082516	GEMIN5	0.753939	0.000472589
	ENSG00000106560	GIMAP2	0.850225	1.54081e-05
	ENSG00000196329	GIMAP5	0.836459	2.85667e-05
	ENSG00000179144	GIMAP7	0.863398	8.04081e-06
	ENSG00000171115	GIMAP8	0.775002	0.000258207
	ENSG00000145723	GIN1	0.75595	0.000447232
	ENSG00000143457	GOLPH3L	0.843653	2.08406e-05
	ENSG00000076650	GPATCH1	0.703399	0.00163058
	ENSG00000153767	GTF2E1	0.861927	8.6748e-06
	ENSG00000172273	HINFP	0.720346	0.00110806
	ENSG00000172349	IL16	0.844669	1.99077e-05
	ENSG00000213859	KCTD11	0.782138	0.000207369
	ENSG00000168301	KCTD6	0.76586	0.000338181
	ENSG00000213658	LAT	0.774438	0.000262634
	ENSG00000264247	LINC00909	0.809055	8.3893e-05
	ENSG00000270049	LOC101927837	0.864763	7.48839e-06
	ENSG00000184574	LPAR5	0.835221	3.01151e-05
	ENSG00000107816	LZTS2	0.740917	0.000667428
	ENSG00000171806	METTL18	0.709199	0.00143287
	ENSG00000177427	MIEF2	0.759683	0.000403153
	ENSG00000124217	MOCS3	0.898315	9.76115e-07
	ENSG00000133422	MORC2	0.839647	2.4888e-05
	ENSG00000178988	MRFAP1L1	0.882041	2.83038e-06
	ENSG00000278619	MRM1	0.712724	0.00132264
	ENSG00000101181	MTG2	0.753182	0.000482442
	ENSG00000135297	MTO1	0.85578	1.18033e-05
	ENSG00000136997	MYC	0.723487	0.00102841
	ENSG00000285909	NA	0.843137	2.13282e-05
	ENSG00000284734	NA	0.810786	7.87755e-05
	ENSG00000161048	NAPEPLD	0.708424	0.00145808
	ENSG00000124160	NCOA5	0.793805	0.00014235
	ENSG00000196290	NIF3L1	0.801069	0.000111271
	ENSG00000105088	OLFM2	0.935206	3.70794e-08
	ENSG00000170915	PAQR8	0.860724	9.22398e-06
	ENSG00000162396	PARS2	0.791866	0.000151776
	ENSG00000185220	PGBD2	0.930677	6.07297e-08
	ENSG00000040633	PHF23	0.90082	8.15642e-07
	ENSG00000170734	POLH	0.783523	0.000198549
	ENSG00000235194	PPP1R3E	0.804529	9.86091e-05
	ENSG00000101417	PXMP4	0.864355	7.65e-06
	ENSG00000163348	PYGO2	0.873649	4.62062e-06
	ENSG00000144134	RABL2A	0.756282	0.000443158
	ENSG00000170468	RIOX1	0.817875	6.04727e-05
	ENSG00000178966	RMI1	0.810302	8.01795e-05
	ENSG00000135828	RNASEL	0.763649	0.000360358
	ENSG00000187257	RSBN1L	0.852527	1.38154e-05
	ENSG00000136514	RTP4	0.751029	0.000511391
	ENSG00000075856	SART3	0.871723	5.14571e-06
	ENSG00000000457	SCYL3	0.707825	0.00147783
	ENSG00000149257	SERPINH1	0.799103	0.000119056
	ENSG00000041988	THAP3	0.804156	9.99122e-05
	ENSG00000144120	TMEM177	0.929399	6.93805e-08
	ENSG00000198133	TMEM229B	0.79473	0.000138027
	ENSG00000163472	TMEM79	0.75037	0.000520535
	ENSG00000211784	TRAV10	0.708613	0.00145188
	ENSG00000119401	TRIM32	0.900231	8.5117e-07
	ENSG00000104228	TRIM35	0.760774	0.00039098
	ENSG00000162222	TTC9C	0.843191	2.1277e-05
	ENSG00000129696	TTI2	0.800764	0.000112449
	ENSG00000114491	UMPS	0.77414	0.000264997
	ENSG00000163026	WDCP	0.87425	4.46649e-06
	ENSG00000185798	WDR53	0.726411	0.000958604
	ENSG00000241127	YAE1	0.882072	2.82508e-06
	ENSG00000179627	ZBTB42	0.892189	1.48613e-06
	ENSG00000213588	ZBTB9	0.85779	1.06892e-05
	ENSG00000171649	ZIK1	0.815479	6.62067e-05
	ENSG00000187626	ZKSCAN4	0.784597	0.000191923
	ENSG00000275111	ZNF2	0.79191	0.000151555
	ENSG00000121417	ZNF211	0.767837	0.000319337
	ENSG00000167380	ZNF226	0.813828	7.04198e-05
	ENSG00000159882	ZNF230	0.76979	0.000301587
	ENSG00000263002	ZNF234	0.809379	8.29149e-05
	ENSG00000254004	ZNF260	0.871738	5.14131e-06
	ENSG00000198538	ZNF28	0.777048	0.000242666
	ENSG00000168661	ZNF30	0.758681	0.00041461
	ENSG00000083817	ZNF416	0.829659	3.79737e-05
	ENSG00000197050	ZNF420	0.705549	0.00155485
	ENSG00000185219	ZNF445	0.75742	0.000429417
	ENSG00000124459	ZNF45	0.810873	7.85248e-05
	ENSG00000197016	ZNF470	0.870167	5.60611e-06
	ENSG00000186446	ZNF501	0.846614	1.82208e-05
	ENSG00000167625	ZNF526	0.811692	7.62054e-05
	ENSG00000183647	ZNF530	0.816928	6.26868e-05
	ENSG00000178229	ZNF543	0.797032	0.000127747
	ENSG00000251369	ZNF550	0.720458	0.00110512
	ENSG00000171469	ZNF561	0.793141	0.000145521
	ENSG00000198453	ZNF568	0.798305	0.000122343
	ENSG00000198440	ZNF583	0.807243	8.95443e-05
	ENSG00000176024	ZNF613	0.888995	1.83231e-06
	ENSG00000204611	ZNF616	0.790697	0.00015771
	ENSG00000177842	ZNF620	0.734629	0.000783016
	ENSG00000183309	ZNF623	0.760696	0.000391834
	ENSG00000083814	ZNF671	0.888993	1.8326e-06
	ENSG00000164011	ZNF691	0.924883	1.08994e-07
	ENSG00000185730	ZNF696	0.825881	4.42466e-05
	ENSG00000139651	ZNF740	0.729545	0.000888144
	ENSG00000162086	ZNF75A	0.791733	0.000152442
	ENSG00000169951	ZNF764	0.804197	9.97669e-05
	ENSG00000196214	ZNF766	0.789055	0.000166371
	ENSG00000128000	ZNF780B	0.769109	0.000307686
	ENSG00000197362	ZNF786	0.847607	1.74071e-05
	ENSG00000180257	ZNF816	0.809277	8.32204e-05
	ENSG00000127903	ZNF835	0.79483	0.000137568

## Sheet: grey60
Supplementary Table 6: Complete list of hub genes identified for each non-preserved module
Hubgenes_info	Gene_id	Symbol	kMEgrey60	kMEgrey60_pvalue
85	ENSG00000177455	CD19	0.94527	1.07679e-08
	ENSG00000167483	NIBAN3	0.941134	1.83719e-08
	ENSG00000132185	FCRLA	0.93473	3.91172e-08
	ENSG00000095585	BLNK	0.931867	5.35178e-08
	ENSG00000187912	CLEC17A	0.930334	6.2955e-08
	ENSG00000128218	VPREB3	0.922925	1.3144e-07
	ENSG00000091972	CD200	0.911277	3.64862e-07
	ENSG00000241106	HLA-DOB	0.907266	5.02289e-07
	ENSG00000105369	CD79A	0.900954	8.07727e-07
	ENSG00000188822	CNR2	0.899125	9.21485e-07
	ENSG00000211978	IGHV5-78	0.896082	1.14116e-06
	ENSG00000162894	FCMR	0.894679	1.25658e-06
	ENSG00000110777	POU2AF1	0.893281	1.38145e-06
	ENSG00000012124	CD22	0.891279	1.57854e-06
	ENSG00000100721	TCL1A	0.89074	1.63552e-06
	ENSG00000147535	PLPP5	0.887755	1.98418e-06
	ENSG00000211899	IGHM	0.885581	2.27621e-06
	ENSG00000104921	FCER2	0.879815	3.2345e-06
	ENSG00000002587	HS3ST1	0.86966	5.76381e-06
	ENSG00000269404	SPIB	0.8648	7.4739e-06
	ENSG00000065923	SLC9A7	0.861823	8.72099e-06
	ENSG00000168081	PNOC	0.857172	1.10221e-05
	ENSG00000035720	STAP1	0.852659	1.37282e-05
	ENSG00000133740	E2F5	0.852397	1.39013e-05
	ENSG00000155287	SLC25A28	0.851749	1.43371e-05
	ENSG00000147642	SYBU	0.844521	2.0042e-05
	ENSG00000243156	MICAL3	0.843583	2.09066e-05
	ENSG00000272398	CD24	0.842674	2.17737e-05
	ENSG00000173581	CCDC106	0.8353	3.00138e-05
	ENSG00000007312	CD79B	0.834195	3.14502e-05
	ENSG00000240710	NA	0.833009	3.30569e-05
	ENSG00000196628	TCF4	0.829516	3.81952e-05
	ENSG00000151746	BICD1	0.826818	4.26133e-05
	ENSG00000196092	PAX5	0.826464	4.32245e-05
	ENSG00000245498	LOC100507283	0.825676	4.46096e-05
	ENSG00000124243	BCAS4	0.824558	4.66404e-05
	ENSG00000159958	TNFRSF13C	0.823724	4.82032e-05
	ENSG00000245869	NA	0.823079	4.94439e-05
	ENSG00000005471	ABCB4	0.821564	5.24643e-05
	ENSG00000257221	NA	0.820294	5.51141e-05
	ENSG00000211898	IGHD	0.818432	5.92002e-05
	ENSG00000124772	CPNE5	0.817757	6.07437e-05
	ENSG00000112232	KHDRBS2	0.817397	6.15827e-05
	ENSG00000119333	DYNC2I2	0.807752	8.79251e-05
	ENSG00000229106	NA	0.799707	0.000116618
	ENSG00000164649	CDCA7L	0.797594	0.000125339
	ENSG00000254709	IGLL5	0.796103	0.000131814
	ENSG00000006432	MAP3K9	0.795718	0.000133534
	ENSG00000136573	BLK	0.793984	0.000141504
	ENSG00000177425	PAWR	0.792396	0.00014915
	ENSG00000173926	MARCHF3	0.790677	0.000157813
	ENSG00000162373	BEND5	0.788805	0.000167725
	ENSG00000116191	RALGPS2	0.786169	0.00018256
	ENSG00000165209	STRBP	0.780615	0.000217451
	ENSG00000111676	ATN1	0.777127	0.000242086
	ENSG00000168734	PKIG	0.77634	0.000247952
	ENSG00000188848	BEND4	0.774363	0.000263225
	ENSG00000071564	TCF3	0.7736	0.000269331
	ENSG00000186265	BTLA	0.773408	0.00027088
	ENSG00000144645	OSBPL10	0.772536	0.000278035
	ENSG00000131196	NFATC1	0.768681	0.000311569
	ENSG00000103365	GGA2	0.766929	0.000327887
	ENSG00000257275	NA	0.763751	0.000359303
	ENSG00000197385	ZNF860	0.762148	0.000376081
	ENSG00000226777	FAM30A	0.761219	0.000386104
	ENSG00000002745	WNT16	0.759281	0.000407715
	ENSG00000151748	SAV1	0.757263	0.000431287
	ENSG00000211593	IGKJ5	0.751766	0.000501316
	ENSG00000270164	LINC01480	0.750729	0.00051554
	ENSG00000253535	NA	0.744564	0.000607144
	ENSG00000133789	SWAP70	0.744336	0.000610781
	ENSG00000144218	AFF3	0.741603	0.00065573
	ENSG00000259768	NA	0.736402	0.000748873
	ENSG00000133985	TTC9	0.732133	0.000833263
	ENSG00000128438	NA	0.731498	0.000846471
	ENSG00000165905	LARGE2	0.728233	0.000917097
	ENSG00000287778	NA	0.727888	0.000924833
	ENSG00000075275	CELSR1	0.725866	0.000971295
	ENSG00000055118	KCNH2	0.723704	0.00102309
	ENSG00000111602	TIMELESS	0.721698	0.00107317
	ENSG00000237638	LINC02245	0.717184	0.00119328
	ENSG00000255240	LOC283194	0.71465	0.00126543
	ENSG00000240505	TNFRSF13B	0.712969	0.00131524
	ENSG00000280411	IGHV1-69D	0.709511	0.00142282
	ENSG00000237111	IGHJ3P	0.700137	0.00175132

## Sheet: lightgreen
Supplementary Table 6: Complete list of hub genes identified for each non-preserved module
Hubgenes_info	Gene_id	Symbol	kMElightgreen	kMElightgreen
62	ENSG00000159346	ADIPOR1	0.935334	3.65479e-08
	ENSG00000118515	SGK1	0.933654	4.40786e-08
	ENSG00000095380	NANS	0.925345	1.04214e-07
	ENSG00000106546	AHR	0.912832	3.21019e-07
	ENSG00000205269	TMEM170B	0.90533	5.83135e-07
	ENSG00000164687	FABP5	0.904113	6.39425e-07
	ENSG00000174437	ATP2A2	0.901813	7.58575e-07
	ENSG00000146676	PURB	0.898745	9.46773e-07
	ENSG00000165030	NFIL3	0.898226	9.82265e-07
	ENSG00000173334	TRIB1	0.892396	1.46584e-06
	ENSG00000171867	PRNP	0.889272	1.79981e-06
	ENSG00000026025	VIM	0.889254	1.80188e-06
	ENSG00000122644	ARL4A	0.88485	2.38239e-06
	ENSG00000113742	CPEB4	0.879678	3.26097e-06
	ENSG00000122862	SRGN	0.877969	3.60608e-06
	ENSG00000274213	NA	0.861679	8.78553e-06
	ENSG00000151726	ACSL1	0.852615	1.37572e-05
	ENSG00000168675	LDLRAD4	0.85115	1.47503e-05
	ENSG00000005022	SLC25A5	0.848235	1.69089e-05
	ENSG00000131389	SLC6A6	0.84253	2.19142e-05
	ENSG00000140968	IRF8	0.841489	2.29513e-05
	ENSG00000116741	RGS2	0.837347	2.74984e-05
	ENSG00000134375	TIMM17A	0.836483	2.85372e-05
	ENSG00000204287	HLA-DRA	0.834304	3.13065e-05
	ENSG00000093134	VNN3	0.83262	3.35989e-05
	ENSG00000135821	GLUL	0.831852	3.46893e-05
	ENSG00000266389	NA	0.82232	5.09377e-05
	ENSG00000166401	SERPINB8	0.81987	5.60223e-05
	ENSG00000173744	AGFG1	0.81961	5.65853e-05
	ENSG00000101367	MAPRE1	0.817433	6.14983e-05
	ENSG00000132434	LANCL2	0.816722	6.31786e-05
	ENSG00000126262	FFAR2	0.811792	7.59251e-05
	ENSG00000065978	YBX1	0.807251	8.95204e-05
	ENSG00000006459	KDM7A	0.797809	0.000124429
	ENSG00000115919	KYNU	0.79563	0.00013393
	ENSG00000077585	GPR137B	0.792555	0.000148367
	ENSG00000186407	CD300E	0.790063	0.000161011
	ENSG00000075415	SLC25A3	0.788975	0.000166806
	ENSG00000139832	RAB20	0.7827	0.000203749
	ENSG00000197208	SLC22A4	0.78199	0.000208331
	ENSG00000065911	MTHFD2	0.78082	0.00021607
	ENSG00000196083	IL1RAP	0.779527	0.000224896
	ENSG00000153391	INO80C	0.778848	0.00022965
	ENSG00000187231	SESTD1	0.776272	0.000248466
	ENSG00000170832	USP32	0.768439	0.000313774
	ENSG00000090376	IRAK3	0.76745	0.000322961
	ENSG00000162511	LAPTM5	0.767212	0.000325202
	ENSG00000115956	PLEK	0.764339	0.000353307
	ENSG00000170889	RPS9	0.762644	0.000370822
	ENSG00000044574	HSPA5	0.761742	0.00038043
	ENSG00000065154	OAT	0.756545	0.000439939
	ENSG00000248712	CCDC153	0.748755	0.000543528
	ENSG00000168374	ARF4	0.742922	0.000633704
	ENSG00000109756	RAPGEF2	0.742193	0.000645807
	ENSG00000198176	TFDP1	0.741894	0.000650817
	ENSG00000102317	RBM3	0.738526	0.000709597
	ENSG00000169439	SDC2	0.733955	0.00079633
	ENSG00000101773	RBBP8	0.731453	0.000847402
	ENSG00000163625	WDFY3	0.721044	0.00108993
	ENSG00000176597	B3GNT5	0.714145	0.00128024
	ENSG00000125968	ID1	0.71282	0.00131975
	ENSG00000123416	TUBA1B	0.700213	0.00174843

## Sheet: lightyellow
Supplementary Table 6: Complete list of hub genes identified for each non-preserved module
Hubgene_info	Gene_id	Symbol	kMElightyellow	kMElightyellow_pvalue
59	ENSG00000101474	APMAP	0.950487	5.15831e-09
	ENSG00000180739	S1PR5	0.942821	1.48454e-08
	ENSG00000126822	PLEKHG3	0.926444	9.35423e-08
	ENSG00000150687	PRSS23	0.923756	1.21473e-07
	ENSG00000073861	TBX21	0.921562	1.49305e-07
	ENSG00000180644	PRF1	0.914564	2.77589e-07
	ENSG00000105374	NKG7	0.909664	4.15661e-07
	ENSG00000159618	ADGRG5	0.894895	1.23816e-06
	ENSG00000205336	ADGRG1	0.889464	1.77753e-06
	ENSG00000128294	TPST2	0.852072	1.41186e-05
	ENSG00000073350	LLGL2	0.850861	1.49535e-05
	ENSG00000162383	SLC1A7	0.850446	1.52493e-05
	ENSG00000162746	FCRLB	0.85039	1.52895e-05
	ENSG00000198933	TBKBP1	0.84853	1.66785e-05
	ENSG00000077984	CST7	0.838753	2.58769e-05
	ENSG00000007264	MATK	0.836071	2.90449e-05
	ENSG00000167123	CERCAM	0.833315	3.2636e-05
	ENSG00000196968	FUT11	0.832811	3.33311e-05
	ENSG00000116667	C1orf21	0.830631	3.64873e-05
	ENSG00000137441	FGFBP2	0.824395	4.69427e-05
	ENSG00000021762	OSBPL5	0.824093	4.75075e-05
	ENSG00000100027	YPEL1	0.822457	5.0665e-05
	ENSG00000148019	CEP78	0.819603	5.6602e-05
	ENSG00000142634	EFHD2	0.817948	6.03039e-05
	ENSG00000145730	PAM	0.817345	6.17039e-05
	ENSG00000286640	NA	0.816163	6.45258e-05
	ENSG00000141736	ERBB2	0.815847	6.5297e-05
	ENSG00000225079	FTH1P22	0.815712	6.56314e-05
	ENSG00000133067	LGR6	0.815676	6.572e-05
	ENSG00000135362	PRR5L	0.815397	6.64124e-05
	ENSG00000134539	KLRD1	0.814127	6.96411e-05
	ENSG00000168229	PTGDR	0.814116	6.96685e-05
	ENSG00000149294	NCAM1	0.797086	0.000127516
	ENSG00000100453	GZMB	0.79547	0.000134648
	ENSG00000109956	B3GAT1	0.793272	0.000144889
	ENSG00000171476	HOPX	0.775825	0.000251859
	ENSG00000172460	PRSS30P	0.775237	0.000256382
	ENSG00000175066	GK5	0.77455	0.00026175
	ENSG00000226067	NA	0.766157	0.000335294
	ENSG00000136213	CHST12	0.763324	0.000363714
	ENSG00000139178	C1RL	0.76251	0.000372242
	ENSG00000174348	PODN	0.759609	0.000403987
	ENSG00000145649	GZMA	0.757094	0.000433315
	ENSG00000145284	SCD5	0.750944	0.000512557
	ENSG00000175029	CTBP2	0.747863	0.000556585
	ENSG00000239713	APOBEC3G	0.742916	0.000633811
	ENSG00000067840	PDZD4	0.740207	0.000679728
	ENSG00000086288	NME8	0.738374	0.000712346
	ENSG00000172543	CTSW	0.733755	0.000800317
	ENSG00000108387	SEPTIN4	0.723574	0.00102629
	ENSG00000169252	ADRB2	0.718699	0.0011518
	ENSG00000163564	PYHIN1	0.717542	0.00118339
	ENSG00000065989	PDE4A	0.715973	0.00122735
	ENSG00000068028	RASSF1	0.715025	0.00125455
	ENSG00000125498	KIR2DL1	0.714297	0.00127575
	ENSG00000148175	STOM	0.710423	0.00139378
	ENSG00000233369	GTF2IP4	0.710372	0.00139536
	ENSG00000007047	MARK4	0.705637	0.0015518
	ENSG00000197971	MBP	0.701202	0.00171109

## Sheet: midnighblue
Supplementary Table 6: Complete list of hub genes identified for each non-preserved module
Hubgenes_info	Gene_id	Symbol	kMEmidnightblue	kMEmidnightblue_pvalue
64	ENSG00000100450	GZMH	0.933904	4.28788e-08
	ENSG00000166105	GLB1L3	0.911172	3.68001e-07
	ENSG00000256667	NA	0.904156	6.37341e-07
	ENSG00000147889	CDKN2A	0.895352	1.20002e-06
	ENSG00000271503	CCL5	0.88884	1.85071e-06
	ENSG00000090097	PCBP4	0.887611	2.00246e-06
	ENSG00000089692	LAG3	0.879036	3.38728e-06
	ENSG00000188001	TPRG1	0.864554	7.57068e-06
	ENSG00000181036	FCRL6	0.860473	9.34232e-06
	ENSG00000229474	PATL2	0.851476	1.45241e-05
	ENSG00000251034	NA	0.850596	1.51418e-05
	ENSG00000235162	C12orf75	0.848874	1.64139e-05
	ENSG00000125726	CD70	0.83449	3.10608e-05
	ENSG00000162676	GFI1	0.830941	3.60226e-05
	ENSG00000136950	ARPC5L	0.825991	4.40517e-05
	ENSG00000162739	SLAMF6	0.825122	4.5606e-05
	ENSG00000159335	PTMS	0.812097	7.5077e-05
	ENSG00000081377	CDC14B	0.810731	7.89343e-05
	ENSG00000150093	ITGB1	0.810564	7.94177e-05
	ENSG00000054654	SYNE2	0.81006	8.08895e-05
	ENSG00000196586	MYO6	0.805959	9.37423e-05
	ENSG00000181104	F2R	0.805221	9.62257e-05
	ENSG00000227191	TRGC2	0.799179	0.000118747
	ENSG00000172348	RCAN2	0.798467	0.00012167
	ENSG00000135631	RAB11FIP5	0.797737	0.000124729
	ENSG00000198915	RASGEF1A	0.797008	0.000127852
	ENSG00000109674	NEIL3	0.796517	0.000129991
	ENSG00000122557	HERPUD2	0.792075	0.000150735
	ENSG00000135114	OASL	0.787422	0.000175376
	ENSG00000139116	KIF21A	0.785245	0.000188019
	ENSG00000225648	SBDSP1	0.783247	0.000200276
	ENSG00000133935	ERG28	0.782342	0.000206053
	ENSG00000198826	ARHGAP11A	0.782042	0.000207995
	ENSG00000185090	MANEAL	0.780985	0.000214964
	ENSG00000071909	MYO3B	0.780748	0.000216552
	ENSG00000060140	STYK1	0.780692	0.000216929
	ENSG00000153563	CD8A	0.777437	0.000239806
	ENSG00000189136	UBE2Q2P1	0.775619	0.000253435
	ENSG00000136770	DNAJC1	0.773839	0.000267407
	ENSG00000108370	RGS9	0.773498	0.00027015
	ENSG00000127990	SGCE	0.768245	0.000315564
	ENSG00000178860	MSC	0.765507	0.000341643
	ENSG00000198513	ATL1	0.763887	0.000357915
	ENSG00000256128	NA	0.760183	0.000397531
	ENSG00000052126	PLEKHA5	0.753962	0.000472284
	ENSG00000196169	KIF19	0.750307	0.000521424
	ENSG00000276533	NA	0.747155	0.000567121
	ENSG00000172031	EPHX4	0.744778	0.000603762
	ENSG00000082458	DLG3	0.74208	0.000647697
	ENSG00000167094	TTC16	0.740833	0.000668886
	ENSG00000149328	GLB1L2	0.740206	0.000679752
	ENSG00000131943	C19orf12	0.733673	0.000801956
	ENSG00000205045	SLFN12L	0.726871	0.000947969
	ENSG00000156475	PPP2R2B	0.719627	0.00112698
	ENSG00000067057	PFKP	0.719182	0.00113882
	ENSG00000153982	GDPD1	0.71682	0.00120343
	ENSG00000177311	ZBTB38	0.716569	0.00121047
	ENSG00000139187	KLRG1	0.716283	0.00121853
	ENSG00000233306	TRGV2	0.715005	0.00125513
	ENSG00000131370	SH3BP5	0.714296	0.00127578
	ENSG00000276747	PADI6	0.712262	0.00133669
	ENSG00000269378	NA	0.70482	0.00158018
	ENSG00000142945	KIF2C	0.702379	0.00166758
	ENSG00000176083	ZNF683	0.701896	0.00168533

## Sheet: pink
Supplementary Table 6: Complete list of hub genes identified for each non-preserved module
Hubgenes_info	Gene_id	Symbol	kMEpink	kMEpink_pvalue
251	ENSG00000165813	CCDC186	0.965721	3.42034e-10
	ENSG00000214367	HAUS3	0.961364	8.28516e-10
	ENSG00000165169	DYNLT3	0.948566	6.82349e-09
	ENSG00000151239	TWF1	0.940961	1.8771e-08
	ENSG00000152795	HNRNPDL	0.937125	2.97603e-08
	ENSG00000181163	NPM1	0.937121	2.97748e-08
	ENSG00000224032	NA	0.933308	4.57852e-08
	ENSG00000173726	TOMM20	0.932287	5.11571e-08
	ENSG00000172175	MALT1	0.929843	6.62673e-08
	ENSG00000156802	ATAD2	0.927002	8.84997e-08
	ENSG00000156976	EIF4A2	0.923314	1.26684e-07
	ENSG00000198160	MIER1	0.923064	1.29719e-07
	ENSG00000164924	YWHAZ	0.921036	1.56738e-07
	ENSG00000108654	DDX5	0.920457	1.65276e-07
	ENSG00000147669	POLR2K	0.91807	2.04843e-07
	ENSG00000123106	CCDC91	0.917994	2.06235e-07
	ENSG00000006634	DBF4	0.917903	2.07896e-07
	ENSG00000137876	RSL24D1	0.917366	2.17973e-07
	ENSG00000117906	RCN2	0.914702	2.74349e-07
	ENSG00000114391	RPL24	0.913987	2.91452e-07
	ENSG00000071243	ING3	0.913423	3.0559e-07
	ENSG00000198668	CALM1	0.912473	3.30729e-07
	ENSG00000137770	CTDSPL2	0.912059	3.42216e-07
	ENSG00000133773	CCDC59	0.90953	4.20127e-07
	ENSG00000138182	KIF20B	0.908837	4.43965e-07
	ENSG00000115053	NCL	0.902206	7.36973e-07
	ENSG00000174173	TRMT10C	0.901418	7.80862e-07
	ENSG00000188846	RPL14	0.900731	8.20897e-07
	ENSG00000055044	NOP58	0.900243	8.50405e-07
	ENSG00000100650	SRSF5	0.899323	9.08547e-07
	ENSG00000272888	NA	0.898348	9.73804e-07
	ENSG00000122026	RPL21	0.898223	9.8249e-07
	ENSG00000103342	GSPT1	0.897498	1.03392e-06
	ENSG00000113387	SUB1	0.89586	1.15879e-06
	ENSG00000062194	GPBP1	0.892293	1.4759e-06
	ENSG00000131876	SNRPA1	0.890523	1.65897e-06
	ENSG00000182899	RPL35A	0.889348	1.79096e-06
	ENSG00000082153	BZW1	0.889286	1.7982e-06
	ENSG00000147604	RPL7	0.886664	2.12643e-06
	ENSG00000137154	RPS6	0.886501	2.1484e-06
	ENSG00000066654	THUMPD1	0.886268	2.1802e-06
	ENSG00000133112	TPT1	0.886077	2.20649e-06
	ENSG00000197969	VPS13A	0.885776	2.24858e-06
	ENSG00000106591	MRPL32	0.883191	2.639e-06
	ENSG00000156256	USP16	0.882728	2.71455e-06
	ENSG00000127995	CASD1	0.882526	2.74823e-06
	ENSG00000142396	ERVK3-1	0.881294	2.96091e-06
	ENSG00000134419	RPS15A	0.880493	3.10656e-06
	ENSG00000186625	KATNA1	0.879828	3.23213e-06
	ENSG00000115904	SOS1	0.878576	3.48014e-06
	ENSG00000205581	HMGN1	0.87846	3.50401e-06
	ENSG00000111615	KRR1	0.877743	3.65415e-06
	ENSG00000152484	USP12	0.877424	3.72264e-06
	ENSG00000101745	ANKRD12	0.875129	4.24882e-06
	ENSG00000120798	NR2C1	0.873811	4.57859e-06
	ENSG00000143158	MPC2	0.873559	4.64413e-06
	ENSG00000105821	DNAJC2	0.873536	4.6502e-06
	ENSG00000114784	EIF1B	0.872944	4.80727e-06
	ENSG00000116514	RNF19B	0.872638	4.89027e-06
	ENSG00000083720	OXCT1	0.869563	5.7941e-06
	ENSG00000251562	MALAT1	0.866596	6.79768e-06
	ENSG00000112406	HECA	0.865807	7.088e-06
	ENSG00000143947	RPS27A	0.865594	7.16806e-06
	ENSG00000115875	SRSF7	0.864961	7.41119e-06
	ENSG00000118482	PHF3	0.864173	7.72316e-06
	ENSG00000067334	DNTTIP2	0.863972	7.80459e-06
	ENSG00000115541	HSPE1	0.860411	9.37156e-06
	ENSG00000164463	CREBRF	0.860026	9.55603e-06
	ENSG00000159593	NAE1	0.859065	1.00301e-05
	ENSG00000135486	HNRNPA1	0.858232	1.04569e-05
	ENSG00000112851	ERBIN	0.857397	1.09001e-05
	ENSG00000151332	MBIP	0.855583	1.19177e-05
	ENSG00000180694	TMEM64	0.854519	1.25518e-05
	ENSG00000163584	RPL22L1	0.853527	1.31677e-05
	ENSG00000088205	DDX18	0.851987	1.41756e-05
	ENSG00000242125	SNHG3	0.848868	1.64184e-05
	ENSG00000109689	STIM2	0.848538	1.66727e-05
	ENSG00000198242	RPL23A	0.848303	1.68554e-05
	ENSG00000123728	RAP2C	0.847765	1.72806e-05
	ENSG00000106245	BUD31	0.846496	1.83199e-05
	ENSG00000110852	CLEC2B	0.844073	2.04504e-05
	ENSG00000136273	HUS1	0.843332	2.11431e-05
	ENSG00000154582	ELOC	0.843302	2.11717e-05
	ENSG00000198918	RPL39	0.843065	2.13973e-05
	ENSG00000090520	DNAJB11	0.842111	2.23266e-05
	ENSG00000134758	RNF138	0.84206	2.23774e-05
	ENSG00000175455	CCDC14	0.842042	2.23956e-05
	ENSG00000134152	KATNBL1	0.841254	2.31913e-05
	ENSG00000170540	ARL6IP1	0.83903	2.55665e-05
	ENSG00000106399	RPA3	0.838215	2.6487e-05
	ENSG00000139737	SLAIN1	0.837533	2.7279e-05
	ENSG00000085788	DDHD2	0.835286	3.0031e-05
	ENSG00000150593	PDCD4	0.83522	3.01152e-05
	ENSG00000129003	VPS13C	0.835105	3.02635e-05
	ENSG00000162385	MAGOH	0.83441	3.1166e-05
	ENSG00000172673	THEMIS	0.833915	3.18228e-05
	ENSG00000101247	NDUFAF5	0.833814	3.19586e-05
	ENSG00000053900	ANAPC4	0.831934	3.45715e-05
	ENSG00000131979	GCH1	0.830902	3.60812e-05
	ENSG00000163682	RPL9	0.829841	3.76917e-05
	ENSG00000203875	SNHG5	0.829455	3.82917e-05
	ENSG00000245910	SNHG6	0.827129	4.20829e-05
	ENSG00000151292	CSNK1G3	0.826976	4.23432e-05
	ENSG00000142867	BCL10	0.826639	4.29225e-05
	ENSG00000074266	EED	0.825827	4.43421e-05
	ENSG00000118181	RPS25	0.825037	4.57606e-05
	ENSG00000122406	RPL5	0.823427	4.8772e-05
	ENSG00000134308	YWHAQ	0.821641	5.23061e-05
	ENSG00000166225	FRS2	0.820342	5.50097e-05
	ENSG00000151233	GXYLT1	0.819626	5.65502e-05
	ENSG00000122417	ODF2L	0.817658	6.09746e-05
	ENSG00000235453	SMIM27	0.817195	6.20562e-05
	ENSG00000114942	EEF1B2	0.817021	6.24659e-05
	ENSG00000198707	CEP290	0.815663	6.57511e-05
	ENSG00000028203	VEZT	0.814888	6.76907e-05
	ENSG00000173812	EIF1	0.814865	6.7749e-05
	ENSG00000184203	PPP1R2	0.813087	7.23843e-05
	ENSG00000164032	H2AZ1	0.81183	7.58201e-05
	ENSG00000087460	GNAS	0.811188	7.76256e-05
	ENSG00000113810	SMC4	0.81062	7.92534e-05
	ENSG00000178074	C2orf69	0.809743	8.18268e-05
	ENSG00000175105	ZNF654	0.809559	8.23739e-05
	ENSG00000071082	RPL31	0.809512	8.25145e-05
	ENSG00000113575	PPP2CA	0.807808	8.77492e-05
	ENSG00000115816	CEBPZ	0.807682	8.8147e-05
	ENSG00000106462	EZH2	0.806485	9.20017e-05
	ENSG00000197756	RPL37A	0.805872	9.40316e-05
	ENSG00000134333	LDHA	0.805397	9.56276e-05
	ENSG00000092470	WDR76	0.804928	9.72282e-05
	ENSG00000107897	ACBD5	0.804292	9.94352e-05
	ENSG00000196850	PPTC7	0.80404	0.000100322
	ENSG00000138138	ATAD1	0.803992	0.00010049
	ENSG00000172340	SUCLG2	0.802805	0.000104757
	ENSG00000100749	VRK1	0.801415	0.000109948
	ENSG00000164611	PTTG1	0.801072	0.000111261
	ENSG00000081237	PTPRC	0.799291	0.000118294
	ENSG00000145592	RPL37	0.798929	0.000119768
	ENSG00000269929	NA	0.798121	0.000123114
	ENSG00000107938	EDRF1	0.797519	0.000125657
	ENSG00000163738	MTHFD2L	0.795464	0.000134677
	ENSG00000205707	ETFRF1	0.79495	0.000137014
	ENSG00000080824	HSP90AA1	0.79262	0.000148051
	ENSG00000136104	RNASEH2B	0.792579	0.00014825
	ENSG00000162923	WDR26	0.791598	0.000153119
	ENSG00000163257	DCAF16	0.789108	0.000166089
	ENSG00000178202	POGLUT3	0.788167	0.00017122
	ENSG00000156795	NTAQ1	0.787485	0.000175026
	ENSG00000166275	BORCS7	0.787245	0.000176377
	ENSG00000138326	RPS24	0.785981	0.000183661
	ENSG00000154511	DIPK1A	0.783488	0.000198764
	ENSG00000065809	FAM107B	0.783011	0.00020177
	ENSG00000111537	IFNG	0.782109	0.000207555
	ENSG00000152332	UHMK1	0.781302	0.000212853
	ENSG00000196262	PPIA	0.780337	0.000219329
	ENSG00000169567	HINT1	0.780111	0.00022087
	ENSG00000135046	ANXA1	0.77969	0.000223766
	ENSG00000234883	MIR155HG	0.77938	0.000225921
	ENSG00000110693	SOX6	0.778394	0.000232881
	ENSG00000187325	TAF9B	0.777764	0.000237422
	ENSG00000156482	RPL30	0.777552	0.000238961
	ENSG00000215251	FASTKD5	0.774572	0.00026158
	ENSG00000096092	TMEM14A	0.772923	0.000274842
	ENSG00000213741	RPS29	0.771731	0.000284777
	ENSG00000077458	FAM76B	0.769315	0.000305833
	ENSG00000131469	RPL27	0.768376	0.000314356
	ENSG00000145425	RPS3A	0.768163	0.000316316
	ENSG00000054267	ARID4B	0.766928	0.000327896
	ENSG00000085063	CD59	0.765293	0.000343763
	ENSG00000109475	RPL34	0.764727	0.000349398
	ENSG00000066583	ISOC1	0.76394	0.000357366
	ENSG00000229117	RPL41	0.763187	0.000365132
	ENSG00000171863	RPS7	0.761994	0.000377729
	ENSG00000120910	PPP3CC	0.761985	0.000377823
	ENSG00000109534	GAR1	0.76095	0.000389047
	ENSG00000148154	UGCG	0.760634	0.000392528
	ENSG00000198833	UBE2J1	0.759114	0.000409624
	ENSG00000170340	B3GNT2	0.75879	0.000413354
	ENSG00000110318	CEP126	0.751636	0.000503087
	ENSG00000164346	NSA2	0.750203	0.000522882
	ENSG00000117155	SSX2IP	0.750074	0.000524687
	ENSG00000100852	ARHGAP5	0.749979	0.000526029
	ENSG00000120675	DNAJC15	0.749748	0.000529287
	ENSG00000145349	CAMK2D	0.749145	0.000537893
	ENSG00000171488	LRRC8C	0.747936	0.000555496
	ENSG00000214182	PTMAP5	0.747831	0.000557053
	ENSG00000259834	NA	0.746904	0.000570907
	ENSG00000137714	FDX1	0.746098	0.000583176
	ENSG00000164603	BMT2	0.745812	0.000587589
	ENSG00000095564	BTAF1	0.745514	0.000592204
	ENSG00000196449	YRDC	0.745332	0.000595044
	ENSG00000172575	RASGRP1	0.745054	0.000599411
	ENSG00000105968	H2AZ2	0.744316	0.000611103
	ENSG00000167325	RRM1	0.743718	0.000620722
	ENSG00000132475	H3-3B	0.743063	0.000631387
	ENSG00000115750	TAF1B	0.742267	0.000644559
	ENSG00000033178	UBA6	0.741329	0.00066038
	ENSG00000166575	TMEM135	0.741175	0.000663004
	ENSG00000253738	OTUD6B-AS1	0.740425	0.000675931
	ENSG00000093167	LRRFIP2	0.740134	0.000681
	ENSG00000008988	RPS20	0.739644	0.00068961
	ENSG00000156313	RPGR	0.738846	0.000703817
	ENSG00000164109	MAD2L1	0.738724	0.000706019
	ENSG00000005436	GCFC2	0.738615	0.000707976
	ENSG00000170089	LOC728554	0.737821	0.000722422
	ENSG00000035928	RFC1	0.737695	0.000724753
	ENSG00000166441	RPL27A	0.736046	0.000755612
	ENSG00000161970	RPL26	0.736011	0.000756294
	ENSG00000119397	CNTRL	0.735667	0.000762869
	ENSG00000138709	LARP1B	0.734996	0.000775846
	ENSG00000204899	MZT1	0.734726	0.000781112
	ENSG00000015171	ZMYND11	0.732195	0.000831987
	ENSG00000230076	RPL10P6	0.731464	0.000847177
	ENSG00000125107	CNOT1	0.731409	0.000848323
	ENSG00000063046	EIF4B	0.731242	0.000851842
	ENSG00000179476	C14orf28	0.730722	0.000862825
	ENSG00000104177	MYEF2	0.730658	0.000864184
	ENSG00000127311	HELB	0.729628	0.000886353
	ENSG00000104219	ZDHHC2	0.7283	0.000915609
	ENSG00000047365	ARAP2	0.72784	0.000925915
	ENSG00000136003	ISCU	0.727765	0.00092761
	ENSG00000180628	PCGF5	0.727669	0.000929796
	ENSG00000125691	RPL23	0.725365	0.000983106
	ENSG00000144381	HSPD1	0.724691	0.000999167
	ENSG00000171858	RPS21	0.724526	0.00100314
	ENSG00000168944	CEP120	0.724392	0.00100638
	ENSG00000104290	FZD3	0.723917	0.00101791
	ENSG00000136942	RPL35	0.721877	0.00106863
	ENSG00000054219	LY75	0.721397	0.00108086
	ENSG00000066697	MSANTD3	0.721132	0.00108765
	ENSG00000185420	SMYD3	0.716626	0.00120887
	ENSG00000106153	CHCHD2	0.716457	0.00121364
	ENSG00000122912	SLC25A16	0.716032	0.00122565
	ENSG00000171109	MFN1	0.71445	0.00127128
	ENSG00000156508	EEF1A1	0.712891	0.0013176
	ENSG00000150636	CCDC102B	0.710836	0.00138076
	ENSG00000221957	KIR2DS4	0.71056	0.00138945
	ENSG00000141664	ZCCHC2	0.710121	0.00140332
	ENSG00000187555	USP7	0.709998	0.00140724
	ENSG00000225616	RPL27P4	0.709745	0.00141531
	ENSG00000153975	ZUP1	0.708197	0.00146553
	ENSG00000184515	BEX5	0.707536	0.0014874
	ENSG00000165259	HDX	0.706842	0.00151067
	ENSG00000138688	KIAA1109	0.706492	0.00152253
	ENSG00000115392	FANCL	0.70618	0.00153315
	ENSG00000112306	RPS12	0.705952	0.00154097
	ENSG00000078043	PIAS2	0.705535	0.0015553
	ENSG00000198380	GFPT1	0.70486	0.00157878
	ENSG00000114023	FAM162A	0.704535	0.00159019
	ENSG00000115524	SF3B1	0.703945	0.00161107
	ENSG00000177954	RPS27	0.701732	0.0016914
	ENSG00000121864	ZNF639	0.700406	0.00174107

[truncated: 5 more sheets: purple, red, royalblue, turquoise, yellow]
