# Supplementary material for: Differential Co-Expression Network Analysis Reveals Key Hub-High Traffic Genes as Potential Therapeutic Targets for COVID-19 Pandemic
Source: Front Immunol. 2021 Dec 15;12:789317. doi: 10.3389/fimmu.2021.789317 (PMC8714803; doi:10.3389/fimmu.2021.789317)
Supplement: Supplementary file 8 [file Table_7.xlsx]

## Sheet: black
Supplementary Table 7: List of detected TFs per non-preserved module
TFs_info	Gene_id	Symbol
53	ENSG00000143614	GATAD2B
	ENSG00000171163	ZNF692
	ENSG00000172493	AFF1
	ENSG00000185129	PURA
	ENSG00000213676	ATF6B
	ENSG00000204231	RXRB
	ENSG00000065029	ZNF76
	ENSG00000112033	PPARD
	ENSG00000137166	FOXP4
	ENSG00000122515	ZMIZ2
	ENSG00000197037	ZSCAN25
	ENSG00000166925	TSC22D4
	ENSG00000170265	ZNF282
	ENSG00000250571	GLI4
	ENSG00000181135	ZNF707
	ENSG00000185122	HSF1
	ENSG00000106948	AKNA
	ENSG00000196152	ZNF79
	ENSG00000165684	SNAPC4
	ENSG00000019485	PRDM11
	ENSG00000149136	SSRP1
	ENSG00000149480	MTA2
	ENSG00000107485	GATA3
	ENSG00000184271	POU6F1
	ENSG00000196498	NCOR2
	ENSG00000119725	ZNF410
	ENSG00000182979	MTA1
	ENSG00000166949	SMAD3
	ENSG00000176371	ZSCAN2
	ENSG00000167967	E4F1
	ENSG00000006194	ZNF263
	ENSG00000153048	CARHSP1
	ENSG00000103495	MAZ
	ENSG00000158805	ZNF276
	ENSG00000070444	MNT
	ENSG00000108509	CAMTA2
	ENSG00000125846	ZNF133
	ENSG00000198026	ZNF335
	ENSG00000125520	SLC2A4RG
	ENSG00000130584	ZBTB46
	ENSG00000133250	ZNF414
	ENSG00000132005	RFX1
	ENSG00000011451	WIZ
	ENSG00000160113	NR2F6
	ENSG00000105698	USF2
	ENSG00000079432	CIC
	ENSG00000218891	ZNF579
	ENSG00000179943	FIZ1
	ENSG00000213015	ZNF580
	ENSG00000167685	ZNF444
	ENSG00000171606	ZNF274
	ENSG00000083838	ZNF446
	ENSG00000184436	THAP7

## Sheet: blue
Supplementary Table 7: List of detected TFs per non-preserved module
TFs_info	Gene_id	Symbol
183	ENSG00000188290	HES4
	ENSG00000130940	CASZ1
	ENSG00000116731	PRDM2
	ENSG00000117318	ID3
	ENSG00000116560	SFPQ
	ENSG00000185668	POU3F1
	ENSG00000117000	RLF
	ENSG00000198815	FOXJ3
	ENSG00000162664	ZNF326
	ENSG00000122482	ZNF644
	ENSG00000116604	MEF2D
	ENSG00000117036	ETV3
	ENSG00000185278	ZBTB37
	ENSG00000158711	ELK4
	ENSG00000162772	ATF3
	ENSG00000153207	AHCTF1
	ENSG00000196418	ZNF124
	ENSG00000075426	FOSL2
	ENSG00000152518	ZFP36L2
	ENSG00000162924	REL
	ENSG00000059728	MXD1
	ENSG00000135625	EGR4
	ENSG00000196843	ARID5A
	ENSG00000115112	TFCP2L1
	ENSG00000169554	ZEB2
	ENSG00000153234	NR4A2
	ENSG00000172845	SP3
	ENSG00000116044	NFE2L2
	ENSG00000118263	KLF7
	ENSG00000079263	SP140
	ENSG00000134107	BHLHE40
	ENSG00000174738	NR1D2
	ENSG00000144655	CSRNP1
	ENSG00000114439	BBX
	ENSG00000181722	ZBTB20
	ENSG00000114126	TFDP2
	ENSG00000196428	TSC22D2
	ENSG00000113916	BCL6
	ENSG00000114315	HES1
	ENSG00000109685	NSD2
	ENSG00000109787	KLF3
	ENSG00000134852	CLOCK
	ENSG00000168152	THAP9
	ENSG00000109320	NFKB1
	ENSG00000109381	ELF2
	ENSG00000173545	ZNF622
	ENSG00000172262	ZNF131
	ENSG00000125347	IRF1
	ENSG00000137265	IRF4
	ENSG00000095951	HIVEP1
	ENSG00000008083	JARID2
	ENSG00000096654	ZNF184
	ENSG00000197279	ZNF165
	ENSG00000196812	ZSCAN16
	ENSG00000198315	ZKSCAN8
	ENSG00000235109	ZSCAN31
	ENSG00000001167	NFYA
	ENSG00000112658	SRF
	ENSG00000124813	RUNX2
	ENSG00000057657	PRDM1
	ENSG00000118689	FOXO3
	ENSG00000029363	BCLAF1
	ENSG00000181472	ZBTB2
	ENSG00000029639	TFB1M
	ENSG00000198517	MAFK
	ENSG00000234444	ZNF736
	ENSG00000135164	DMTF1
	ENSG00000160908	ZNF394
	ENSG00000105856	HBP1
	ENSG00000048405	ZNF800
	ENSG00000005889	ZFX
	ENSG00000102349	KLF8
	ENSG00000198205	ZXDA
	ENSG00000184481	FOXO4
	ENSG00000157514	TSC22D3
	ENSG00000056277	ZNF280C
	ENSG00000179388	EGR3
	ENSG00000167034	NKX3-1
	ENSG00000186918	ZNF395
	ENSG00000198846	TOX
	ENSG00000205189	ZBTB10
	ENSG00000164920	OSR2
	ENSG00000155090	KLF10
	ENSG00000196150	ZNF250
	ENSG00000168795	ZBTB5
	ENSG00000119138	KLF9
	ENSG00000127081	ZNF484
	ENSG00000119508	NR4A3
	ENSG00000169155	ZBTB43
	ENSG00000133794	ARNTL
	ENSG00000175592	FOSL1
	ENSG00000196323	ZBTB44
	ENSG00000067082	KLF6
	ENSG00000150347	ARID5B
	ENSG00000122877	EGR2
	ENSG00000119950	MXI1
	ENSG00000148737	TCF7L2
	ENSG00000095574	IKZF5
	ENSG00000060138	YBX3
	ENSG00000123358	NR4A1
	ENSG00000175197	DDIT3
	ENSG00000173451	THAP2
	ENSG00000179195	ZNF664
	ENSG00000198393	ZNF26
	ENSG00000214029	ZNF891
	ENSG00000256223	ZNF10
	ENSG00000120690	ELF1
	ENSG00000102554	KLF5
	ENSG00000118922	KLF12
	ENSG00000165804	ZNF219
	ENSG00000100644	HIF1A
	ENSG00000126804	ZBTB1
	ENSG00000127152	BCL11B
	ENSG00000181827	RFX7
	ENSG00000069667	RORA
	ENSG00000166716	ZNF592
	ENSG00000167981	ZNF597
	ENSG00000189067	LITAF
	ENSG00000155592	ZKSCAN2
	ENSG00000156853	ZNF689
	ENSG00000167394	ZNF668
	ENSG00000185947	ZNF267
	ENSG00000072736	NFATC3
	ENSG00000167377	ZNF23
	ENSG00000225614	ZNF469
	ENSG00000177374	HIC1
	ENSG00000176160	HSF5
	ENSG00000129654	FOXJ1
	ENSG00000197063	MAFG
	ENSG00000177426	TGIF1
	ENSG00000101665	SMAD7
	ENSG00000101544	ADNP2
	ENSG00000125812	GZF1
	ENSG00000101412	E2F1
	ENSG00000204103	MAFB
	ENSG00000101057	MYBL2
	ENSG00000124216	SNAI1
	ENSG00000124203	ZNF831
	ENSG00000175691	ZNF77
	ENSG00000130803	ZNF317
	ENSG00000197961	ZNF121
	ENSG00000196757	ZNF700
	ENSG00000196646	ZNF136
	ENSG00000197857	ZNF44
	ENSG00000173875	ZNF791
	ENSG00000171223	JUNB
	ENSG00000127528	KLF2
	ENSG00000130522	JUND
	ENSG00000105708	ZNF14
	ENSG00000197124	ZNF682
	ENSG00000196357	ZNF565
	ENSG00000186020	ZNF529
	ENSG00000171827	ZNF570
	ENSG00000180479	ZNF571
	ENSG00000120784	ZFP30
	ENSG00000105722	ERF
	ENSG00000159885	ZNF222
	ENSG00000159917	ZNF235
	ENSG00000104856	RELB
	ENSG00000170684	ZNF296
	ENSG00000125740	FOSB
	ENSG00000142528	ZNF473
	ENSG00000131408	NR1H2
	ENSG00000256683	ZNF350
	ENSG00000142556	ZNF614
	ENSG00000256087	ZNF432
	ENSG00000198046	ZNF667
	ENSG00000204524	ZNF805
	ENSG00000197714	ZNF460
	ENSG00000152433	ZNF547
	ENSG00000188785	ZNF548
	ENSG00000186230	ZNF749
	ENSG00000213762	ZNF134
	ENSG00000269343	ZNF587B
	ENSG00000173480	ZNF417
	ENSG00000152454	ZNF256
	ENSG00000169635	HIC2
	ENSG00000100219	XBP1
	ENSG00000185022	MAFF
	ENSG00000128272	ATF4
	ENSG00000100426	ZBED4
	ENSG00000157557	ETS2
	ENSG00000173276	ZBTB21

## Sheet: brown
Supplementary Table 7: List of detected TFs per non-preserved module
TFs_info	Gene_id	Symbol
33	ENSG00000007968	E2F2
	ENSG00000177606	JUN
	ENSG00000188295	ZNF669
	ENSG00000115415	STAT1
	ENSG00000067066	SP100
	ENSG00000132170	PPARG
	ENSG00000169981	ZNF35
	ENSG00000188313	PLSCR1
	ENSG00000272602	ZNF595
	ENSG00000173011	TADA2B
	ENSG00000170365	SMAD1
	ENSG00000164104	HMGB2
	ENSG00000169131	ZNF354A
	ENSG00000158691	ZSCAN12
	ENSG00000050344	NFE2L3
	ENSG00000153814	JAZF1
	ENSG00000105967	TFEC
	ENSG00000059378	PARP12
	ENSG00000167081	PBX3
	ENSG00000125482	TTF1
	ENSG00000183621	ZNF438
	ENSG00000111269	CREBL2
	ENSG00000165891	E2F7
	ENSG00000111145	ELK3
	ENSG00000129534	MIS18BP1
	ENSG00000178573	MAF
	ENSG00000073584	SMARCE1
	ENSG00000005102	MEOX1
	ENSG00000154655	L3MBTL4
	ENSG00000134046	MBD2
	ENSG00000020256	ZFP64
	ENSG00000188033	ZNF490
	ENSG00000245680	ZNF585B

## Sheet: darkred
Supplementary Table 7: List of detected TFs per non-preserved module
TFs_info	Gene_id	Symbol
12	ENSG00000115568	ZNF142
	ENSG00000248483	POU5F2
	ENSG00000204946	ZNF783
	ENSG00000170322	NFRKB
	ENSG00000172819	RARG
	ENSG00000125952	MAX
	ENSG00000103199	ZNF500
	ENSG00000174282	ZBTB4
	ENSG00000130684	ZNF337
	ENSG00000196724	ZNF418
	ENSG00000185252	ZNF74
	ENSG00000100105	PATZ1

## Sheet: greenyellow
Supplementary Table 7: List of detected TFs per non-preserved module
TFs_info	Gene_id	Symbol
71	ENSG00000041988	THAP3
	ENSG00000164011	ZNF691
	ENSG00000275111	ZNF2
	ENSG00000177842	ZNF620
	ENSG00000185219	ZNF445
	ENSG00000186446	ZNF501
	ENSG00000182903	ZNF721
	ENSG00000178338	ZNF354B
	ENSG00000124613	ZNF391
	ENSG00000187626	ZKSCAN4
	ENSG00000189298	ZKSCAN3
	ENSG00000185811	IKZF1
	ENSG00000197362	ZNF786
	ENSG00000136997	MYC
	ENSG00000185730	ZNF696
	ENSG00000183309	ZNF623
	ENSG00000172273	HINFP
	ENSG00000065970	FOXJ2
	ENSG00000123095	BHLHE41
	ENSG00000139651	ZNF740
	ENSG00000179627	ZBTB42
	ENSG00000162086	ZNF75A
	ENSG00000169951	ZNF764
	ENSG00000276234	TADA2A
	ENSG00000173917	HOXB2
	ENSG00000088876	ZNF343
	ENSG00000172006	ZNF554
	ENSG00000087903	RFX2
	ENSG00000130544	ZNF557
	ENSG00000171469	ZNF561
	ENSG00000197933	ZNF823
	ENSG00000197054	ZNF763
	ENSG00000237440	ZNF737
	ENSG00000118620	ZNF430
	ENSG00000197841	ZNF181
	ENSG00000168661	ZNF30
	ENSG00000254004	ZNF260
	ENSG00000161298	ZNF382
	ENSG00000185869	ZNF829
	ENSG00000198453	ZNF568
	ENSG00000197050	ZNF420
	ENSG00000187187	ZNF546
	ENSG00000128000	ZNF780B
	ENSG00000167625	ZNF526
	ENSG00000124459	ZNF45
	ENSG00000159882	ZNF230
	ENSG00000263002	ZNF234
	ENSG00000167380	ZNF226
	ENSG00000105497	ZNF175
	ENSG00000176024	ZNF613
	ENSG00000197619	ZNF615
	ENSG00000204611	ZNF616
	ENSG00000196214	ZNF766
	ENSG00000221923	ZNF880
	ENSG00000198538	ZNF28
	ENSG00000180257	ZNF816
	ENSG00000170954	ZNF415
	ENSG00000197937	ZNF347
	ENSG00000197497	ZNF665
	ENSG00000198440	ZNF583
	ENSG00000197016	ZNF470
	ENSG00000127903	ZNF835
	ENSG00000178229	ZNF543
	ENSG00000251369	ZNF550
	ENSG00000083817	ZNF416
	ENSG00000171649	ZIK1
	ENSG00000183647	ZNF530
	ENSG00000121417	ZNF211
	ENSG00000083814	ZNF671
	ENSG00000176293	ZNF135
	ENSG00000160199	PKNOX1

## Sheet: grey60
Supplementary Table 7: List of detected TFs per non-preserved module
TFs_info	Gene_id	Symbol
12	ENSG00000144218	AFF3
	ENSG00000197385	ZNF860
	ENSG00000171467	ZNF318
	ENSG00000133740	E2F5
	ENSG00000196092	PAX5
	ENSG00000078246	TULP3
	ENSG00000152217	SETBP1
	ENSG00000196628	TCF4
	ENSG00000131196	NFATC1
	ENSG00000071564	TCF3
	ENSG00000184635	ZNF93
	ENSG00000269404	SPIB

## Sheet: lightgreen
Supplementary Table 7: List of detected TFs per non-preserved module
TFs_info	Gene_id	Symbol
14	ENSG00000065978	YBX1
	ENSG00000115738	ID2
	ENSG00000115956	PLEK
	ENSG00000118513	MYB
	ENSG00000106546	AHR
	ENSG00000106004	HOXA5
	ENSG00000146676	PURB
	ENSG00000165030	NFIL3
	ENSG00000129173	E2F8
	ENSG00000198176	TFDP1
	ENSG00000089902	RCOR1
	ENSG00000140968	IRF8
	ENSG00000125968	ID1
	ENSG00000067646	ZFY

## Sheet: lightyellow
Supplementary Table 7: List of detected TFs per non-preserved module
TFs_info	Gene_id	Symbol
5	ENSG00000145220	LYAR
	ENSG00000171476	HOPX
	ENSG00000073861	TBX21
	ENSG00000088881	EBF4
	ENSG00000101096	NFATC2

## Sheet: midnightblue
Supplementary Table 7: List of detected TFs per non-preserved module
TFs_info	Gene_id	Symbol
10	ENSG00000176083	ZNF683
	ENSG00000162676	GFI1
	ENSG00000143995	MEIS1
	ENSG00000177311	ZBTB38
	ENSG00000178860	MSC
	ENSG00000124920	MYRF
	ENSG00000136770	DNAJC1
	ENSG00000111206	FOXM1
	ENSG00000213928	IRF9
	ENSG00000102984	ZNF821

## Sheet: pink
Supplementary Table 7: List of detected TFs per non-preserved module
TFs_info	Gene_id	Symbol
34	ENSG00000198160	MIER1
	ENSG00000054267	ARID4B
	ENSG00000134317	GRHL1
	ENSG00000172059	KLF11
	ENSG00000115816	CEBPZ
	ENSG00000005436	GCFC2
	ENSG00000064933	PMS1
	ENSG00000138378	STAT4
	ENSG00000185404	SP140L
	ENSG00000093167	LRRFIP2
	ENSG00000175105	ZNF654
	ENSG00000121864	ZNF639
	ENSG00000170448	NFXL1
	ENSG00000113387	SUB1
	ENSG00000062194	GPBP1
	ENSG00000145908	ZNF300
	ENSG00000164463	CREBRF
	ENSG00000010030	ETV7
	ENSG00000146757	ZNF92
	ENSG00000105821	DNAJC2
	ENSG00000165259	HDX
	ENSG00000029993	HMGB3
	ENSG00000185697	MYBL1
	ENSG00000110693	SOX6
	ENSG00000137492	THAP12
	ENSG00000095794	CREM
	ENSG00000108064	TFAM
	ENSG00000120798	NR2C1
	ENSG00000090612	ZNF268
	ENSG00000102804	TSC22D1
	ENSG00000104177	MYEF2
	ENSG00000137871	ZNF280D
	ENSG00000184517	ZFP1
	ENSG00000078043	PIAS2

[truncated: 5 more sheets: purple, red, royalblue, turquoise, yellow]
