# Supplementary material for: Differential Co-Expression Network Analysis Reveals Key Hub-High Traffic Genes as Potential Therapeutic Targets for COVID-19 Pandemic
Source: Front Immunol. 2021 Dec 15;12:789317. doi: 10.3389/fimmu.2021.789317 (PMC8714803; doi:10.3389/fimmu.2021.789317)
Supplement: Supplementary file 9 [file Table_8.xlsx]

## Sheet: black
Supplementary Table 8: Complete list of hub TFs identified for each non-preserved module
HubTFs_info	Gene_id	Symbol	kMEblack	kMEblack_pvalue
26	ENSG00000106948	AKNA	0.901002	8.04914e-07
	ENSG00000198026	ZNF335	0.874634	4.37022e-06
	ENSG00000125520	SLC2A4RG	0.841493	2.29474e-05
	ENSG00000250571	GLI4	0.83867	2.59701e-05
	ENSG00000204231	RXRB	0.838191	2.65145e-05
	ENSG00000165684	SNAPC4	0.821006	5.36152e-05
	ENSG00000182979	MTA1	0.812159	7.49073e-05
	ENSG00000166925	TSC22D4	0.808707	8.49528e-05
	ENSG00000103495	MAZ	0.807308	8.93374e-05
	ENSG00000172493	AFF1	0.806298	9.26181e-05
	ENSG00000171163	ZNF692	0.78737	0.000175669
	ENSG00000185129	PURA	0.783001	0.000201834
	ENSG00000133250	ZNF414	0.781895	0.000208954
	ENSG00000218891	ZNF579	0.780692	0.000216929
	ENSG00000125846	ZNF133	0.775122	0.000257276
	ENSG00000170265	ZNF282	0.765608	0.00034065
	ENSG00000158805	ZNF276	0.762554	0.000371773
	ENSG00000065029	ZNF76	0.752493	0.000491553
	ENSG00000213676	ATF6B	0.746229	0.000581177
	ENSG00000167685	ZNF444	0.733239	0.000810675
	ENSG00000011451	WIZ	0.729785	0.000882937
	ENSG00000149480	MTA2	0.728761	0.000905365
	ENSG00000079432	CIC	0.72681	0.000949383
	ENSG00000179943	FIZ1	0.722292	0.00105814
	ENSG00000105698	USF2	0.705267	0.0015646
	ENSG00000153048	CARHSP1	0.70436	0.00159635

## Sheet: blue
Supplementary Table 8: Complete list of hub TFs identified for each non-preserved module
HubTFs_info	Gene_id	Symbol	kMEblue	kMEblue_pvalue
110	ENSG00000185022	MAFF	0.963537	5.40166e-10
	ENSG00000205189	ZBTB10	0.959984	1.07377e-09
	ENSG00000175592	FOSL1	0.958875	1.31384e-09
	ENSG00000144655	CSRNP1	0.948841	6.55979e-09
	ENSG00000101544	ADNP2	0.948466	6.9216e-09
	ENSG00000135625	EGR4	0.941612	1.73059e-08
	ENSG00000175197	DDIT3	0.939853	2.15113e-08
	ENSG00000153234	NR4A2	0.939497	2.246e-08
	ENSG00000174738	NR1D2	0.939012	2.38132e-08
	ENSG00000117036	ETV3	0.93785	2.73396e-08
	ENSG00000177426	TGIF1	0.937553	2.83113e-08
	ENSG00000197279	ZNF165	0.937118	2.9784e-08
	ENSG00000185668	POU3F1	0.936673	3.1362e-08
	ENSG00000160908	ZNF394	0.931945	5.30733e-08
	ENSG00000116560	SFPQ	0.927291	8.5977e-08
	ENSG00000123358	NR4A1	0.927212	8.66576e-08
	ENSG00000119508	NR4A3	0.927008	8.84468e-08
	ENSG00000124216	SNAI1	0.925669	1.00966e-07
	ENSG00000173276	ZBTB21	0.923823	1.20695e-07
	ENSG00000114315	HES1	0.921713	1.47221e-07
	ENSG00000162772	ATF3	0.920084	1.70979e-07
	ENSG00000095574	IKZF5	0.918262	2.01384e-07
	ENSG00000128272	ATF4	0.916268	2.39863e-07
	ENSG00000125740	FOSB	0.915075	2.6579e-07
	ENSG00000109320	NFKB1	0.913688	2.98889e-07
	ENSG00000169155	ZBTB43	0.912648	3.2596e-07
	ENSG00000157514	TSC22D3	0.912563	3.28266e-07
	ENSG00000131408	NR1H2	0.908683	4.49389e-07
	ENSG00000125347	IRF1	0.905975	5.55054e-07
	ENSG00000059728	MXD1	0.902792	7.05727e-07
	ENSG00000029363	BCLAF1	0.899803	8.77787e-07
	ENSG00000117000	RLF	0.892965	1.41107e-06
	ENSG00000101665	SMAD7	0.890933	1.615e-06
	ENSG00000119138	KLF9	0.888587	1.8811e-06
	ENSG00000114439	BBX	0.887184	2.05752e-06
	ENSG00000127528	KLF2	0.881343	2.95207e-06
	ENSG00000100644	HIF1A	0.880385	3.12668e-06
	ENSG00000196757	ZNF700	0.878972	3.39998e-06
	ENSG00000125812	GZF1	0.875927	4.05906e-06
	ENSG00000130522	JUND	0.869627	5.77406e-06
	ENSG00000069667	RORA	0.864124	7.74309e-06
	ENSG00000102554	KLF5	0.862495	8.42513e-06
	ENSG00000168795	ZBTB5	0.861374	8.92372e-06
	ENSG00000116731	PRDM2	0.861263	8.9745e-06
	ENSG00000075426	FOSL2	0.859125	9.99988e-06
	ENSG00000197063	MAFG	0.855855	1.17601e-05
	ENSG00000122482	ZNF644	0.852863	1.35949e-05
	ENSG00000126804	ZBTB1	0.850558	1.51683e-05
	ENSG00000105722	ERF	0.847811	1.72439e-05
	ENSG00000173875	ZNF791	0.846498	1.8318e-05
	ENSG00000096654	ZNF184	0.84633	1.8459e-05
	ENSG00000197857	ZNF44	0.845373	1.92823e-05
	ENSG00000198393	ZNF26	0.844545	2.00196e-05
	ENSG00000158711	ELK4	0.831593	3.50644e-05
	ENSG00000179388	EGR3	0.831321	3.54613e-05
	ENSG00000134107	BHLHE40	0.824851	4.60994e-05
	ENSG00000196418	ZNF124	0.823093	4.94164e-05
	ENSG00000048405	ZNF800	0.816299	6.41952e-05
	ENSG00000135164	DMTF1	0.81359	7.10471e-05
	ENSG00000214029	ZNF891	0.810101	8.07681e-05
	ENSG00000256223	ZNF10	0.809293	8.31735e-05
	ENSG00000162664	ZNF326	0.808289	8.62428e-05
	ENSG00000109787	KLF3	0.80633	9.25122e-05
	ENSG00000173545	ZNF622	0.8062	9.29405e-05
	ENSG00000180479	ZNF571	0.805995	9.36217e-05
	ENSG00000150347	ARID5B	0.803095	0.000103703
	ENSG00000116604	MEF2D	0.799919	0.00011577
	ENSG00000172845	SP3	0.797733	0.00012475
	ENSG00000124203	ZNF831	0.792218	0.000150027
	ENSG00000105856	HBP1	0.791707	0.000152572
	ENSG00000060138	YBX3	0.790912	0.000156605
	ENSG00000168152	THAP9	0.788356	0.000170179
	ENSG00000198315	ZKSCAN8	0.785559	0.000186146
	ENSG00000105708	ZNF14	0.781107	0.000214148
	ENSG00000185947	ZNF267	0.778819	0.000229855
	ENSG00000181722	ZBTB20	0.777672	0.000238088
	ENSG00000181472	ZBTB2	0.775862	0.000251579
	ENSG00000113916	BCL6	0.774425	0.000262741
	ENSG00000109381	ELF2	0.773467	0.000270404
	ENSG00000176160	HSF5	0.763757	0.000359241
	ENSG00000171827	ZNF570	0.760347	0.000395706
	ENSG00000152518	ZFP36L2	0.759621	0.000403856
	ENSG00000234444	ZNF736	0.758996	0.000410978
	ENSG00000204524	ZNF805	0.758547	0.000416166
	ENSG00000133794	ARNTL	0.756521	0.000440242
	ENSG00000155090	KLF10	0.756104	0.000445329
	ENSG00000153207	AHCTF1	0.75428	0.000468204
	ENSG00000104856	RELB	0.752474	0.0004918
	ENSG00000001167	NFYA	0.750435	0.000519631
	ENSG00000095951	HIVEP1	0.748318	0.00054989
	ENSG00000198517	MAFK	0.743652	0.00062178
	ENSG00000162924	REL	0.741742	0.00065338
	ENSG00000256087	ZNF432	0.739599	0.000690413
	ENSG00000124813	RUNX2	0.736919	0.000739136
	ENSG00000137265	IRF4	0.736859	0.000740265
	ENSG00000167377	ZNF23	0.736563	0.00074582
	ENSG00000184481	FOXO4	0.735489	0.000766294
	ENSG00000117318	ID3	0.735145	0.000772933
	ENSG00000167981	ZNF597	0.728836	0.0009037
	ENSG00000189067	LITAF	0.725822	0.000972349
	ENSG00000173451	THAP2	0.721112	0.00108819
	ENSG00000057657	PRDM1	0.716538	0.00121135
	ENSG00000157557	ETS2	0.713846	0.00128906
	ENSG00000167034	NKX3-1	0.711305	0.00136613
	ENSG00000256683	ZNF350	0.710033	0.00140611
	ENSG00000134852	CLOCK	0.706461	0.00152358
	ENSG00000197714	ZNF460	0.705961	0.00154065
	ENSG00000142528	ZNF473	0.705105	0.00157024
	ENSG00000056277	ZNF280C	0.703048	0.00164325
	ENSG00000164920	OSR2	0.700467	0.00173878

## Sheet: brown
Supplementary Table 8: Complete list of hub TFs identified for each non-preserved module
HubTFs_info	Gene_id	Symbol	kMEbrown	kMEbrown
5	ENSG00000105967	TFEC	0.832371	3.39492e-05
	ENSG00000111269	CREBL2	0.790398	0.00015926
	ENSG00000129534	MIS18BP1	0.776194	0.000249057
	ENSG00000134046	MBD2	0.774509	0.000262071
	ENSG00000183621	ZNF438	0.757294	0.000430923

## Sheet: darkred
Supplementary Table 8: Complete list of hub TFs identified for each non-preserved module
HubTFs_info	Gene_id	Symbol	kMEdarkred	kMEdarkred_pvalue
8	ENSG00000100105	PATZ1	0.926317	9.47304e-08
	ENSG00000174282	ZBTB4	0.860119	9.51147e-06
	ENSG00000130684	ZNF337	0.848823	1.64534e-05
	ENSG00000204946	ZNF783	0.843381	2.10968e-05
	ENSG00000103199	ZNF500	0.821361	5.2879e-05
	ENSG00000170322	NFRKB	0.807266	8.94704e-05
	ENSG00000185252	ZNF74	0.760172	0.000397657
	ENSG00000115568	ZNF142	0.756393	0.000441799

## Sheet: greenyellow
Supplementary Table 8: Complete list of hub TFs identified for each non-preserved module
HubTFs_info	Gene_id	Symbol	kMEgreenyellow	kMEgreenyellow_pvalue
42	ENSG00000164011	ZNF691	0.924883	1.08994e-07
	ENSG00000179627	ZBTB42	0.892189	1.48613e-06
	ENSG00000176024	ZNF613	0.888995	1.83231e-06
	ENSG00000083814	ZNF671	0.888993	1.8326e-06
	ENSG00000254004	ZNF260	0.871738	5.14131e-06
	ENSG00000197016	ZNF470	0.870167	5.60611e-06
	ENSG00000197362	ZNF786	0.847607	1.74071e-05
	ENSG00000186446	ZNF501	0.846614	1.82208e-05
	ENSG00000083817	ZNF416	0.829659	3.79737e-05
	ENSG00000185730	ZNF696	0.825881	4.42466e-05
	ENSG00000183647	ZNF530	0.816928	6.26868e-05
	ENSG00000171649	ZIK1	0.815479	6.62067e-05
	ENSG00000167380	ZNF226	0.813828	7.04198e-05
	ENSG00000167625	ZNF526	0.811692	7.62054e-05
	ENSG00000124459	ZNF45	0.810873	7.85248e-05
	ENSG00000263002	ZNF234	0.809379	8.29149e-05
	ENSG00000180257	ZNF816	0.809277	8.32204e-05
	ENSG00000198440	ZNF583	0.807243	8.95443e-05
	ENSG00000169951	ZNF764	0.804197	9.97669e-05
	ENSG00000041988	THAP3	0.804156	9.99122e-05
	ENSG00000198453	ZNF568	0.798305	0.000122343
	ENSG00000178229	ZNF543	0.797032	0.000127747
	ENSG00000127903	ZNF835	0.79483	0.000137568
	ENSG00000171469	ZNF561	0.793141	0.000145521
	ENSG00000275111	ZNF2	0.79191	0.000151555
	ENSG00000162086	ZNF75A	0.791733	0.000152442
	ENSG00000204611	ZNF616	0.790697	0.00015771
	ENSG00000196214	ZNF766	0.789055	0.000166371
	ENSG00000187626	ZKSCAN4	0.784597	0.000191923
	ENSG00000198538	ZNF28	0.777048	0.000242666
	ENSG00000159882	ZNF230	0.76979	0.000301587
	ENSG00000128000	ZNF780B	0.769109	0.000307686
	ENSG00000121417	ZNF211	0.767837	0.000319337
	ENSG00000183309	ZNF623	0.760696	0.000391834
	ENSG00000168661	ZNF30	0.758681	0.00041461
	ENSG00000185219	ZNF445	0.75742	0.000429417
	ENSG00000177842	ZNF620	0.734629	0.000783016
	ENSG00000139651	ZNF740	0.729545	0.000888144
	ENSG00000136997	MYC	0.723487	0.00102841
	ENSG00000251369	ZNF550	0.720458	0.00110512
	ENSG00000172273	HINFP	0.720346	0.00110806
	ENSG00000197050	ZNF420	0.705549	0.00155485

## Sheet: grey60
Supplementary Table 8: Complete list of hub TFs identified for each non-preserved module
HubTFs_info	Gene_id	Symbol	kMEgrey60	kMEgrey60_pvalue
8	ENSG00000269404	SPIB	0.8648	7.4739e-06
	ENSG00000133740	E2F5	0.852397	1.39013e-05
	ENSG00000196628	TCF4	0.829516	3.81952e-05
	ENSG00000196092	PAX5	0.826464	4.32245e-05
	ENSG00000071564	TCF3	0.7736	0.000269331
	ENSG00000131196	NFATC1	0.768681	0.000311569
	ENSG00000197385	ZNF860	0.762148	0.000376081
	ENSG00000144218	AFF3	0.741603	0.00065573

## Sheet: lightgreen
Supplementary Table 8: Complete list of hub TFs identified for each non-preserved module
HubTFs_info	Gene_id	Symbol	kMElightgreen	kMElightgreen_pvalue
8	ENSG00000106546	AHR	0.912832	3.21019e-07
	ENSG00000146676	PURB	0.898745	9.46773e-07
	ENSG00000165030	NFIL3	0.898226	9.82265e-07
	ENSG00000140968	IRF8	0.841489	2.29513e-05
	ENSG00000065978	YBX1	0.807251	8.95204e-05
	ENSG00000115956	PLEK	0.764339	0.000353307
	ENSG00000198176	TFDP1	0.741894	0.000650817
	ENSG00000125968	ID1	0.71282	0.00131975

## Sheet: lightyellow
Supplementary Table 8: Complete list of hub TFs identified for each non-preserved module
HubTFs_info	Gene_id	Symbol	kMElightyellow	kMElightyellow
2	ENSG00000073861	TBX21	0.921562	1.49305e-07
	ENSG00000171476	HOPX	0.775825	0.000251859

## Sheet: midnightblue
Supplementary Table 8: Complete list of hub TFs identified for each non-preserved module
HubTFs_info	Gene_id	Symbol	kMEmidnightblue	kMEmidnightblue_pvalue
5	ENSG00000162676	GFI1	0.830941	3.60226e-05
	ENSG00000136770	DNAJC1	0.773839	0.000267407
	ENSG00000178860	MSC	0.765507	0.000341643
	ENSG00000177311	ZBTB38	0.716569	0.00121047
	ENSG00000176083	ZNF683	0.701896	0.00168533

## Sheet: pink
Supplementary Table 8: Complete list of hub TFs identified for each non-preserved module
HubTFs_info	Gene_id	Symbol	kMEpink	kMEpink_pvalue
16	ENSG00000198160	MIER1	0.923064	1.29719e-07
	ENSG00000113387	SUB1	0.89586	1.15879e-06
	ENSG00000062194	GPBP1	0.892293	1.4759e-06
	ENSG00000120798	NR2C1	0.873811	4.57859e-06
	ENSG00000105821	DNAJC2	0.873536	4.6502e-06
	ENSG00000164463	CREBRF	0.860026	9.55603e-06
	ENSG00000175105	ZNF654	0.809559	8.23739e-05
	ENSG00000115816	CEBPZ	0.807682	8.8147e-05
	ENSG00000110693	SOX6	0.778394	0.000232881
	ENSG00000054267	ARID4B	0.766928	0.000327896
	ENSG00000093167	LRRFIP2	0.740134	0.000681
	ENSG00000005436	GCFC2	0.738615	0.000707976
	ENSG00000104177	MYEF2	0.730658	0.000864184
	ENSG00000165259	HDX	0.706842	0.00151067
	ENSG00000078043	PIAS2	0.705535	0.0015553
	ENSG00000121864	ZNF639	0.700406	0.00174107

[truncated: 5 more sheets: purple, red, royalblue, turquoise, yellow]
