# Supplementary material for: Differential Co-Expression Network Analysis Reveals Key Hub-High Traffic Genes as Potential Therapeutic Targets for COVID-19 Pandemic
Source: Front Immunol. 2021 Dec 15;12:789317. doi: 10.3389/fimmu.2021.789317 (PMC8714803; doi:10.3389/fimmu.2021.789317)
Supplement: Supplementary file 10 [file Table_9.xlsx]

## Sheet: blue
Supplementary Table 9: List of hub-high traffic genes identified in the candidate non-preserved modules along with their BC scores by both Cytohubba and Igraph methods
Rank	Name	Cytuhubba_score	Igraph_score
1	EP300	46534	23267
2	UBB	44341.9	22170.9
3	CDK1	30697.9	15348.9
4	VEGFA	30085.3	15042.7
5	TNF	26289.4	13144.7
6	CTNNB1	25262.1	12631
7	IL6	23964.6	11982.3
8	SIRT1	22709.2	11354.6
9	NFKB1	17024.7	8512.37
10	TFRC	16695.5	8347.77
11	RANBP2	15725.5	7862.75
12	HSP90AB1	14611.5	7305.75
13	UBXN7	13435.5	6717.74
14	IL10	11859	5929.5
15	CYCS	11698.5	5849.24
16	IL1B	10106.9	5053.43
17	EZR	9672.22	4836.11
18	RPLP0	9640.17	4820.08
19	HIF1A	9587.55	4793.77
20	CDKN1A	9415.82	4707.91
21	HSPA9	9339.83	4669.92
22	EIF4A3	9215.91	4607.96
23	CCNT1	9081.35	4540.67
24	ATF4	9048.48	4524.24
25	PIK3CA	8650.39	4325.19
26	PIK3R1	8066.25	4033.12
27	ATF3	7810.21	3905.11
28	NR4A1	7382.63	3691.31
29	SOCS3	7223.28	3611.64
30	HNRNPL	7039.95	3519.97
31	BRWD3	6854.88	3427.44
32	LDLR	6727.1	3363.55
33	H2AFX	6679.12	3339.56
34	SOCS1	6397.47	3198.74
35	TNFAIP3	6370.03	3185.01
36	GOLGB1	6330.24	3165.12
37	AP4B1	6311.27	3155.64
38	OGT	6247.28	3123.64
39	DDX3X	6100.44	3050.22
40	POLR1C	5872.81	2936.41
41	KLHL11	5672.92	2836.46
42	BCL6	5319.18	2659.59
43	ANAPC1	5304.33	2652.17
44	SF1	5265.18	2632.59
45	CXCR4	5097.51	2548.75
46	RBMX	5097.26	2548.63
47	ICAM1	5091.22	2545.61
48	DDX24	5083.71	2541.86
49	MATR3	5064.73	2532.37
50	RLIM	5012.87	2506.44

## Sheet: brown
Supplementary Table 9: List of hub-high traffic genes identified in the candidate non-preserved modules along with their BC scores by both Cytohubba and Igraph methods
Rank	Name	Cytohubba_score	Igraph_score
1	RBX1	5896.36	2948.18
2	PSMB2	5800.79	2900.39
3	PSMA3	5753.62	2876.81
4	PSMA6	5525.37	2762.69
5	PTEN	5222.08	2611.04
6	VPS29	5195.84	2597.92
7	NDUFAB1	4381.21	2190.6
8	SNRPE	4186.42	2093.21
9	PSMA4	4150.83	2075.42
10	TXN	3950.57	1975.28
11	PTGES3	3527.04	1763.52
12	RHOA	3439.04	1719.52
13	ATP5C1	3308.94	1654.47
14	CANX	3109.54	1554.77
15	VAMP7	3010.94	1505.47
16	B2M	2817.18	1408.59
17	GDI2	2538.26	1269.13
18	SNRPD1	2510.01	1255
19	UBE2L3	2443.31	1221.66
20	TXNL1	2380.81	1190.41
21	CCT8	2343.9	1171.95
22	SUMO1	2244.66	1122.33
23	UBE2D1	2201.91	1100.95
24	MCTS1	2176.44	1088.22
25	NDUFC2	2148.47	1074.24
26	PSMC2	2126.46	1063.23
27	RAB11A	2047.34	1023.67
28	REEP5	1889.02	944.51
29	CHMP5	1830.61	915.307
30	SPCS1	1816.82	908.412
31	VAMP3	1758.72	879.36
32	DECR1	1751.61	875.804
33	IDH1	1719.63	859.817
34	RAN	1684.66	842.329
35	CASP1	1678.85	839.425
36	UQCRQ	1663.13	831.566
37	RAB10	1657.35	828.675
38	MMADHC	1623.74	811.869
39	COMMD8	1583.67	791.835
40	LAMP2	1582.19	791.096
41	PSMD14	1477.24	738.622
42	PRDX3	1471.48	735.74
43	ACTR2	1469.03	734.515
44	TNFSF13B	1415.63	707.815
45	ARPC3	1400.21	700.105
46	CTSS	1353.08	676.54
47	TGOLN2	1345.88	672.938
48	MRPL13	1329.51	664.753
49	SEC61G	1308.72	654.358
50	CETN2	1284.2	642.102

## Sheet: grey60
Supplementary Table 9: List of hub-high traffic genes identified in the candidate non-preserved modules along with their BC scores by both Cytohubba and Igraph methods
Rank	Name	Cytohubba_score	Igraph_score
1	CD19	106.437	53.2185
2	IGLL5	104.322	52.1609
3	CD79B	80.5522	40.2761
4	CD79A	75.456	37.728
5	BLK	54.1778	27.0889
6	PNOC	50	25
7	SPIB	30.5829	15.2914
8	CD22	29.2611	14.6306
9	POU2AF1	20.9274	10.4637
10	TCF3	19.7378	9.86889

## Sheet: lightgreen
Supplementary Table 9: List of hub-high traffic genes identified in the candidate non-preserved modules along with their BC scores by both Cytohubba and Igraph methods
Rank	Name	Cytohubba_score	Igraph_score
1	GLUL	374.952	187.476
2	TRIB1	300.839	150.42
3	HSPA5	289.52	144.76
4	VIM	268.924	134.462
5	ARF4	264.63	132.315
6	PLEK	229.892	114.946
7	ACSL1	222.844	111.422
8	TUBA1B	203.276	101.638
9	IRAK3	198.638	99.3188
10	AHR	193.416	96.7081

## Sheet: lightyellow
Supplementary Table 9: List of hub-high traffic genes identified in the candidate non-preserved modules along with their BC scores by both Cytohubba and Igraph methods
Rank	Name	Cytohubba_score	Igraph_score
1	ERBB2	180	90
2	ADRB2	70	35
3	NCAM1	64.6667	32.3333
4	GZMB	59.7	29.85
4	PRF1	59.7	29.85
6	TBX21	37.2	18.6
7	GZMA	10.7	5.35
8	NKG7	3	1.5
9	KLRD1	2.36667	1.18333
10	B3GAT1	0.666667	0.333333

## Sheet: midnightblue
Supplementary Table 9: List of hub-high traffic genes identified in the candidate non-preserved modules along with their BC scores by both Cytohubba and Igraph methods
Rank	Name	Cytohubba_score	Igraph_score
1	CDKN2A	452.035	226.018
2	OASL	353.607	176.804
3	CCL5	327.01	163.505
4	MYO3B	274.859	137.43
5	MYO6	264.38	132.19
6	KIF19	187.587	93.7937
7	PPP2R2B	182.826	91.4128
8	KIF2C	132.267	66.1333
9	CD8A	124.093	62.0464
10	ATL1	107.298	53.6489

## Sheet: pink
Supplementary Table 9: List of hub-high traffic genes identified in the candidate non-preserved modules along with their BC scores by both Cytohubba and Igraph methods
Rank	Name	Cytohubba_score	Igraph_score
1	HSP90AA1	7722.7	3861.35
2	RPS27A	5955.19	2977.59
3	EZH2	2086.12	1043.06
4	CEP290	1493.61	746.805
5	NPM1	1424.64	712.319
6	HNRNPA1	1280.78	640.39
7	PPP2CA	1197.32	598.658
8	POLR2K	1163.07	581.534
9	TPT1	1034.94	517.47
10	EEF1A1	1021.17	510.587
11	RPL5	1018.06	509.029
12	EEF1B2	985.497	492.749
13	HSPD1	962.279	481.14
14	DDX5	957.265	478.632
15	HSPE1	945.425	472.713
16	ISCU	827.064	413.532
17	RPS3A	818.96	409.48
18	IFNG	818.614	409.307
19	CD59	753.176	376.588
20	RRM1	749.572	374.786
21	RPL21	749.098	374.549
22	RPGR	725.753	362.877
23	CCDC14	706	353
24	PTPRC	704	352
25	LDHA	608.357	304.178
26	MAD2L1	605.137	302.569
27	EIF4B	572.418	286.209
28	RPL9	560.728	280.364
29	SF3B1	551.741	275.87
30	NOP58	550.357	275.179
31	HNRNPDL	546.645	273.322
32	NCL	506.983	253.491
33	RPS25	500.968	250.484
34	CALM1	484.566	242.283
35	MAGOH	455.12	227.56
36	EIF4A2	448.493	224.247
37	RPS12	447.019	223.509
38	RPS6	445.108	222.554
39	TAF9B	440.892	220.446
40	HINT1	438.464	219.232
41	BTAF1	424.988	212.494
42	RPL7	404.294	202.147
43	RPA3	389.982	194.991
44	SOS1	389.917	194.958
45	RPL26	382.138	191.069
46	BCL10	375.617	187.808
47	RPS20	366.953	183.477
48	RPL24	357.775	178.887
49	MRPL32	356.626	178.313
50	CSNK1G3	355.331	177.665

## Sheet: purple
Supplementary Table 9: List of hub-high traffic genes identified in the candidate non-preserved modules along with their BC scores by both Cytohubba and Igraph methods
Rank	Name	Cytohubba_score	Igraph_score
1	MAPK1	9115.12	4557.56
2	CLTC	4029.56	2014.78
3	CUL2	3615.76	1807.88
4	CMTM6	3359.16	1679.58
5	VPS26A	3156.58	1578.29
6	ATP6V1D	3059.42	1529.71
7	PJA2	3024.03	1512.02
8	TXNRD1	2907.68	1453.84
9	RAB1A	2692.01	1346.01
10	TMED7	2456.28	1228.14
11	DICER1	2256.69	1128.34
12	RAB5A	2242.3	1121.15
13	TRIP12	2142.13	1071.07
14	HSP90B1	2055.83	1027.91
15	SNRPG	2047.24	1023.62
16	DNAJC10	2044.91	1022.46
17	MAGT1	2041.09	1020.54
18	LYPLA1	1974.13	987.067
19	HNRNPH2	1825.55	912.776
20	CYB5R4	1569.17	784.584
21	ADAM10	1561.88	780.942
22	CREB1	1531.46	765.732
23	TXNDC16	1530.14	765.068
24	VBP1	1504.37	752.183
25	SNX2	1405.02	702.51
26	STX12	1401.35	700.675
27	DPM1	1380.99	690.497
28	BLZF1	1328.85	664.425
29	OLA1	1323.73	661.865
30	SERINC1	1323.39	661.693
31	GMFB	1308.25	654.123
32	CUL5	1272.89	636.447
33	SEL1L	1245.55	622.777
34	CAPZA2	1204.75	602.376
35	LAMTOR3	1189.76	594.881
36	SH3BGRL	1116	558
37	AGPS	1013.12	506.559
38	GNG2	1012.99	506.494
39	KIAA1033	963.341	481.671
40	NRAS	922.11	461.055
41	SPTLC1	920.706	460.353
42	SH3GLB1	905.324	452.662
43	DUSP3	899.646	449.823
44	TIMM10B	869.776	434.888
45	C9orf72	863.072	431.536
46	MAP3K1	798.099	399.05
47	GFM1	785.983	392.992
48	RHEB	760.199	380.1
49	WRB	750	375
49	EFR3A	750	375

## Sheet: turquoise
Supplementary Table 9: List of hub-high traffic genes identified in the candidate non-preserved modules along with their BC scores by both Cytohubba and Igraph methods
Rank	Name	Cytohubba_score	Igraph_score
1	TP53	45930.1	22965
2	UTP14A	13853.6	6926.82
3	PXN	11896.5	5948.26
4	RUVBL2	11643	5821.51
5	MRTO4	10859.2	5429.59
6	PCBP1	8038.47	4019.23
7	POLR2H	7929.49	3964.74
8	BYSL	7887.77	3943.88
9	PRKCD	6976.68	3488.34
10	KEAP1	6807.97	3403.98
11	IMP3	6404.47	3202.24
12	CEBPA	5977.15	2988.57
13	ICT1	5778.29	2889.14
14	RPL26L1	5734.68	2867.34
15	ARHGAP30	5550.18	2775.09
16	PTPN6	5098.34	2549.17
17	WDR18	5049.13	2524.57
18	DDX28	4875.86	2437.93
19	RFC2	4725.4	2362.7
20	HGH1	4246.29	2123.15
21	PPARA	4162.93	2081.47
22	MRPS18B	4121.41	2060.7
23	COASY	3952.51	1976.25
24	MCM3	3845.15	1922.58
25	TNFRSF1A	3647.45	1823.72
26	PFDN6	3593.05	1796.53
27	PPP1R18	3432	1716
28	IKBKB	3406.47	1703.23
29	GID4	3069.29	1534.64
30	MROH1	3055.71	1527.86
31	POLR2I	3009.33	1504.67
32	FERMT3	2961.36	1480.68
33	TFEB	2783.77	1391.88
34	RPS6KA1	2750	1375
35	MKKS	2744	1372
36	SLC35C1	2725.02	1362.51
37	ING1	2706.87	1353.43
38	ARHGAP1	2667.82	1333.91
39	PSMD4	2629.71	1314.85
40	PHC2	2590.14	1295.07
41	S1PR4	2453.7	1226.85
42	MRPL15	2436.3	1218.15
43	ERAL1	2402.09	1201.05
44	TMEM101	2391.5	1195.75
45	LSM2	2371.54	1185.77
46	MRPL40	2338.13	1169.06
47	ZNHIT2	2311.7	1155.85
48	RNF8	2246.91	1123.46
49	DOLK	2245.88	1122.94
50	SHMT2	2244.6	1122.3
