# Supplementary material for: Differential Co-Expression Network Analysis Reveals Key Hub-High Traffic Genes as Potential Therapeutic Targets for COVID-19 Pandemic
Source: Front Immunol. 2021 Dec 15;12:789317. doi: 10.3389/fimmu.2021.789317 (PMC8714803; doi:10.3389/fimmu.2021.789317)
Supplement: Supplementary file 11 [file Table_10.xls]

## Sheet: ClueGO Results
GOID	GOTerm	Ontology Source	Term PValue	Term PValue Corrected with Bonferroni step down	Group PValue	Group PValue Corrected with Bonferroni step down	GOLevels	GOGroups	% Associated Genes	Nr. Genes	Associated Genes Found
GO:0031122	cytoplasmic microtubule organization	GO_BiologicalProcess-GOA_23.02.2017_10h01	0.00283521	0.0907267	0.00283521	0.0425282	[4, 5, 6]	Group00	8	4	[CCDC88B, STMN3, TUBGCP4, TUBGCP6]
GO:0036498	IRE1-mediated unfolded protein response	GO_BiologicalProcess-GOA_23.02.2017_10h01	0.0498141	0.149442	0.0498141	0.199257	[4, 5, 6, 7, 8]	Group01	4.28571	3	[ACD, SYVN1, YIF1A]
GO:0072583	clathrin-dependent endocytosis	GO_BiologicalProcess-GOA_23.02.2017_10h01	0.00581091	0.156894	0.00581091	0.0813527	[7]	Group02	6.55738	4	[FCHO1, SCRIB, SH3GL1, TNK2]
GO:0099131	ATP hydrolysis coupled ion transmembrane transport	GO_BiologicalProcess-GOA_23.02.2017_10h01	0.0498141	0.149442	0.0498141	0.199257	[6, 7]	Group03	4.28571	3	[ABCC1, ATP13A1, ATP2A3]
GO:1901264	carbohydrate derivative transport	GO_BiologicalProcess-GOA_23.02.2017_10h01	0.0368207	0.220924	0.0368207	0.257745	[4, 5]	Group04	4.83871	3	[SLC25A23, SLC25A25, SLC29A2]
GO:1903779	regulation of cardiac conduction	GO_BiologicalProcess-GOA_23.02.2017_10h01	0.0551891	0.0551891	0.0551891	0.110378	[3, 4, 5, 6, 7, 8]	Group05	4.10959	3	[ATP2A3, NPRL2, PRKACA]
GO:0016575	histone deacetylation	GO_BiologicalProcess-GOA_23.02.2017_10h01	0.0210998	0.253197	0.0210998	0.232097	[6, 7, 8, 9]	Group06	4.49438	4	[HDAC5, HDAC7, MTA1, MTA2]
GO:0038083	peptidyl-tyrosine autophosphorylation	GO_BiologicalProcess-GOA_23.02.2017_10h01	0.027104	0.27104	0.027104	0.27104	[8, 9, 10]	Group07	5.45455	3	[SLA2, TNK2, ZAP70]
GO:0031060	regulation of histone methylation	GO_BiologicalProcess-GOA_23.02.2017_10h01	0.0480824	0.19233	0.0480824	0.240412	[6, 7, 8, 9, 10]	Group08	4.34783	3	[EHMT2, MLLT6, ZNF335]
GO:0043162	ubiquitin-dependent protein catabolic process via the multivesicular body sorting pathway	GO_BiologicalProcess-GOA_23.02.2017_10h01	0.00115866	0.0393945	0.00115866	0.0196973	[8, 9, 10]	Group09	16.6667	3	[PTPN23, RNF126, UBAP1L]
GO:0043276	anoikis	GO_BiologicalProcess-GOA_23.02.2017_10h01	0.00739878	0.177571	0.00739878	0.0961842	[6]	Group10	8.82353	3	[AES, MYBBP1A, TSC2]
GO:0043507	positive regulation of JUN kinase activity	GO_BiologicalProcess-GOA_23.02.2017_10h01	0.051576	0.103152	0.051576	0.154728	[7, 8, 9, 10, 11, 12, 13, 14]	Group11	4.22535	3	[MAP2K7, MAP3K10, TRAF2]
GO:0043967	histone H4 acetylation	GO_BiologicalProcess-GOA_23.02.2017_10h01	0.0430702	0.215351	0.0430702	0.258421	[7, 8, 9, 11, 12]	Group12	4.54545	3	[EP400, JADE2, KAT2A]
GO:0045815	positive regulation of gene expression, epigenetic	GO_BiologicalProcess-GOA_23.02.2017_10h01	0.0338848	0.271079	0.0338848	0.271079	[5, 6, 7]	Group13	5	3	[KAT2A, MYBBP1A, TAF1C]
GO:0071158	positive regulation of cell cycle arrest	GO_BiologicalProcess-GOA_23.02.2017_10h01	0.0278655	0.250789	0.0278655	0.250789	[4, 5, 6, 7, 8]	Group14	4.12371	4	[CNOT3, MED25, MYBBP1A, PRKACA]
GO:0071242	cellular response to ammonium ion	GO_BiologicalProcess-GOA_23.02.2017_10h01	0.0430702	0.215351	0.0430702	0.258421	[5]	Group15	4.54545	3	[EHMT2, GRK2, PPP1R9B]
GO:0038034	signal transduction in absence of ligand	GO_BiologicalProcess-GOA_23.02.2017_10h01	0.0551891	0.0551891	0.0551891	0.110378	[3, 4, 5]	Group16	4.10959	3	[AGAP2, FASN, MKNK2]
GO:0097192	extrinsic apoptotic signaling pathway in absence of ligand	GO_BiologicalProcess-GOA_23.02.2017_10h01	0.0551891	0.0551891	0.0551891	0.110378	[4, 5, 6, 7, 8]	Group16	4.10959	3	[AGAP2, FASN, MKNK2]
GO:1904356	regulation of telomere maintenance via telomere lengthening	GO_BiologicalProcess-GOA_23.02.2017_10h01	0.0338848	0.271079	0.060829	0.060829	[4, 5, 6, 7, 8, 9]	Group17	5	3	[ACD, CTC1, MAP2K7]
GO:0051972	regulation of telomerase activity	GO_BiologicalProcess-GOA_23.02.2017_10h01	0.0234222	0.257644	0.060829	0.060829	[5, 6, 7, 8, 9]	Group17	5.76923	3	[ACD, CTC1, MAP2K7]
GO:0000422	mitophagy	GO_BiologicalProcess-GOA_23.02.2017_10h01	0.0181395	0.272093	0.00829064	0.0994877	[4, 5, 6, 7]	Group18	4.70588	4	[ATG2A, KAT2A, TSC2, ZDHHC8]
GO:0060606	tube closure	GO_BiologicalProcess-GOA_23.02.2017_10h01	0.00558941	0.156504	0.00829064	0.0994877	[4, 5, 6, 7]	Group18	5.20833	5	[KAT2A, KDM2B, PRKACA, SCRIB, TSC2]
GO:0061726	mitochondrion disassembly	GO_BiologicalProcess-GOA_23.02.2017_10h01	0.0181395	0.272093	0.00829064	0.0994877	[5, 6]	Group18	4.70588	4	[ATG2A, KAT2A, TSC2, ZDHHC8]
GO:0001841	neural tube formation	GO_BiologicalProcess-GOA_23.02.2017_10h01	0.0101793	0.213765	0.00829064	0.0994877	[4, 5, 6, 7, 8, 9]	Group18	4.5045	5	[KAT2A, KDM2B, PRKACA, SCRIB, TSC2]
GO:1903146	regulation of mitophagy	GO_BiologicalProcess-GOA_23.02.2017_10h01	0.0353369	0.247358	0.00829064	0.0994877	[5, 6, 7, 8]	Group18	4.91803	3	[KAT2A, TSC2, ZDHHC8]
GO:0014020	primary neural tube formation	GO_BiologicalProcess-GOA_23.02.2017_10h01	0.00691026	0.172757	0.00829064	0.0994877	[5, 6, 7, 8, 9, 10]	Group18	4.9505	5	[KAT2A, KDM2B, PRKACA, SCRIB, TSC2]
GO:0001843	neural tube closure	GO_BiologicalProcess-GOA_23.02.2017_10h01	0.00534843	0.155105	0.00829064	0.0994877	[5, 6, 7, 8, 9, 10, 11]	Group18	5.26316	5	[KAT2A, KDM2B, PRKACA, SCRIB, TSC2]
GO:0016482	cytosolic transport	GO_BiologicalProcess-GOA_23.02.2017_10h01	0.00168189	0.0555024	0.00215962	0.034554	[4, 5]	Group19	4.82759	7	[PTPN23, RNF126, SGSM2, TBC1D10B, TBC1D10C, TBC1D17, UBE2O]
GO:0042147	retrograde transport, endosome to Golgi	GO_BiologicalProcess-GOA_23.02.2017_10h01	0.000474296	0.0170747	0.00215962	0.034554	[5, 6]	Group19	7.14286	6	[RNF126, SGSM2, TBC1D10B, TBC1D10C, TBC1D17, UBE2O]
GO:1900181	negative regulation of protein localization to nucleus	GO_BiologicalProcess-GOA_23.02.2017_10h01	0.0188537	0.263951	0.00215962	0.034554	[3, 4, 5, 6, 7, 8]	Group19	4.65116	4	[ANAPC2, PARP10, SLC25A23, TBC1D10C]
GO:0031338	regulation of vesicle fusion	GO_BiologicalProcess-GOA_23.02.2017_10h01	0.00987938	0.227226	0.00215962	0.034554	[4, 5, 6, 7, 8]	Group19	5.6338	4	[SGSM2, TBC1D10B, TBC1D10C, TBC1D17]
GO:0046823	negative regulation of nucleocytoplasmic transport	GO_BiologicalProcess-GOA_23.02.2017_10h01	0.0167624	0.268199	0.00215962	0.034554	[4, 5, 6, 7, 8]	Group19	4.81928	4	[ANAPC2, PARP10, SLC25A23, TBC1D10C]
GO:0090630	activation of GTPase activity	GO_BiologicalProcess-GOA_23.02.2017_10h01	8.7323e-05	0.00323095	0.00215962	0.034554	[7]	Group19	7.86517	7	[ANAPC2, SCRIB, SGSM2, SLC25A23, TBC1D10B, TBC1D10C, TBC1D17]
GO:1904590	negative regulation of protein import	GO_BiologicalProcess-GOA_23.02.2017_10h01	0.0113855	0.216325	0.00215962	0.034554	[4, 5, 6, 7, 8, 9, 10]	Group19	5.40541	4	[ANAPC2, PARP10, SLC25A23, TBC1D10C]
GO:0042308	negative regulation of protein import into nucleus	GO_BiologicalProcess-GOA_23.02.2017_10h01	0.0113855	0.216325	0.00215962	0.034554	[4, 5, 6, 7, 8, 9, 10, 11, 12, 13]	Group19	5.40541	4	[ANAPC2, PARP10, SLC25A23, TBC1D10C]
GO:0031668	cellular response to extracellular stimulus	GO_BiologicalProcess-GOA_23.02.2017_10h01	0.000950982	0.0332844	0.000119745	0.00215542	[3, 4]	Group20	4.24528	9	[AES, EHMT2, FASN, MYBBP1A, NPRL2, NPRL3, PPP1R9B, SLA2, USF2]
GO:0007033	vacuole organization	GO_BiologicalProcess-GOA_23.02.2017_10h01	0.00347628	0.107765	0.000119745	0.00215542	[4]	Group20	4.24242	7	[ACD, ATG2A, EHMT2, NPRL2, NPRL3, TECPR1, TMEM175]
GO:0009267	cellular response to starvation	GO_BiologicalProcess-GOA_23.02.2017_10h01	0.0042914	0.128742	0.000119745	0.00215542	[4, 5, 6]	Group20	4.65116	6	[EHMT2, FASN, MYBBP1A, NPRL2, NPRL3, SLA2]
GO:0044088	regulation of vacuole organization	GO_BiologicalProcess-GOA_23.02.2017_10h01	0.0189667	0.246567	0.000119745	0.00215542	[5, 6]	Group20	6.25	3	[EHMT2, NPRL2, NPRL3]
GO:1905037	autophagosome organization	GO_BiologicalProcess-GOA_23.02.2017_10h01	0.0124673	0.211944	0.000119745	0.00215542	[5, 6]	Group20	5.26316	4	[ATG2A, EHMT2, NPRL2, NPRL3]
GO:0000045	autophagosome assembly	GO_BiologicalProcess-GOA_23.02.2017_10h01	0.0108681	0.217362	0.000119745	0.00215542	[5, 6, 7]	Group20	5.47945	4	[ATG2A, EHMT2, NPRL2, NPRL3]
GO:0034198	cellular response to amino acid starvation	GO_BiologicalProcess-GOA_23.02.2017_10h01	0.011602	0.208836	0.000119745	0.00215542	[5, 6, 7]	Group20	7.5	3	[FASN, NPRL2, NPRL3]
GO:2000785	regulation of autophagosome assembly	GO_BiologicalProcess-GOA_23.02.2017_10h01	0.0100779	0.221713	0.000119745	0.00215542	[4, 5, 6, 7, 8]	Group20	7.89474	3	[EHMT2, NPRL2, NPRL3]
GO:0032007	negative regulation of TOR signaling	GO_BiologicalProcess-GOA_23.02.2017_10h01	0.011602	0.208836	0.000119745	0.00215542	[5, 6, 7, 8]	Group20	7.5	3	[NPRL2, NPRL3, TSC2]
GO:0050869	negative regulation of B cell activation	GO_BiologicalProcess-GOA_23.02.2017_10h01	0.00623925	0.16222	0.000119745	0.00215542	[5, 6, 7, 8]	Group20	9.375	3	[FASN, SLA2, TBC1D10C]
